# Supplementary material
Source: PubMed Central journal article supplement (PMC3759823)

S I V V T N y E E S I K

4-hydroxyphenylpyruvic acid dioxygenase

Charge State: +3

Scan Number: 5567

File Name: 091130ptp1blivers\_hfd\_basal2.raw

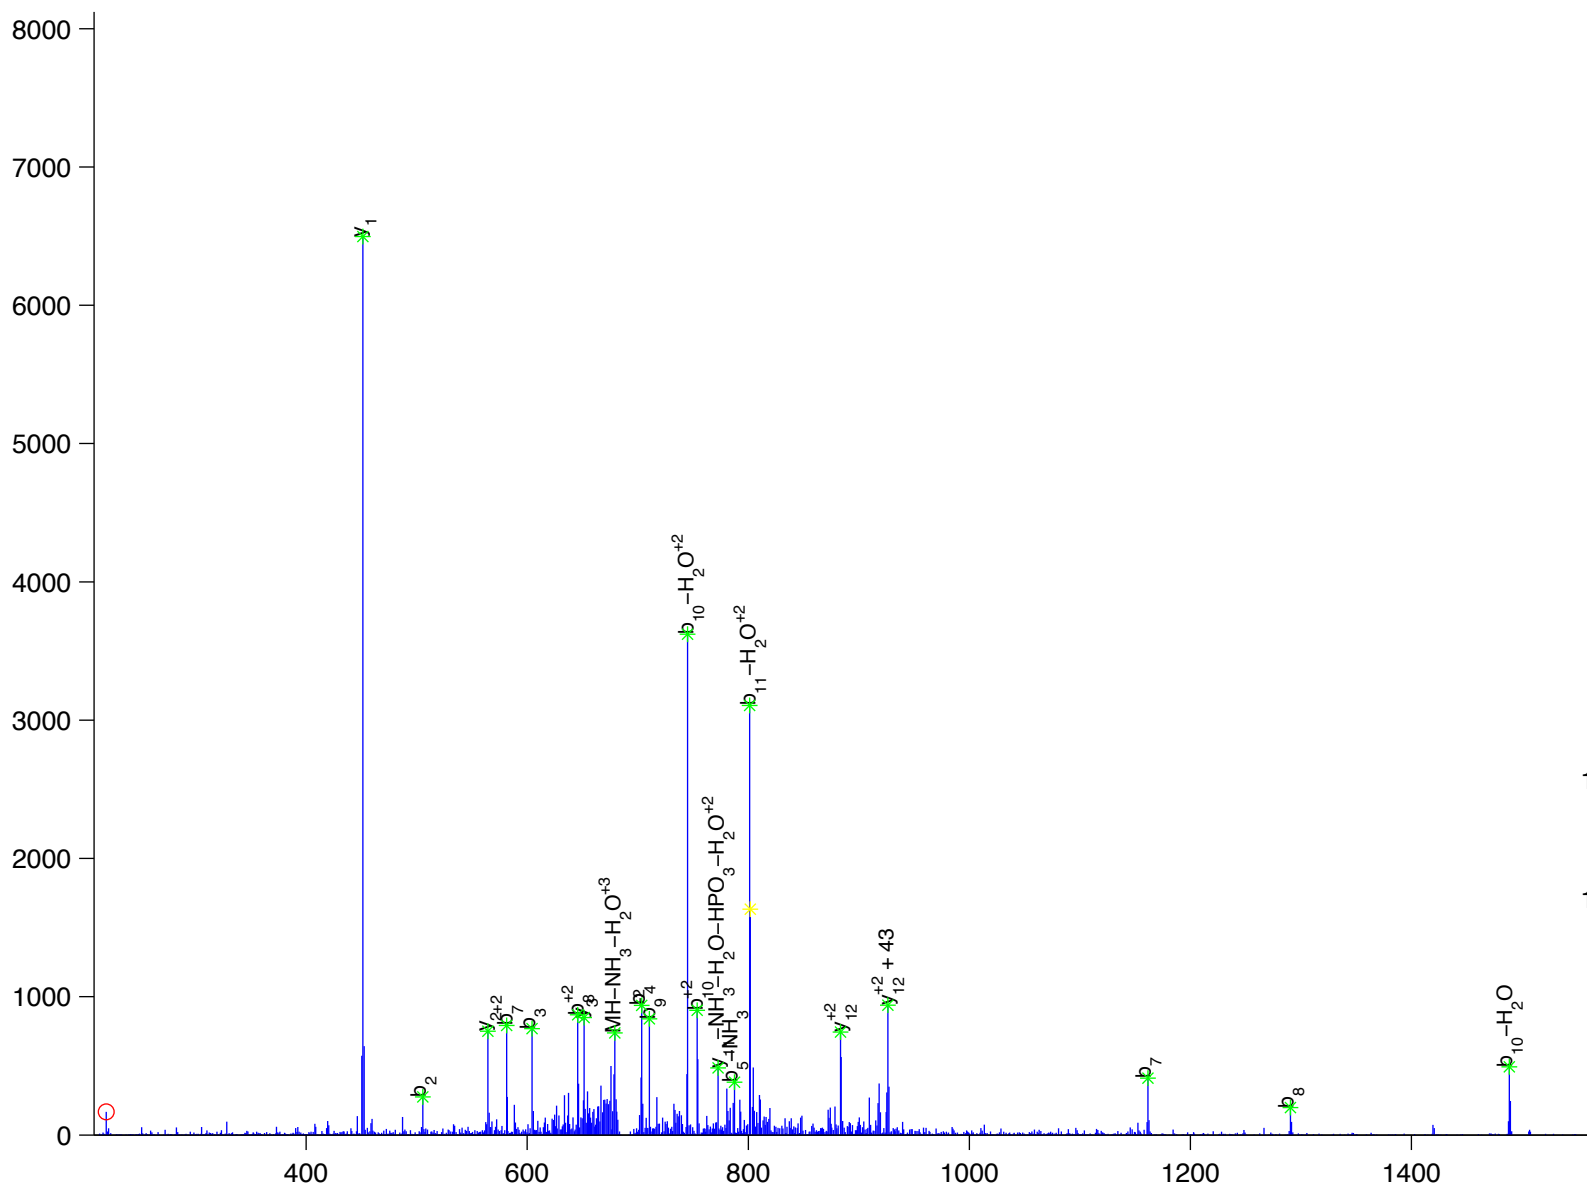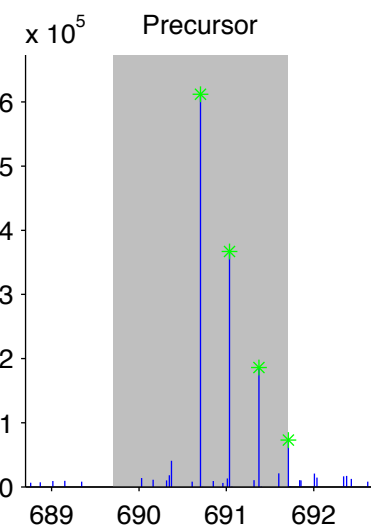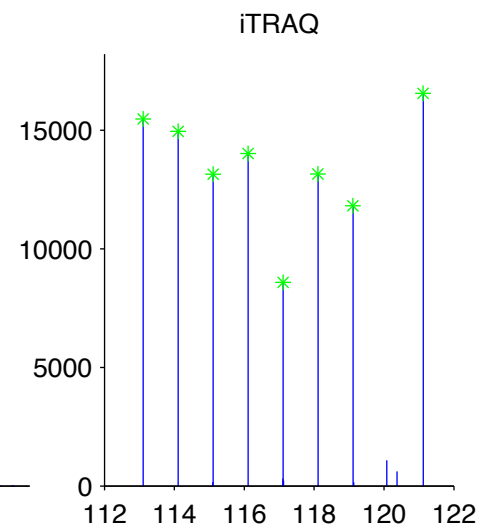

F [ W ] S [ V ] D [ D ] T [ Q ] V [ H ] T [ E ] y [ S ] S [ L ] R

4-hydroxyphenylpyruvic acid dioxygenase  
 Charge State: +3  
 Scan Number: 7378  
 File Name: 090806ptp1blivers\_M\_NC2.raw

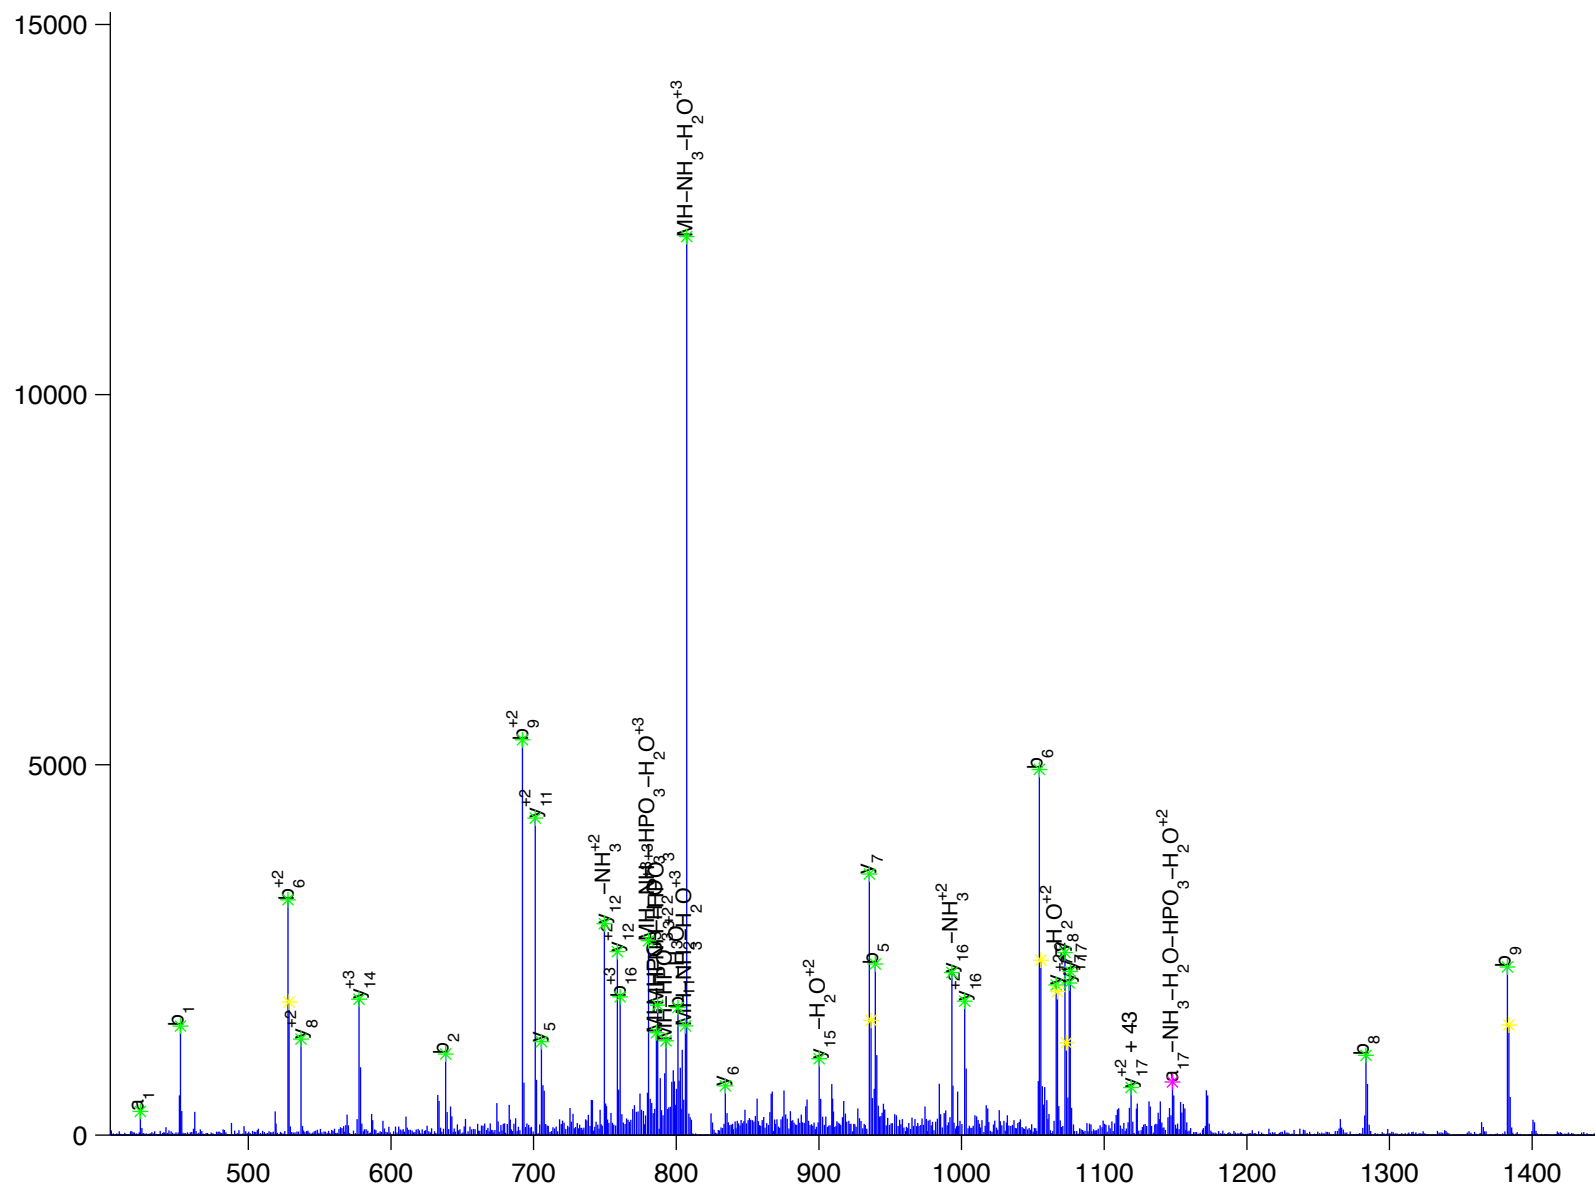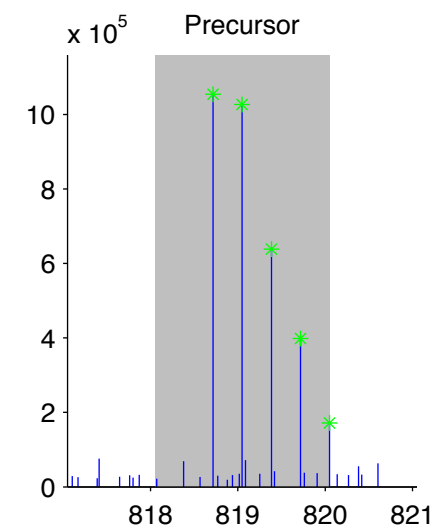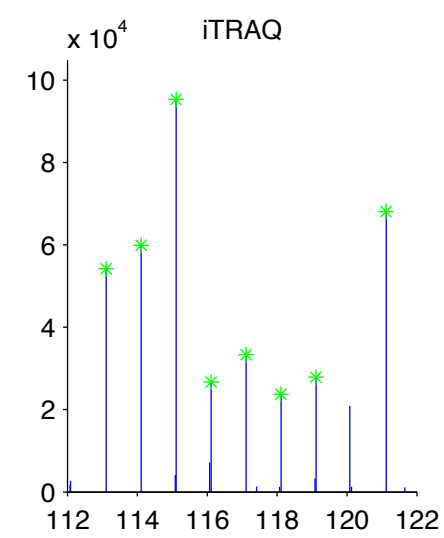



R [ G ] W [ D ] E [ N ] V [ y ] Y [ T ] V [ P ] L [ V ] R

4-nitrophenylphosphatase domain and non-neuronal SNAP25-like protein homolog 1

Charge State: +3

Scan Number: 6717

File Name: 091130ptp1blivers\_hfd\_basal2.raw

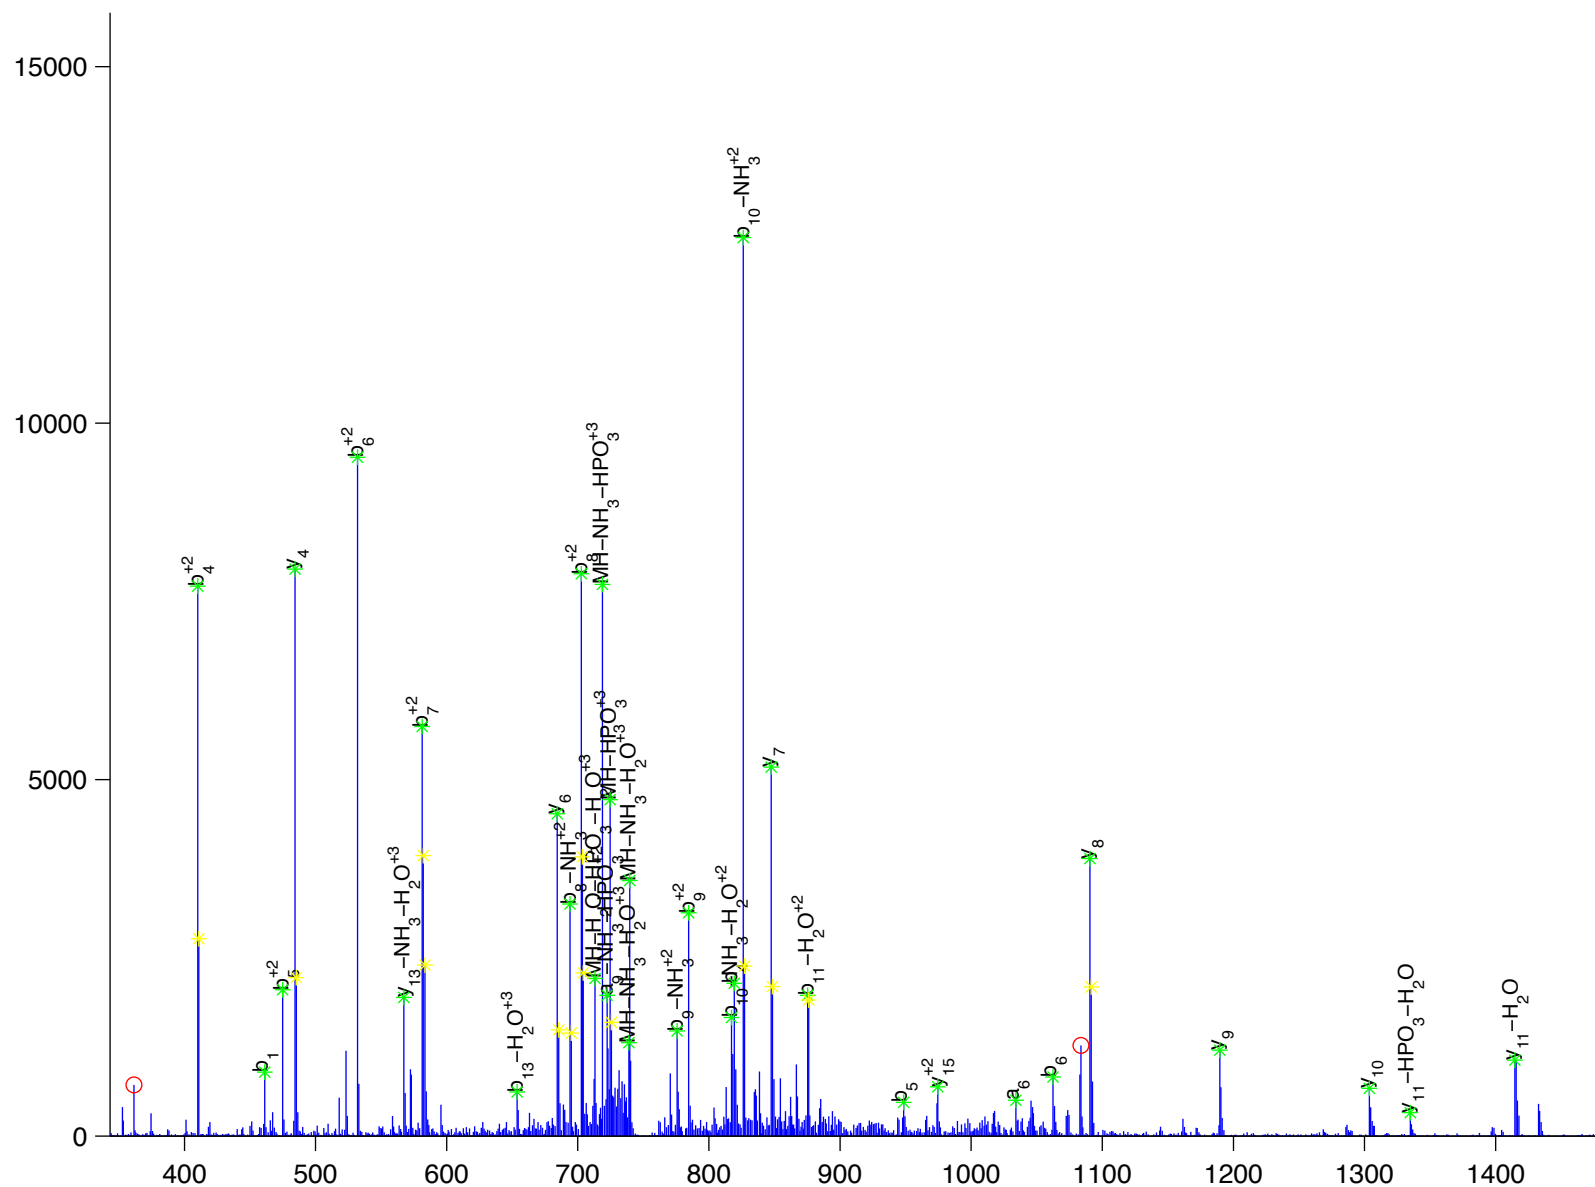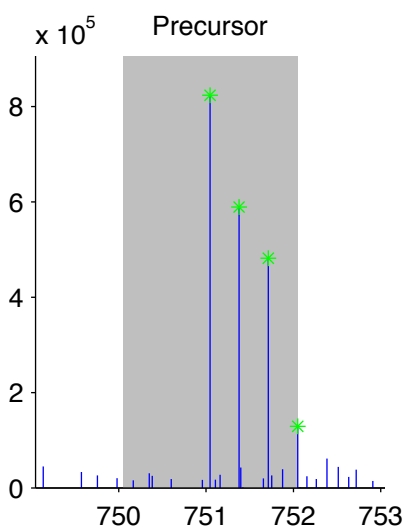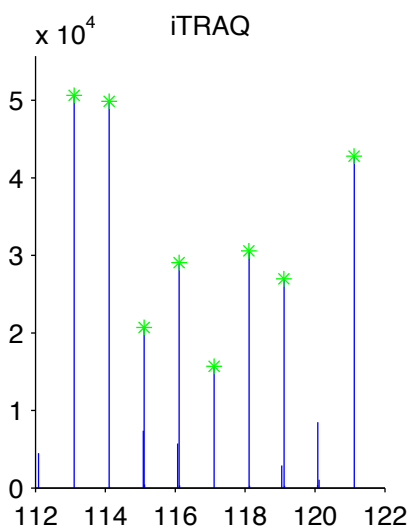

G [ W ] [ D ] [ E ] [ N ] [ V ] y [ Y ] T [ V ] P [ L ] [ V ] R

4-nitrophenylphosphatase domain and non-neuronal SNAP25-like protein homolog 1

Charge State: +3

Scan Number: 8751

File Name: 090806ptp1blivers\_M\_NC2.raw

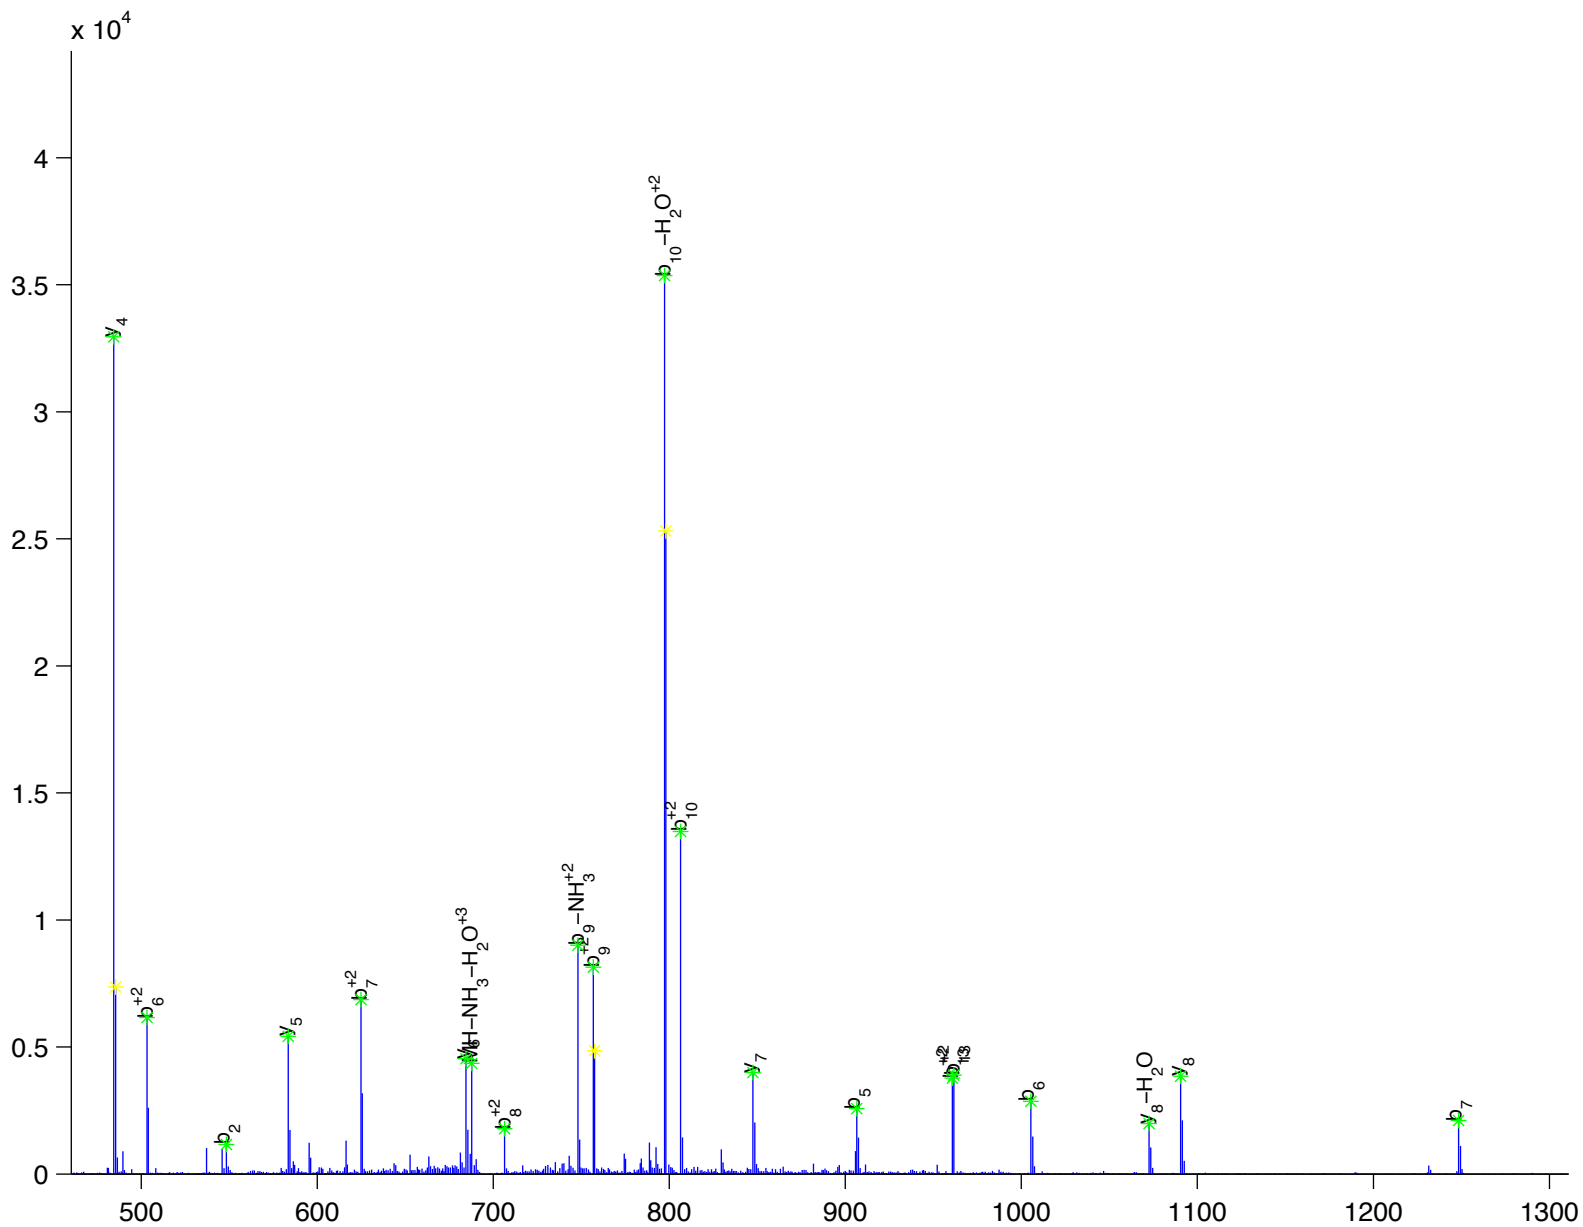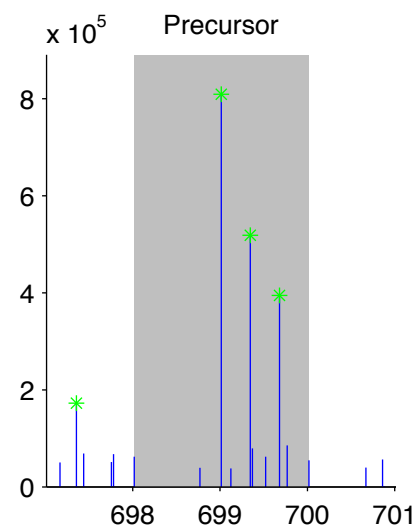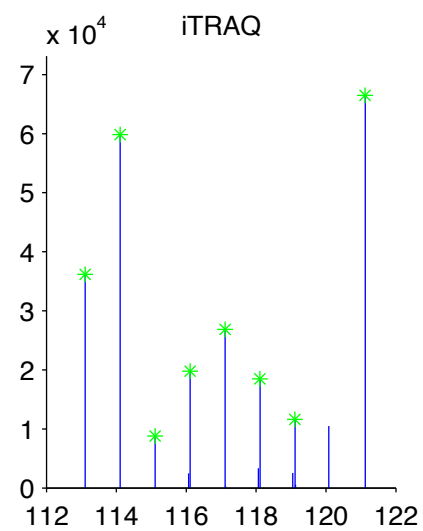

I [A] [A] [F] [A] [D] [A] [A] [V] [D] [P] [I] [D] [F] [P] [L] [A] [P] [A] [y] [A] [V] [P] [K]

acetyl-Coenzyme A acetyltransferase 1 precursor

Charge State: +4

Scan Number: 4904

File Name: HJ072909\_HFD\_E1\_2.raw

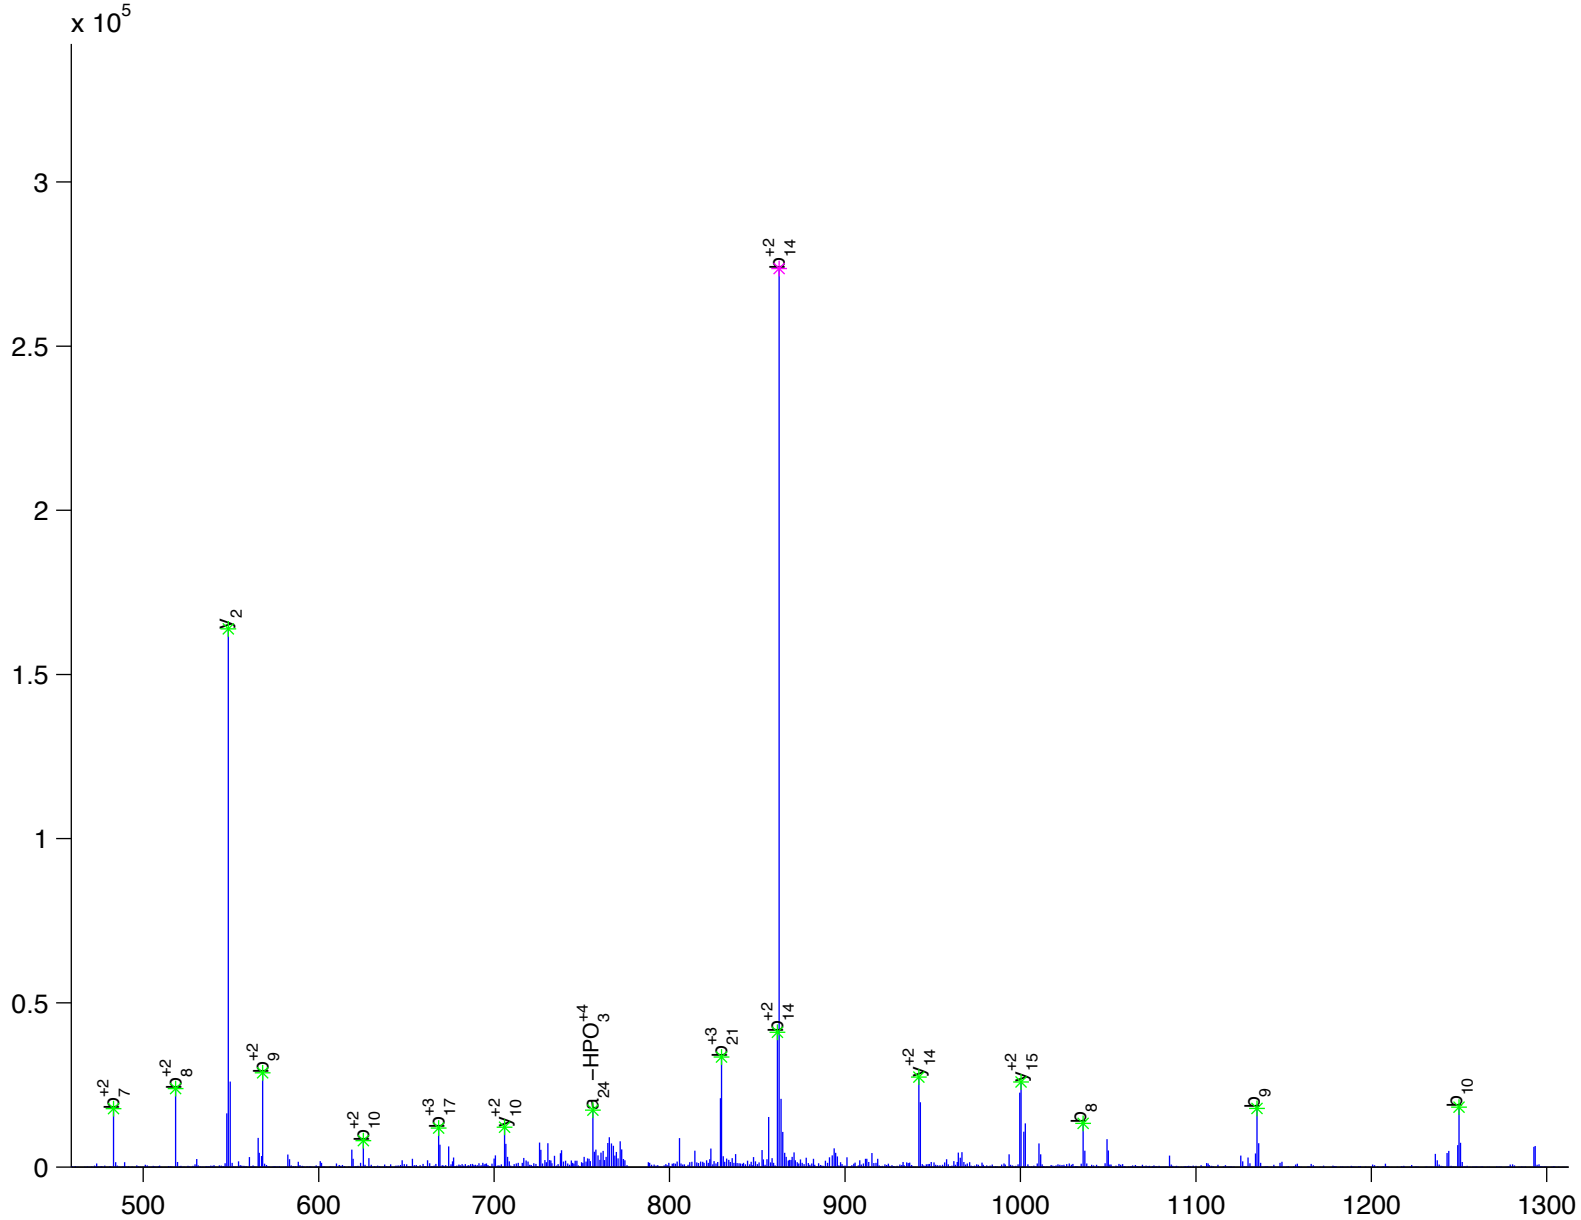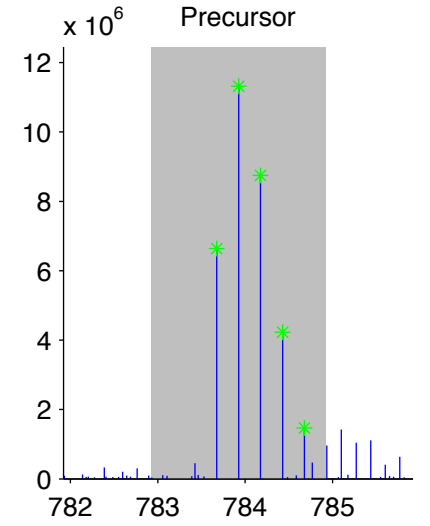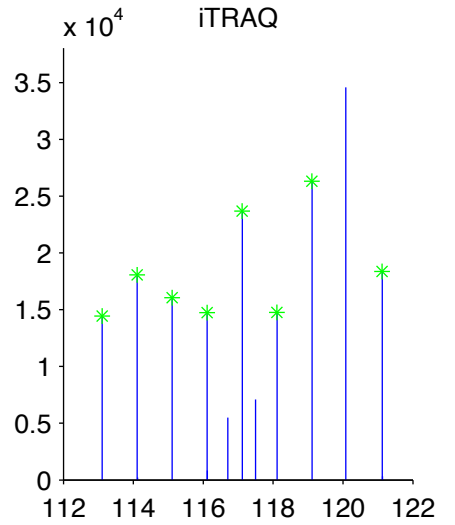

A [ A ] N [ E ] A [ G ] y [ F ] N [ E ] E [ M ] A [ P ] I [ E ] V [ K ]

acetyl-Coenzyme A acyltransferase 2 (mitochondrial 3-oxoacyl-Coenzyme A thiolase)

Charge State: +3

Scan Number: 5587

File Name: 100905ptp1blivers\_ncHFD\_basal.raw

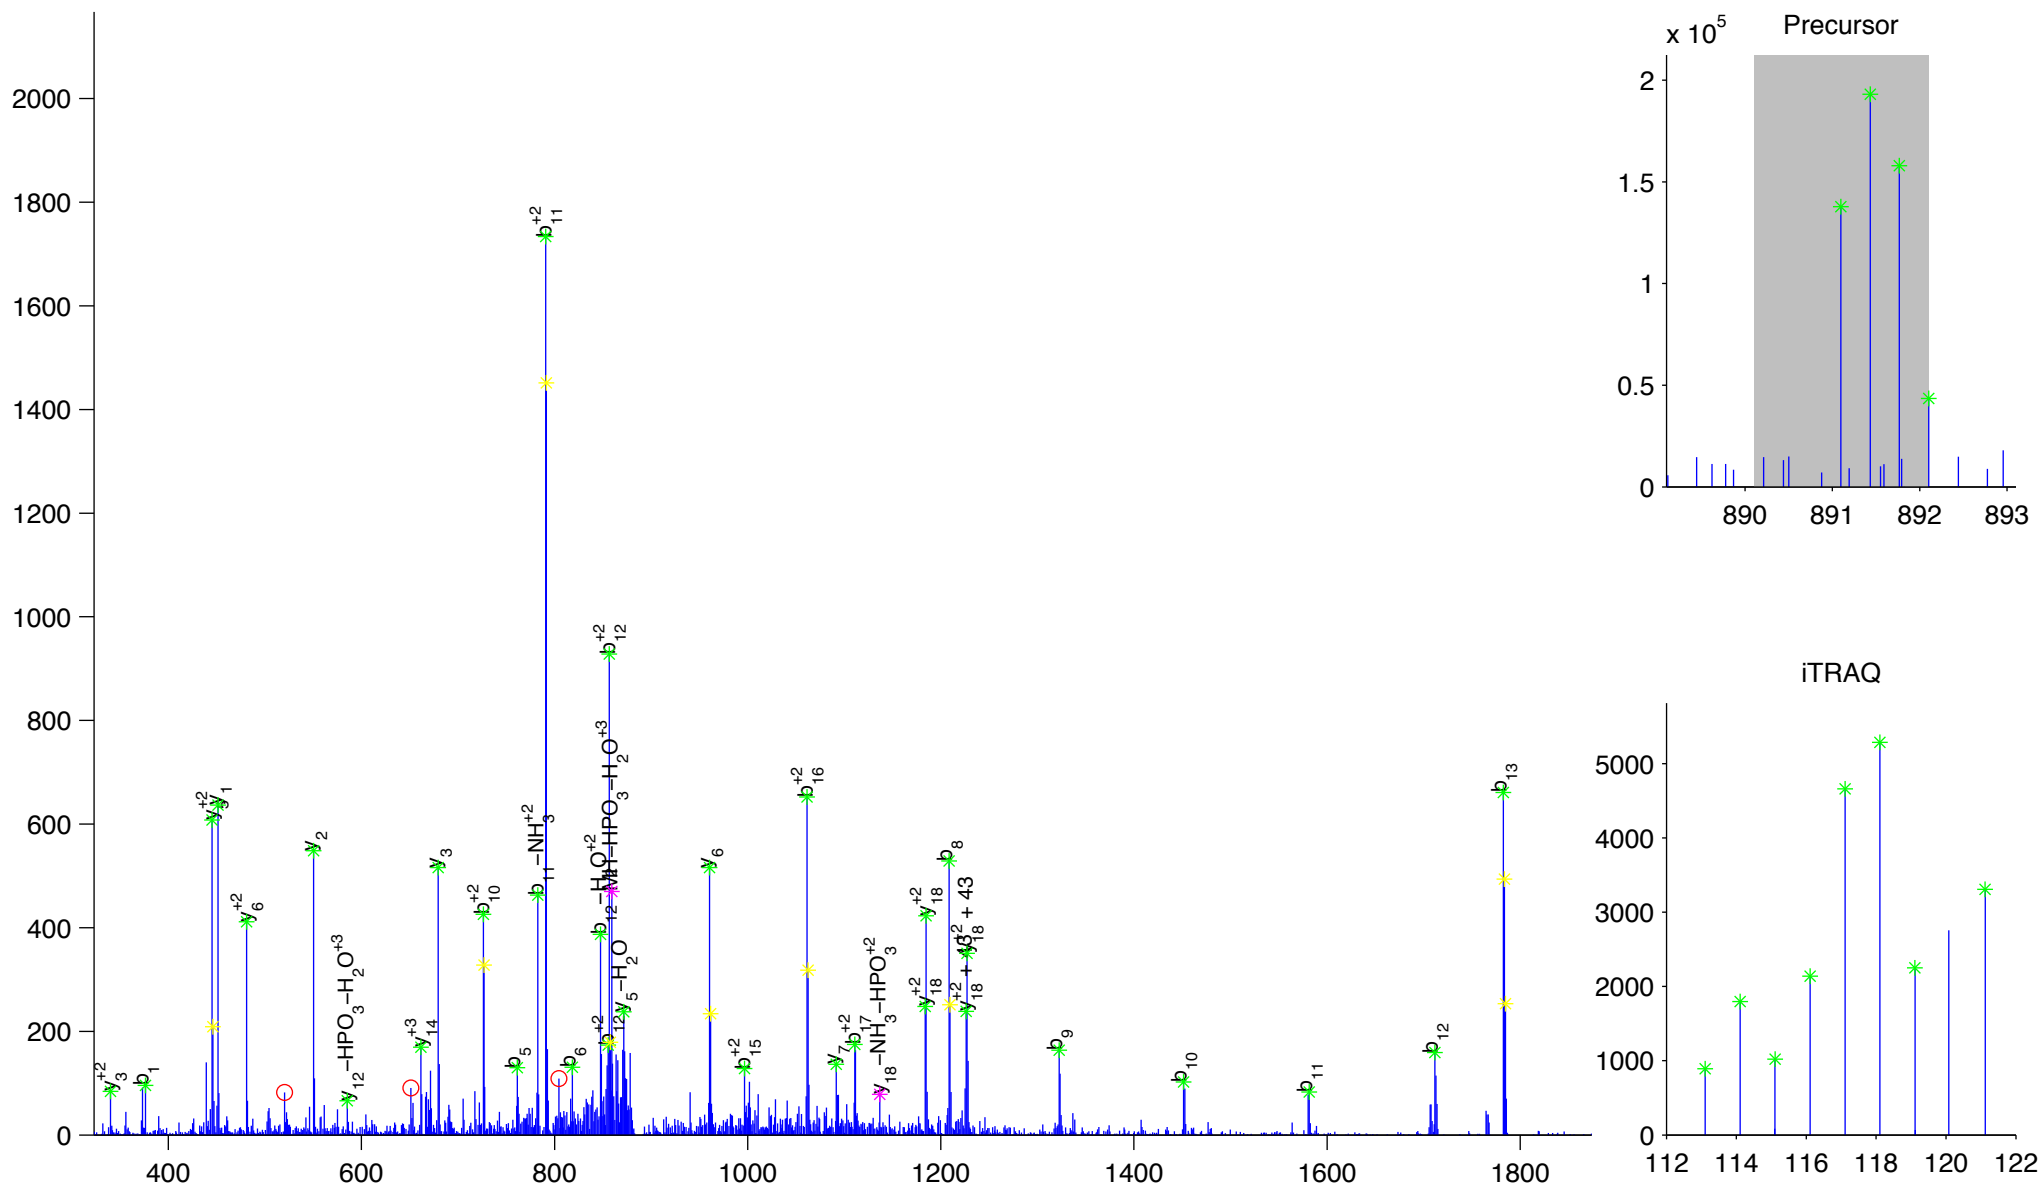

I [E] S [P] [E] G [Y] y [E] E [A] E [P] F [D] R

actin filament associated protein 1-like 2

Charge State: +3

Scan Number: 4975

File Name: 090728ptp1blivers\_M\_NC\_ins\_e.raw

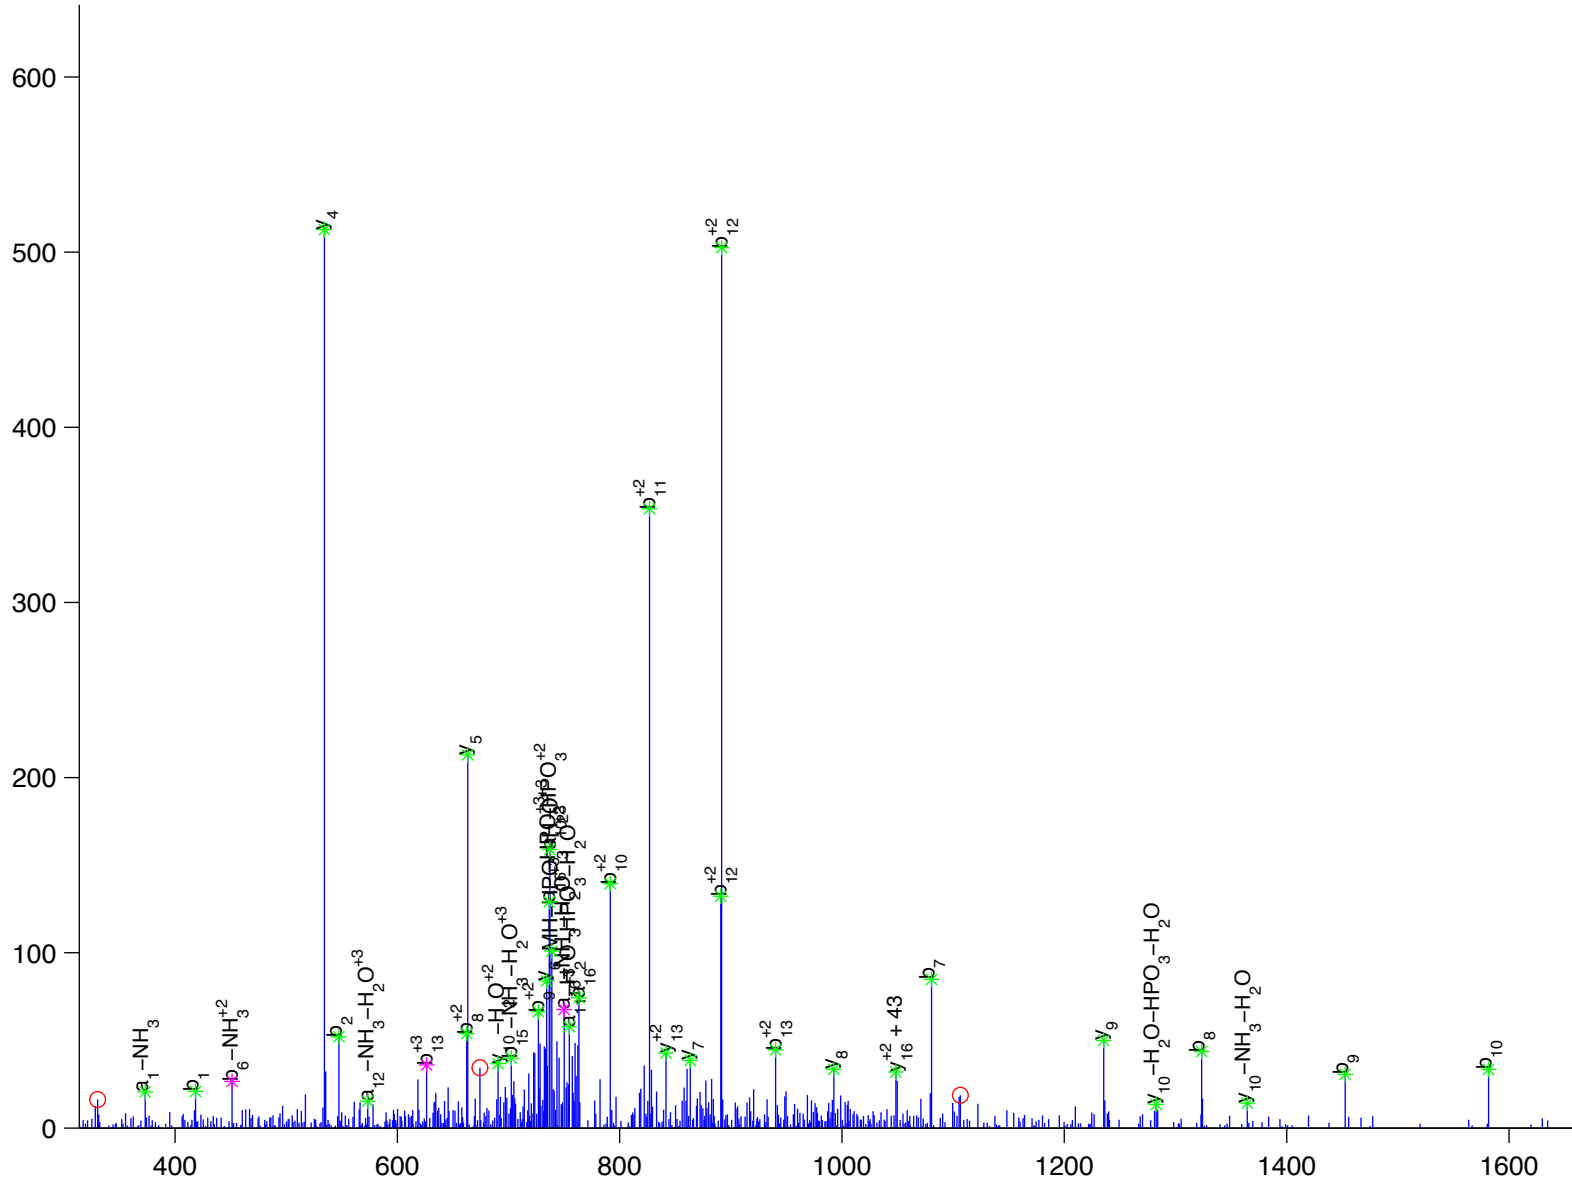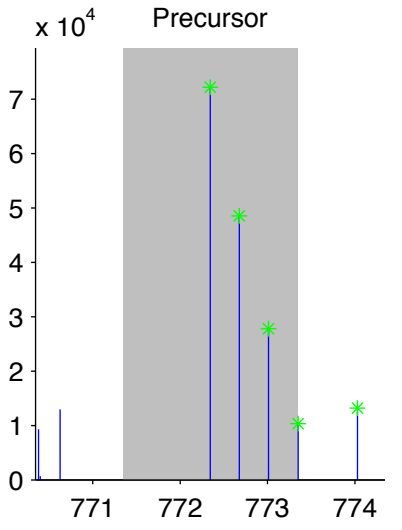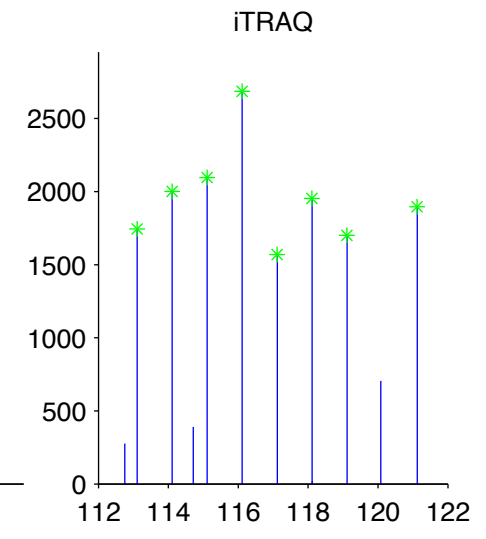



V[A]Q[Q]P[L]S[L]V[G]C[D]V[L]P[D]P[S]P[D]H[L]y[S]F[R]

actin filament associated protein 1-like 2

Charge State: +4

Scan Number: 9630

File Name: 0090807ptp1blivers\_M\_HFD2.raw

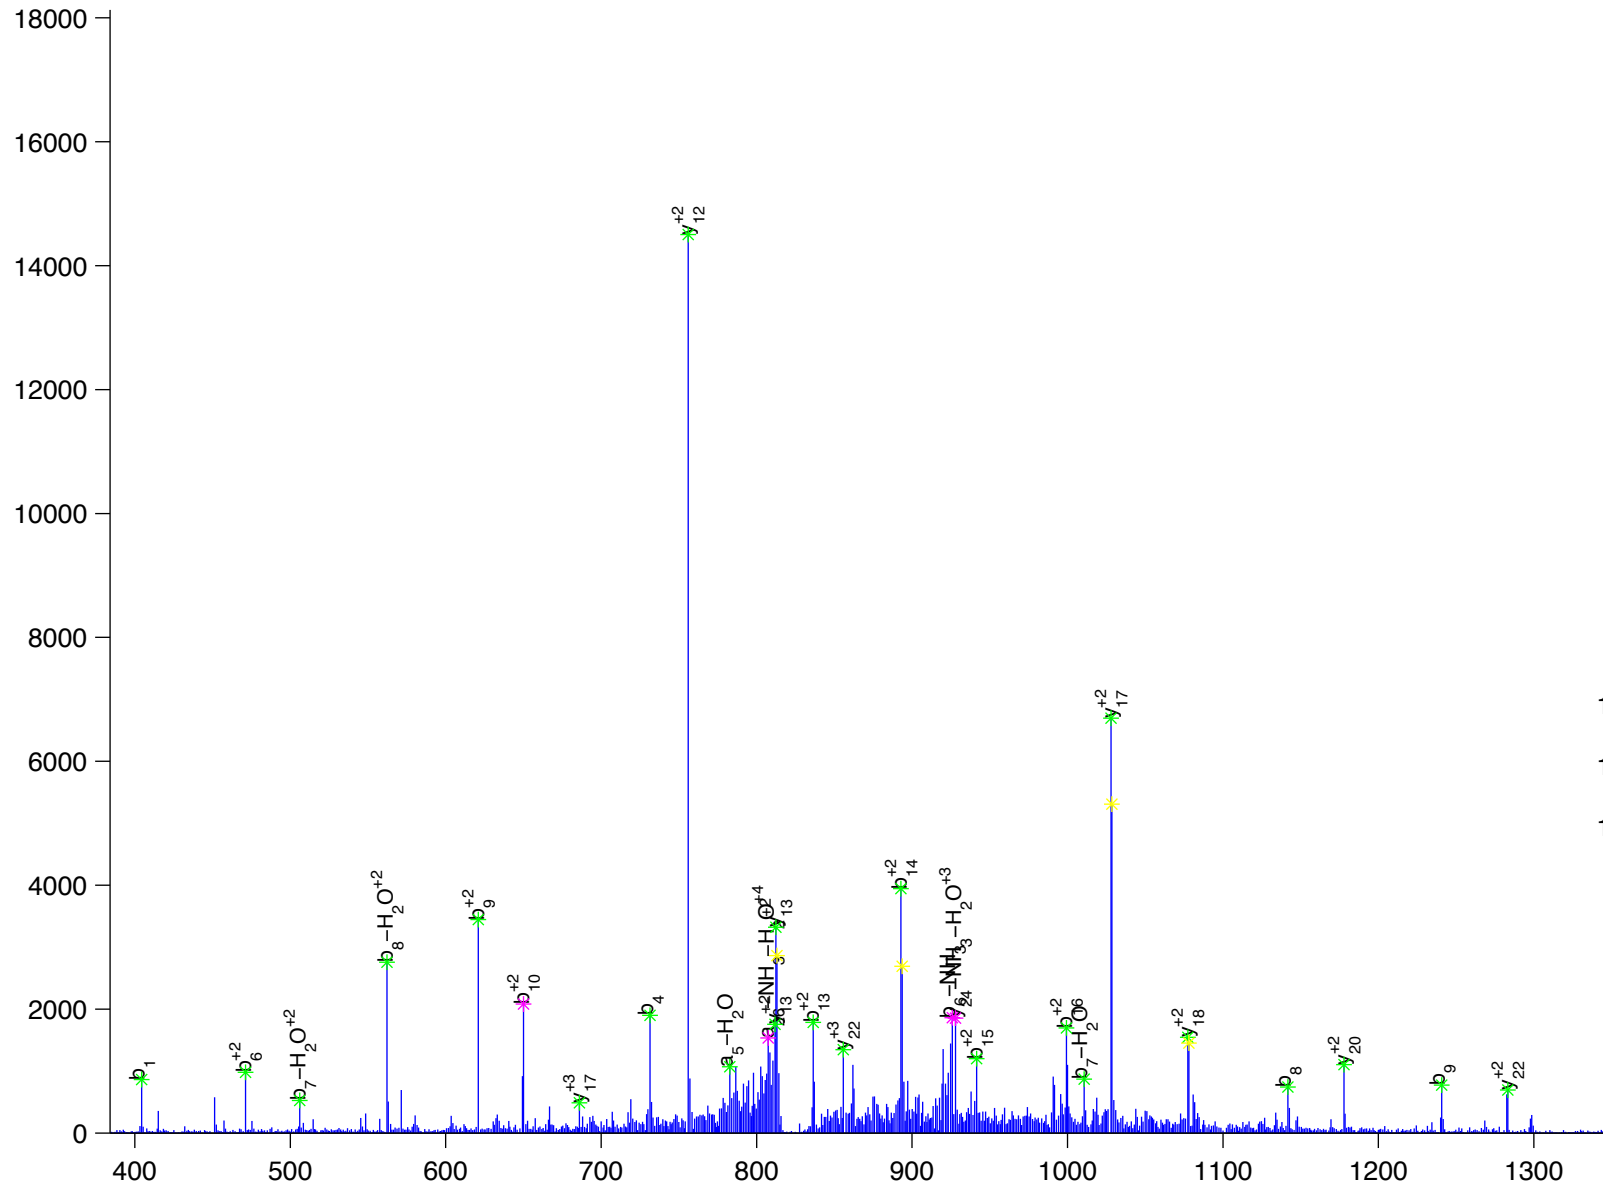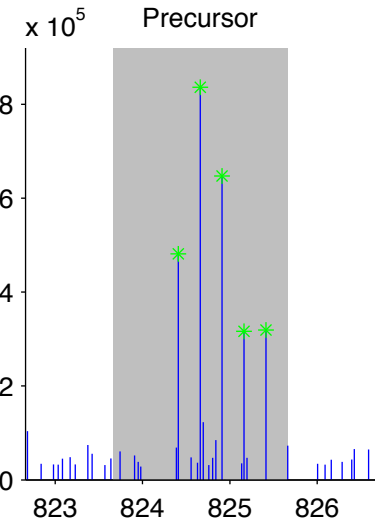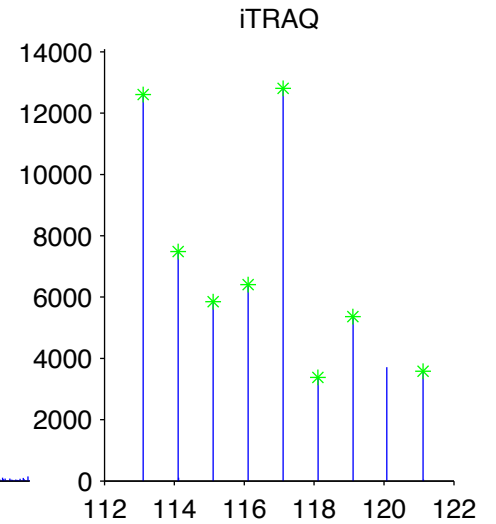

T [ Q ] P [ T ] D [ E ] E [ M ] L [ F ] I [ y ] S [ H ] F [ K ]

acyl-CoA binding protein / diazepam binding inhibitor isoform 2

Charge State: +4

Scan Number: 3149

File Name: HJ072909\_HFD\_E1\_2.raw

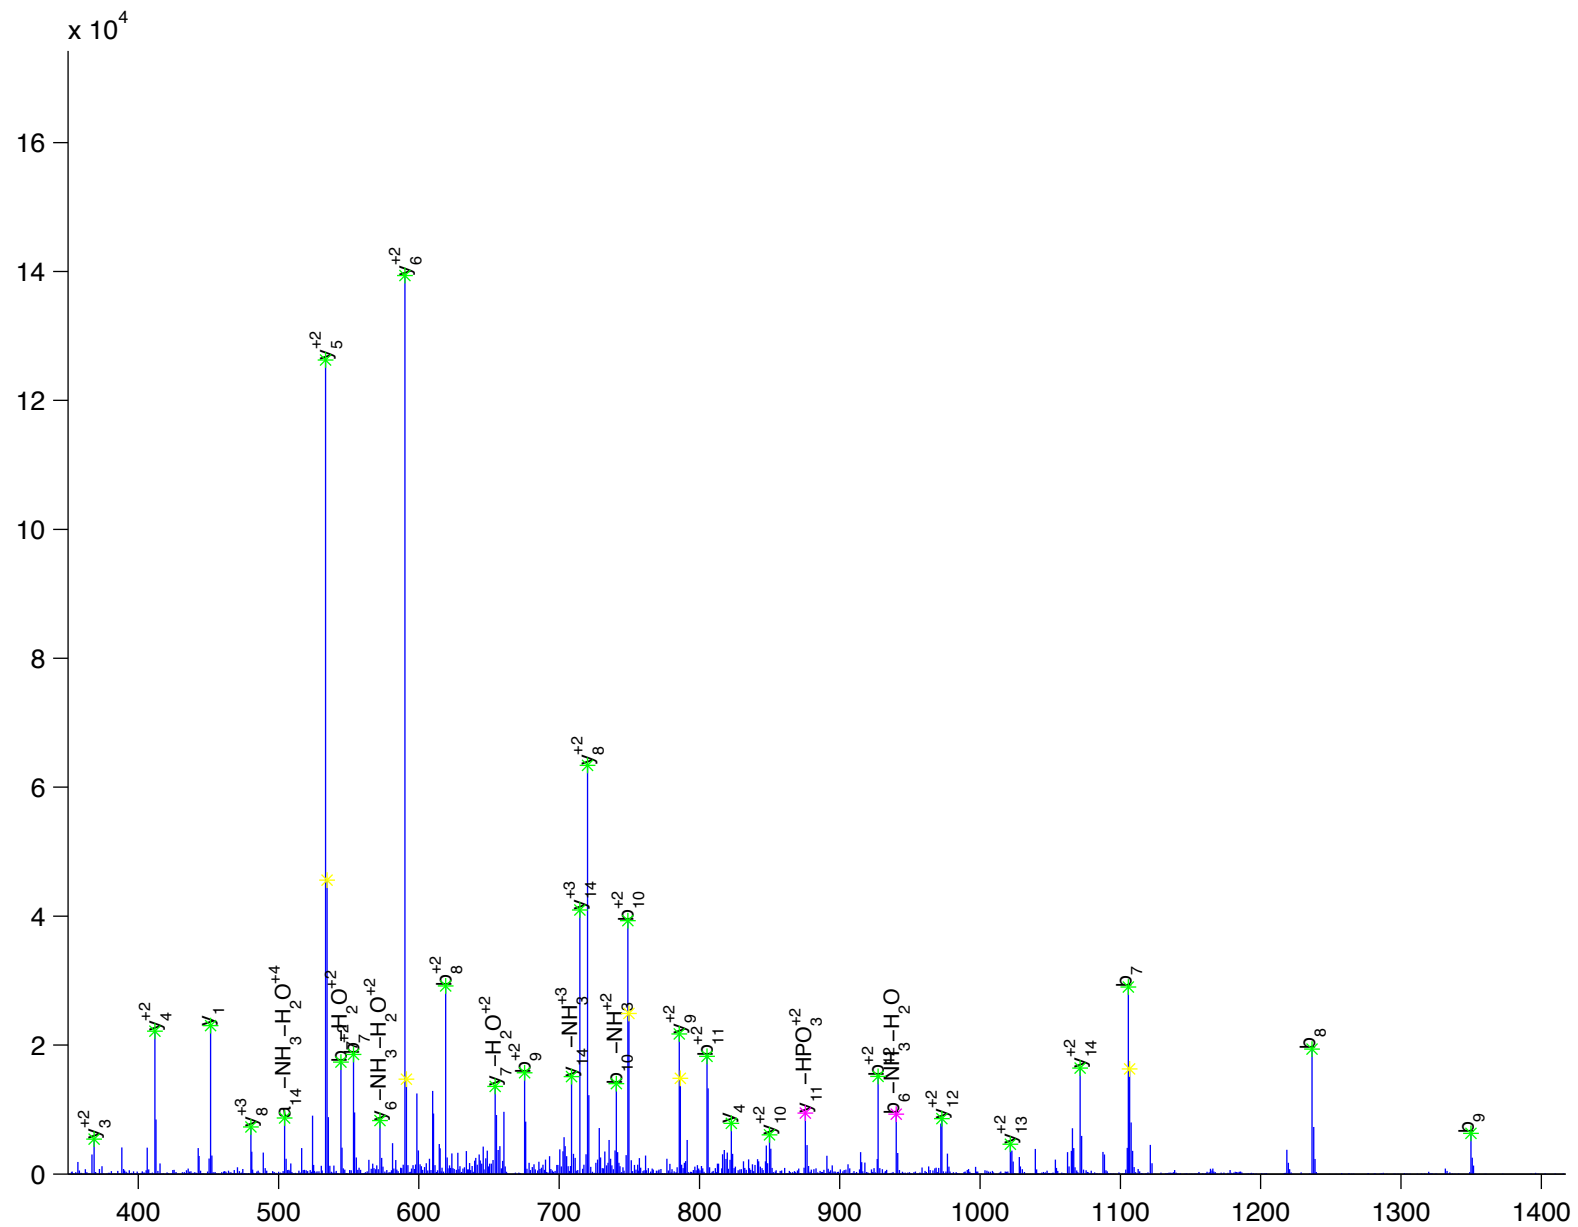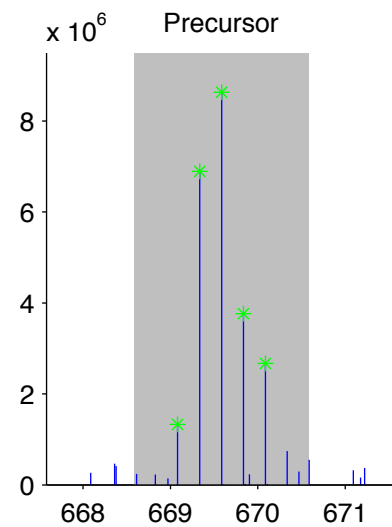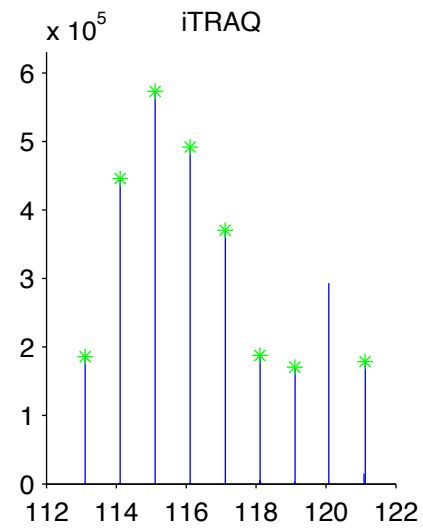

L[K]T[Q]P[T]D[E]E[M]L[F]I[y]S[H]F[K]

acyl-CoA binding protein / diazepam binding inhibitor isoform 2

Charge State: +4

Scan Number: 9399

File Name: 090807ptp1blivers\_M\_HFD\_basal.raw

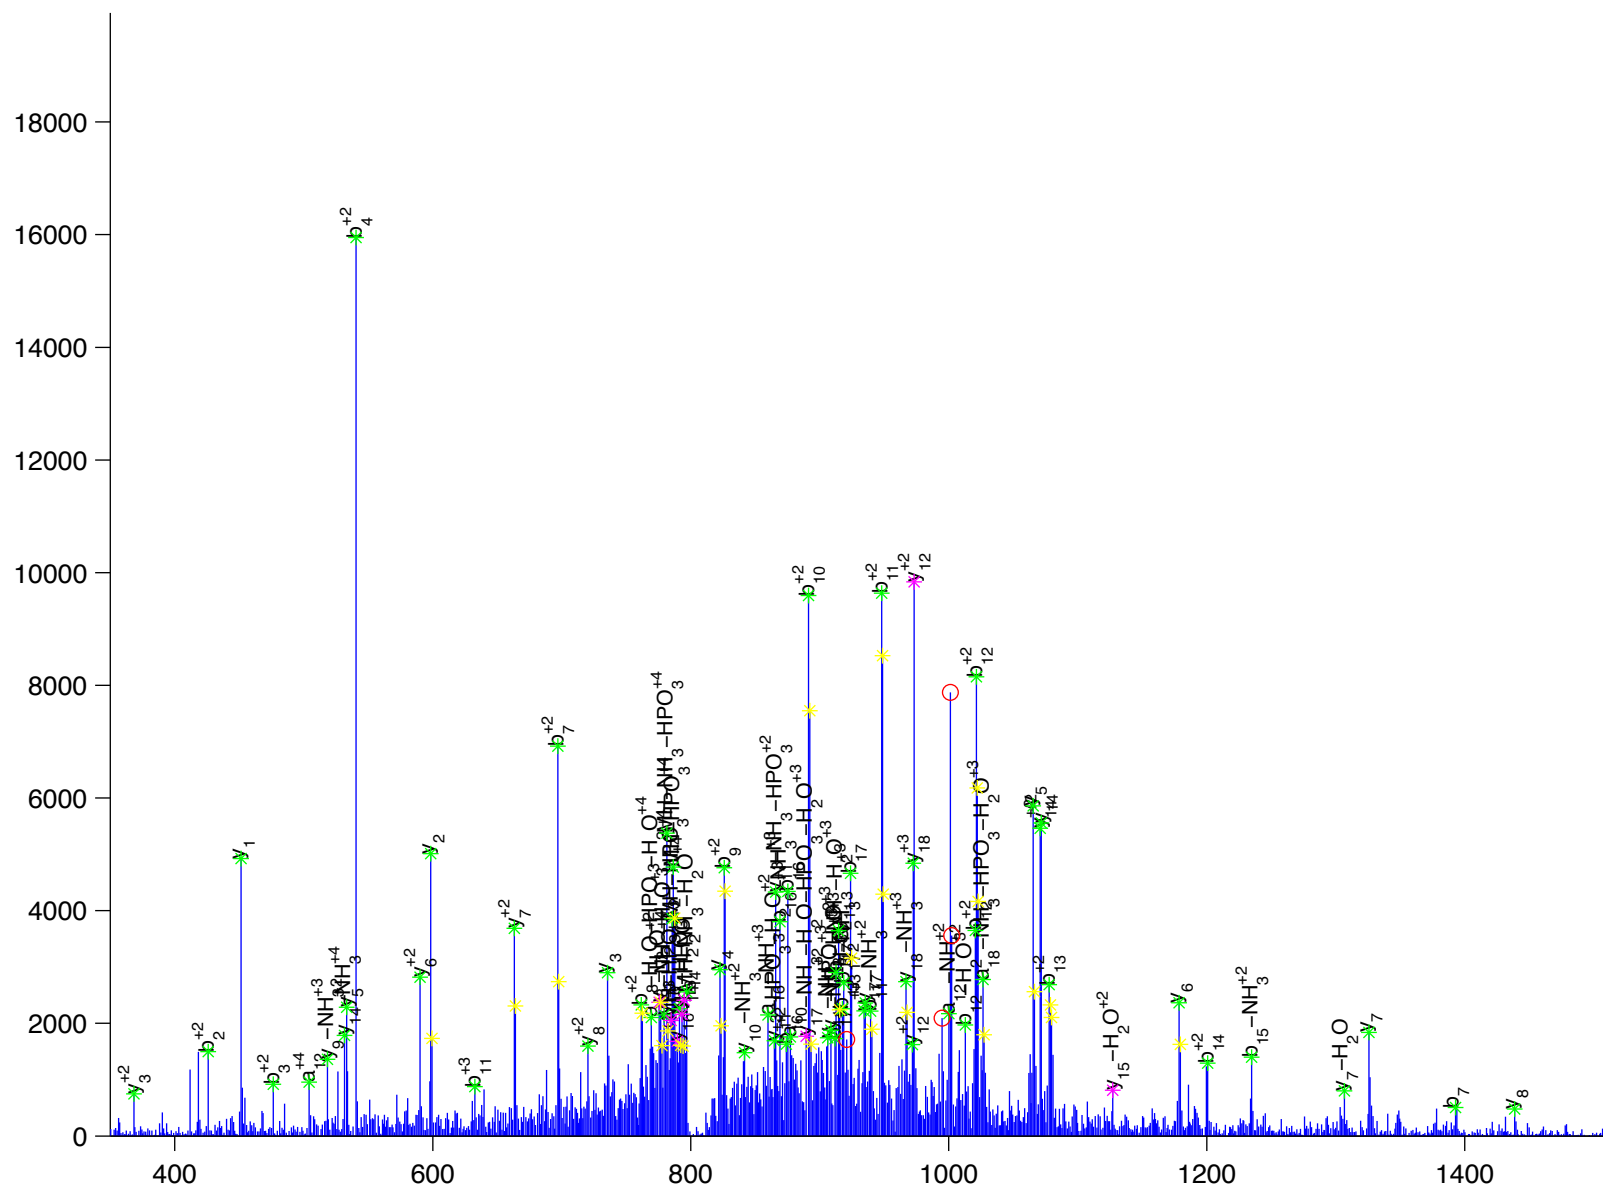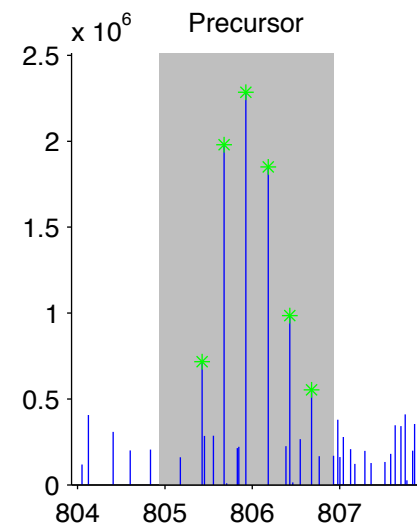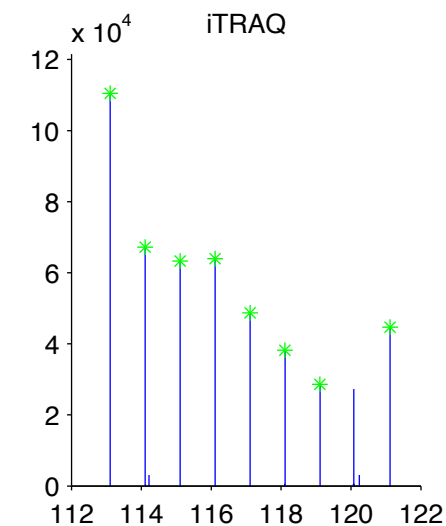

N [ N ] [ D ] [ L ] [ I ] [ L ] [ y ] [ Y ] [ F ] [ S ] [ D ] [ A ] K

acyl-CoA synthetase long-chain family member 5

Charge State: +3

Scan Number: 6914

File Name: 100905ptp1blivers\_ncHFD\_basal.raw

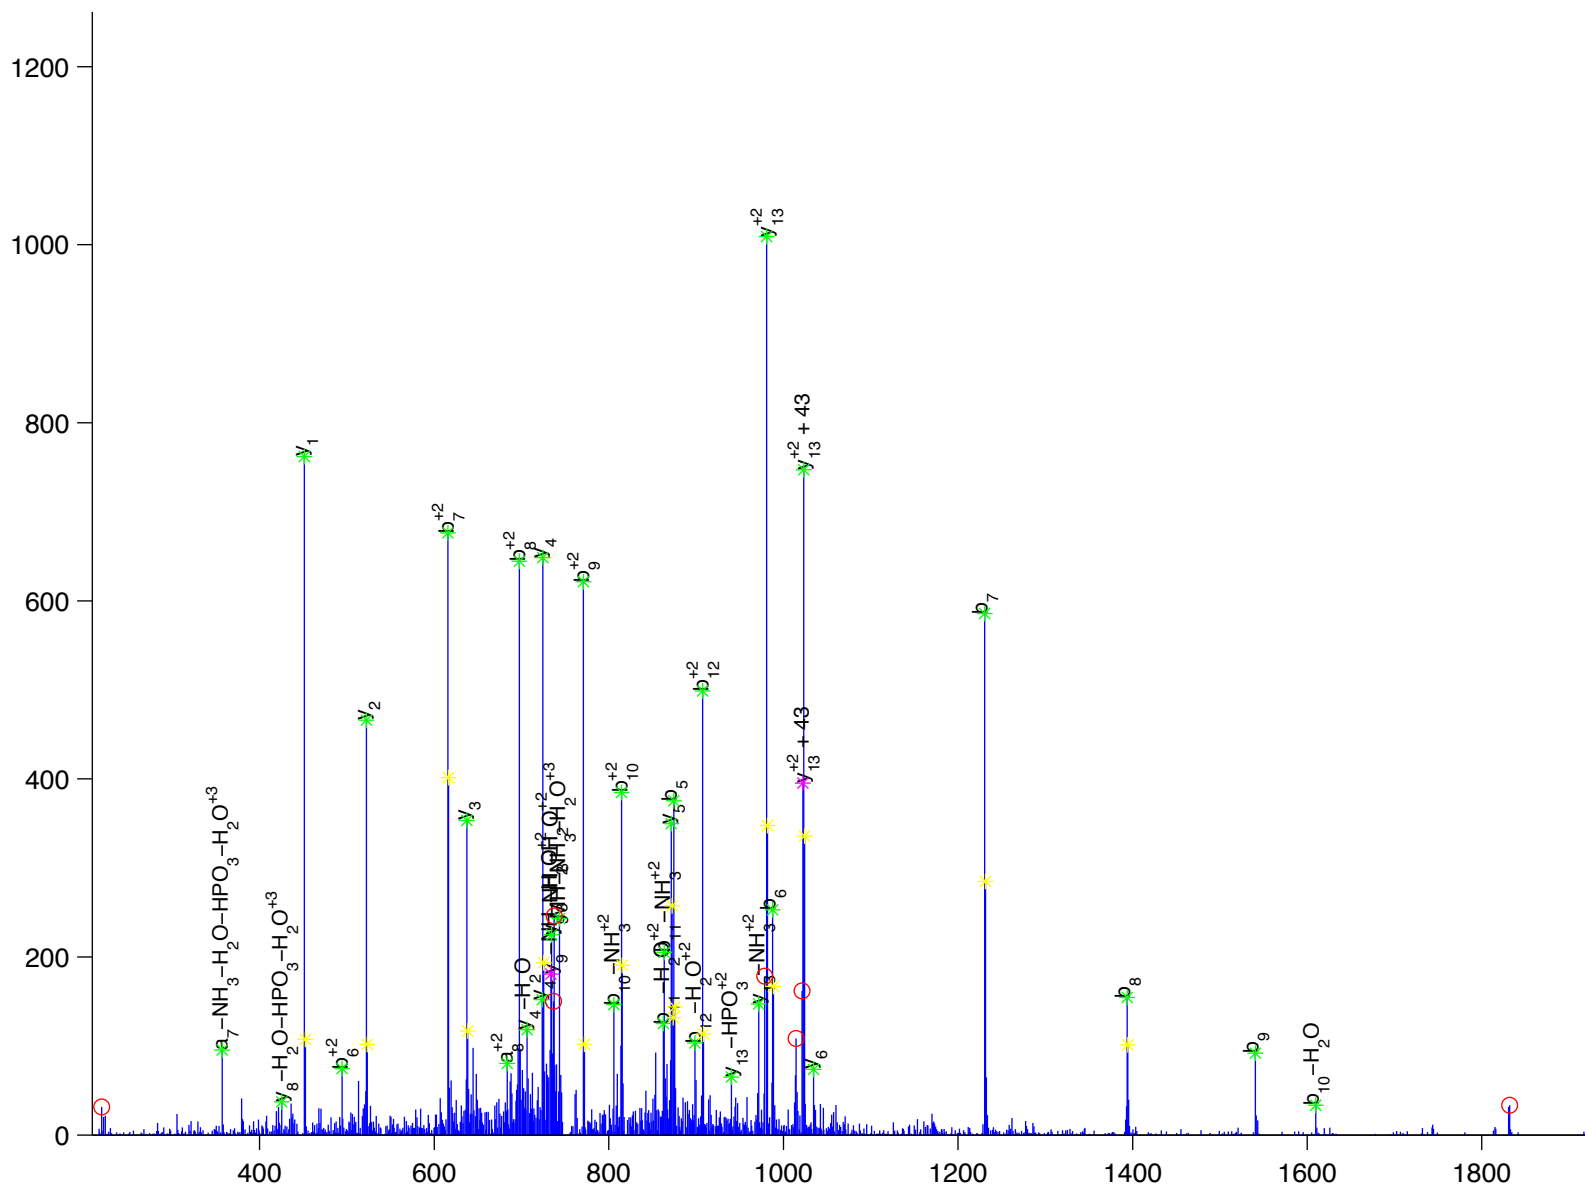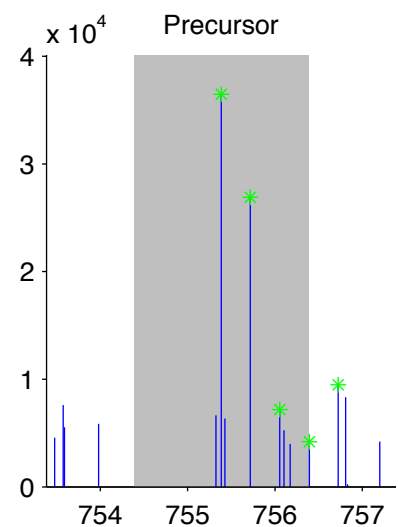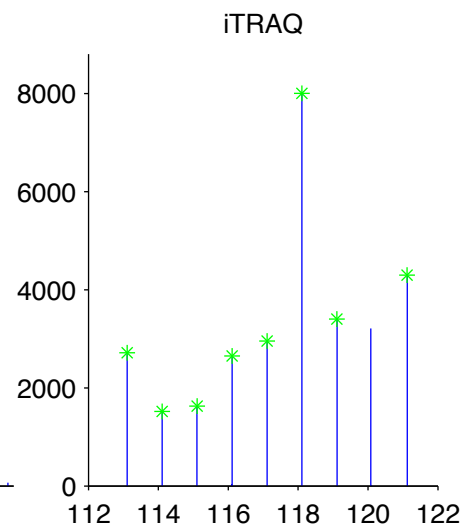



Y [ D ] G [ N ] V [ y ] E [ N ] L [ F ] E [ W ] A [ K ]

acyl-Coenzyme A oxidase 1, palmitoyl

Charge State: +3

Scan Number: 6949

File Name: 090728ptp1blivers\_M\_NC\_ins\_e.raw

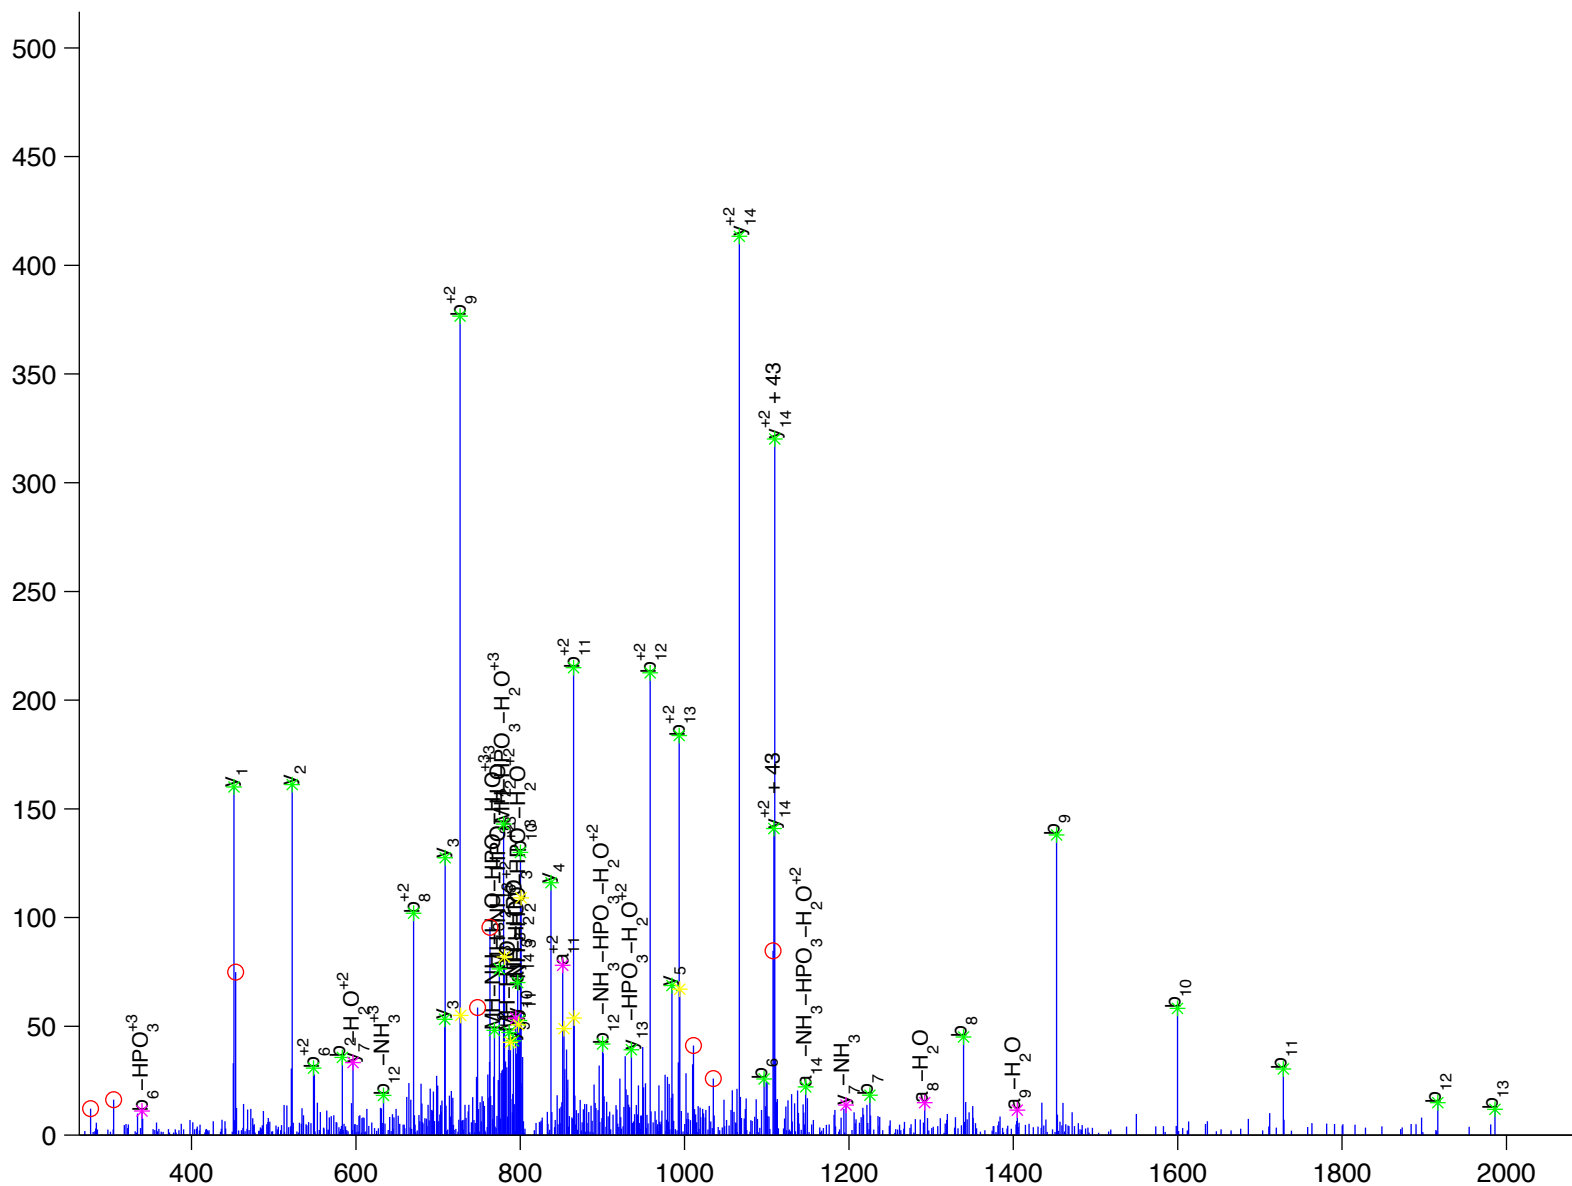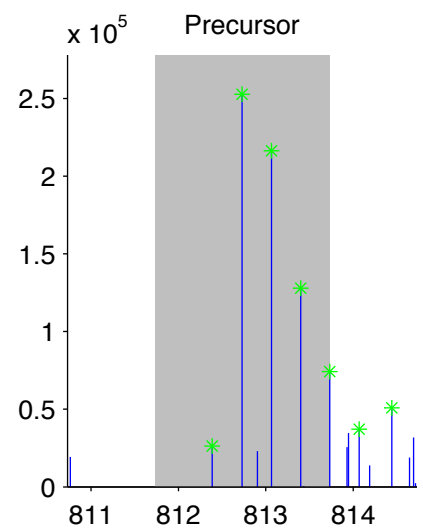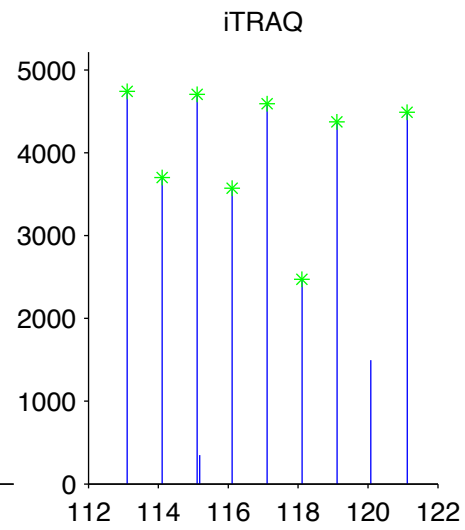



A [ L ] y [ V ] S [ D ] K

aldehyde dehydrogenase 1 family, member L1

Charge State: +3

Scan Number: 4756

File Name: 091130ptp1blivers\_hfd\_basal2.raw

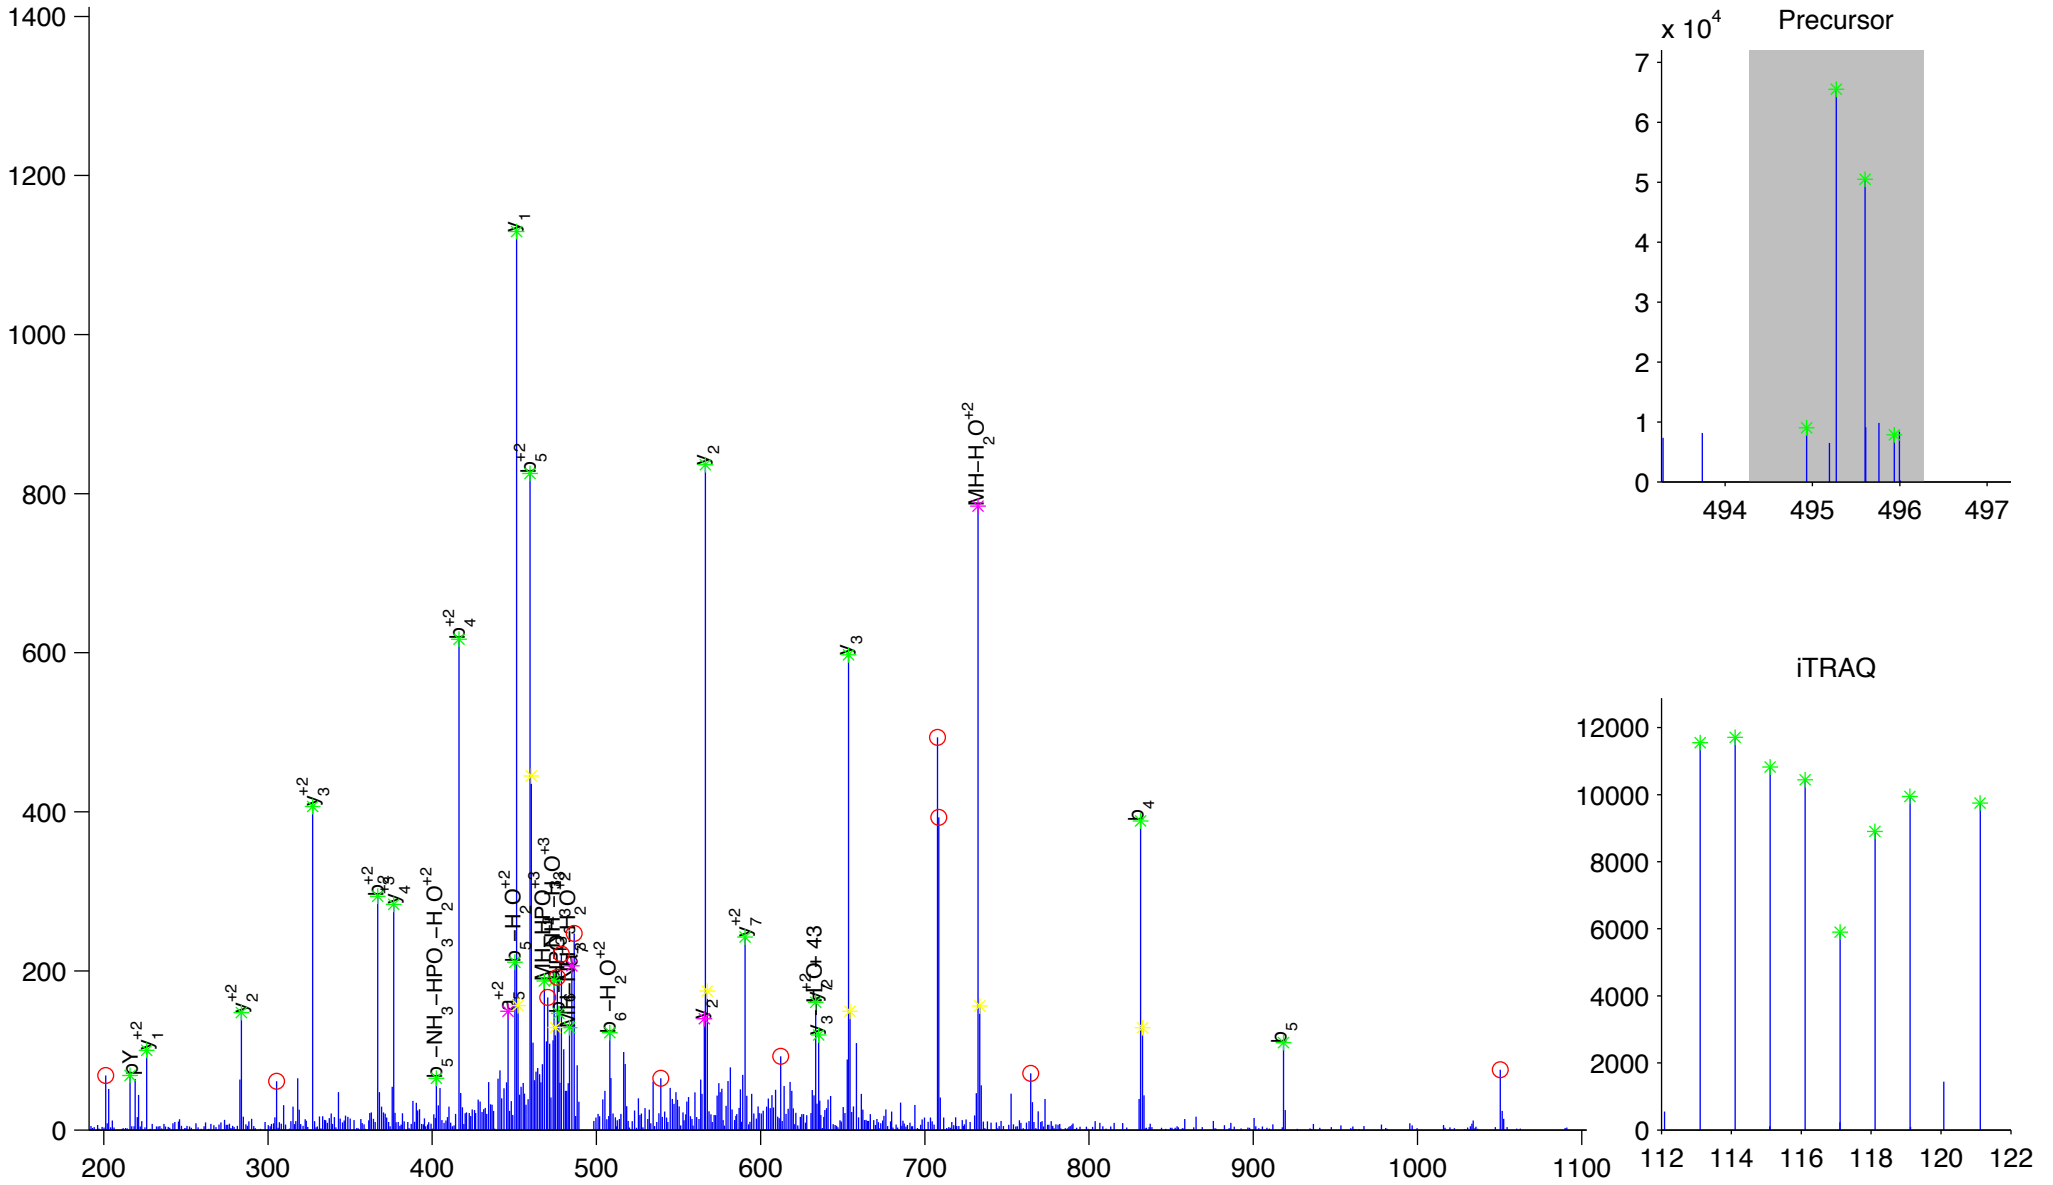



E [ L ] [ G ] [ E ] [ H ] [ G ] [ L ] [ y ] [ E ] [ Y ] [ T ] [ E ] [ L ] [ K ]

aldehyde dehydrogenase family 1, subfamily A7

Charge State: +3

Scan Number: 1325

File Name: HJ072909\_HFD\_E1\_2.raw

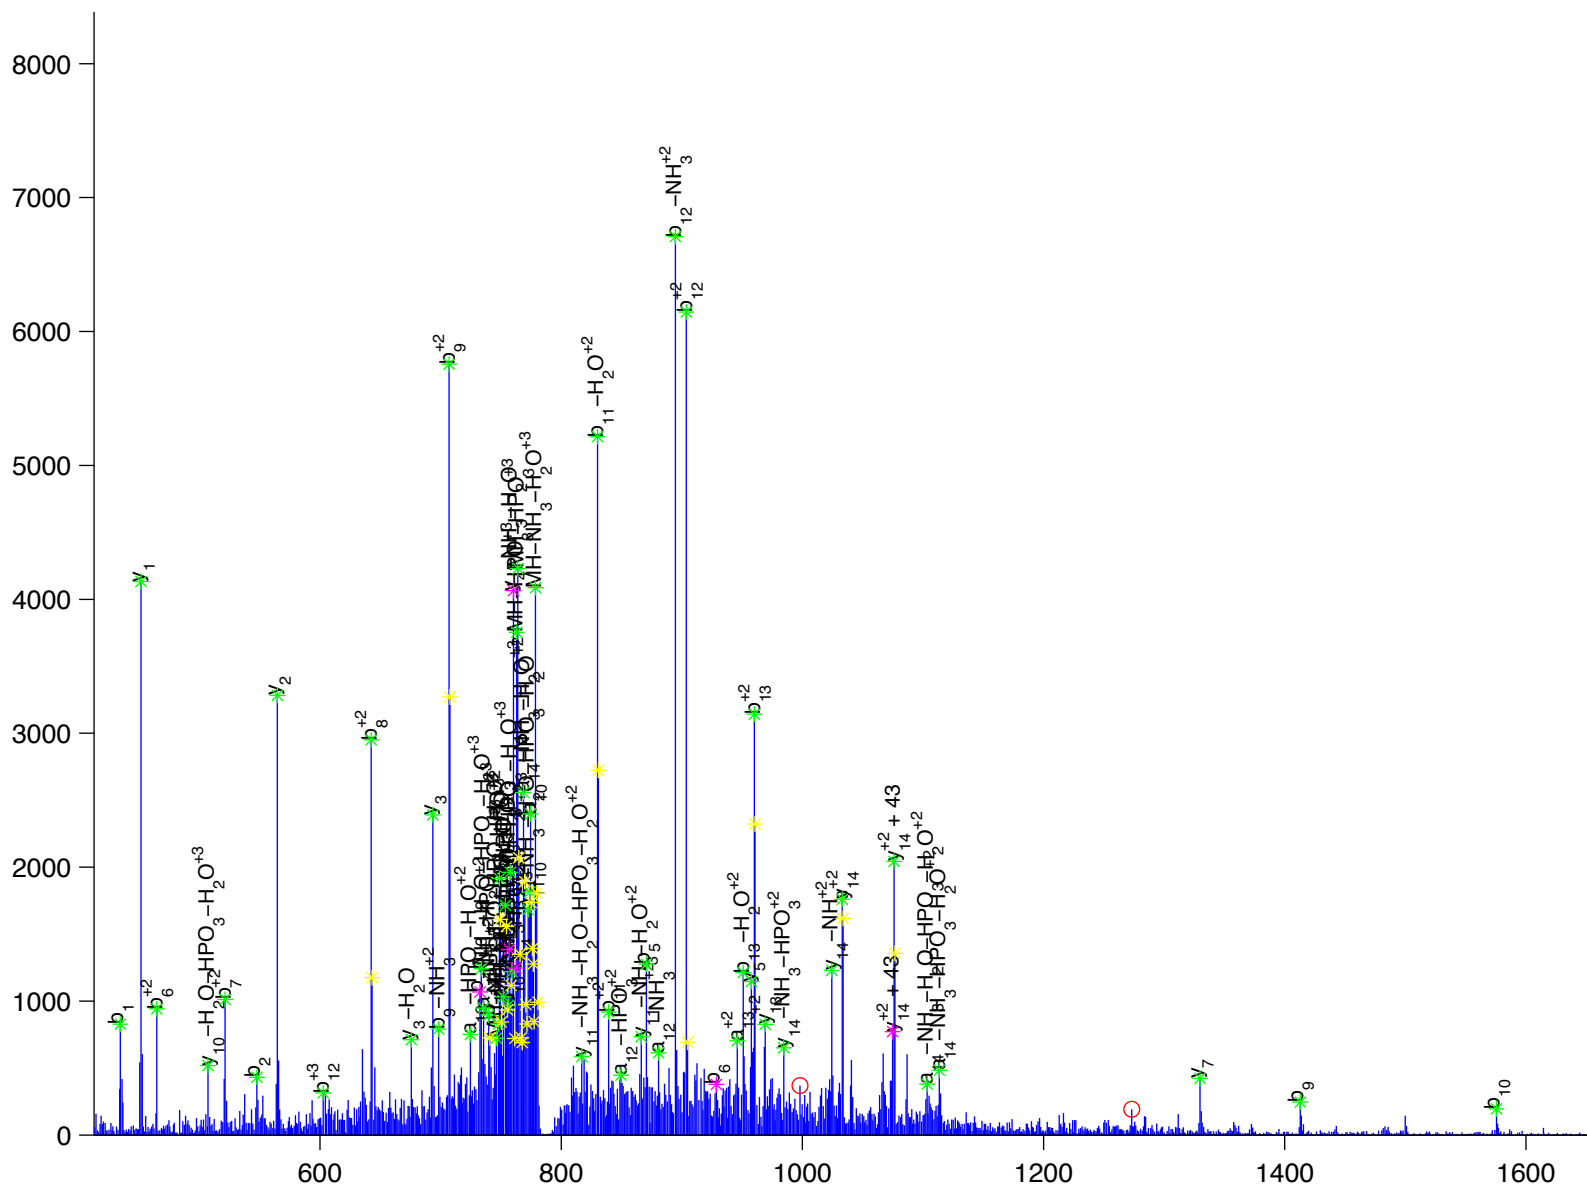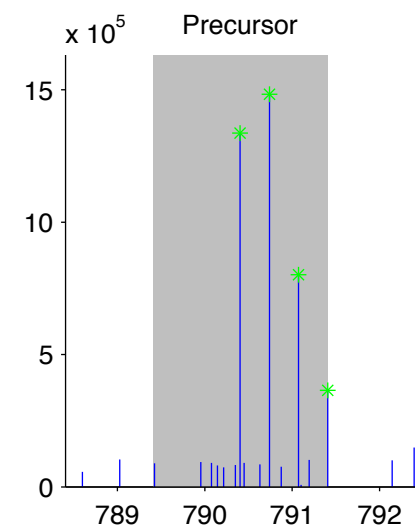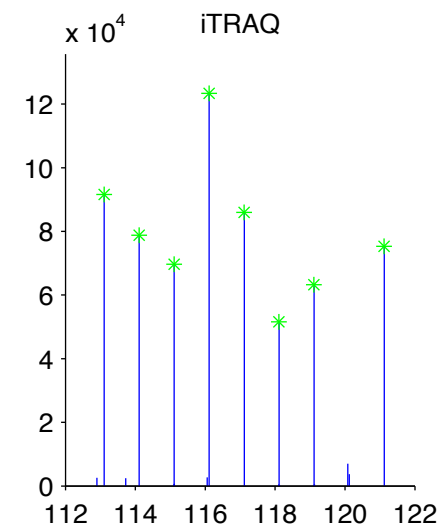

A I S F V G S N Q A G E y I F E R

aldehyde dehydrogenase family 6, subfamily A1

Charge State: +3

Scan Number: 8779

File Name: 090806ptp1blivers\_M\_NC2.raw

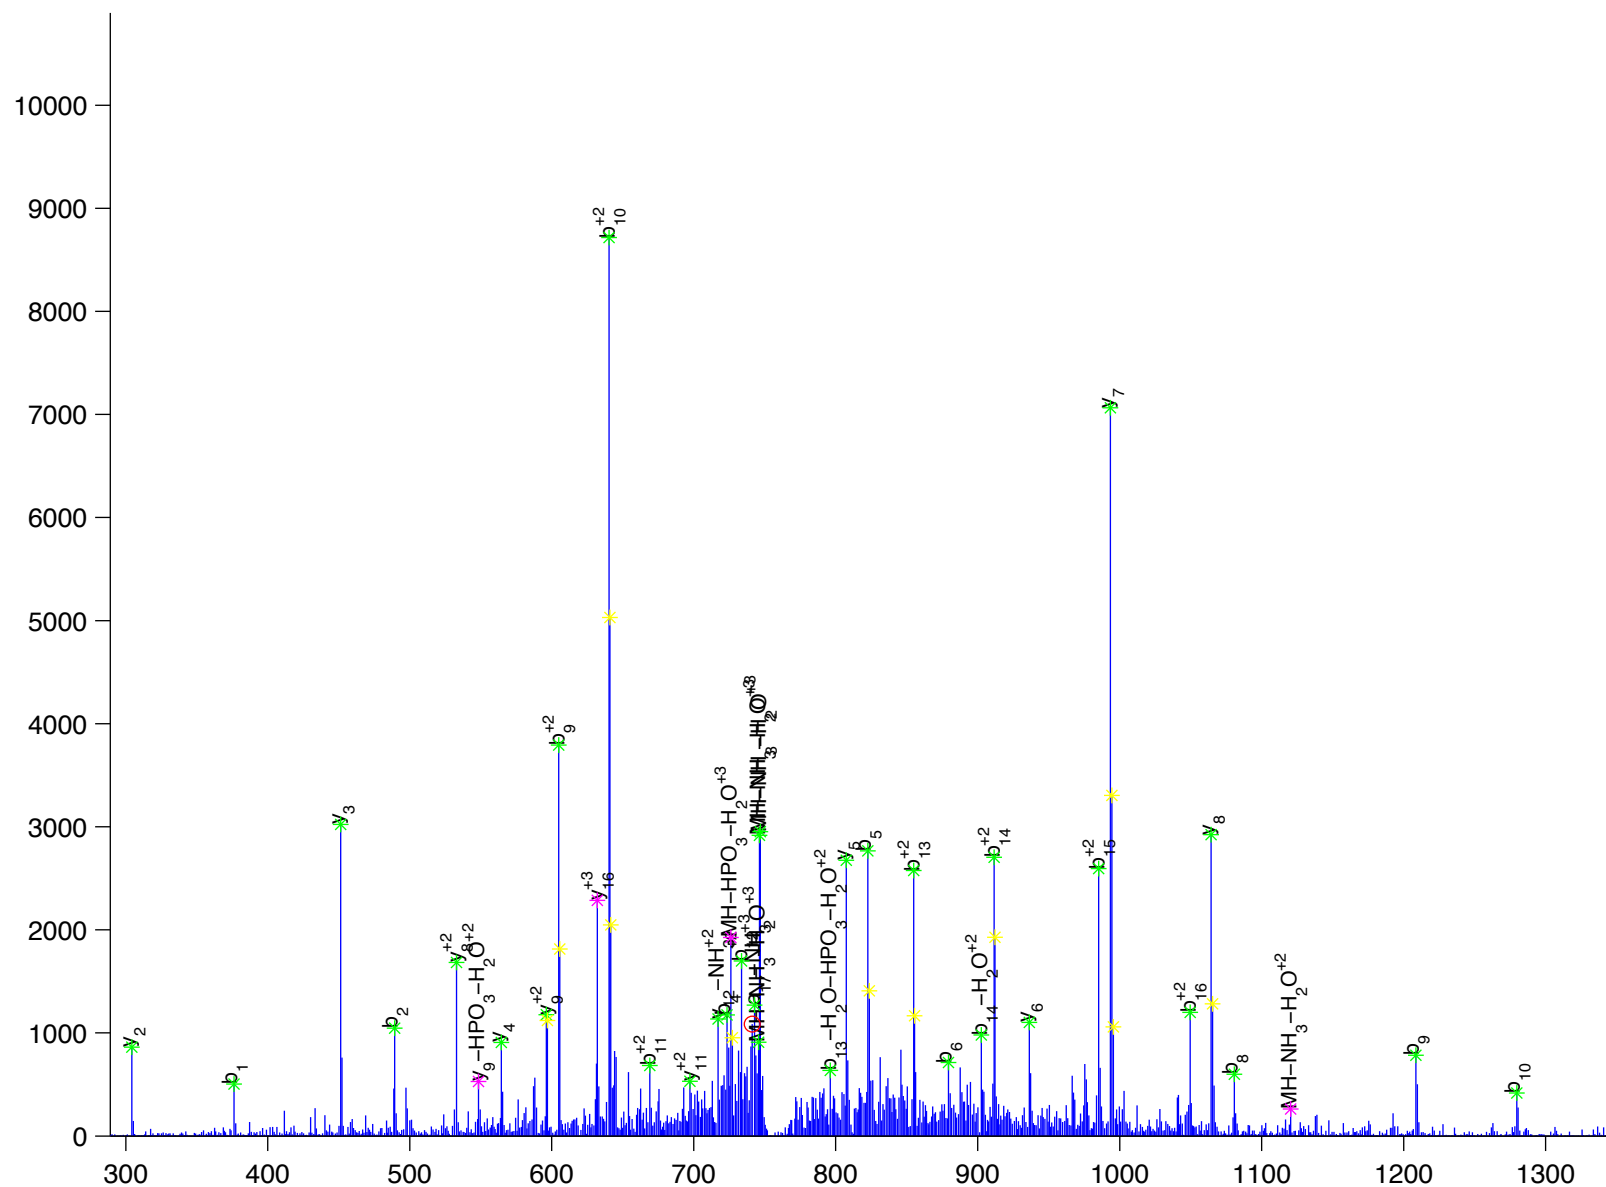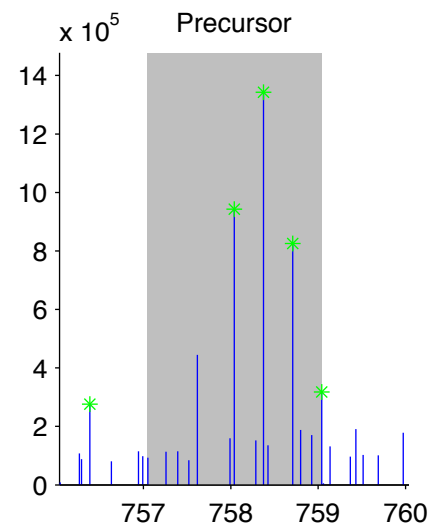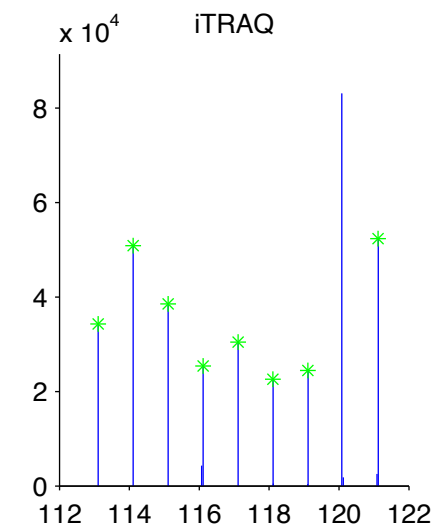

Y[A]S[I]C[Q]Q[N]G[L]V[P]I[V]E[P]E[V]L[P]D[G]D[H]D[L]E[H]C[Q]y[V]S[E]K

aldolase 2, B isoform

Charge State: +4

Scan Number: 6247

File Name: 090728ptp1blivers\_M\_NC\_ins\_e.raw

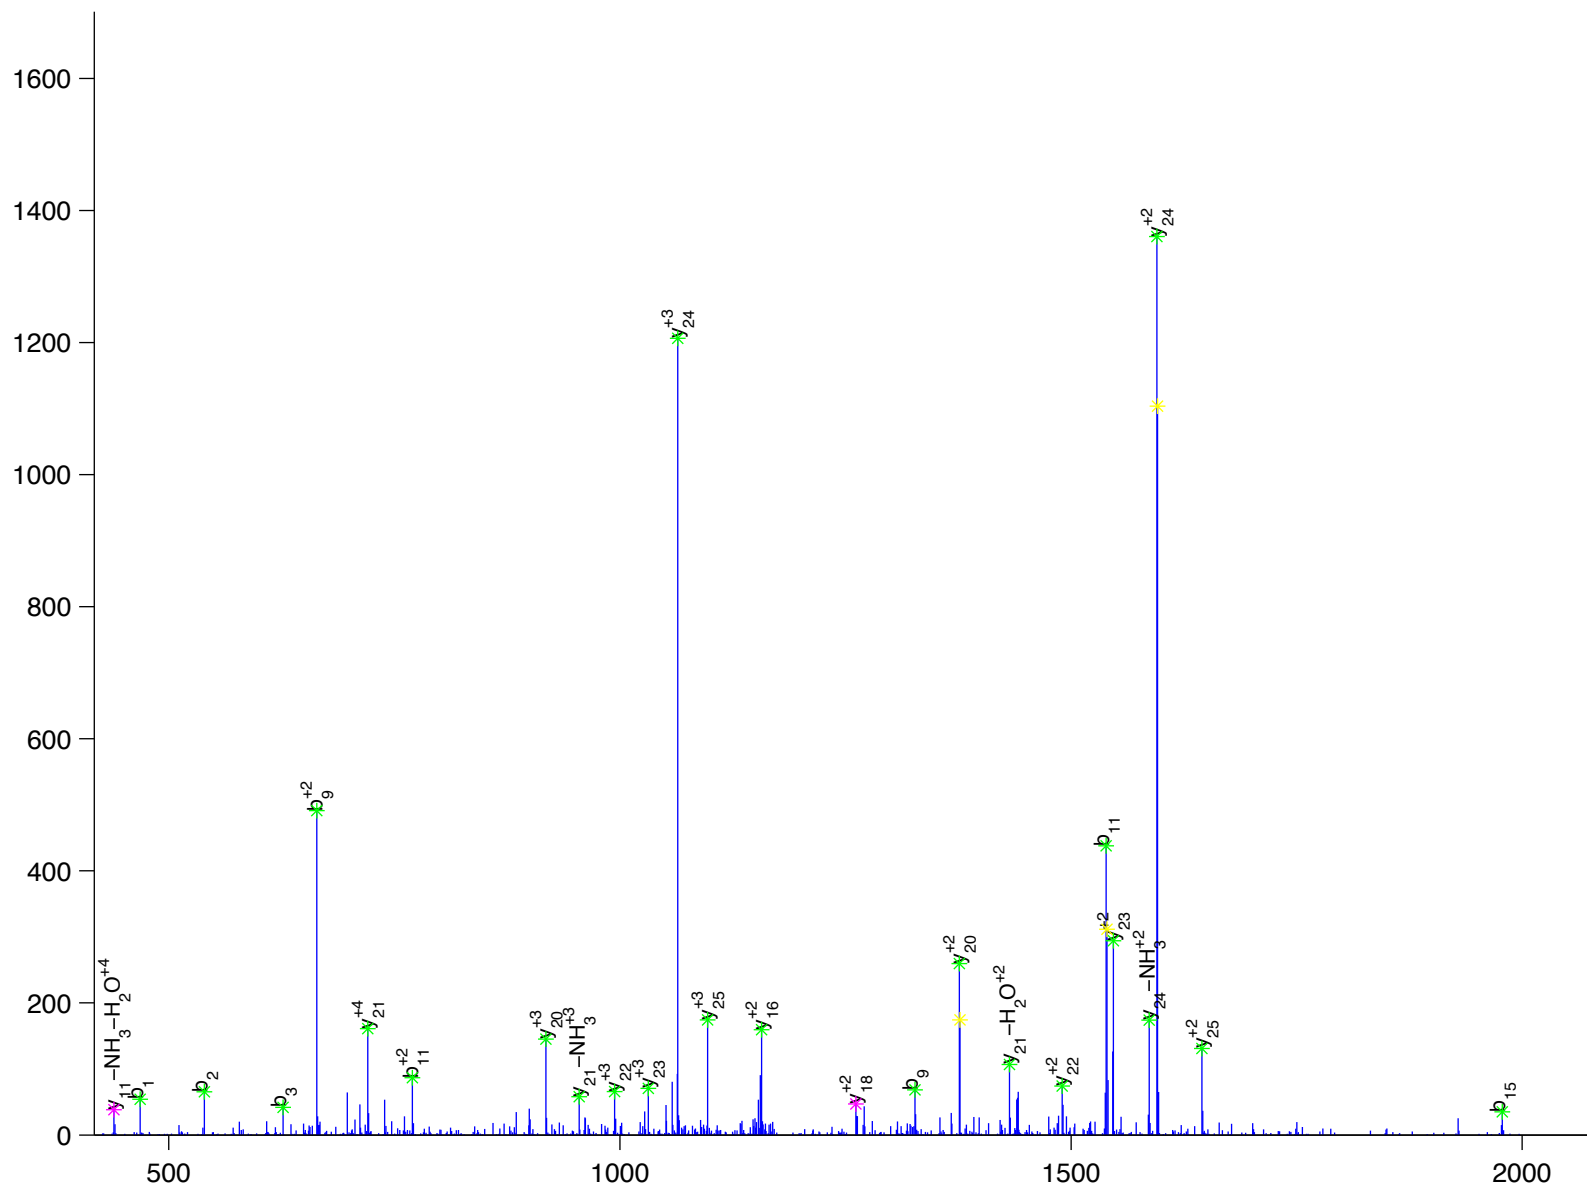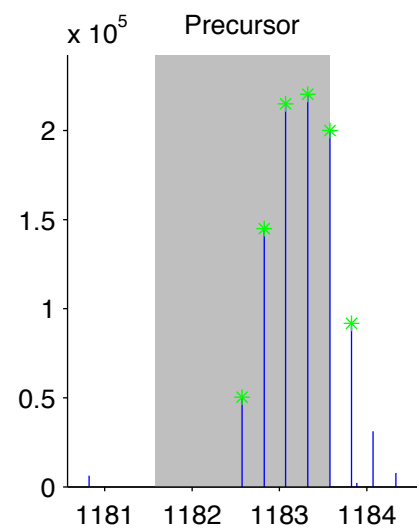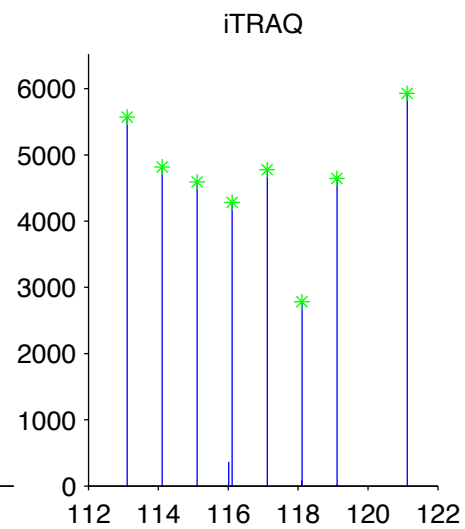

I [ Q ] S [ S ] A [ P ] Q [ E ] E [ E ] E [ H ] P [ y ] E [ L ] L [ L ] T [ A ] E [ T ] K

ankyrin repeat and sterile alpha motif domain containing 1

Charge State: +4

Scan Number: 5558

File Name: 090728ptp1blivers\_M\_NC\_ins\_e.raw

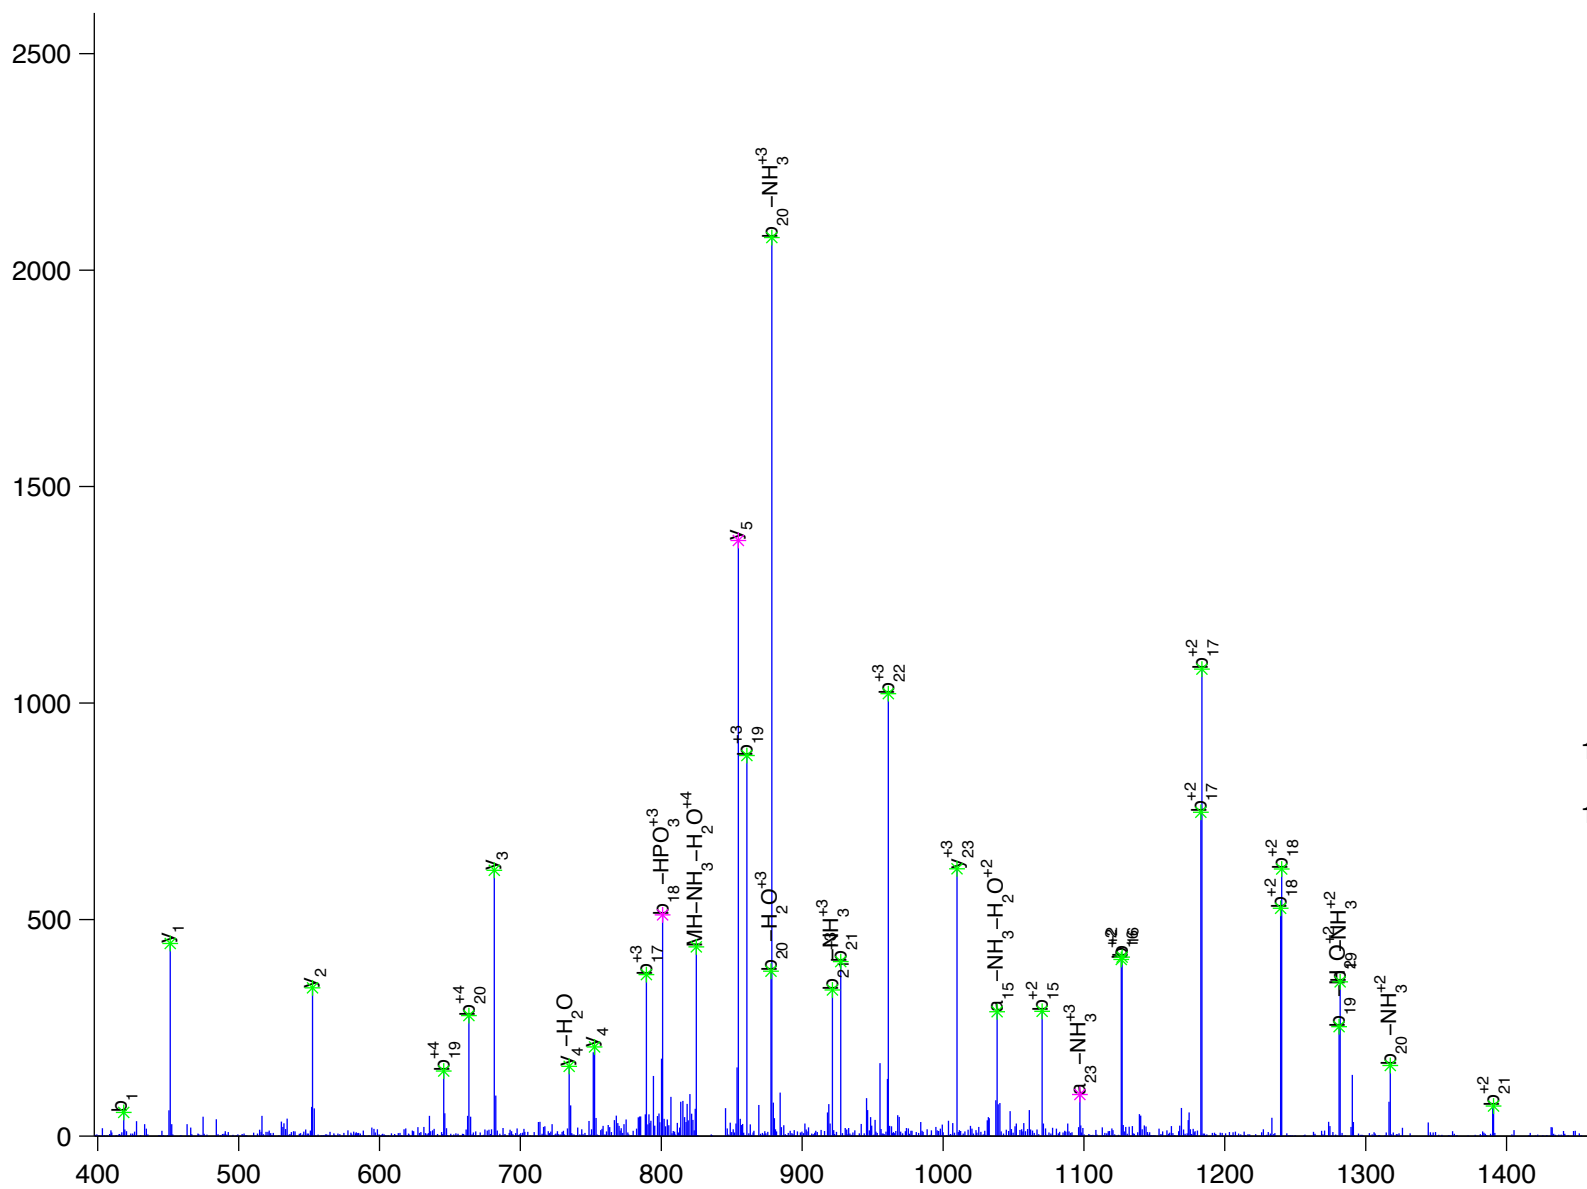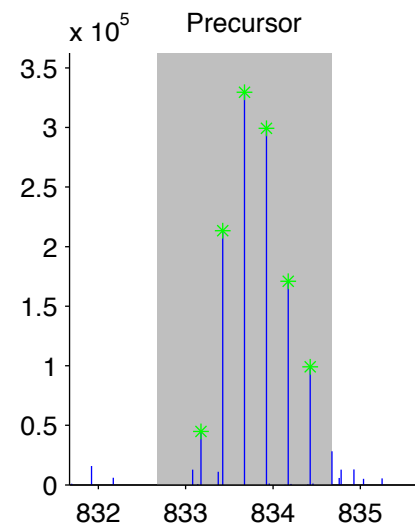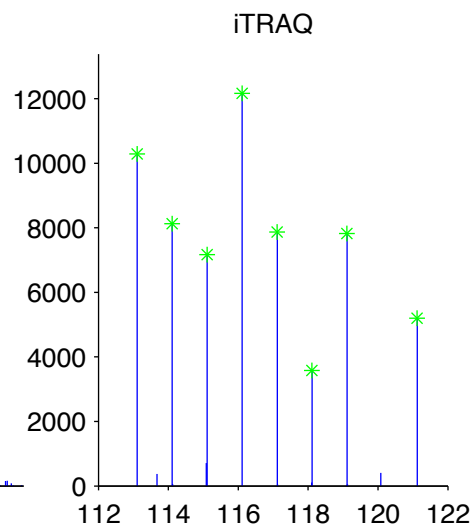

L[S]L[E]G[D]H[S]T[P]P[S]A]y[G]S[V]K[P]Y]T]N]F]D]A]E]R

annexin A2  
 Charge State: +4  
 Scan Number: 5690  
 File Name: 091130ptp1blivers\_hfd\_basal2.raw

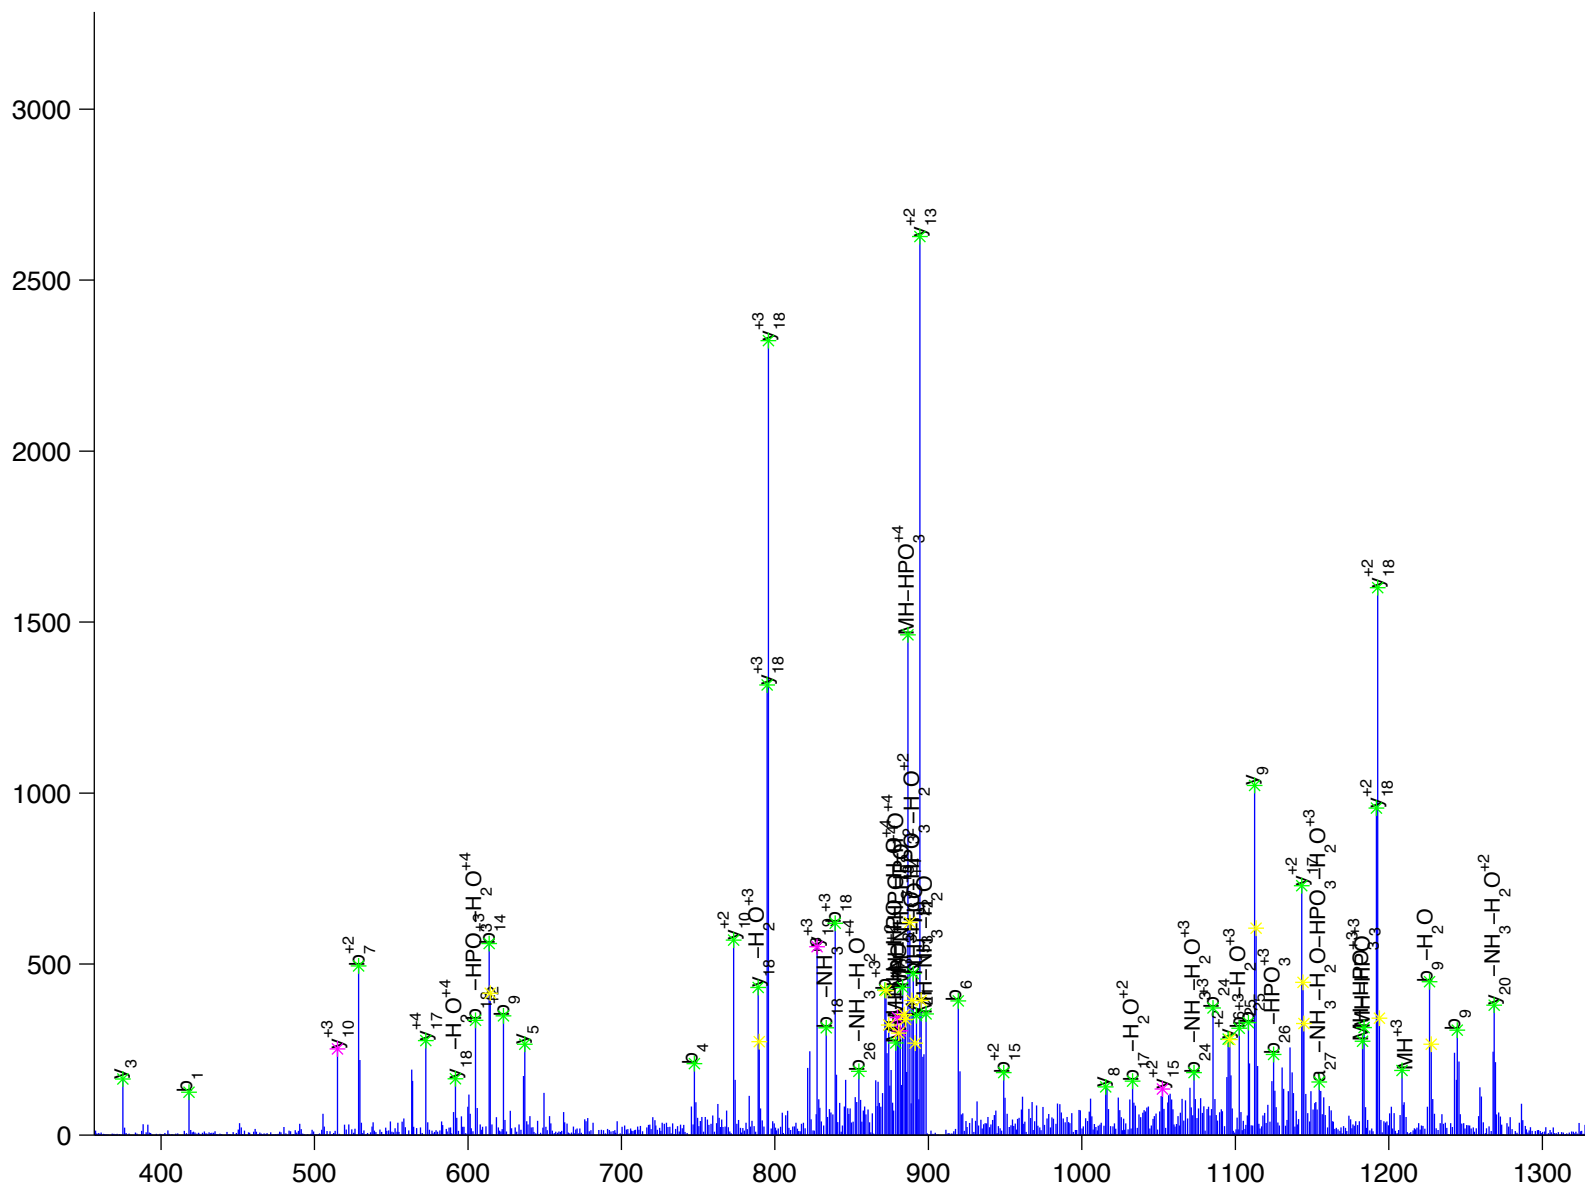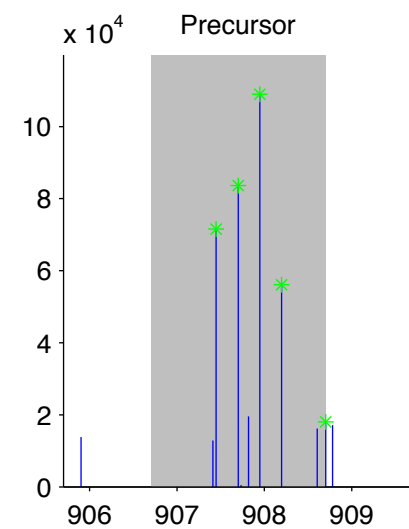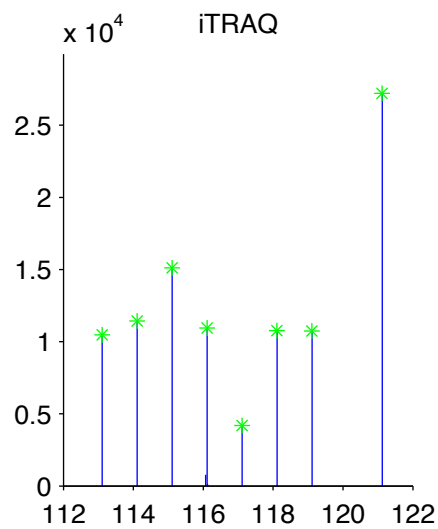

y [ F ] [ S ] [ M ] [ T ] [ E ] [ V ] [ D ] K

arginase 1, liver

Charge State: +2

Scan Number: 4689

File Name: 090728ptp1blivers\_M\_NC\_ins\_e.raw

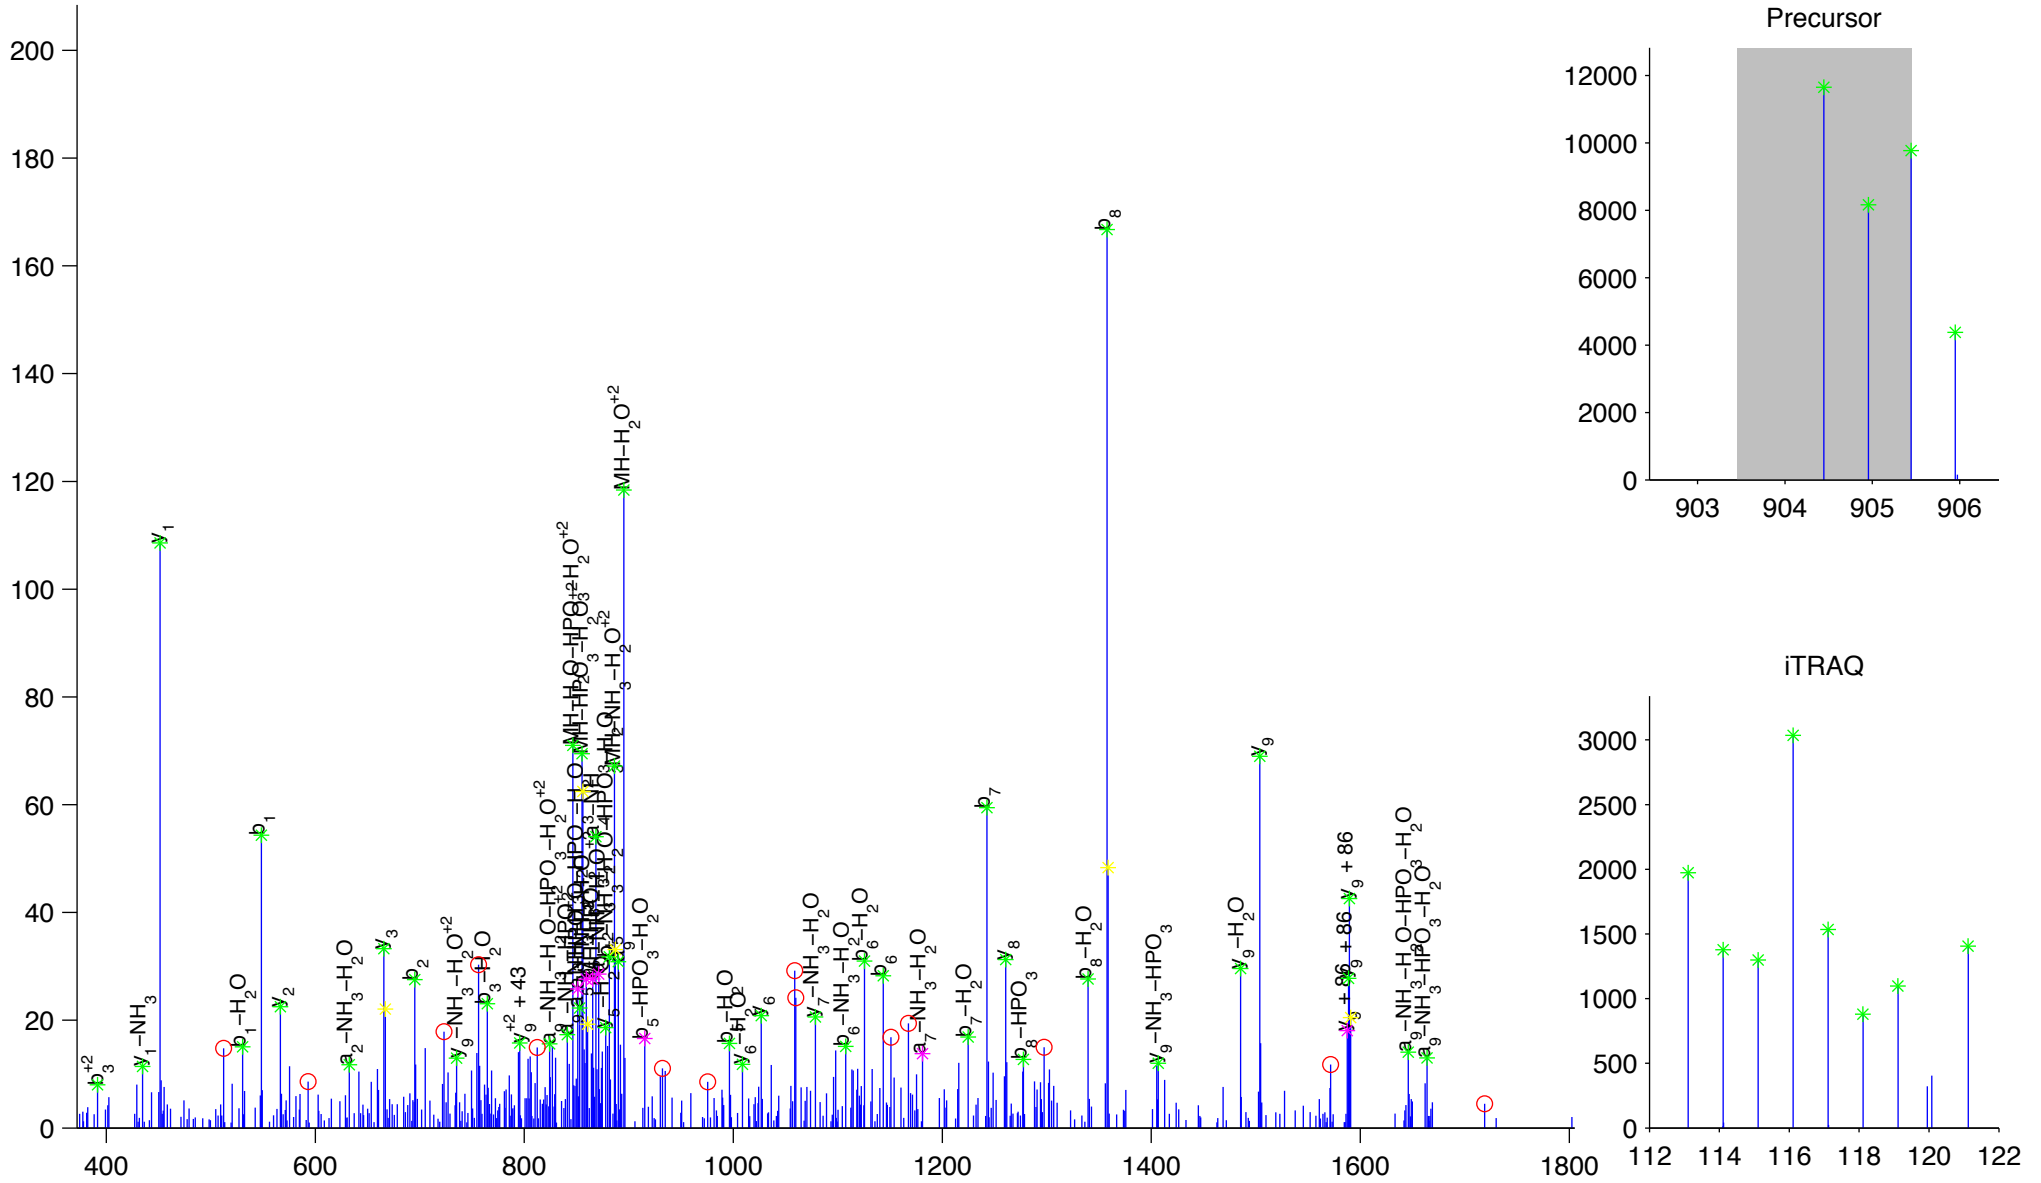



V[M]E[E]T[F]S[y]L[L]G[R]

arginase 1, liver

Charge State: +3

Scan Number: 4887

File Name: HJ072909\_HFD\_E1\_2.raw

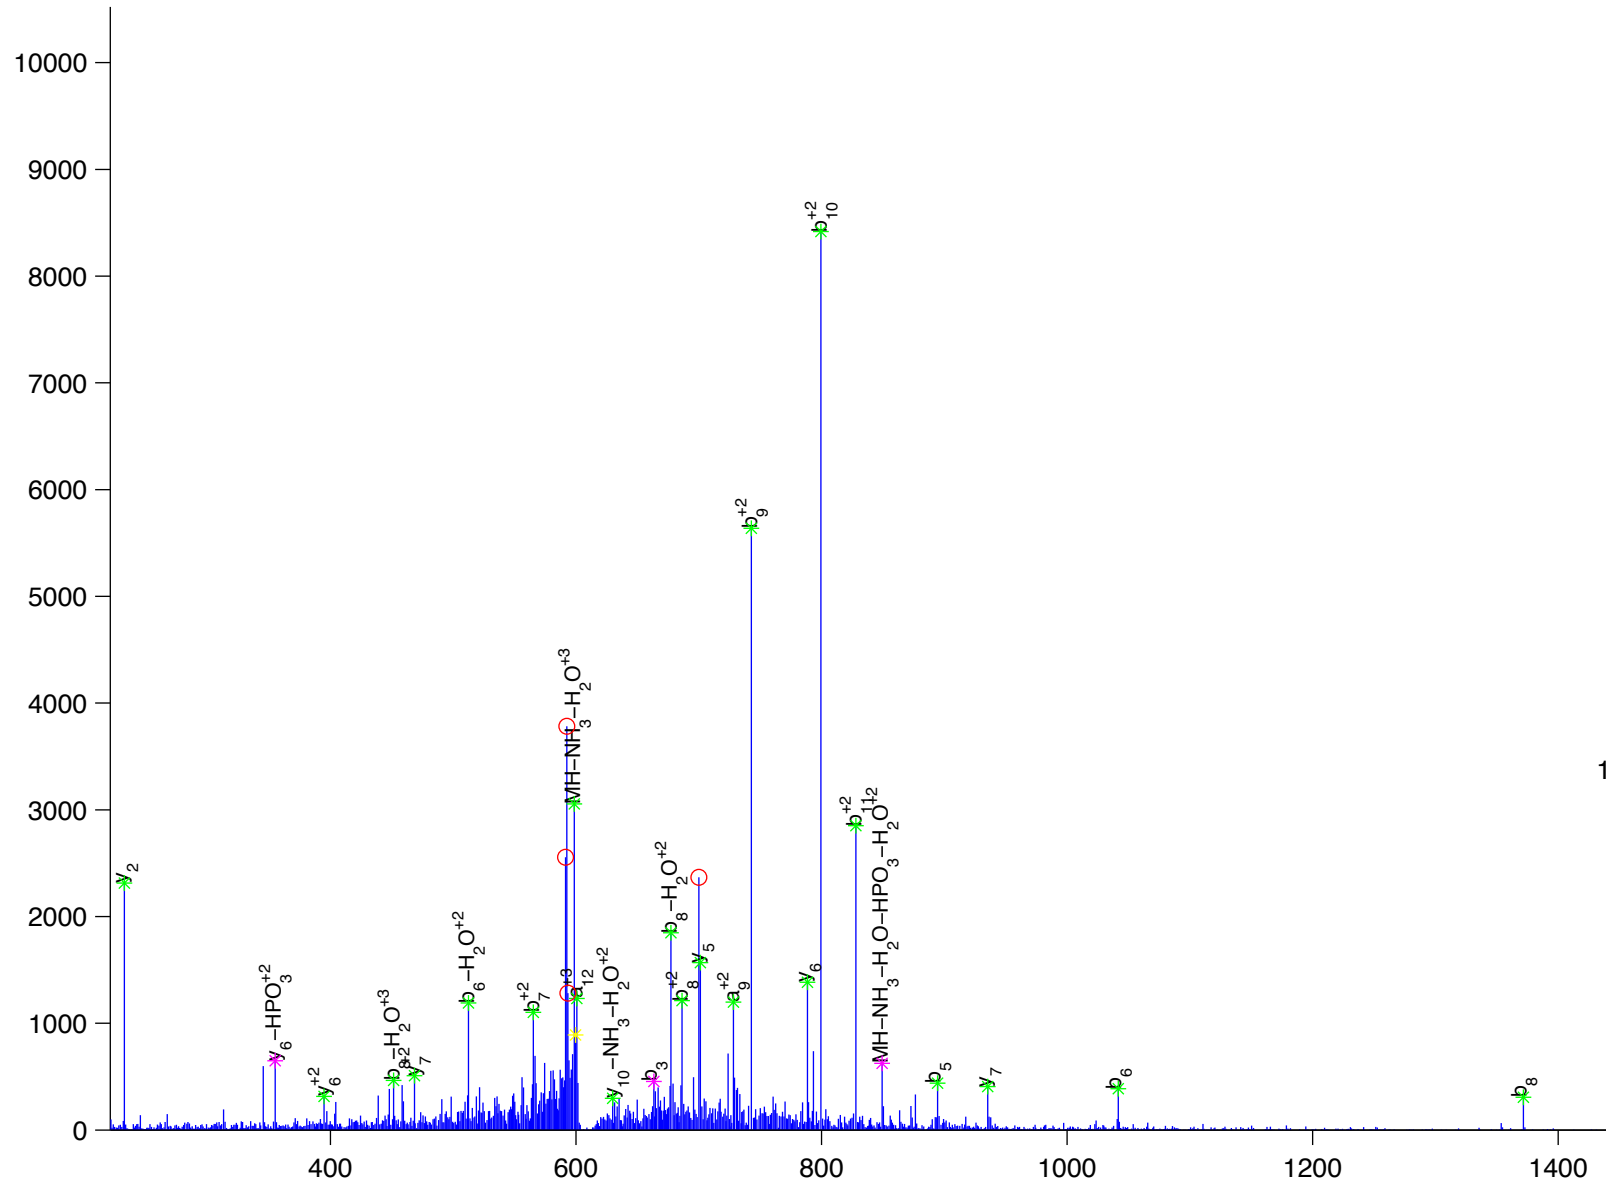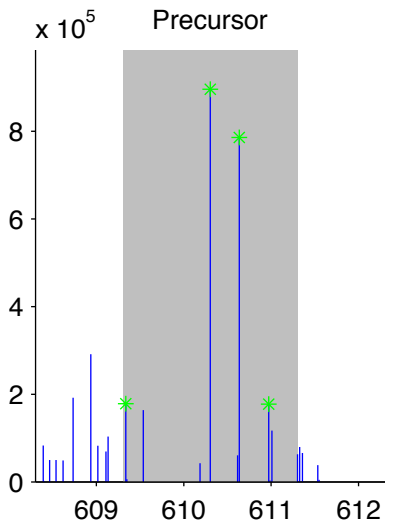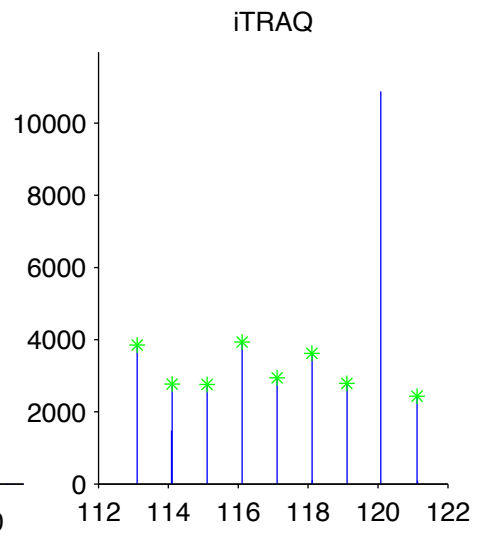



E [ G ] L [ Y ] I [ T ] E [ E ] I [ y ] K

arginase 1, liver

Charge State: +3

Scan Number: 6911

File Name: 091130ptp1blivers\_hfd\_basal2.raw

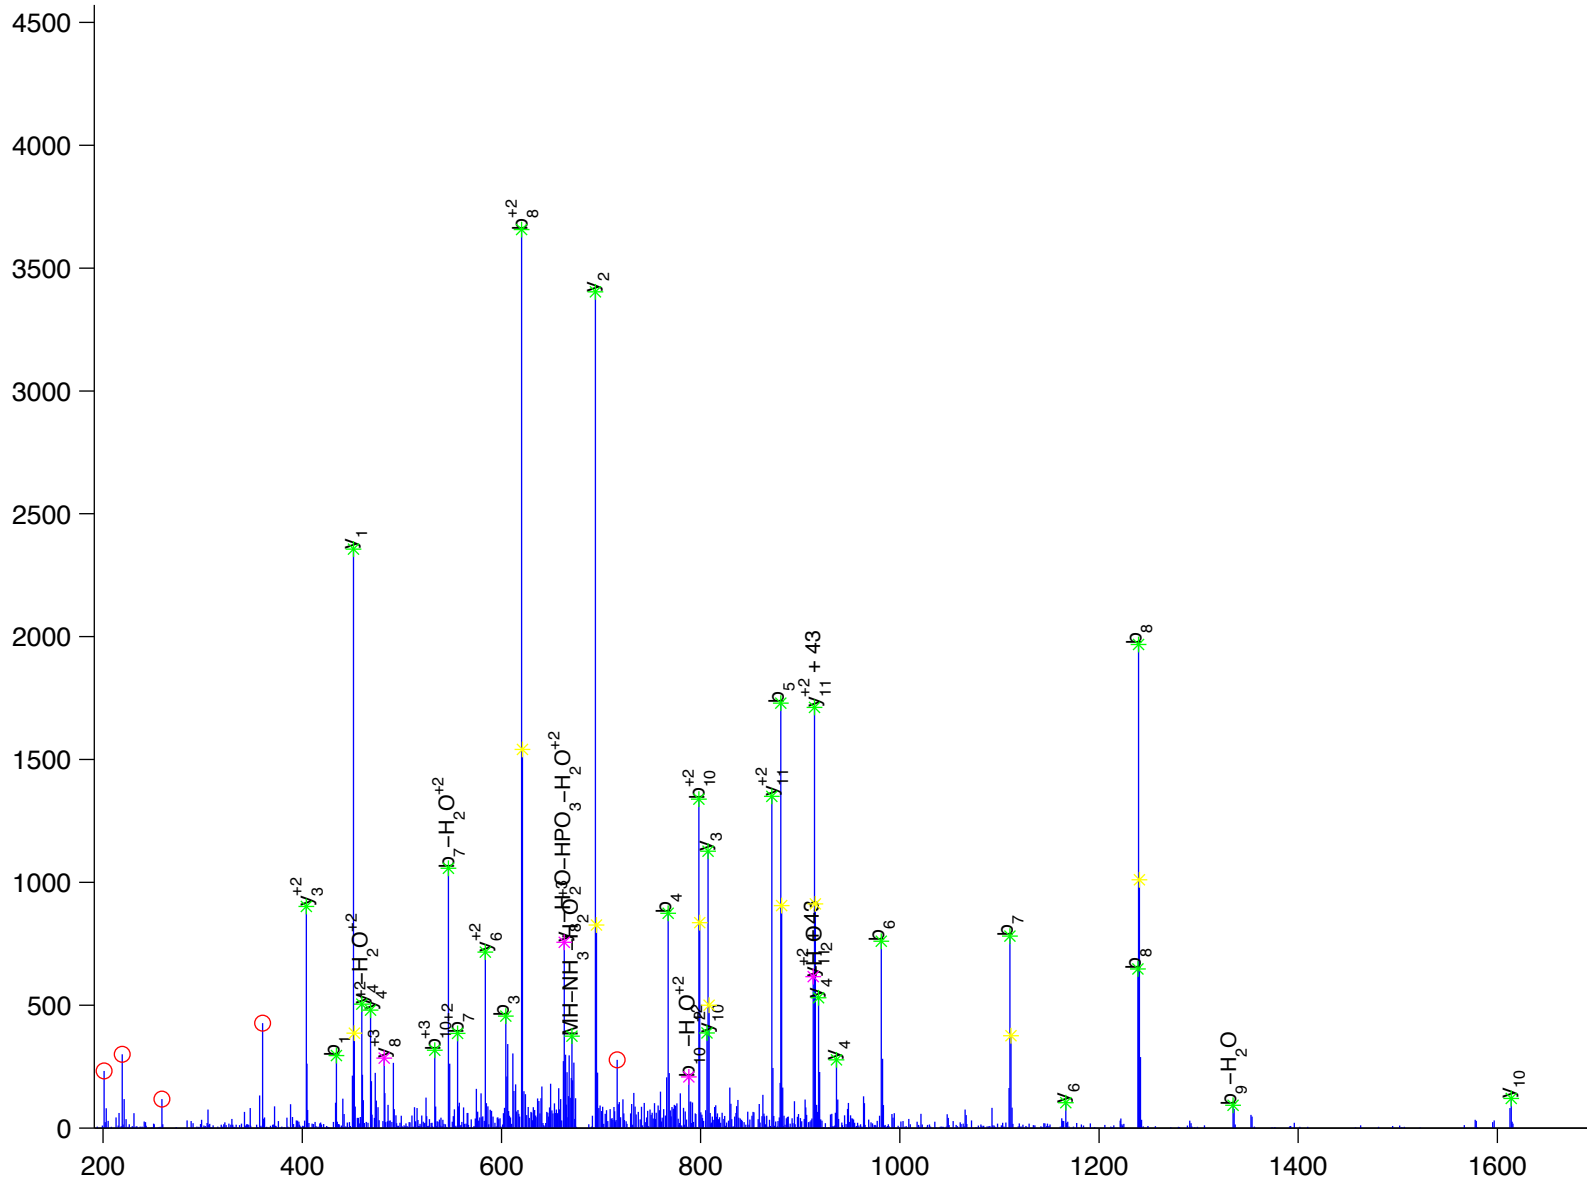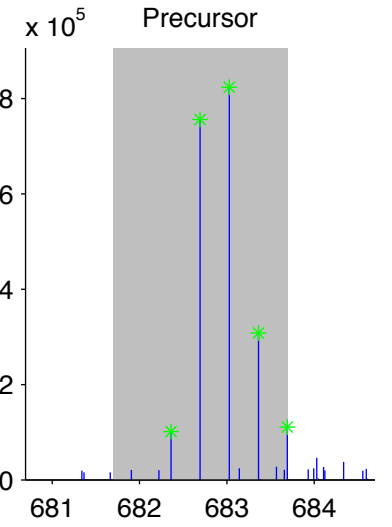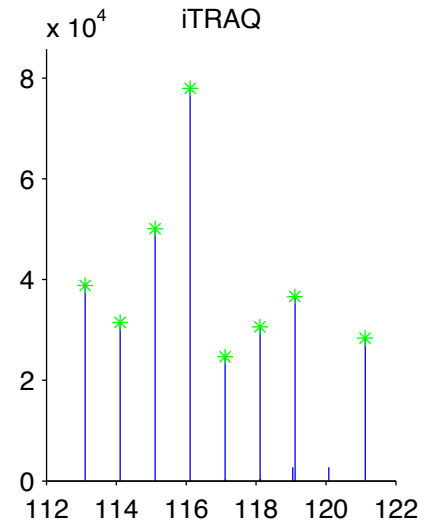





F [ E ] L [ T ] C [ y ] S [ L ] A [ P ] Q [ I ] K

argininosuccinate synthetase

Charge State: +3

Scan Number: 8692

File Name: 090806ptp1blivers\_M\_NC2.raw

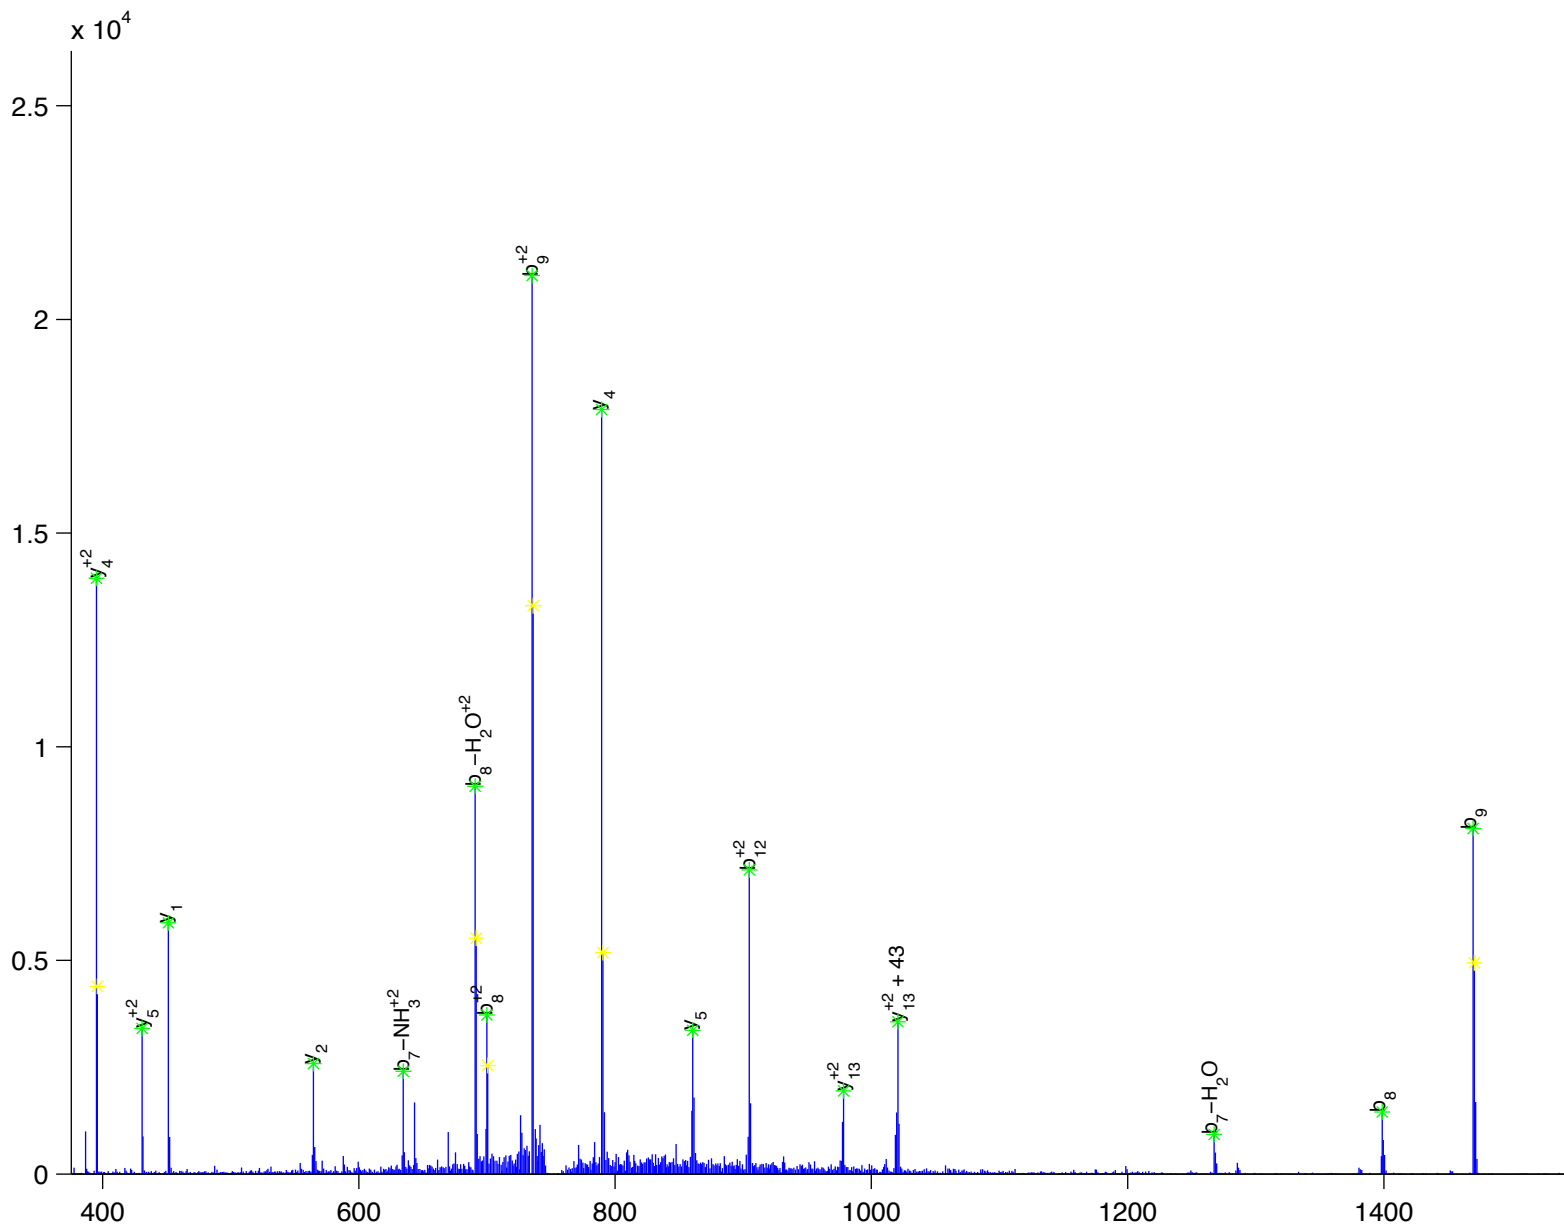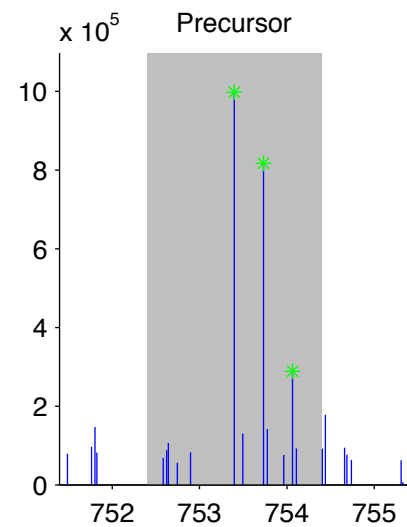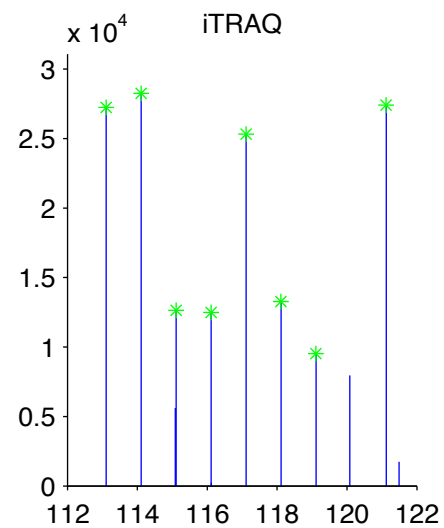

T  
T D G V y E G V A I G G D R

ATP citrate lyase

Charge State: +3

Scan Number: 3360

File Name: 100827ptp1blivers\_ncHFD\_basal.raw

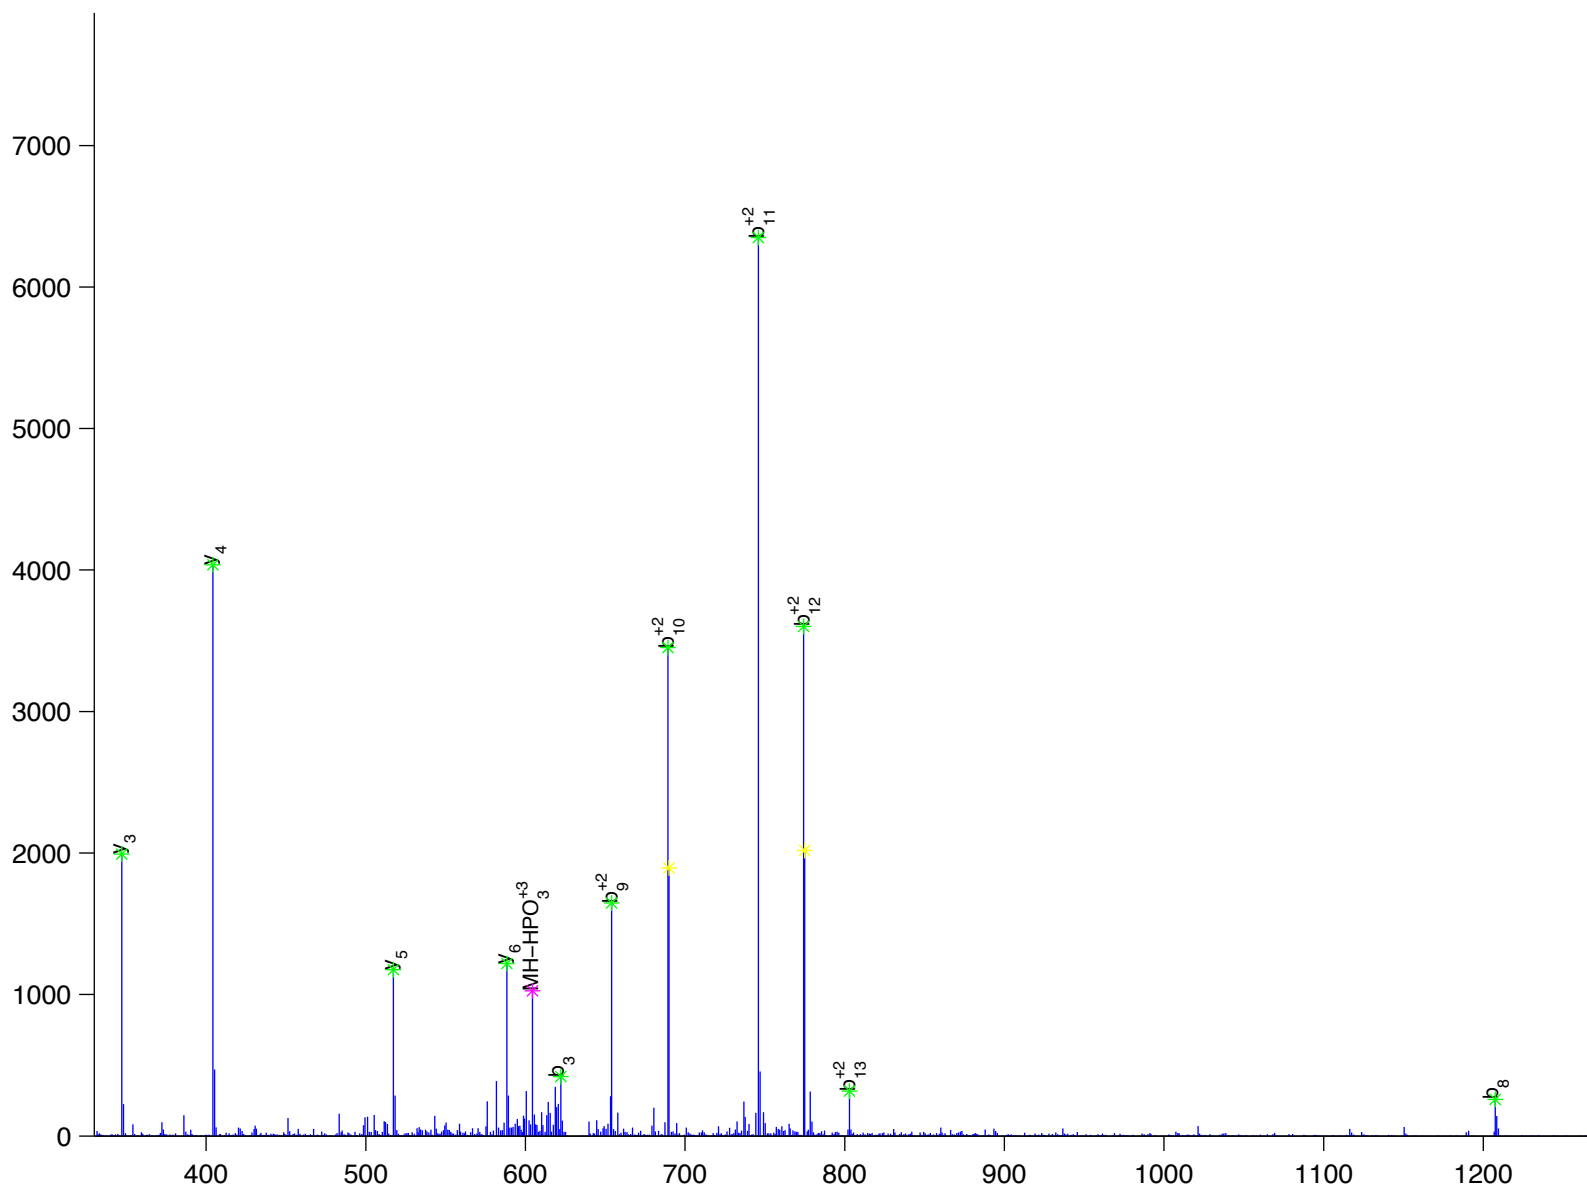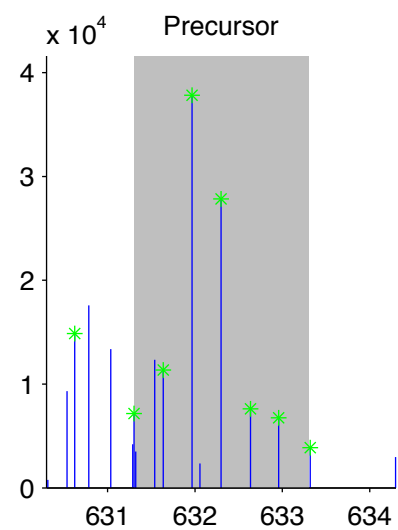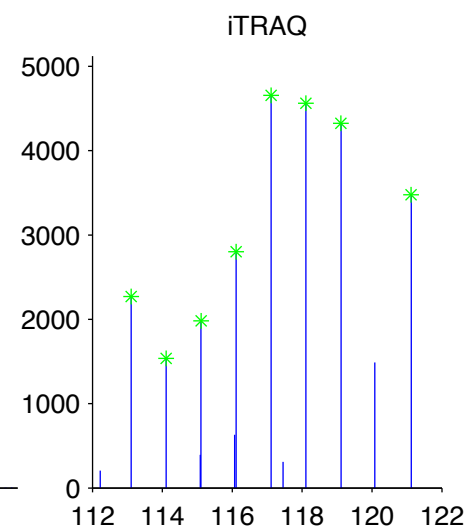

T T D G V y E G V A I G G D R Y P G S T F M D H V L R

ATP citrate lyase

Charge State: +4

Scan Number: 7213

File Name: 091130ptp1blivers\_hfd\_basal2.raw

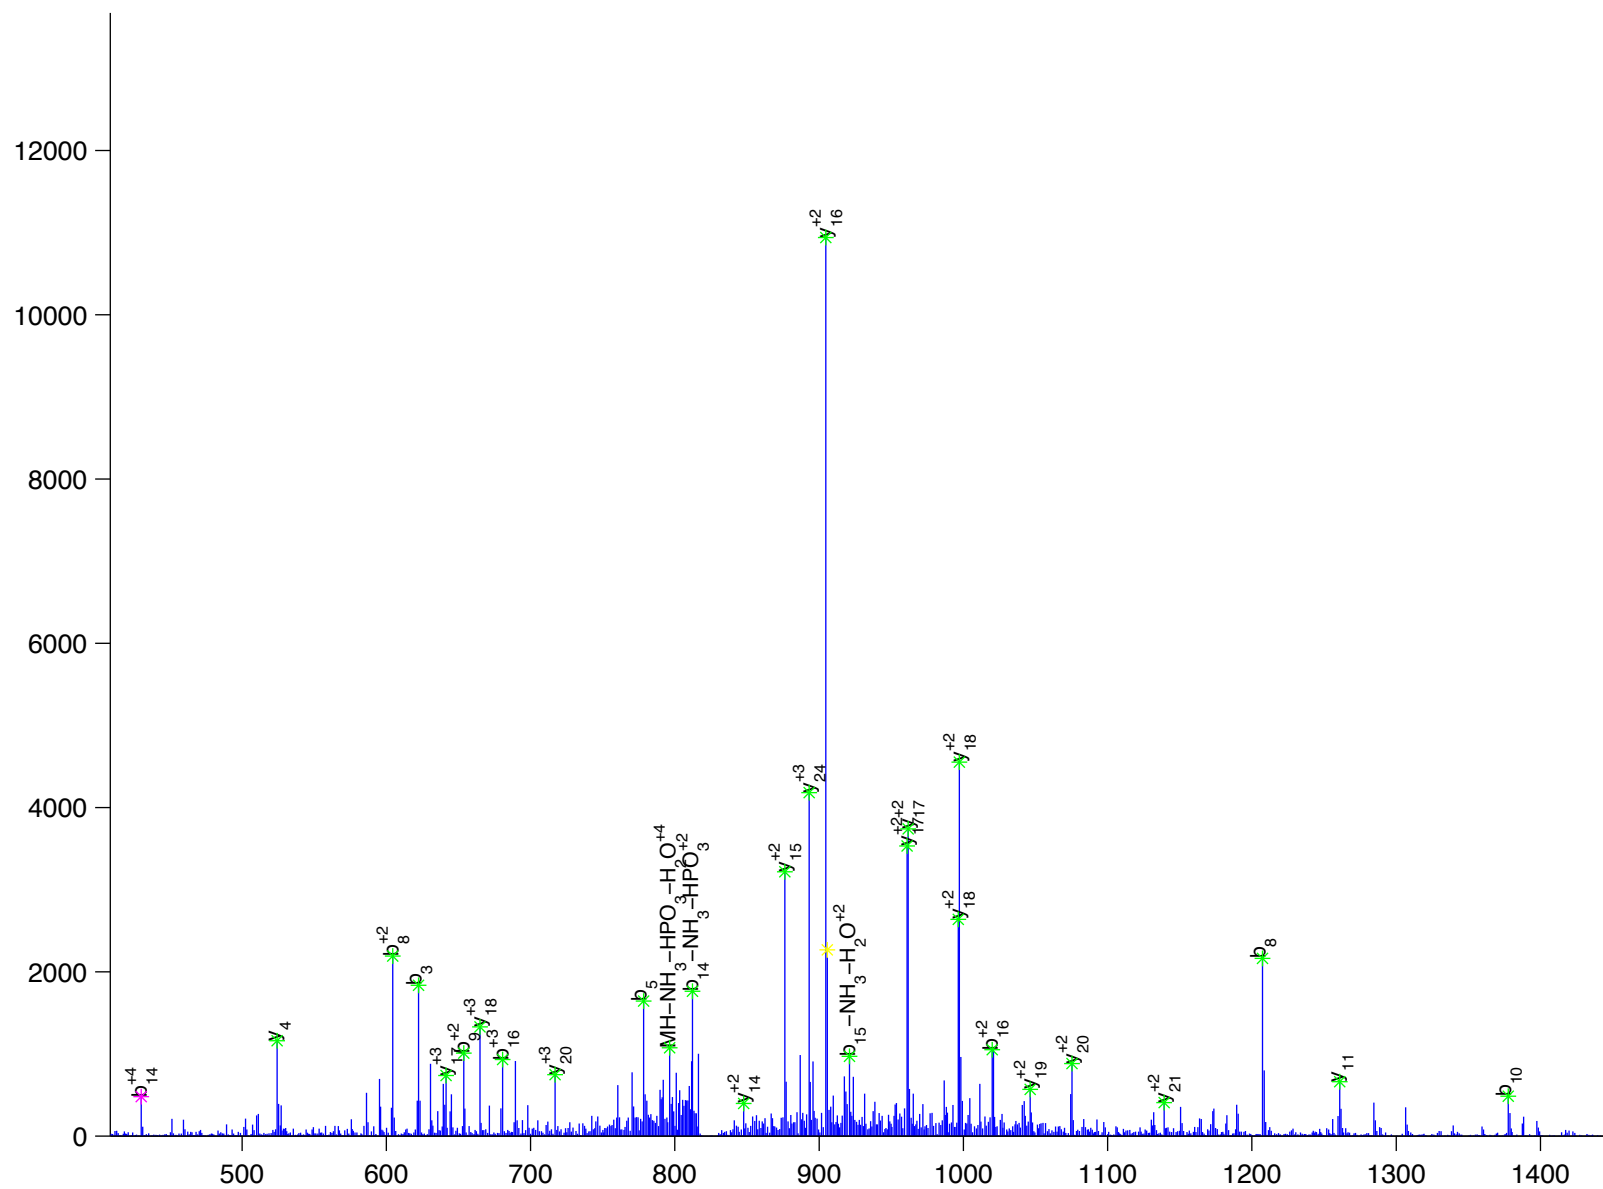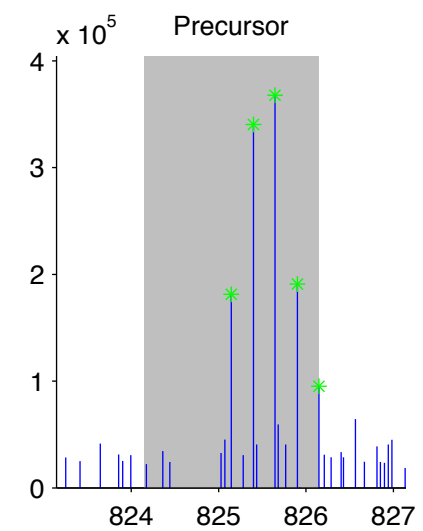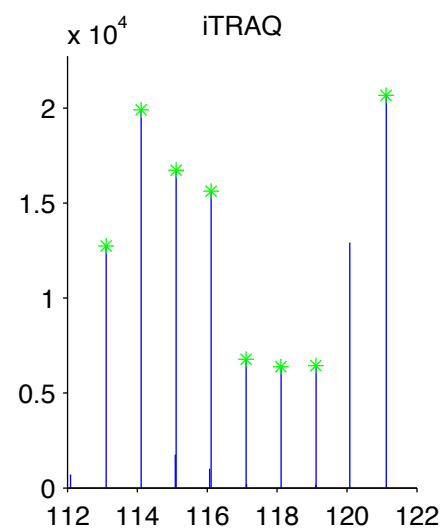



I [Y] [N] [G] [D] [Y] [y] R

AXL receptor tyrosine kinase

Charge State: +2

Scan Number: 3621

File Name: 090728ptp1blivers\_M\_NC\_ins\_e.raw

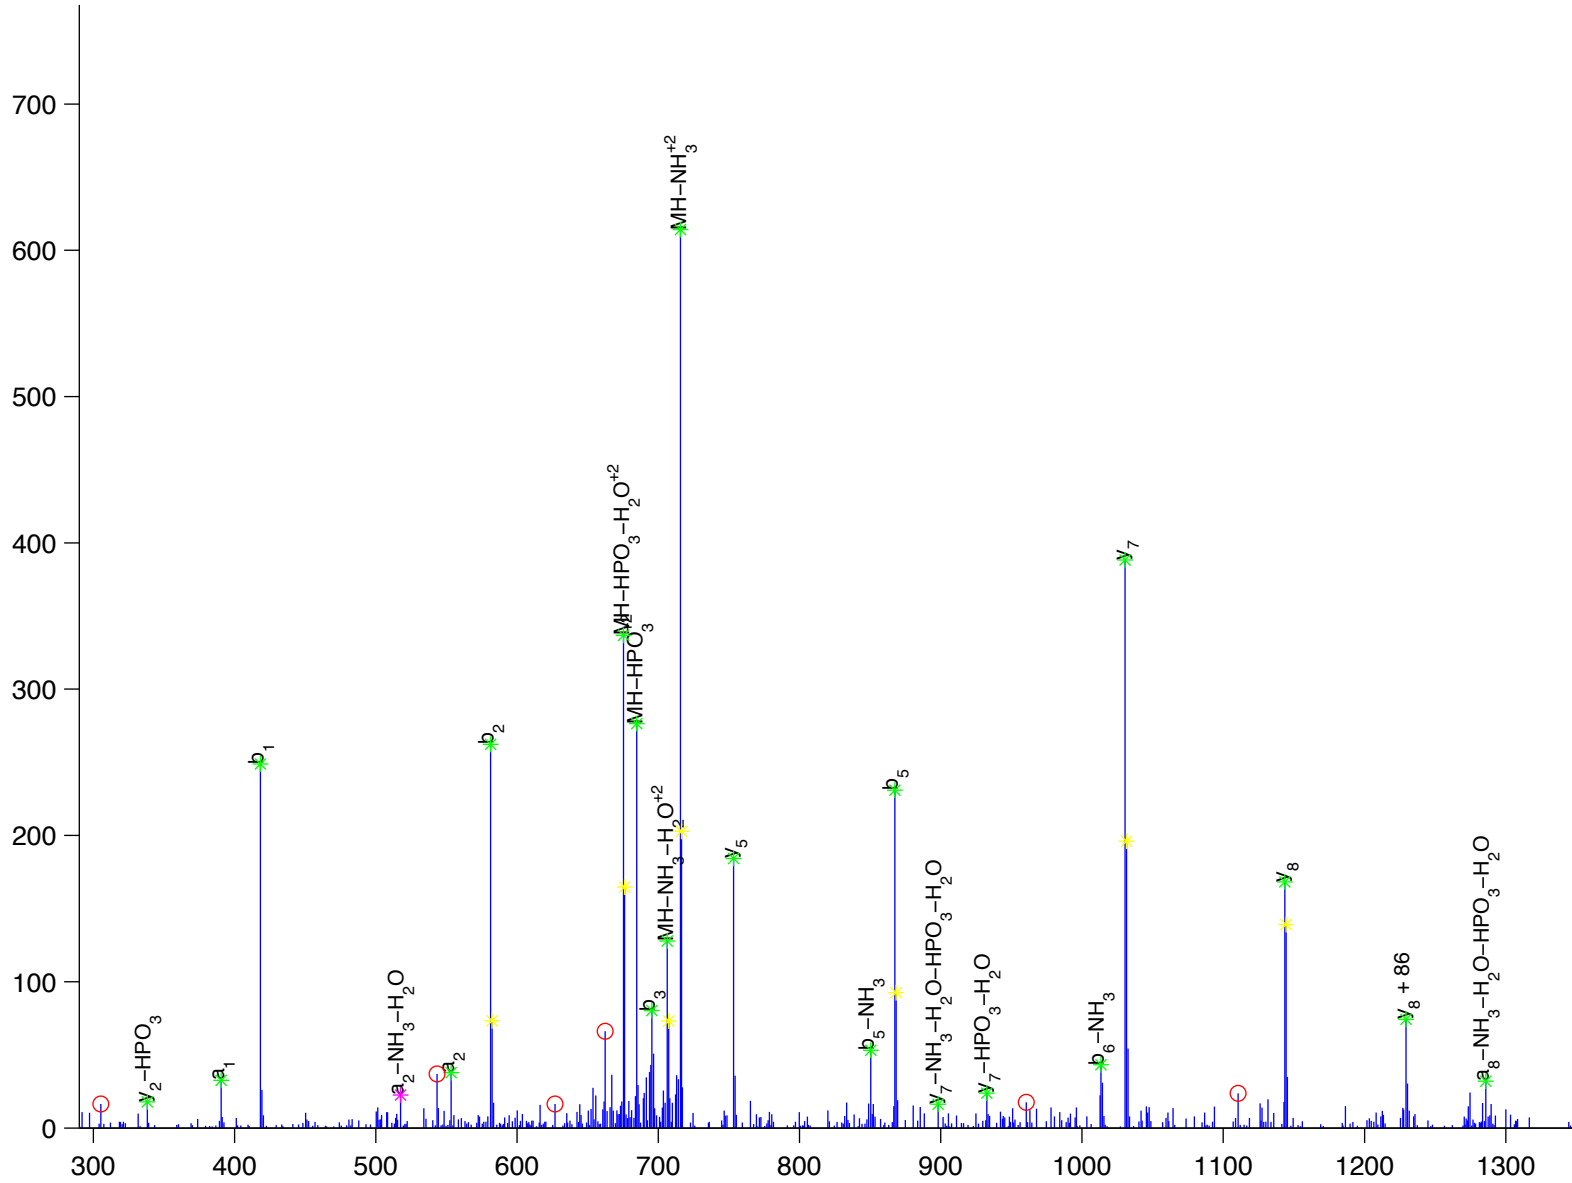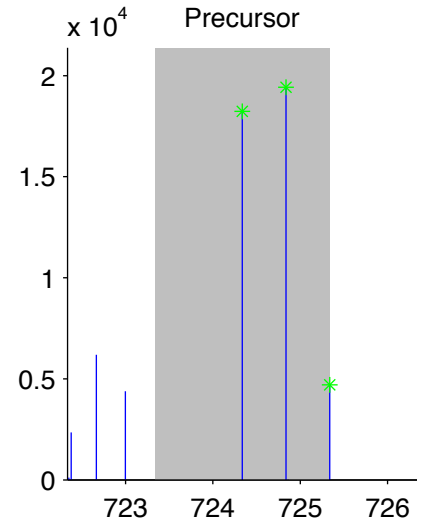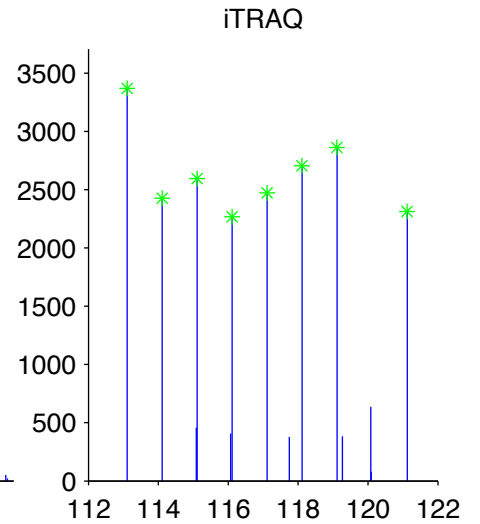



E [ A ] y [ N ] L [ G ] V [ R ]

betaine-homocysteine methyltransferase

Charge State: +2

Scan Number: 4647

File Name: 091130ptp1blivers\_hfd\_basal2.raw

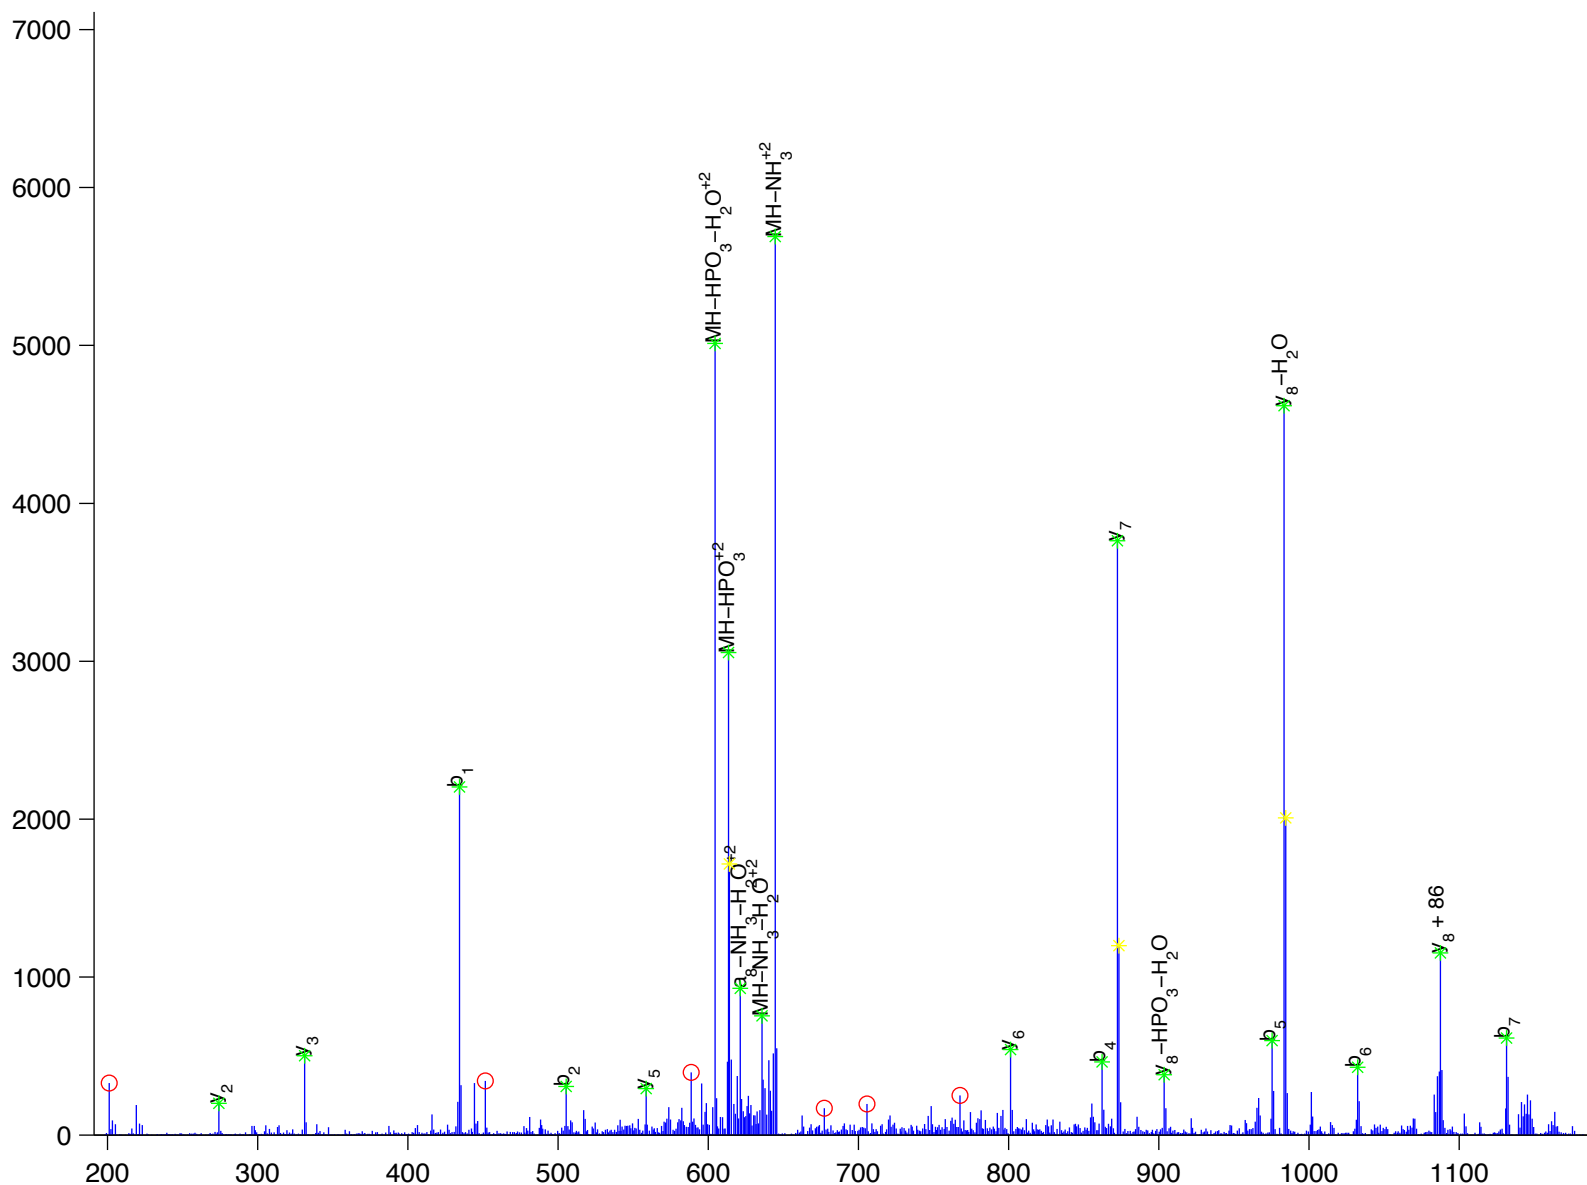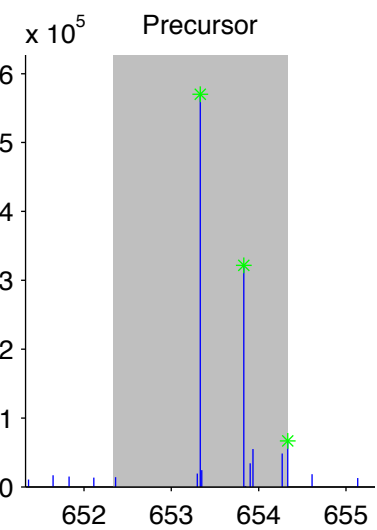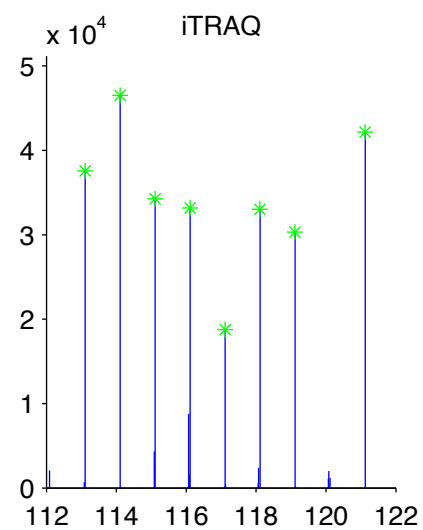

R [ P ] G [ P ] G [ T ] L [ y ] D [ V ] P [ R ]

breast cancer anti-estrogen resistance 1

Charge State: +3

Scan Number: 4433

File Name: 091130ptp1blivers\_hfd\_basal2.raw

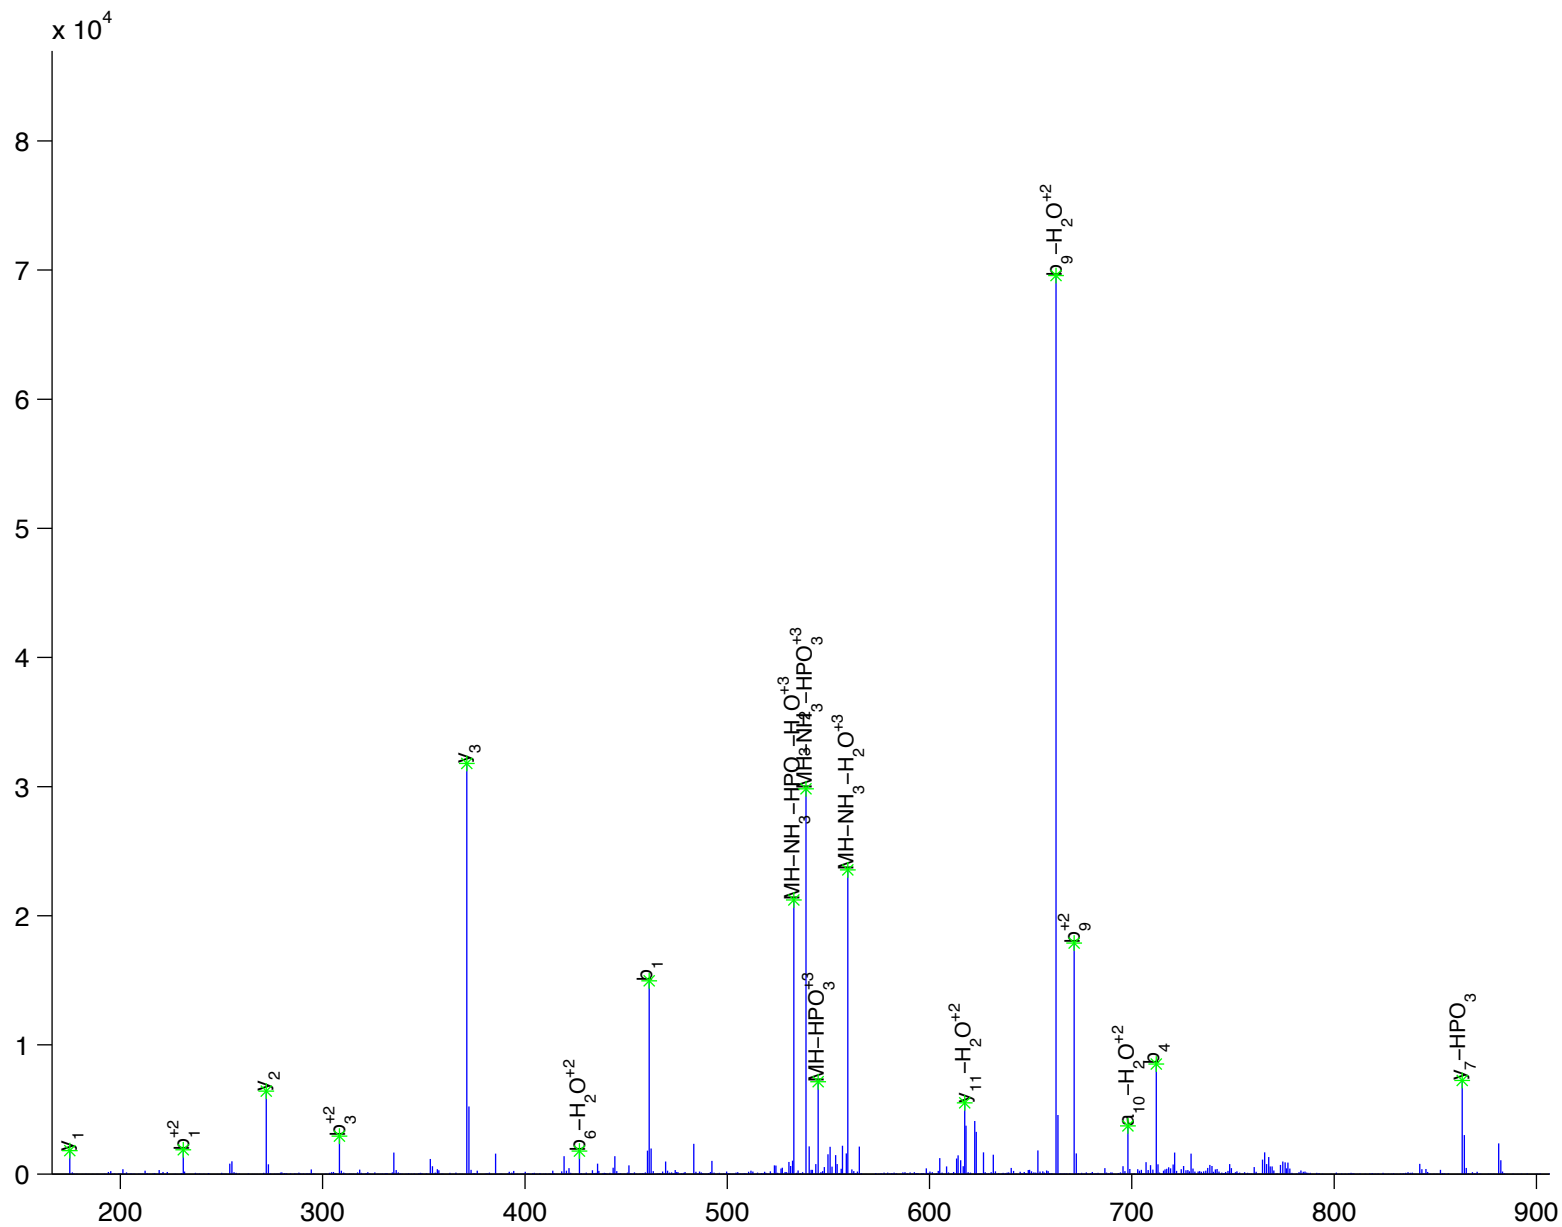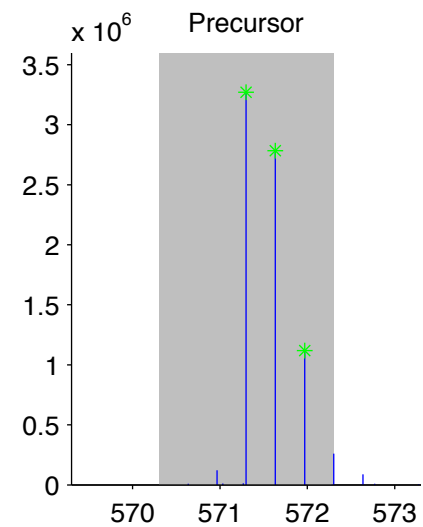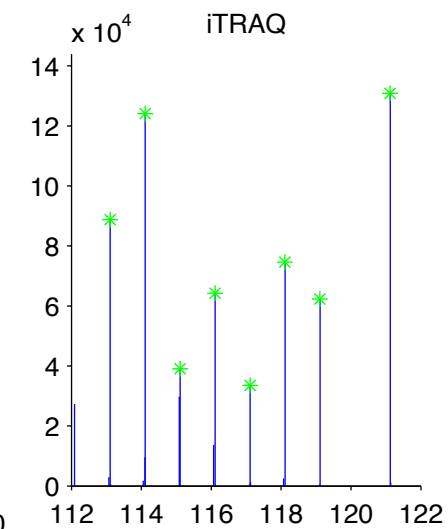

D [ P ] L [ L ] D [ V ] y [ D ] V [ P ] P [ S ] V [ E ] K

breast cancer anti-estrogen resistance 1

Charge State: +3

Scan Number: 5753

File Name: 100905ptp1blivers\_ncHFD\_basal.raw

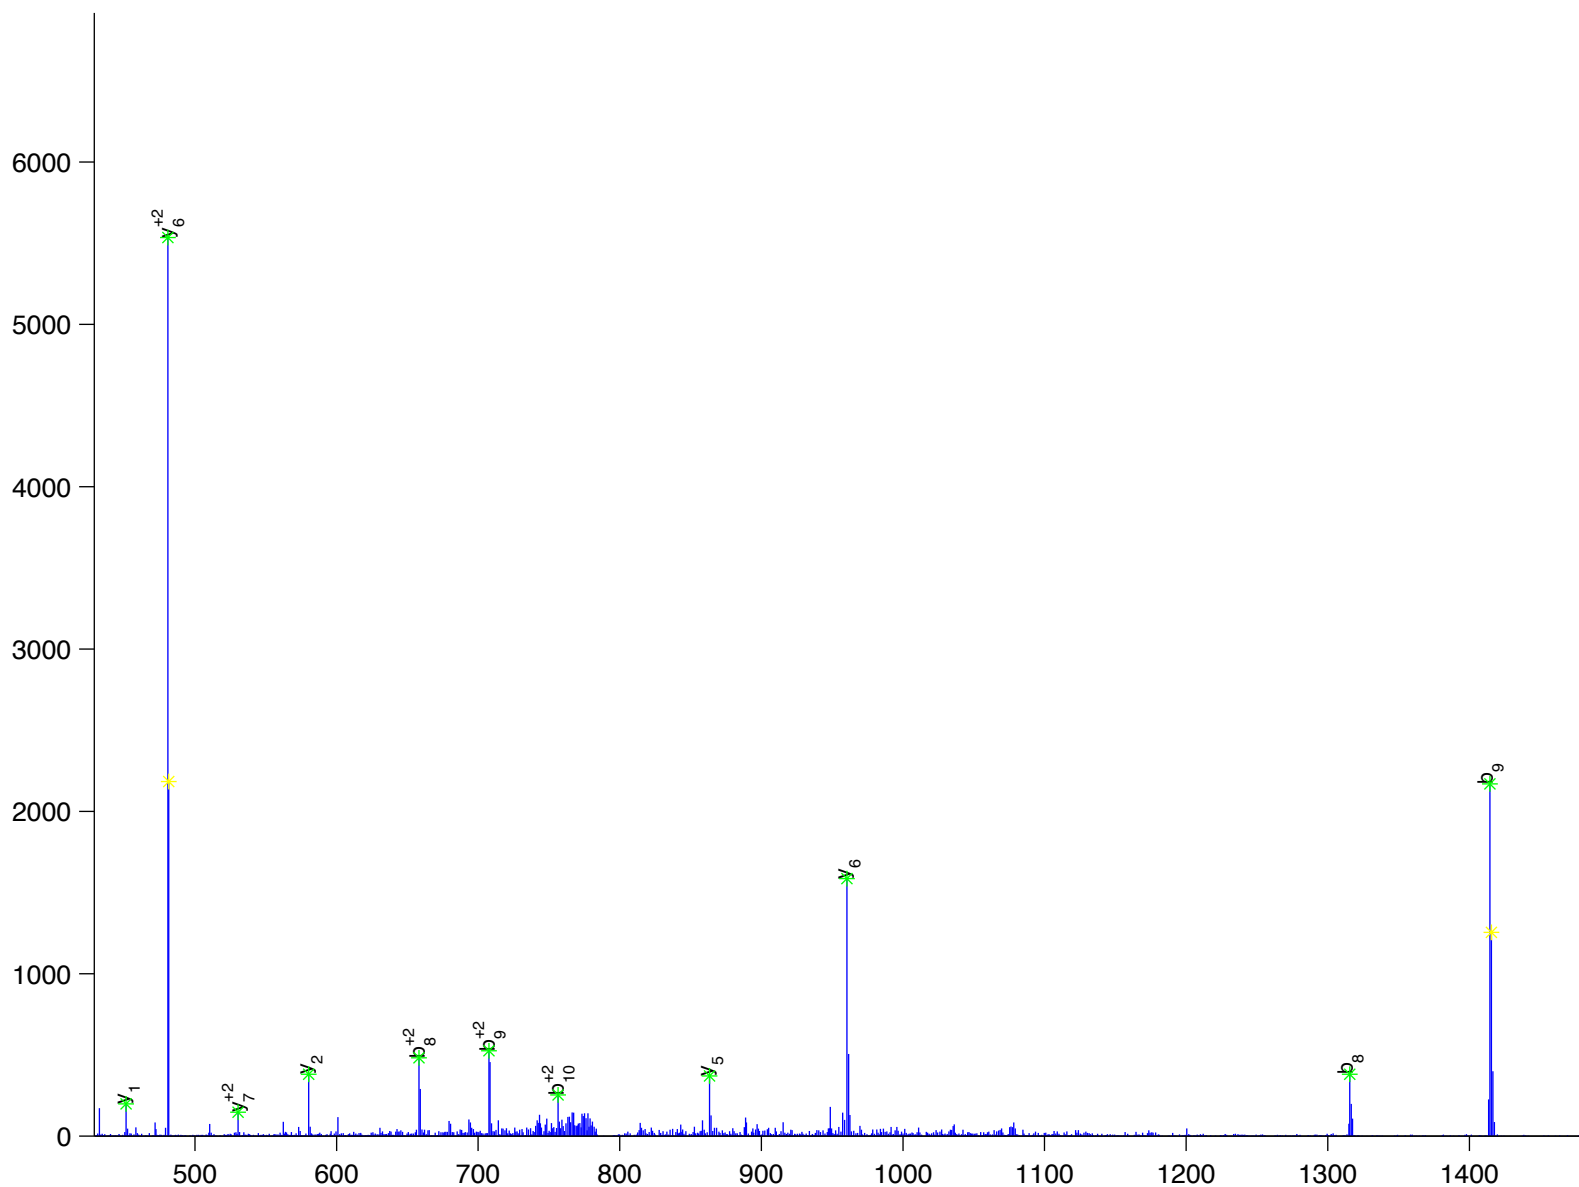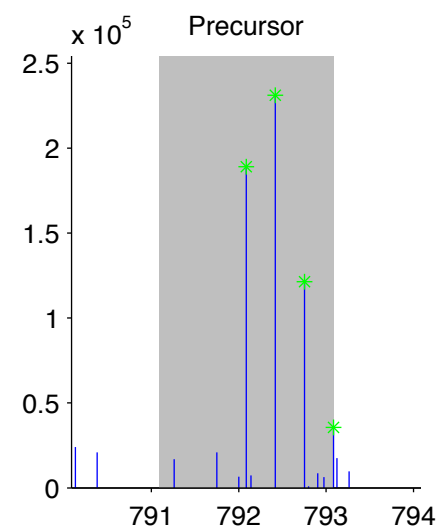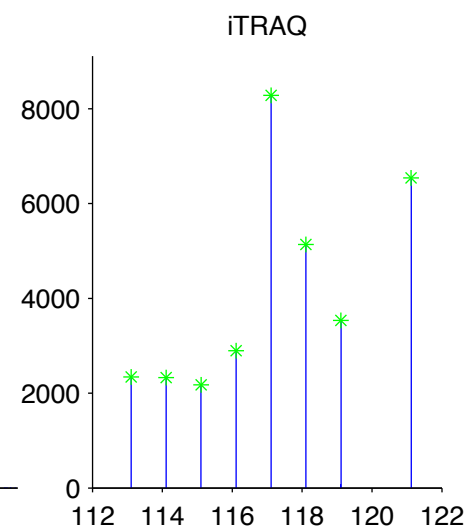

H<sup>+</sup>L<sup>+</sup>L<sup>+</sup>A<sup>+</sup>P<sup>+</sup>G<sup>+</sup>P<sup>+</sup>Q<sup>+</sup>D<sup>+</sup>I<sup>+</sup>y<sup>+</sup>D<sup>+</sup>V<sup>+</sup>P<sup>+</sup>P<sup>+</sup>V<sup>+</sup>R

breast cancer anti-estrogen resistance 1

Charge State: +3

Scan Number: 6218

File Name: 091130ptp1blivers\_hfd\_basal2.raw

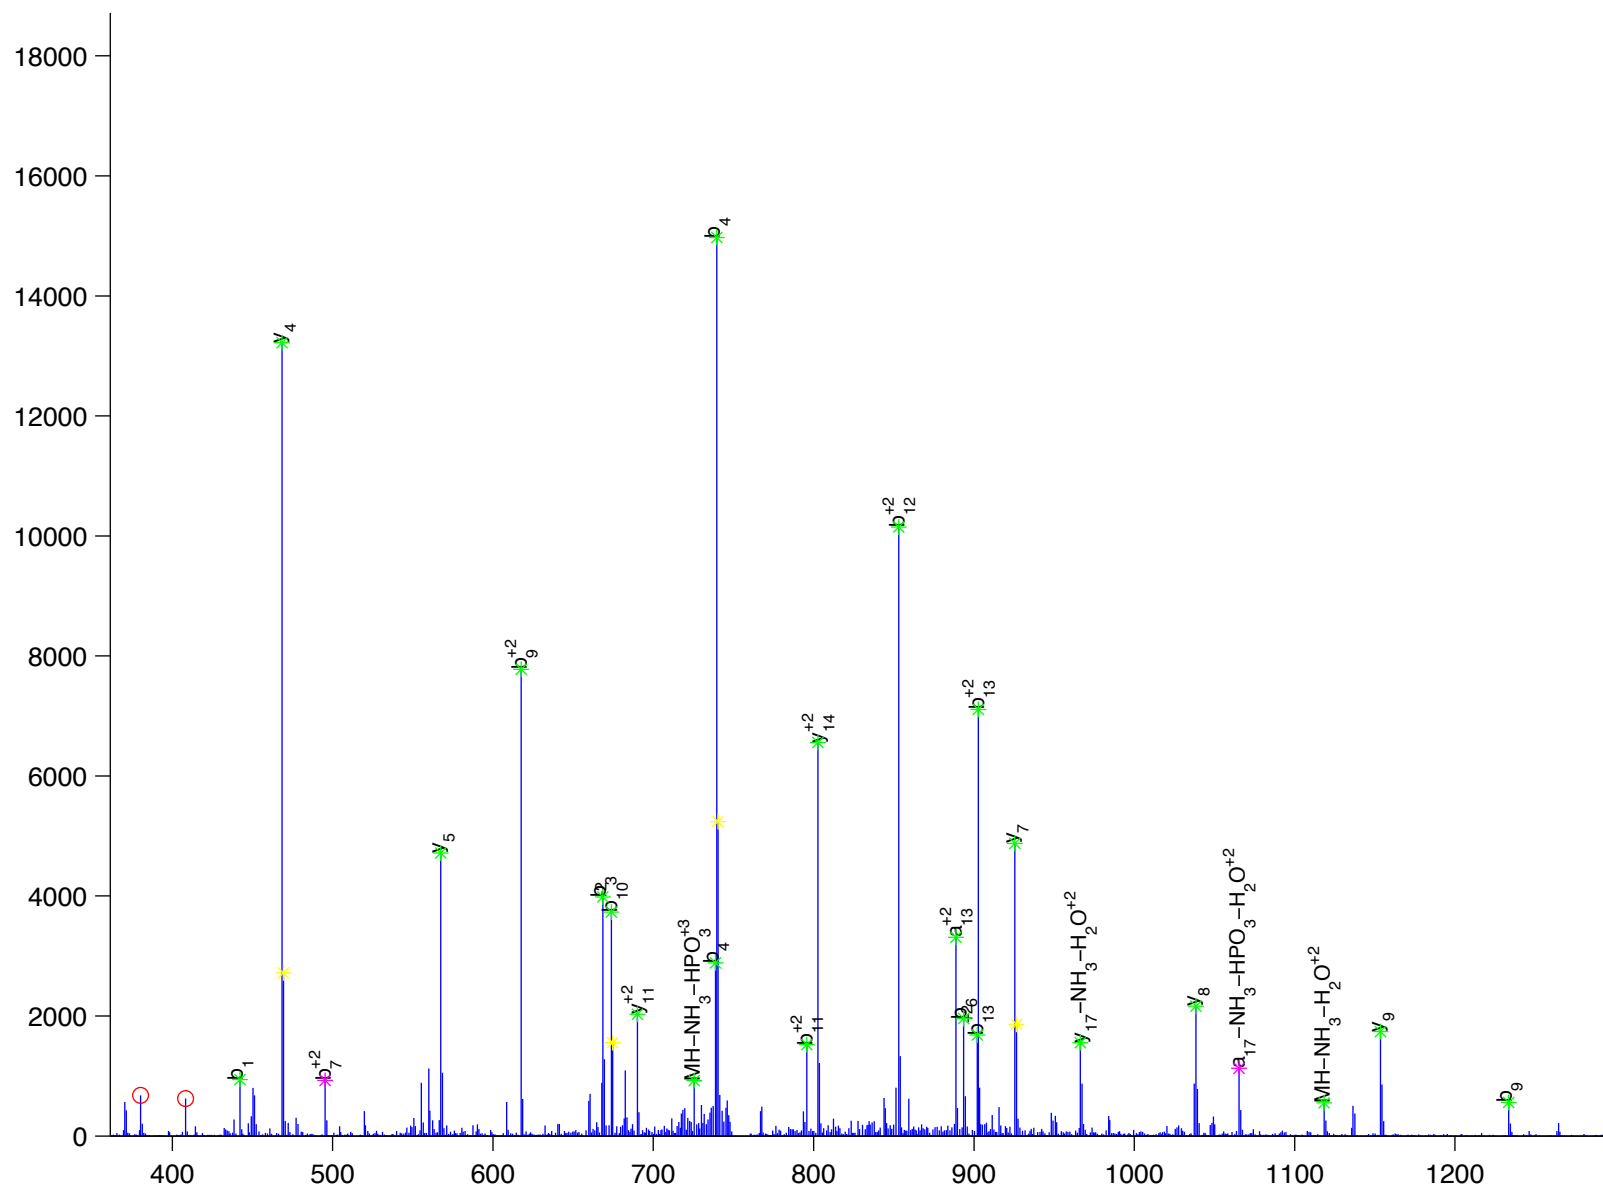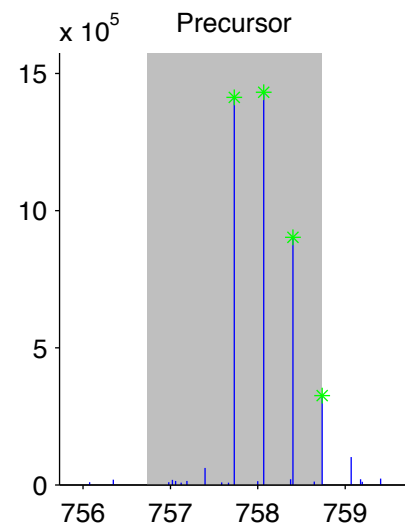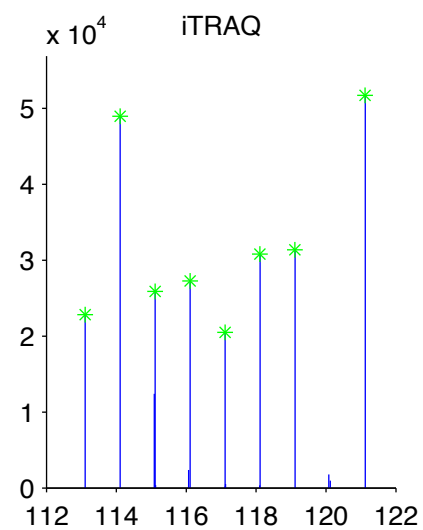

G [ P ] N [ G ] R [ D ] P [ L ] L [ D ] V [ y ] D [ V ] P [ P ] S [ V ] E [ K ]

breast cancer anti-estrogen resistance 1

Charge State: +3

Scan Number: 6253

File Name: 091130ptp1blivers\_hfd\_basal2.raw

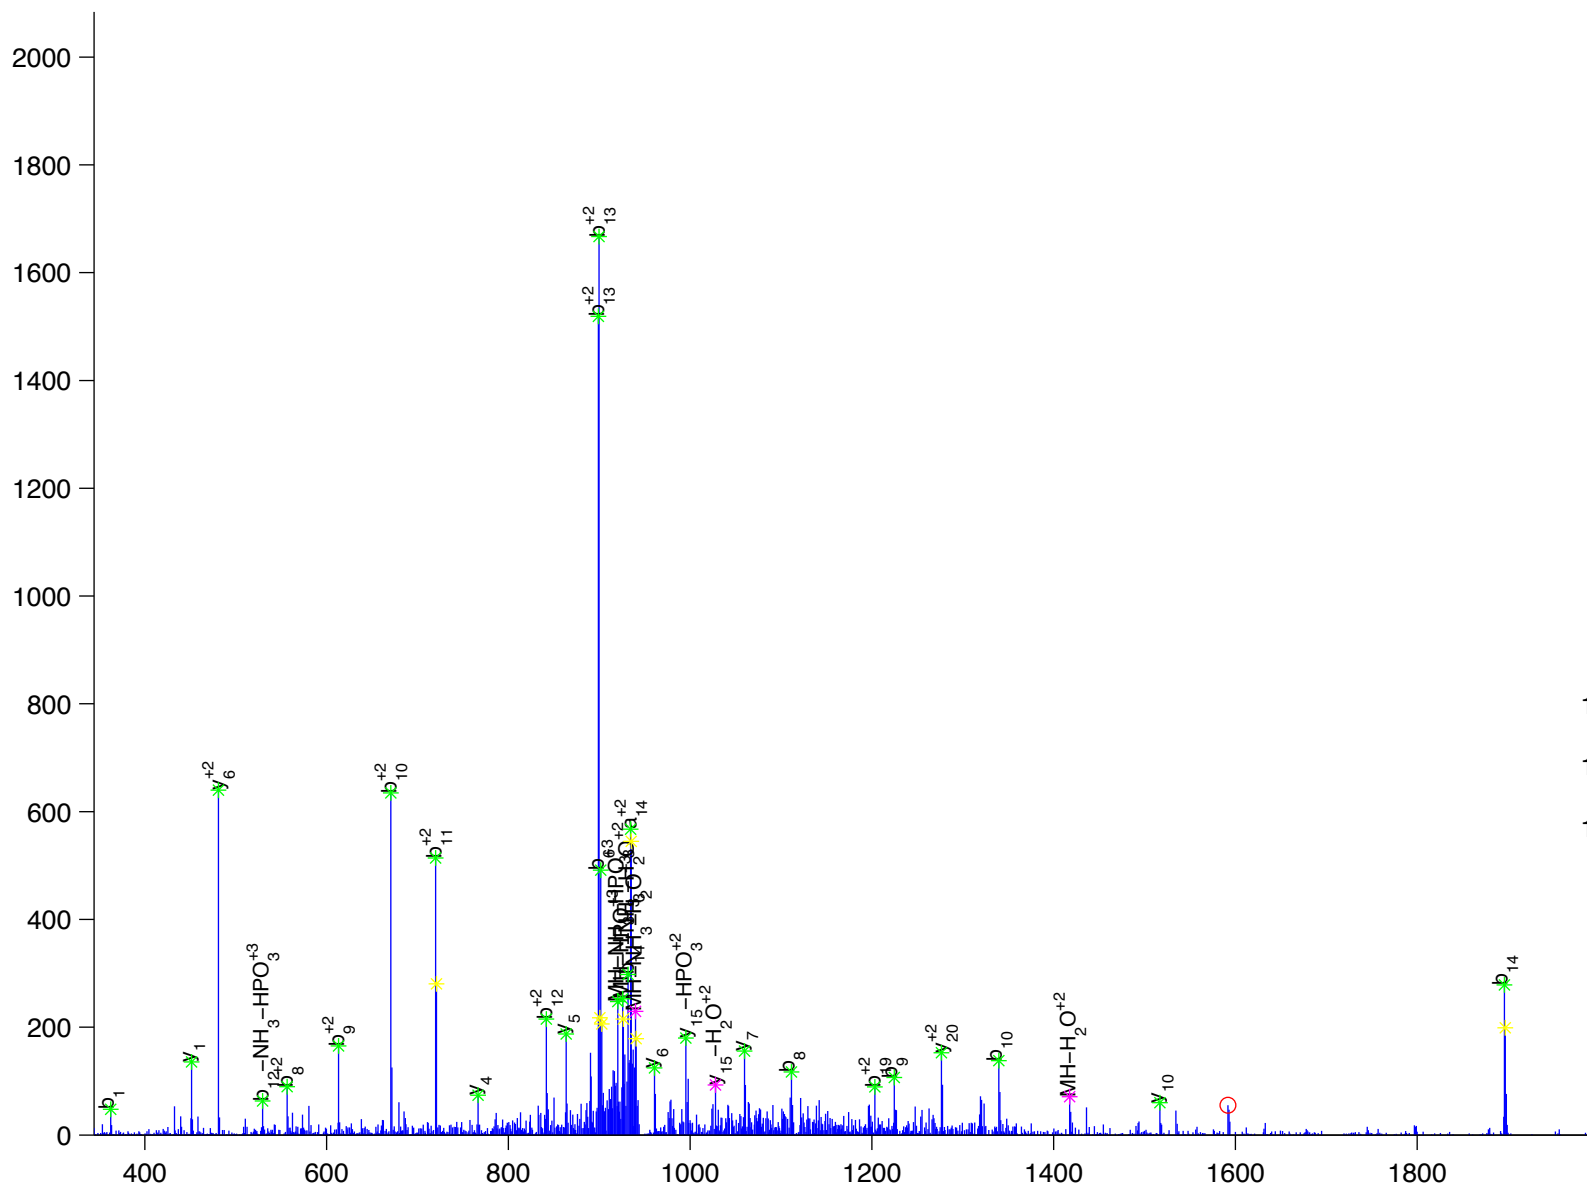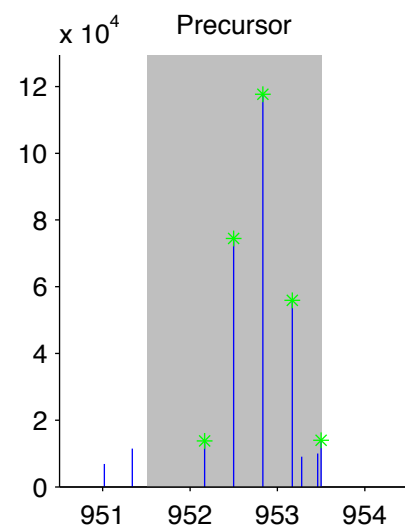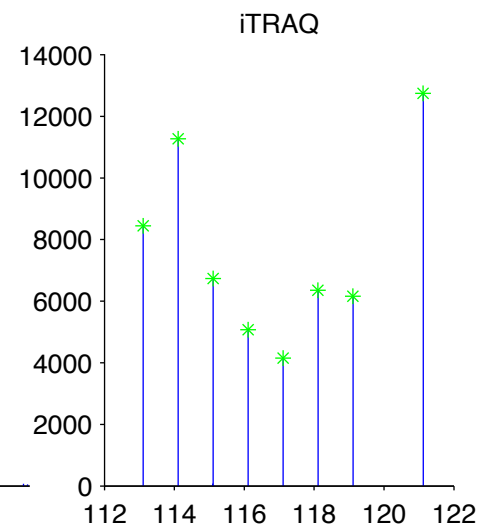

G L L P N Q Y G Q E V y D T P P M A V K

breast cancer anti-estrogen resistance 1

Charge State: +3

Scan Number: 6950

File Name: 091130ptp1blivers\_hfd\_basal2.raw

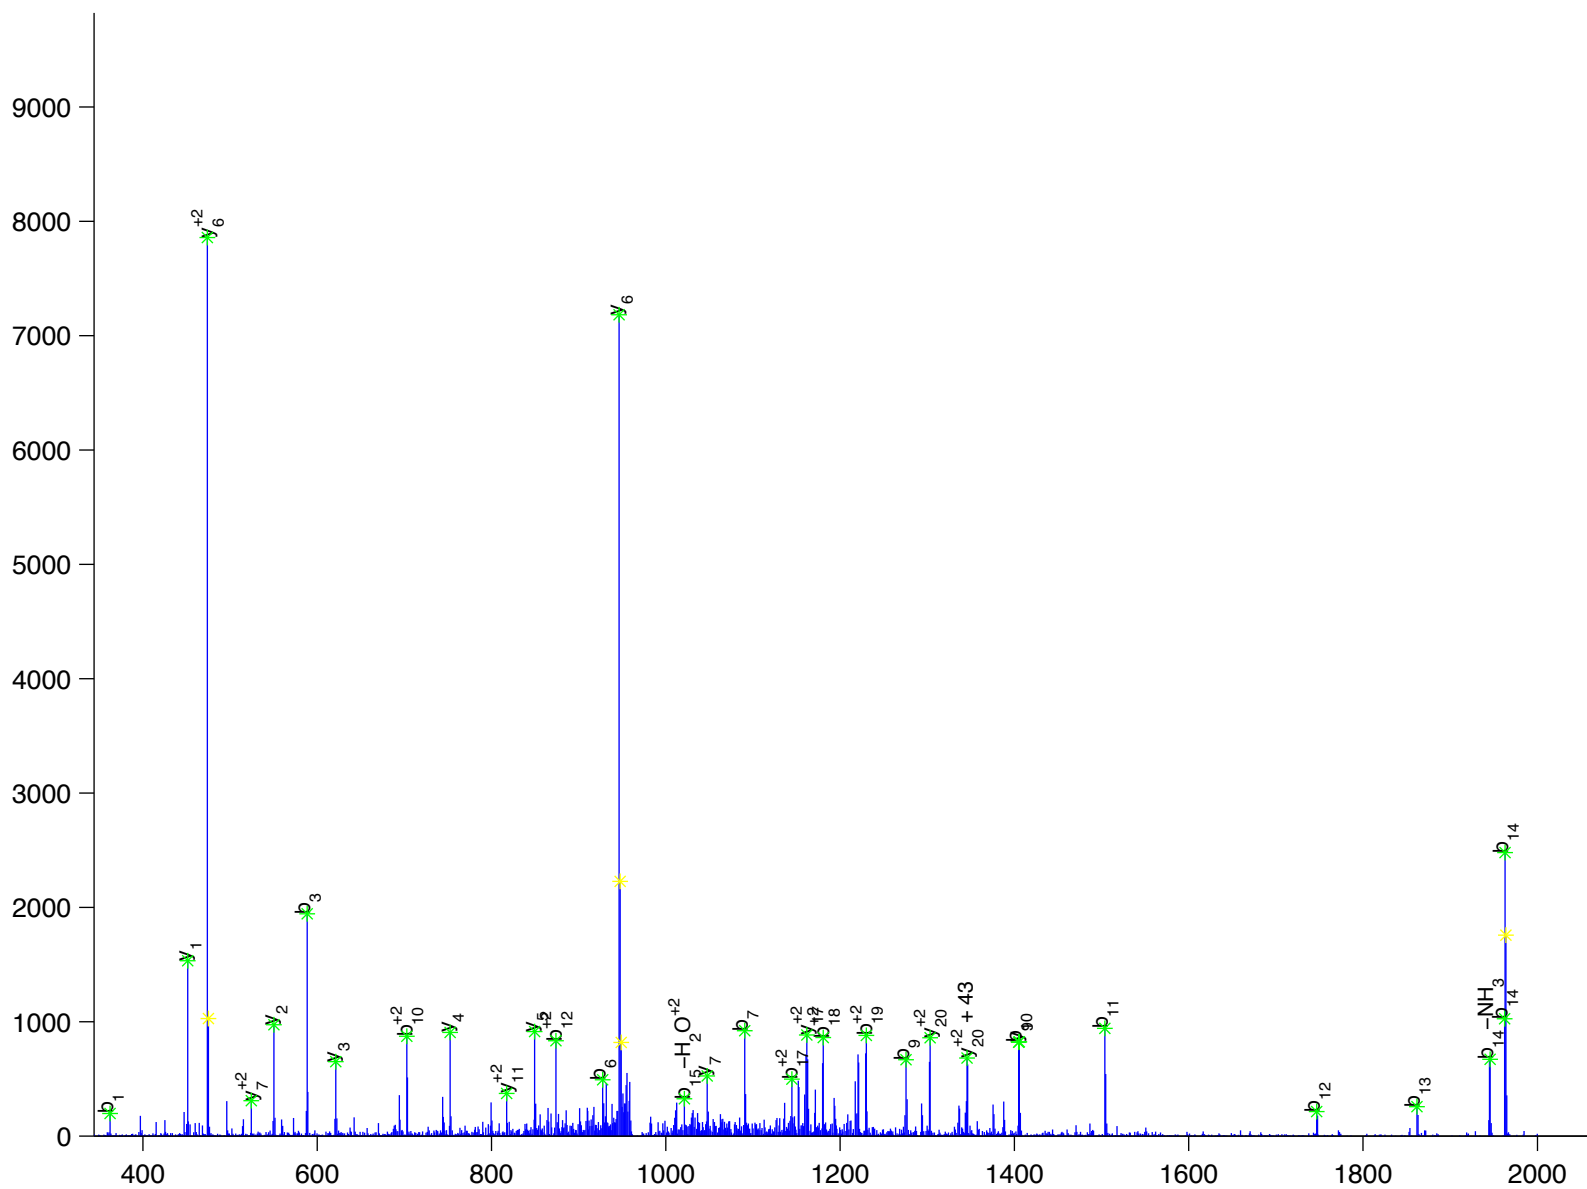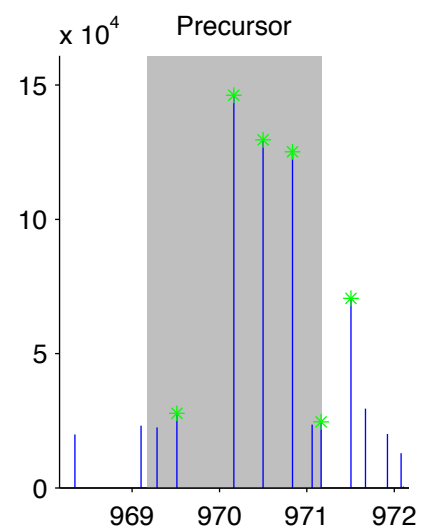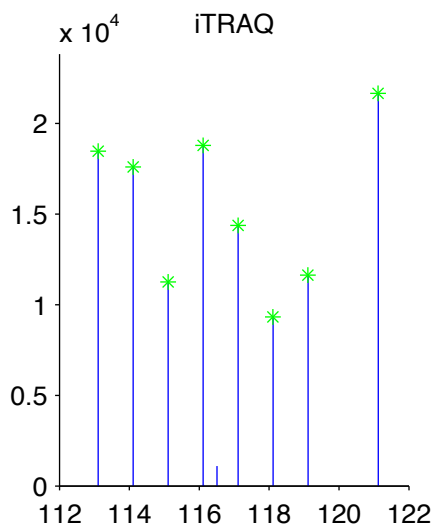

V L P P E V A D G S V V D D G V y A V P P P A E R

breast cancer anti-estrogen resistance 1

Charge State: +3

Scan Number: 7347

File Name: 091130ptp1blivers\_hfd\_basal2.raw

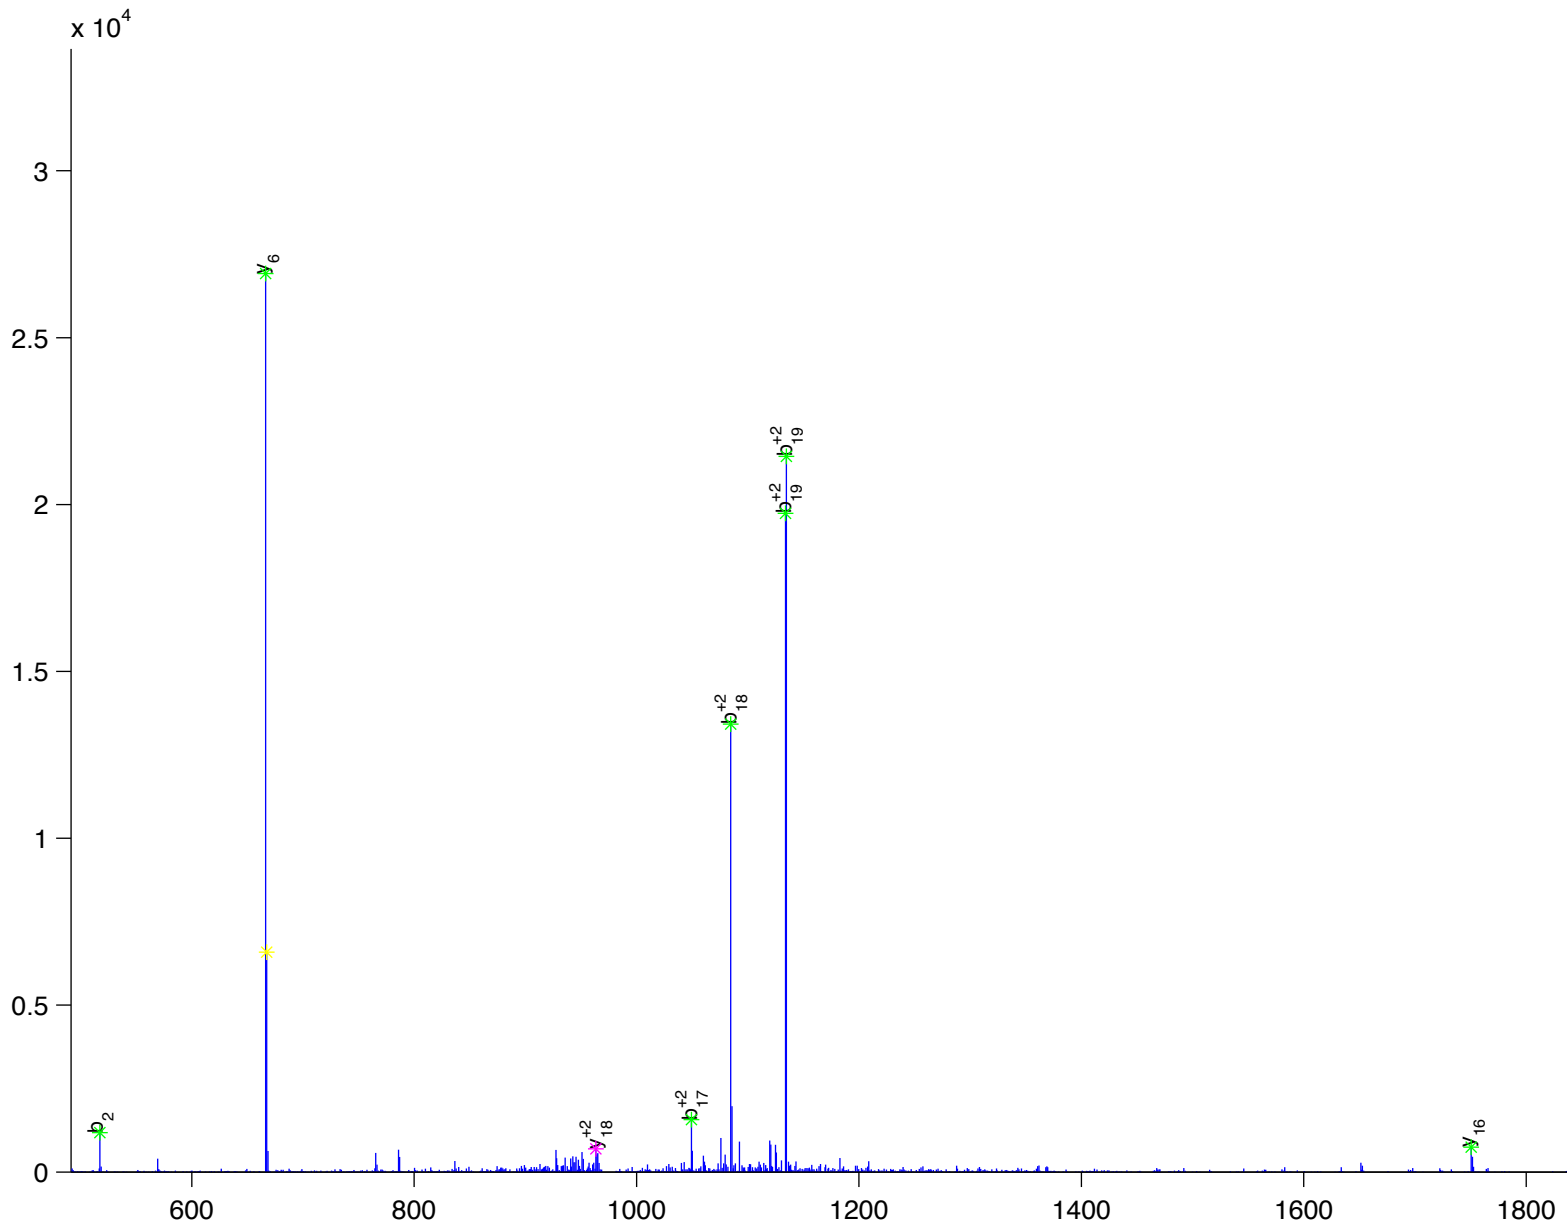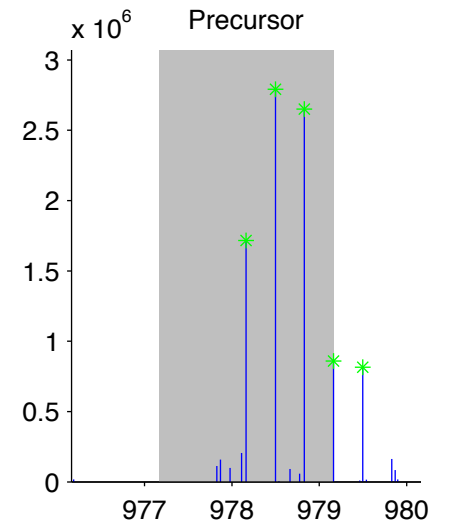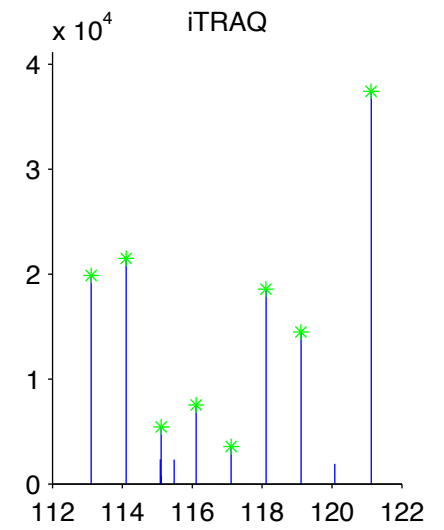

M [ E ] [ D ] [ V ] y [ Q ] [ T ] [ L ] [ V ] [ V ] [ H ] [ G ] [ Q ] [ V ] [ L ] [ D ] [ S ] [ G ] [ R ]

breast cancer anti-estrogen resistance 1

Charge State: +3

Scan Number: 7475

File Name: 091130ptp1blivers\_hfd\_basal2.raw

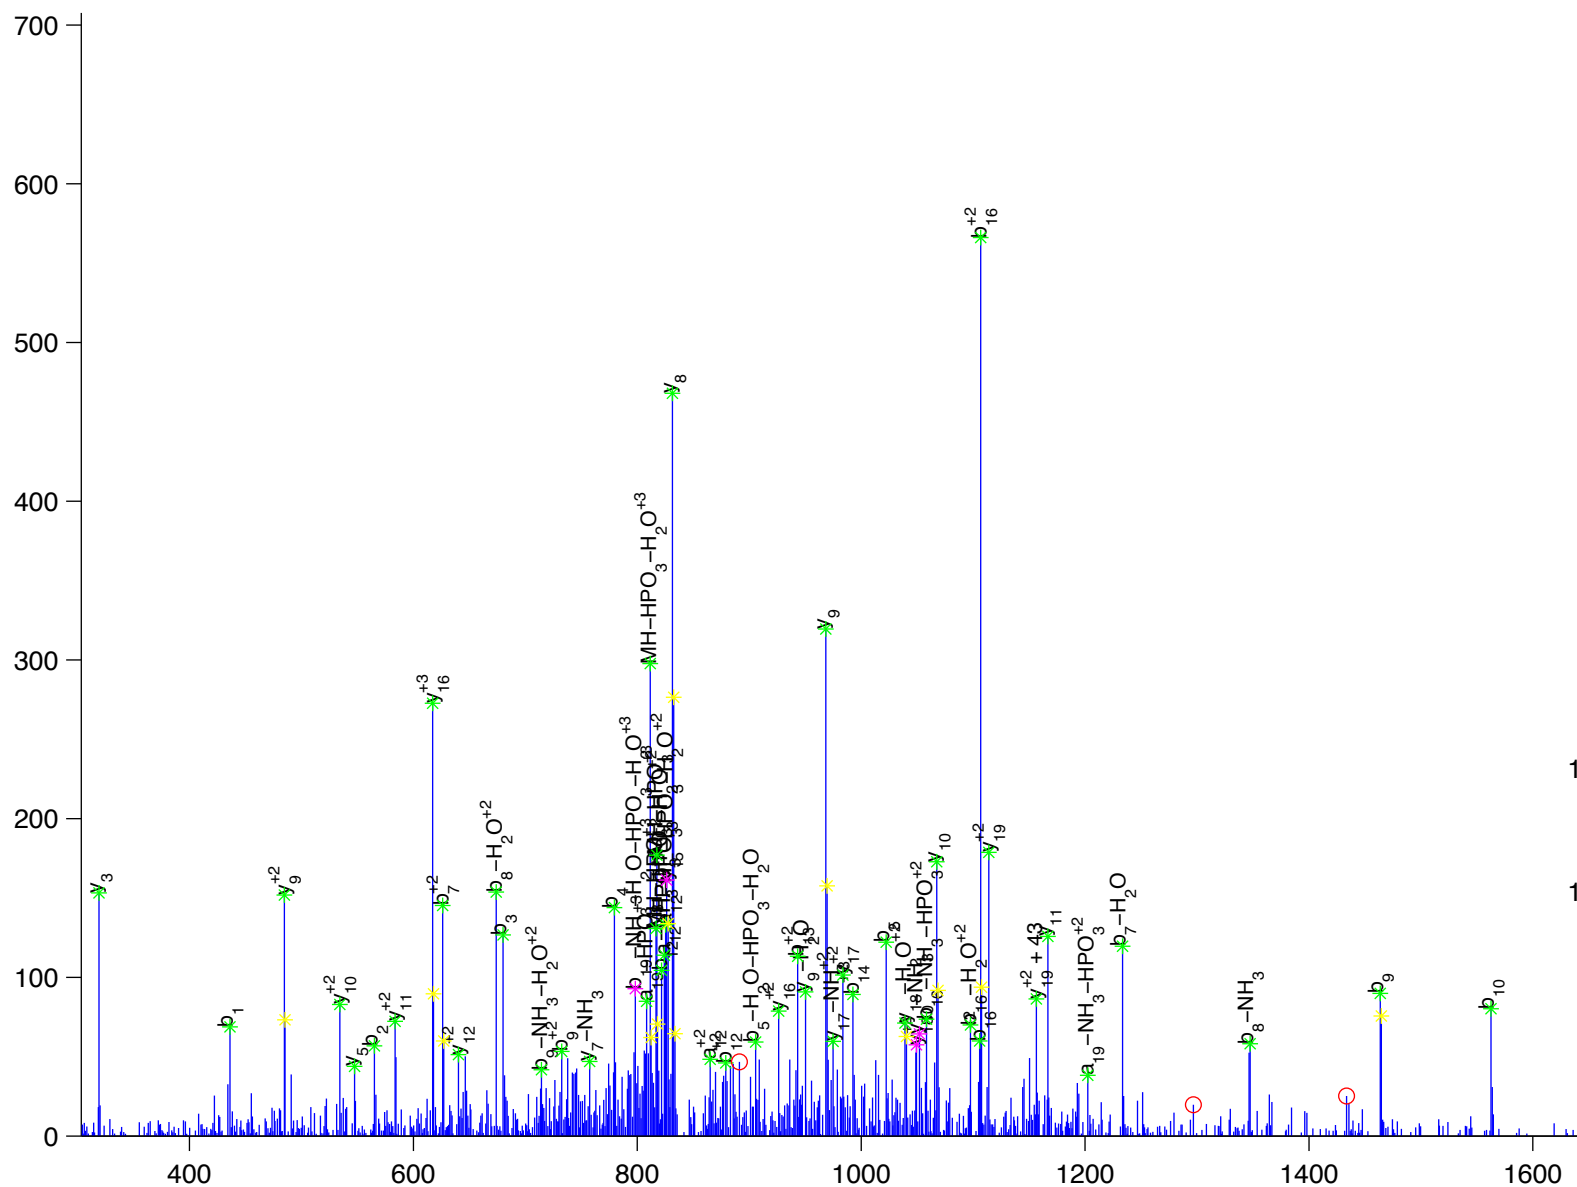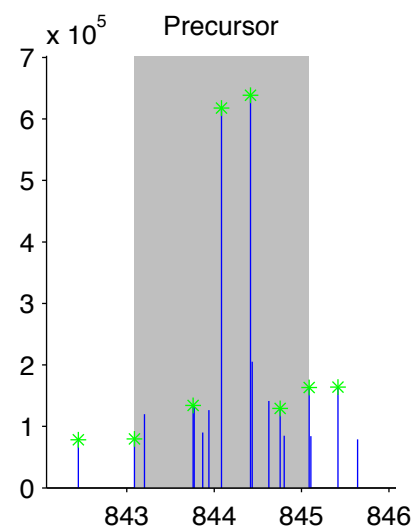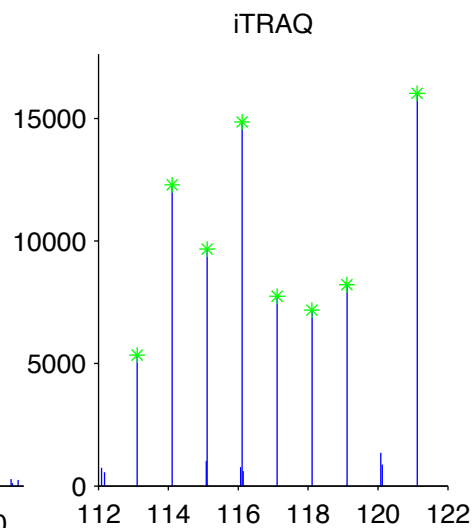



T[P]P[S]P[S]P[W]L[T]S[E]A[N]y[C]E[L]N[P]A[F]A[V]G[C]D[R]

breast cancer anti-estrogen resistance 3

Charge State: +4

Scan Number: 5633

File Name: 100908ptp1blivers\_ncHFD3\_basal.raw

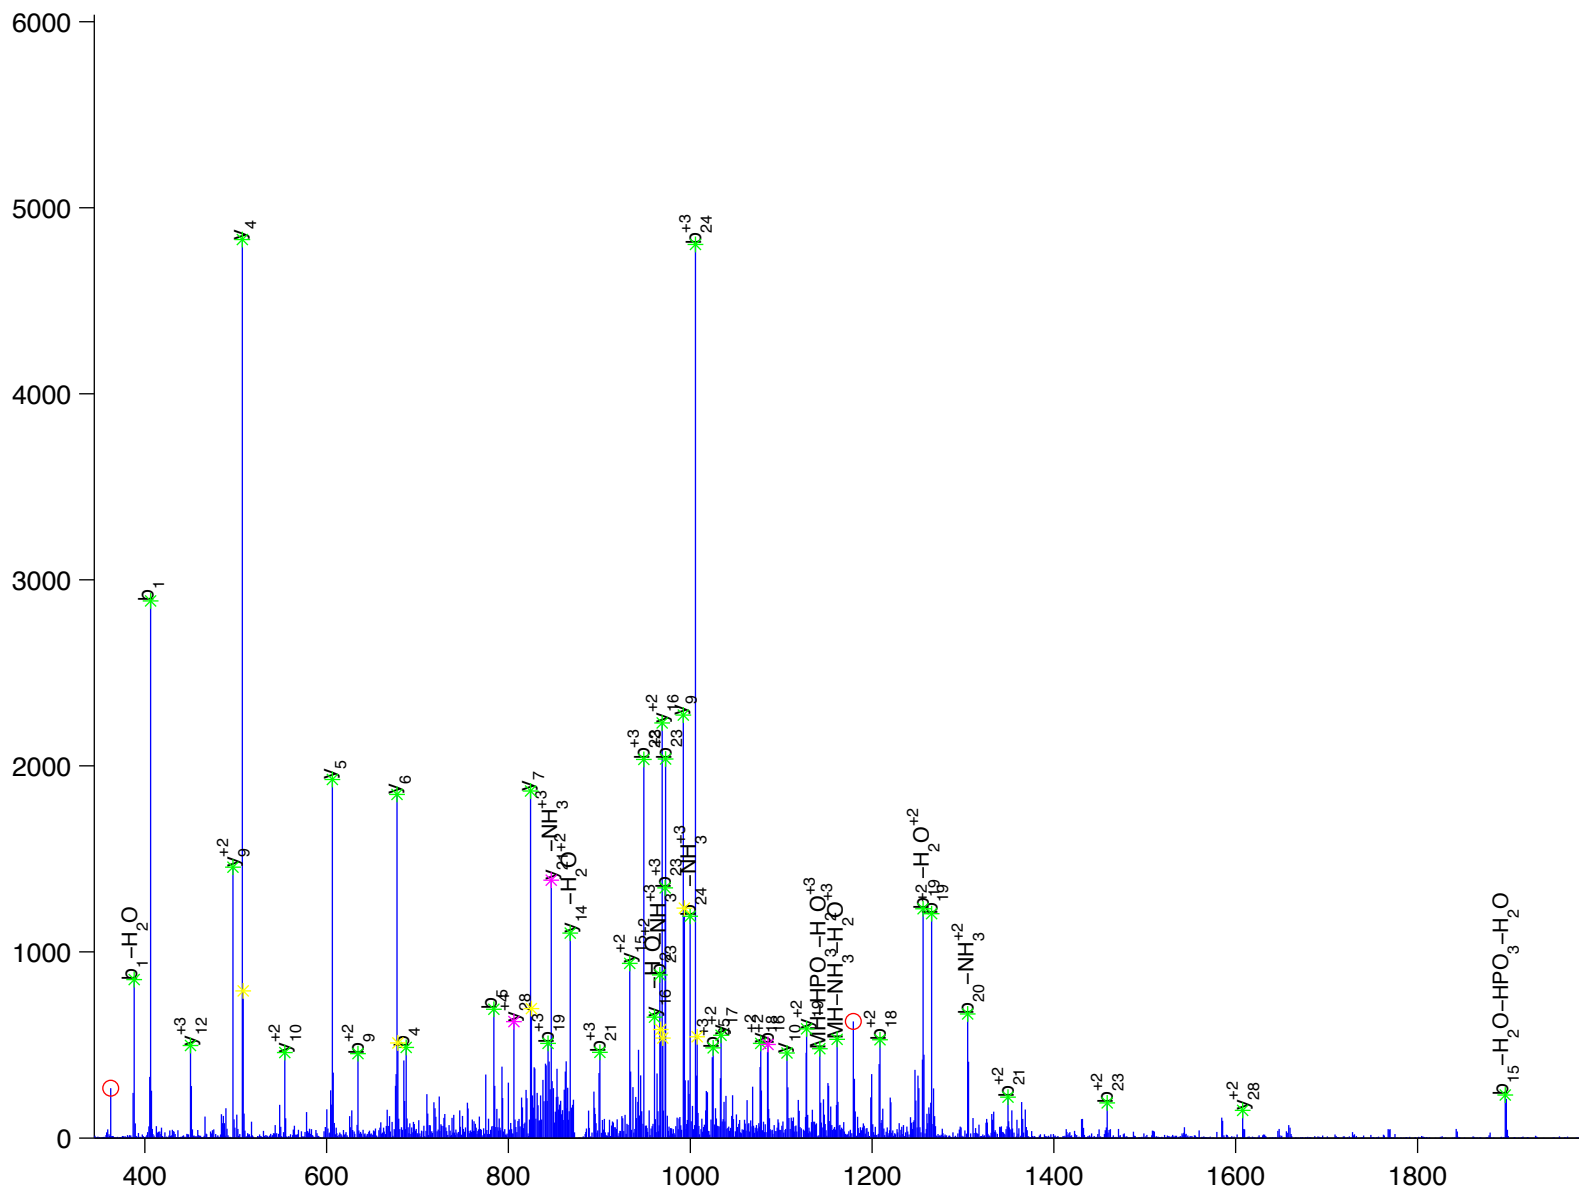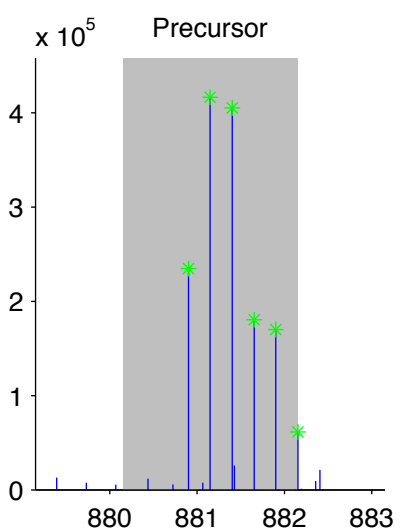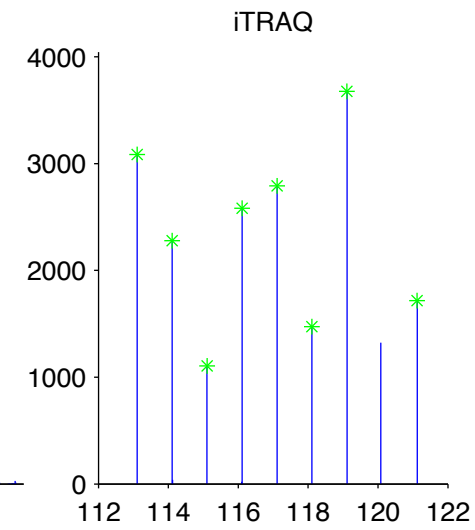

V[G]Q[G]Y[V]Y[E]A[A]Q[T]E[Q]D[E]y[D]T[P]R

breast cancer anti-estrogen resistance 3

Charge State: +3

Scan Number: 5579

File Name: 090806ptp1blivers\_M\_NC2.raw

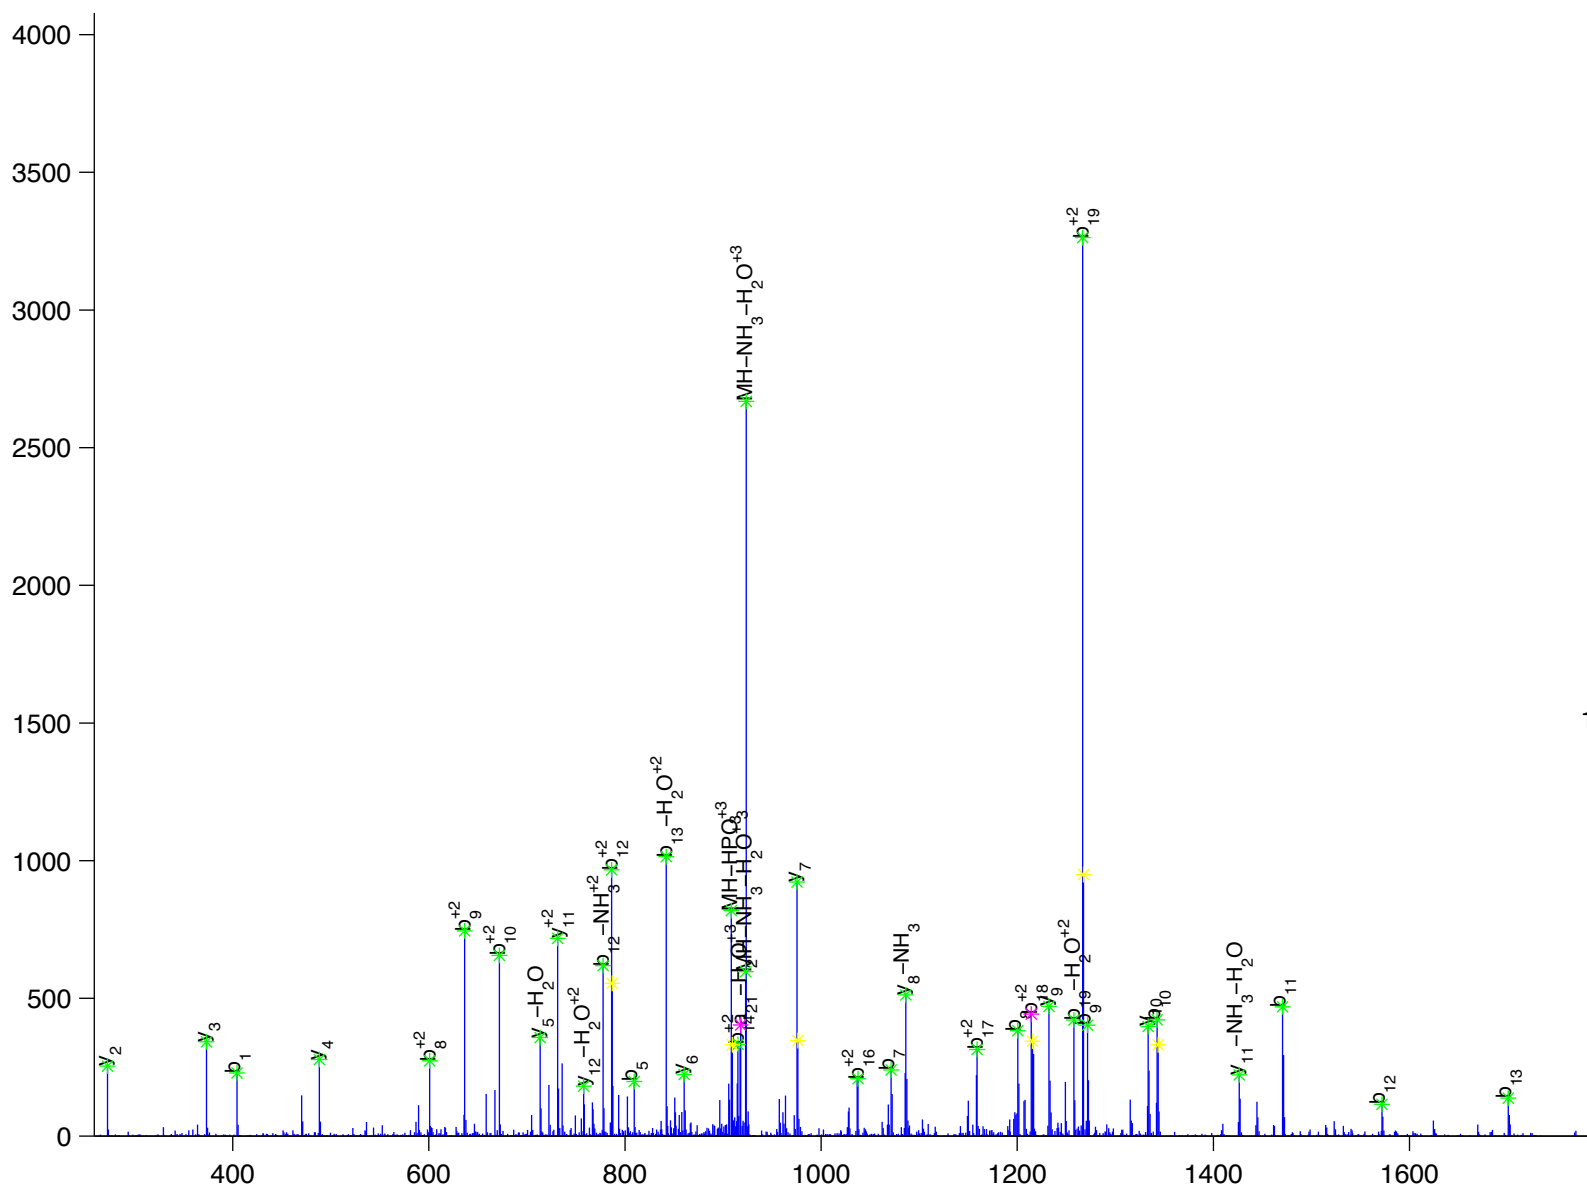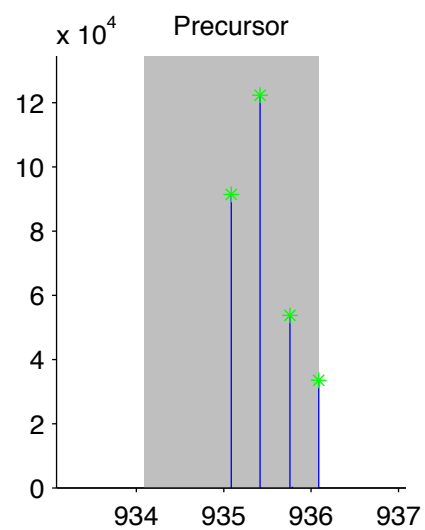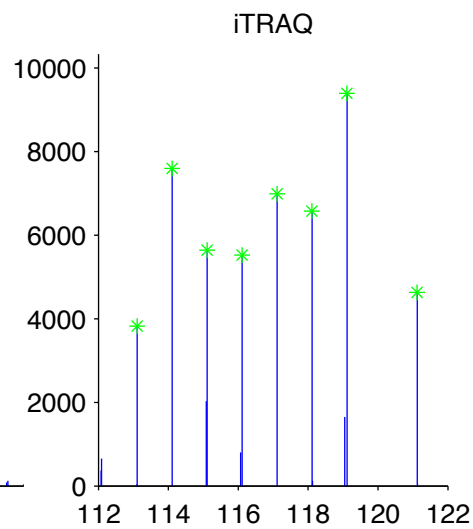

V [ G ] [ E ] [ E ] [ G ] [ H ] [ E ] [ G ] [ C ] [ S ] y [ A ] [ V ] [ C ] [ S ] [ E ] [ G ] [ R ]

C1 domain-containing phosphatase and tensin-like protein

Charge State: +3

Scan Number: 3704

File Name: 091130ptp1blivers\_hfd\_basal2.raw

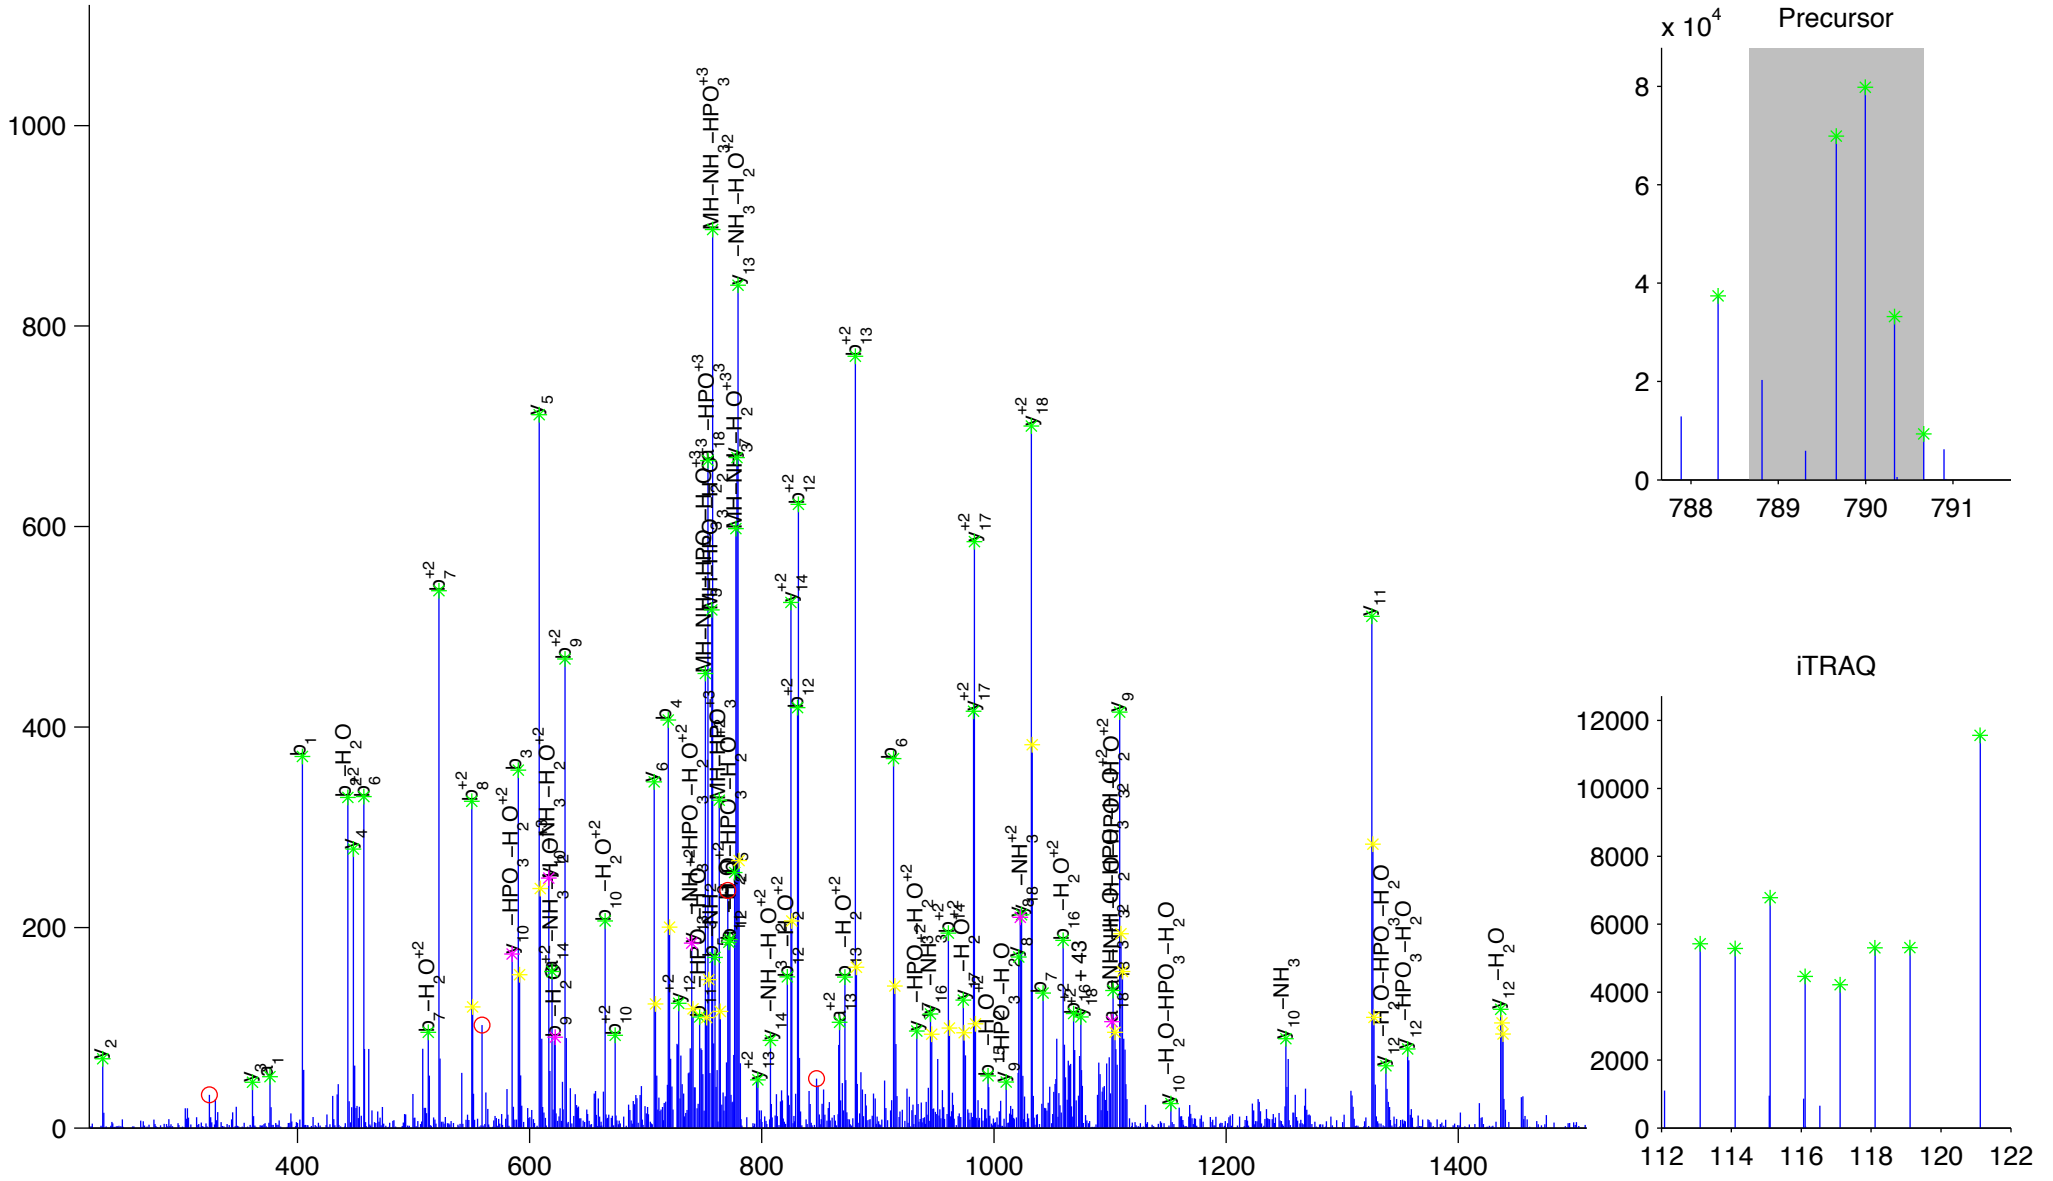

G [ P ] L [ D ] G [ S ] P [ y ] A [ Q ] V [ Q ] R

C1 domain-containing phosphatase and tensin-like protein

Charge State: +2

Scan Number: 5124

File Name: 0090807ptp1blivers\_M\_HFD2.raw

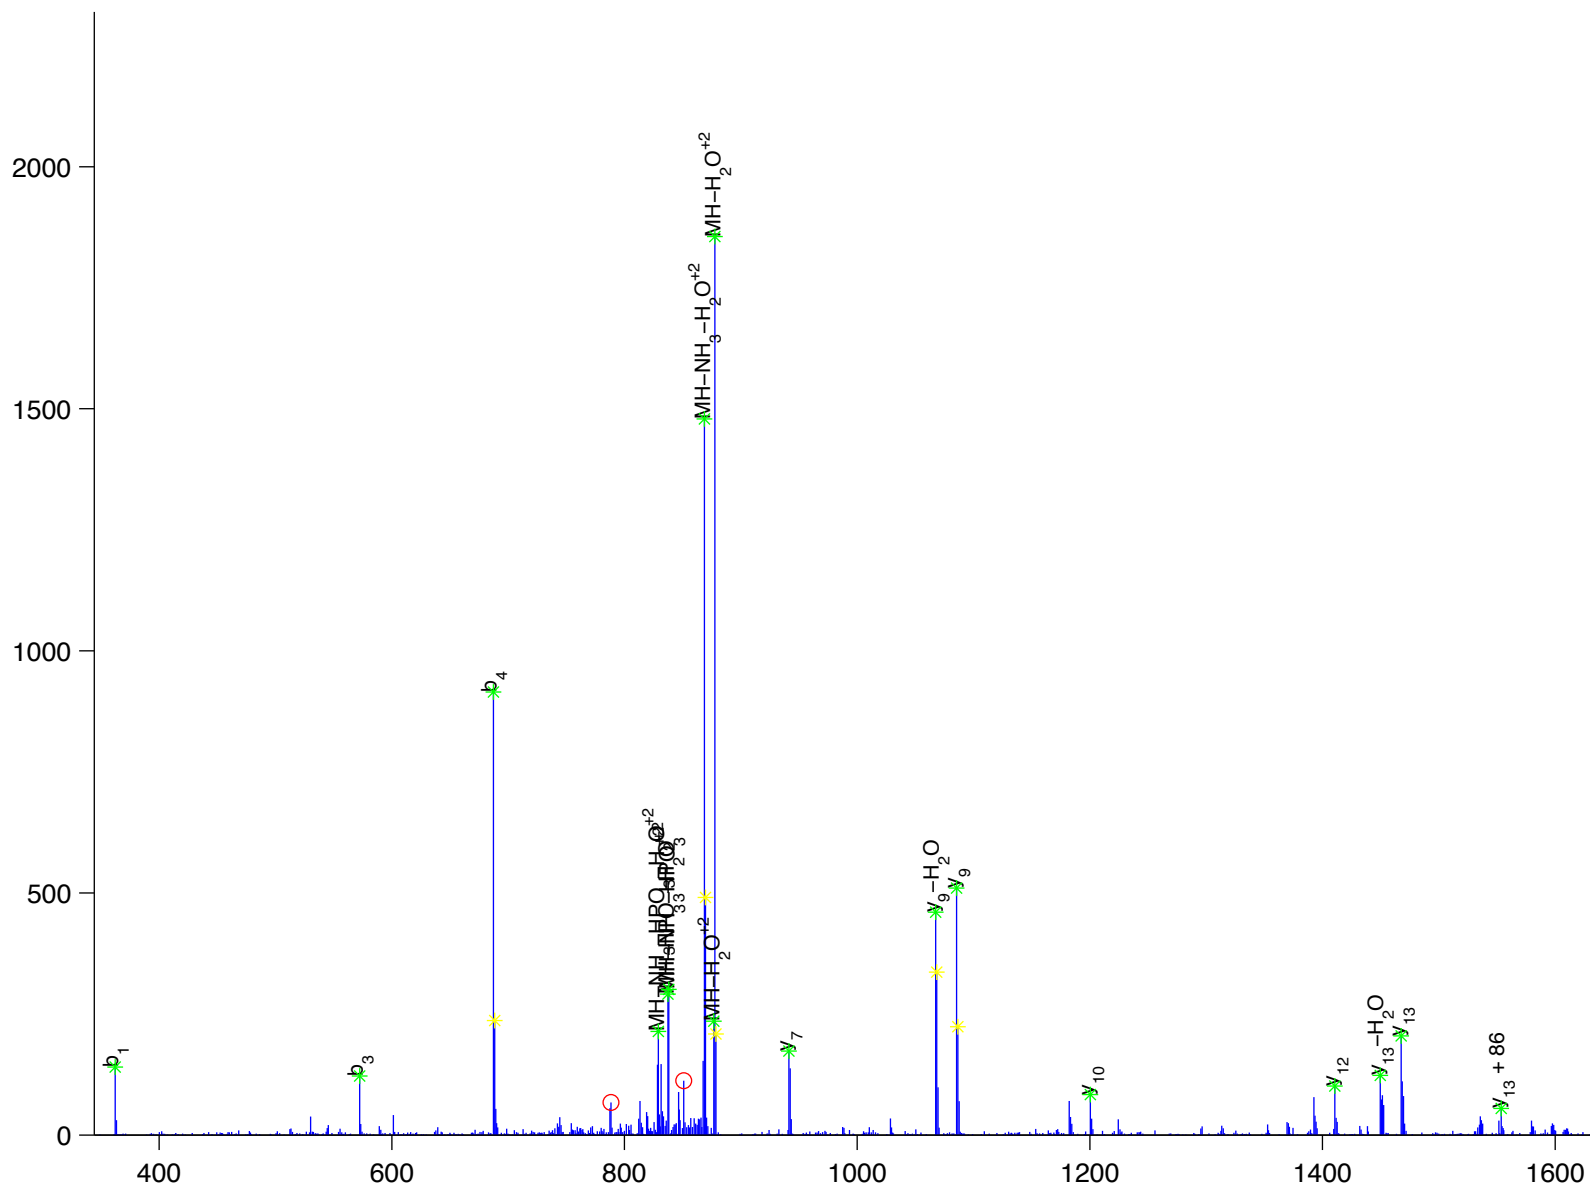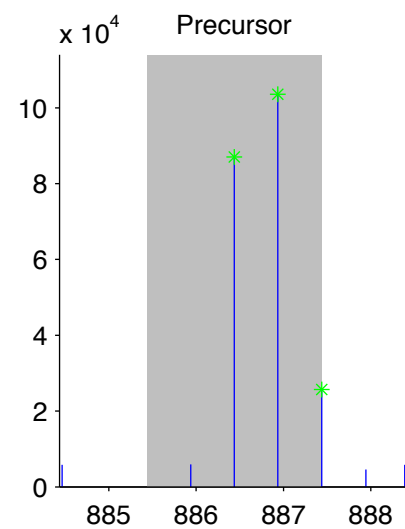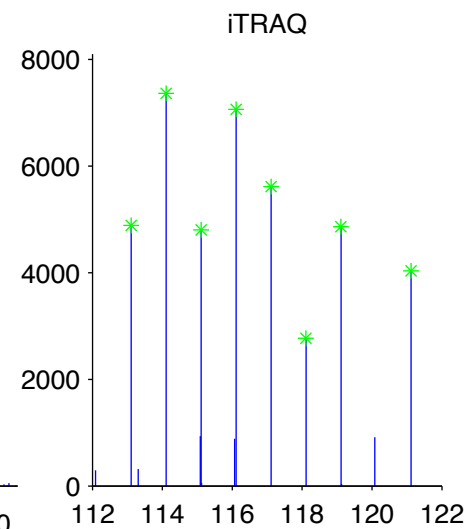

L [ A ] L [ P ] T [ A ] A [ L ] y [ G ] L [ R ]

C1 domain-containing phosphatase and tensin-like protein

Charge State: +2

Scan Number: 8570

File Name: 091130ptp1blivers\_hfd\_basal2.raw

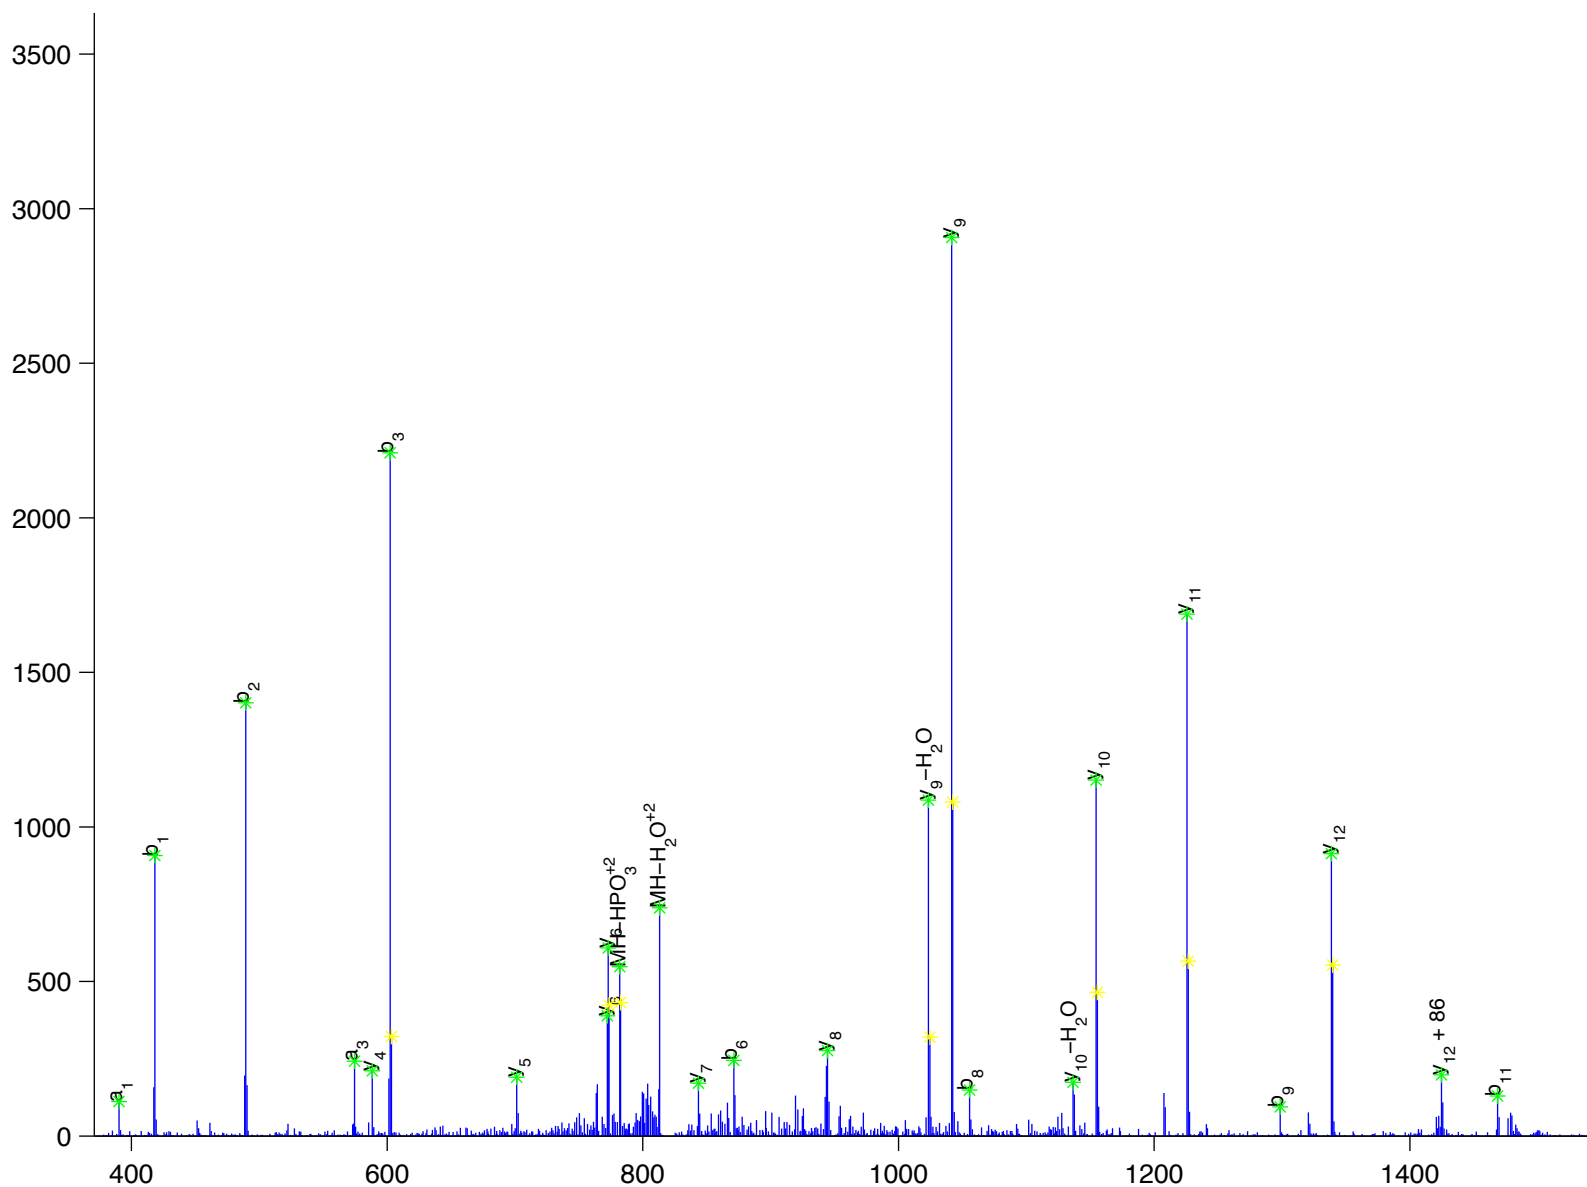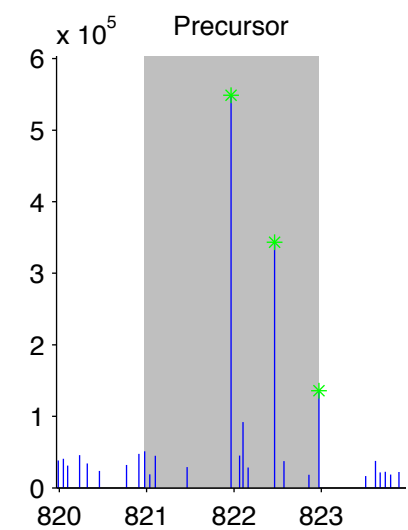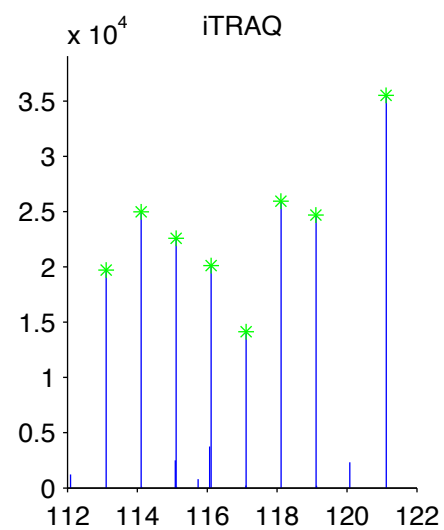

V[F]D[K]D[G]N[G]yI[S]A[A]E[L]R

calmodulin 2

Charge State: +3

Scan Number: 5776

File Name: 090806ptp1blivers\_M\_NC2.raw

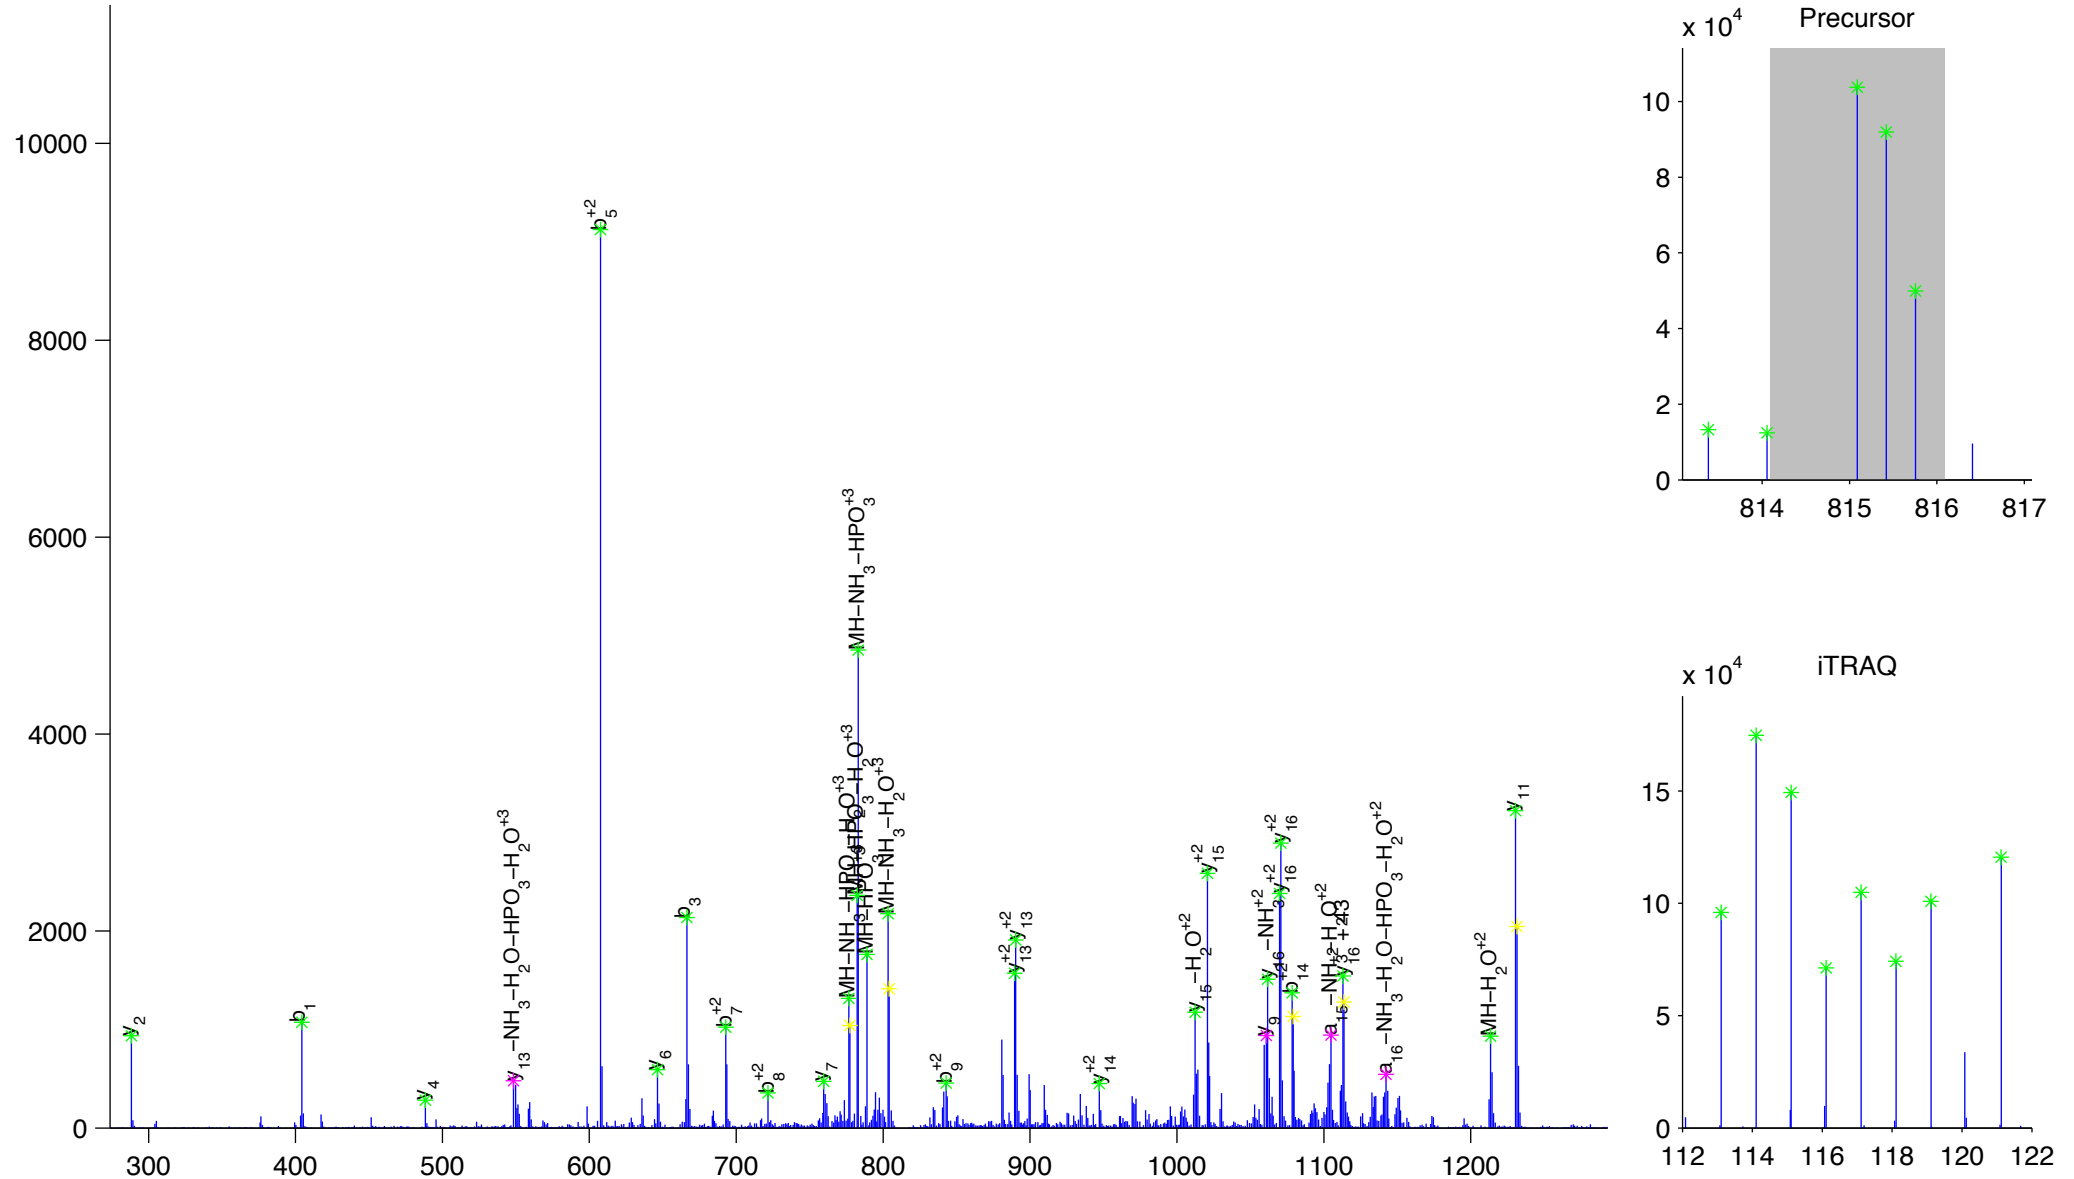

V[A]G[L]L[V]L[N]y[S]N[D]Y[N]H[W]L[A]T[K]

carbamoyl-phosphate synthetase 1

Charge State: +4

Scan Number: 11710

File Name: 090807ptp1blivers\_M\_HFD\_basal.raw

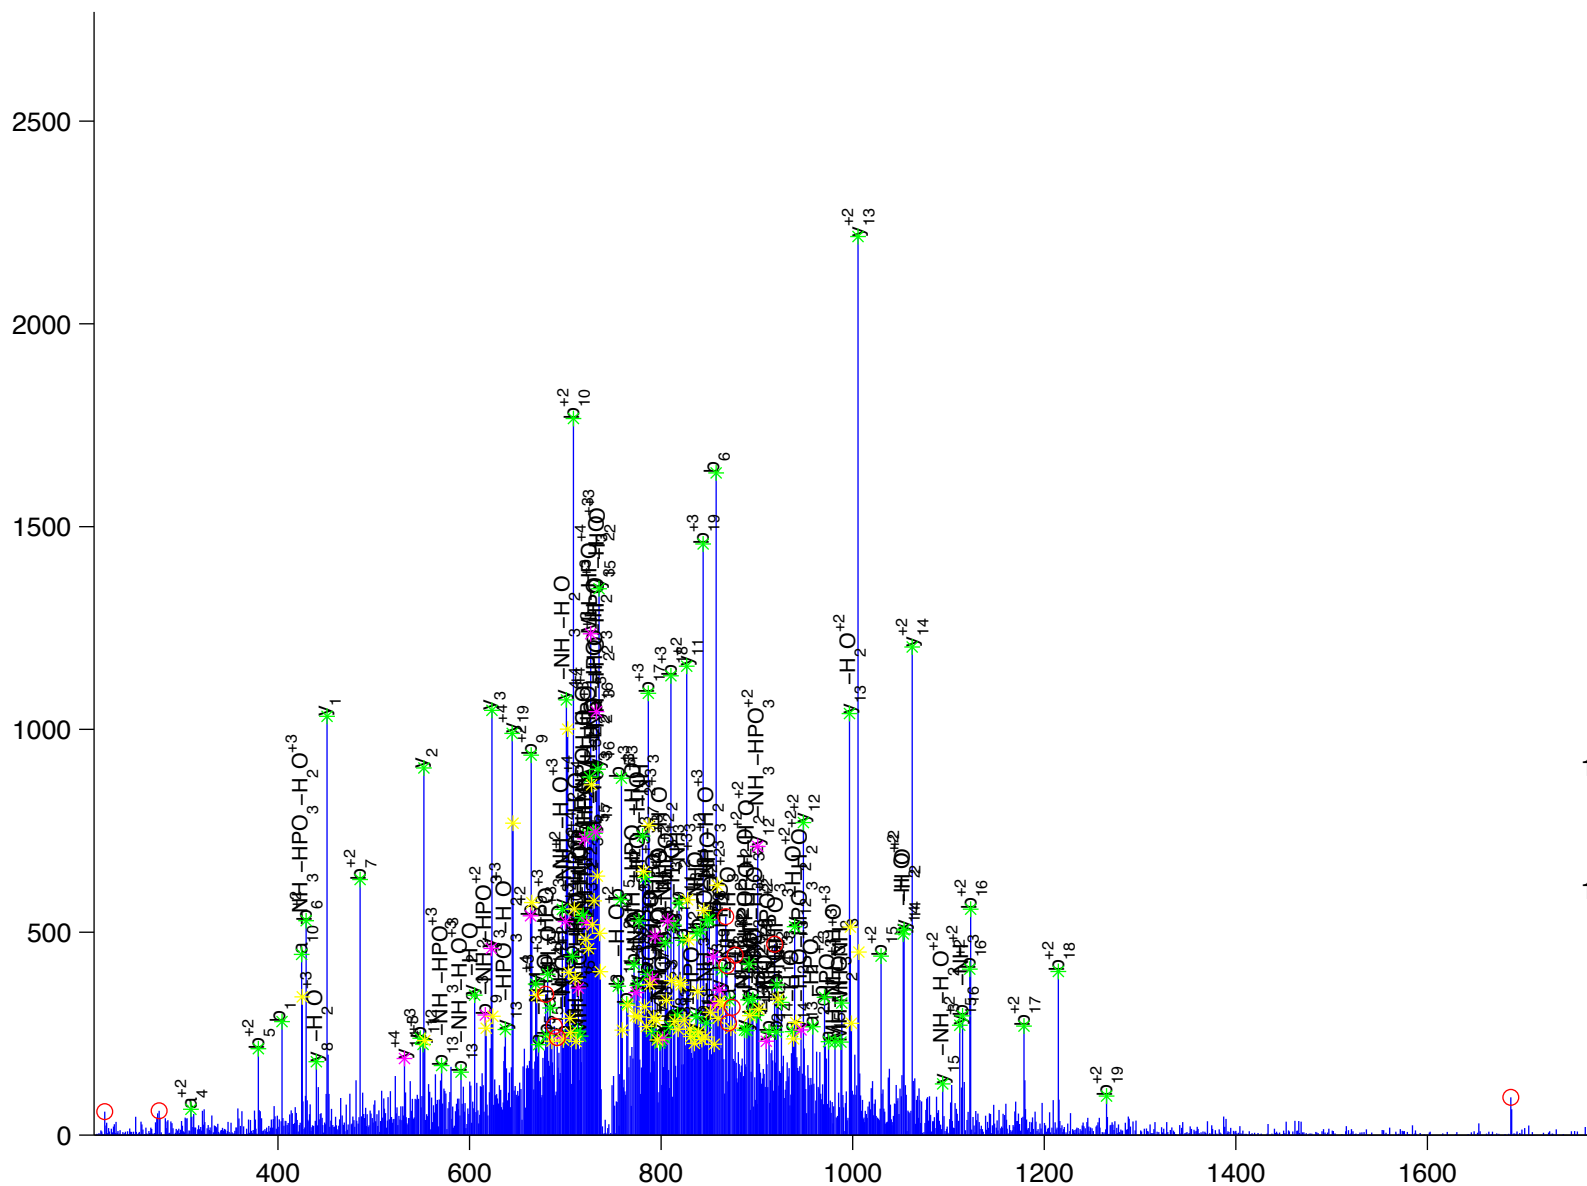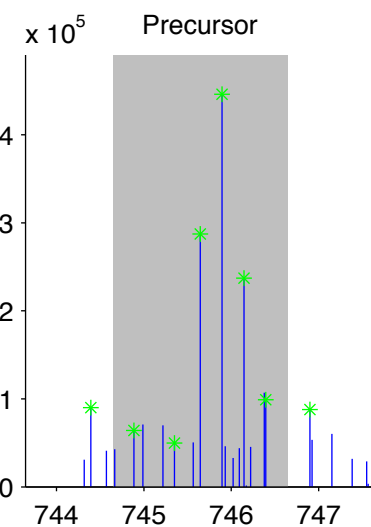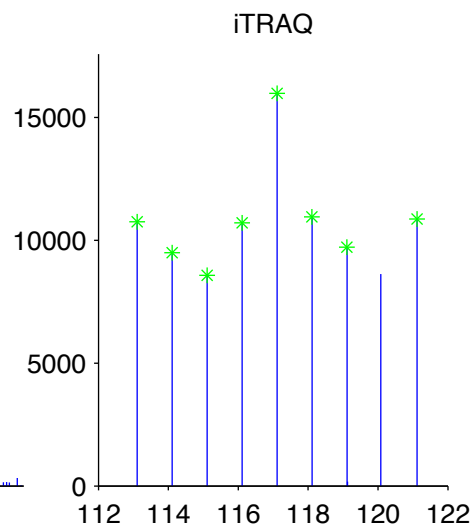

F [ V ] [ H ] [ D ] [ N ] [ y ] [ V ] [ I ] R

carbamoyl-phosphate synthetase 1

Charge State: +3

Scan Number: 4962

File Name: 091130ptp1blivers\_hfd\_basal2.raw

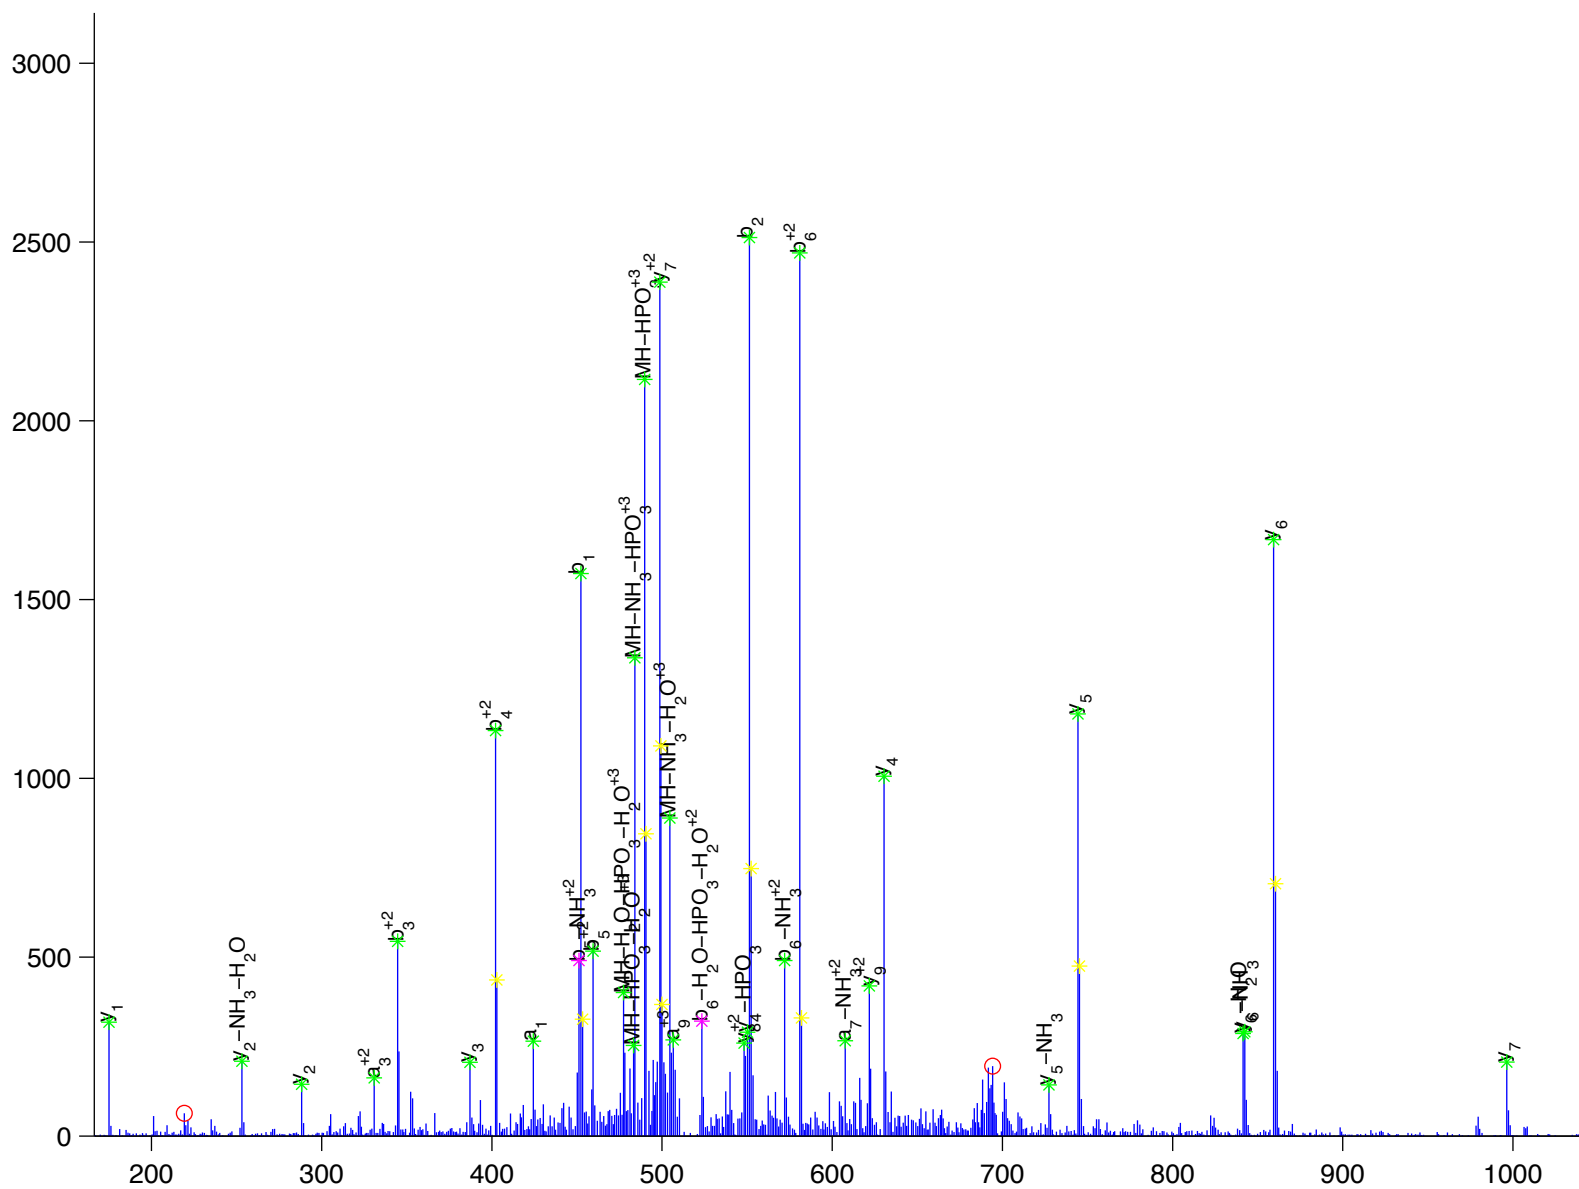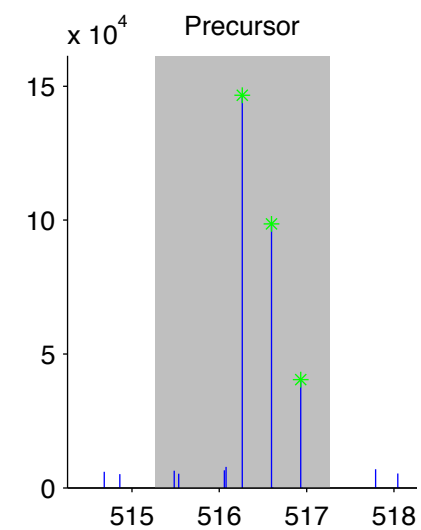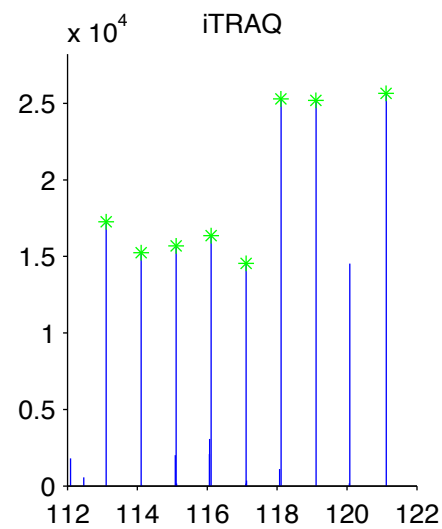



V[P]A[I]y[G]V[D]T]R

carbamoyl-phosphate synthetase 1

Charge State: +2

Scan Number: 5804

File Name: 091130ptp1blivers\_hfd\_basal2.raw

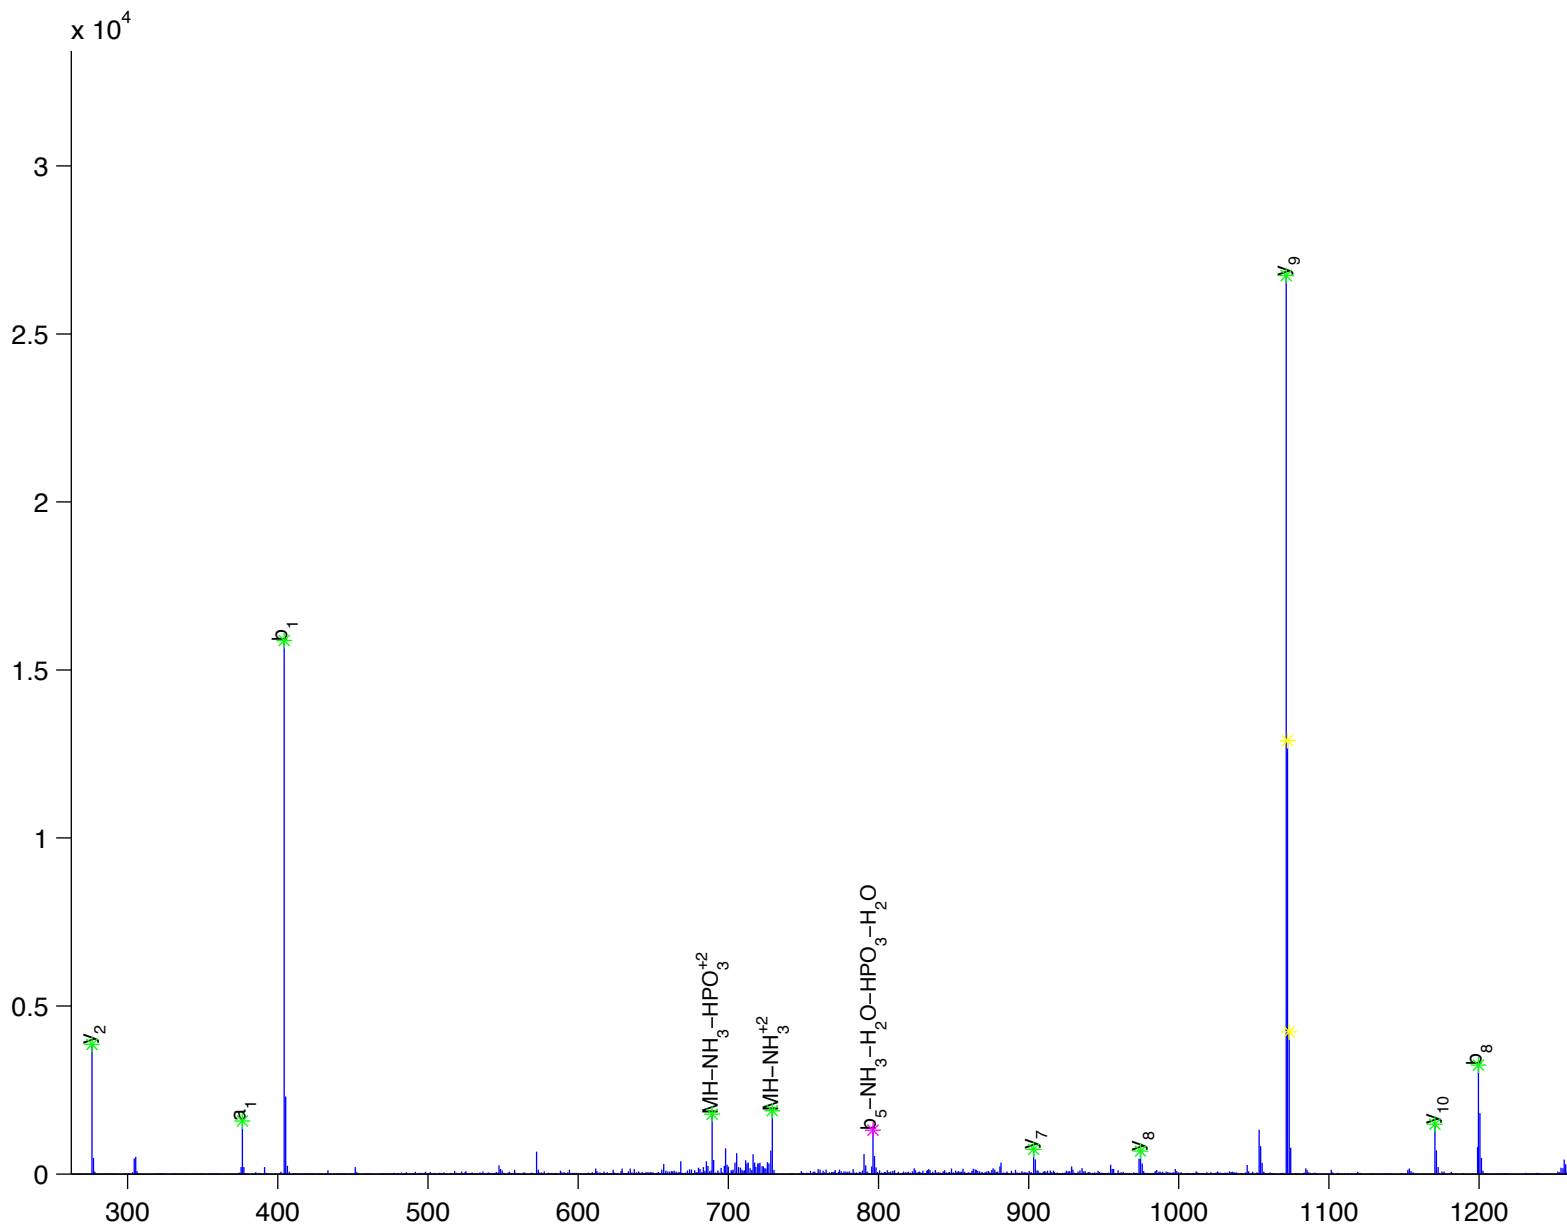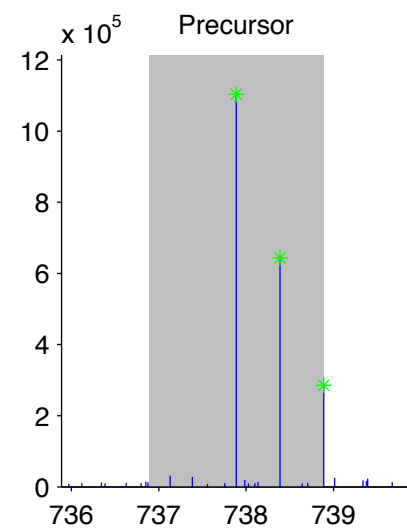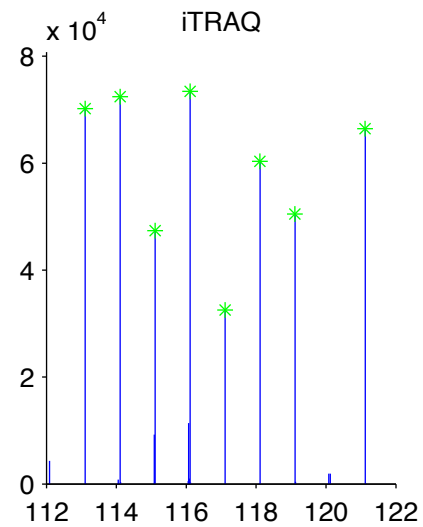

S[A]y[A]L[G]G[L]G[S]G[I]C[P]N]K

carbamoyl-phosphate synthetase 1

Charge State: +3

Scan Number: 6308

File Name: 090806ptp1blivers\_M\_NC2.raw

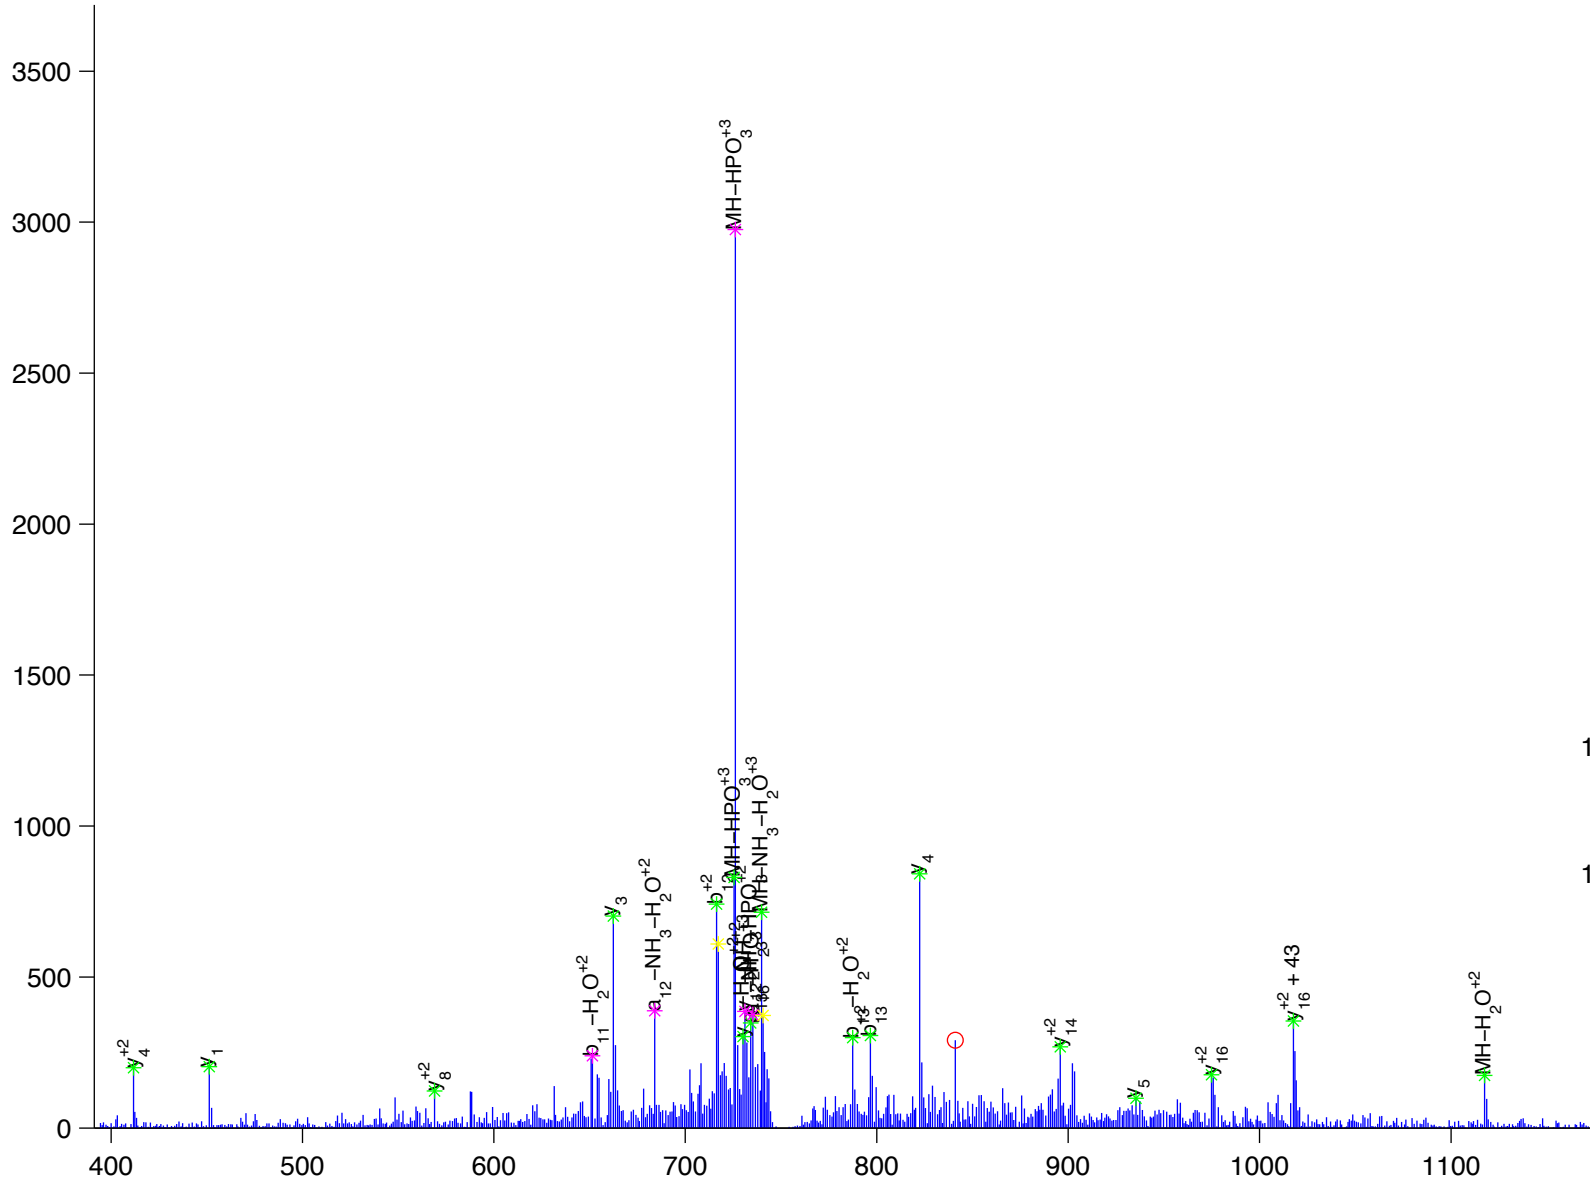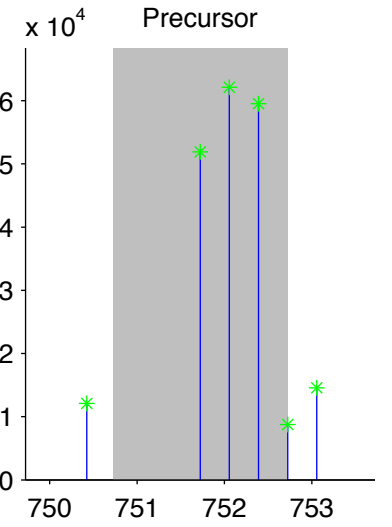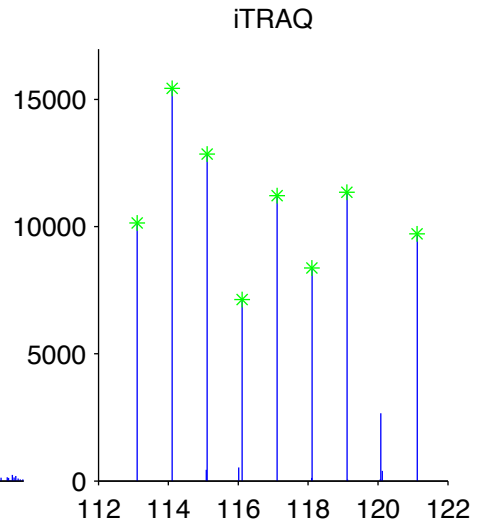

y [ A A E L H L V H W N T ] K

carbonic anhydrase 2

Charge State: +4

Scan Number: 5844

File Name: 091130ptp1blivers\_hfd\_basal2.raw

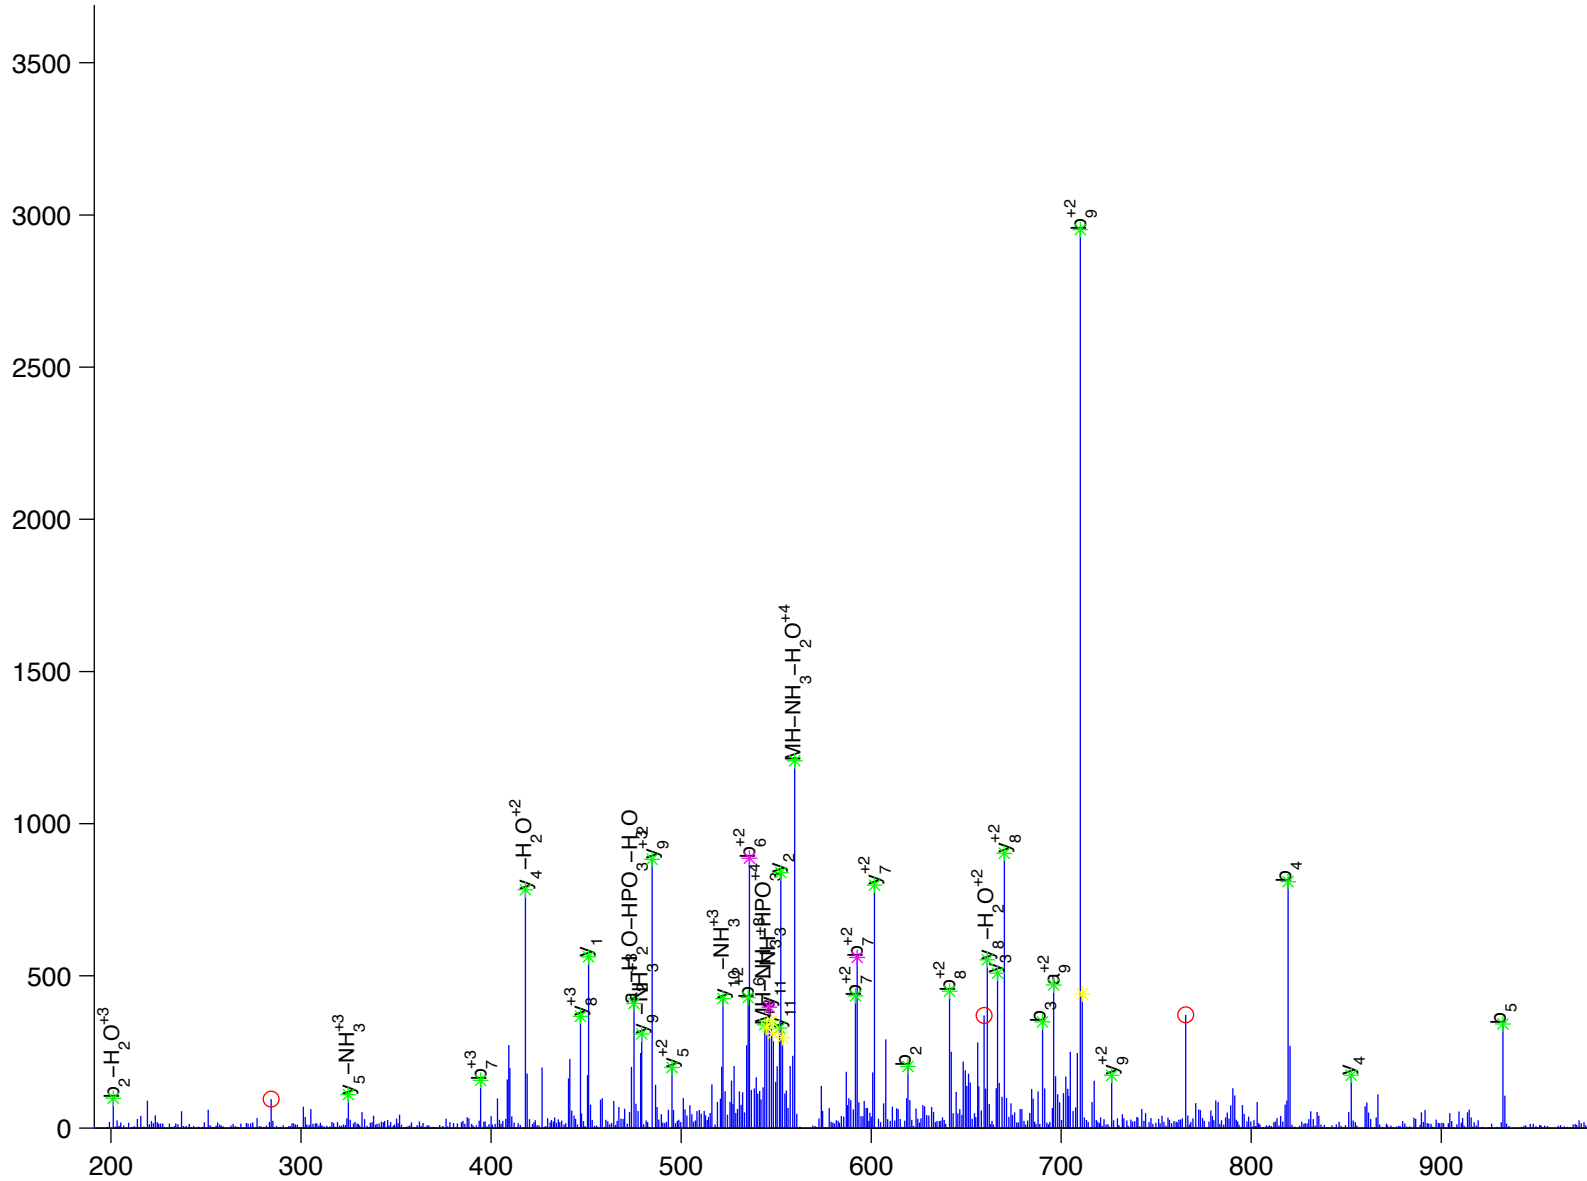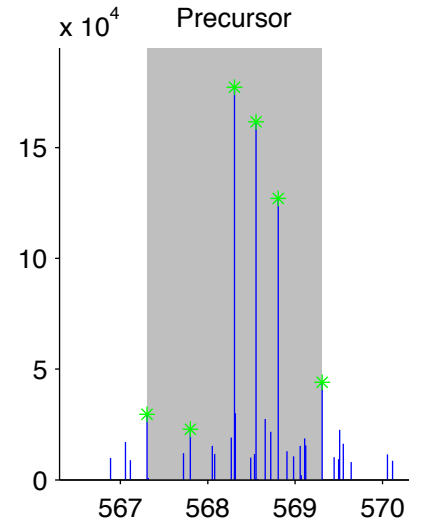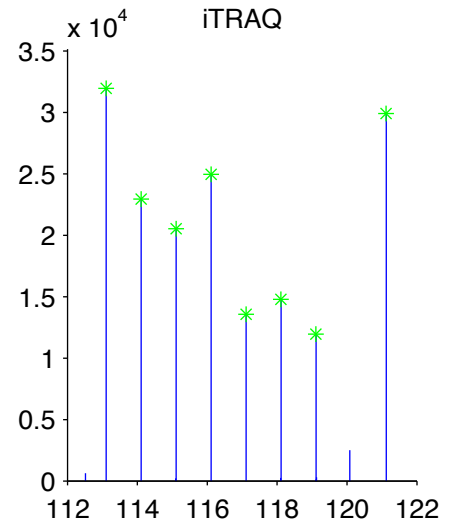

V V F D D T y D R

carbonic anhydrase 3

Charge State: +2

Scan Number: 5693

File Name: 091130ptp1blivers\_hfd\_basal2.raw

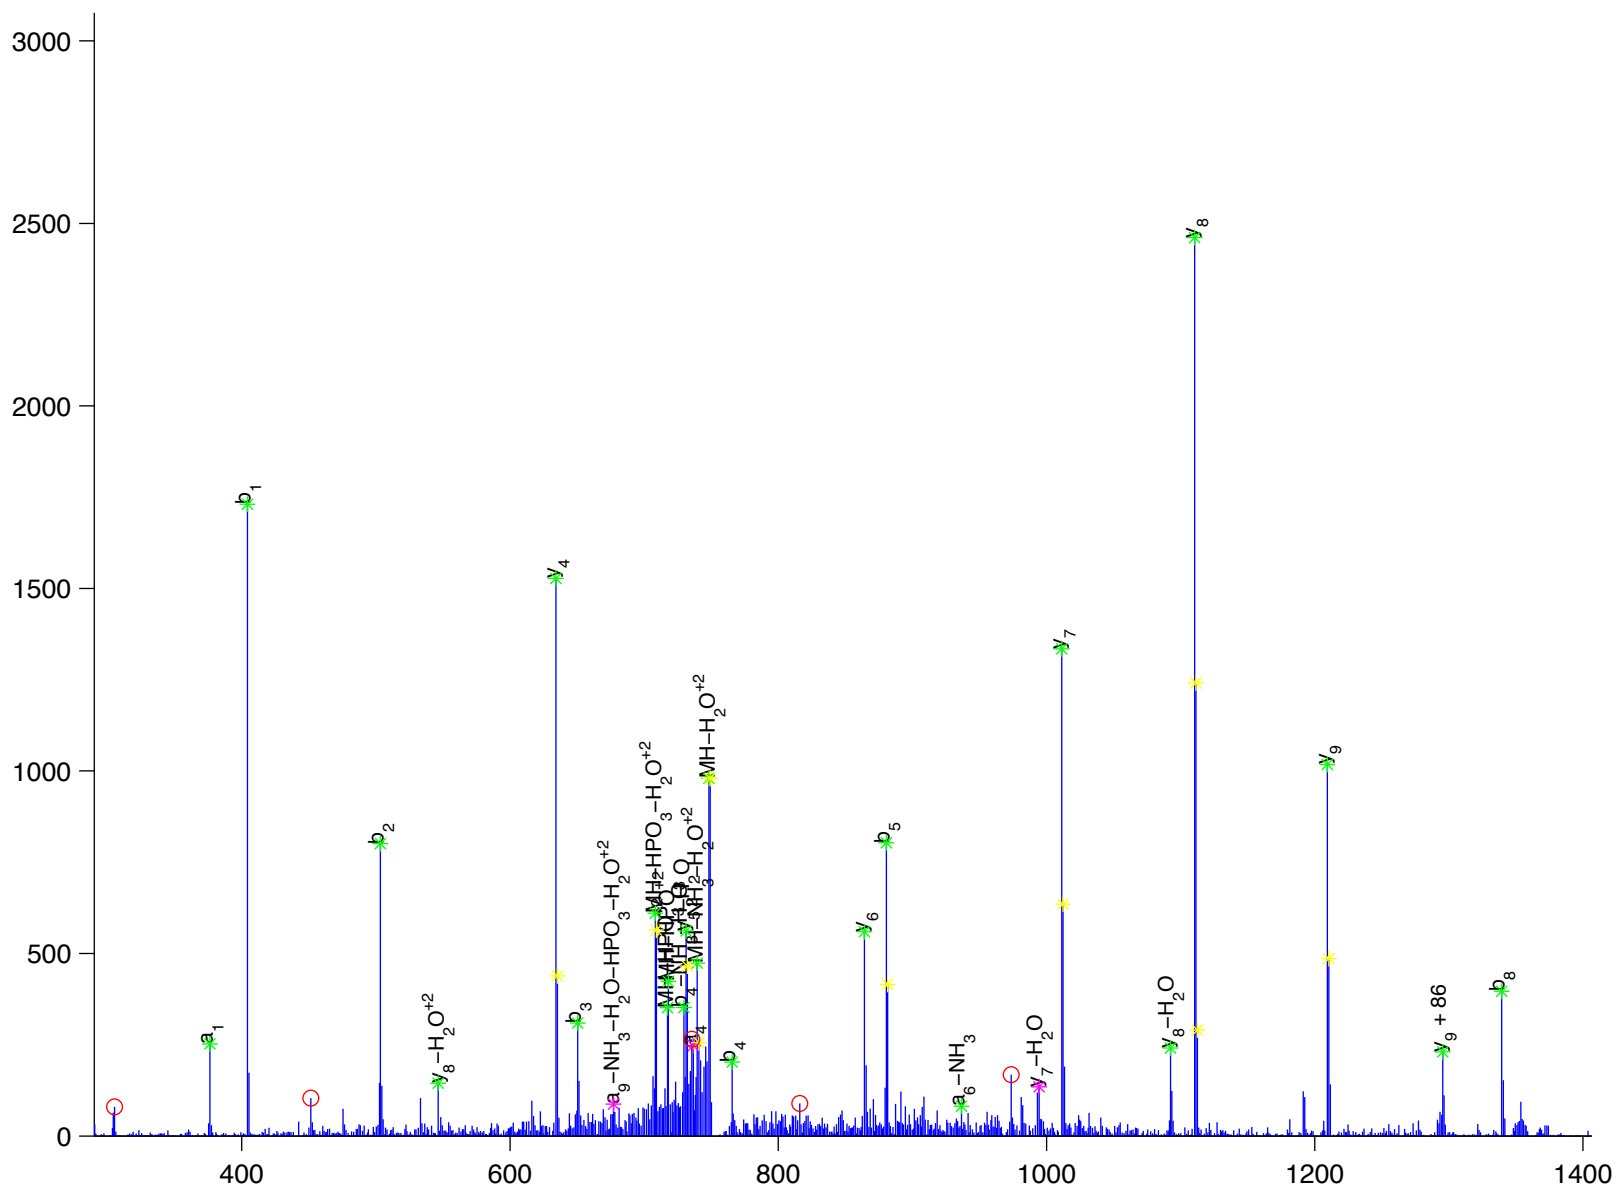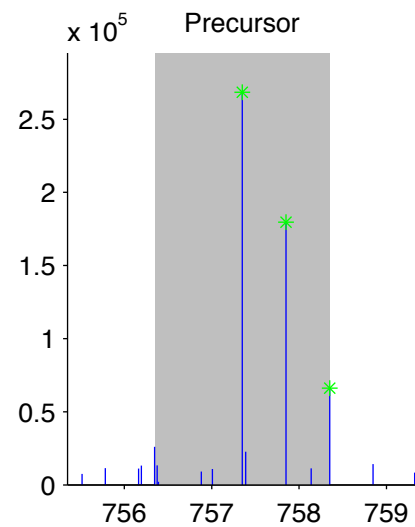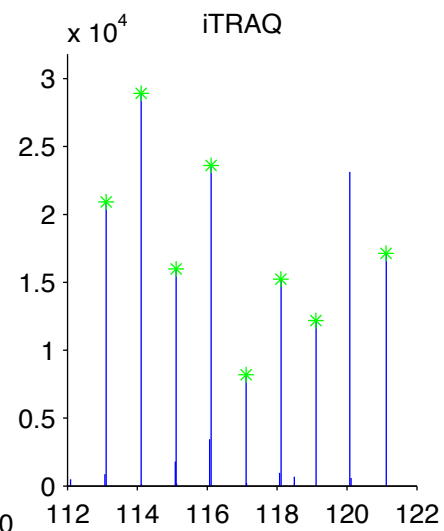

$\left[ \begin{array}{l} A \\ T \end{array} \right] \left[ \begin{array}{l} E \\ T \end{array} \right] \left[ \begin{array}{l} V \\ y \end{array} \right] \left[ \begin{array}{l} S \\ E \end{array} \right] \left[ \begin{array}{l} V \\ K \end{array} \right]$

carcinoembryonic antigen-related cell adhesion molecule 1 isoform 1

Charge State: +3

Scan Number: 3997

File Name: 090806ptp1blivers\_M\_NC2.raw

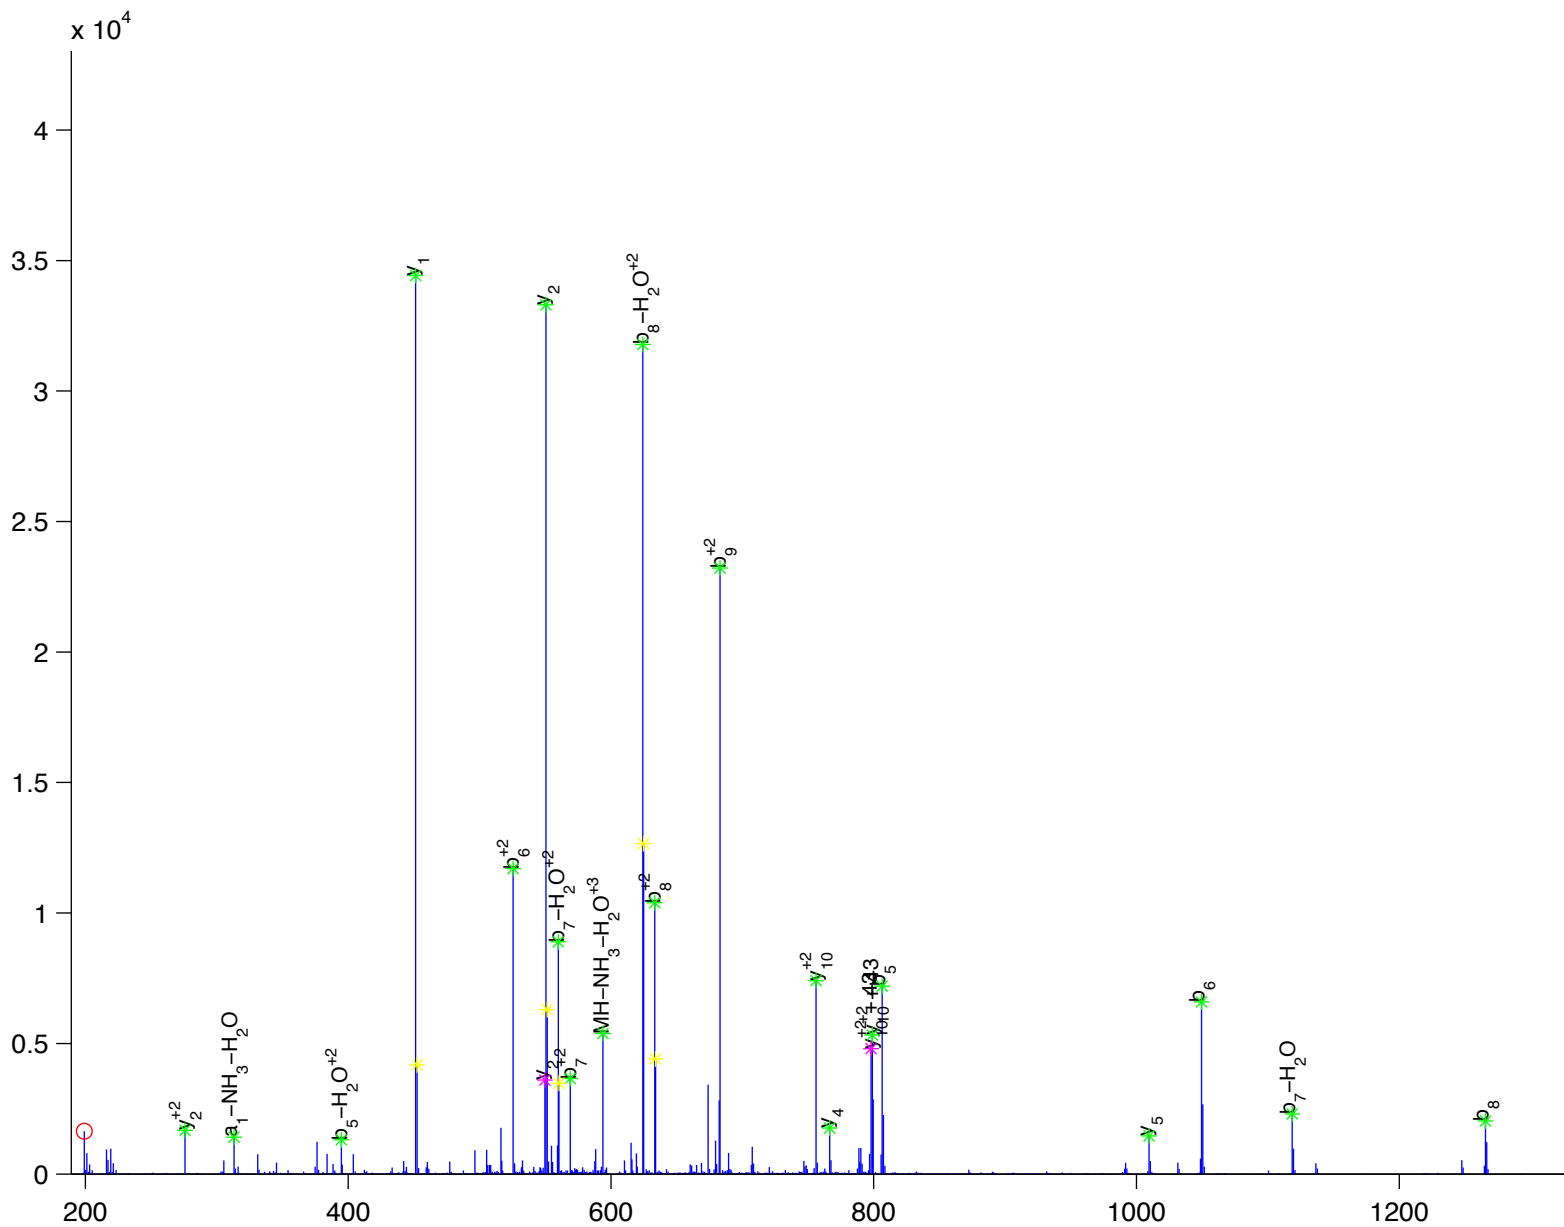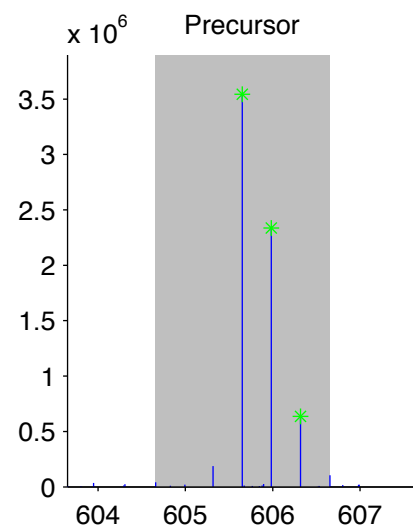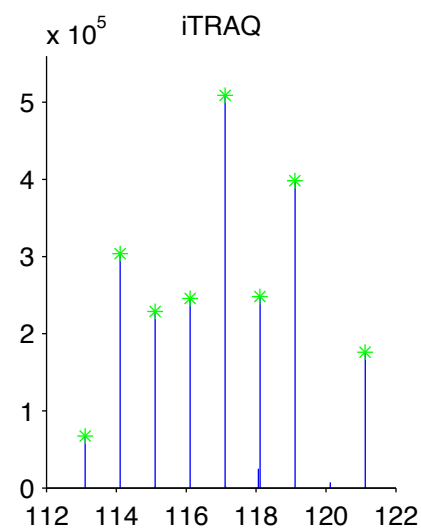

N [ T ] y [ N ] Q [ T ] A [ L ] D [ I ] V [ N ] Q [ F ] T [ T ] S [ Q ] A [ S ] R

case-interacting protein 2

Charge State: +3

Scan Number: 11759

File Name: 090807ptp1blivers\_M\_HFD\_basal.raw

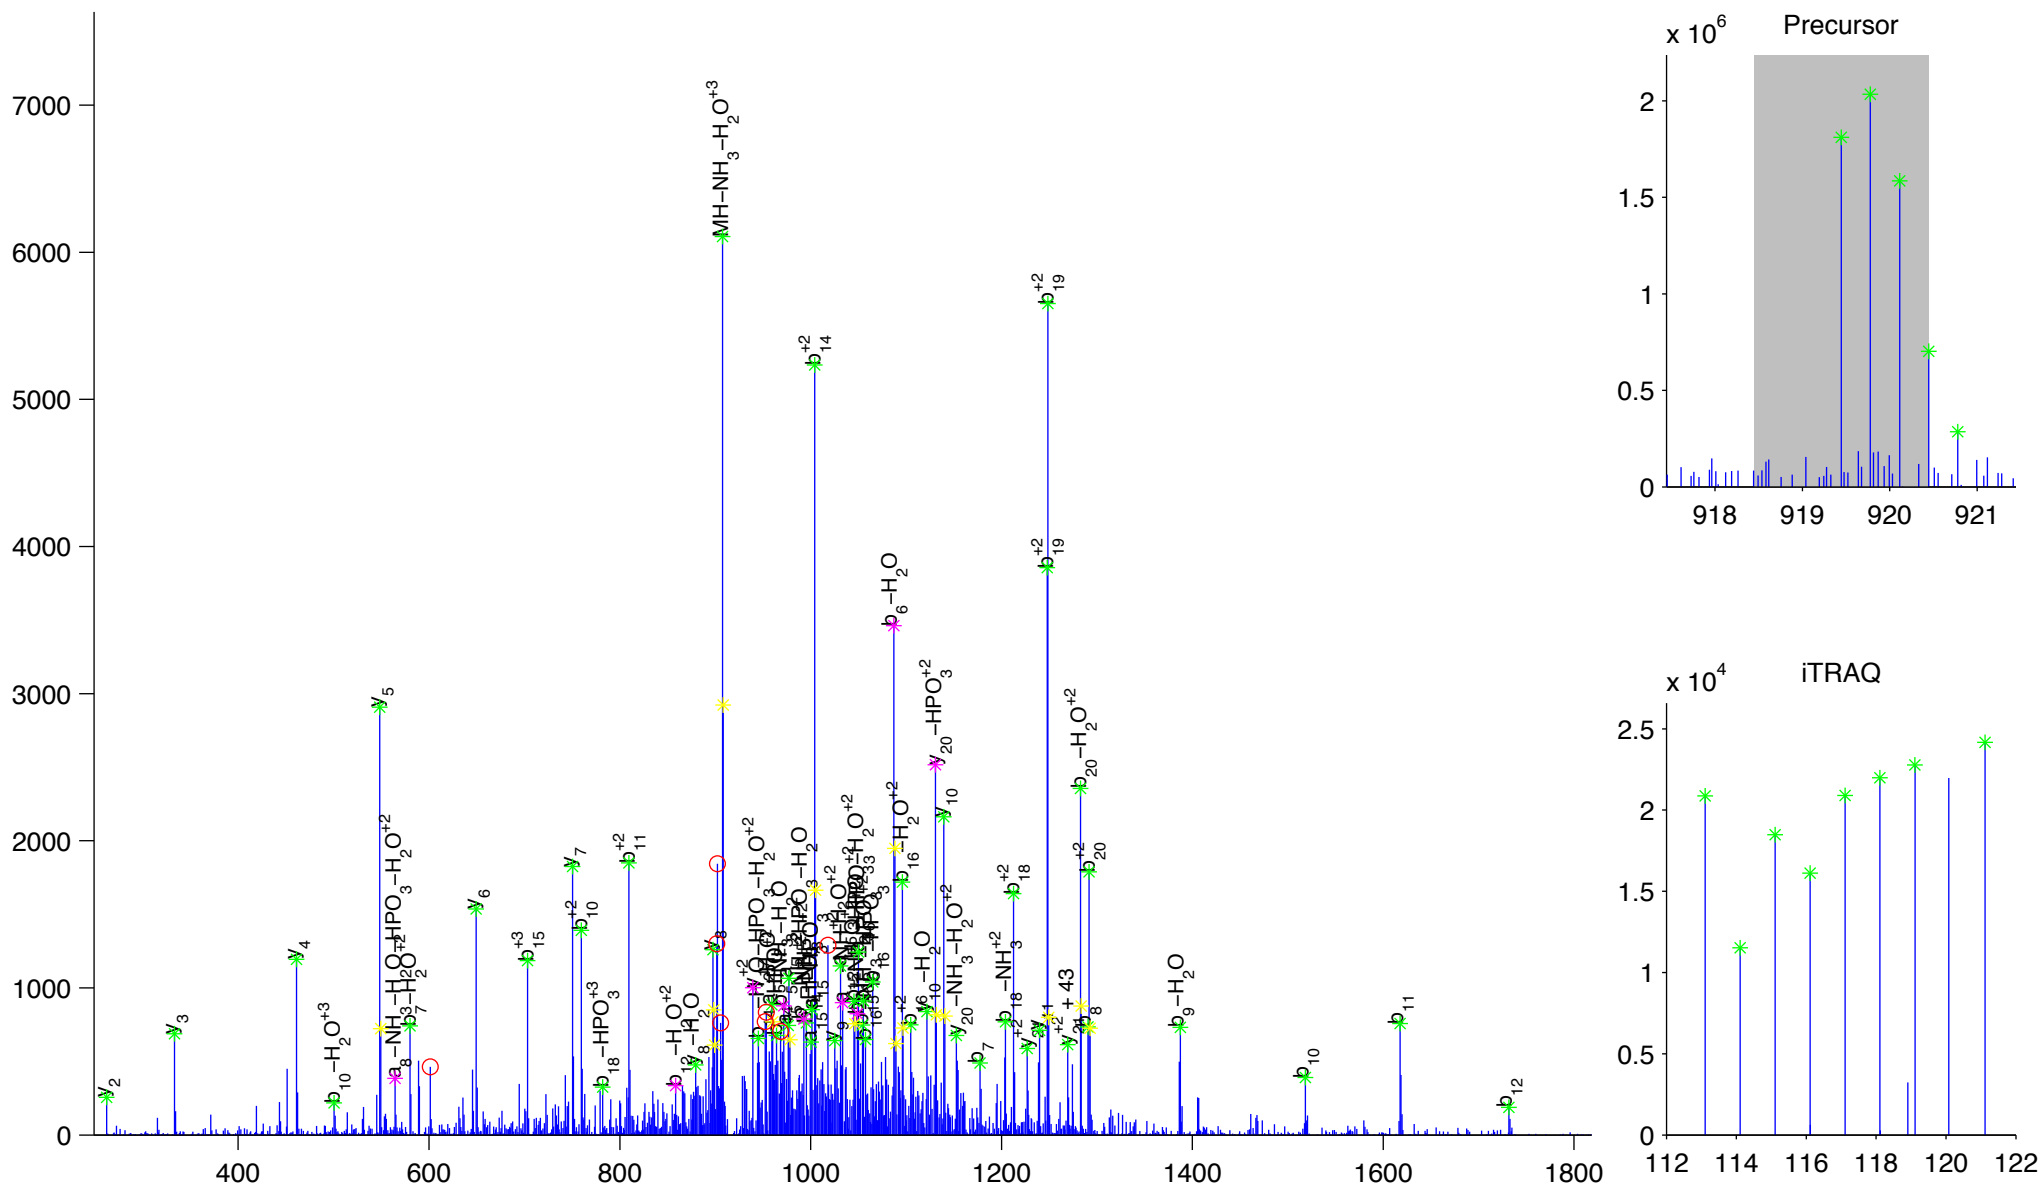

L[V]N[A]D[G]E[A]V[y]C]K

catalase

Charge State: +3

Scan Number: 4468

File Name: 090806ptp1blivers\_M\_NC2.raw

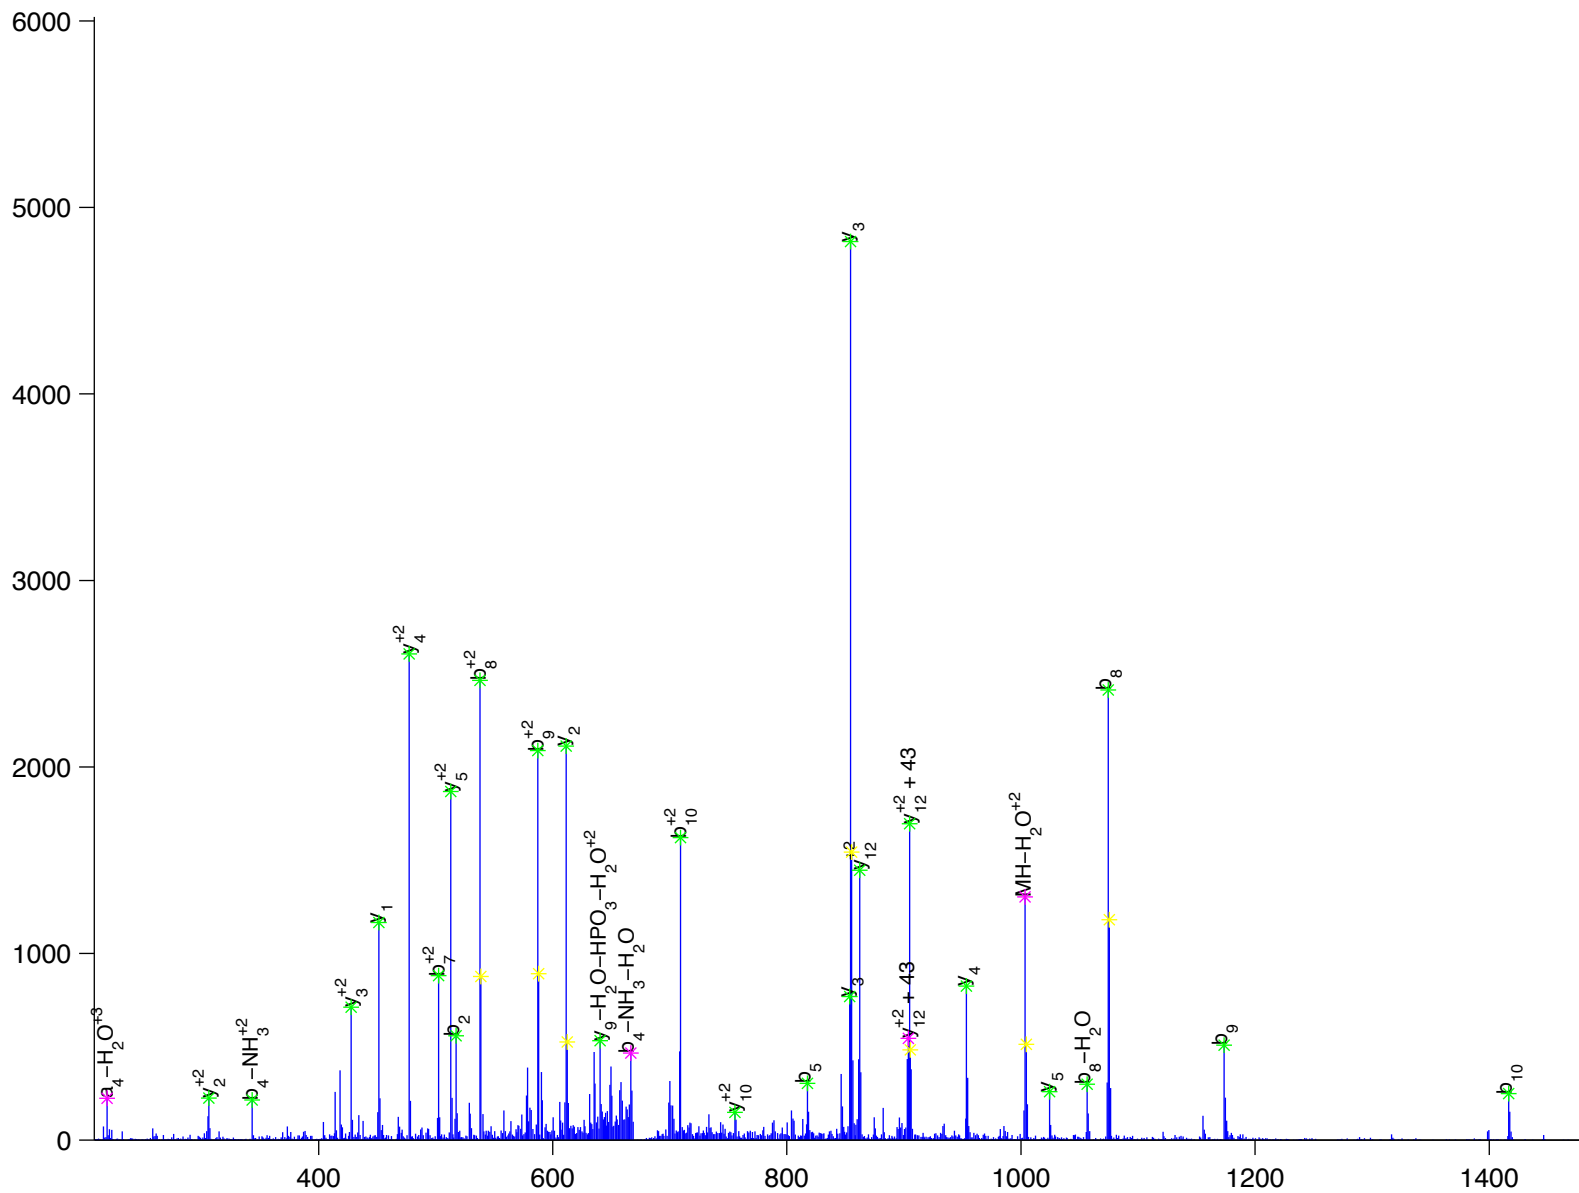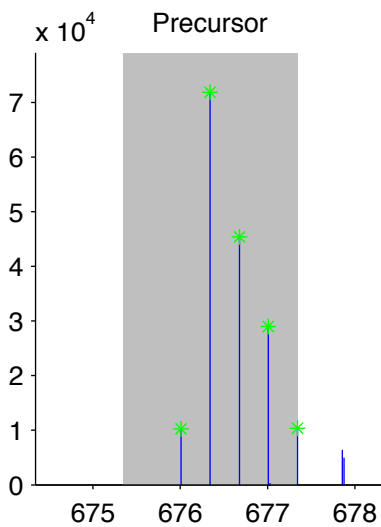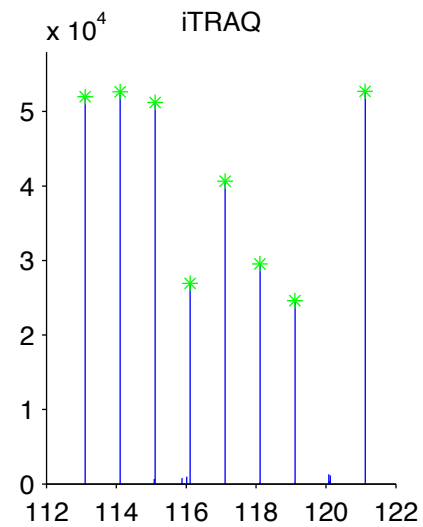

G [ A ] G [ A ] F [ G ] y [ F ] E [ V ] T [ H ] D [ I ] T [ R ]

catalase

Charge State: +3

Scan Number: 5893

File Name: 100908ptp1blivers\_ncHFD3\_basal.raw

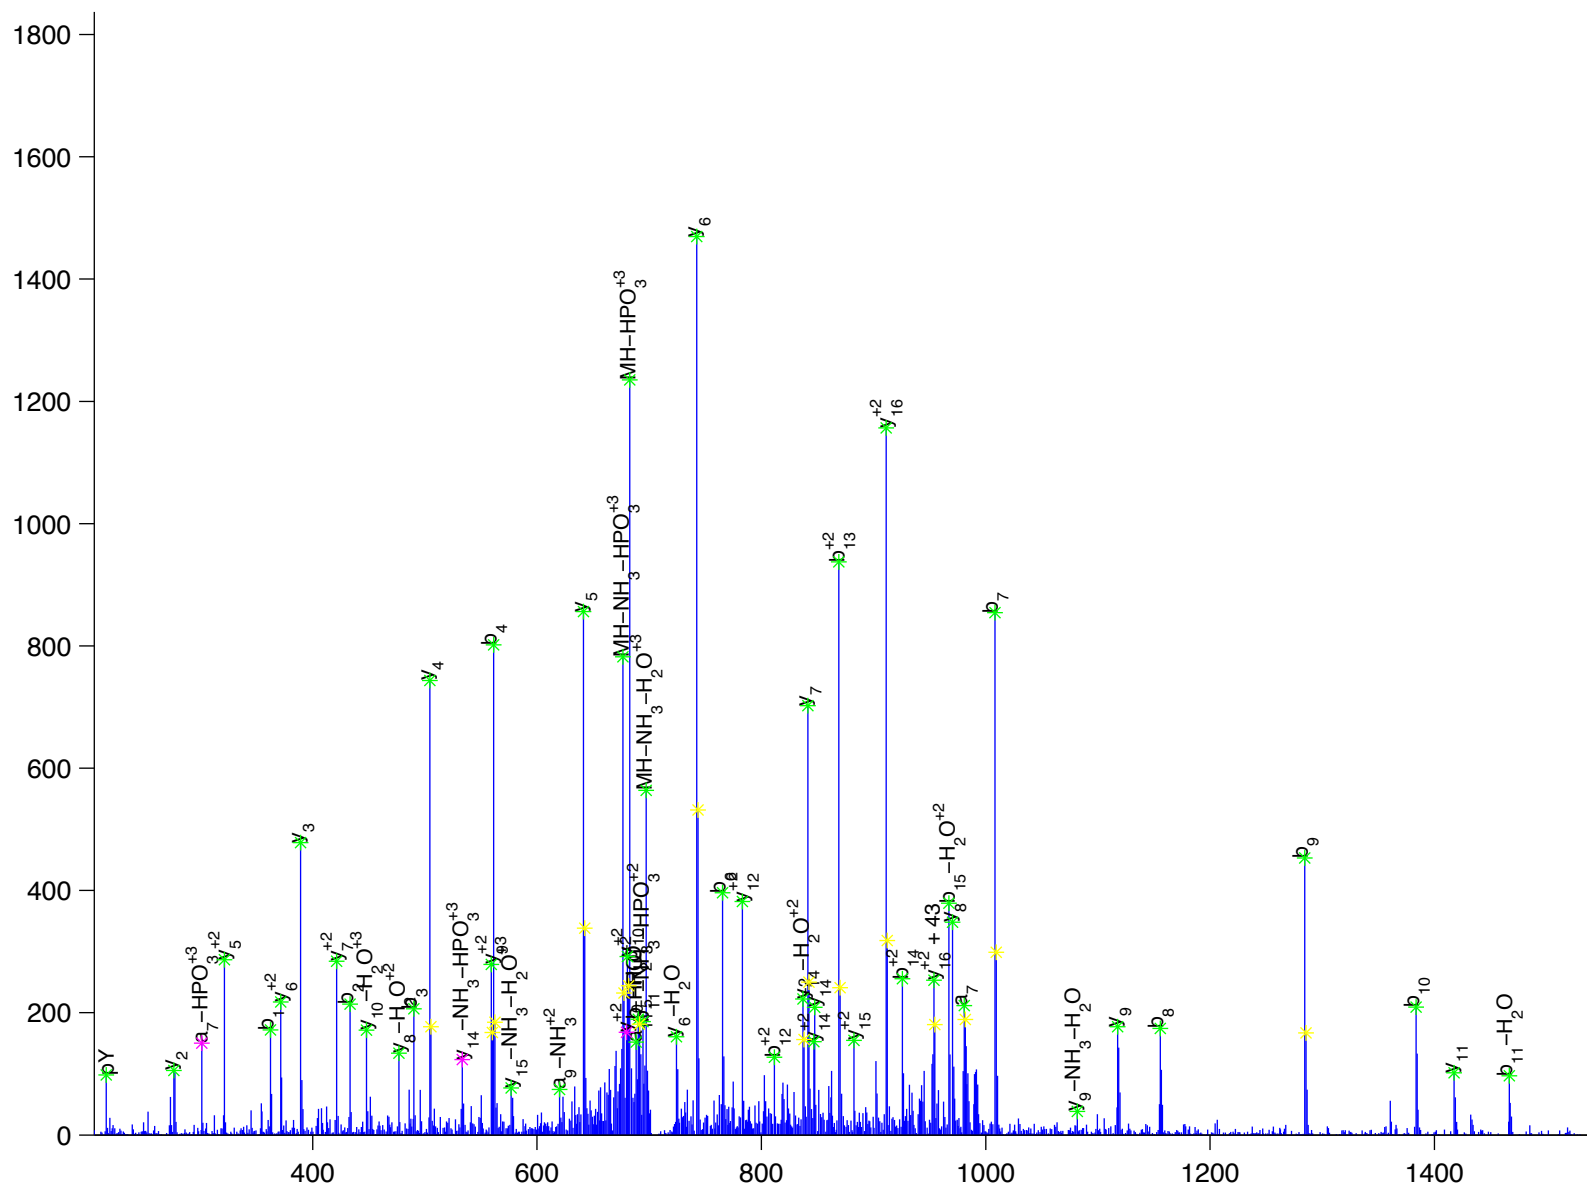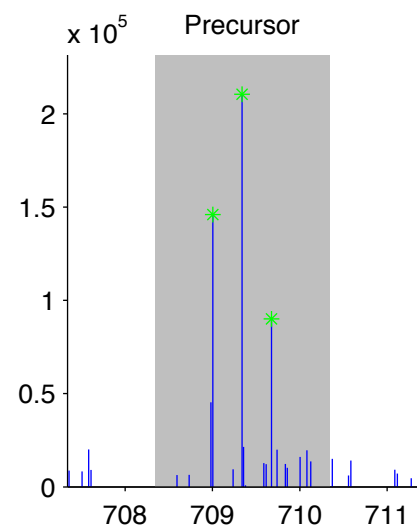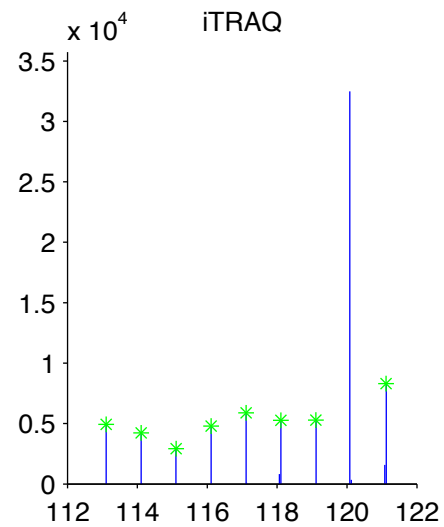



N [ A ] G [ N ] E [ Q ] D [ L ] G [ I ] Q [ y ] K

catenin alpha 1

Charge State: +3

Scan Number: 4762

File Name: 091130ptp1blivers\_hfd\_basal2.raw

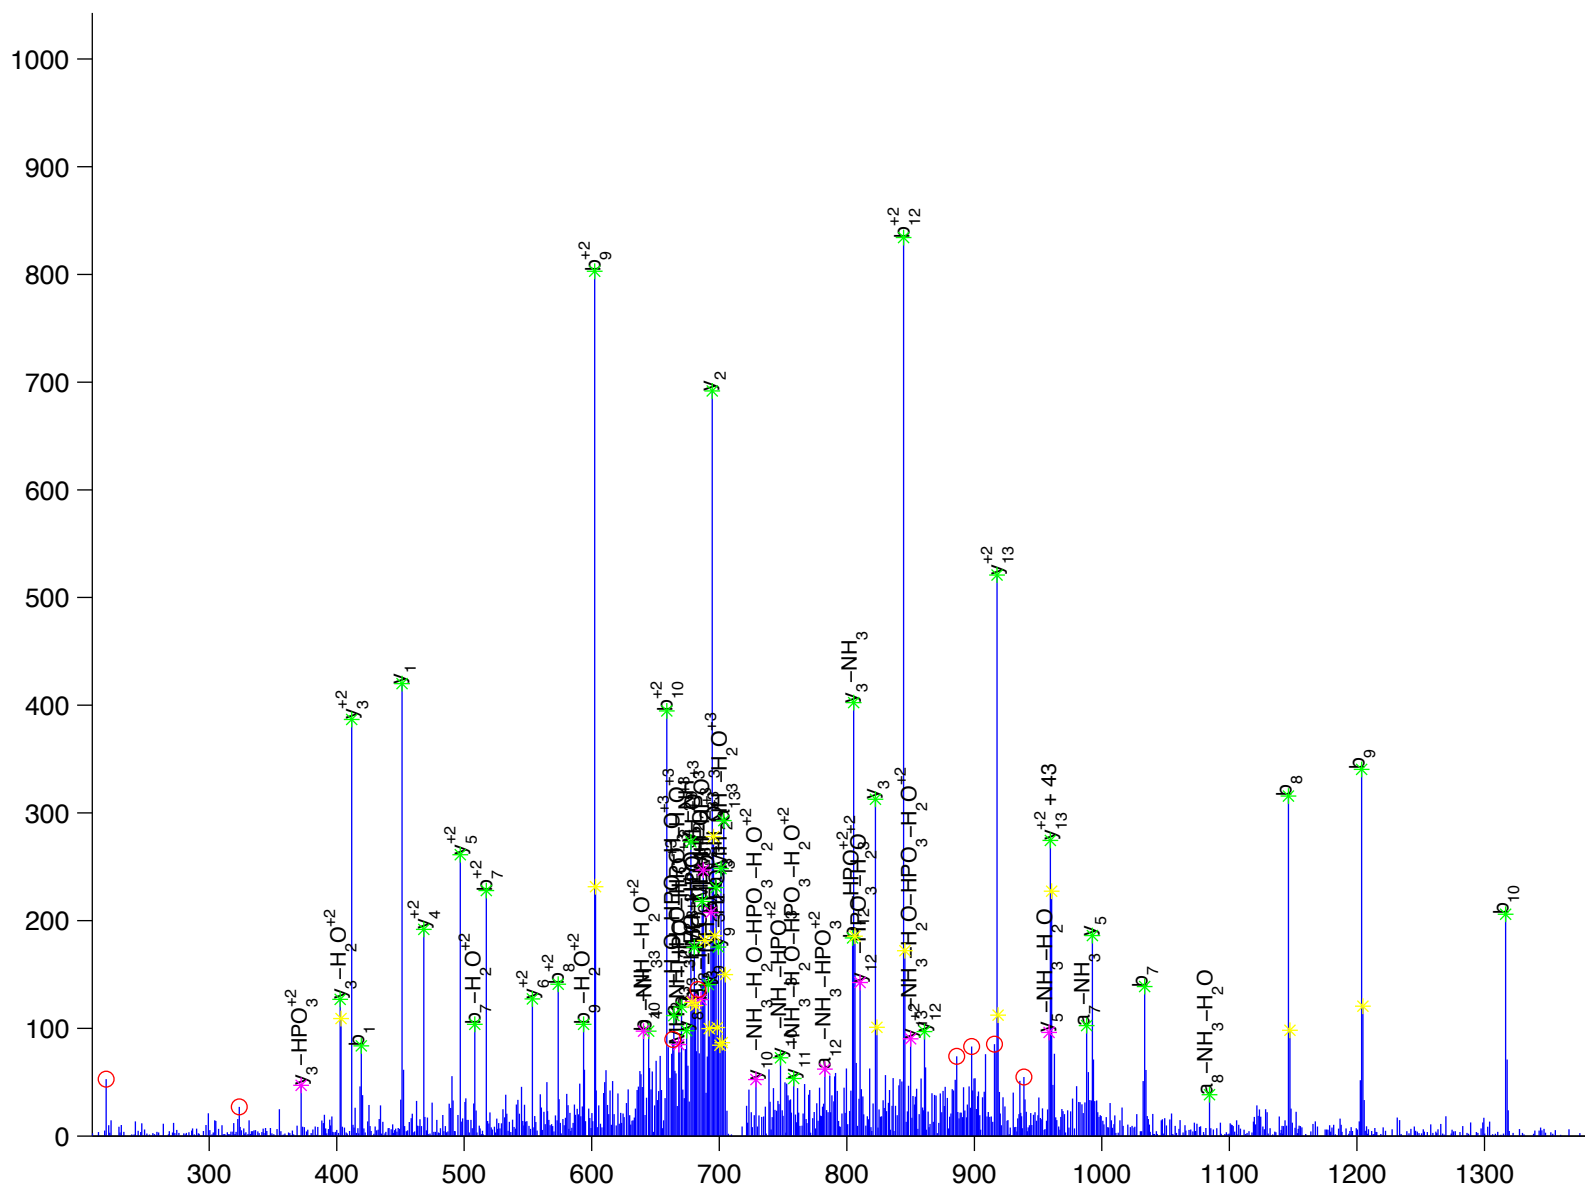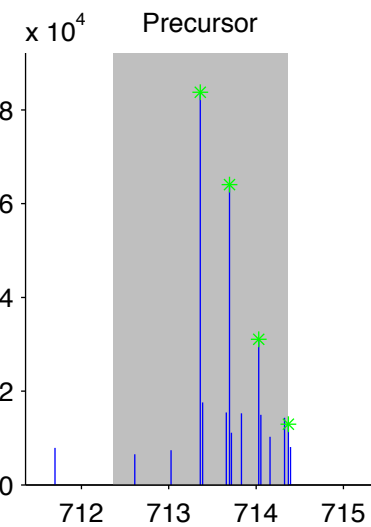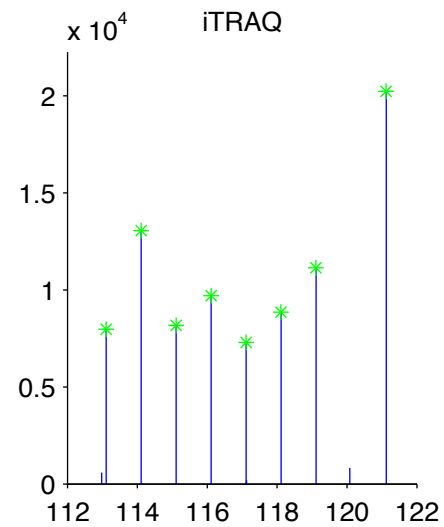

L [ V ] y [ D ] G [ I ] R

catenin alpha 1

Charge State: +

Scan Number: 5676

File Name: 091130ptp1blivers\_hfd\_basal2.raw

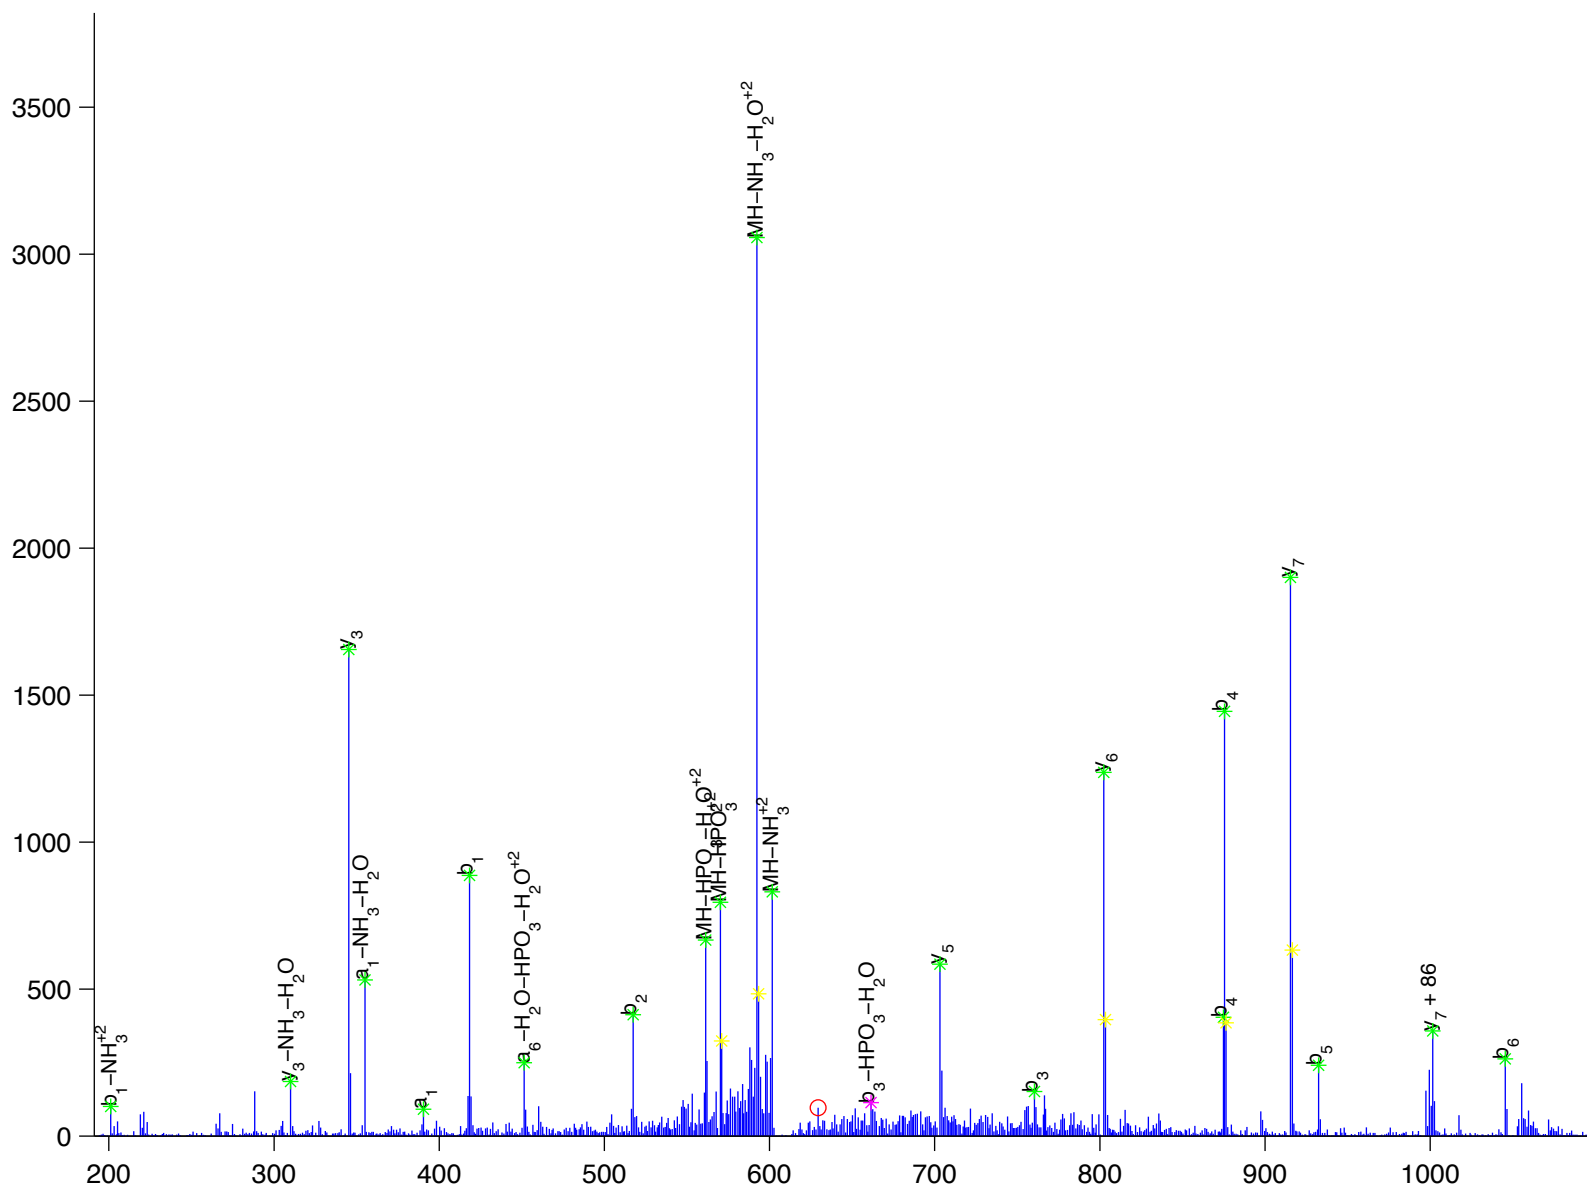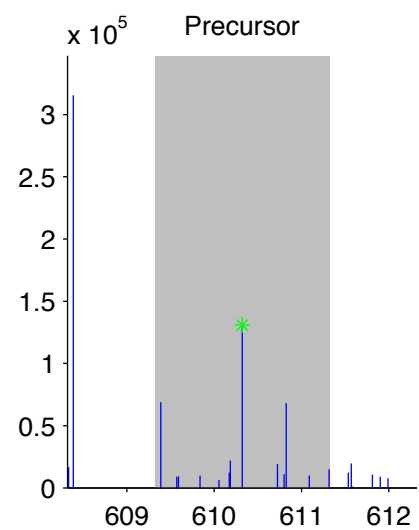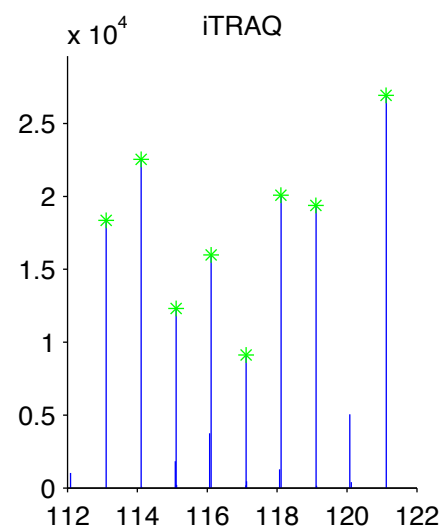

S  
 [ L ]  
 [ D ]  
 [ N ]  
 [ N ]  
 y  
 [ S ]  
 [ T ]  
 [ L ]  
 [ N ]  
 [ E ]  
 R

catenin, delta 1 isoform 1

Charge State: +3

Scan Number: 3308

File Name: 100908ptp1blivers\_ncHFD3\_basal.raw

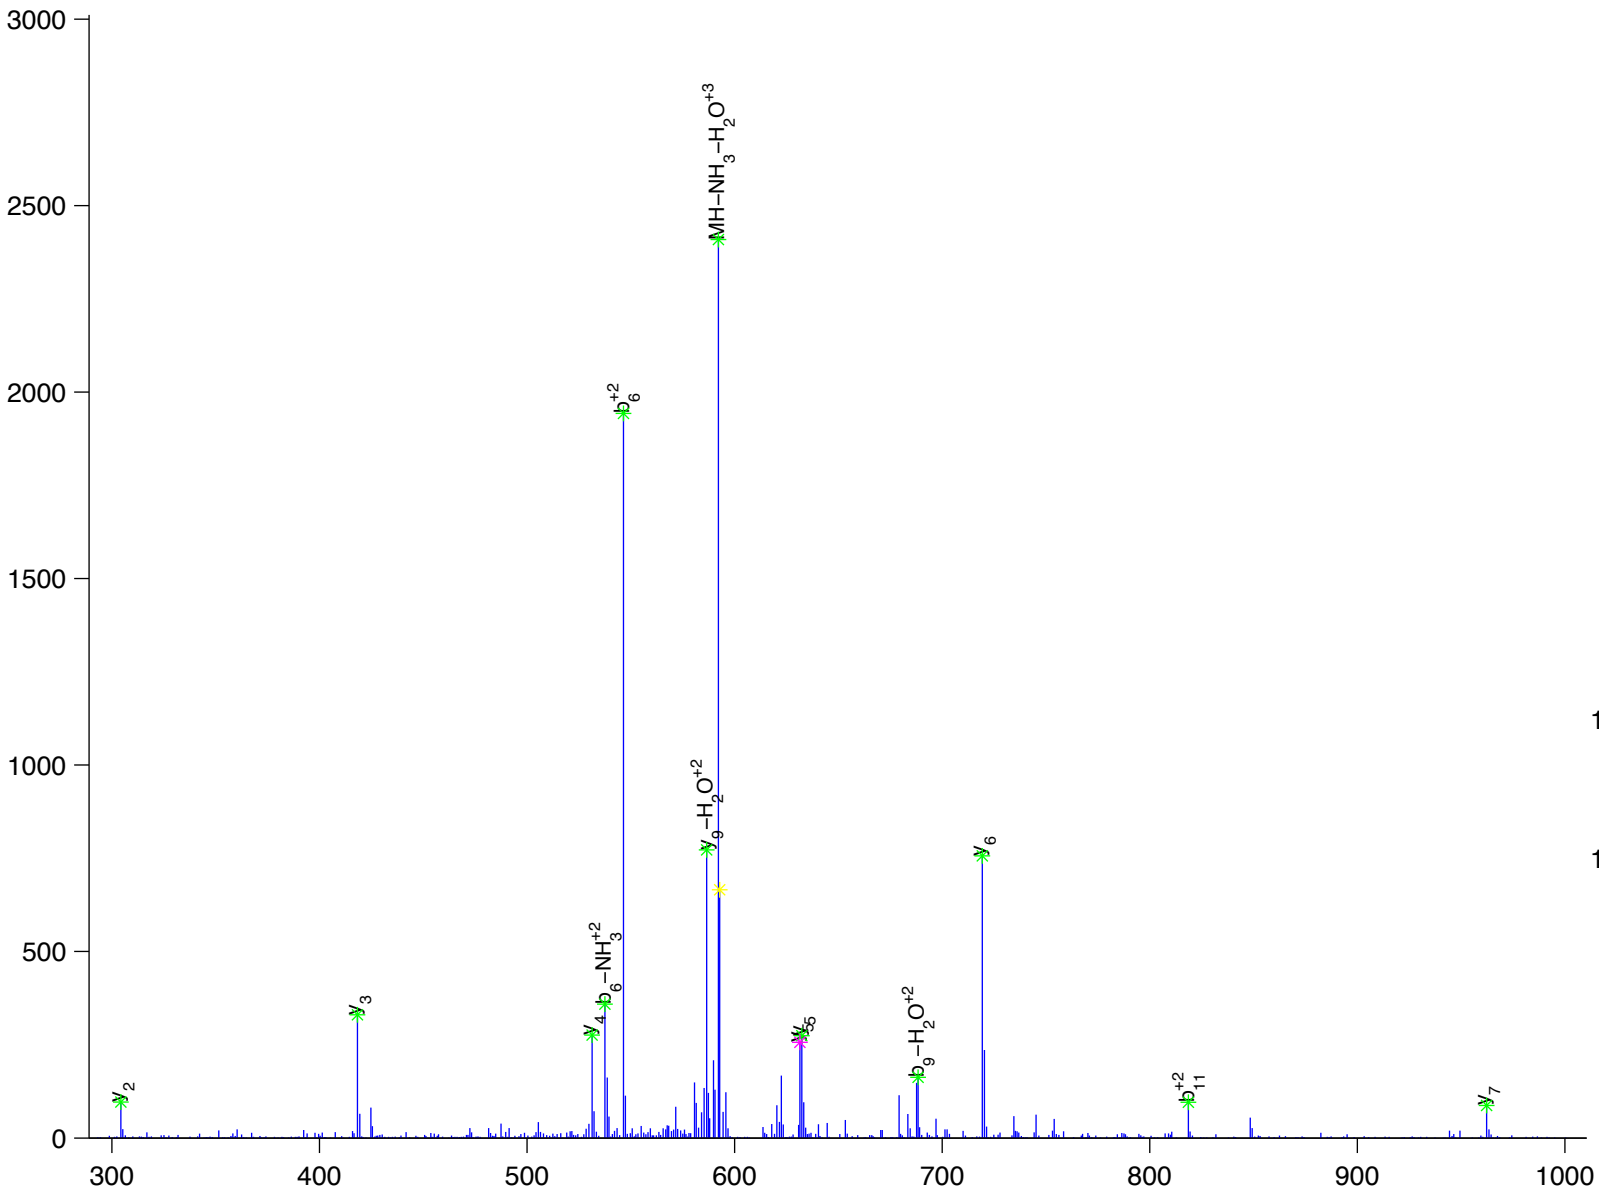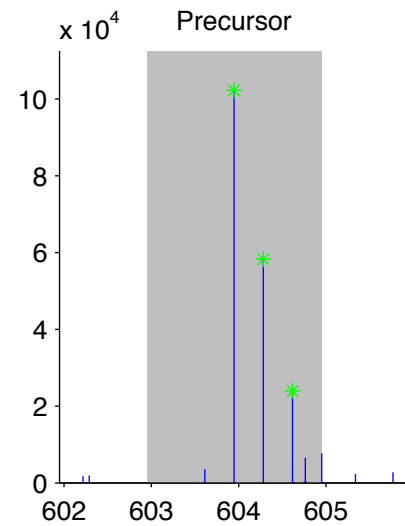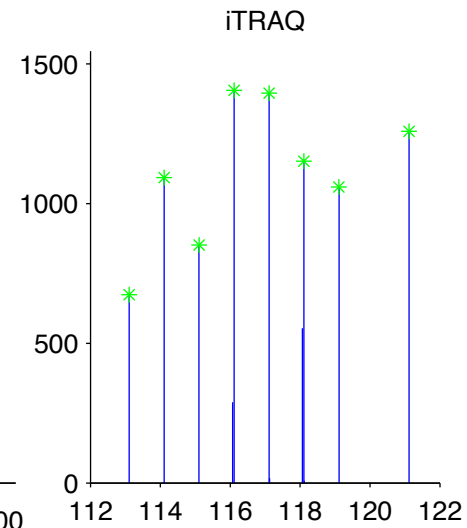

L [ N ] G [ P ] Q [ D ] H [ N ] H [ L ] L [ y ] S [ T ] I [ P ] R

catenin, delta 1 isoform 1

Charge State: +4

Scan Number: 5172

File Name: 091130ptp1blivers\_hfd\_basal2.raw

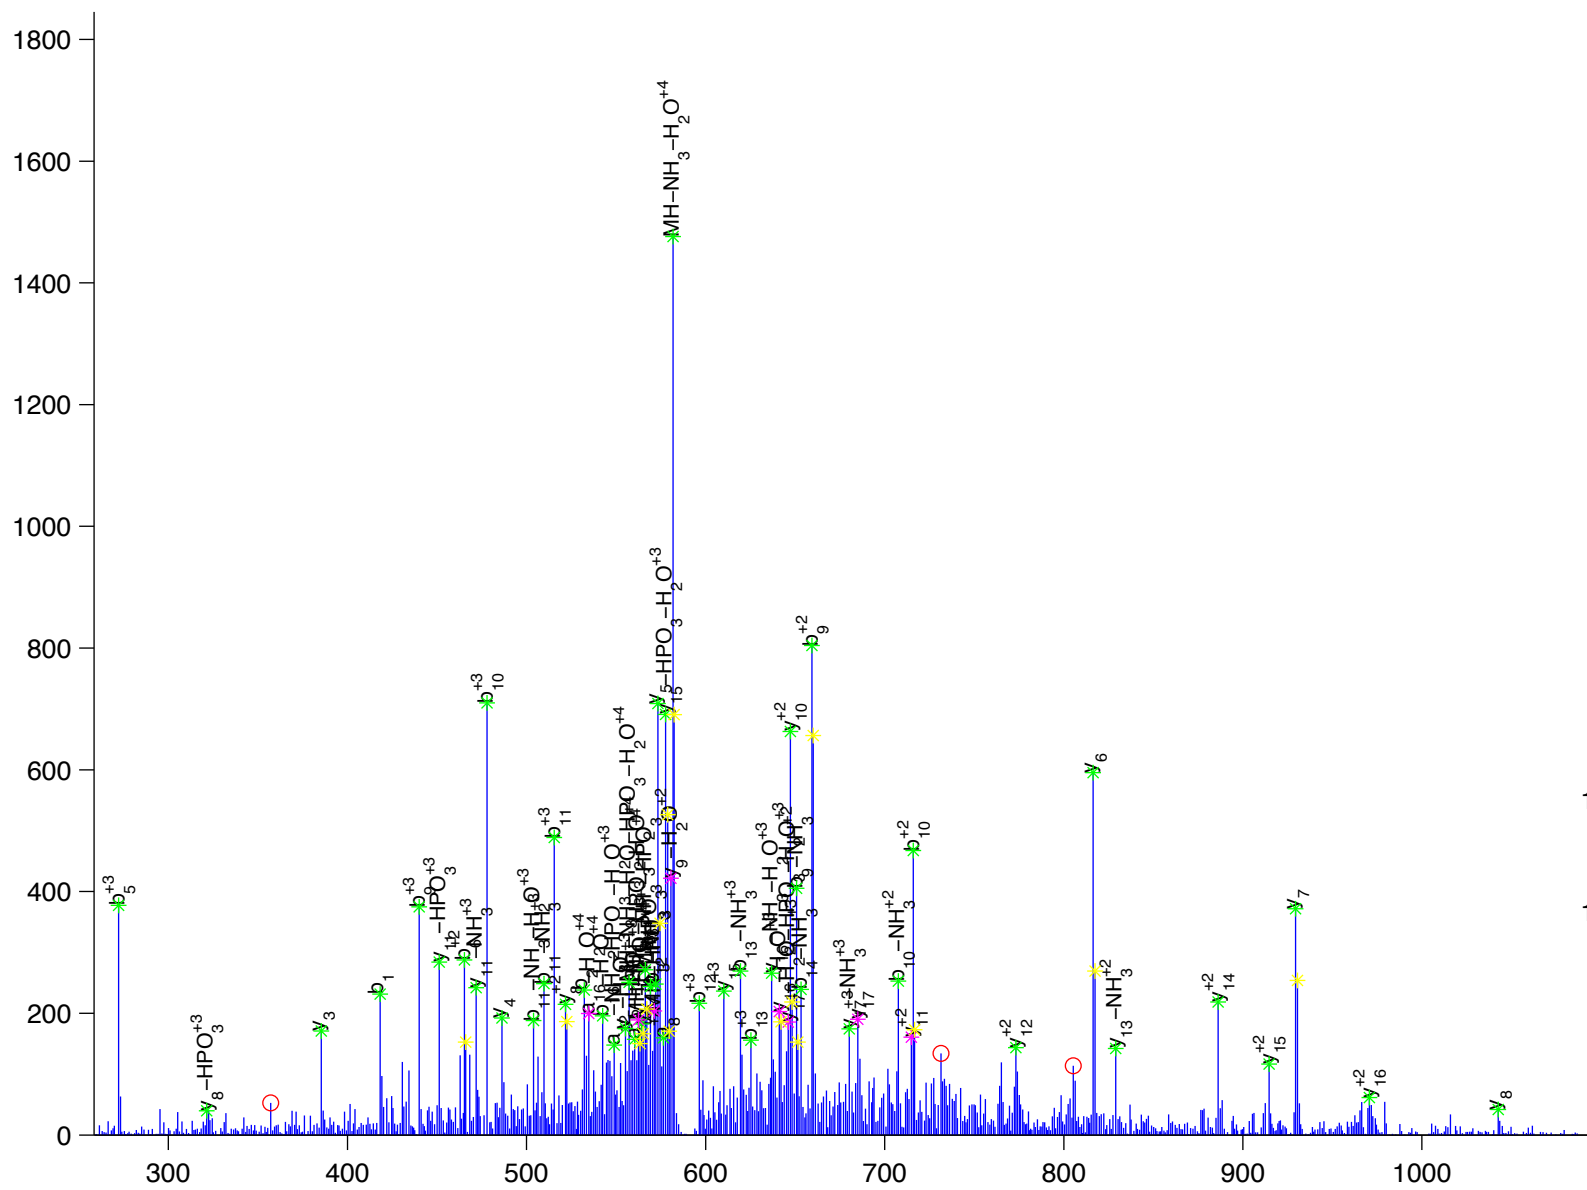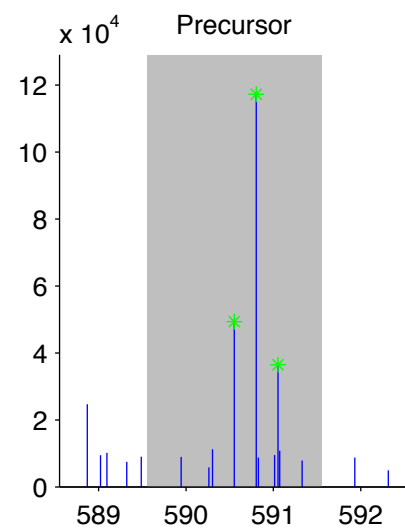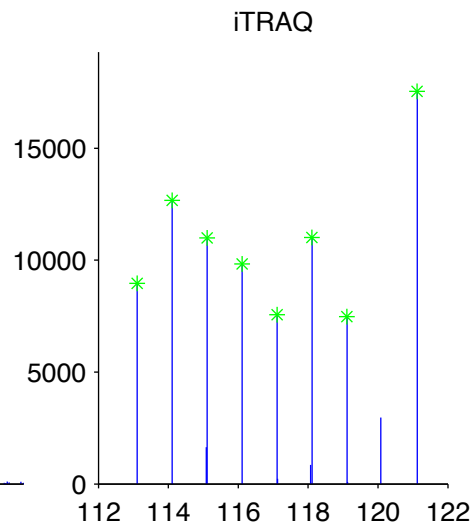

y [ V ] [ D ] [ S ] [ E ] [ G ] [ H ] [ L ] [ y ] [ T ] [ V ] [ P ] [ I ] [ R ]

caveolin, caveolae protein 1

Charge State: +3

Scan Number: 5596

File Name: 091130ptp1blivers\_hfd\_basal2.raw

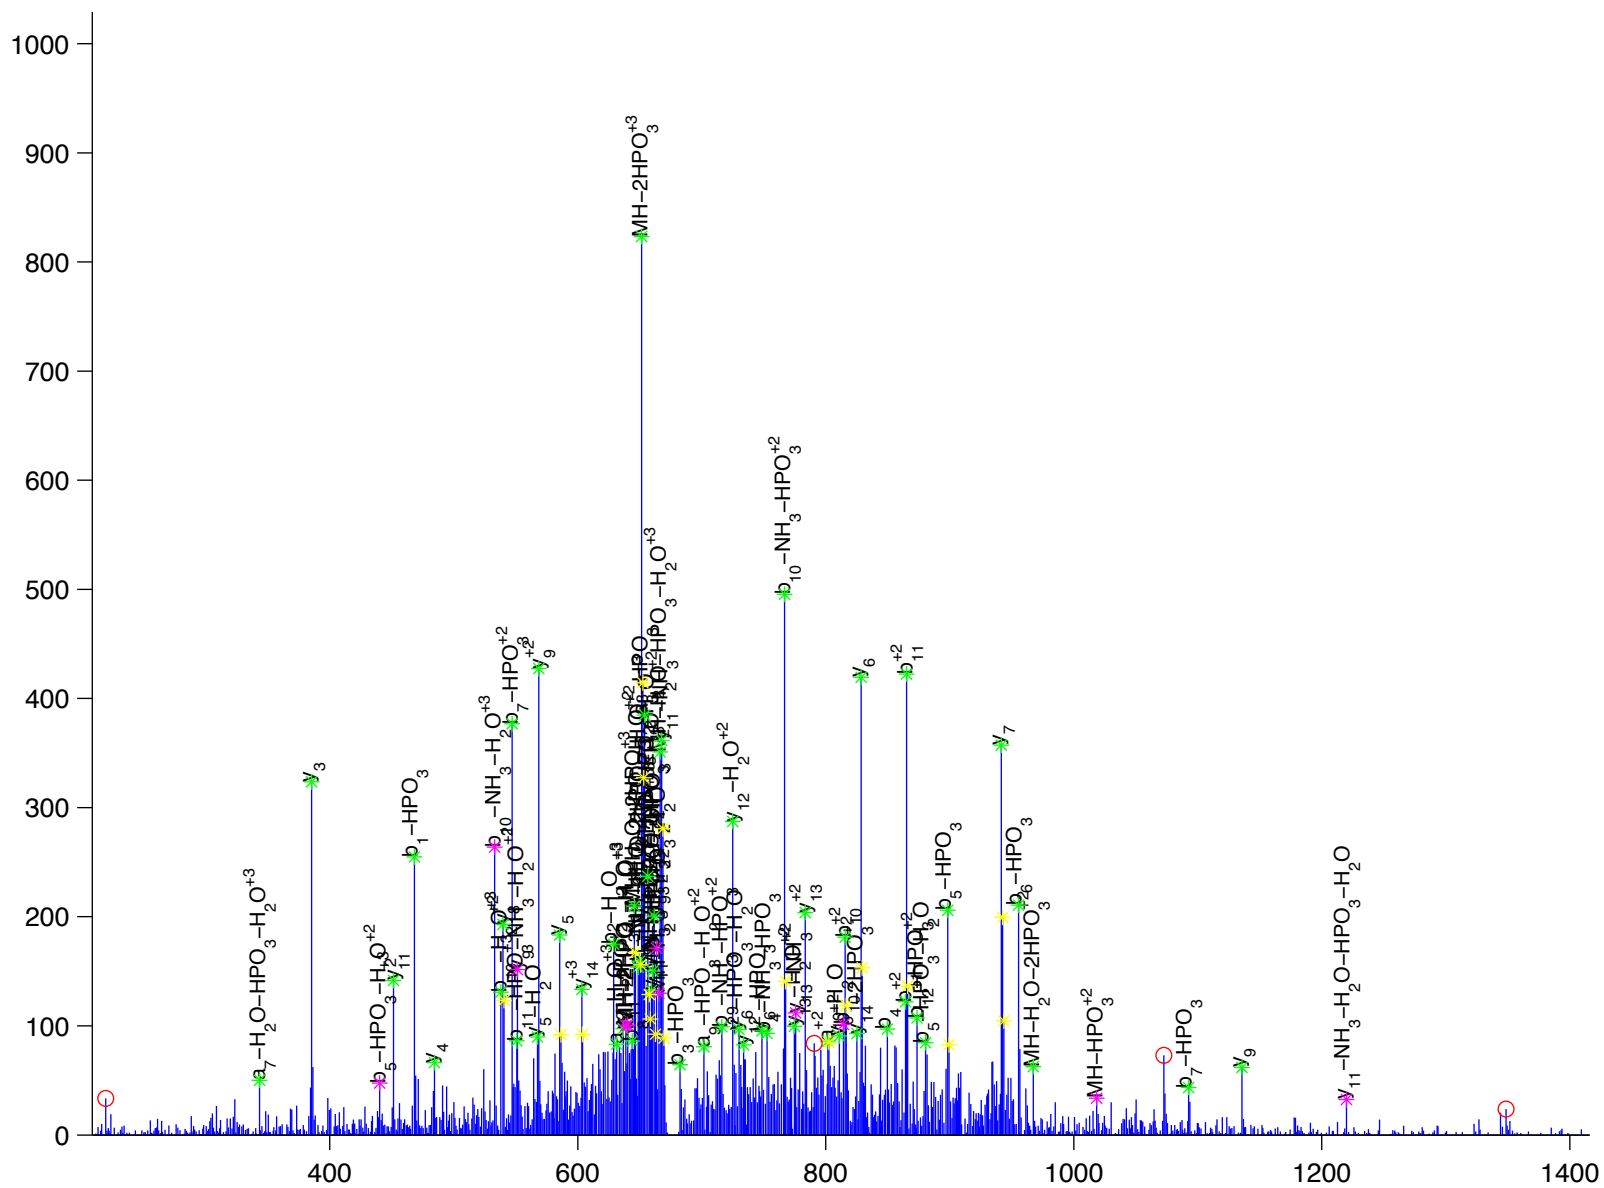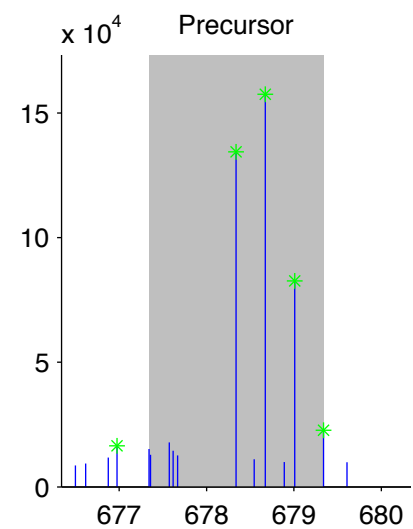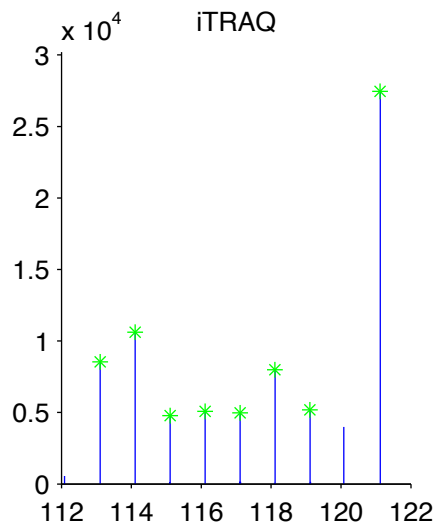

G[S]P[G]A[L]S[S]D[S]E[L]P[E]N[P]y[S]Q[V]K

cingulin

Charge State: +3

Scan Number: 5273

File Name: 091130ptp1blivers\_hfd\_basal2.raw

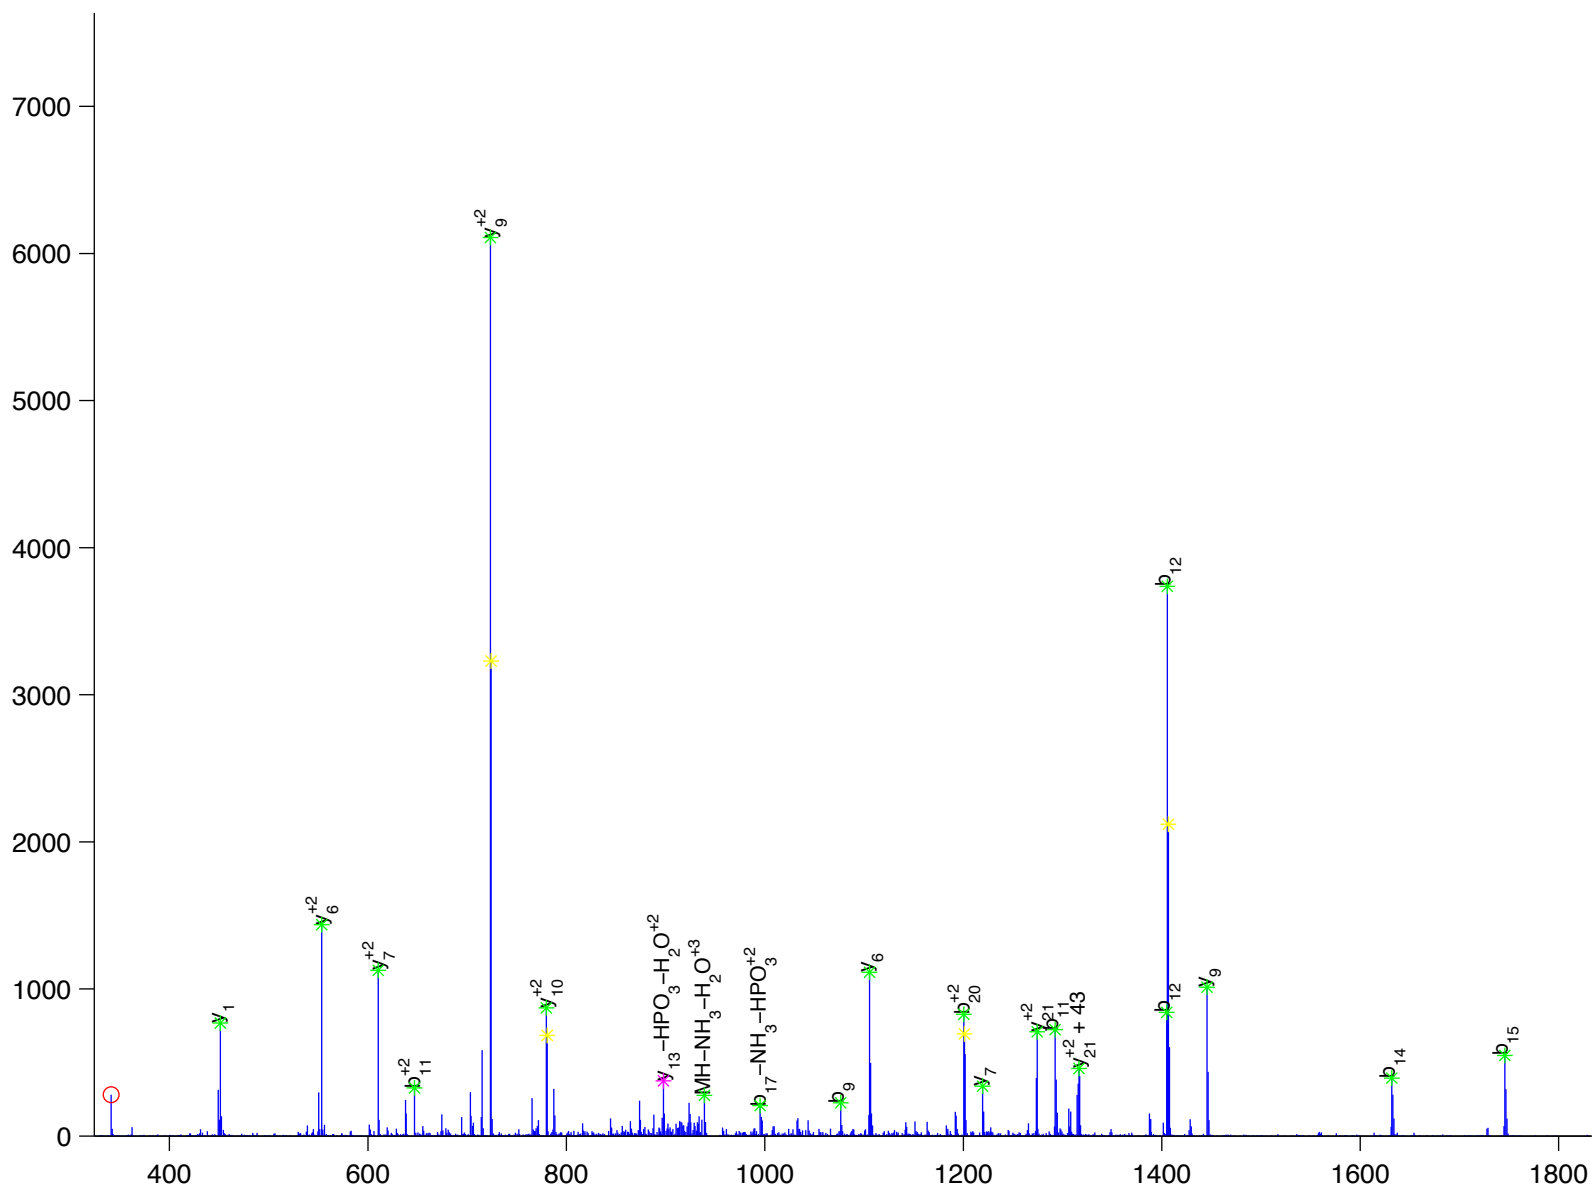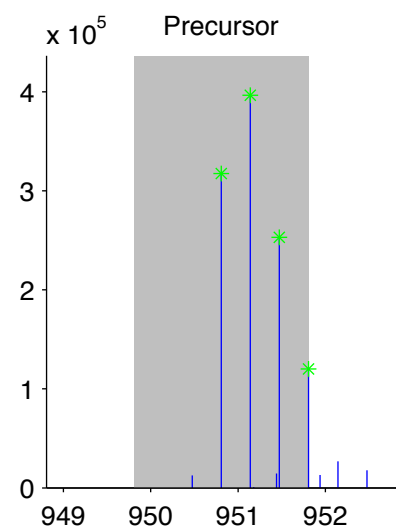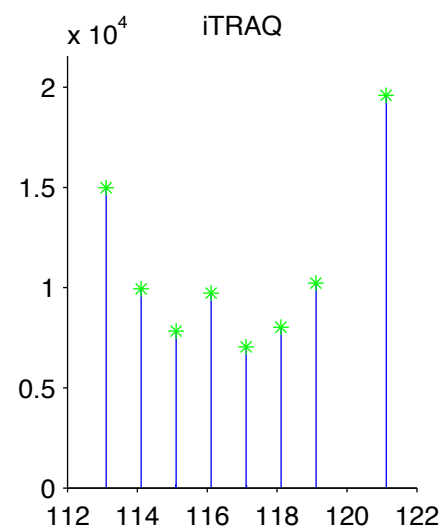

E [ N ] P [ y ] Y [ D ] S [ R ]

clathrin, heavy polypeptide (Hc)

Charge State: +2

Scan Number: 3291

File Name: 0090807ptp1blivers\_M\_HFD2.raw

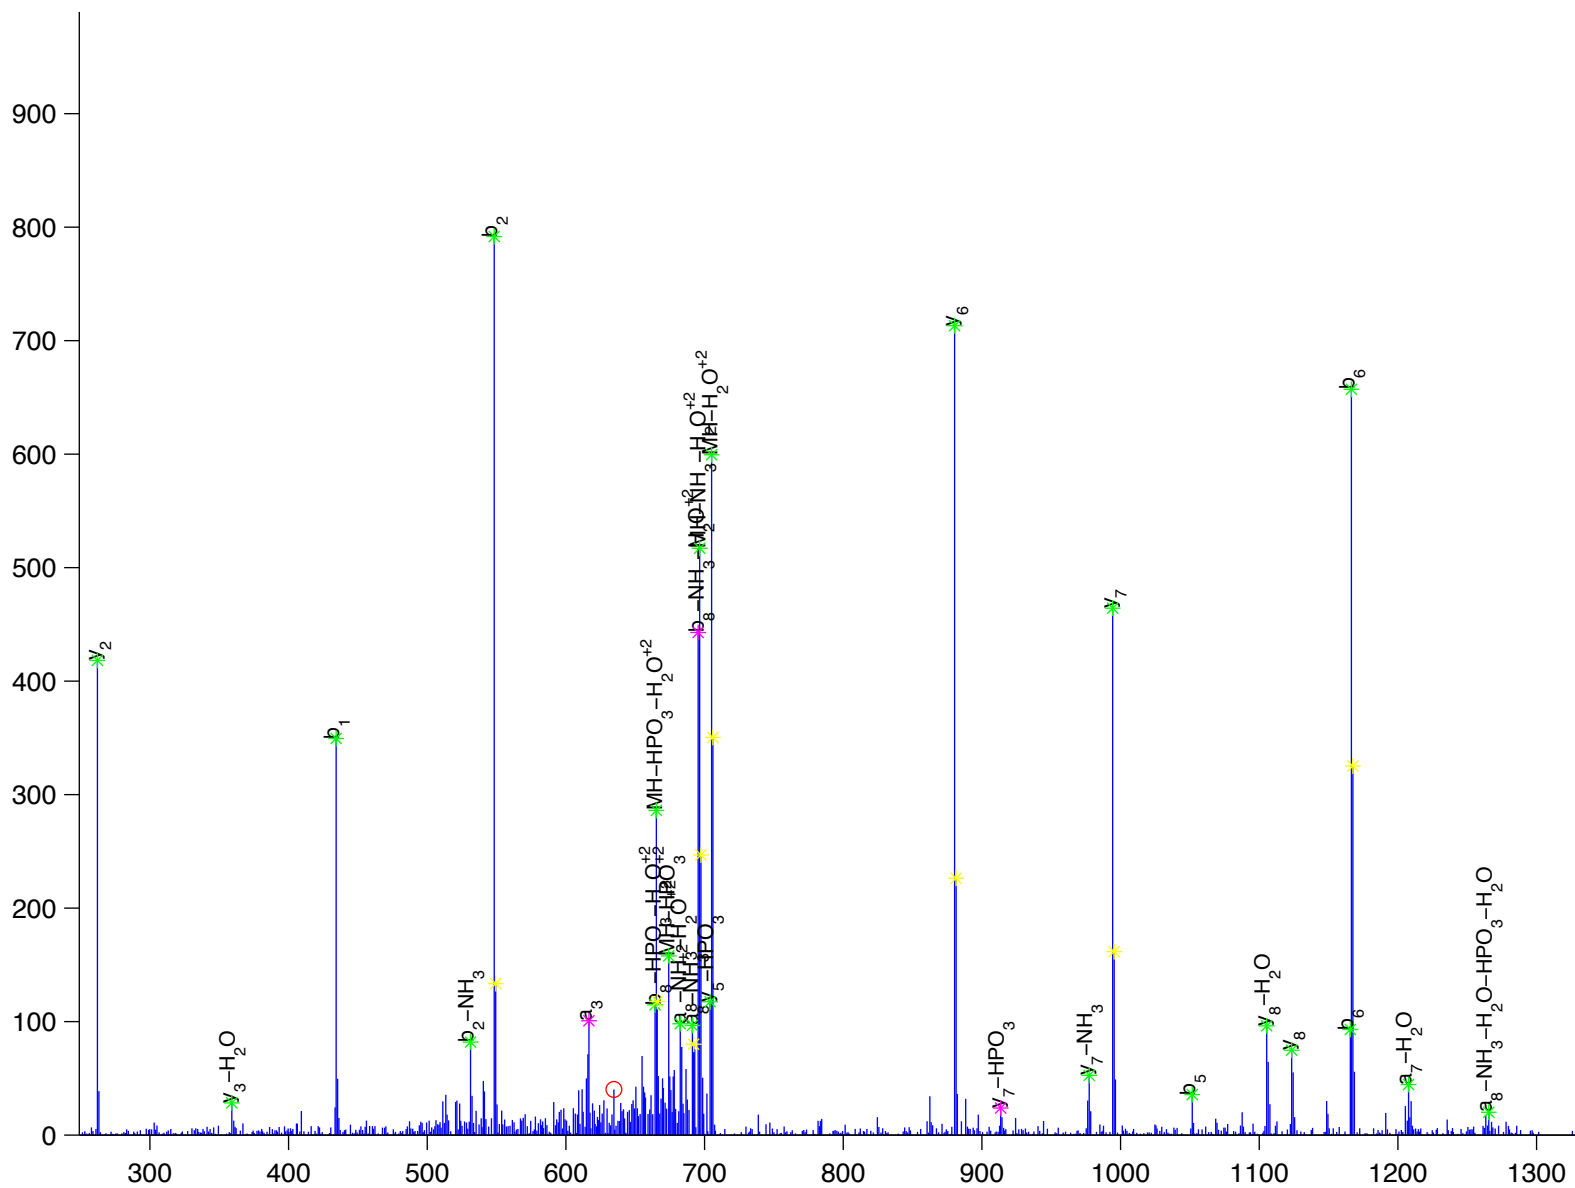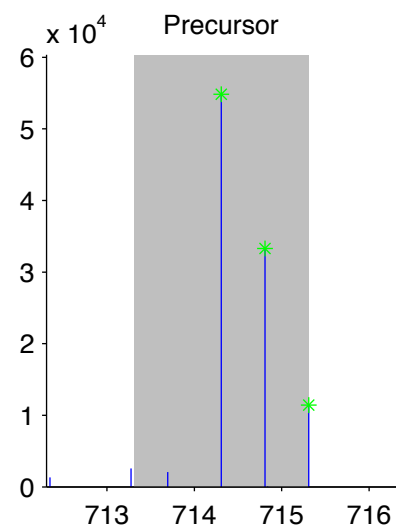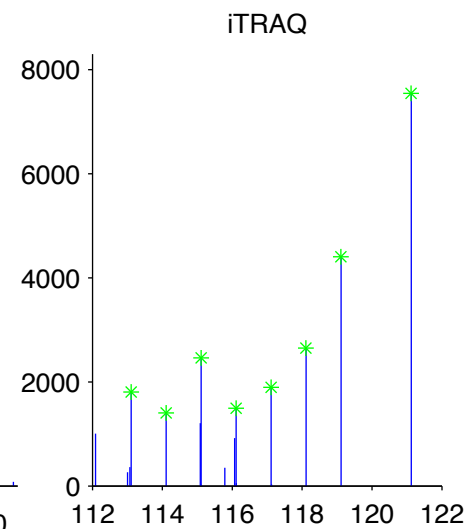

S[V]N[E]S[L]N[N]L[F]I[T]E[E]D[y]Q[A]L[R]

clathrin, heavy polypeptide (Hc)

Charge State: +3

Scan Number: 6423

File Name: 100905ptp1blivers\_ncHFD\_basal.raw

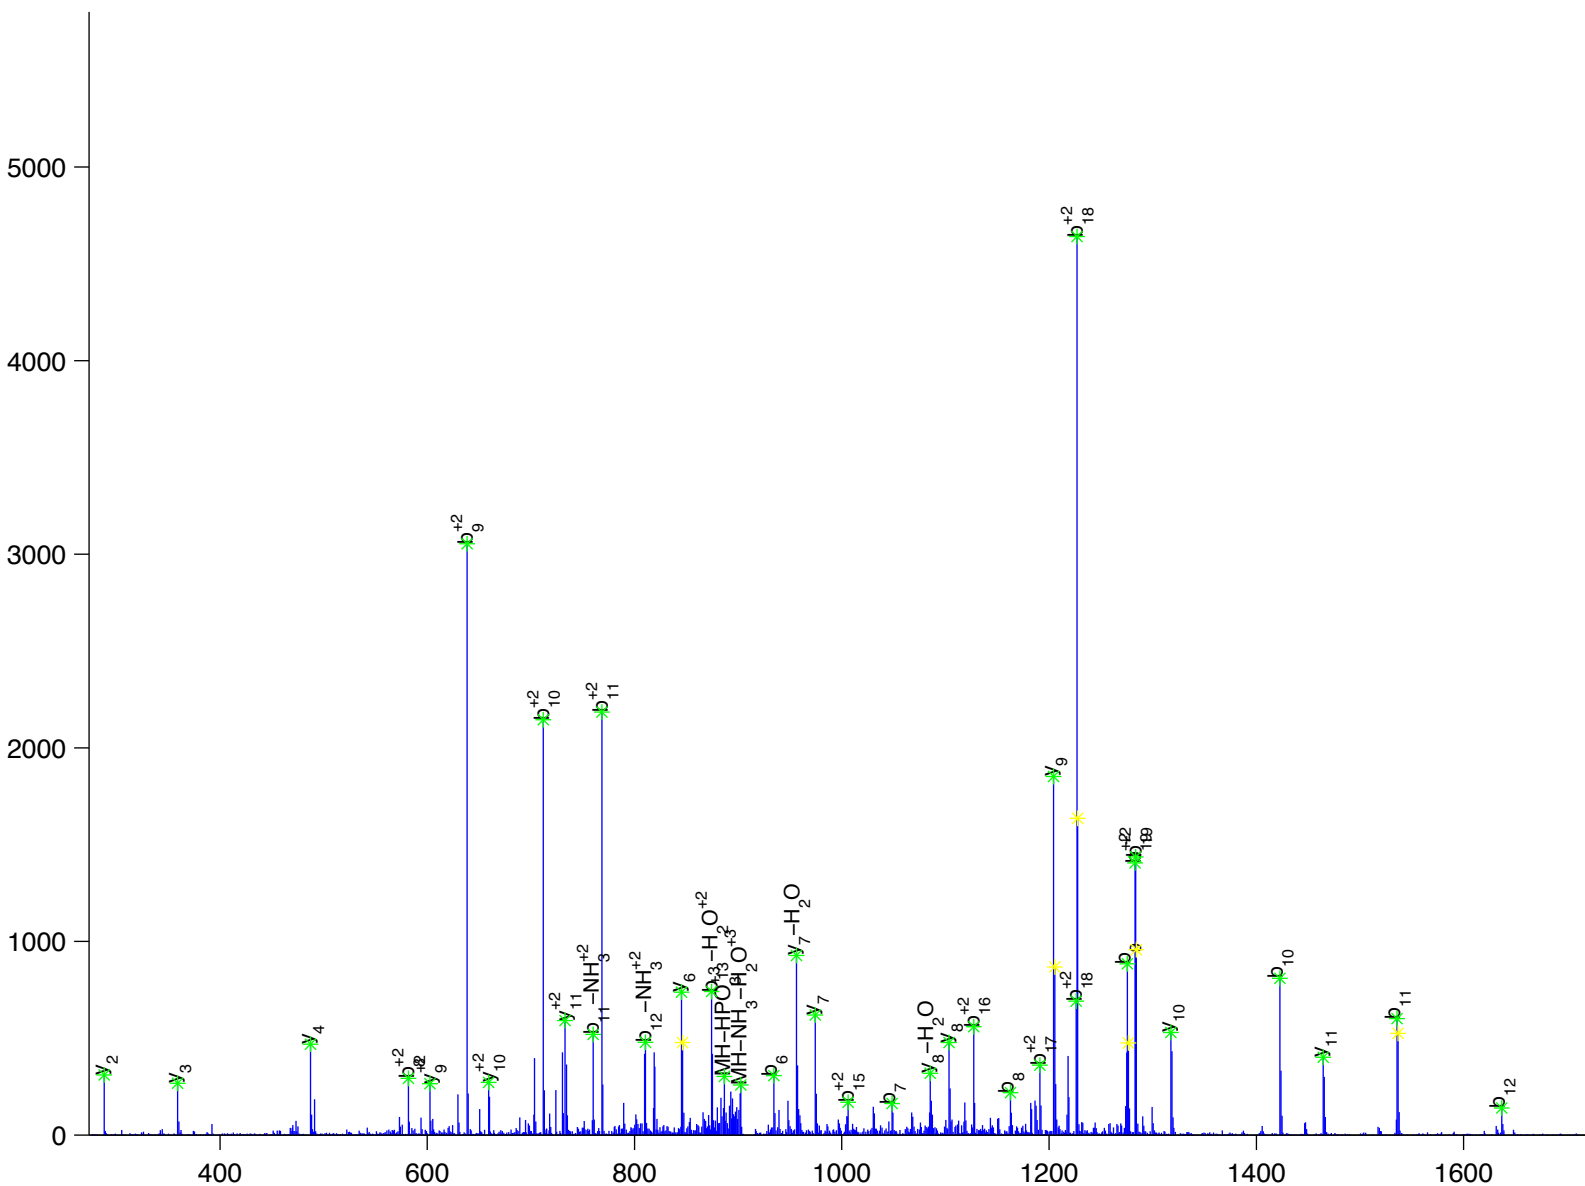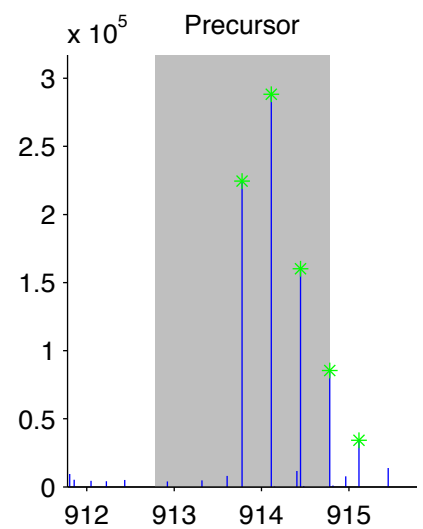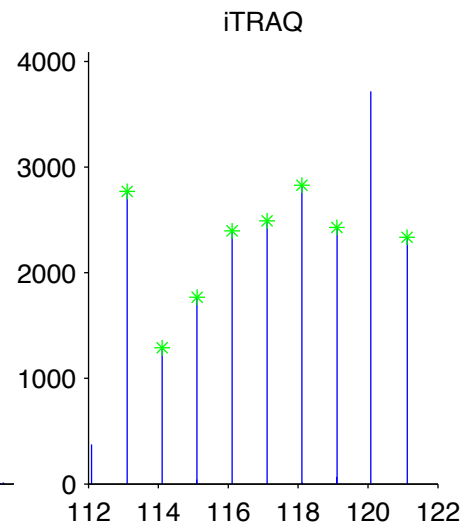



T [ S ] I [ D ] A [ y ] D [ N ] F [ D ] N [ I ] S [ L ] A [ Q ] R

clathrin, heavy polypeptide (Hc)

Charge State: +3

Scan Number: 7989

File Name: 0090807ptp1blivers\_M\_HFD2.raw

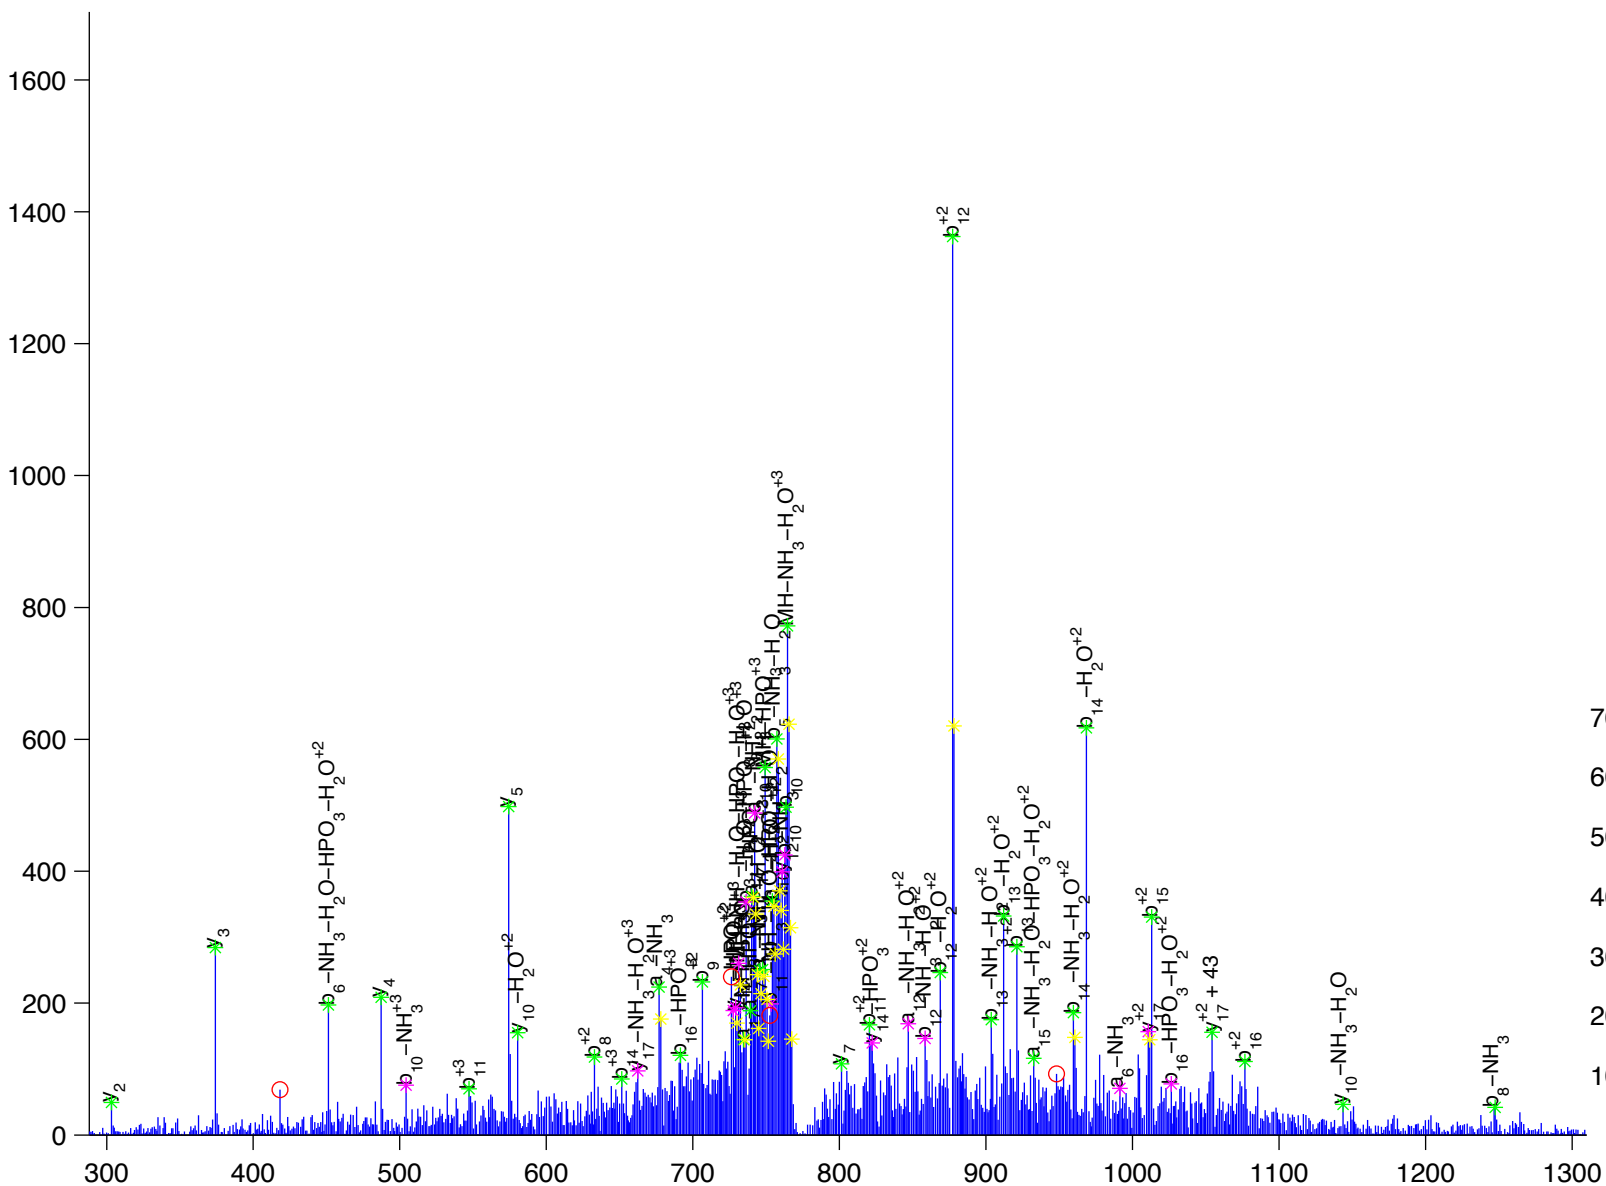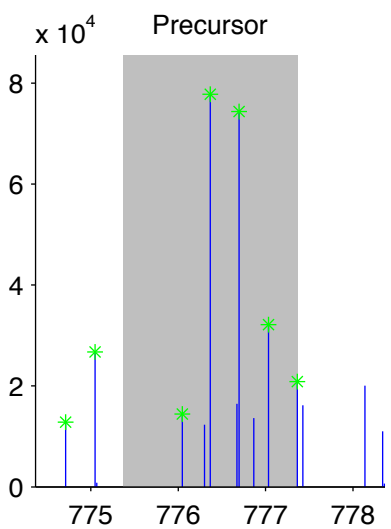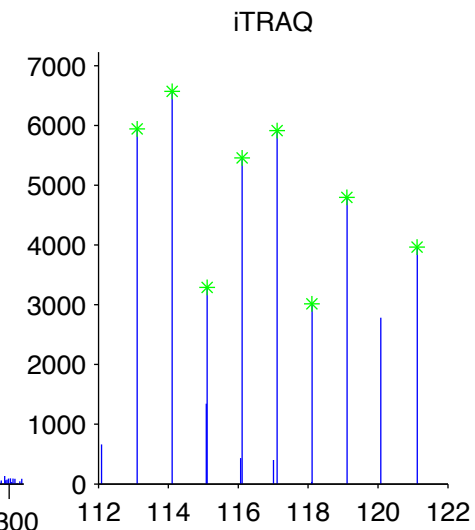

T [ N ] y [ Y ] D [ G ] Y [ Q ] A [ Q ] P [ L ] A [ T ] R

claudin 2  
 Charge State: +3  
 Scan Number: 4449  
 File Name: 090806ptp1blivers\_M\_NC2.raw

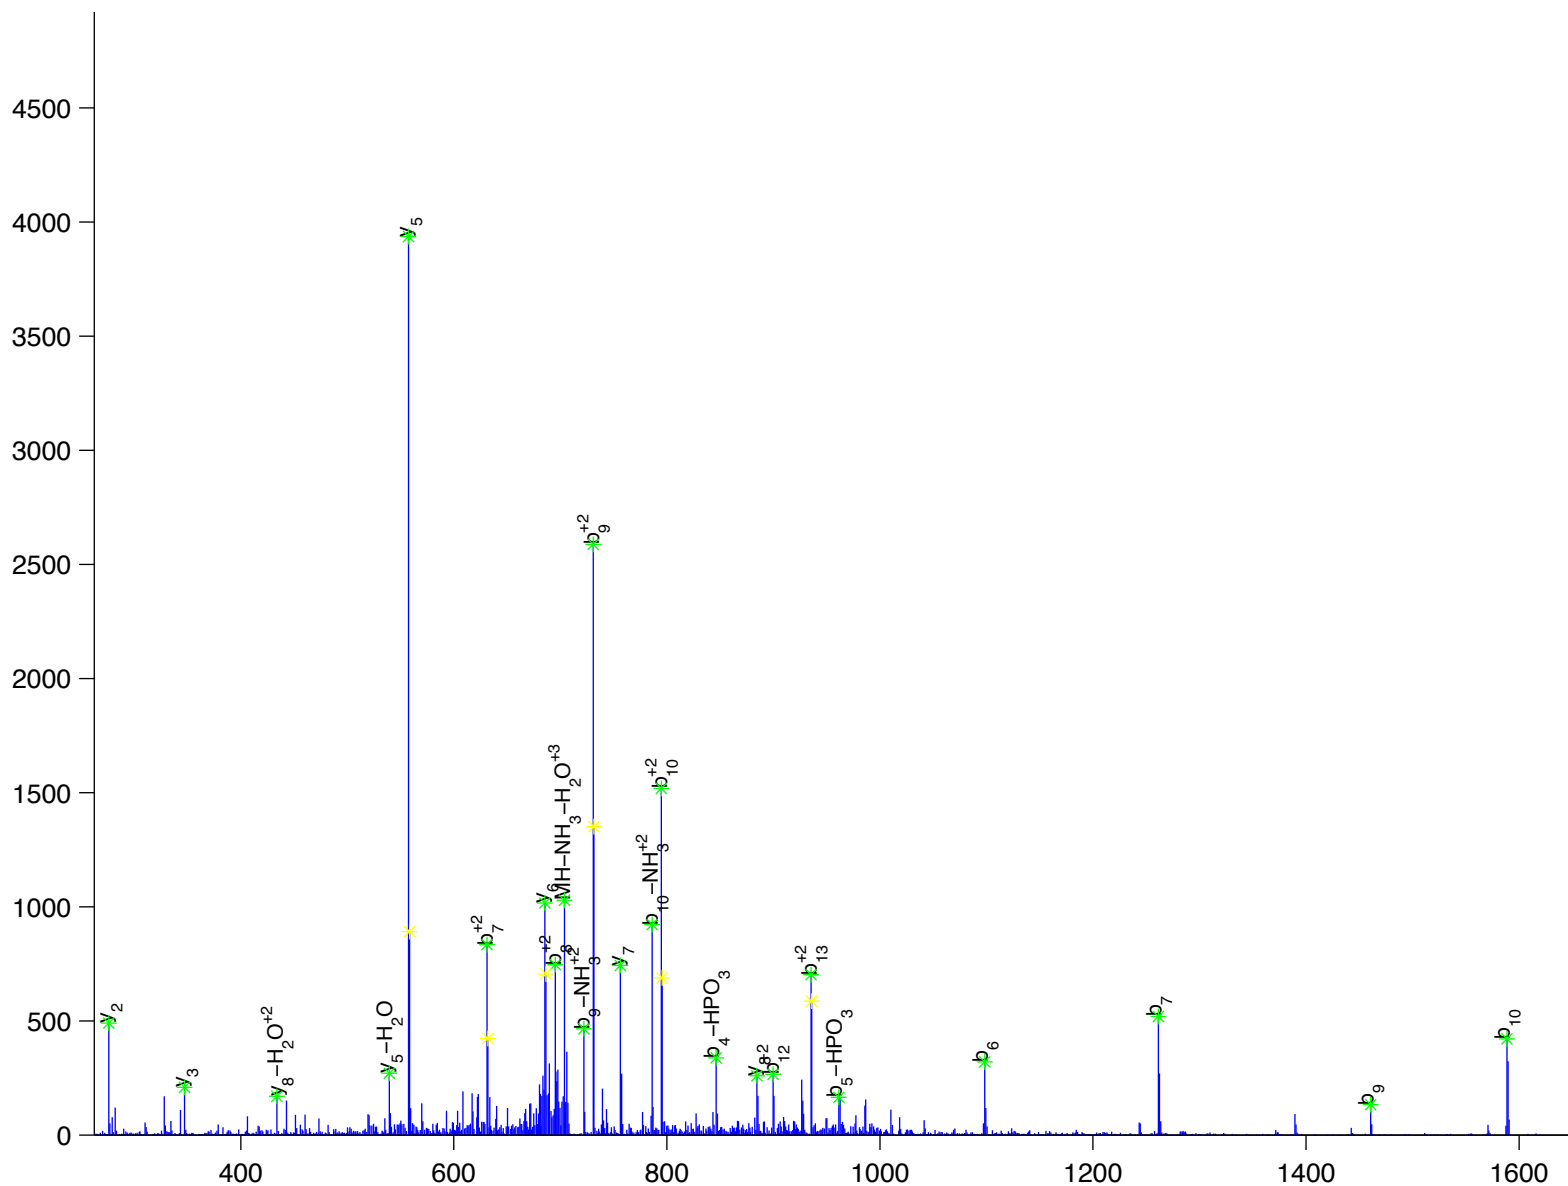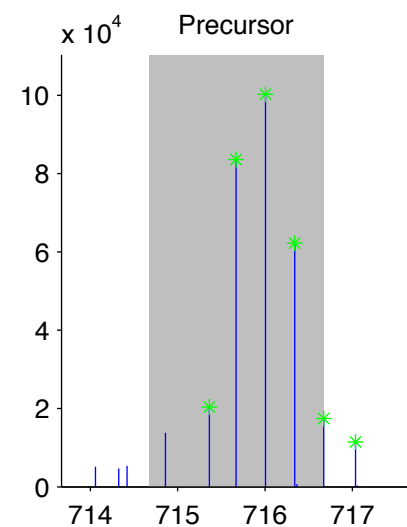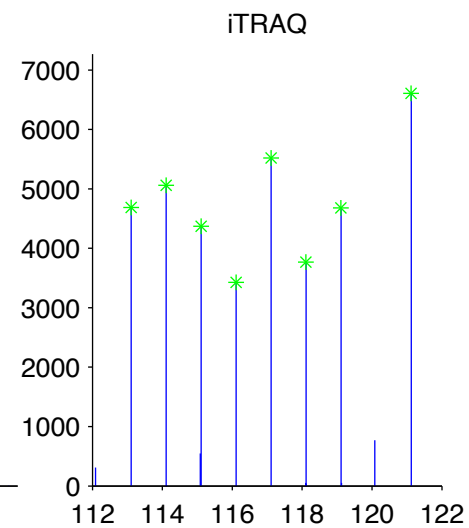

T [ N ] Y [ y ] D [ G ] Y [ Q ] A [ Q ] P [ L ] A [ T ] R

claudin 2  
 Charge State: +3  
 Scan Number: 4449  
 File Name: 090806ptp1blivers\_M\_NC2.raw

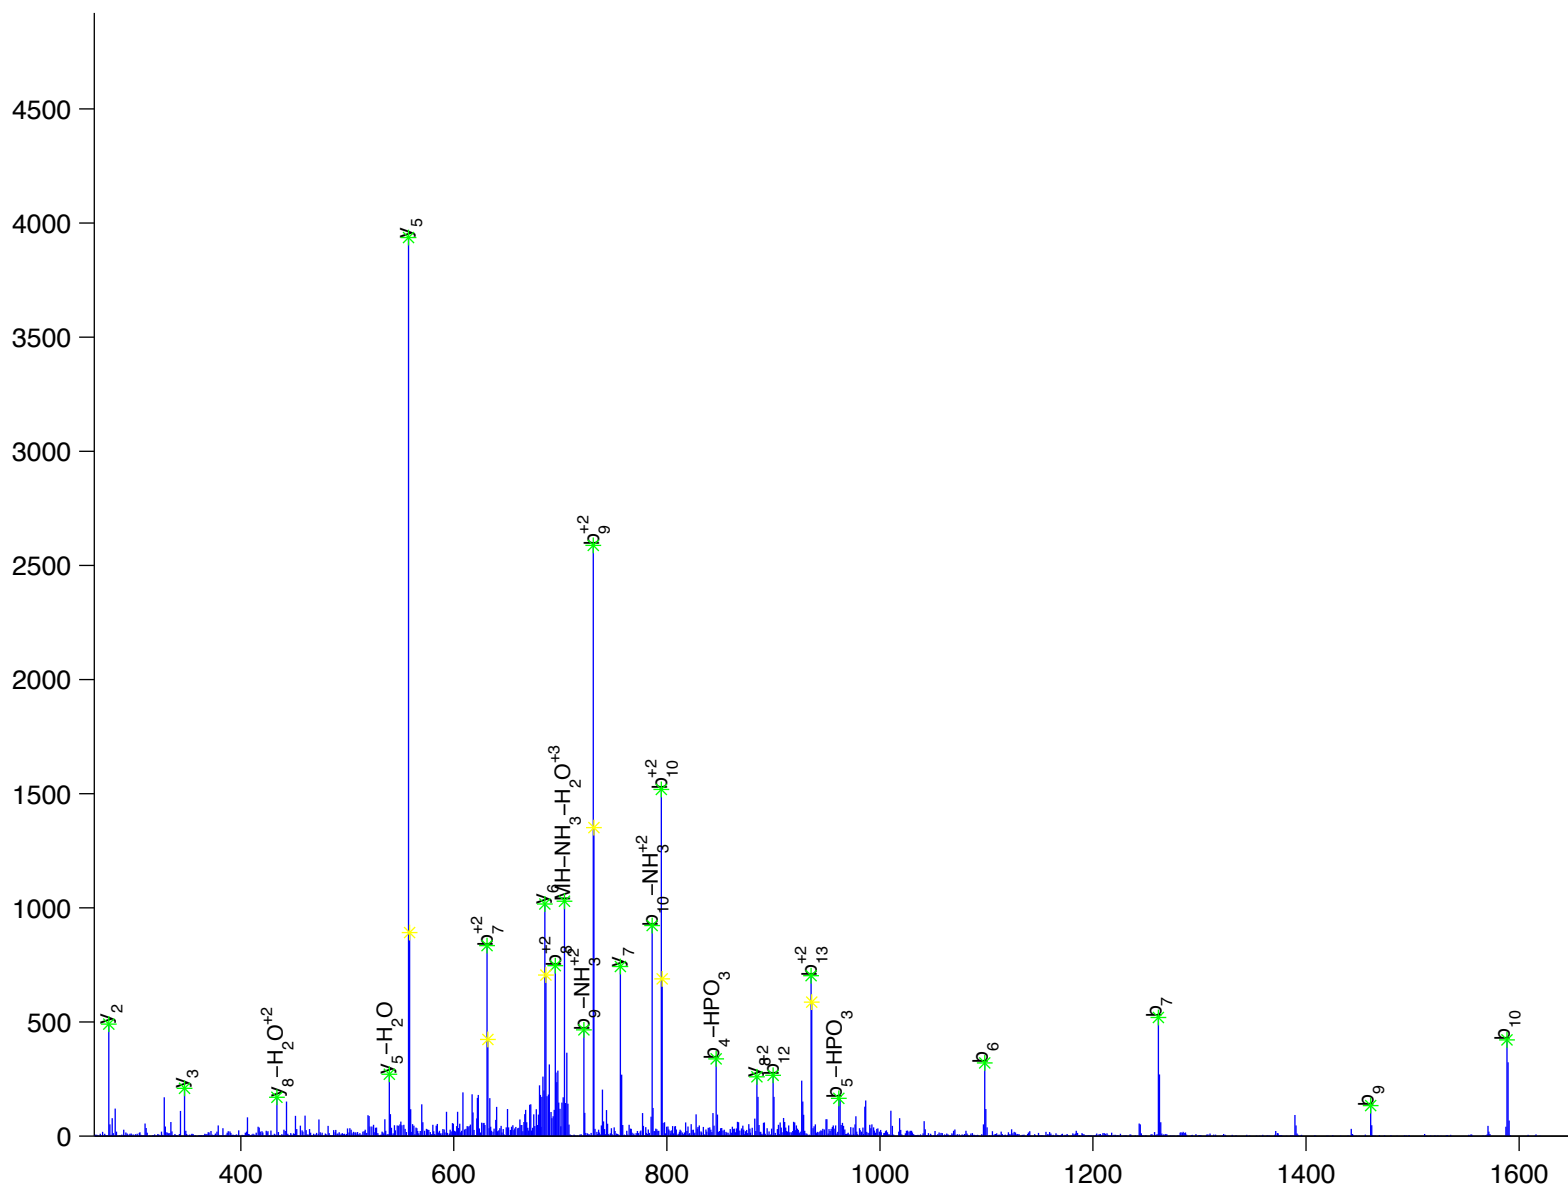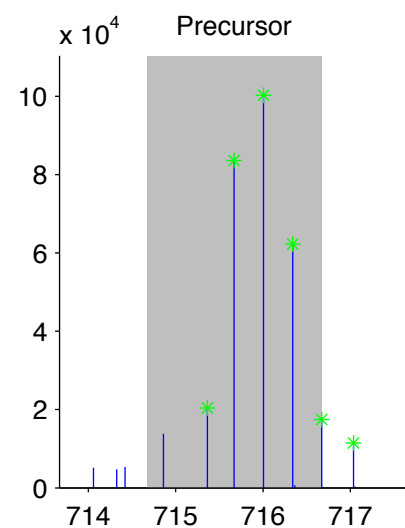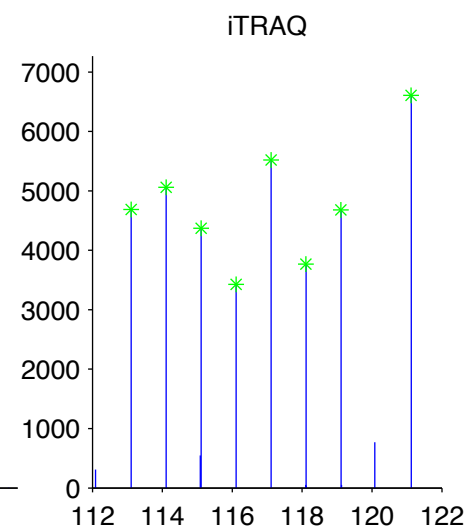

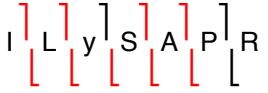

claudin 3  
 Charge State: +2  
 Scan Number: 4284  
 File Name: 090728ptp1blivers\_M\_NC\_ins\_e.raw

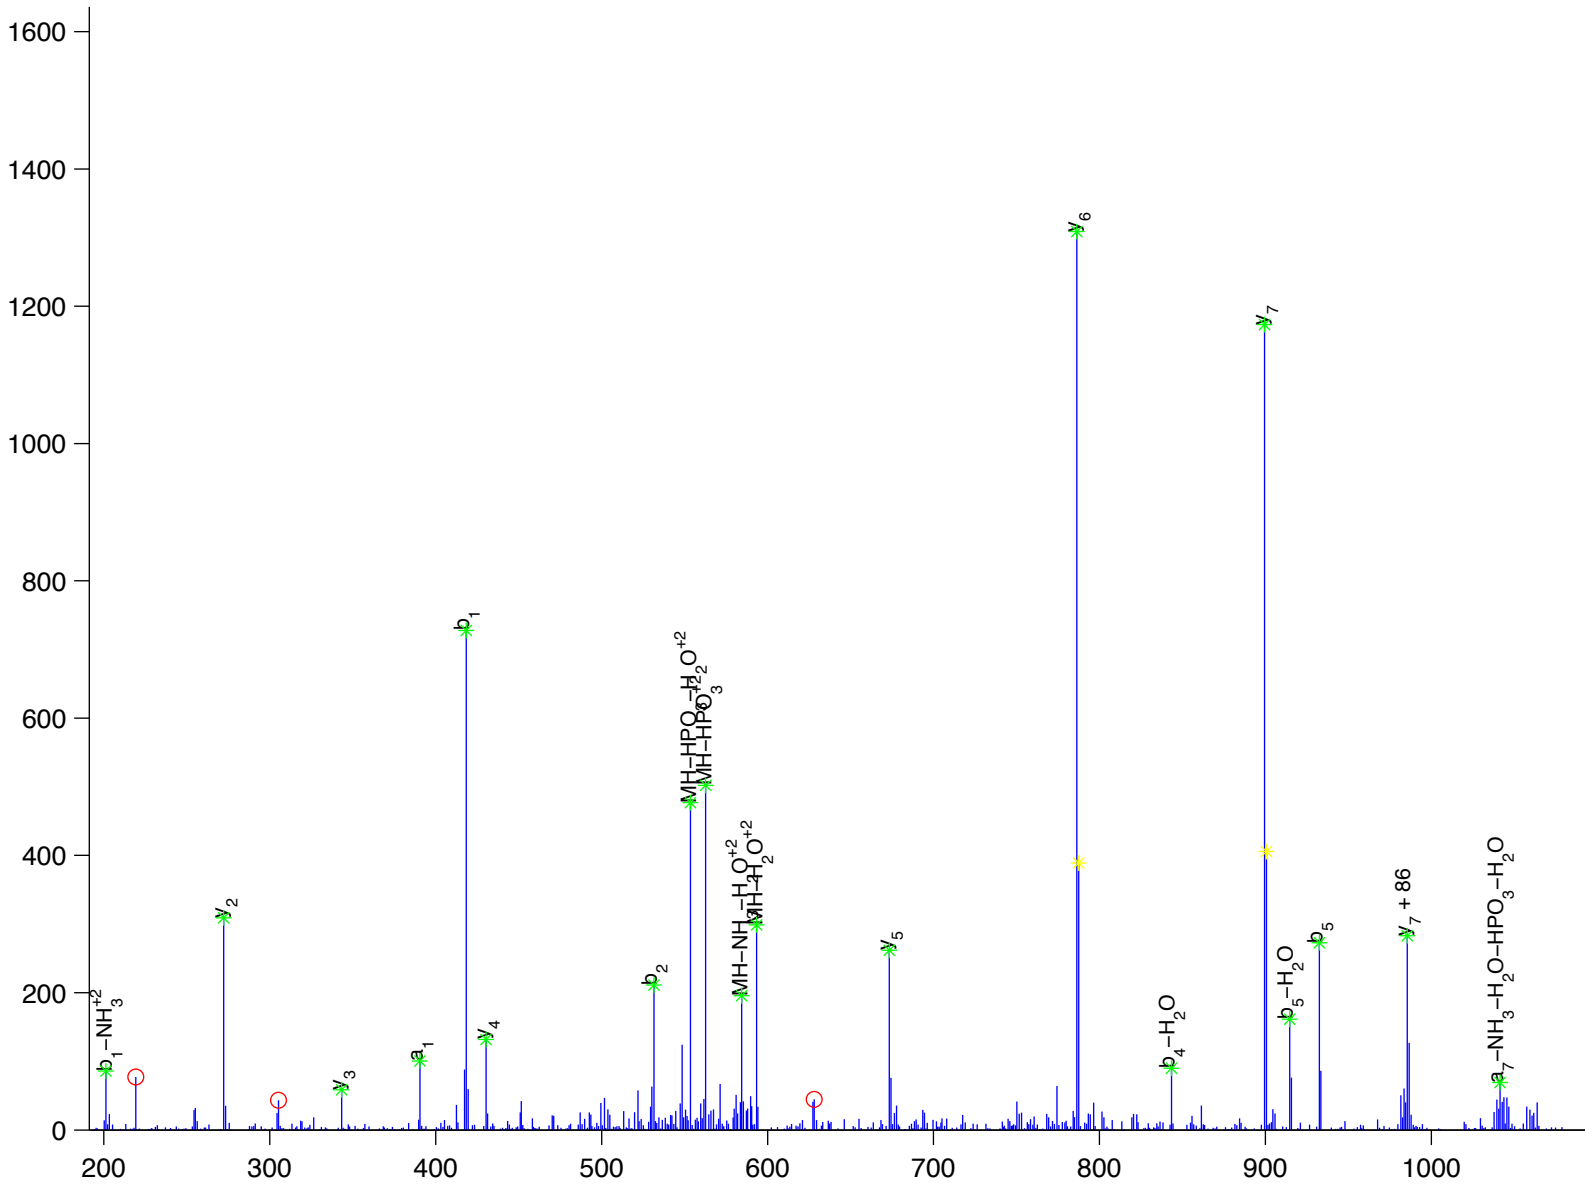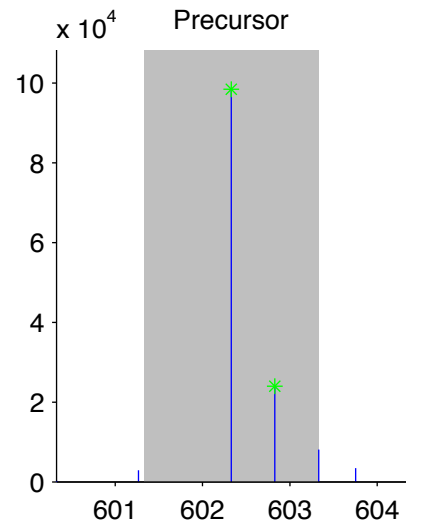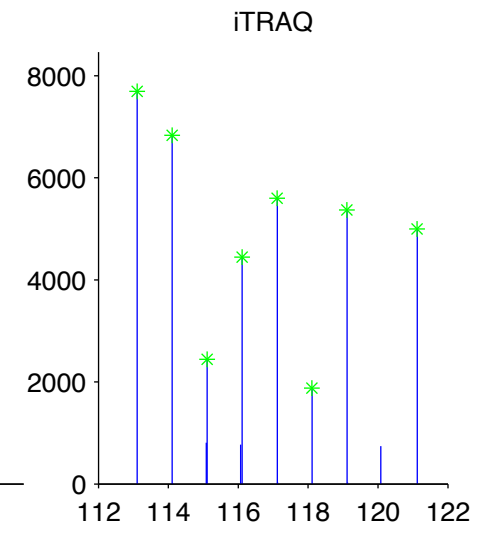

I [G] [E] [G] [T] y [G] [V] [V] [Y] K

cyclin-dependent kinase 2 isoform 2

Charge State: +3

Scan Number: 5525

File Name: 091130ptp1blivers\_hfd\_basal2.raw

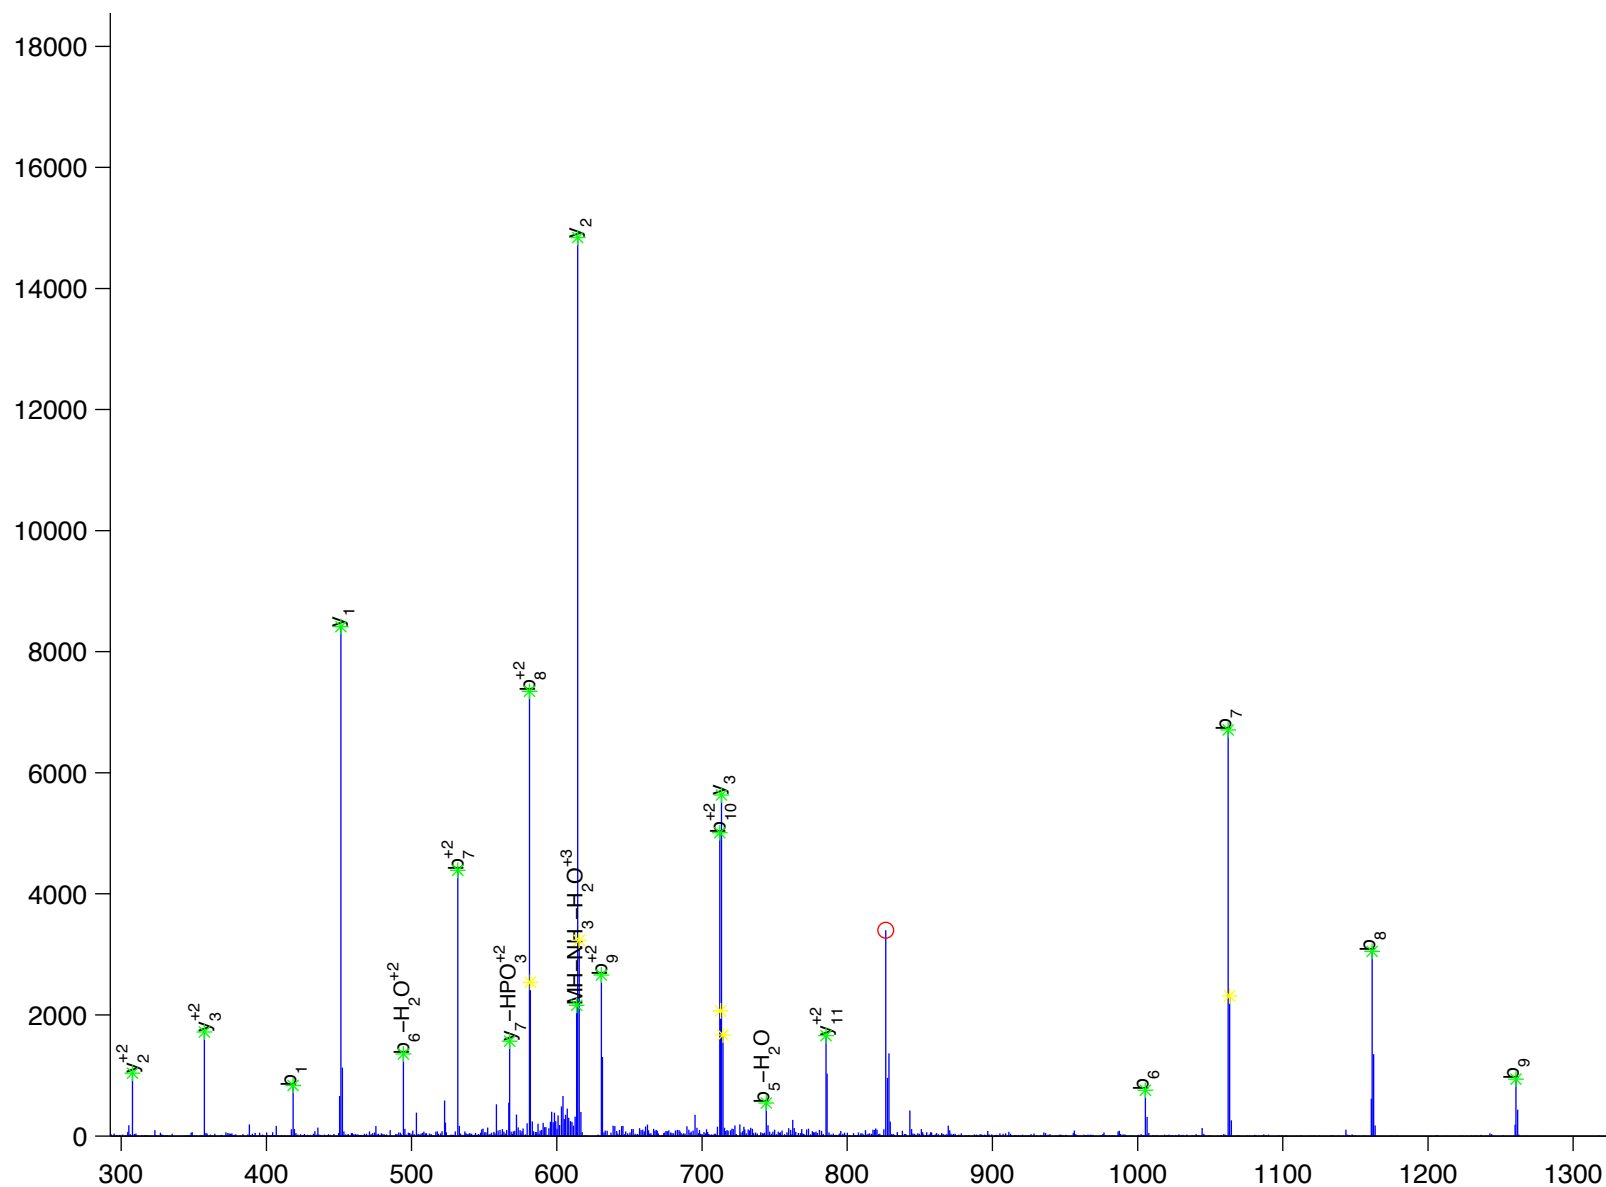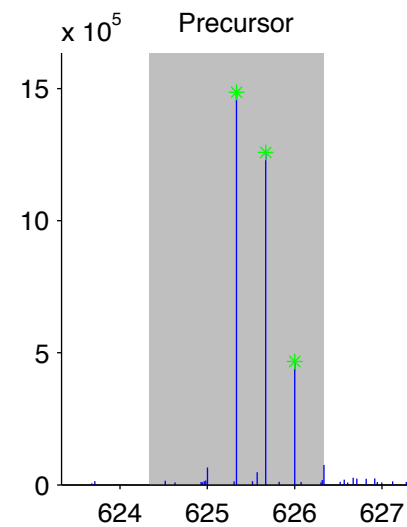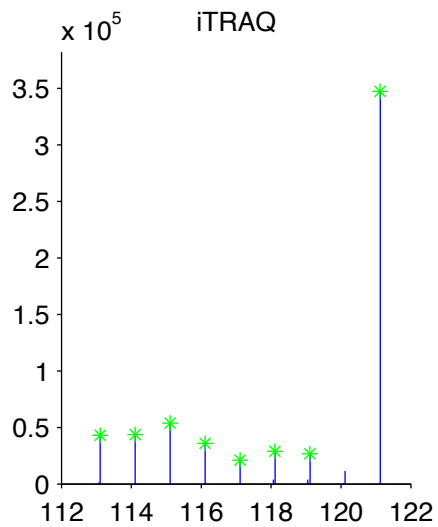

N L S E G N N A N Y T E y V A T R

cyclin-dependent kinase-like 5

Charge State: +3

Scan Number: 4280

File Name: 090806ptp1blivers\_M\_NC2.raw

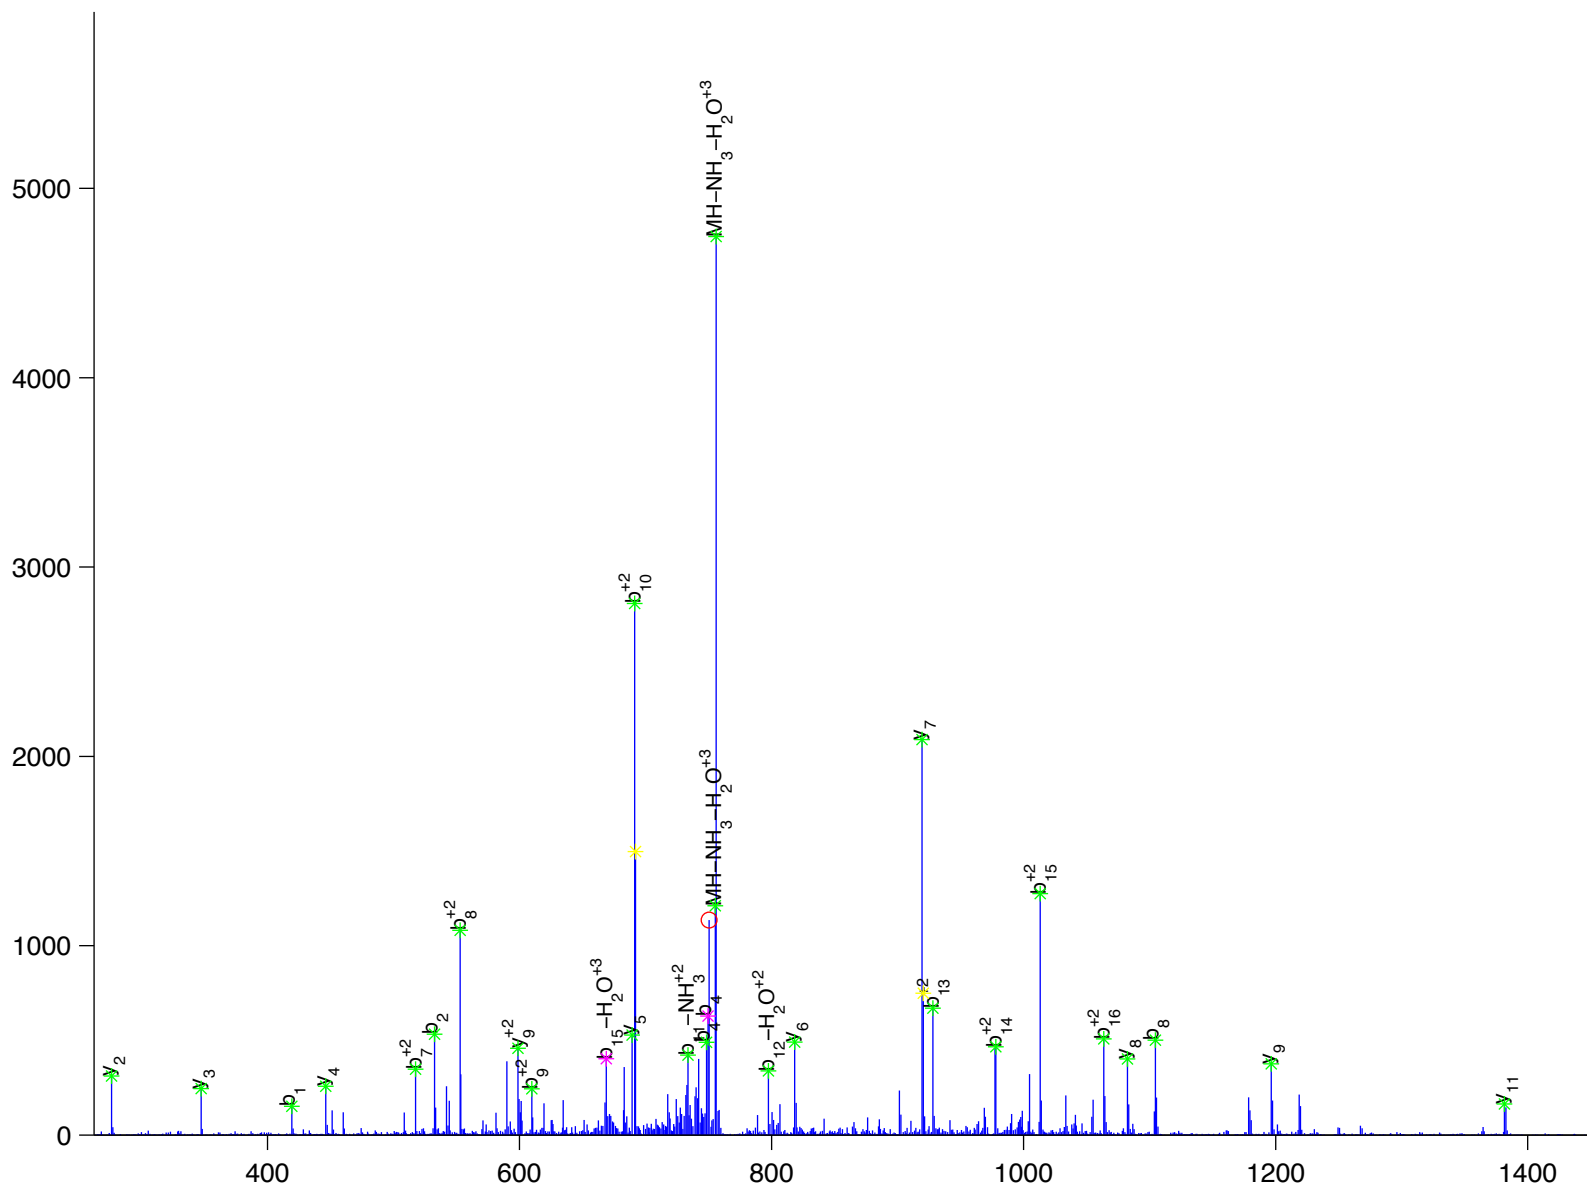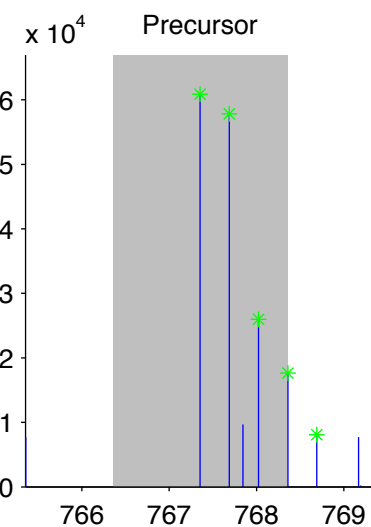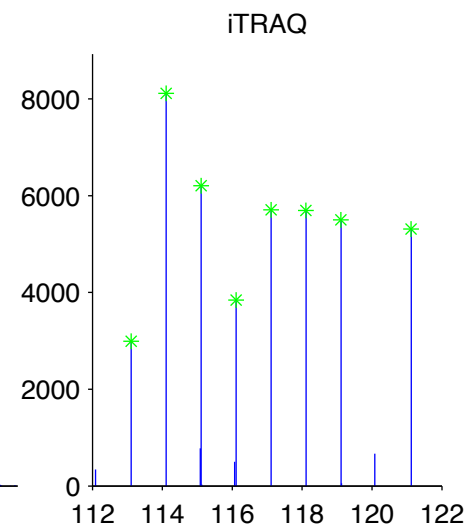

Q [ D ] F [ P ] G [ Q ] S [ S ] G [ F ] E [ y ] S [ R ]

cystathionase

Charge State: +

Scan Number: 4669

File Name: 100611ptp1blivers\_nc\_basal.raw

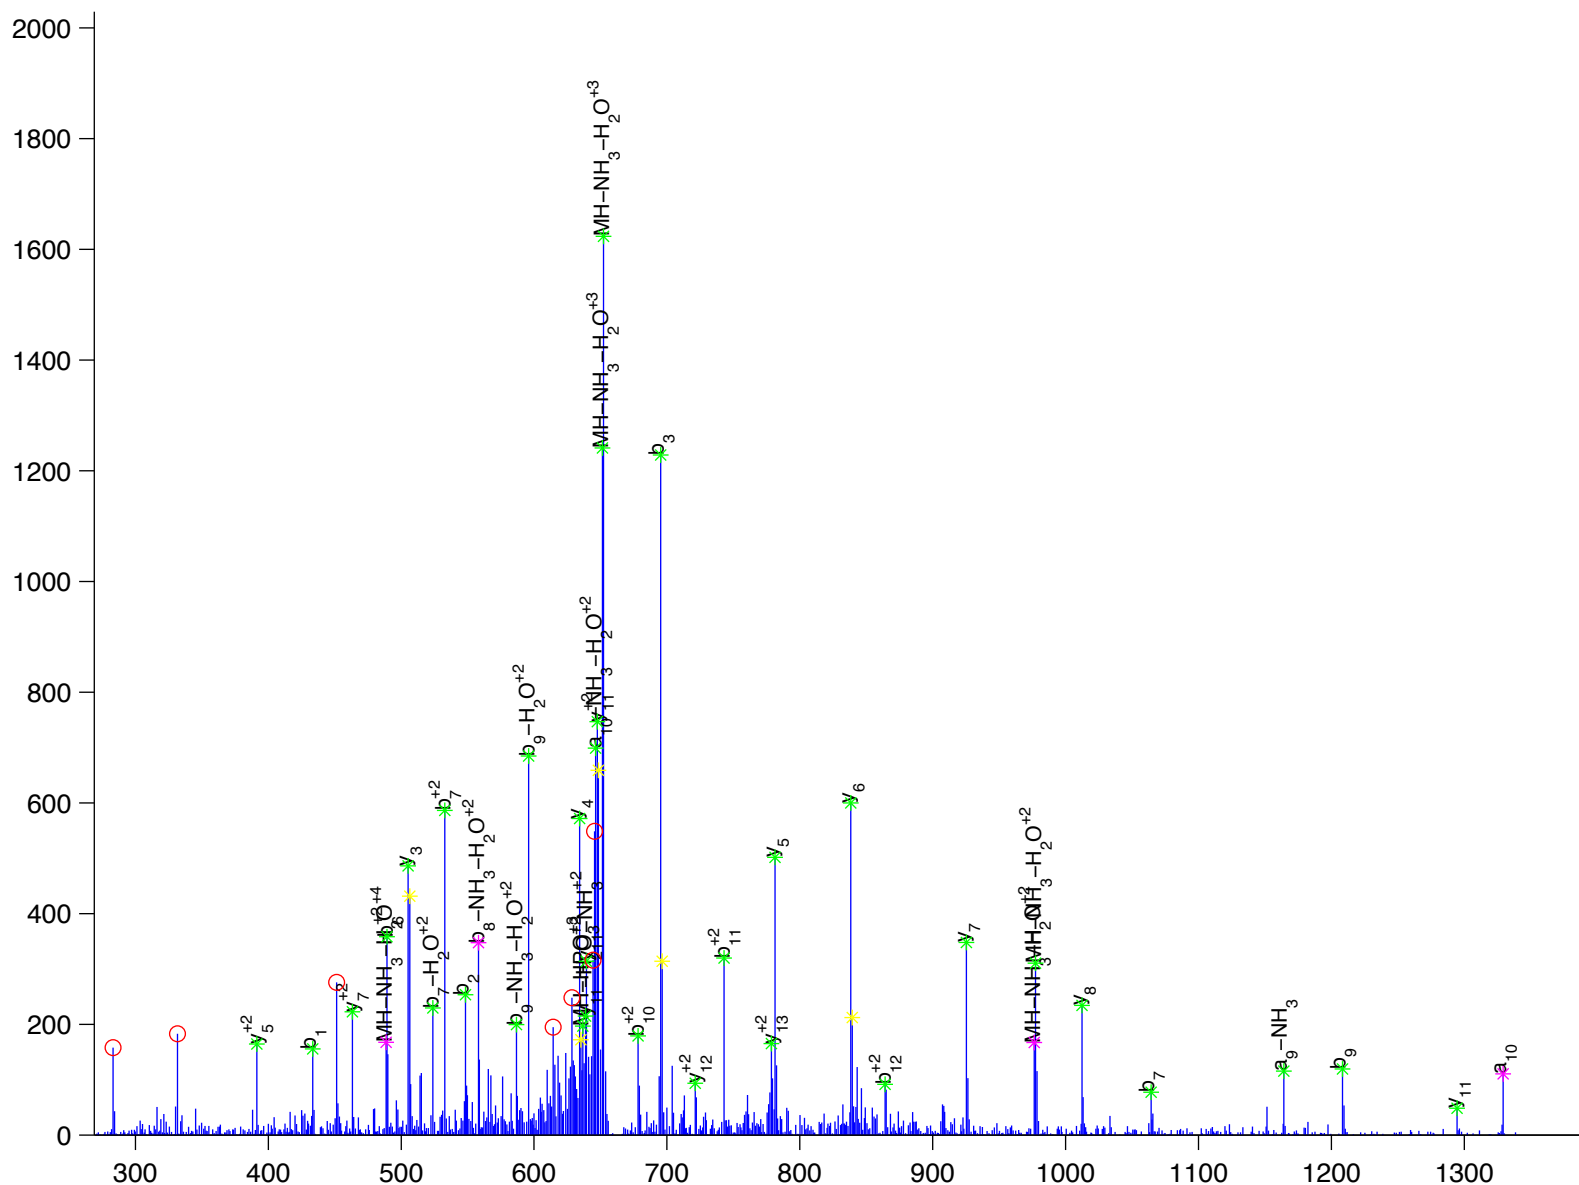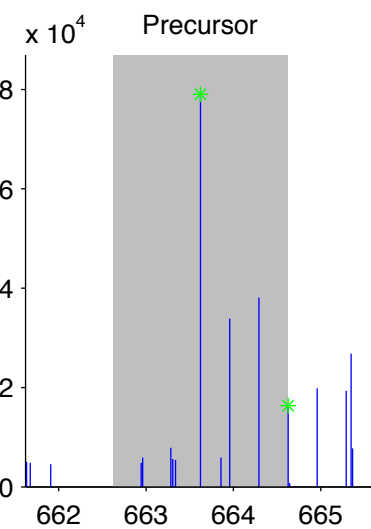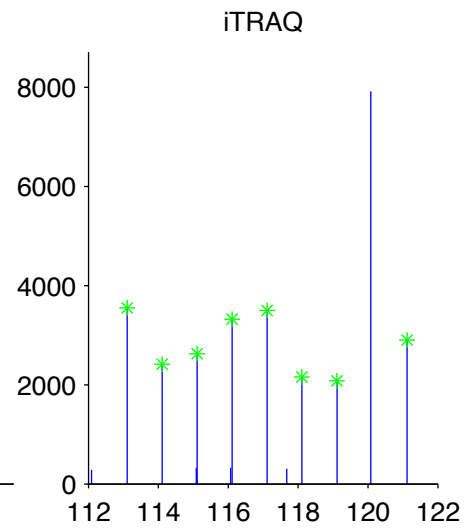

A [G] [D] [E] [I] [I] [C] [M] [D] [E] [V] y [G] [G] [T] [N] R

cystathionase

Charge State: +3

Scan Number: 5064

File Name: 100905ptp1blivers\_ncHFD\_basal.raw

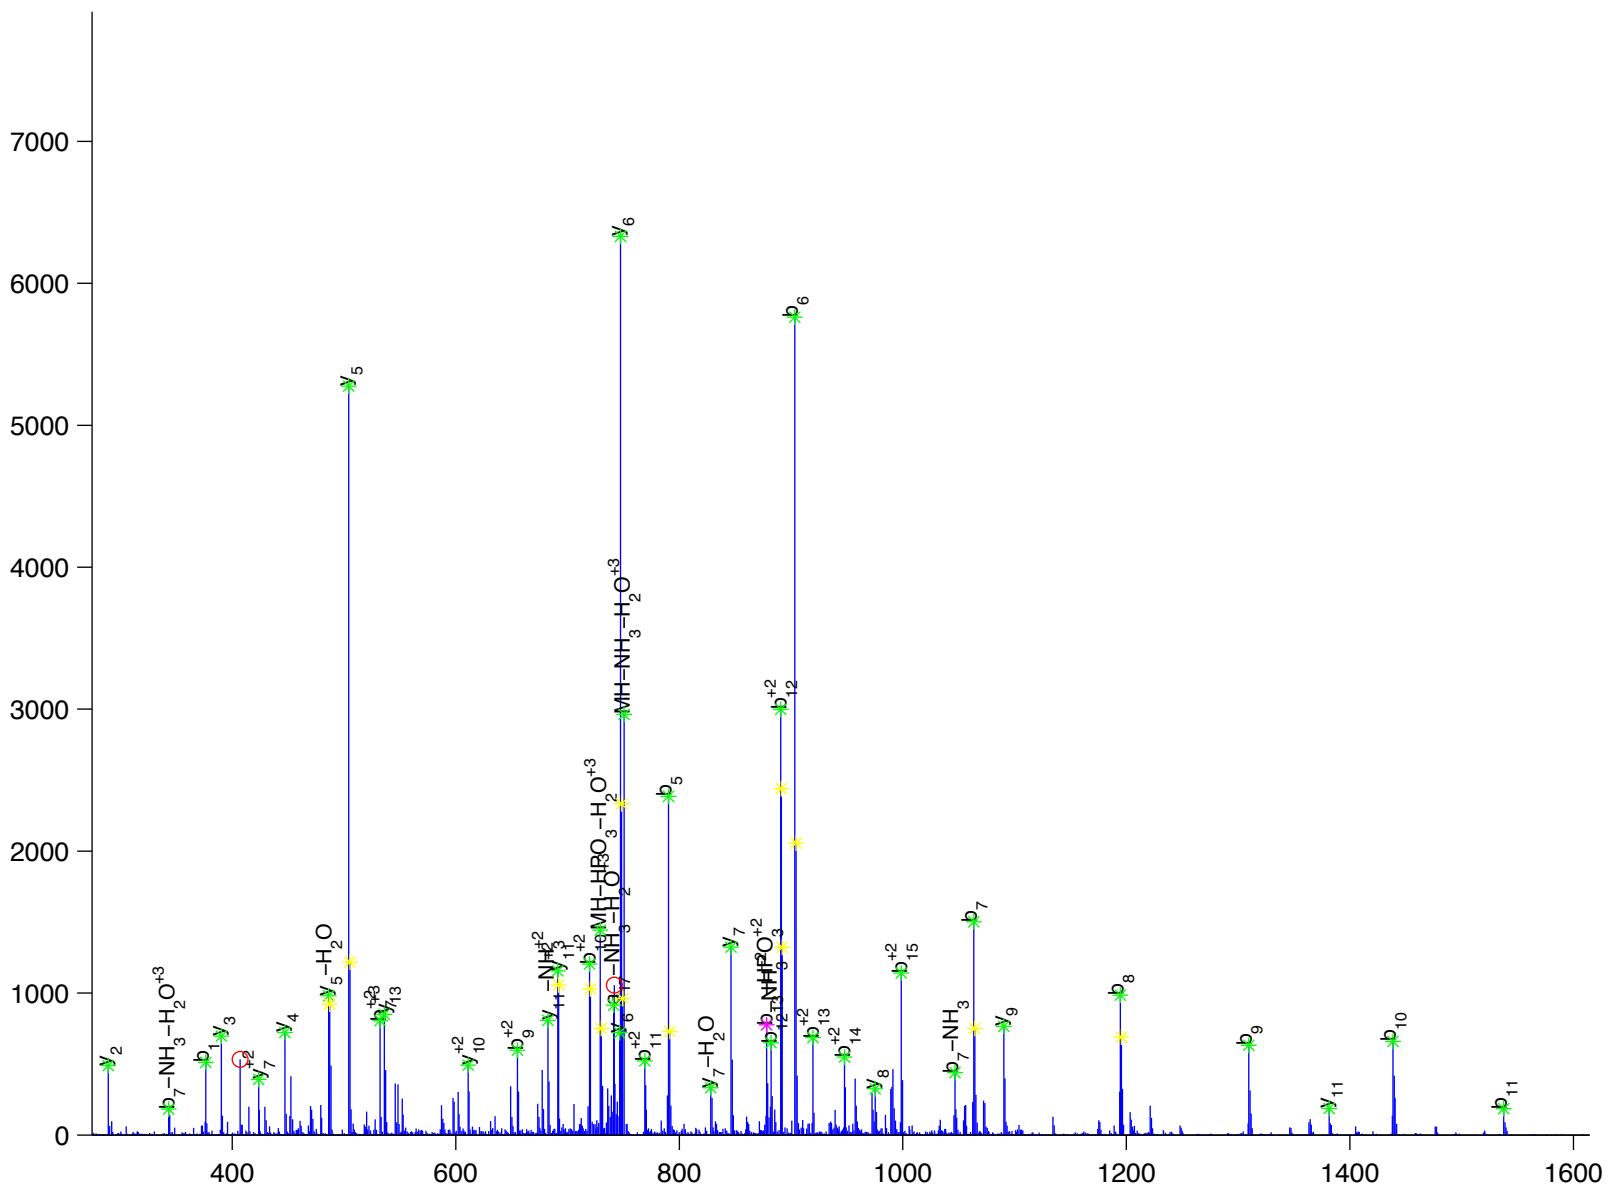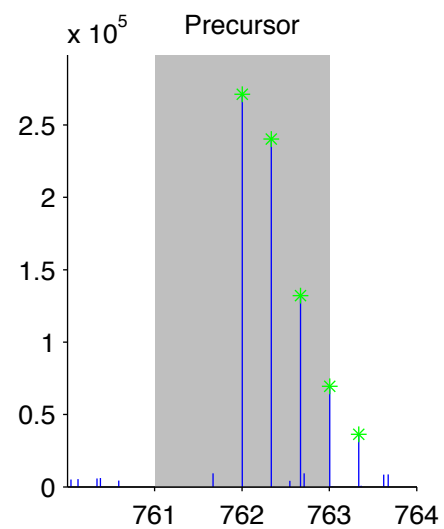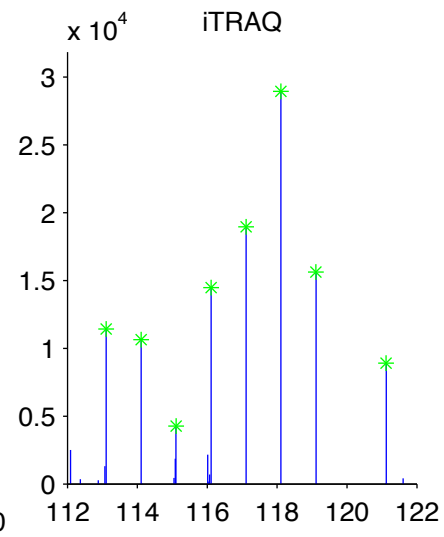



y [ Y ] [ T ] [ L ] [ E ] [ E ] [ I ] [ Q ] K

cytochrome b-5

Charge State: +3

Scan Number: 4894

File Name: 100905ptp1blivers\_ncHFD\_basal.raw

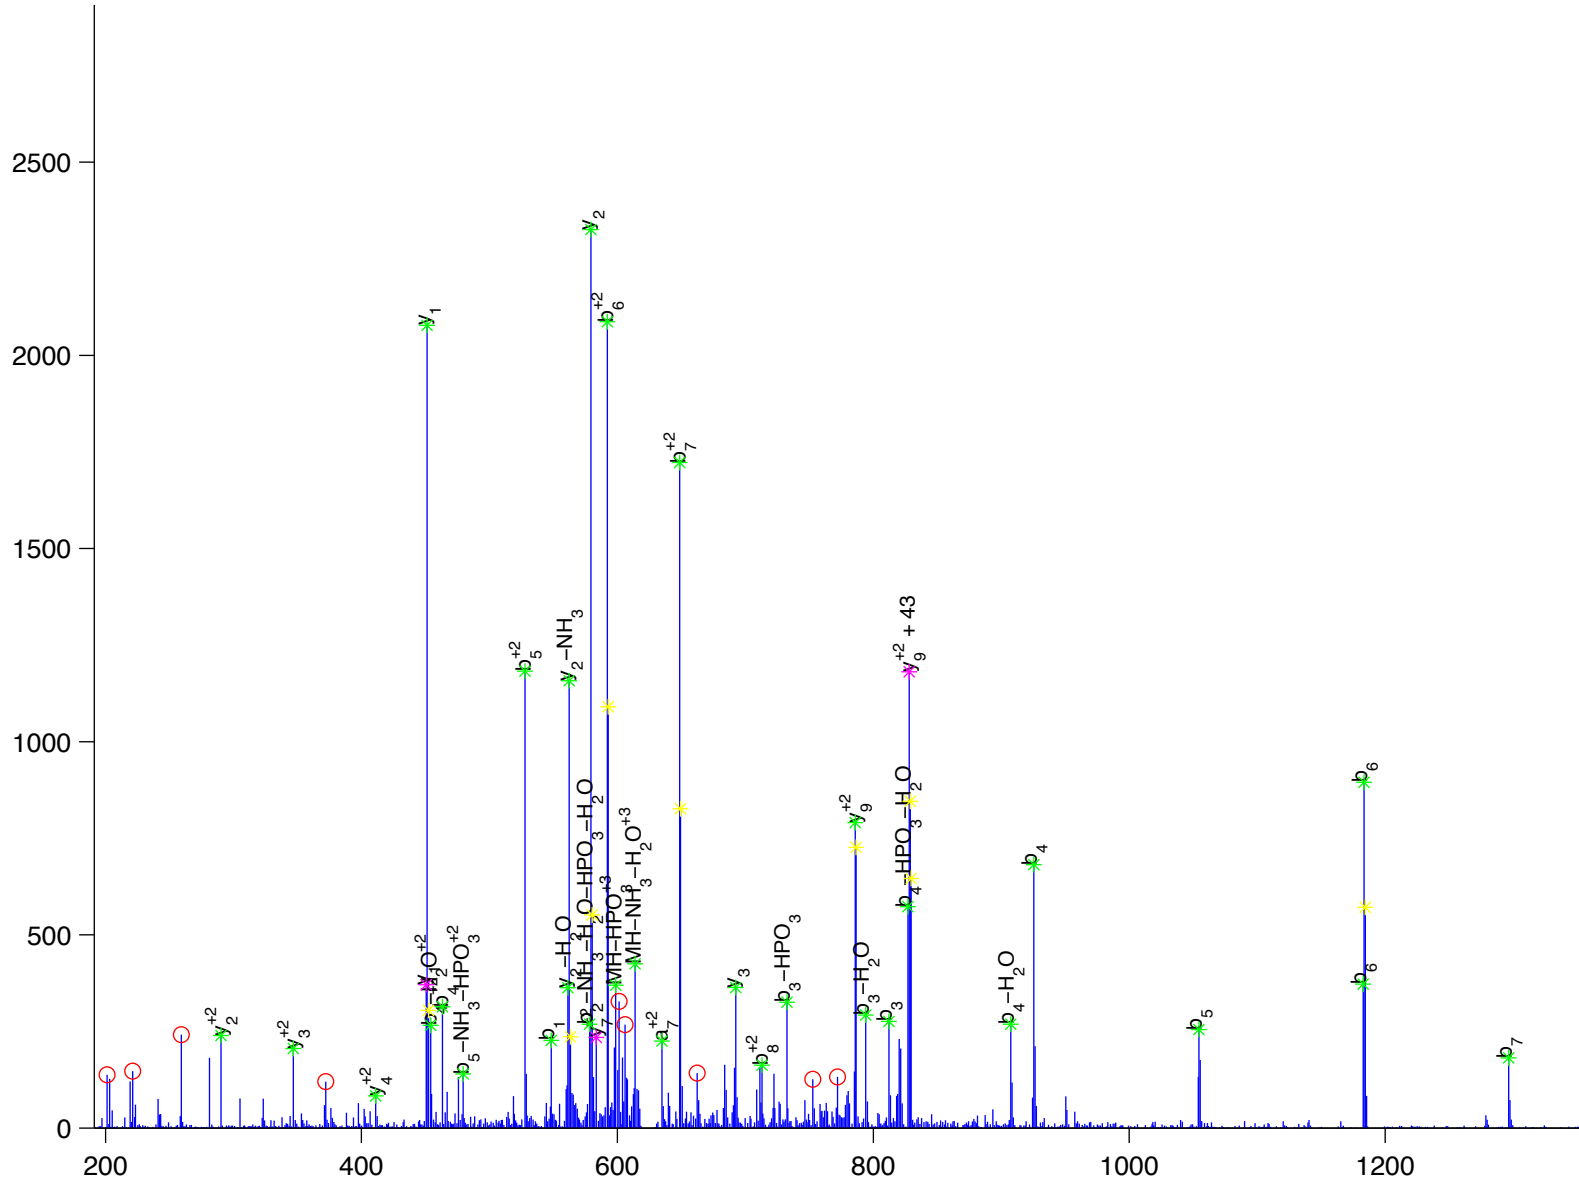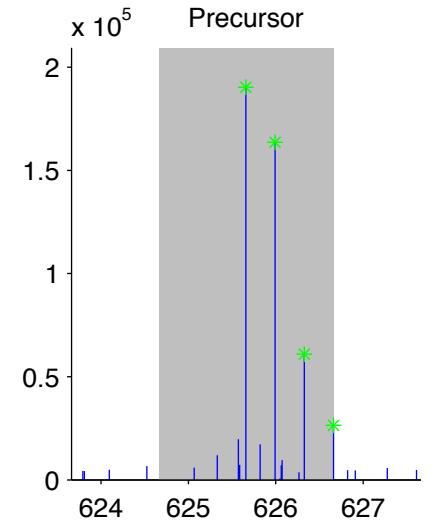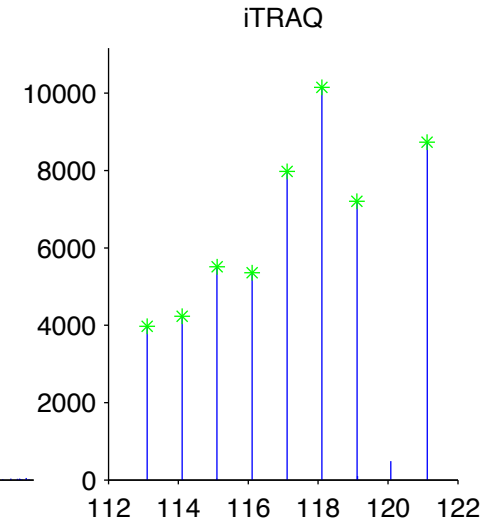

Y [ S ] [ D ] [ y ] [ F ] K

cytochrome P450, family 2, subfamily e, polypeptide 1

Charge State: +2

Scan Number: 4976

File Name: 090806ptp1blivers\_M\_NC2.raw

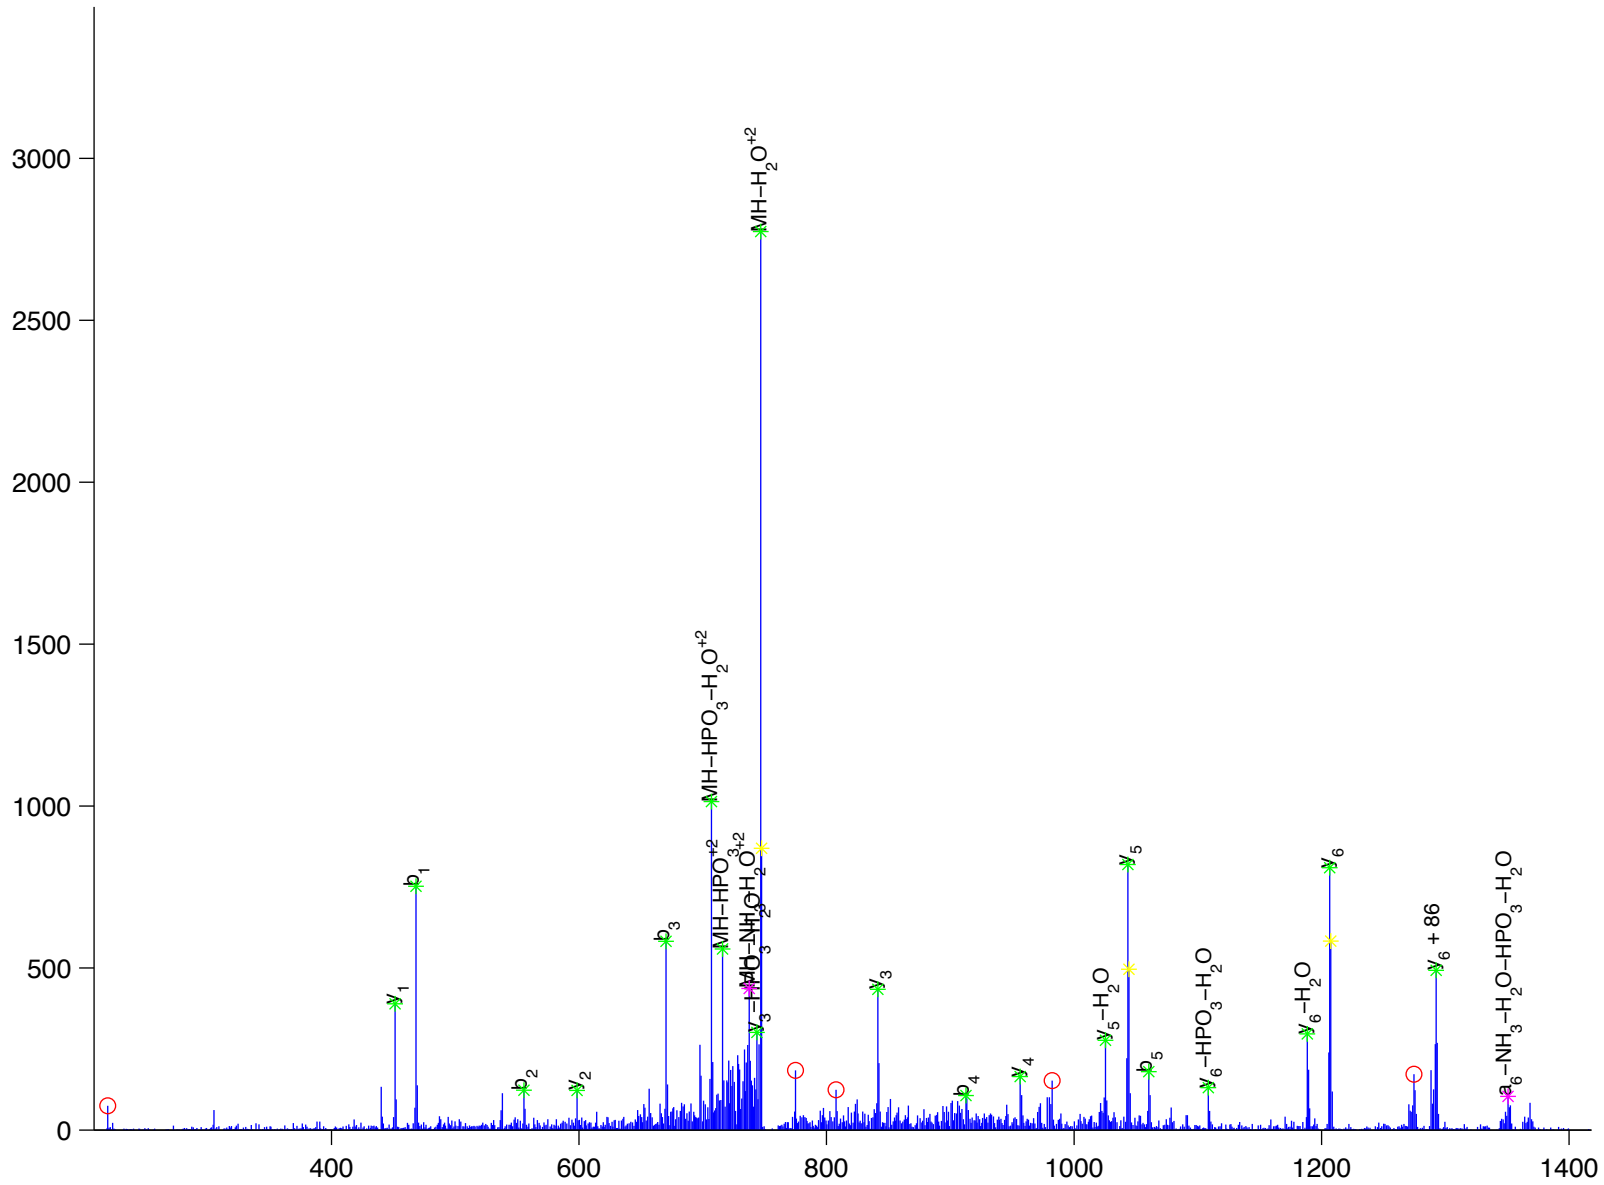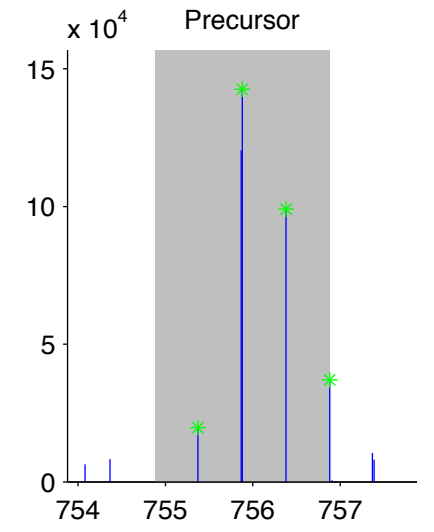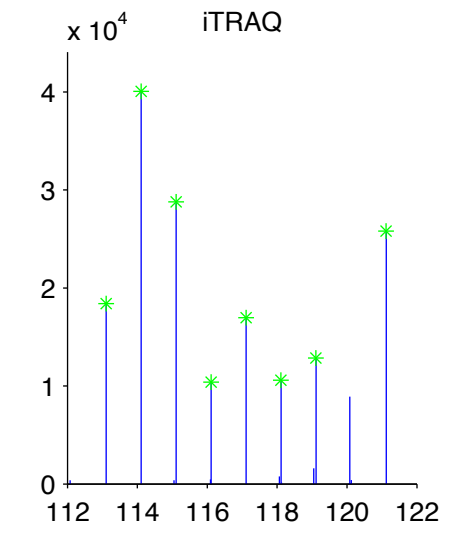

Y[V]L[D]D[Q]y[T]S[S]S[G]A[K]

cytoplasmic tyrosine kinase, Dscr28C related

Charge State: +3

Scan Number: 4508

File Name: 090806ptp1blivers\_M\_NC2.raw

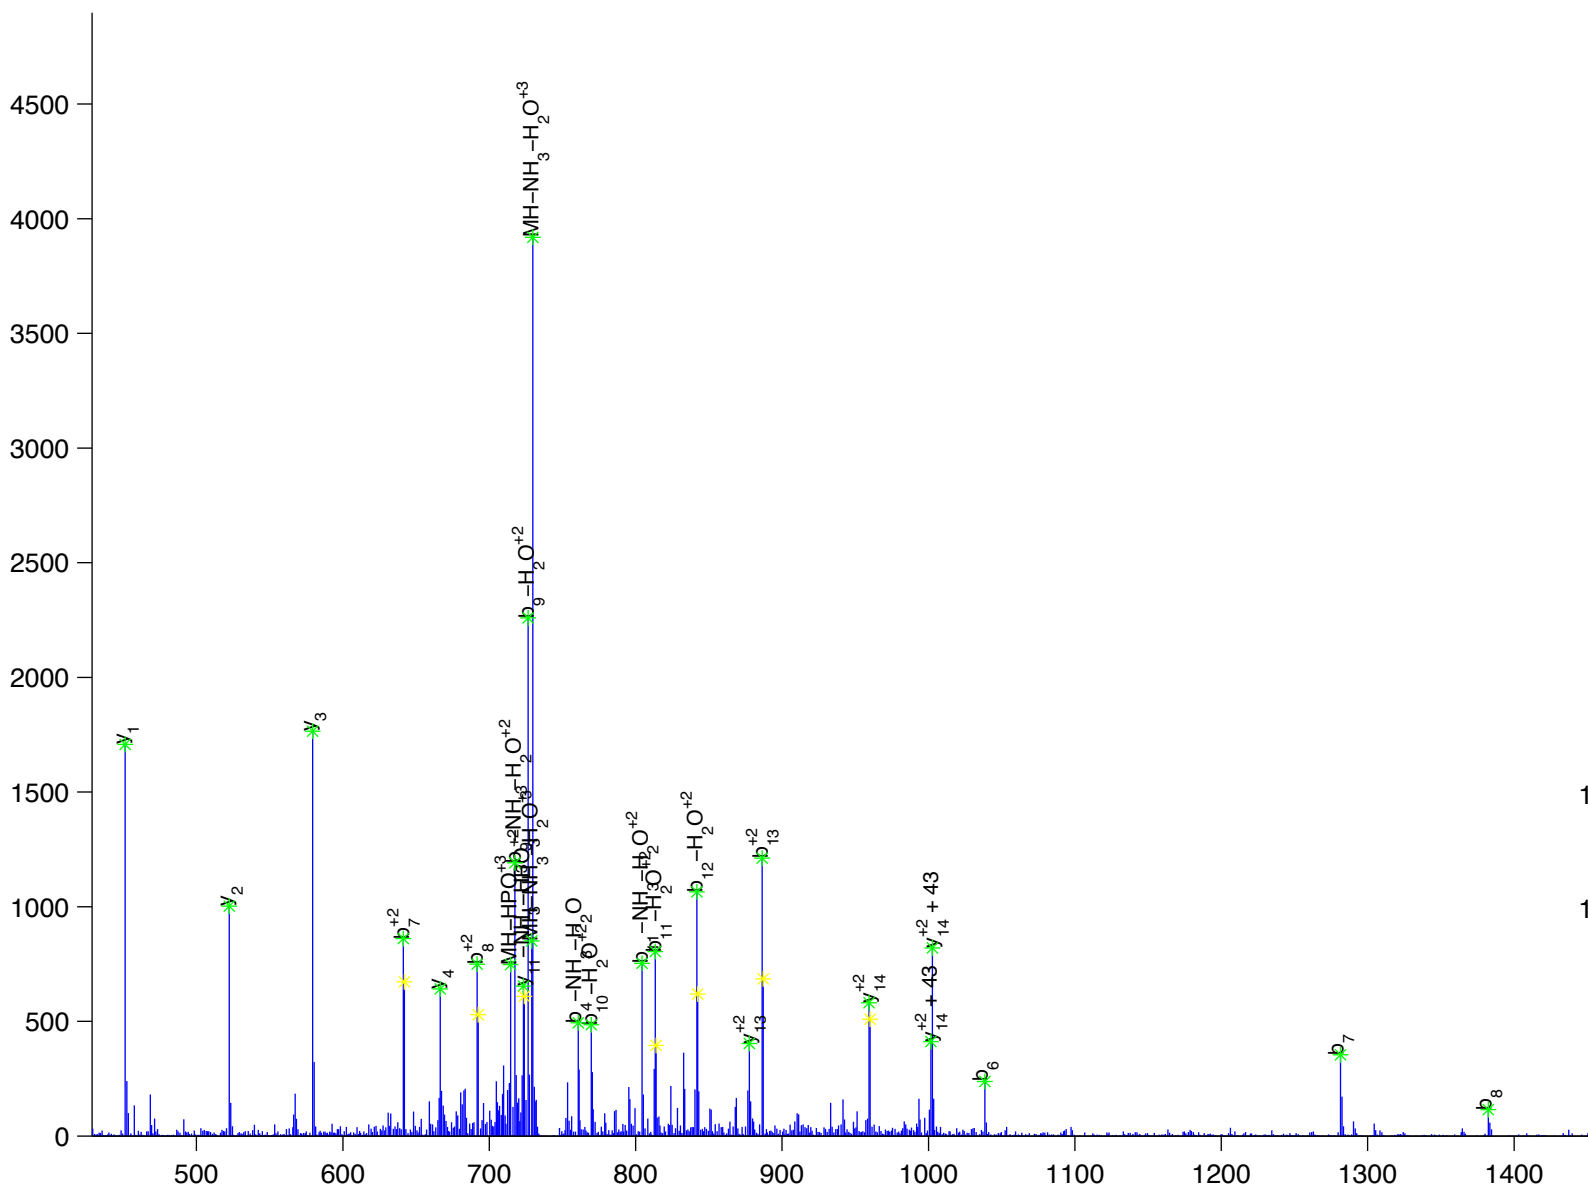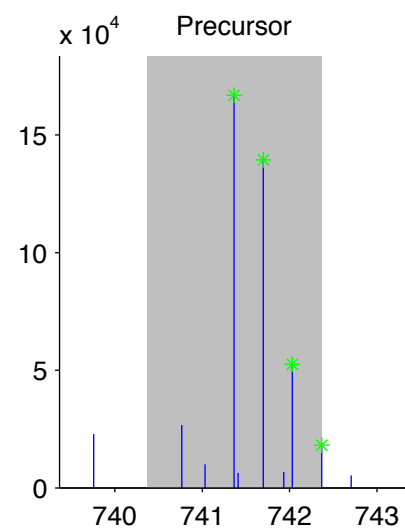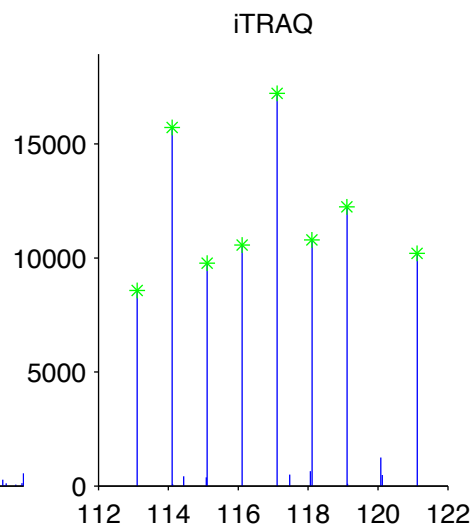

G [R] G [D] y [D] G [I] G [R]

DEAD/H (Asp-Glu-Ala-Asp/His) box polypeptide 3, X-linked

Charge State: +3

Scan Number: 3246

File Name: 091130ptp1blivers\_hfd\_basal2.raw

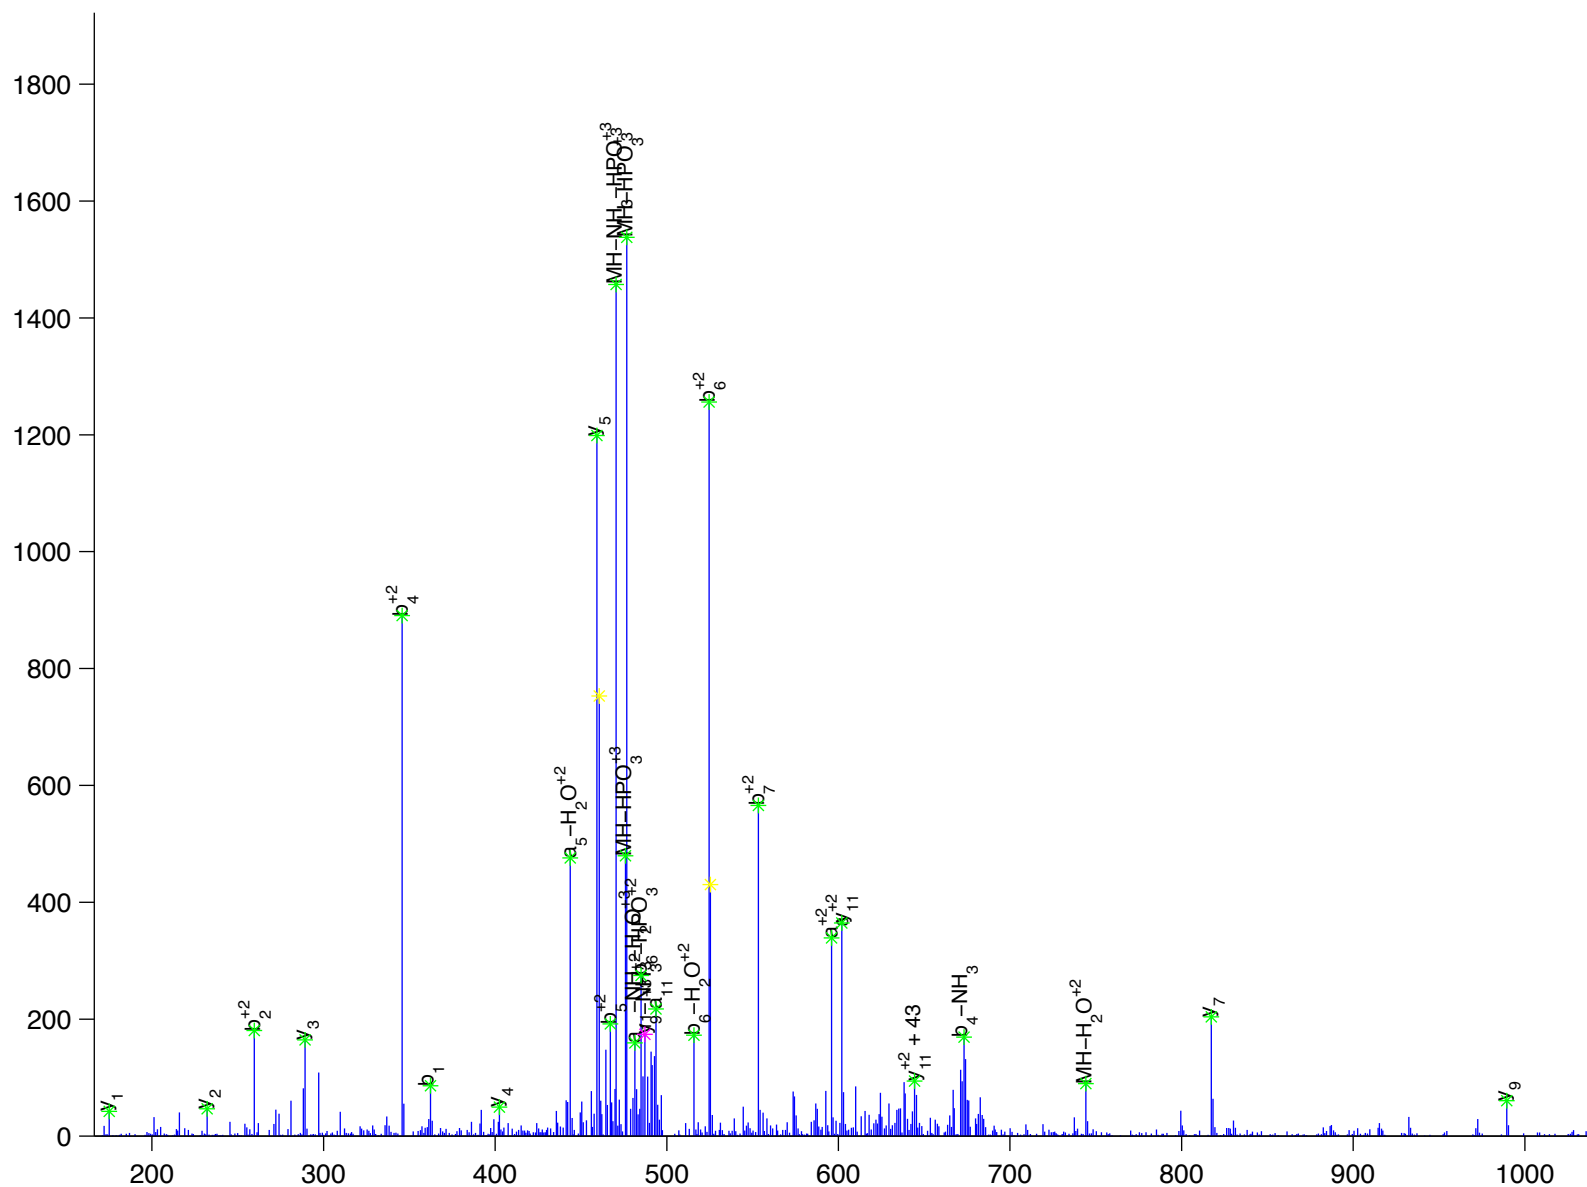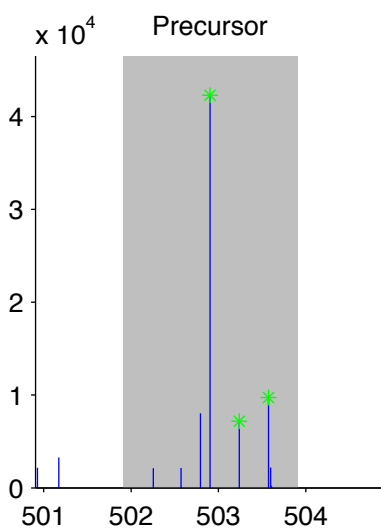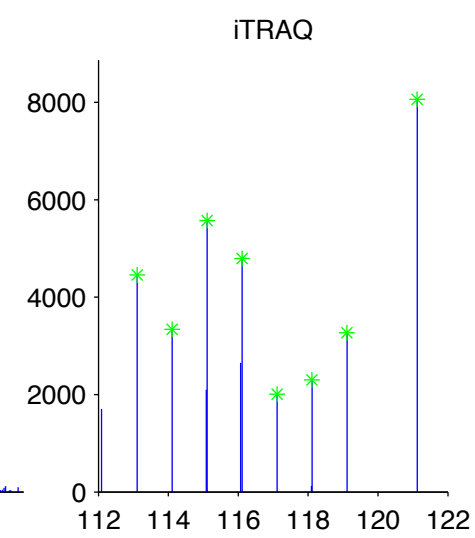

Y[E]M[T]y[S]G[G]G[G]G[G]G[G]G[G]G[G]G[G]T[S]R

desmoplakin isoform 1

Charge State: +3

Scan Number: 4693

File Name: 090807ptp1blivers\_M\_HFD\_basal.raw

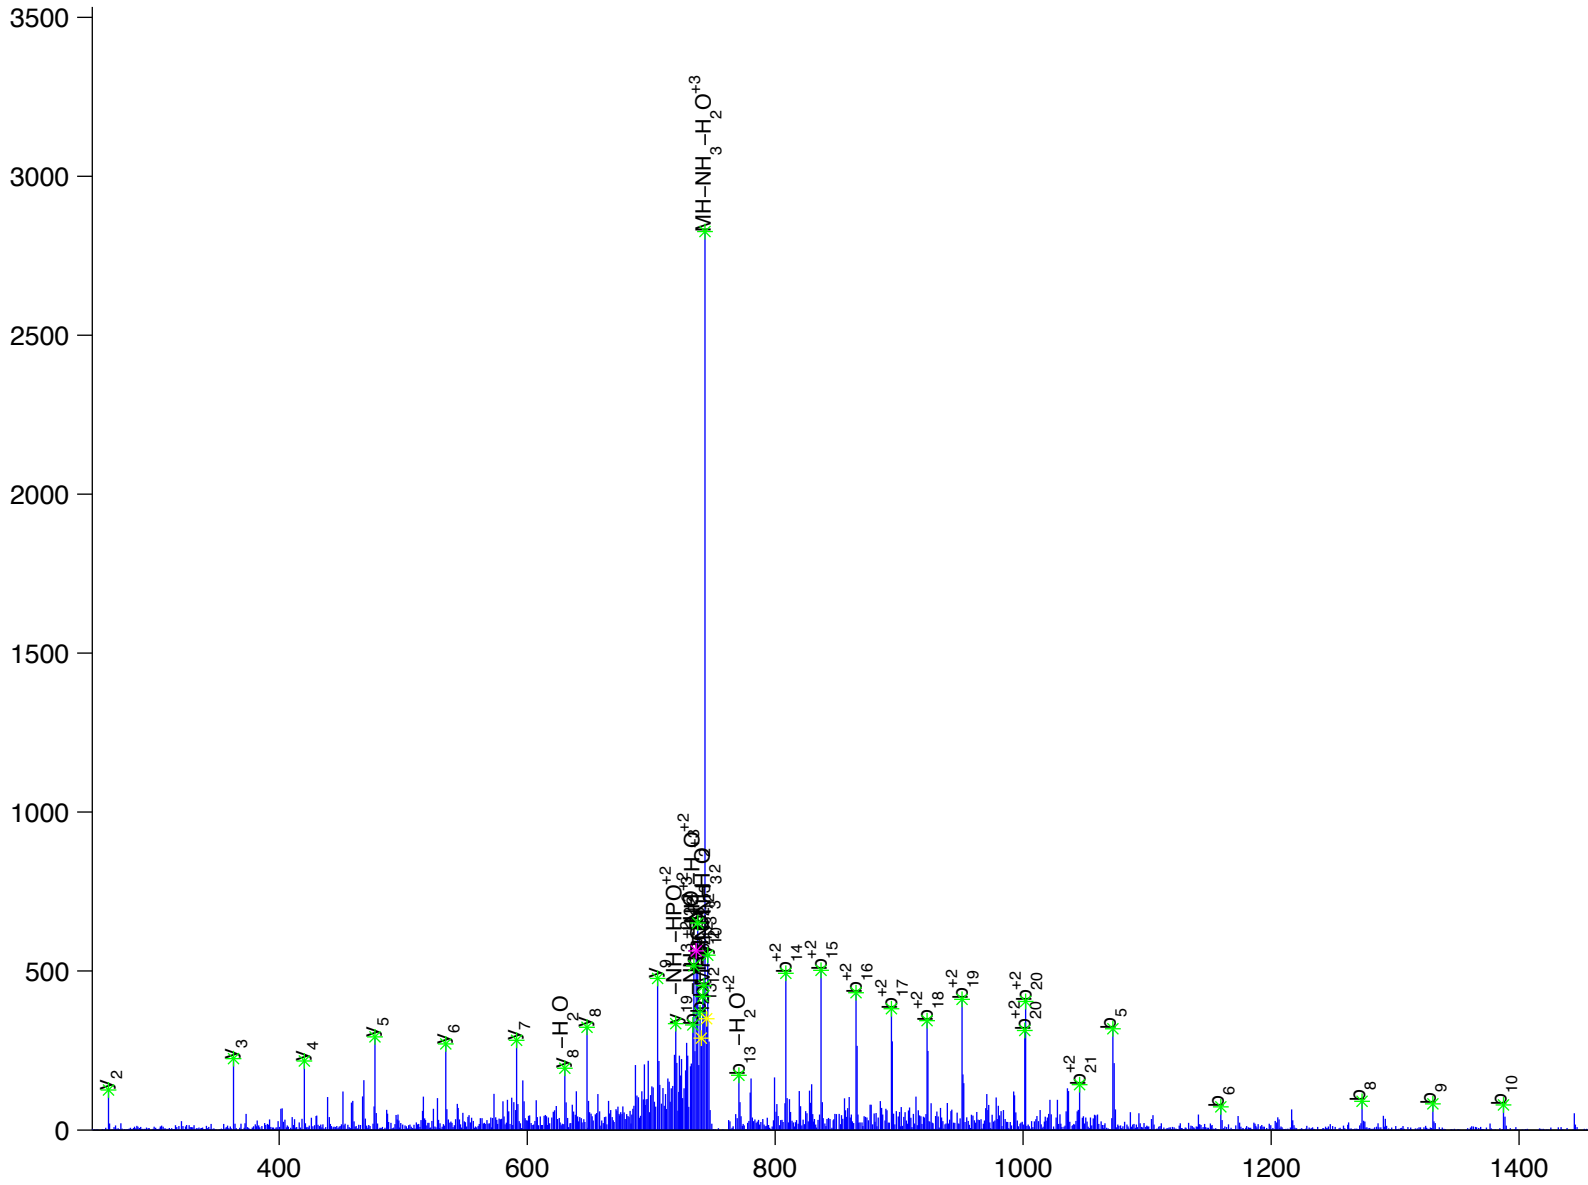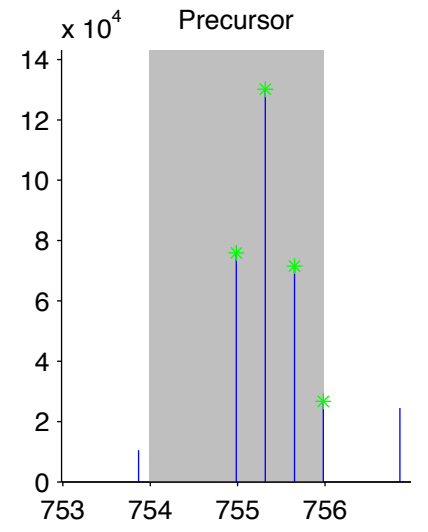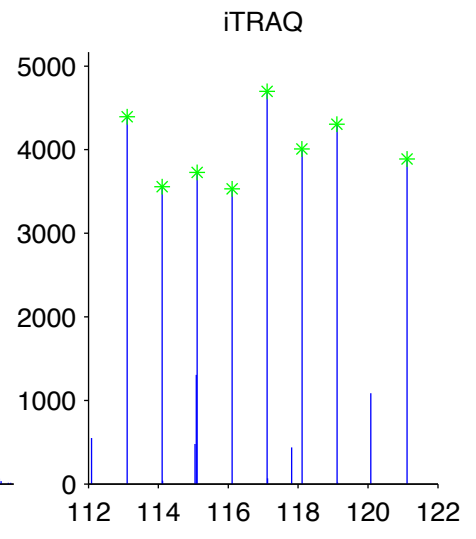

D [ G ] L [ L ] F [ G ] P [ y ] E [ S ] Q [ E ] K

dimethylglycine dehydrogenase precursor

Charge State: +3

Scan Number: 4805

File Name: 100827ptp1blivers\_ncHFD\_basal.raw

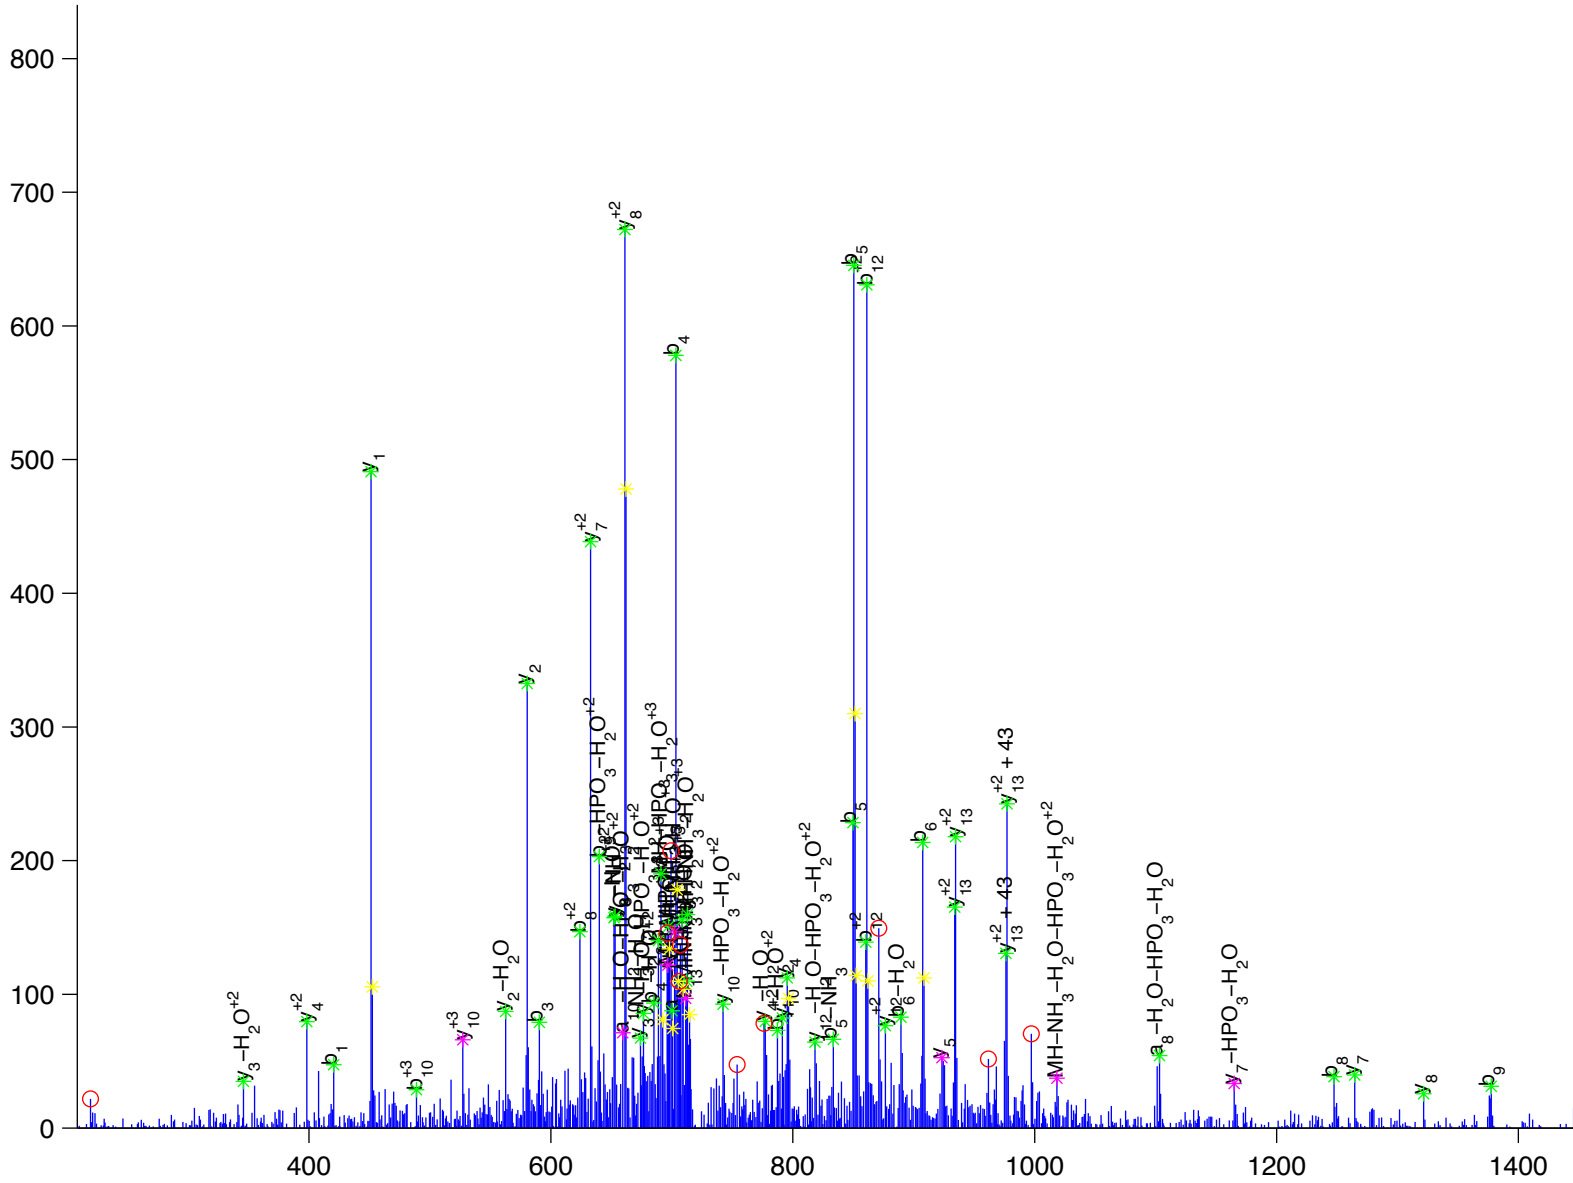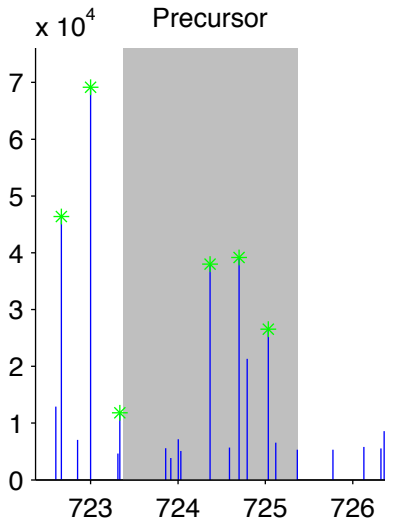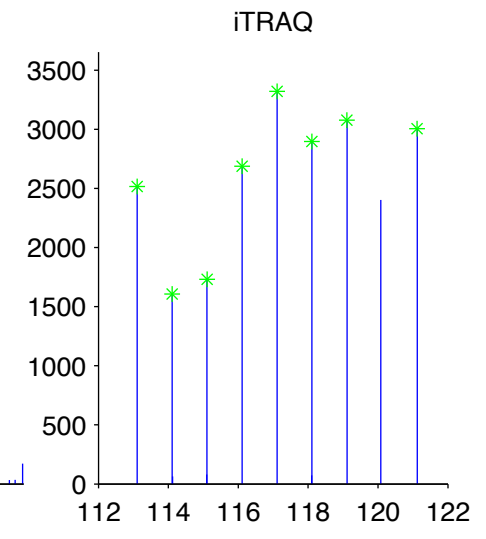

D [ y ] [ H ] [ F ] [ V ] [ T ] [ S ] [ R ]

discs large homolog 1

Charge State: +3

Scan Number: 4059

File Name: 091130ptp1blivers\_hfd\_basal2.raw

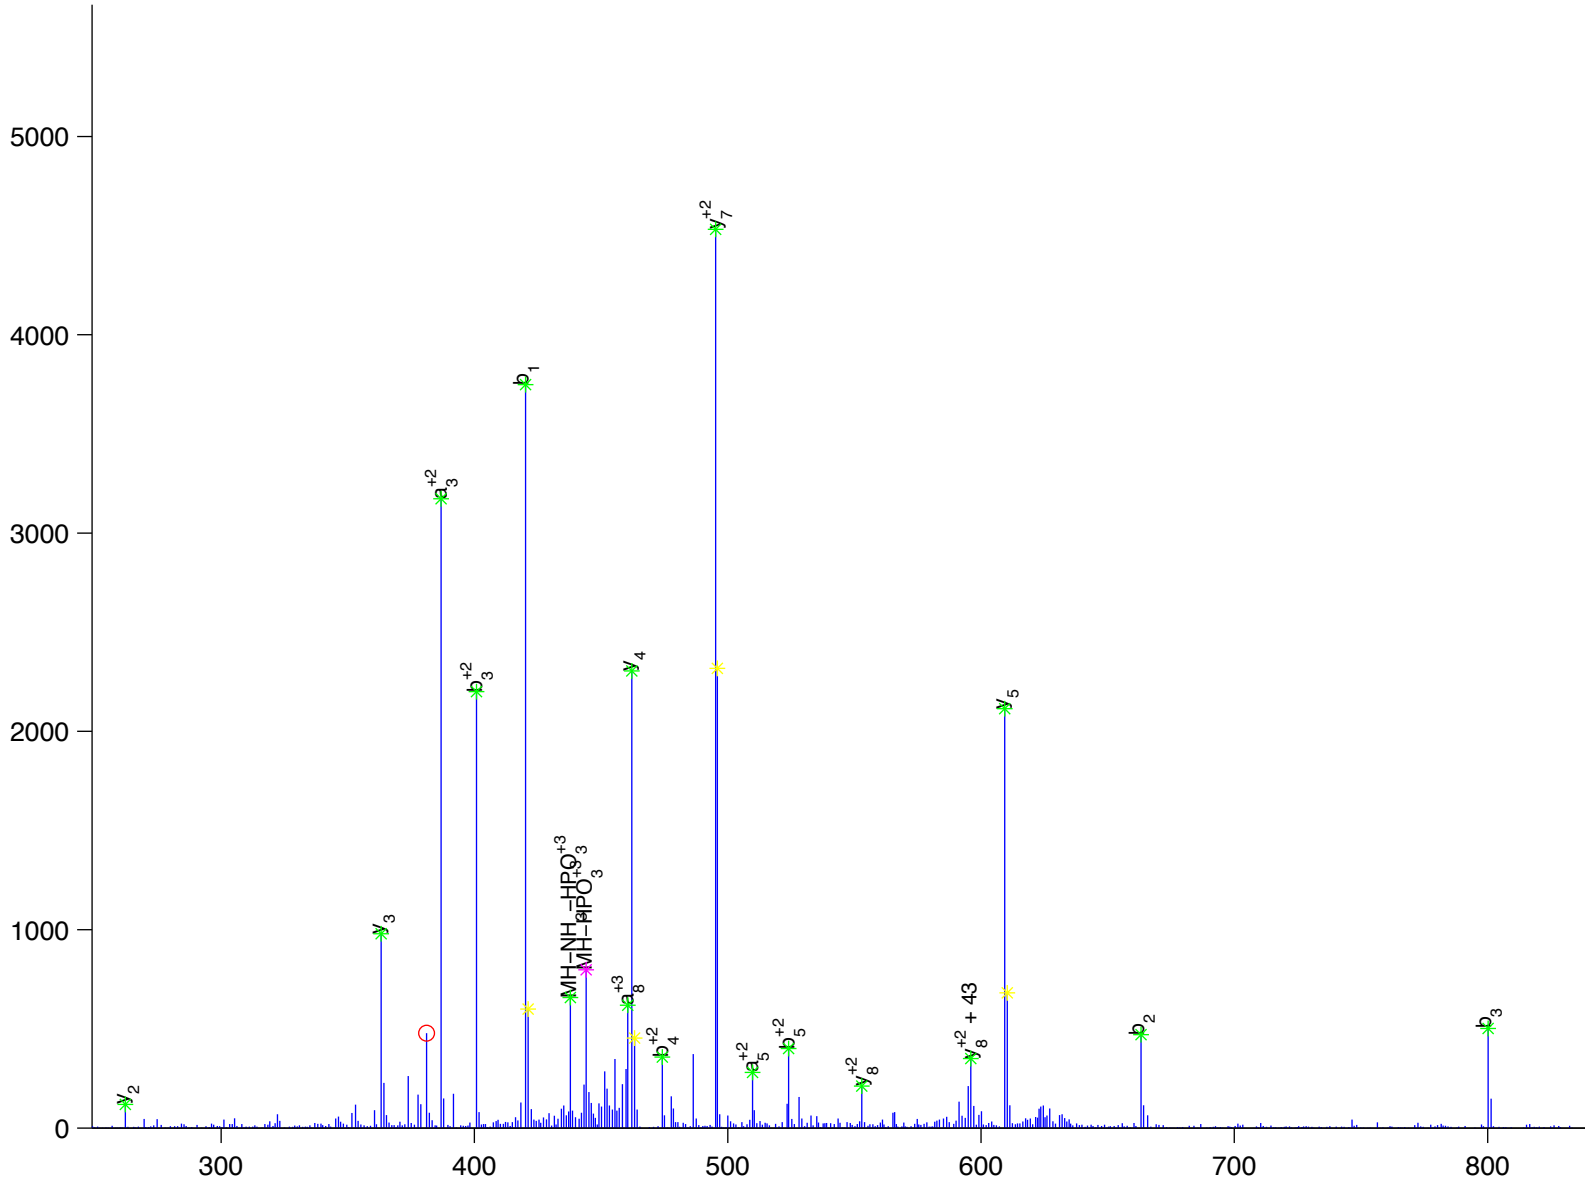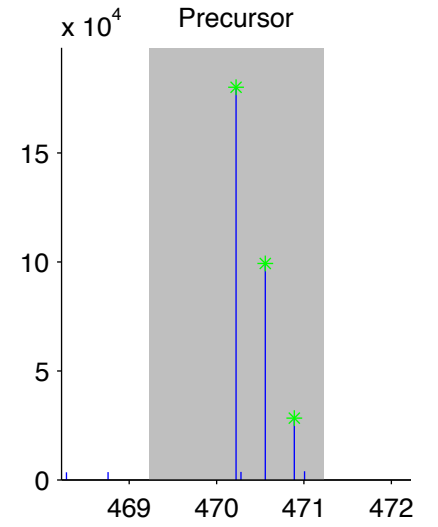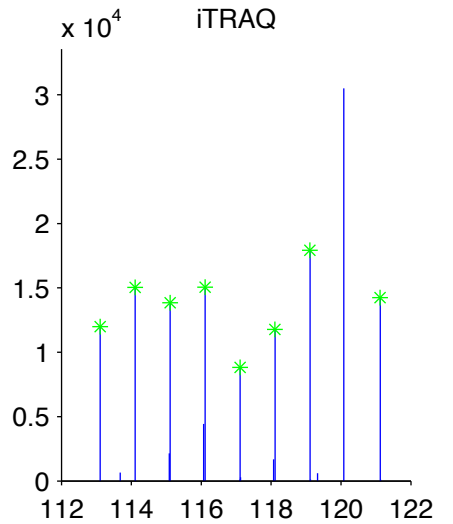

G[F]S[S]D[T]A[L]y[S]Q[V]Q]K

docking protein 1

Charge State: +3

Scan Number: 5378

File Name: 091130ptp1blivers\_hfd\_basal2.raw

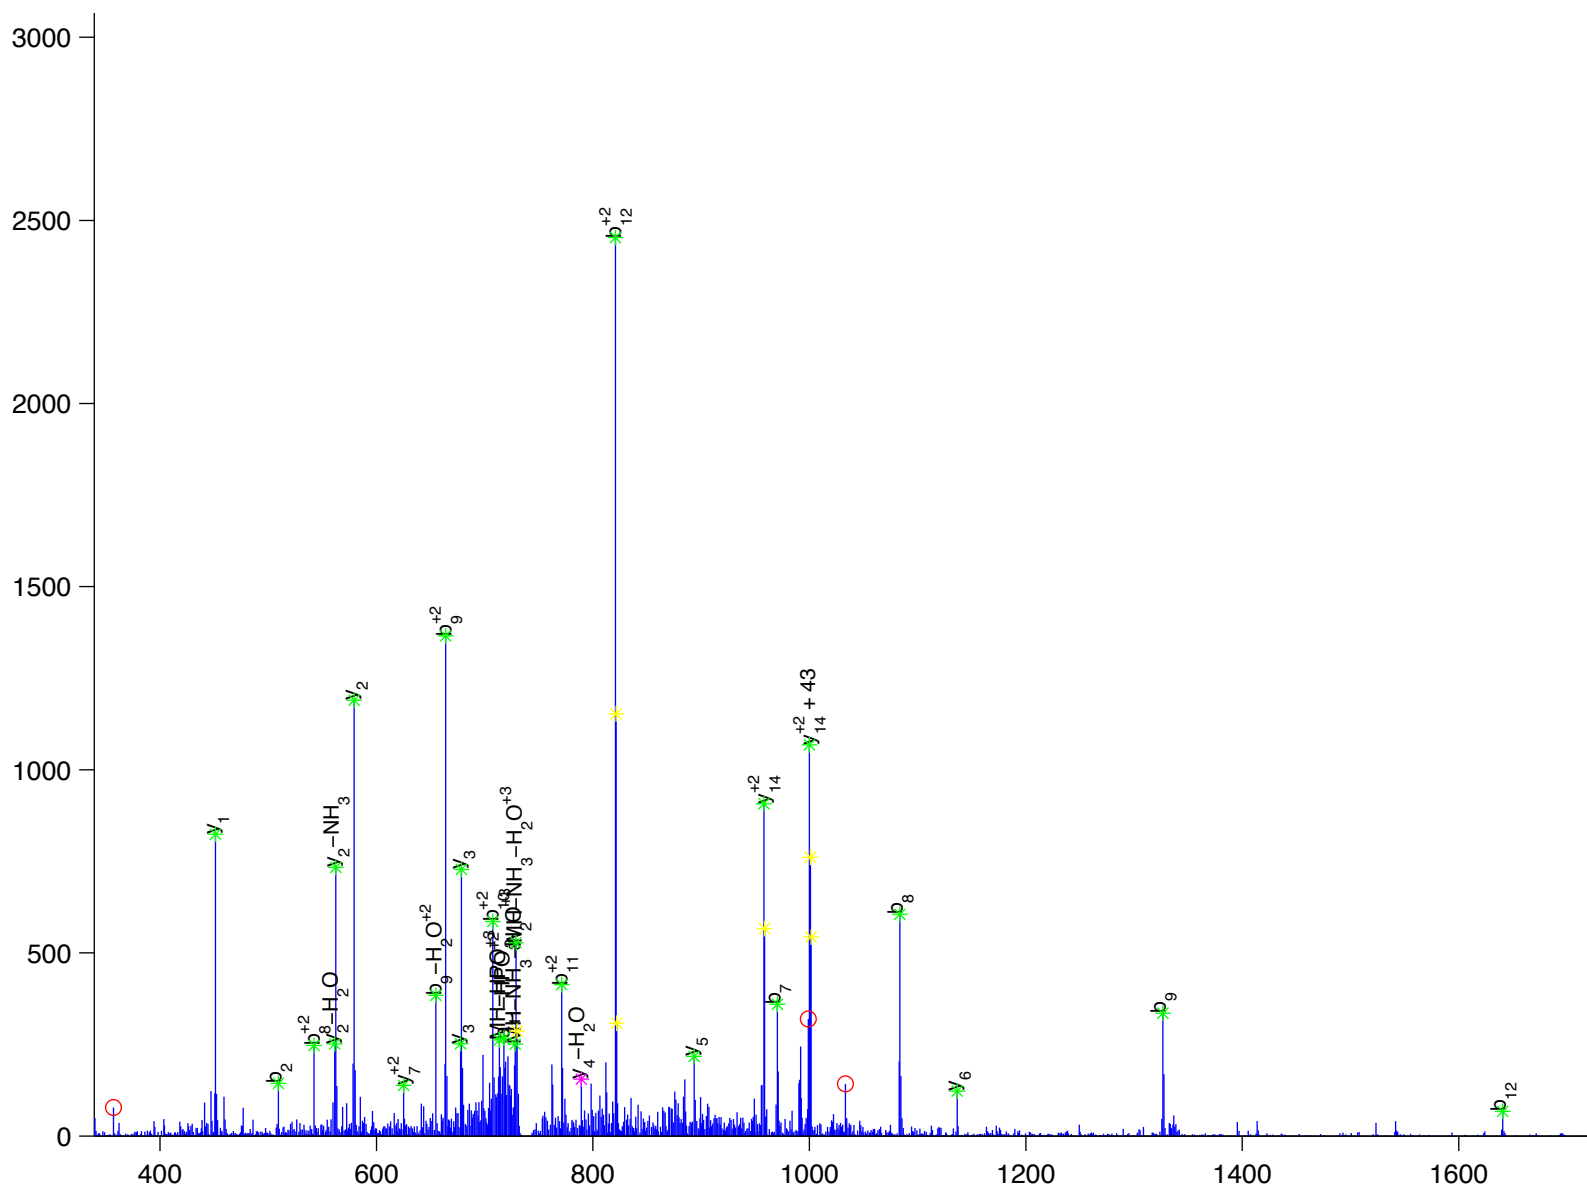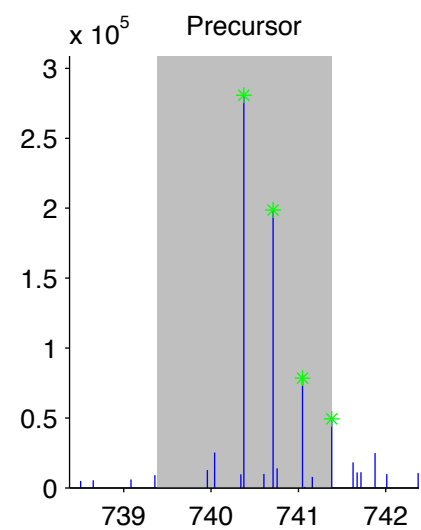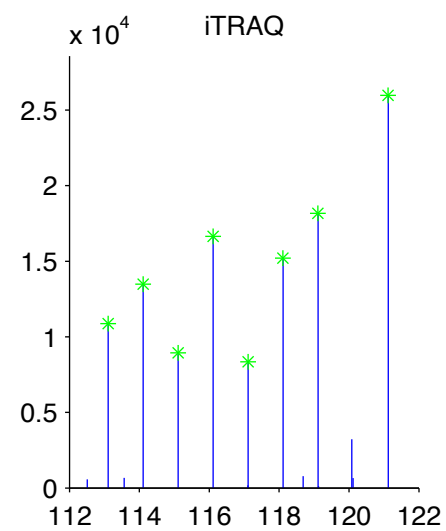





L [ K ] E [ E ] G [ Y ] E [ L ] P [ Y ] N [ P ] A [ T ] D [ D ] y [ A ] V [ P ] P [ P ] R

docking protein 1

Charge State: +4

Scan Number: 6341

File Name: 091130ptp1blivers\_hfd\_basal2.raw

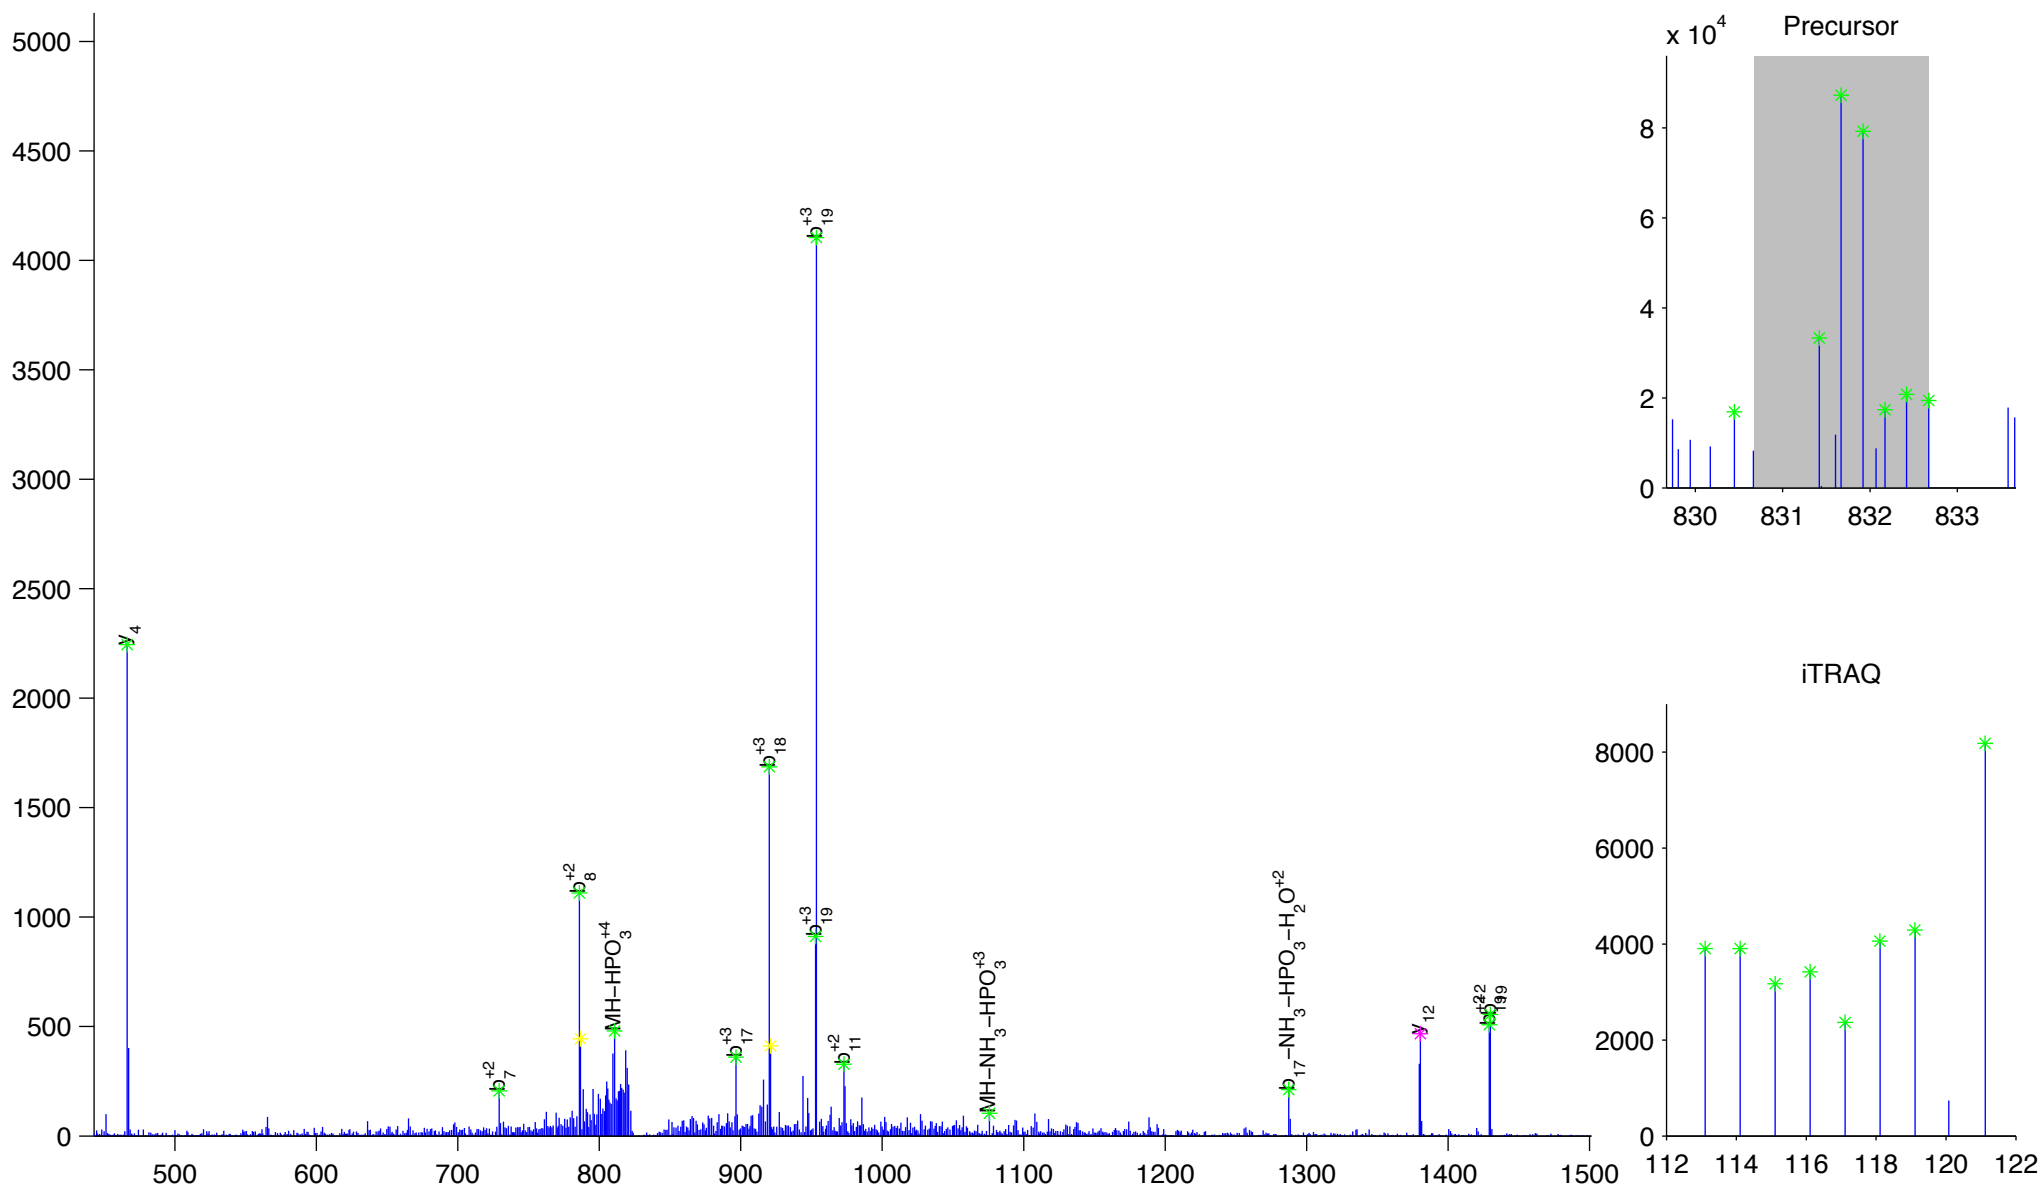

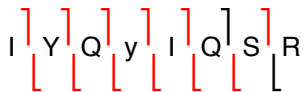

dual-specificity tyrosine-(Y)-phosphorylation regulated kinase 1b isoform a

Charge State: +3

Scan Number: 981

File Name: HJ072909\_HFD\_E1\_2.raw

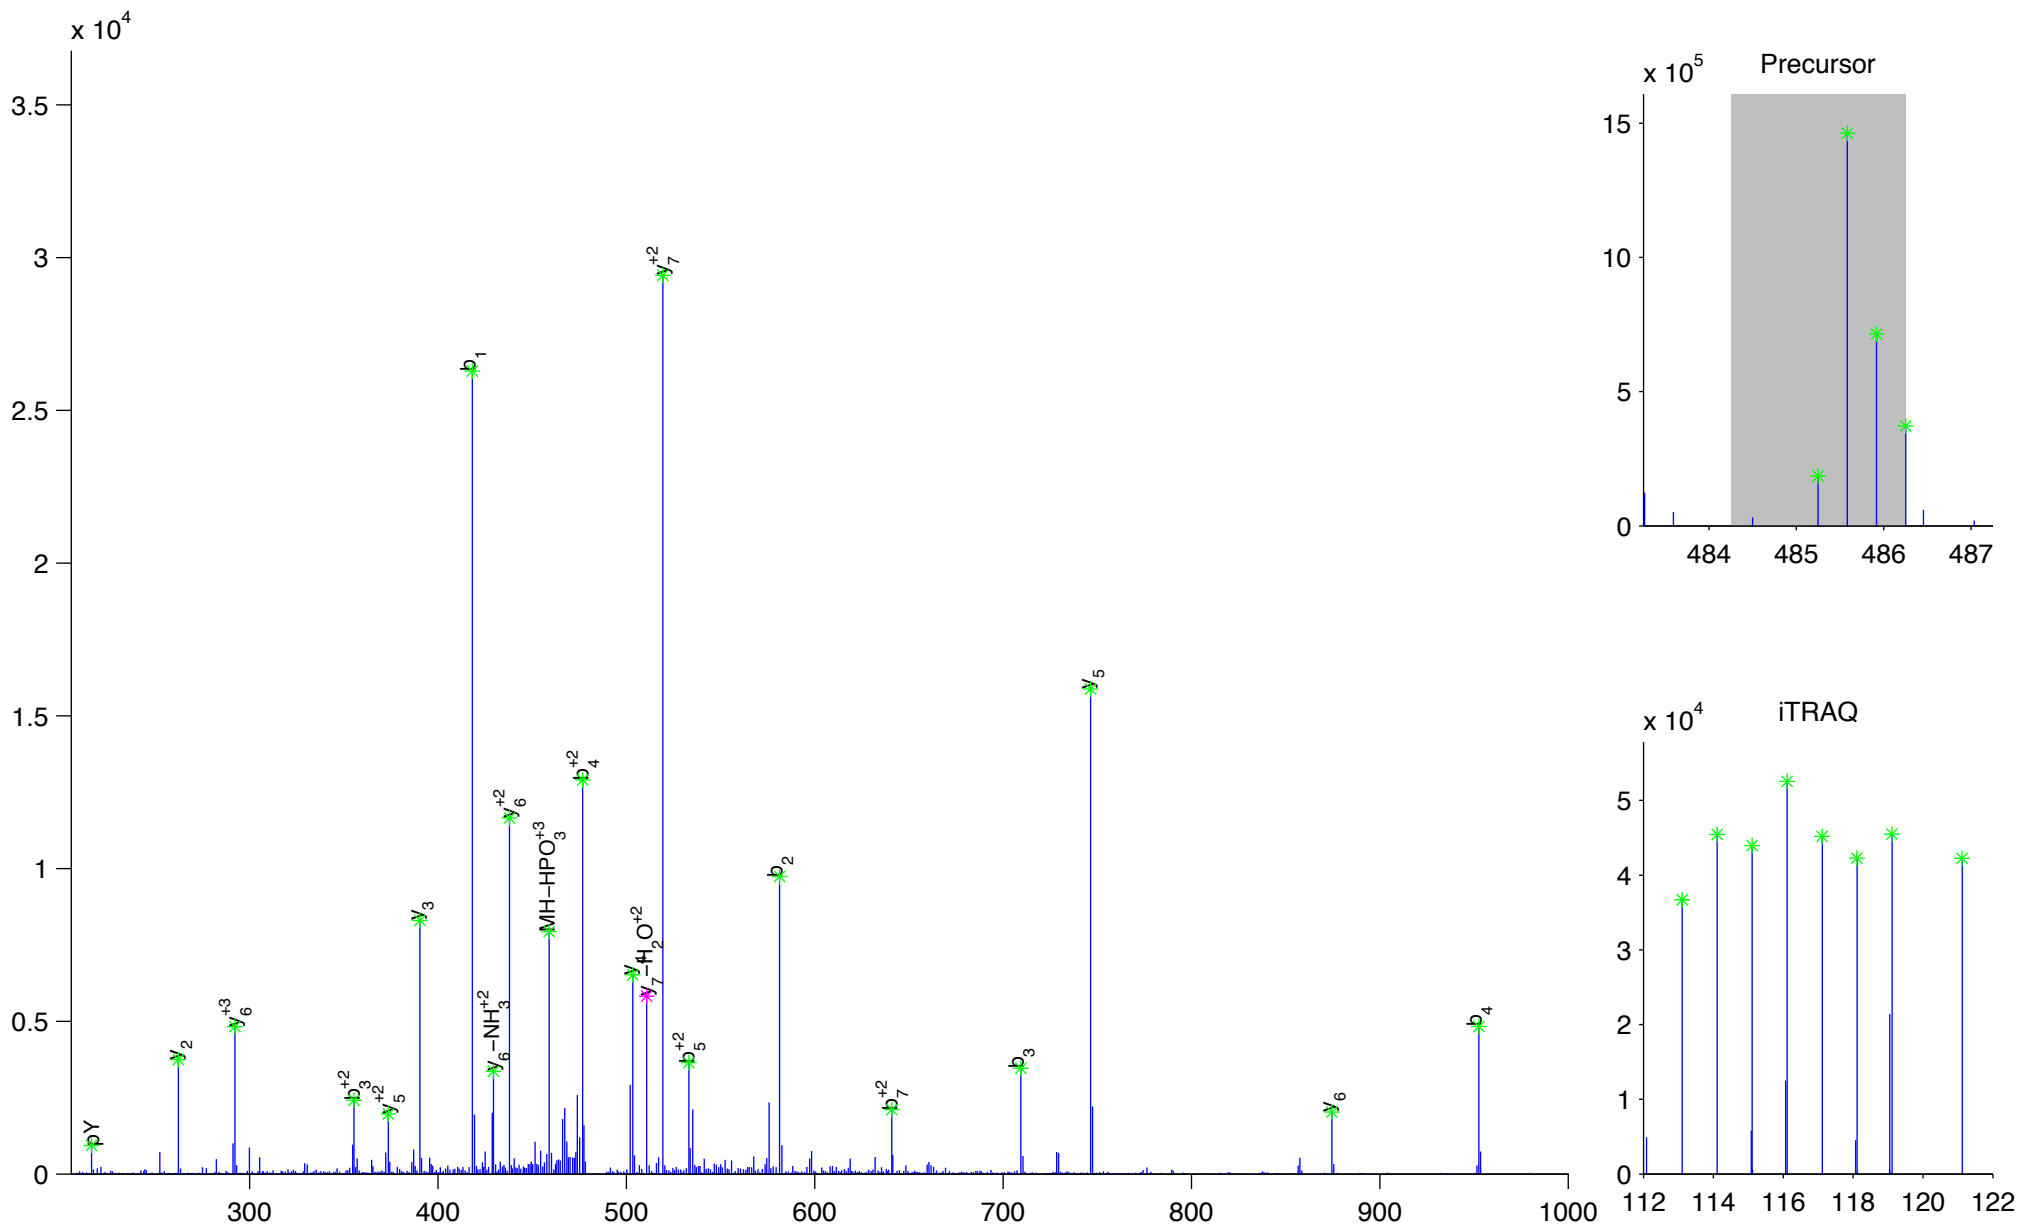

V [ Y ] T [ y ] I [ Q ] S [ R ]

dual-specificity tyrosine-(Y)-phosphorylation regulated kinase 4

Charge State: +2

Scan Number: 5336

File Name: 091130ptp1blivers\_hfd\_basal2.raw

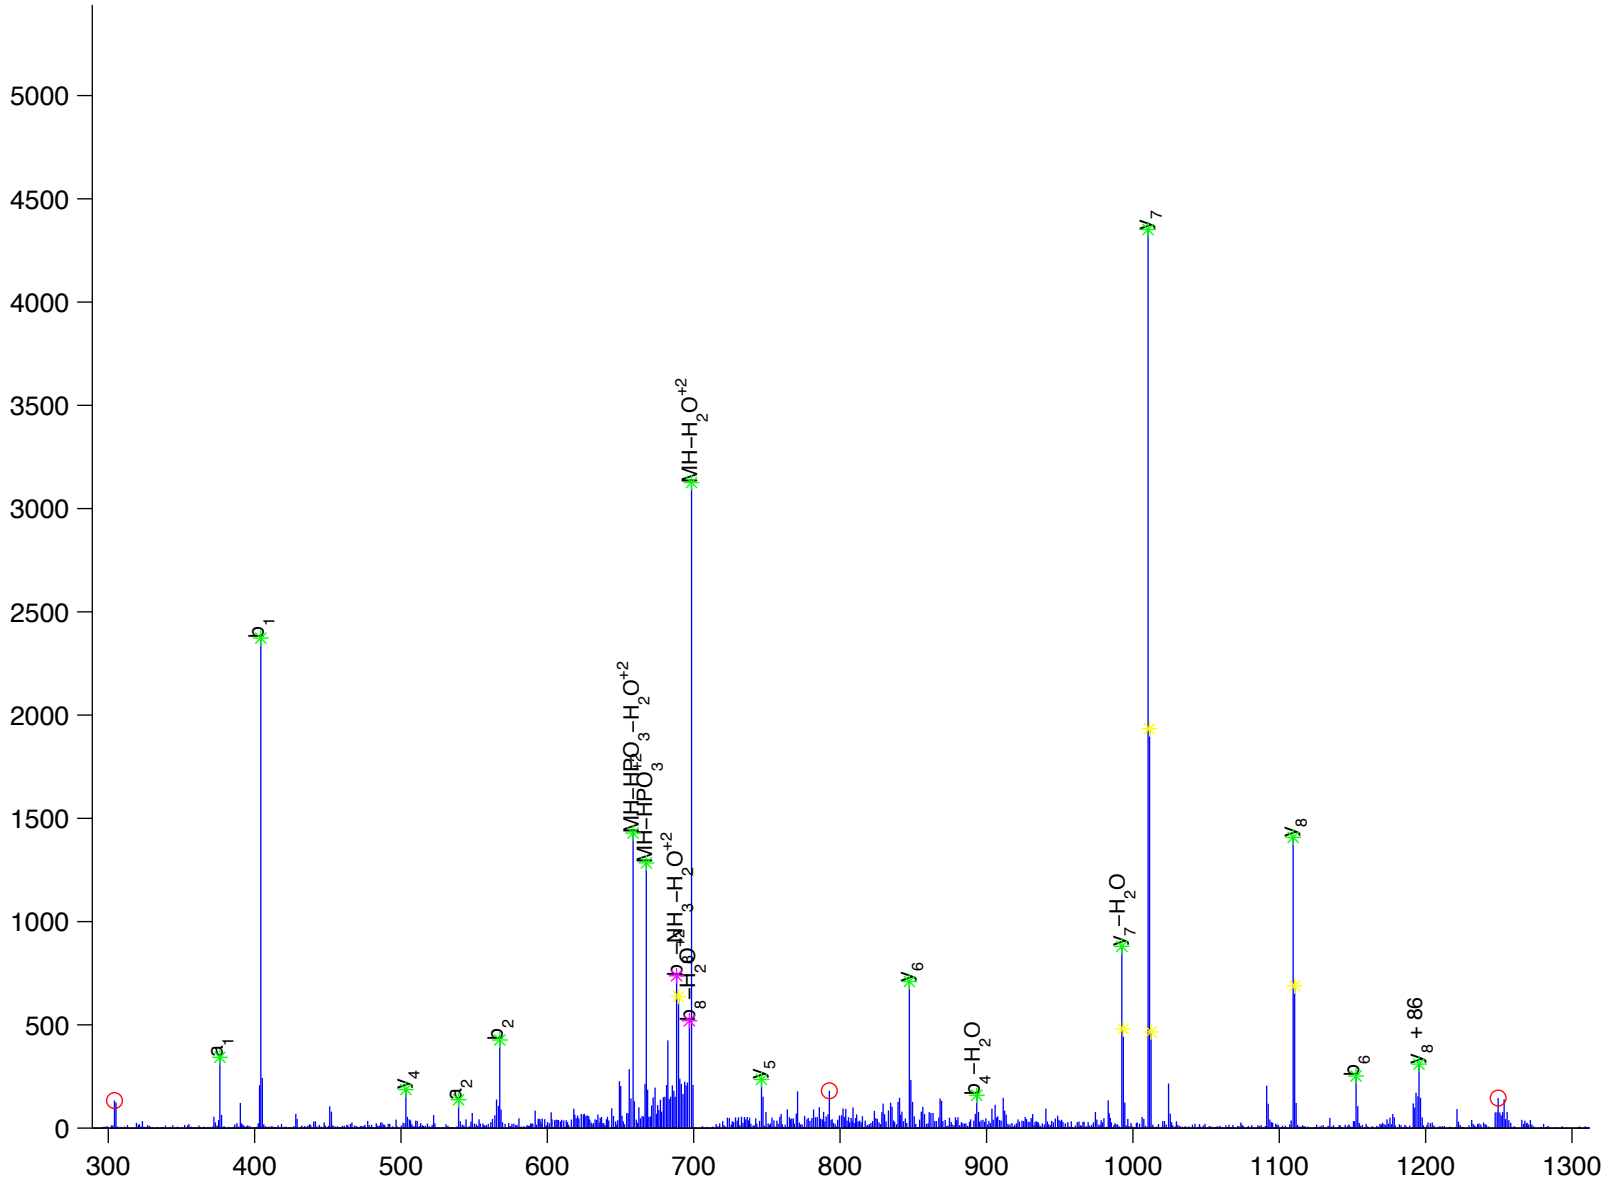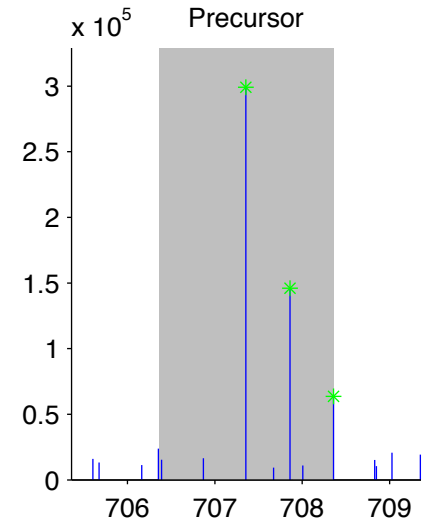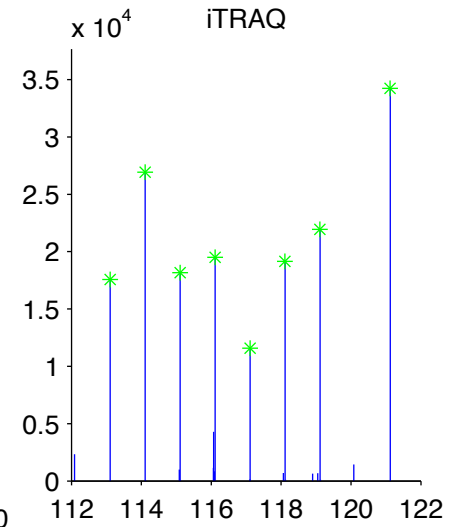

N V y Y E L N D V R

enhancer trap locus 4

Charge State: +2

Scan Number: 5527

File Name: 090806ptp1blivers\_M\_NC2.raw

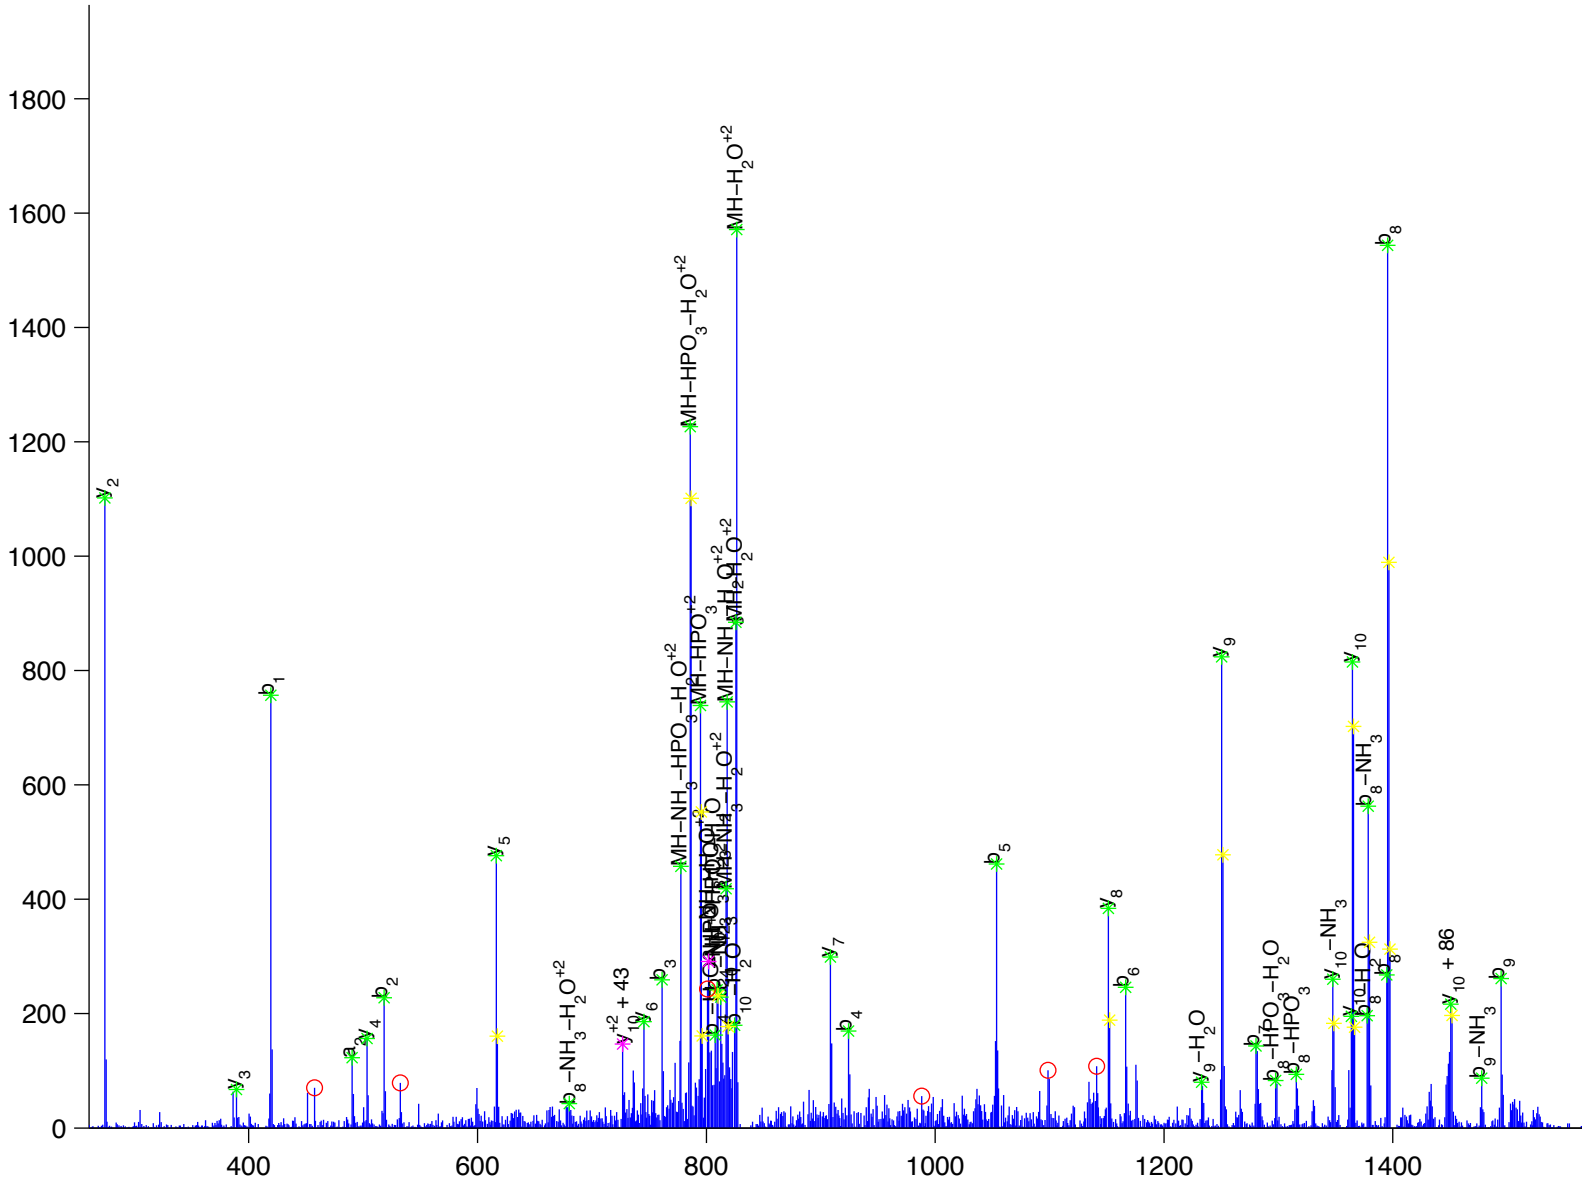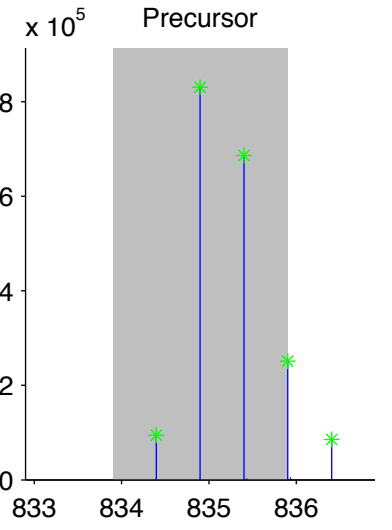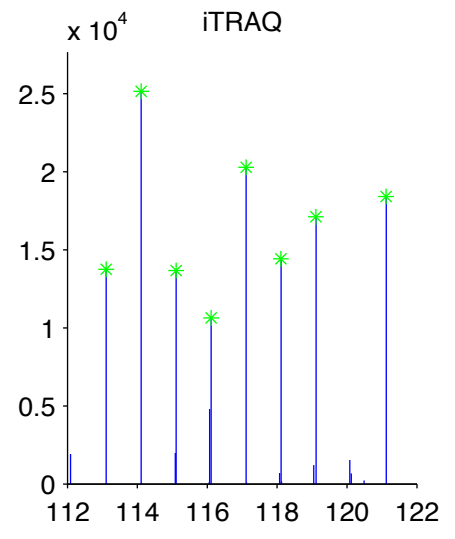

G [ N ] [ P ] [ T ] [ V ] [ E ] [ V ] [ D ] [ L ] y [ T ] [ A ] K

enolase 2, gamma neuronal

Charge State: +3

Scan Number: 4995

File Name: 100611ptp1blivers\_nc\_basal.raw

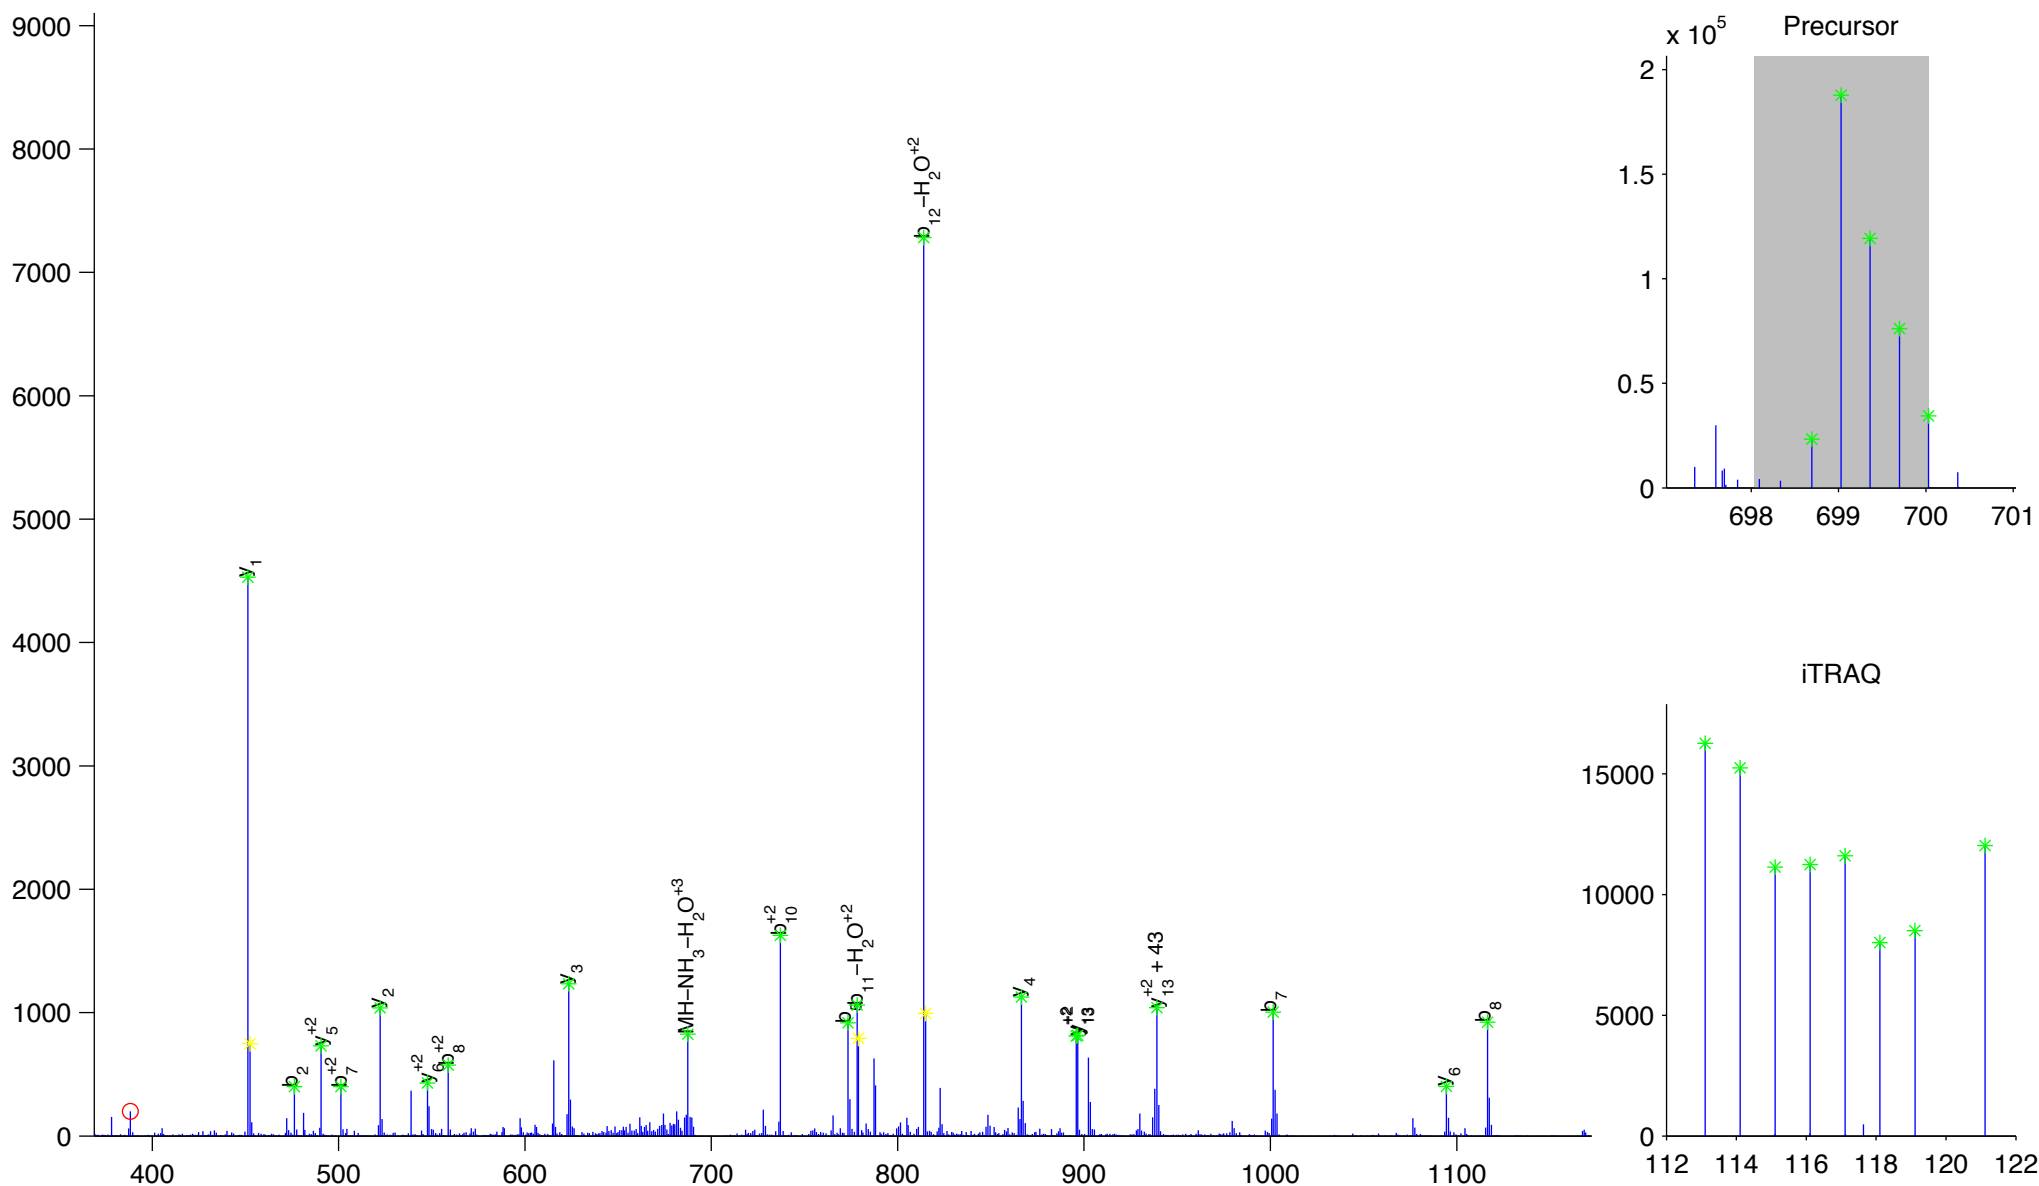



T [ y ] V [ D ] P [ H ] T [ y ] E [ D ] P [ N ] Q [ A ] V [ L ] K

Eph receptor A2

Charge State: +3

Scan Number: 4905

File Name: 091130ptp1blivers\_hfd\_basal2.raw

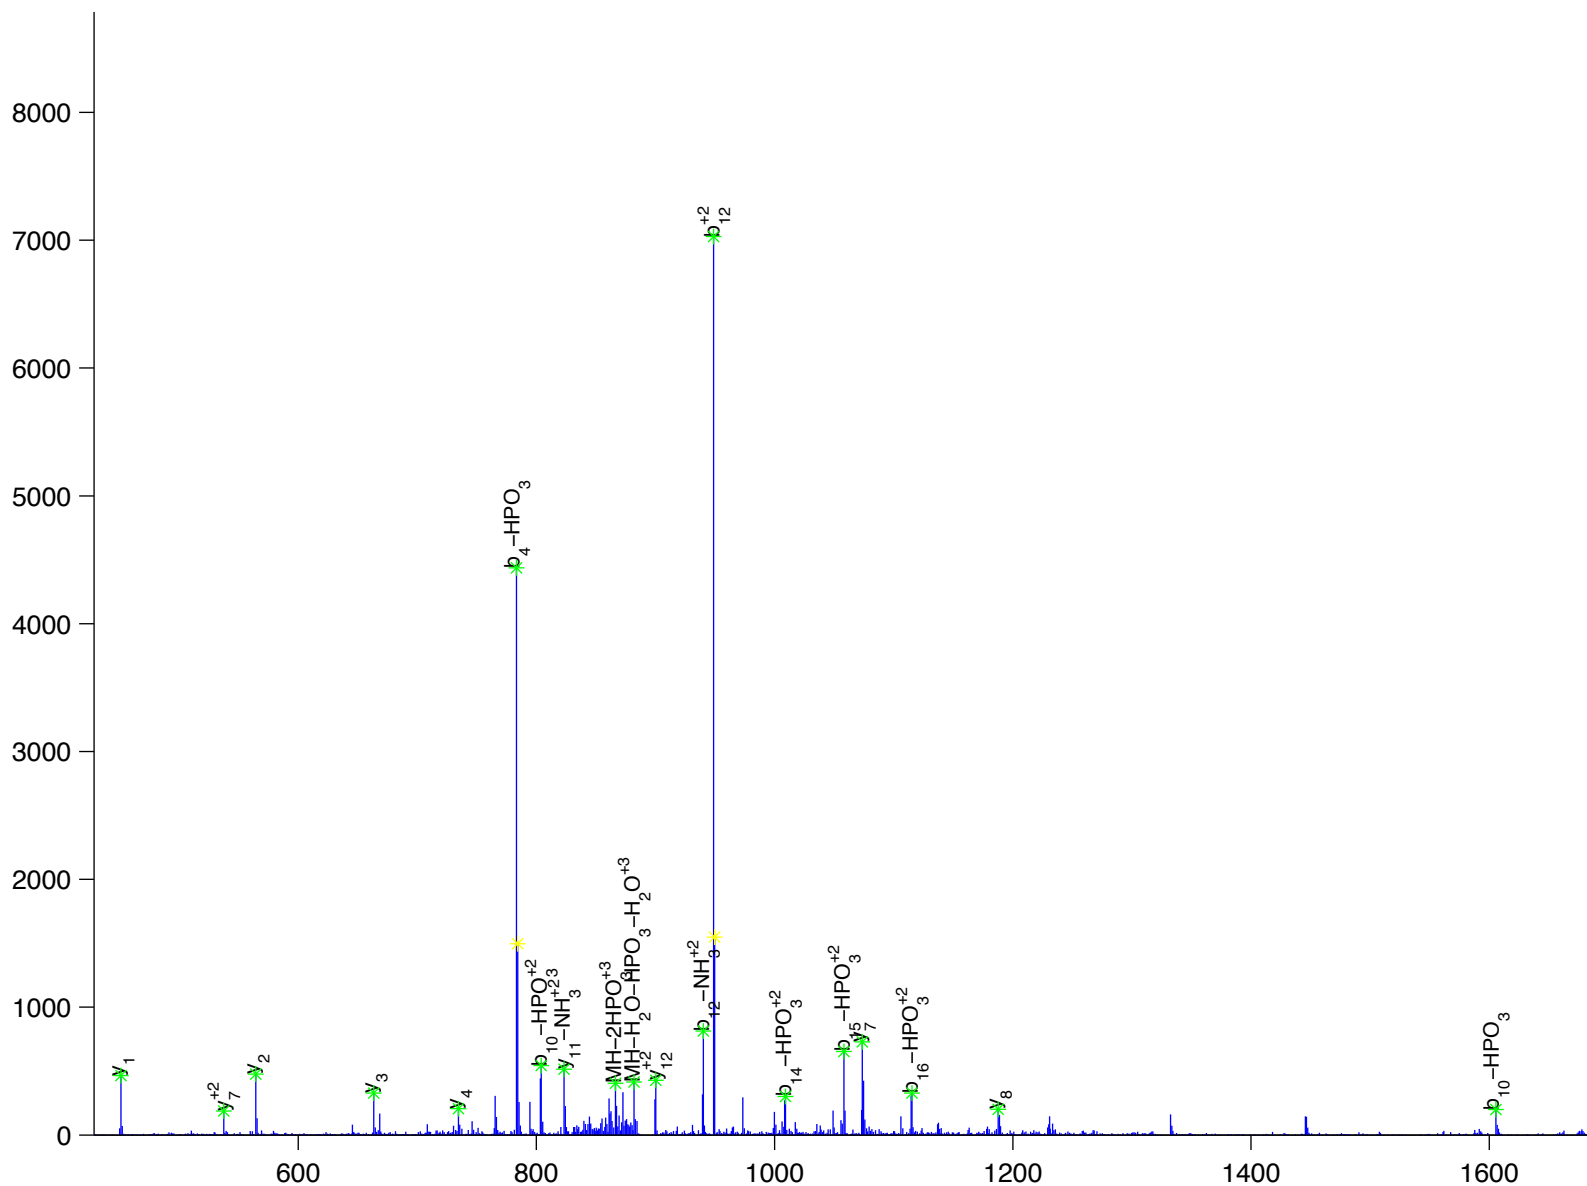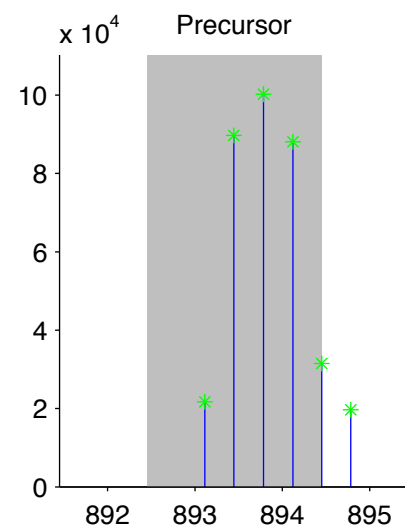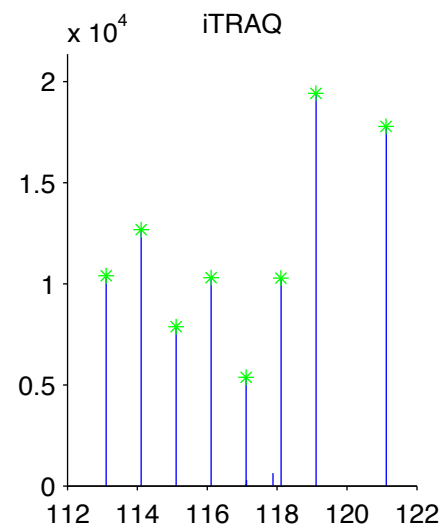



V L E D D P E A T y T T S G G K

Eph receptor A2

Charge State: +3

Scan Number: 5231

File Name: 091130ptp1blivers\_hfd\_basal2.raw

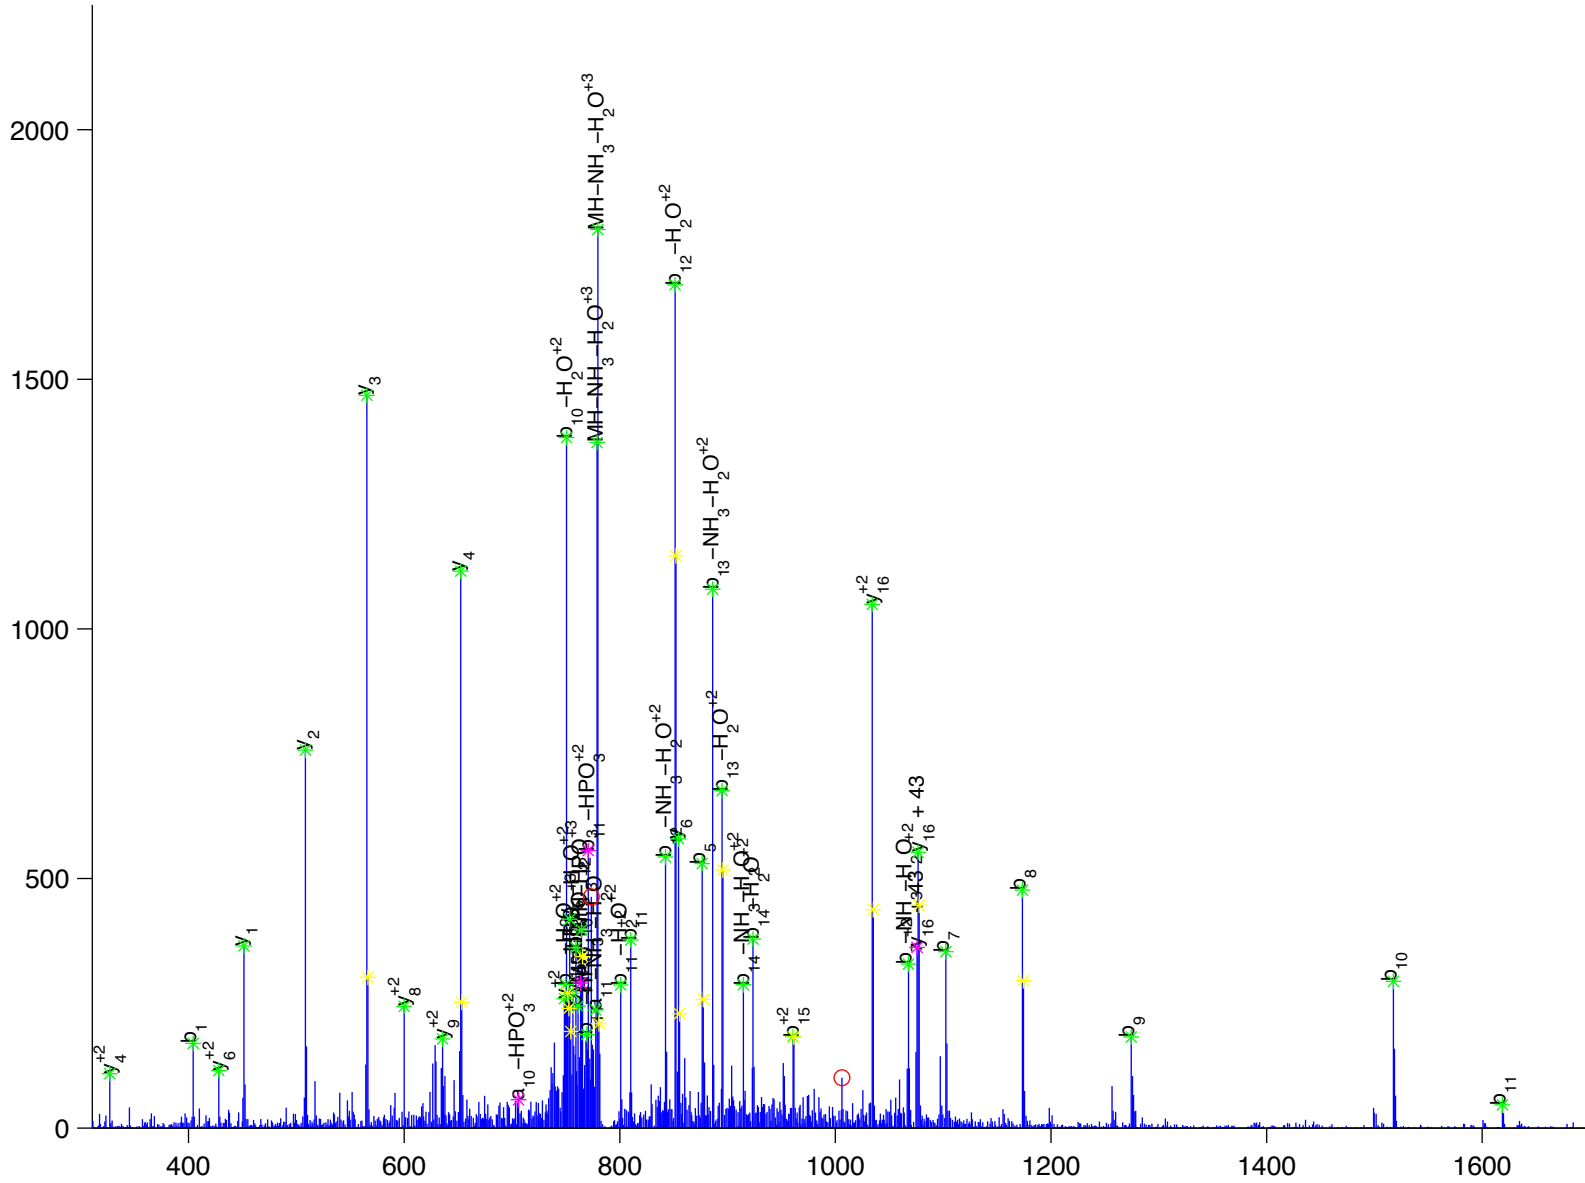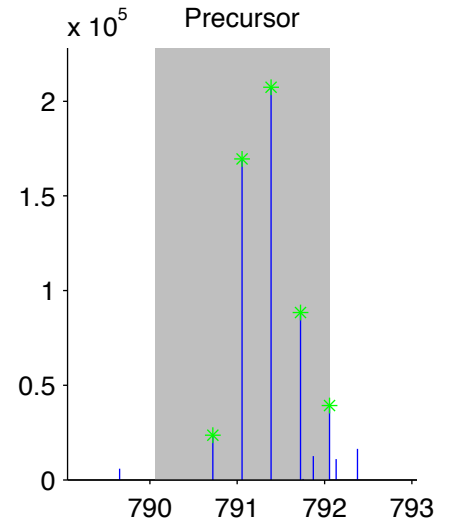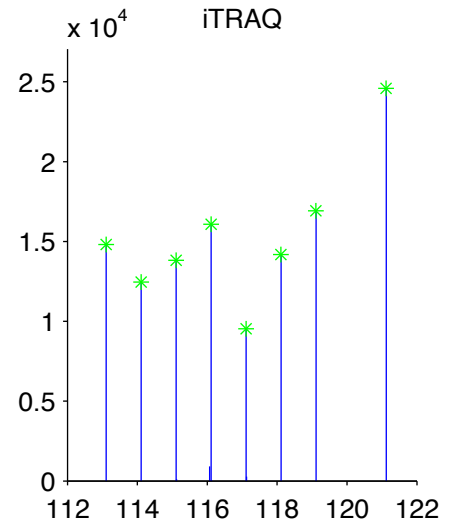

F L E E N S S D P T y T S S L G G K

Eph receptor B4

Charge State: +3

Scan Number: 6436

File Name: 091130ptp1blivers\_hfd\_basal2.raw

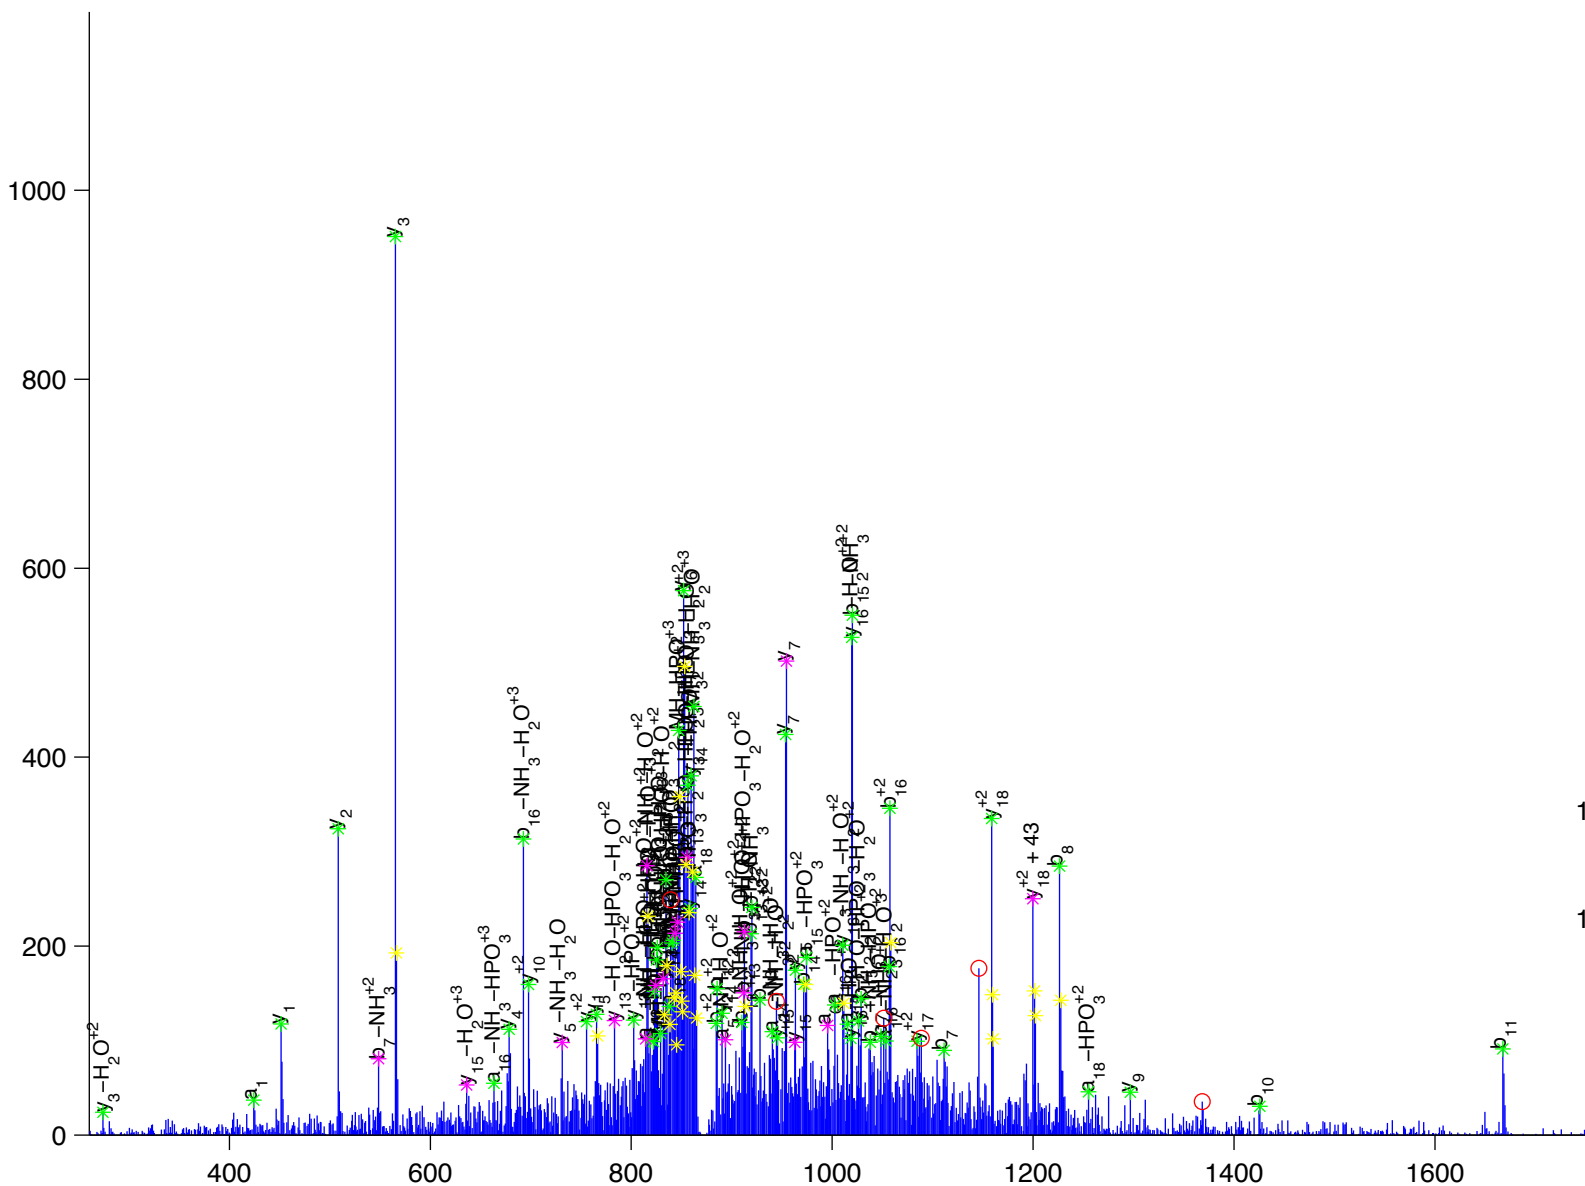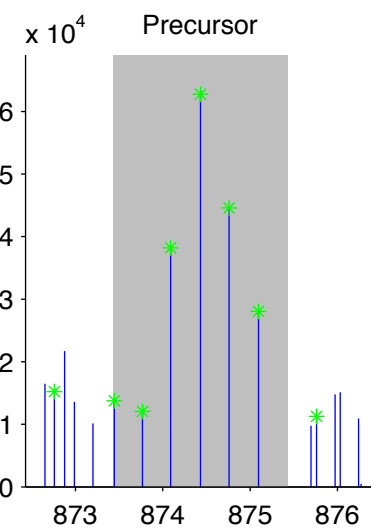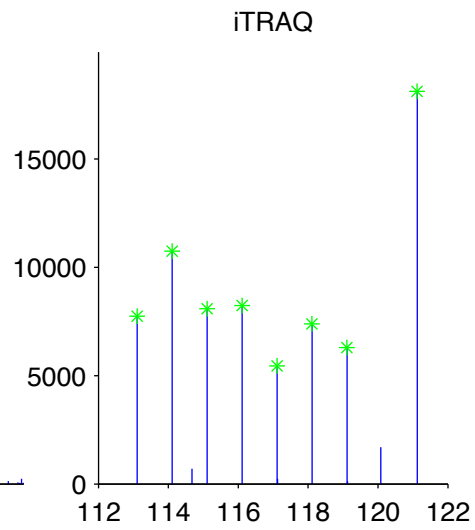

G  
 [ P ]  
 [ T ]  
 [ A ]  
 [ E ]  
 [ N ]  
 [ A ]  
 [ E ]  
 y  
 [ L ]  
 [ R ]

epidermal growth factor receptor isoform 1

Charge State: +3

Scan Number: 4290

File Name: 091130ptp1blivers\_hfd\_basal2.raw

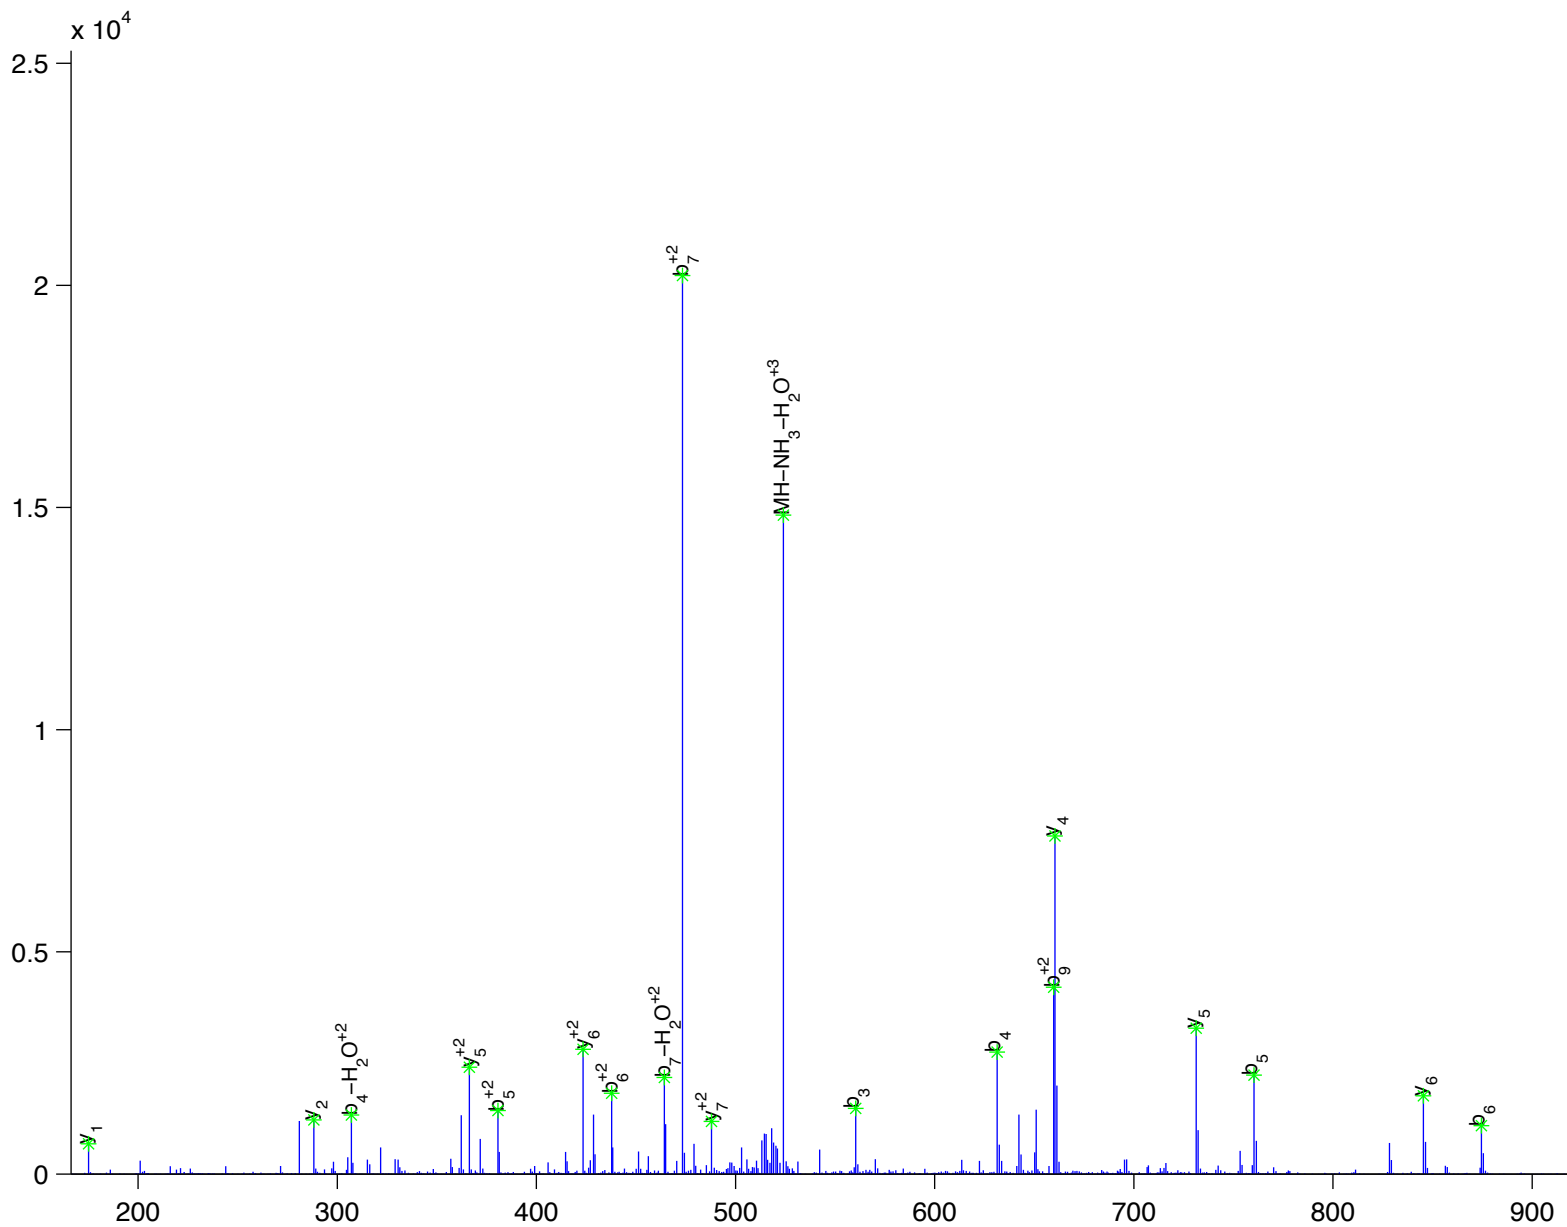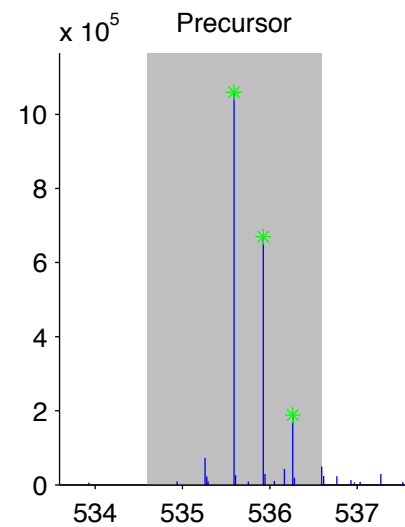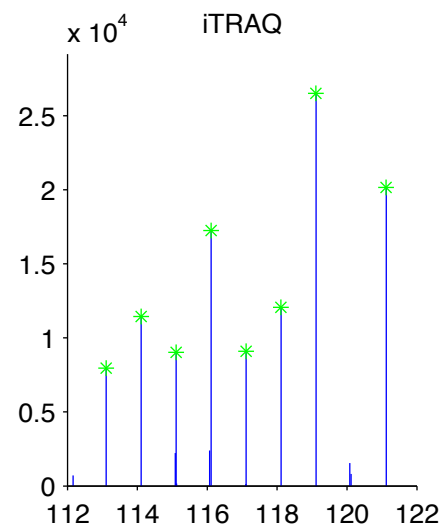



Y[S]S[D]P[T]G[A]V[T]E[D]N[I]D[D]A[F]L[P]V[P]E[y]V[N]Q[S]V[P]K

epidermal growth factor receptor isoform 1

Charge State: +4

Scan Number: 5673

File Name: 100908ptp1blivers\_ncHFD3\_basal.raw

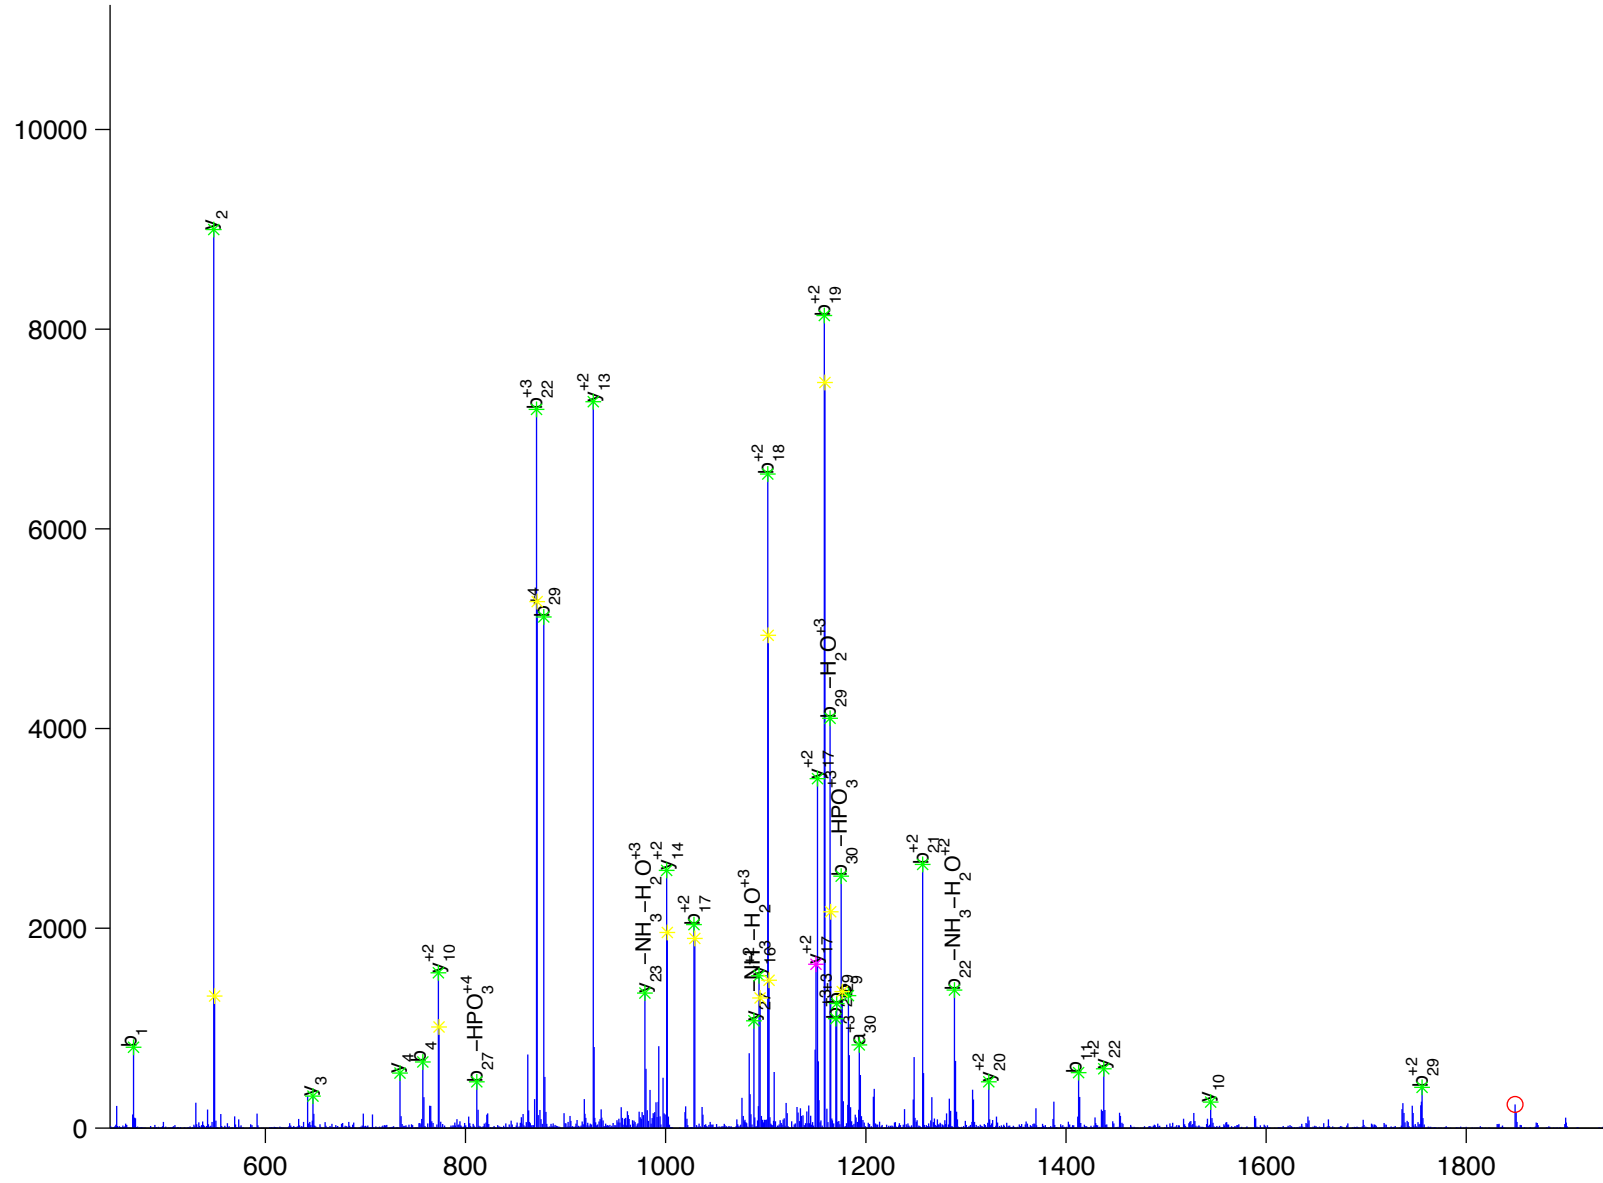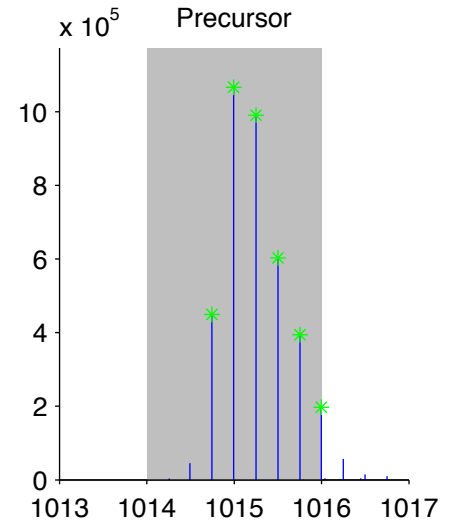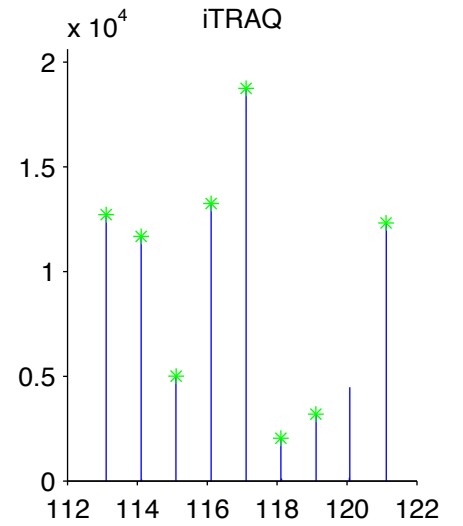

T [ E ] G [ D ] y [ L ] S [ Y ] R

ErbB2 interacting protein isoform 2

Charge State: +2

Scan Number: 4282

File Name: HJ072909\_HFD\_E1.raw

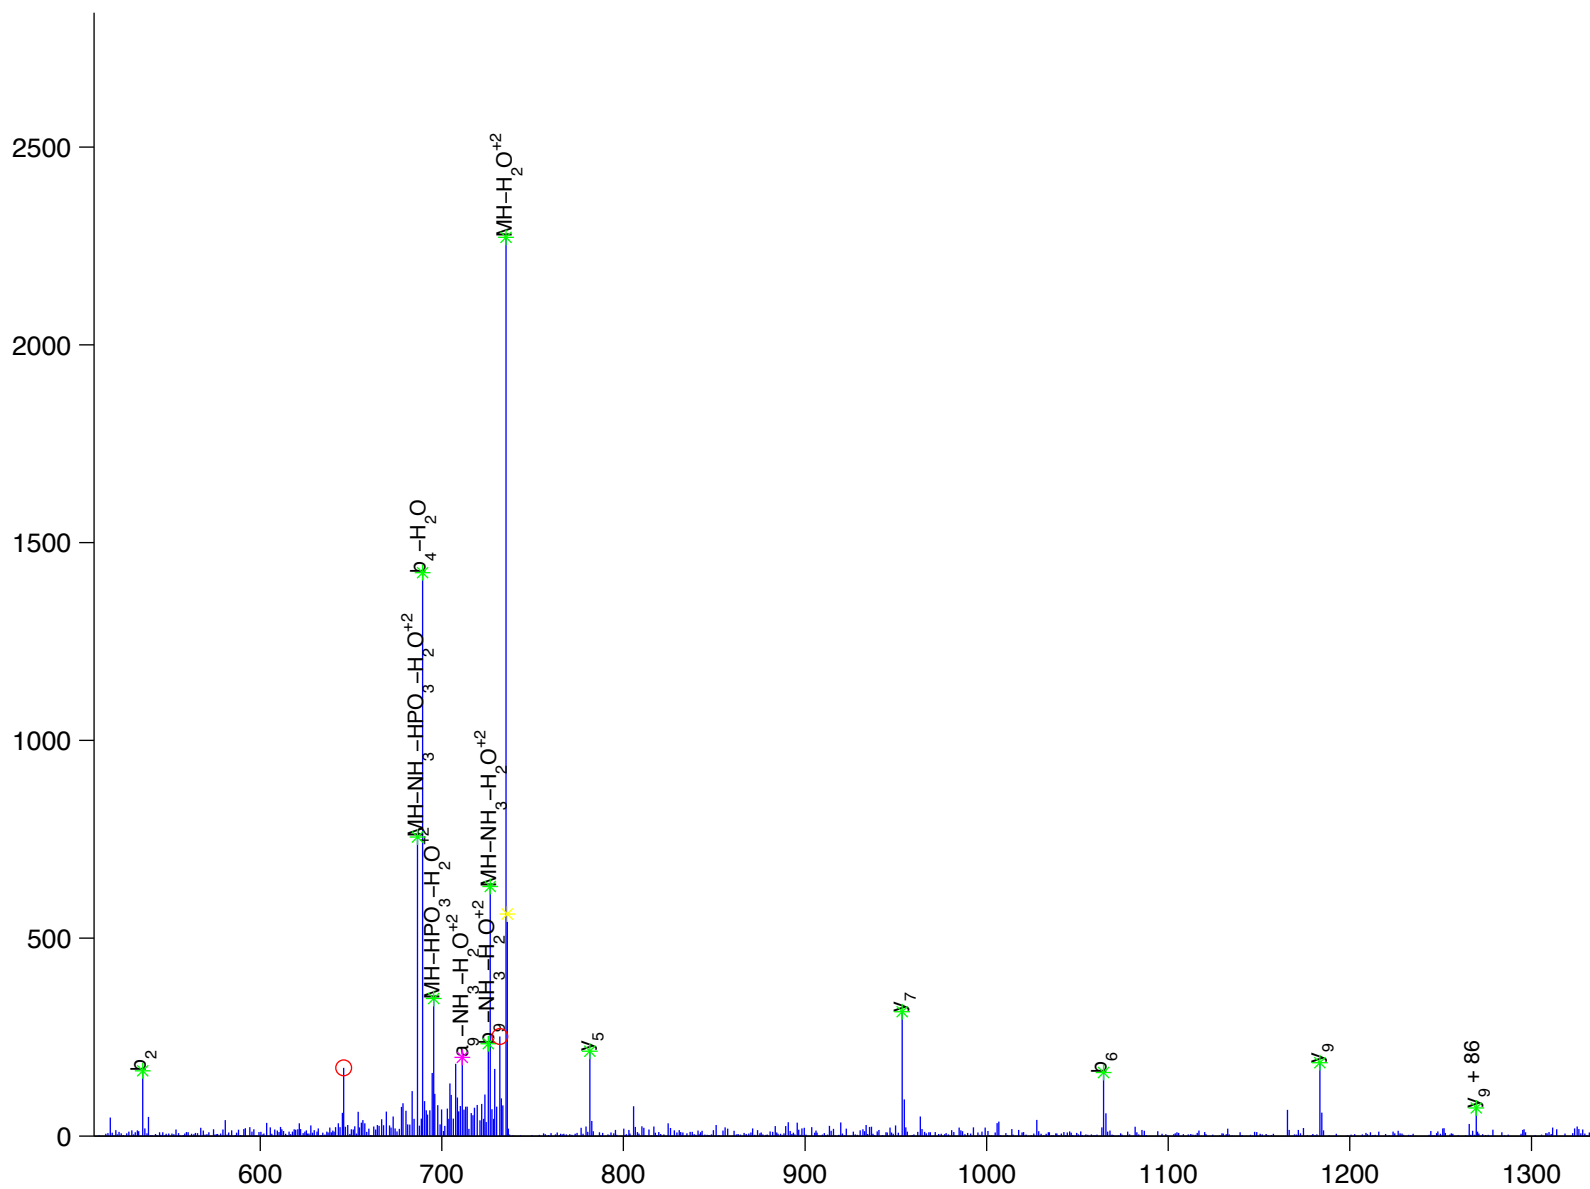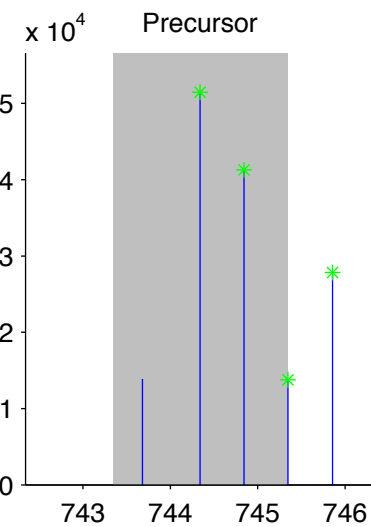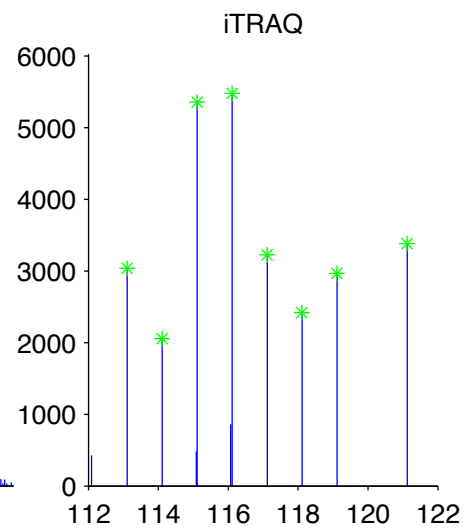

R T E G D y L S y R

ErbB2 interacting protein isoform 2

Charge State: +3

Scan Number: 4971

File Name: 100908ptp1blivers\_ncHFD3\_basal.raw

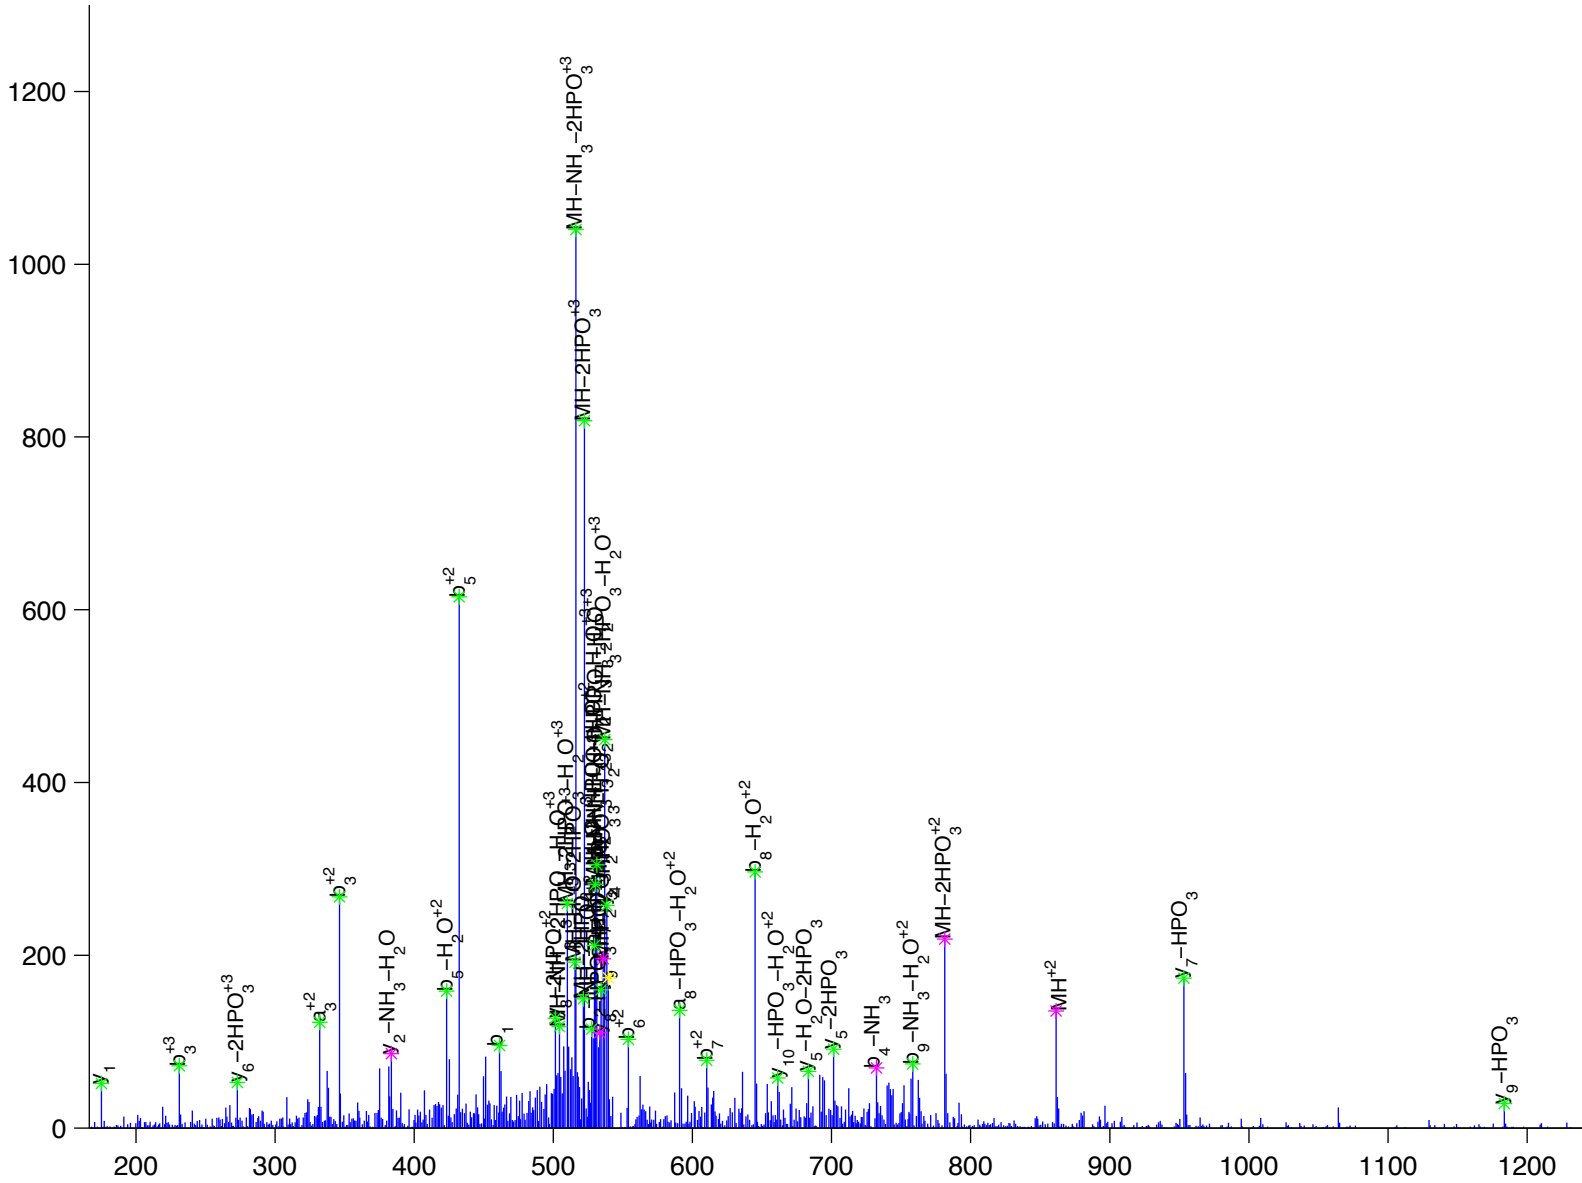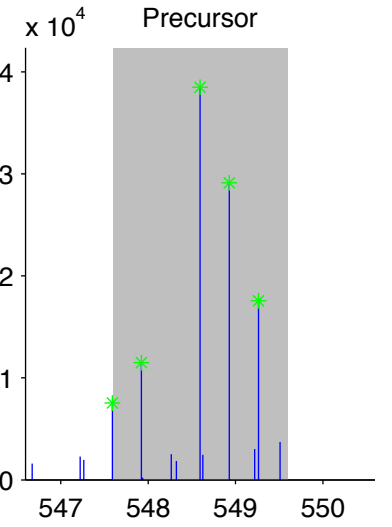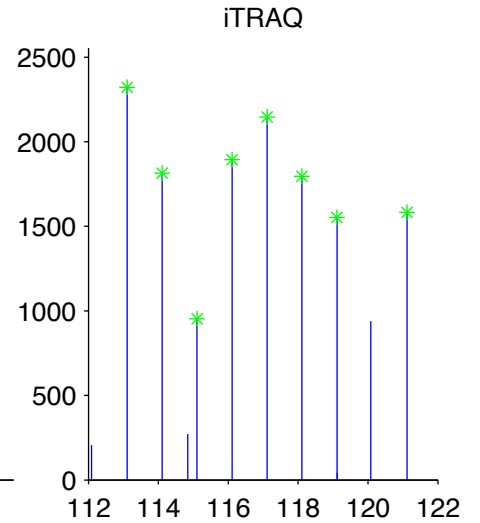

E[V]S[T]y[I]K

eukaryotic translation elongation factor 1 alpha 1

Charge State: +3

Scan Number: 5411

File Name: 090807ptp1blivers\_M\_HFD\_basal.raw

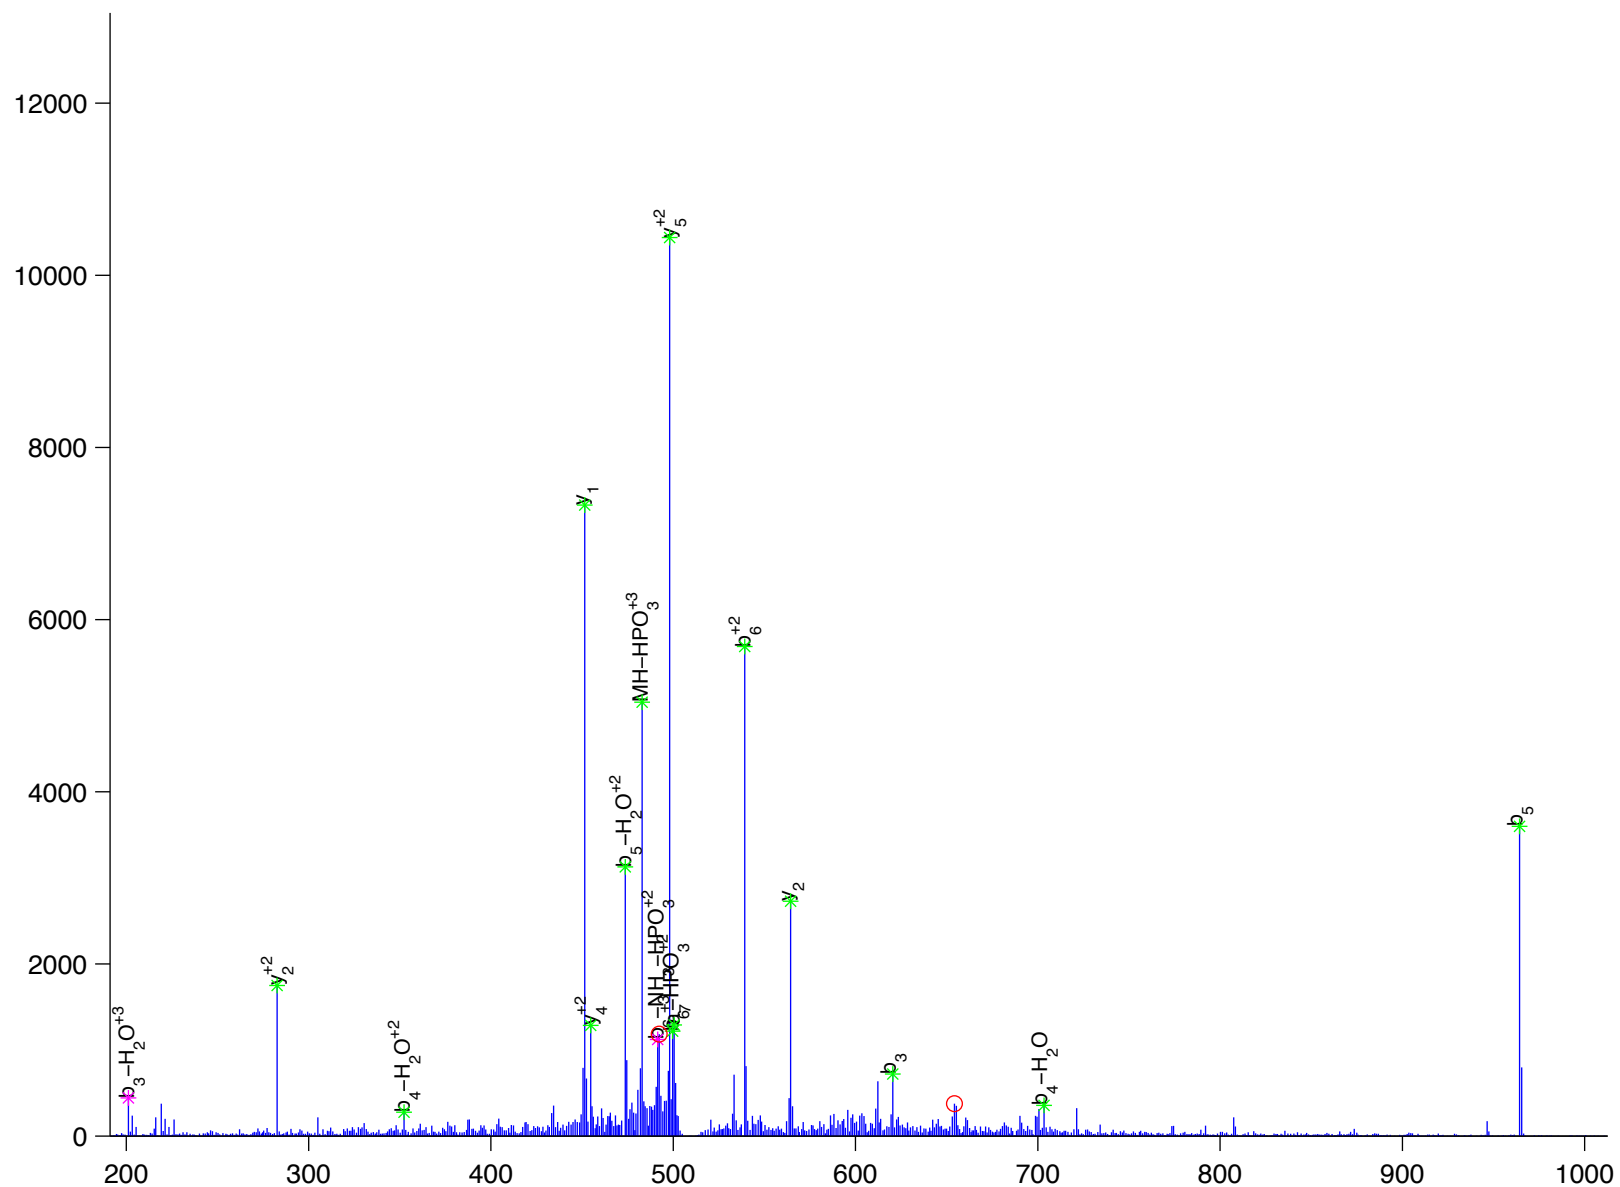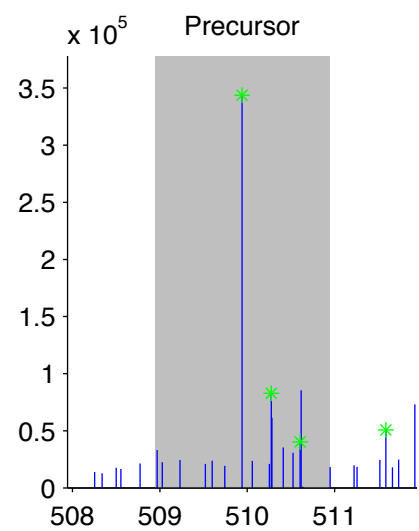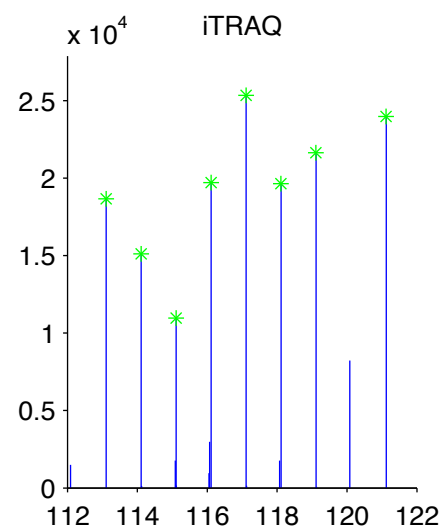



E [ H ] A [ L ] L [ A ] y [ T ] L [ G ] V [ K ]

eukaryotic translation elongation factor 1 alpha 2

Charge State: +3

Scan Number: 2287

File Name: HJ072909\_HFD\_E1\_2.raw

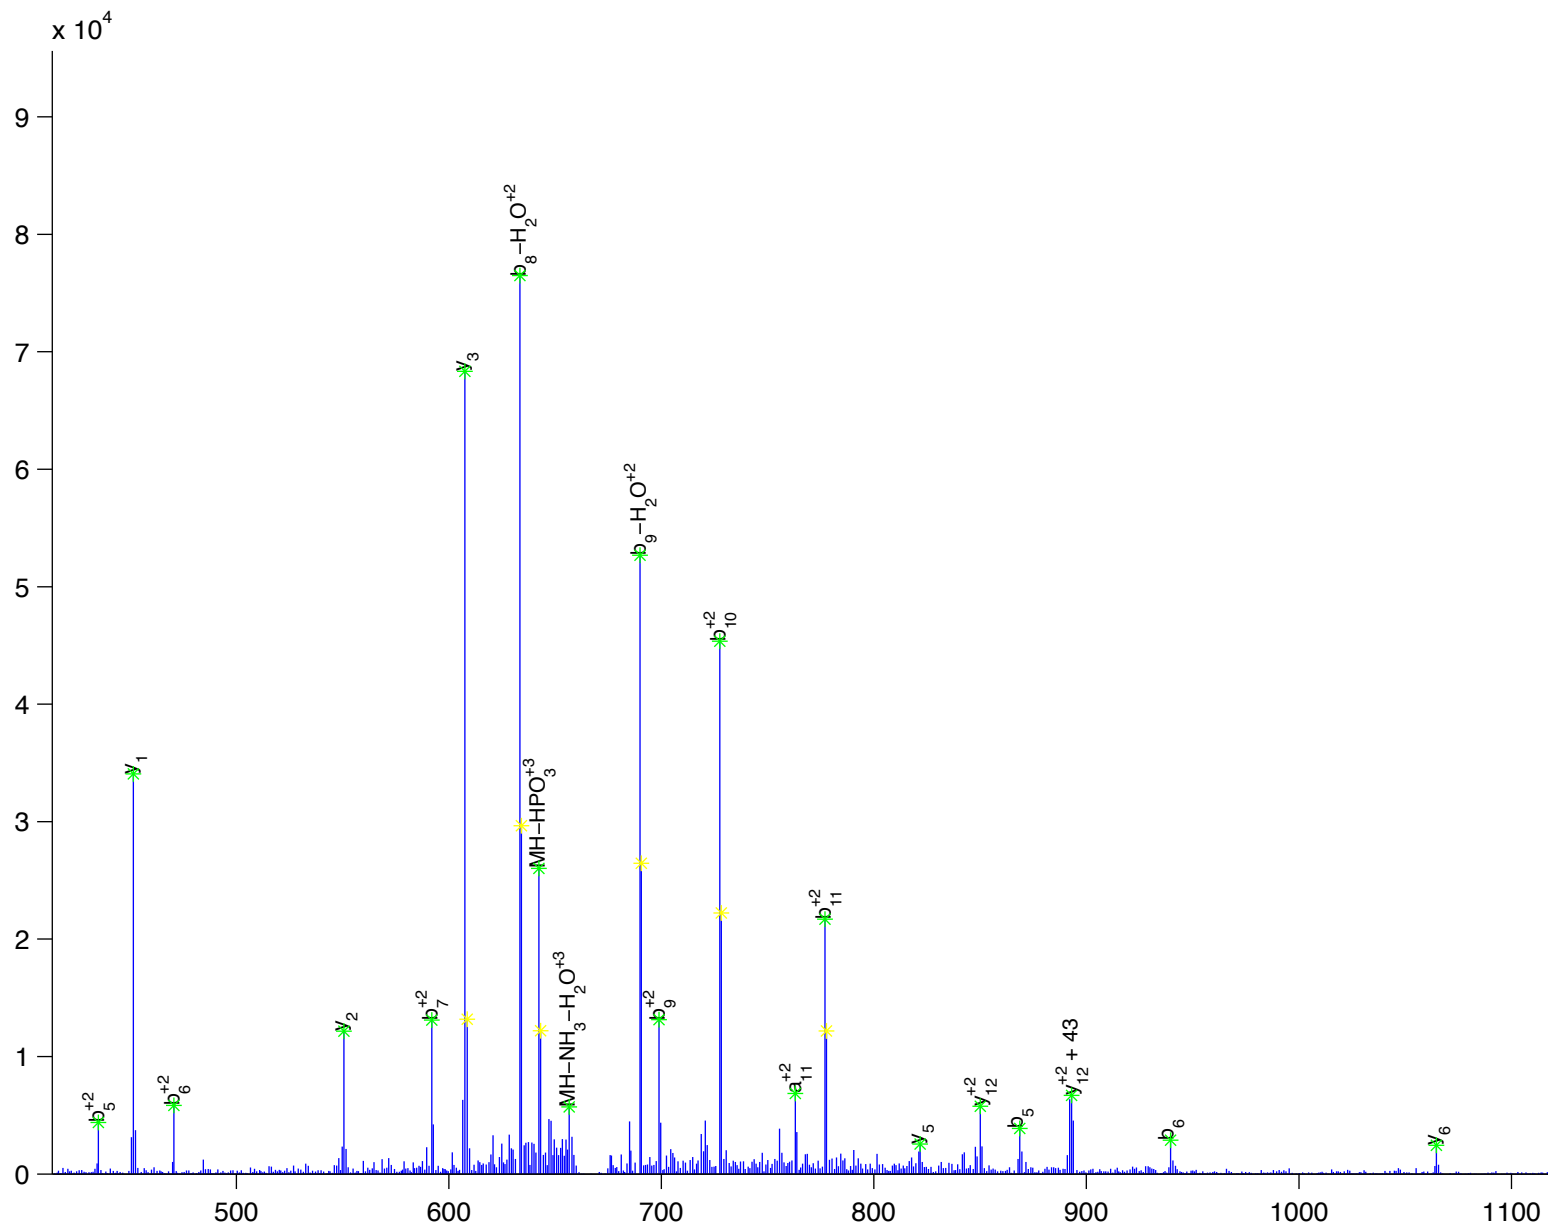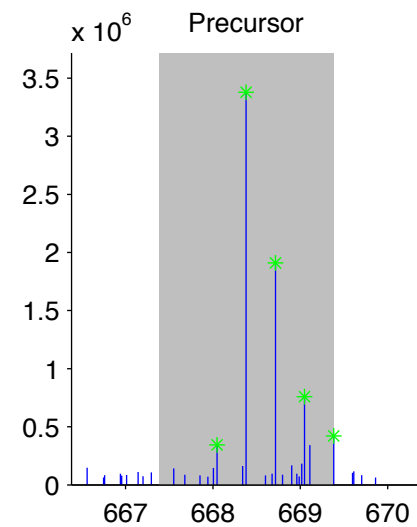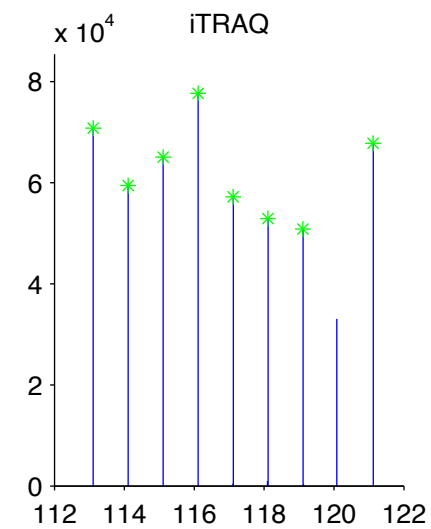

G [D] [D] [L] [L] [P] [A] [G] [T] [E] [D] y [I] [H] [I] R

eukaryotic translation initiation factor 1B

Charge State: +3

Scan Number: 4631

File Name: 100827ptp1blivers\_ncHFD\_basal.raw

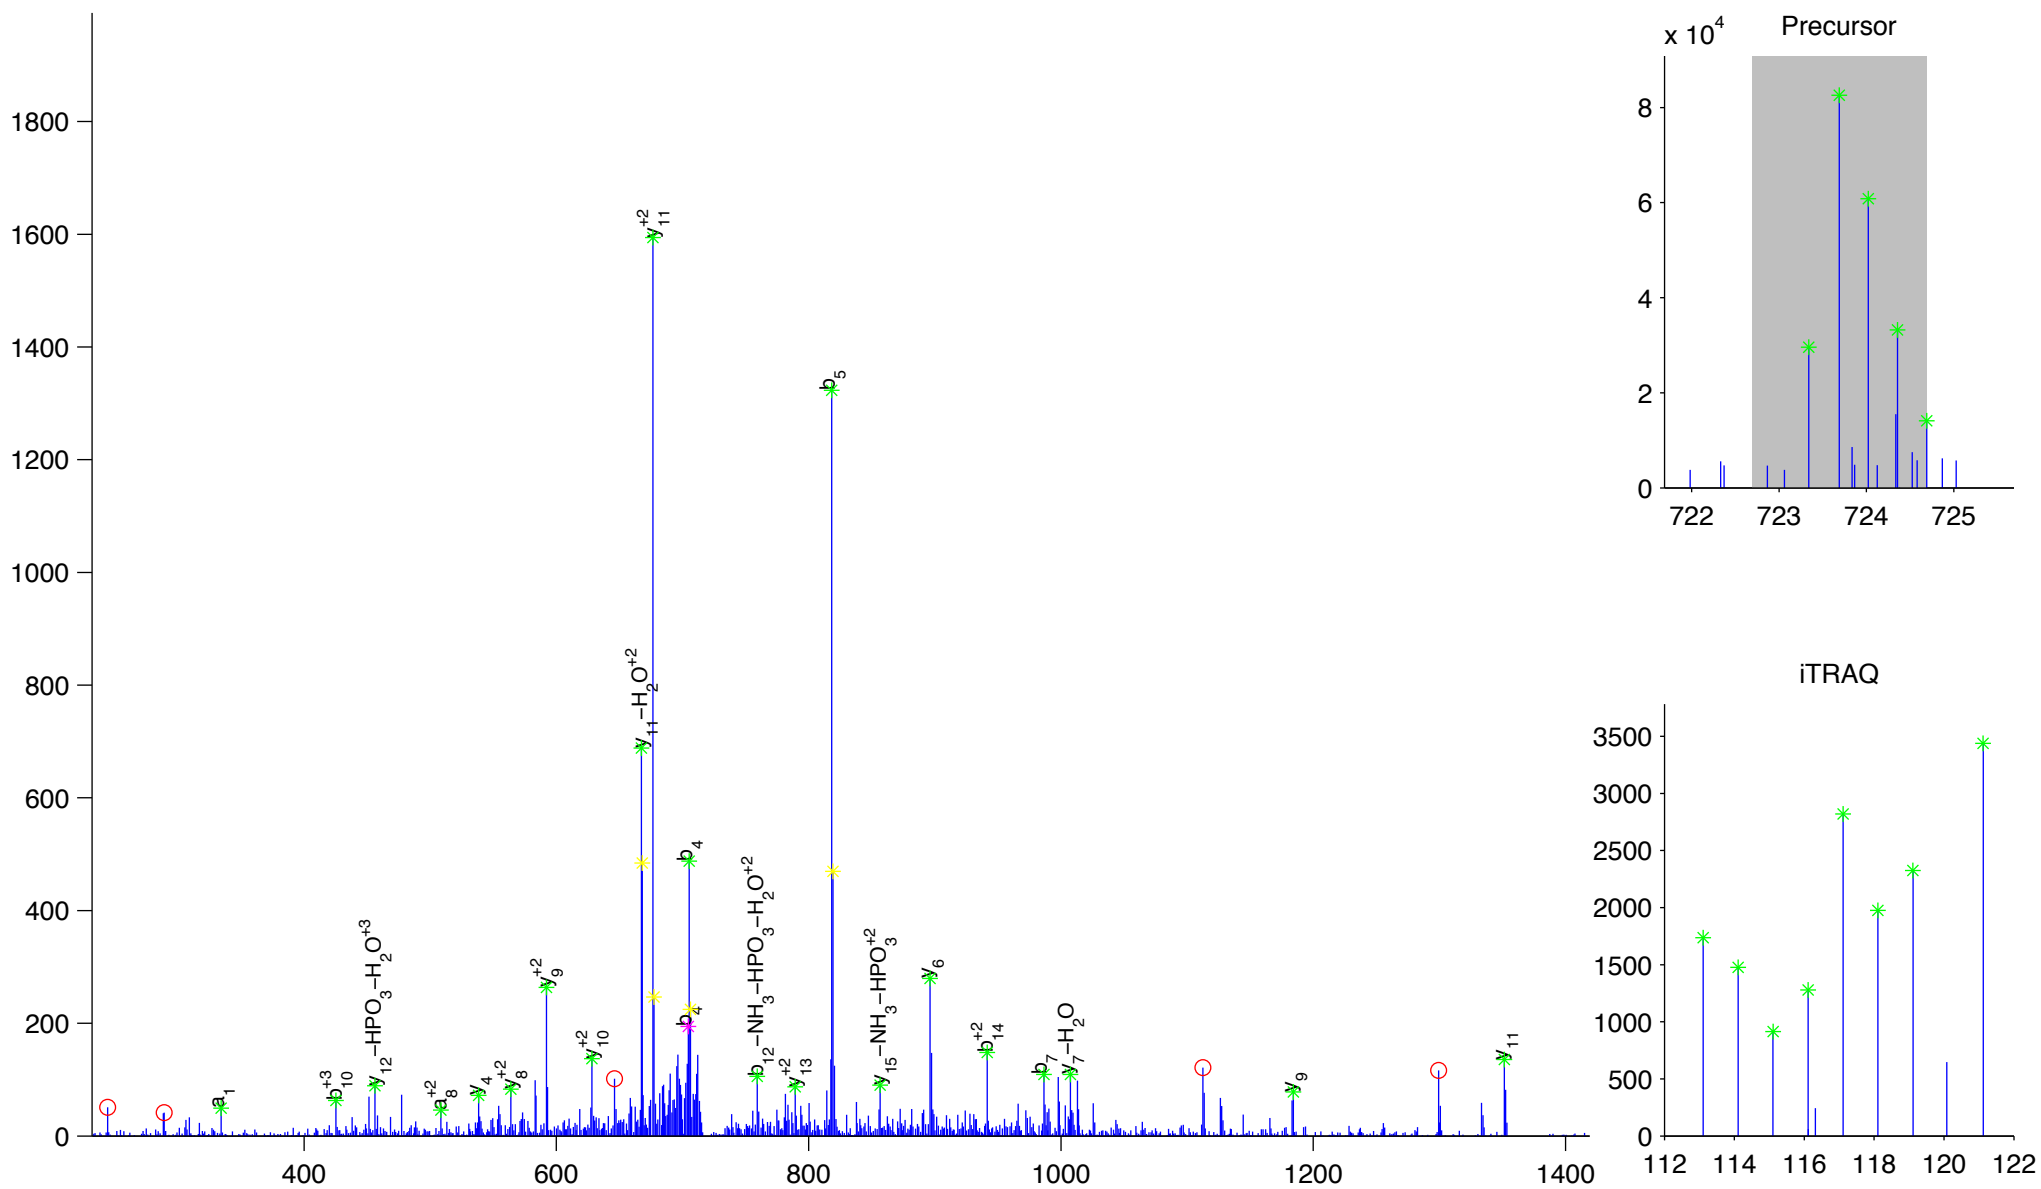

V I y S Q P S T R

F11 receptor  
 Charge State: +2  
 Scan Number: 4204  
 File Name: 091130ptp1blivers\_hfd\_basal2.raw

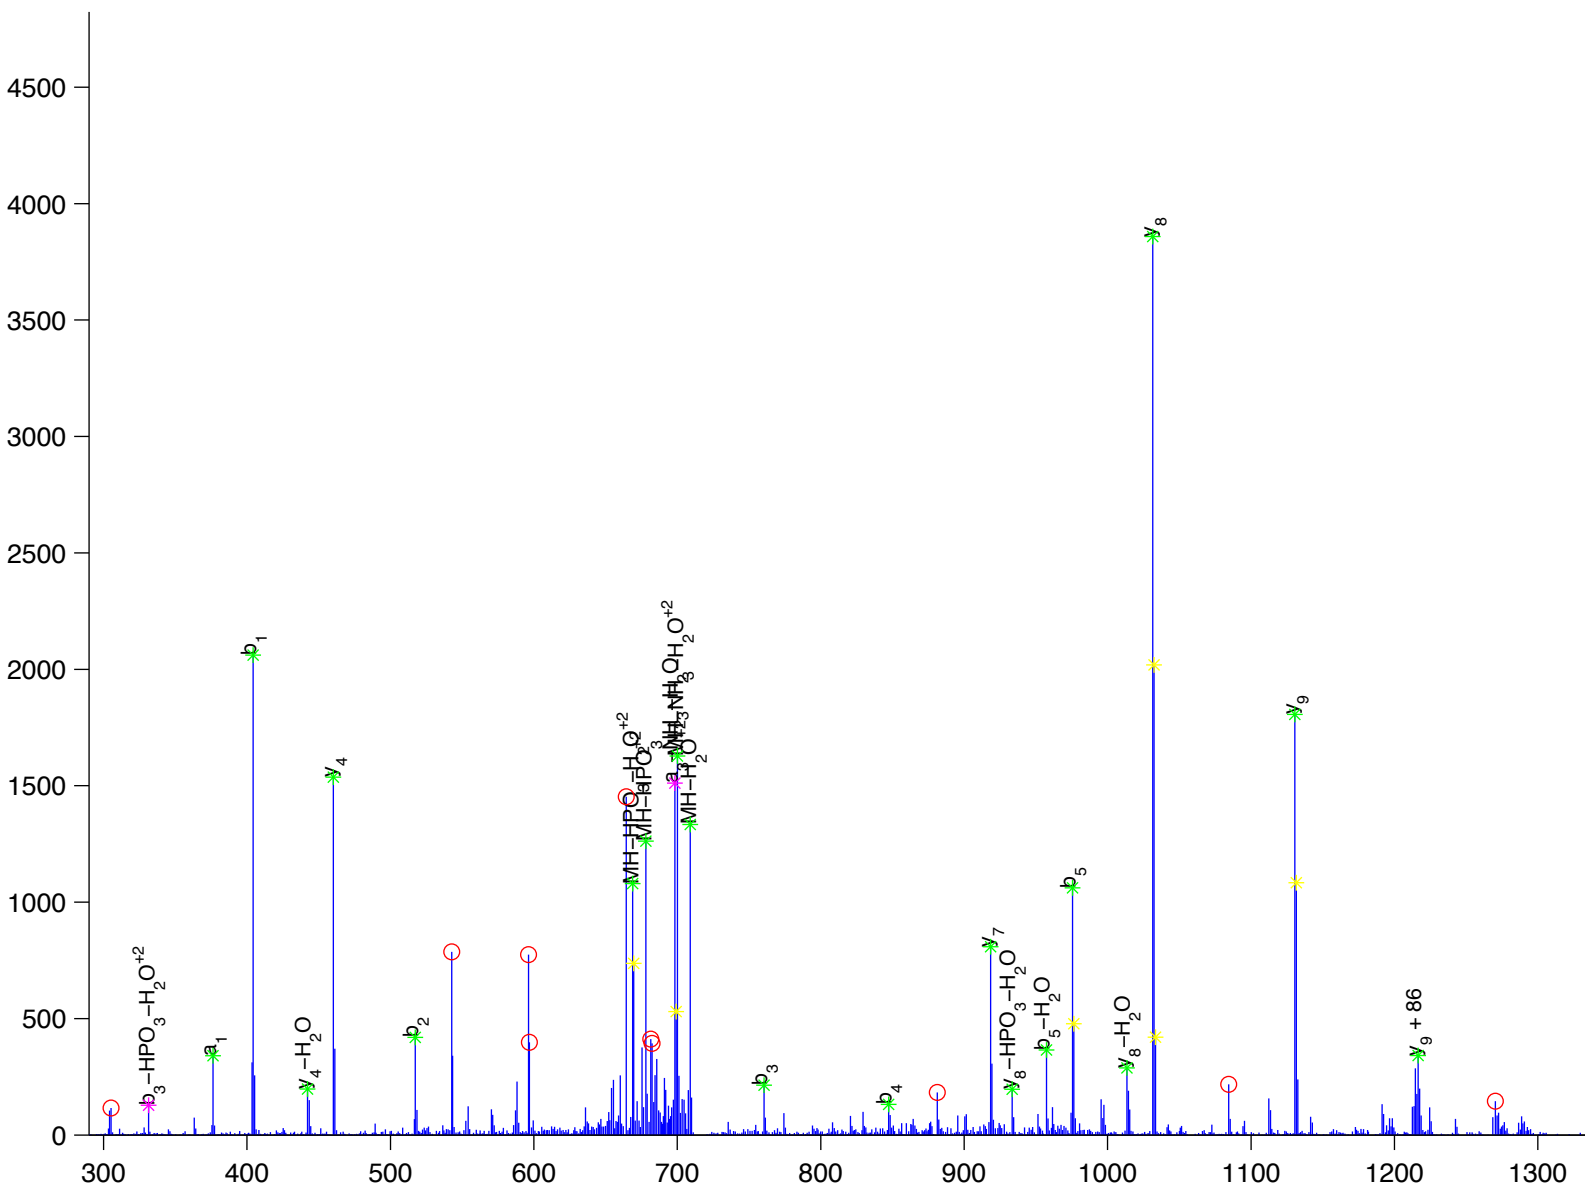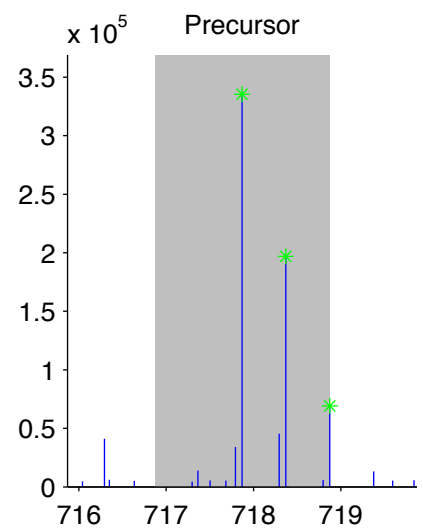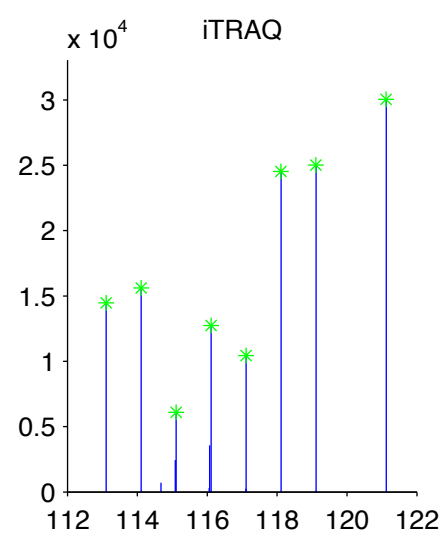

V [ A ] [ E ] [ V ] [ L ] [ A ] [ G ] [ E ] [ G ] [ H ] [ L ] [ y ] [ S ] [ R ]

fatty acid synthase

Charge State: +3

Scan Number: 6554

File Name: 091130ptp1blivers\_hfd\_basal2.raw

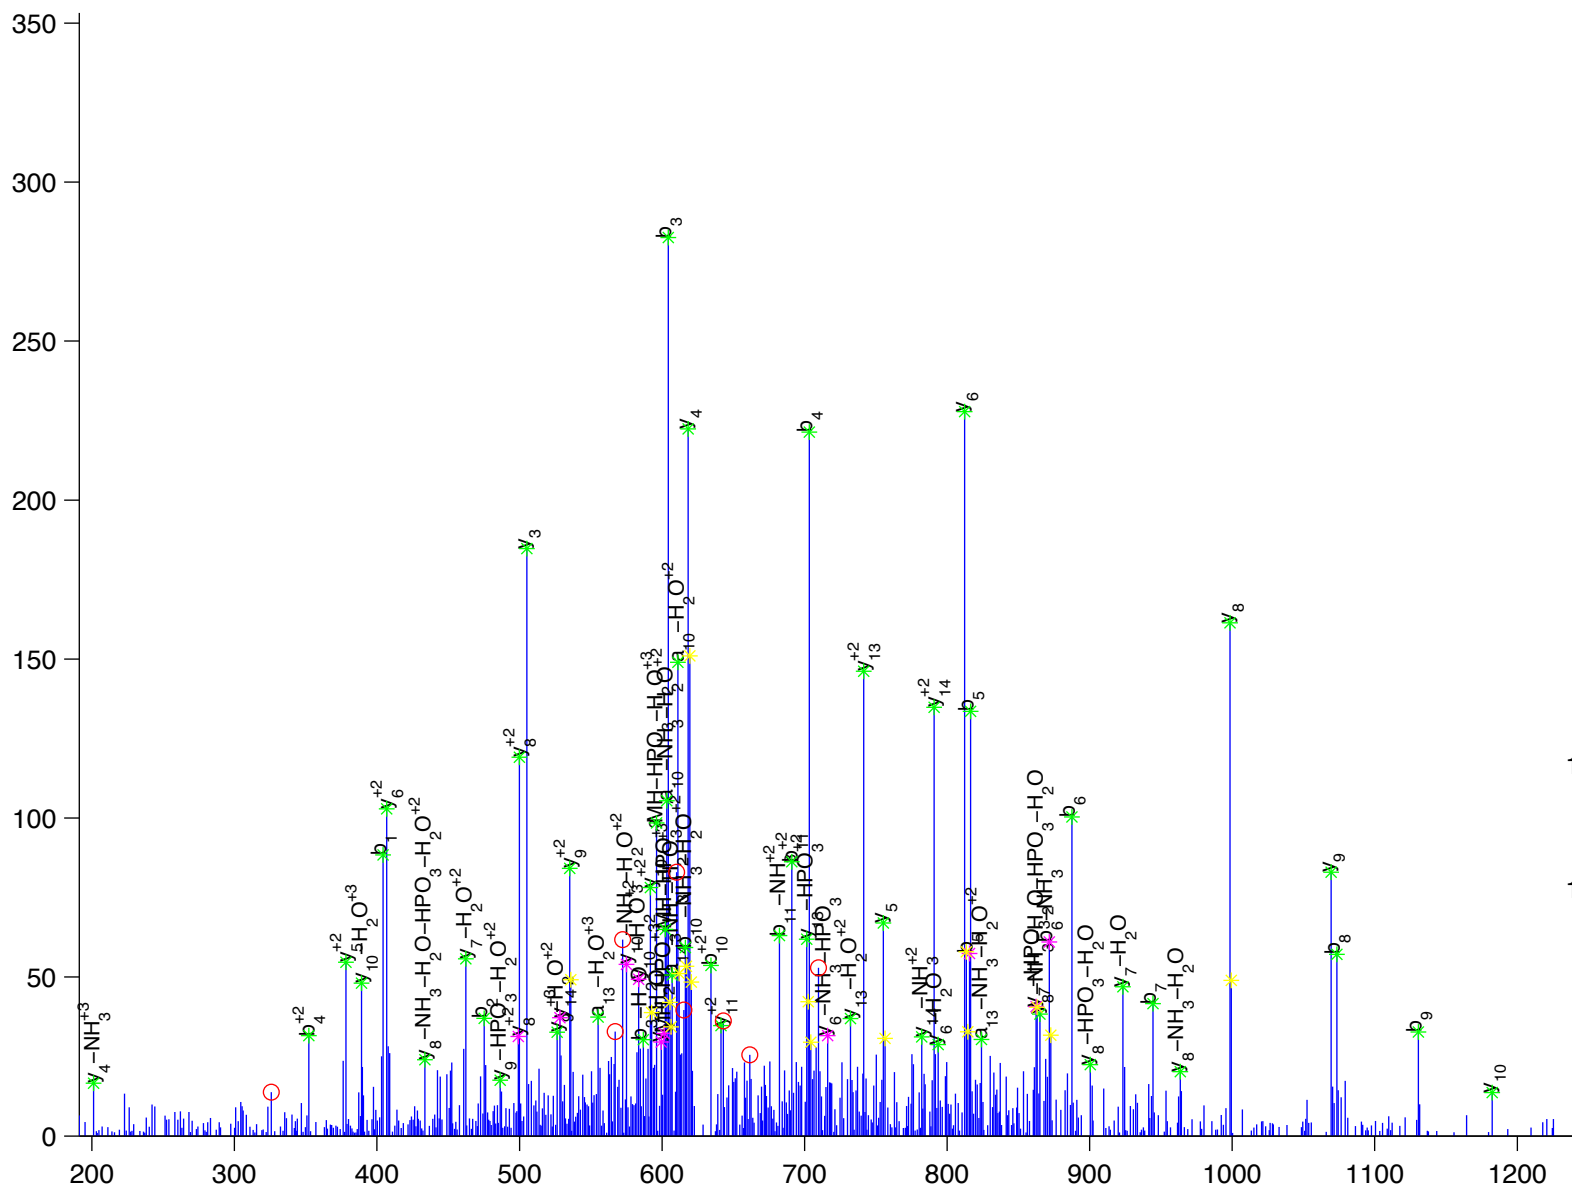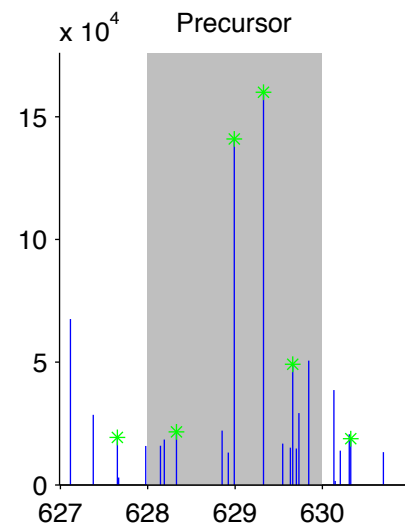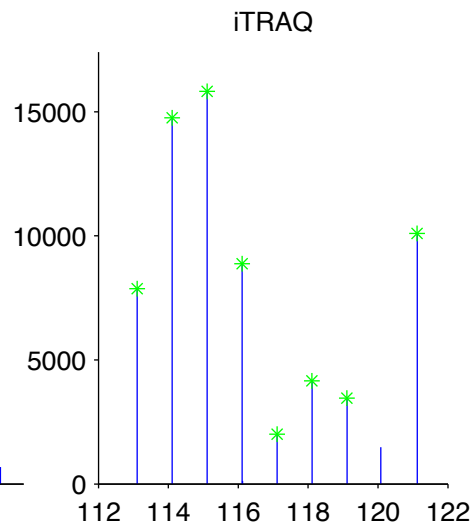

H [ P ] E [ A ] L [ D ] E [ E ] T [ E ] H [ D ] y [ Q ] N [ H ]

Fc receptor, IgG, low affinity IIb isoform 2

Charge State: +4

Scan Number: 5704

File Name: 100908ptp1blivers\_ncHFD3\_basal.raw

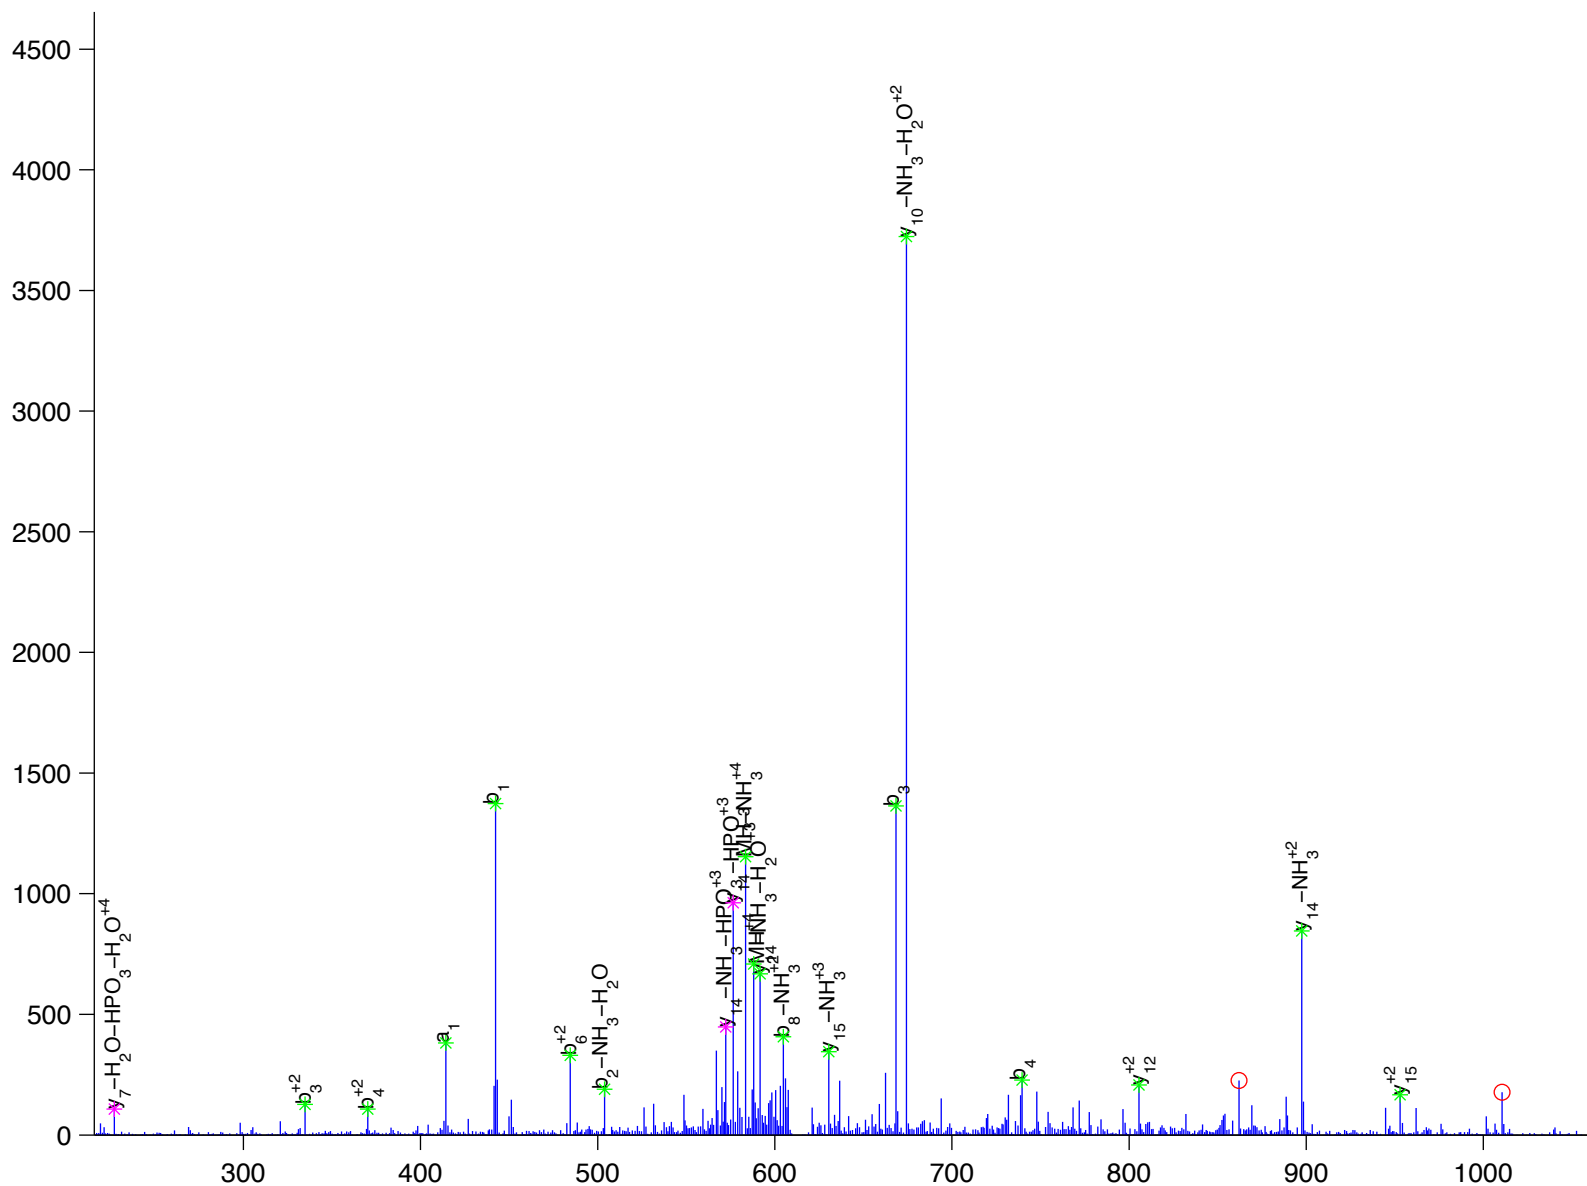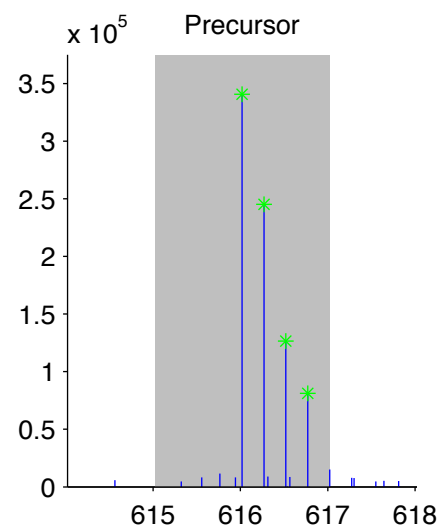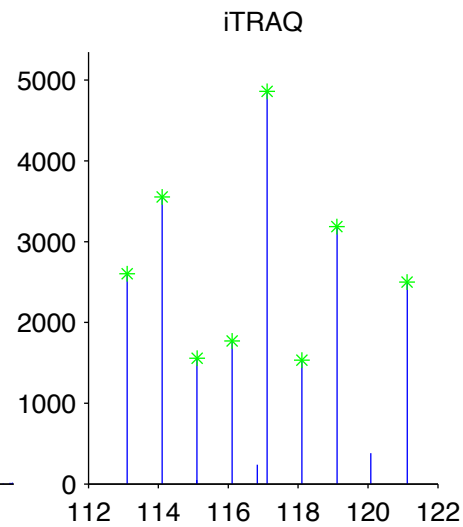

Q [ E ] [ D ] [ G ] [ G ] [ V ] [ y ] [ S ] [ S ] [ S ] [ G ] [ L ] K

fer (fms/fps related) protein kinase, testis specific 2 isoform a

Charge State: +3

Scan Number: 4160

File Name: 091130ptp1blivers\_hfd\_basal2.raw

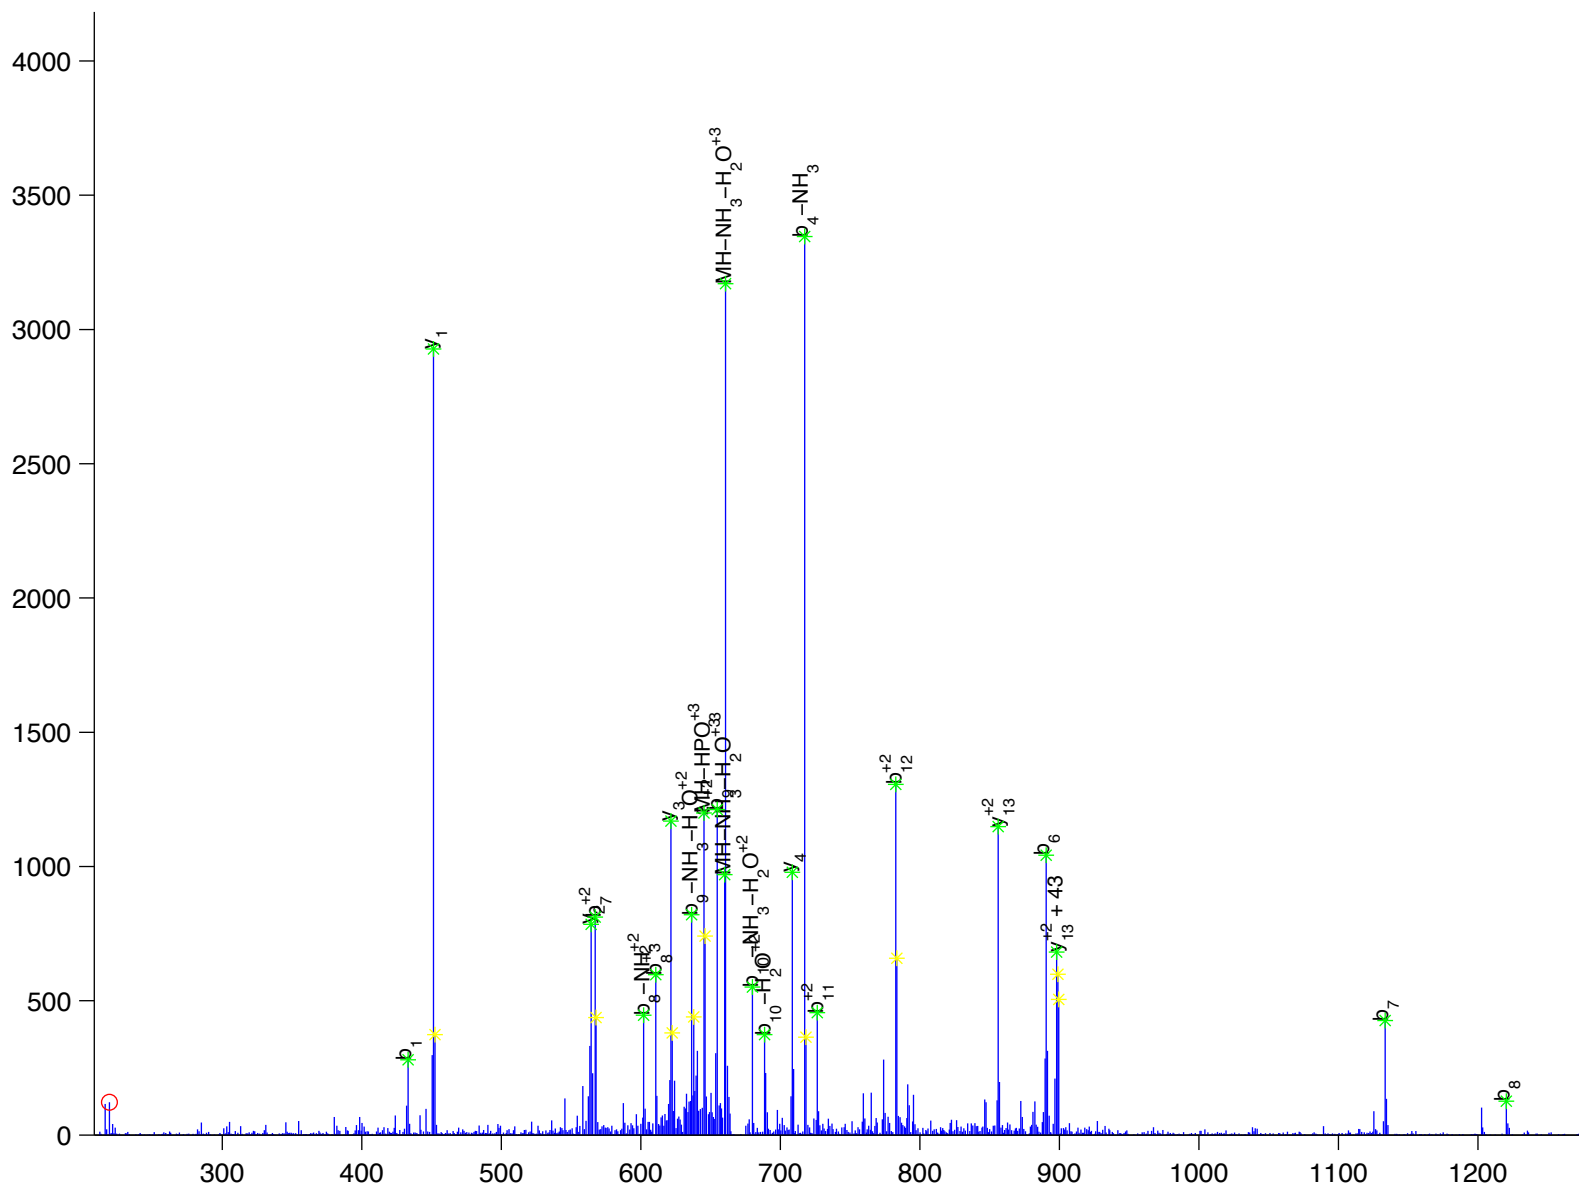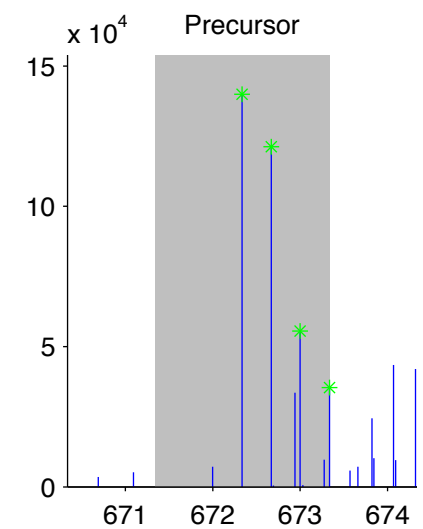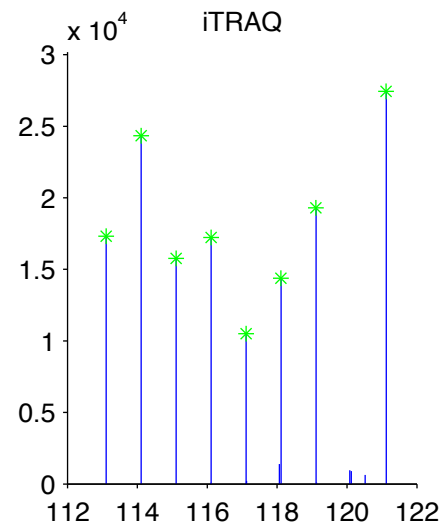

V[Q]E[N]D[G]K[E]P[P]P[V]V[N]y[E]E[D]A[R]

fer (fms/fps related) protein kinase, testis specific 2 isoform a

Charge State: +4

Scan Number: 4485

File Name: 091130ptp1blivers\_hfd\_basal2.raw

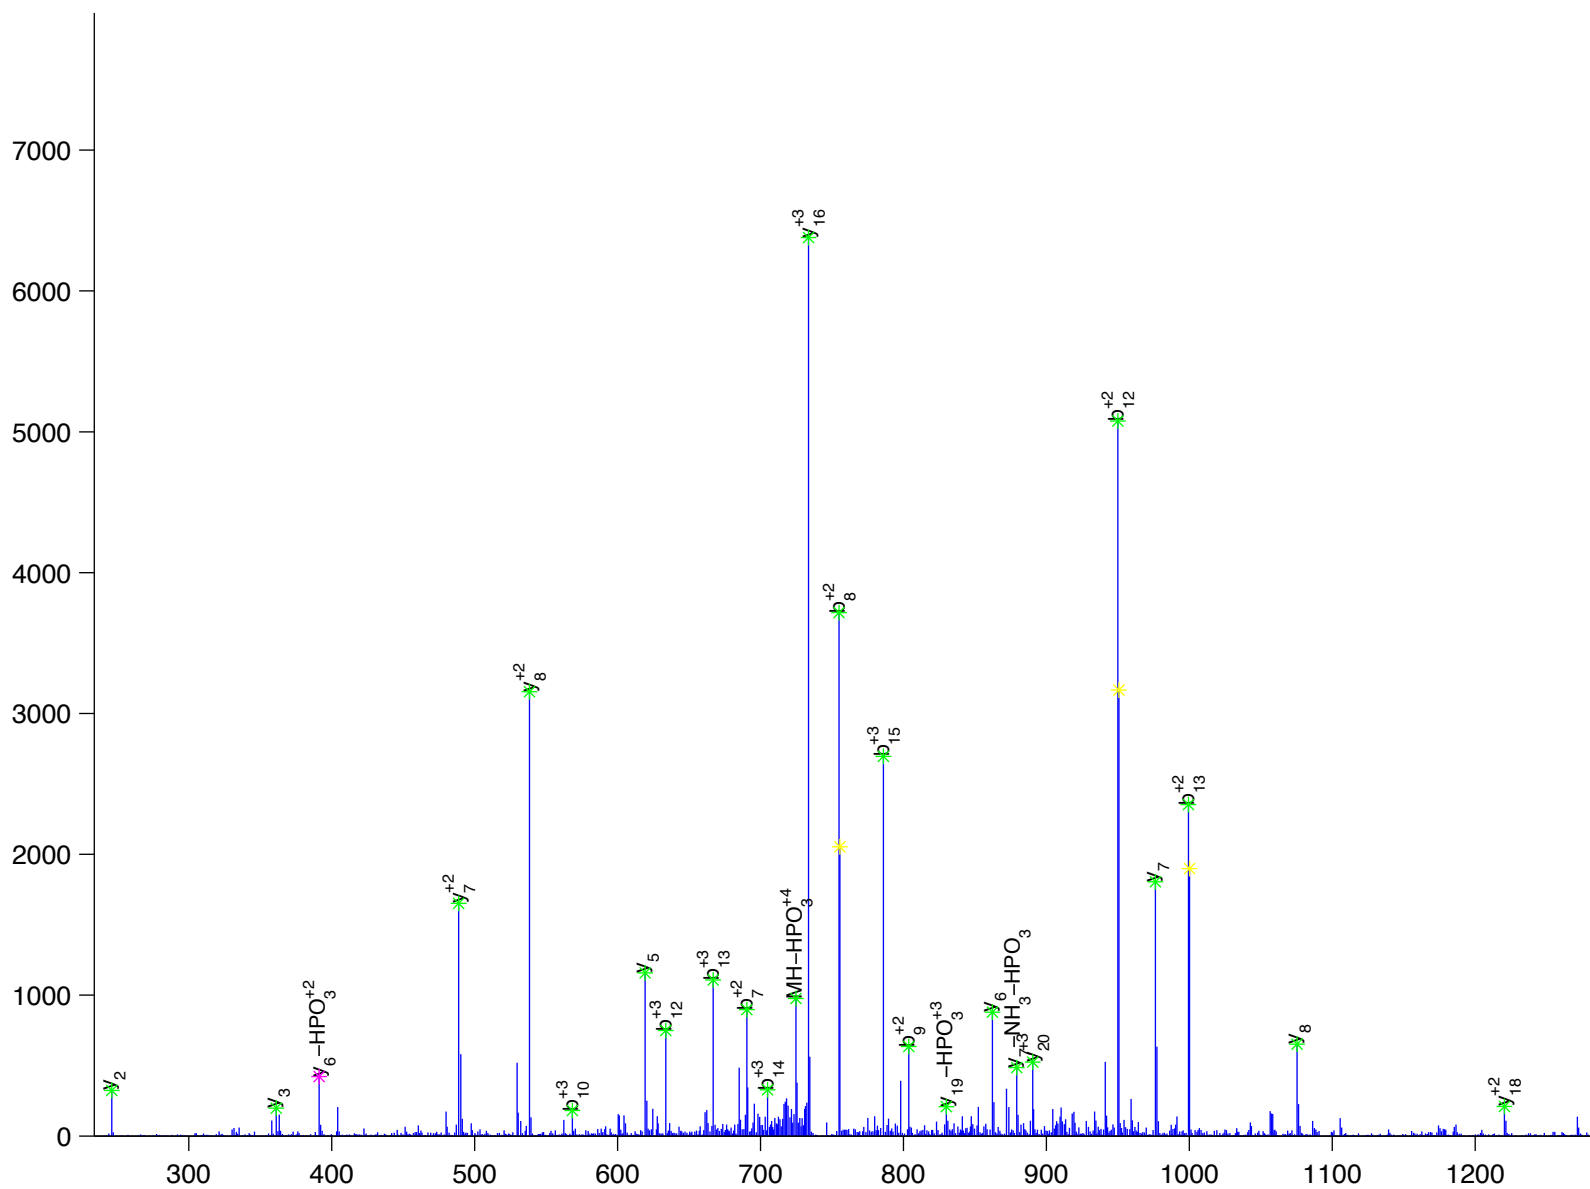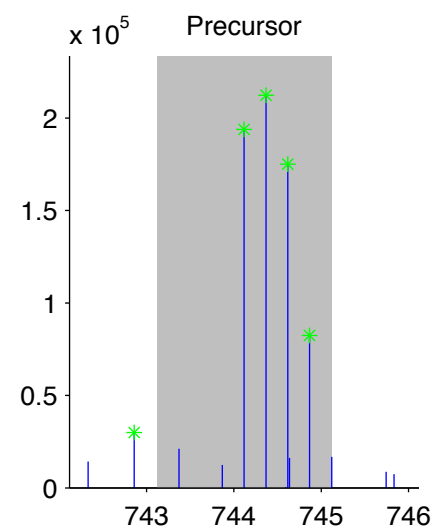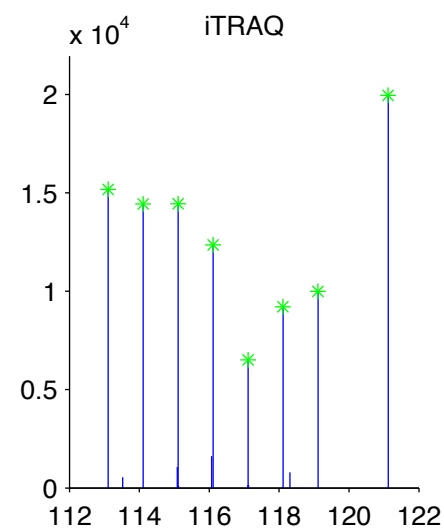

G [ N I Y S L N E G y A K ]

fructose bisphosphatase 1

Charge State: +3

Scan Number: 322

File Name: HJ072909\_HFD\_E1\_2.raw

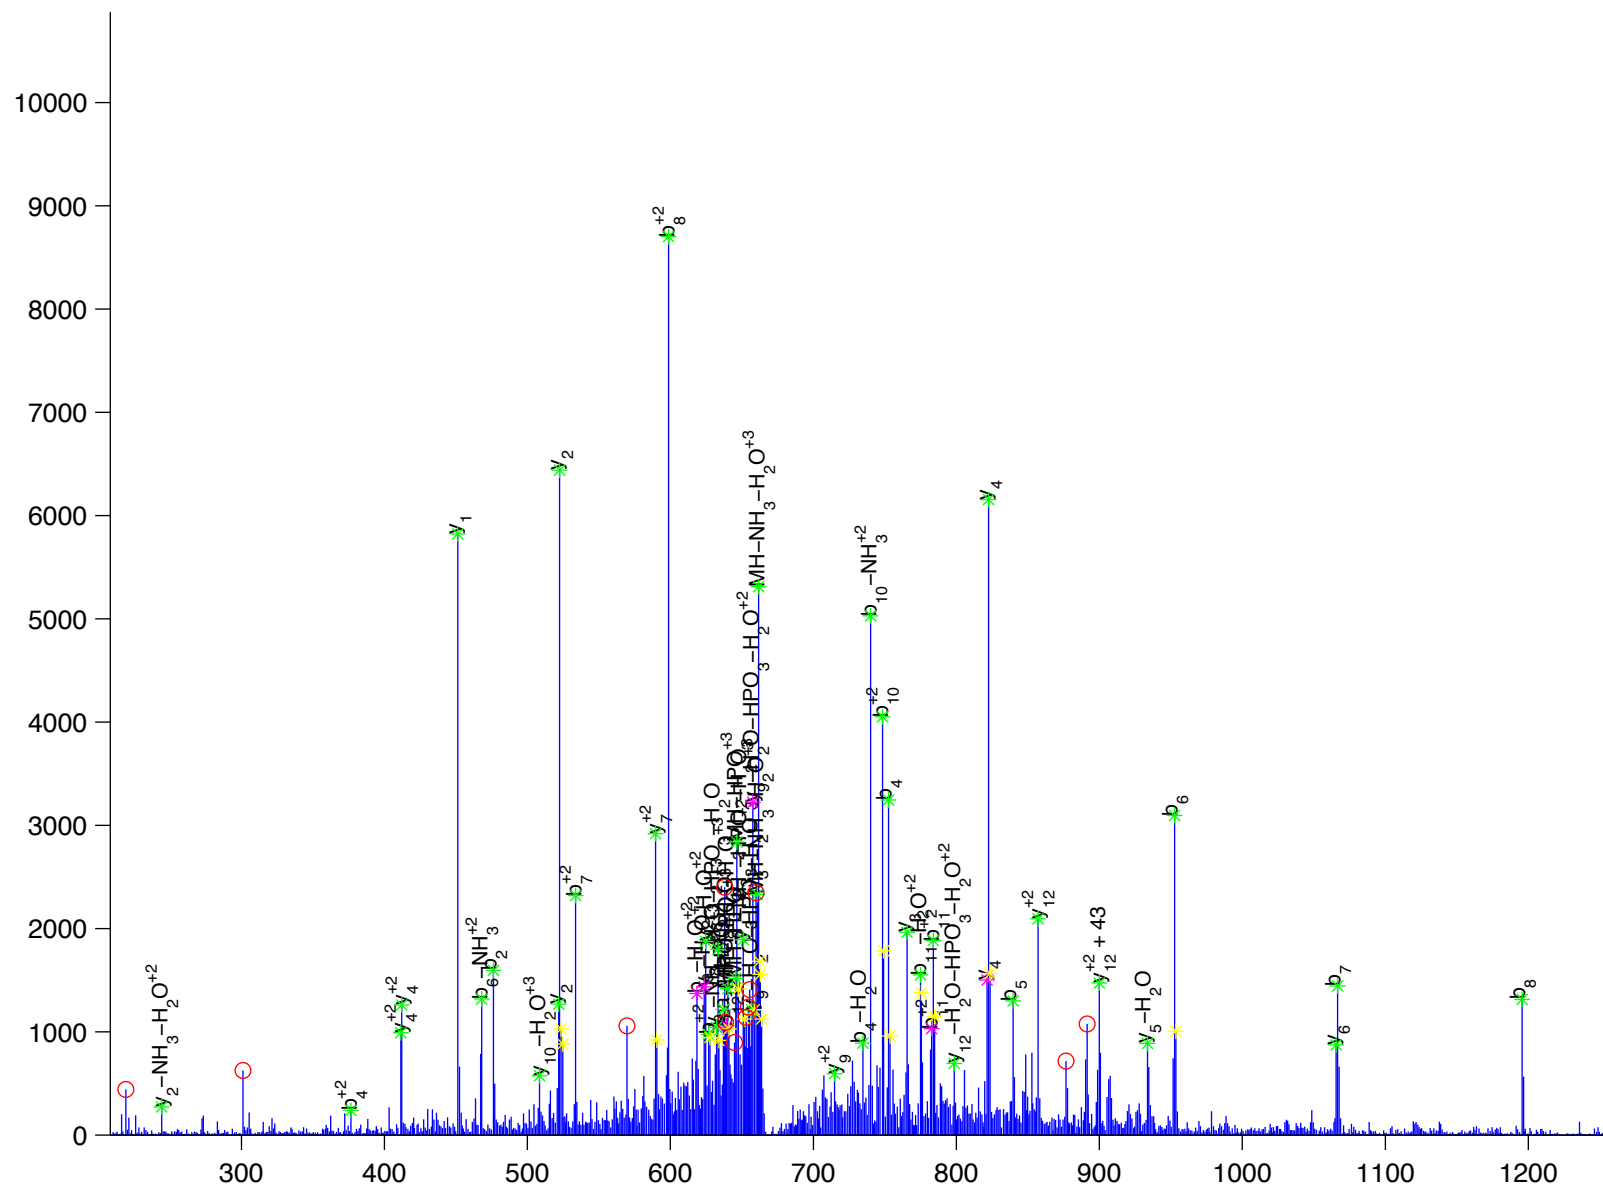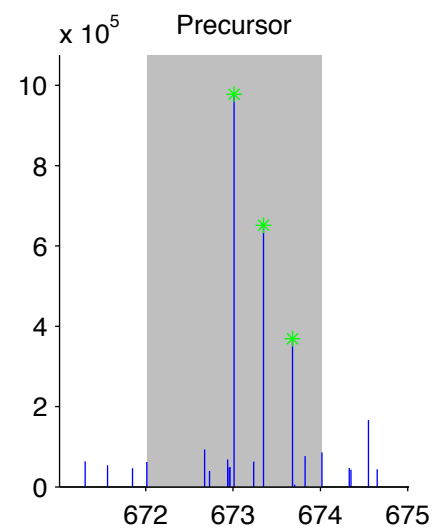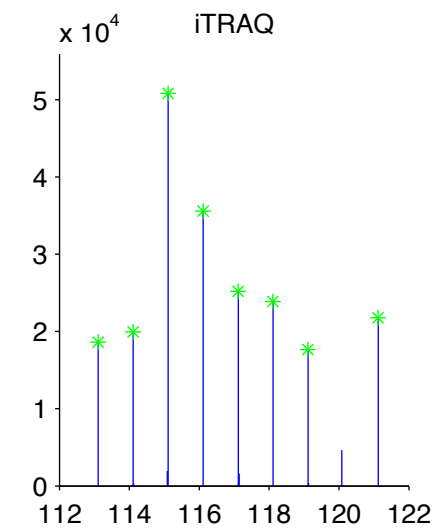



y [ V ] [ G ] [ S ] [ M ] [ V ] [ A ] [ D ] [ I ] [ H ] [ R ]

fructose bisphosphatase 1

Charge State: +3

Scan Number: 5508

File Name: 091130ptp1blivers\_hfd\_basal2.raw

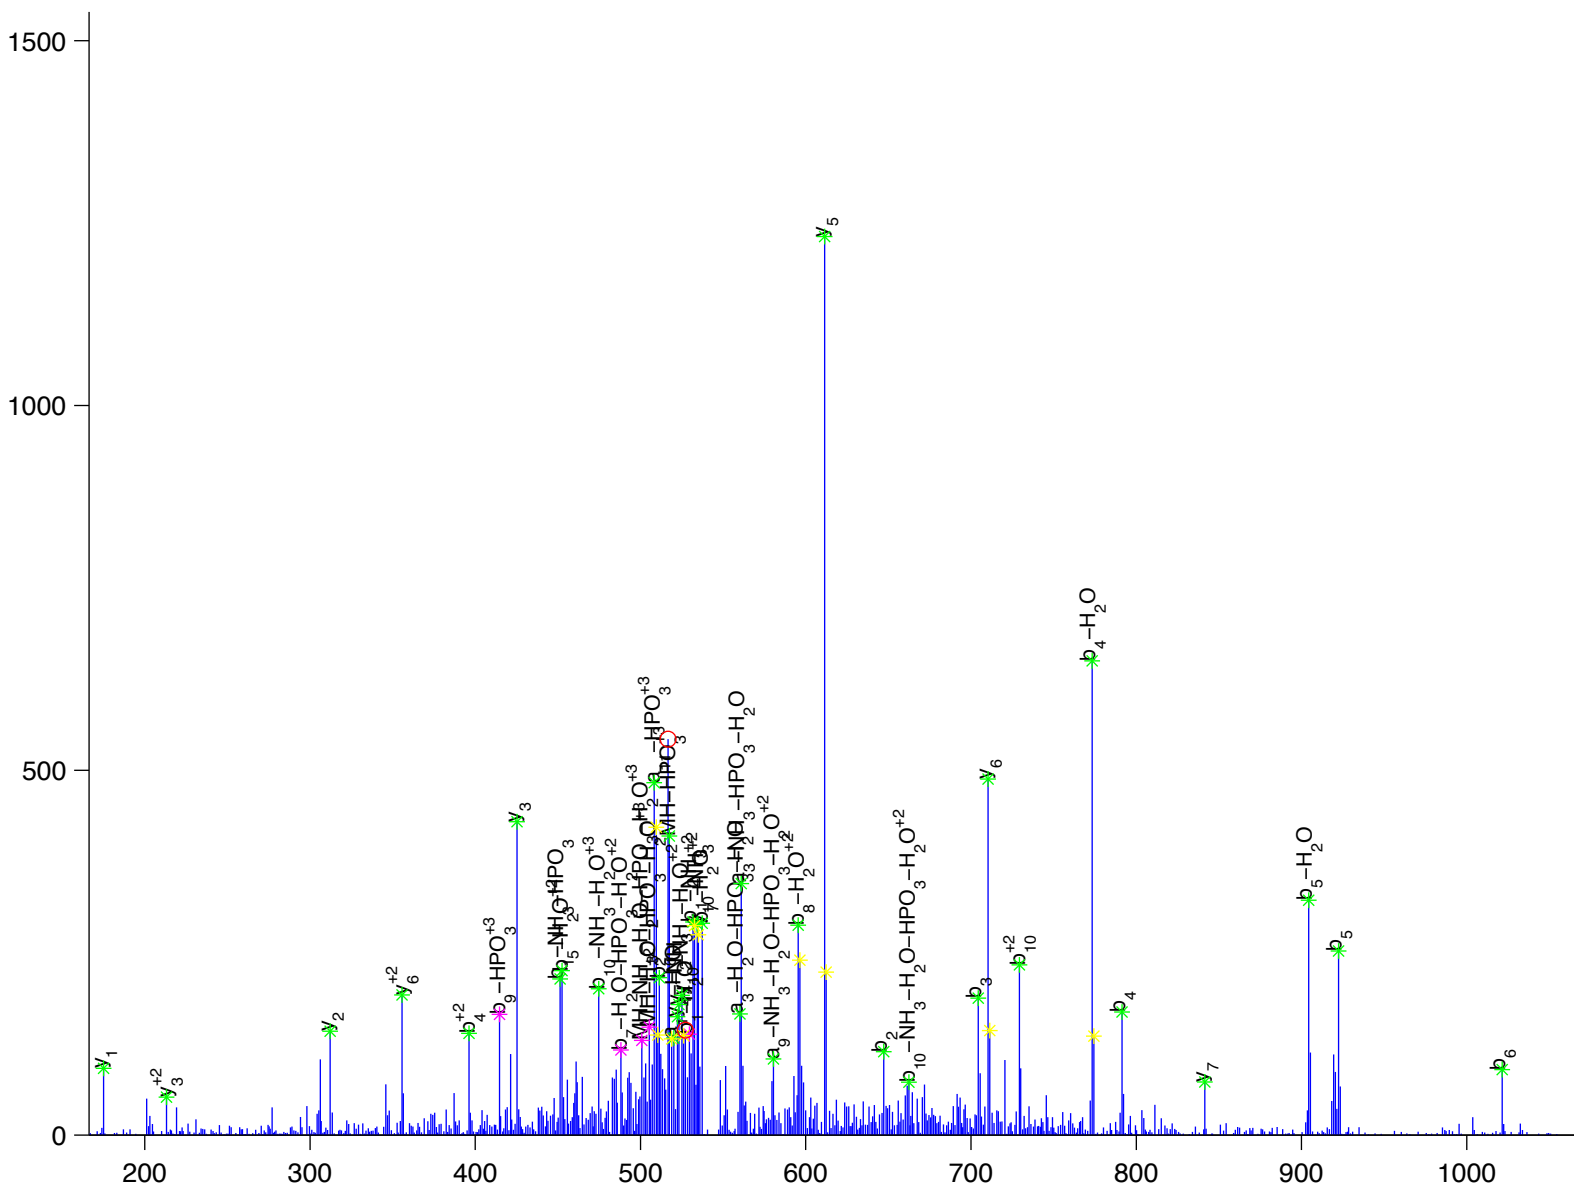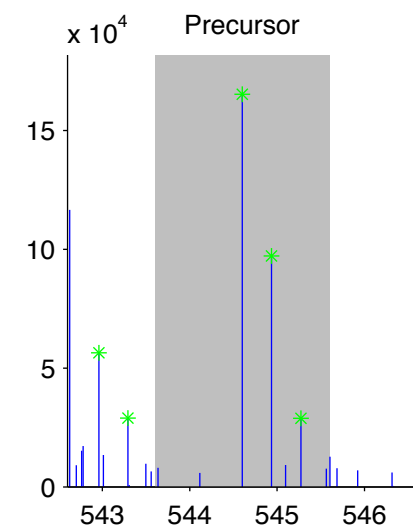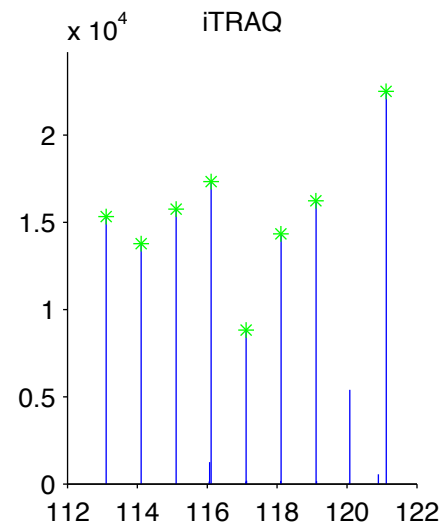

G[N]I[Y]S[L]N[E]G[y]A[K]D[F]D[P]A[I]N[E]Y[L]Q]R

fructose bisphosphatase 1

Charge State: +4

Scan Number: 6072

File Name: 100908ptp1blivers\_ncHFD3\_basal.raw

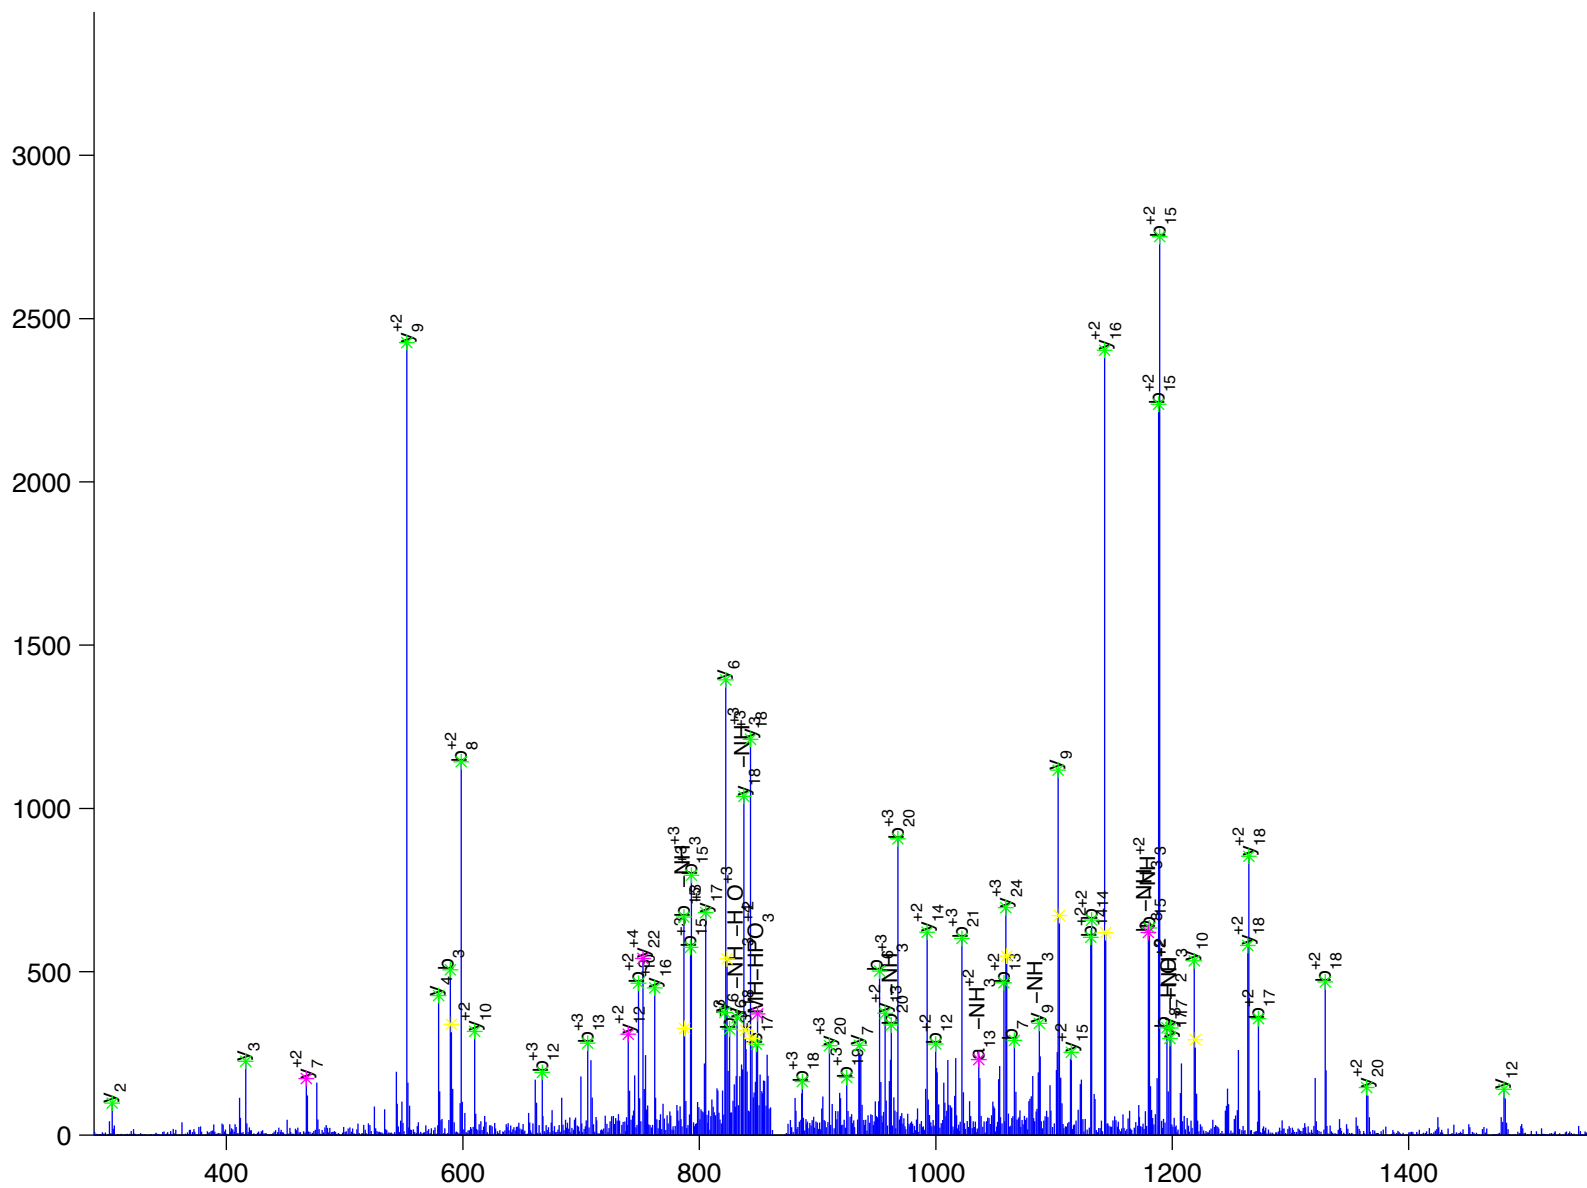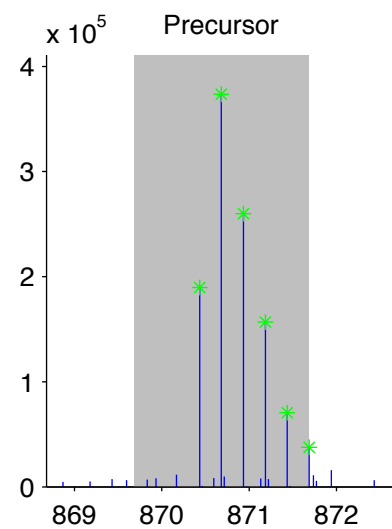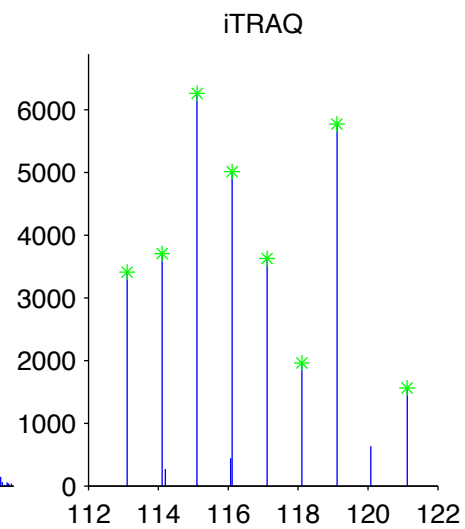



T L V Y G G I F L y P A N K

fructose biphosphatase 1

Charge State: +3

Scan Number: 8074

File Name: 091130ptp1blivers\_hfd\_basal2.raw

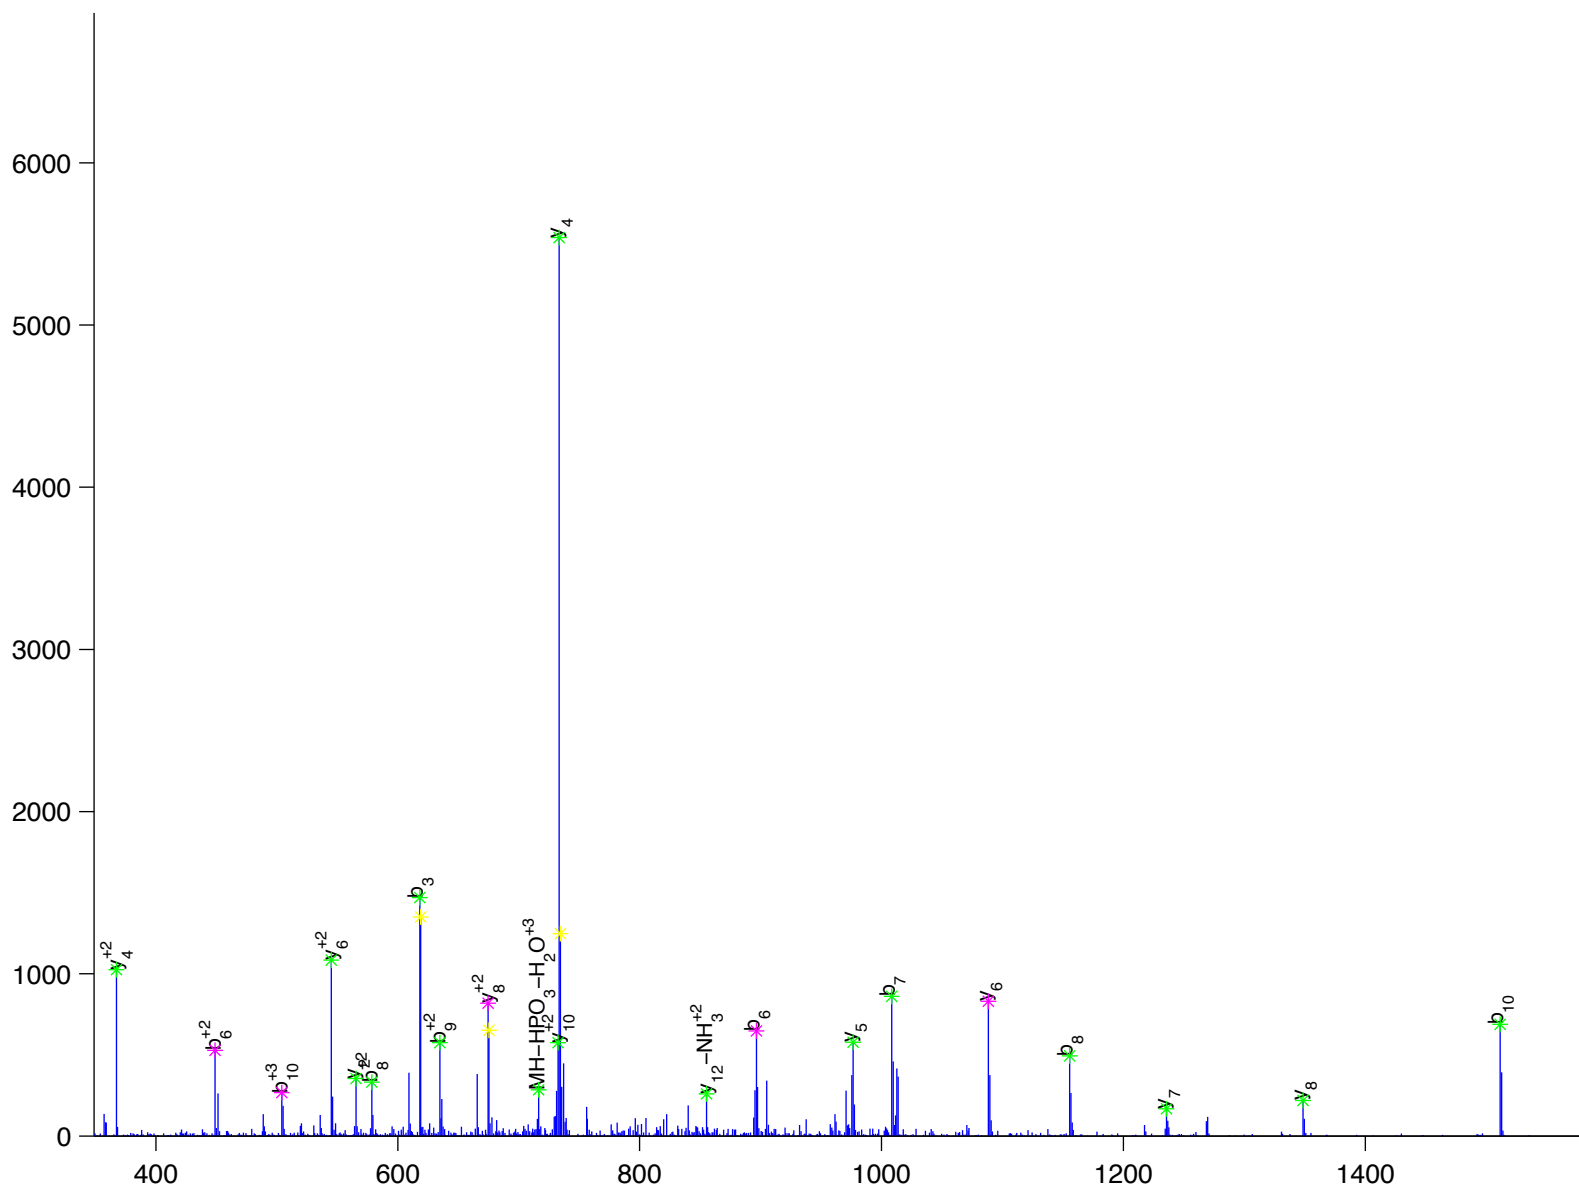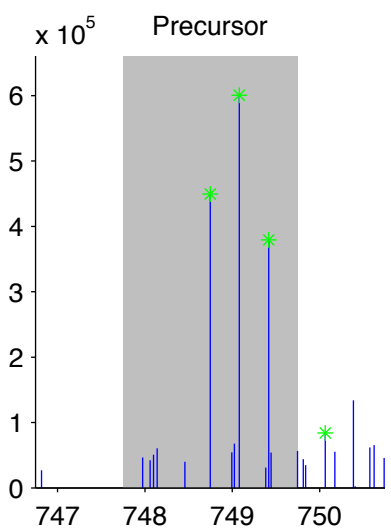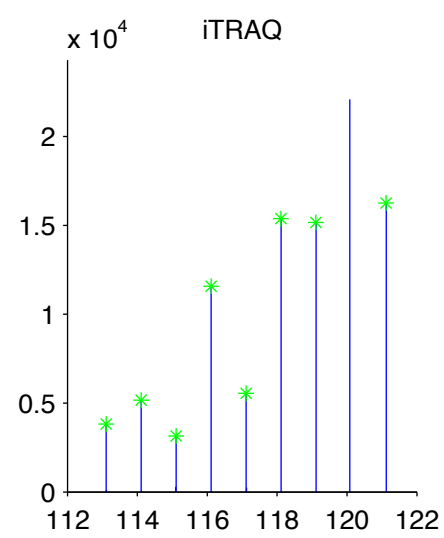

L[M]N[E]S[L]M[L]V[T]A[L]N[P]H[I]G[y]D]K

fumarate hydratase 1

Charge State: +4

Scan Number: 13295

File Name: 090807ptp1blivers\_M\_HFD\_basal.raw

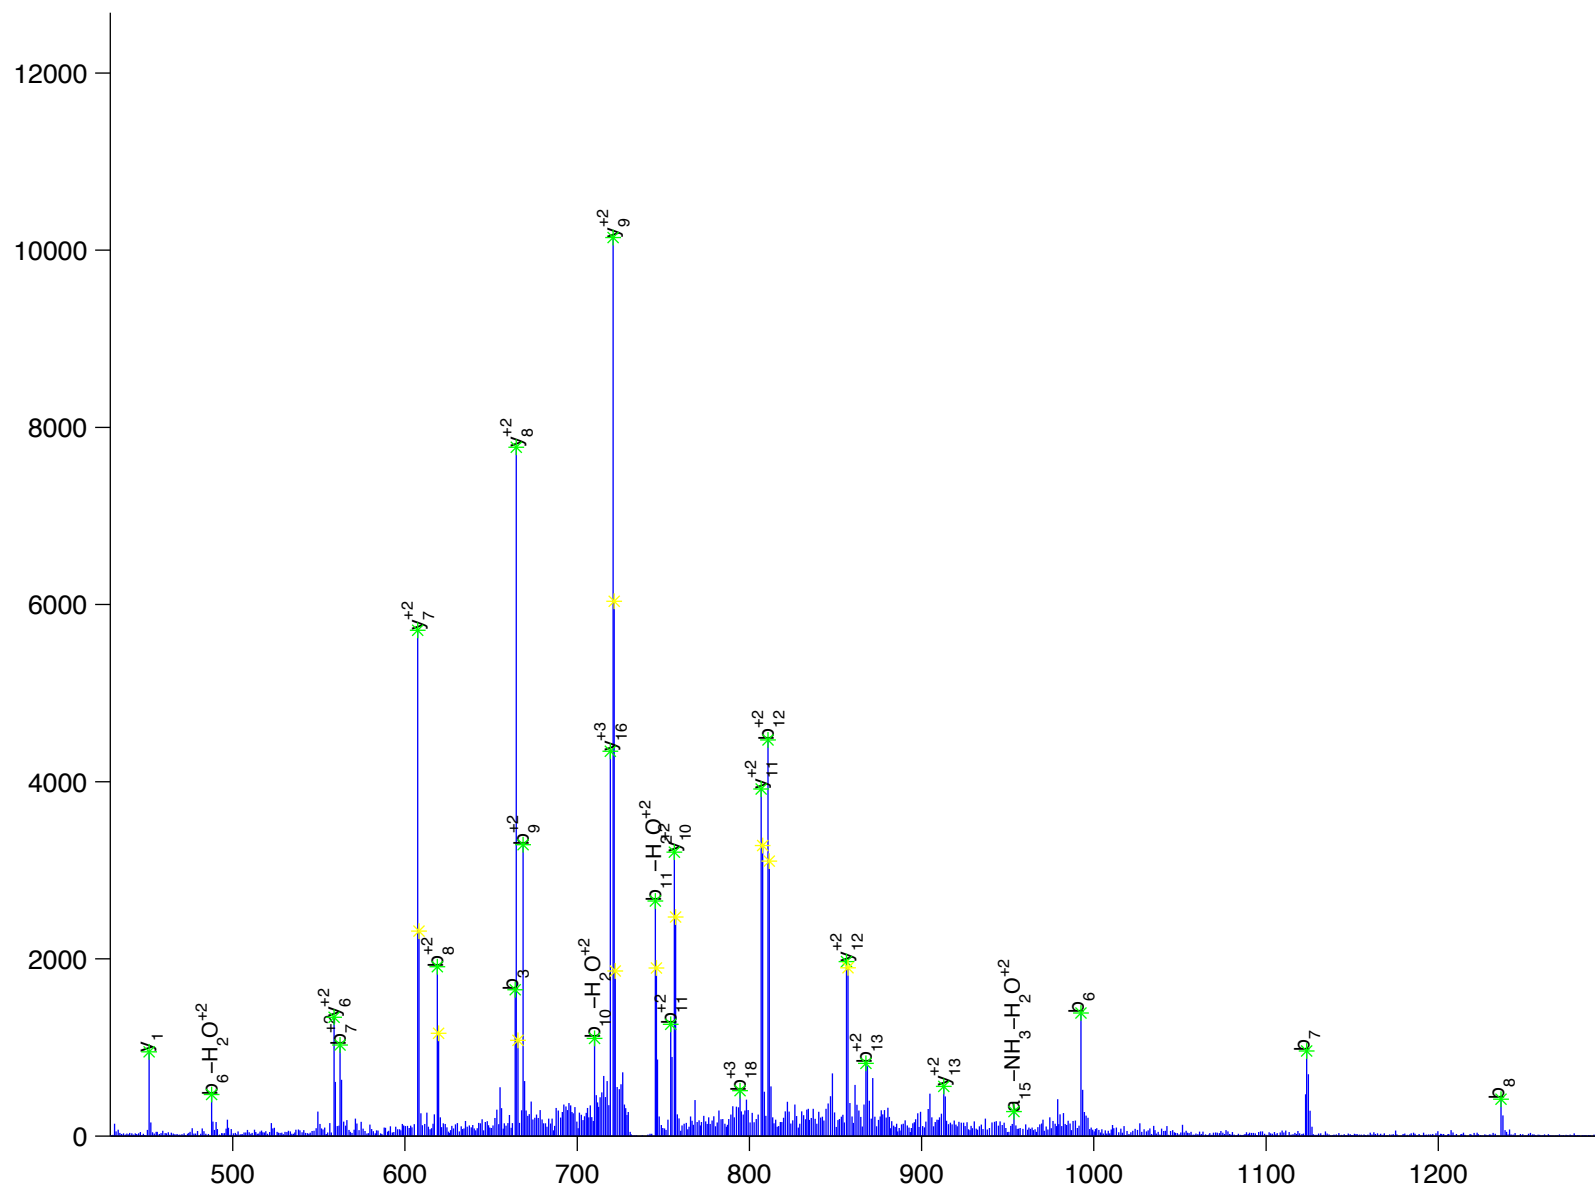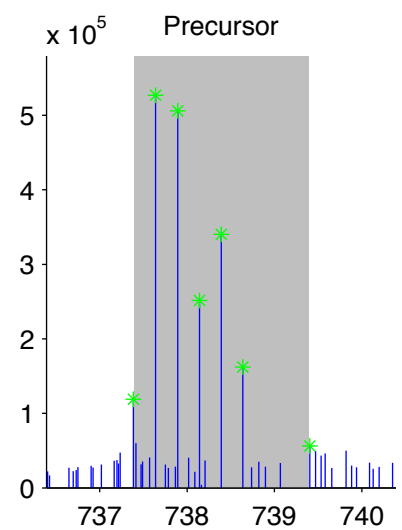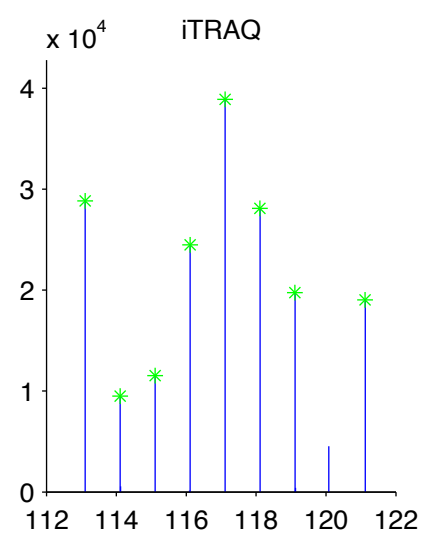

E T A I E L G y L T A E Q F D E W V K P K

fumarate hydratase 1

Charge State: +5

Scan Number: 4736

File Name: HJ072909\_HFD\_E1\_2.raw

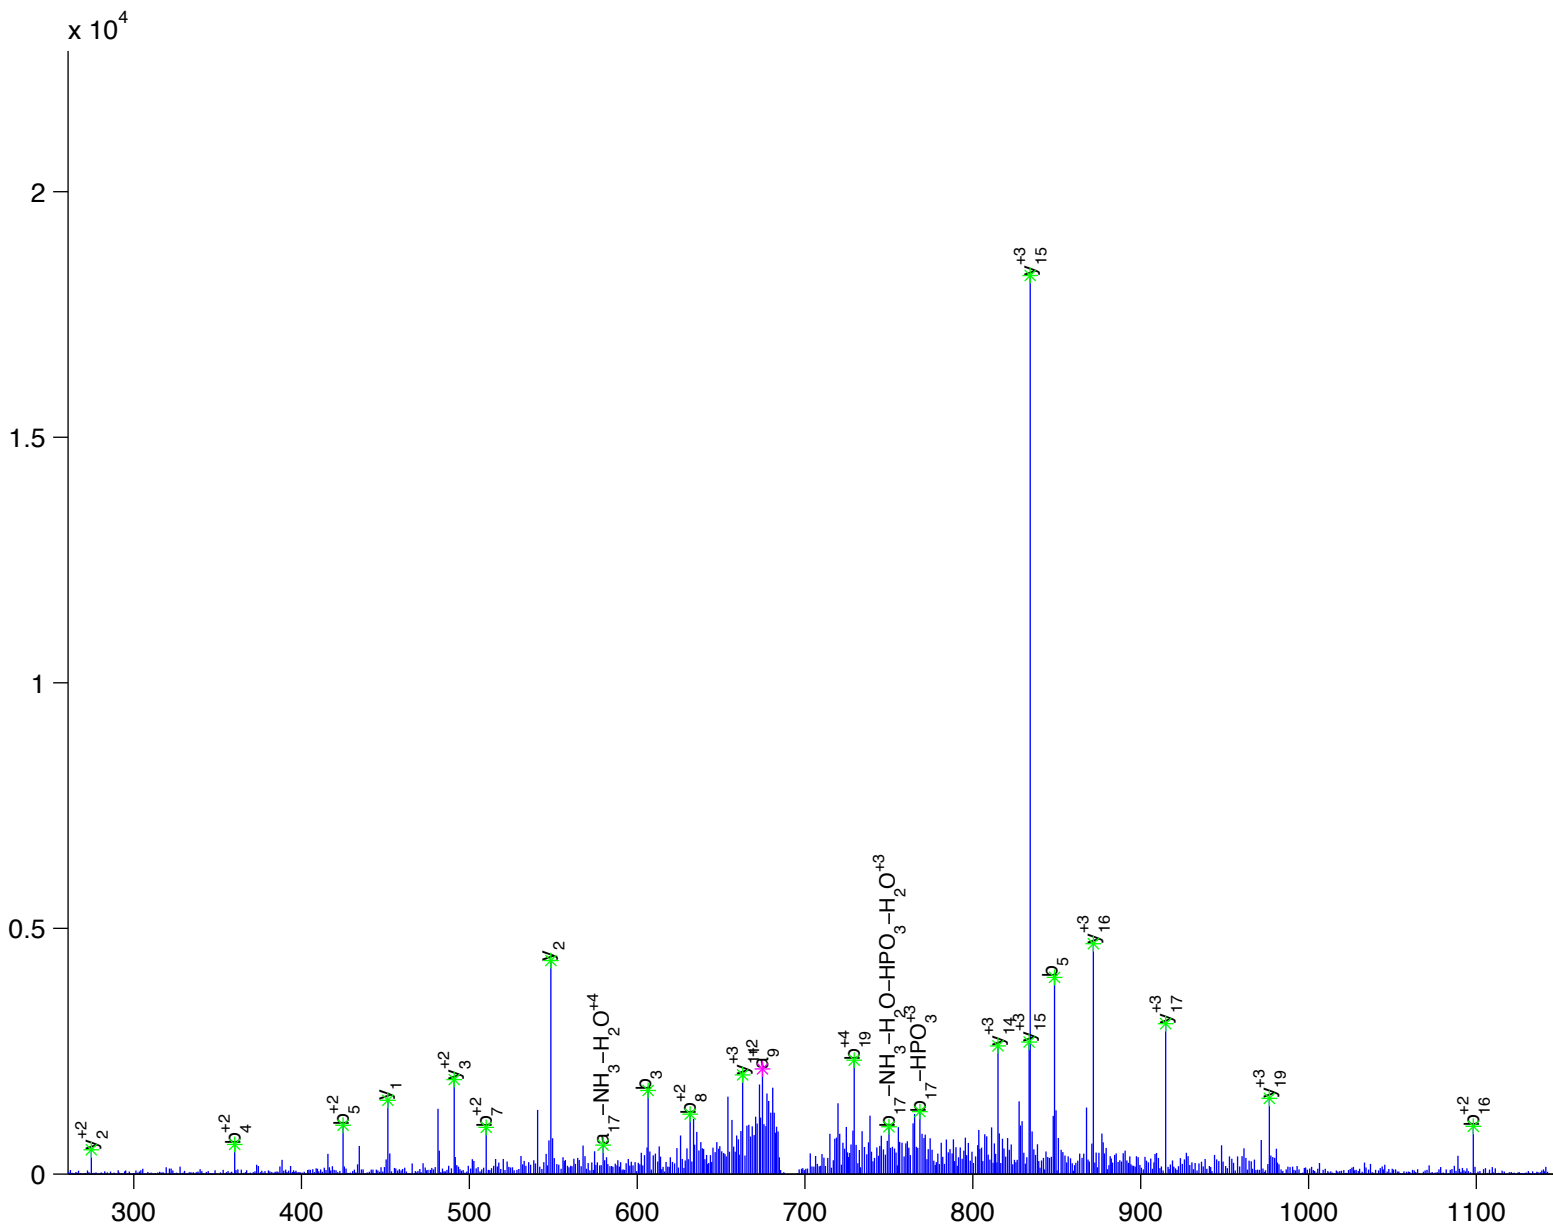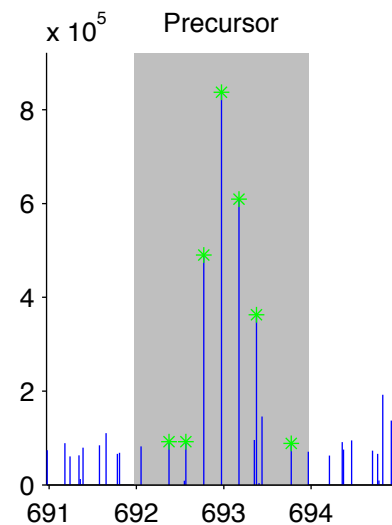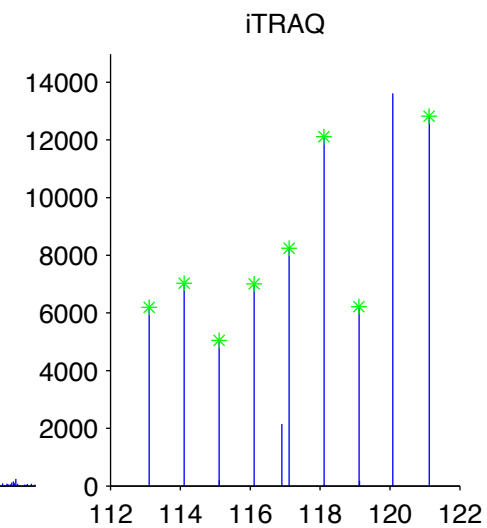



G [P] [S] [E] [G] [A] y [D] [V] [I] [L] [P] [R]

G protein-coupled receptor, family C, group 5, member C

Charge State: +2

Scan Number: 6150

File Name: 090806ptp1blivers\_M\_NC2.raw

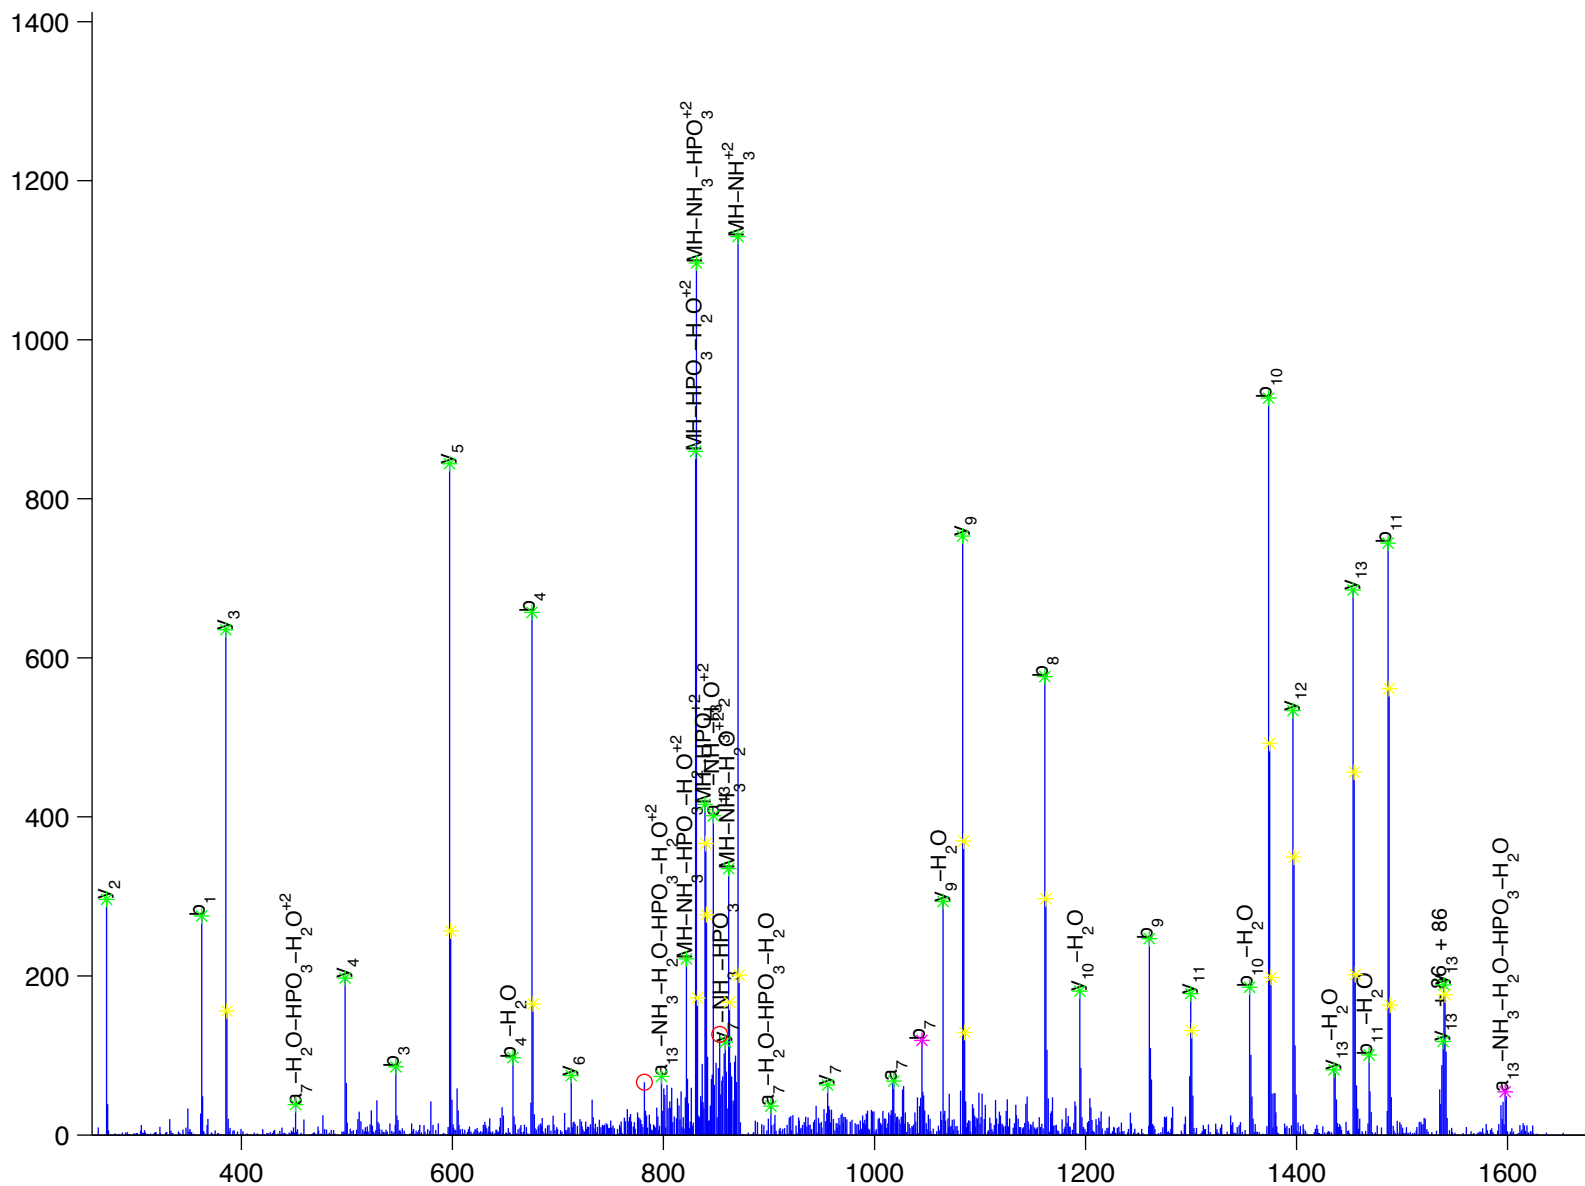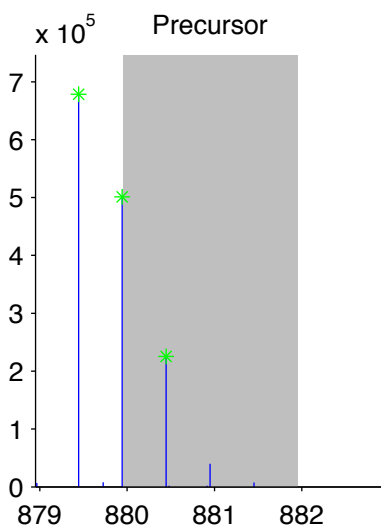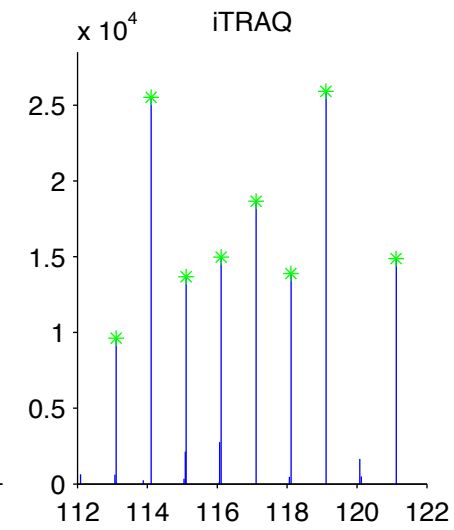



N [ E ] [ E ] [ E ] [ N ] [ I ] [ y ] [ S ] [ V ] [ P ] [ H ] [ D ] [ S ] [ T ] [ Q ] [ G ] K

glucocorticoid receptor DNA binding factor 1

Charge State: +4

Scan Number: 4181

File Name: 091130ptp1blivers\_hfd\_basal2.raw

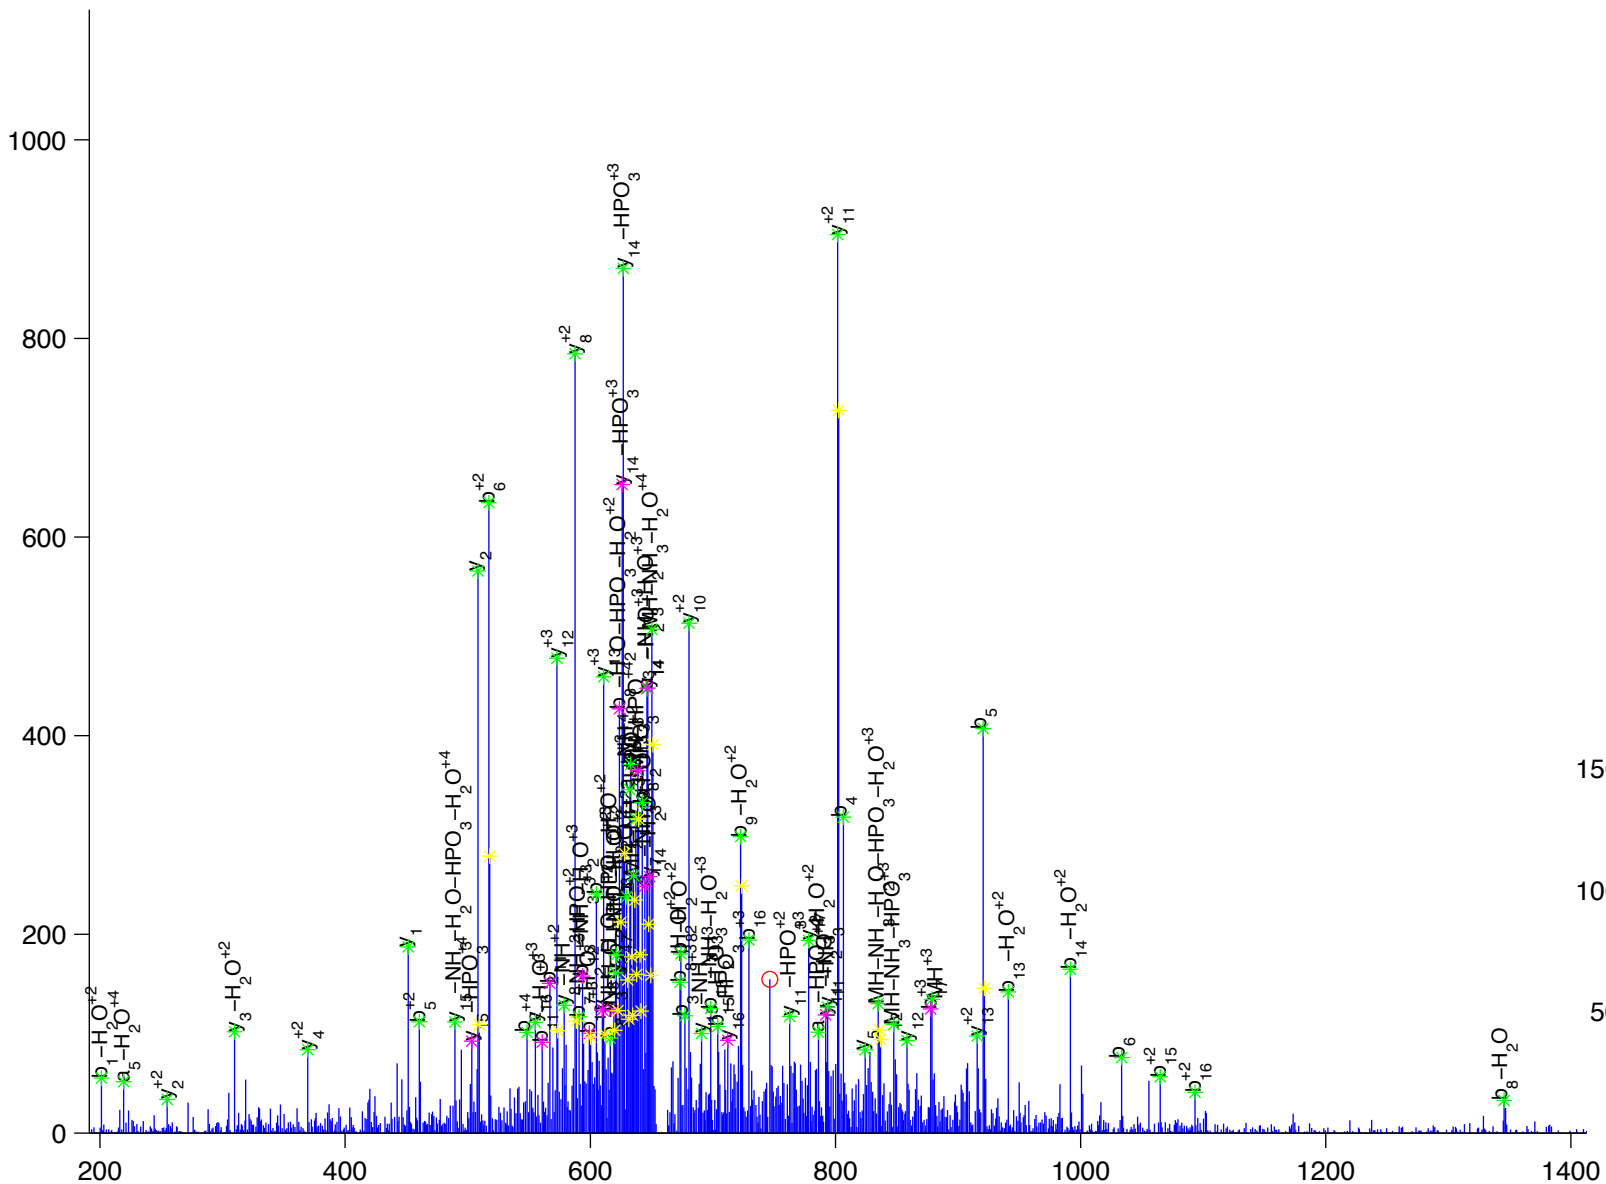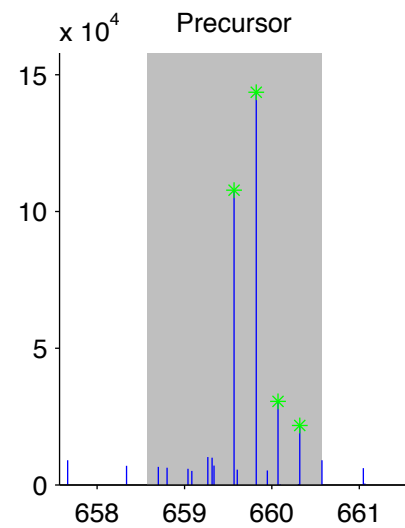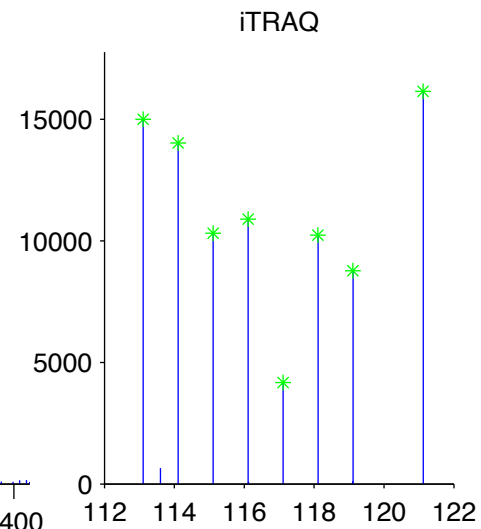

S [ M ] S [ S ] S [ P ] W [ M ] P [ Q ] D [ G ] F [ D ] P [ S ] D [ y ] A [ E ] P [ M ] D [ A ] V [ V ] K [ P ] R

glucocorticoid receptor DNA binding factor 1

Charge State: +3

Scan Number: 6149

File Name: 090728ptp1blivers\_M\_NC\_ins\_e.raw

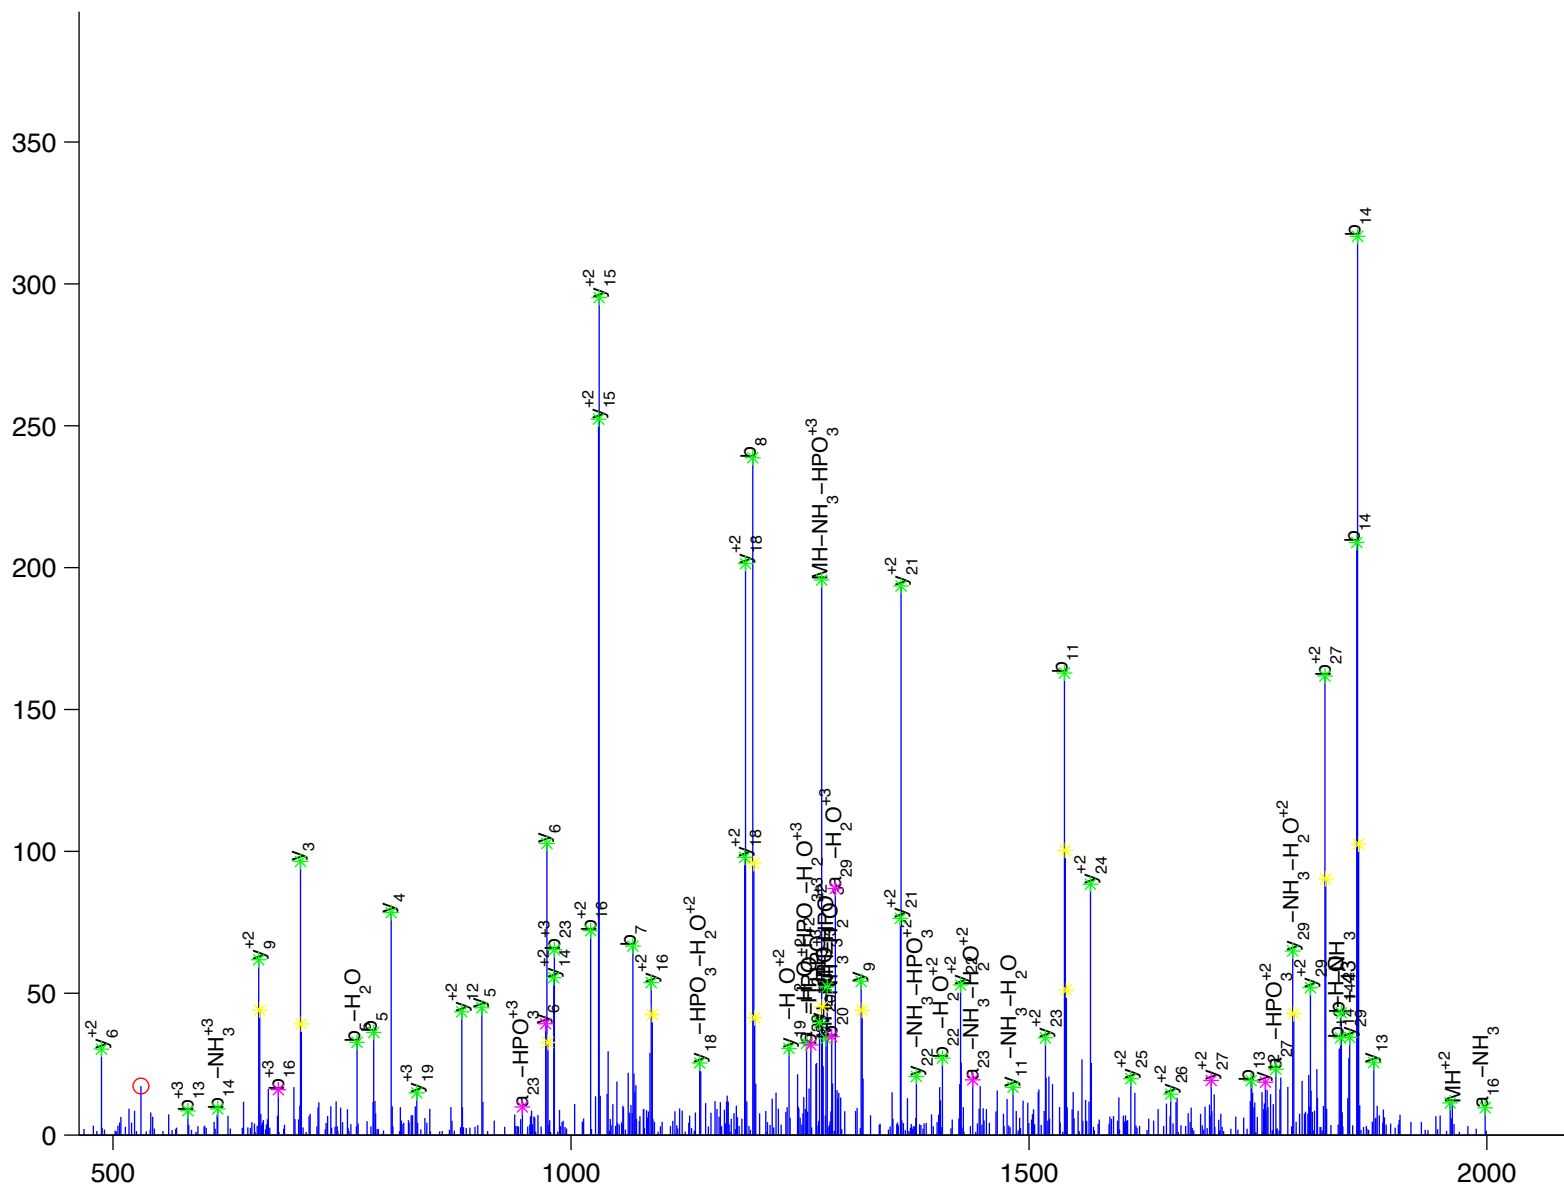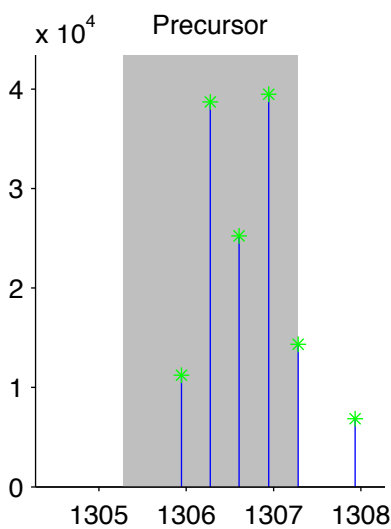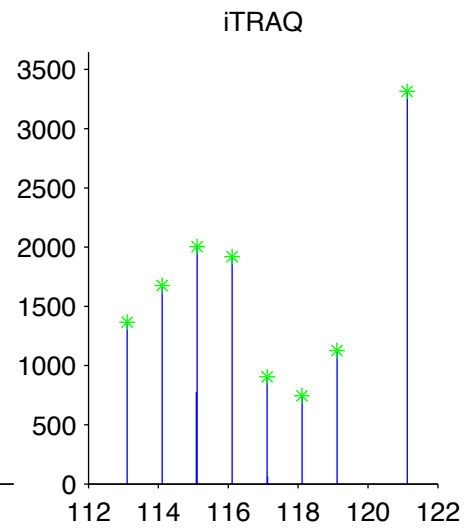

D[D[G[S[W]E[V]I[E]G]y]R

glutamate dehydrogenase 1

Charge State: +3

Scan Number: 4595

File Name: 100827ptp1blivers\_ncHFD\_basal.raw

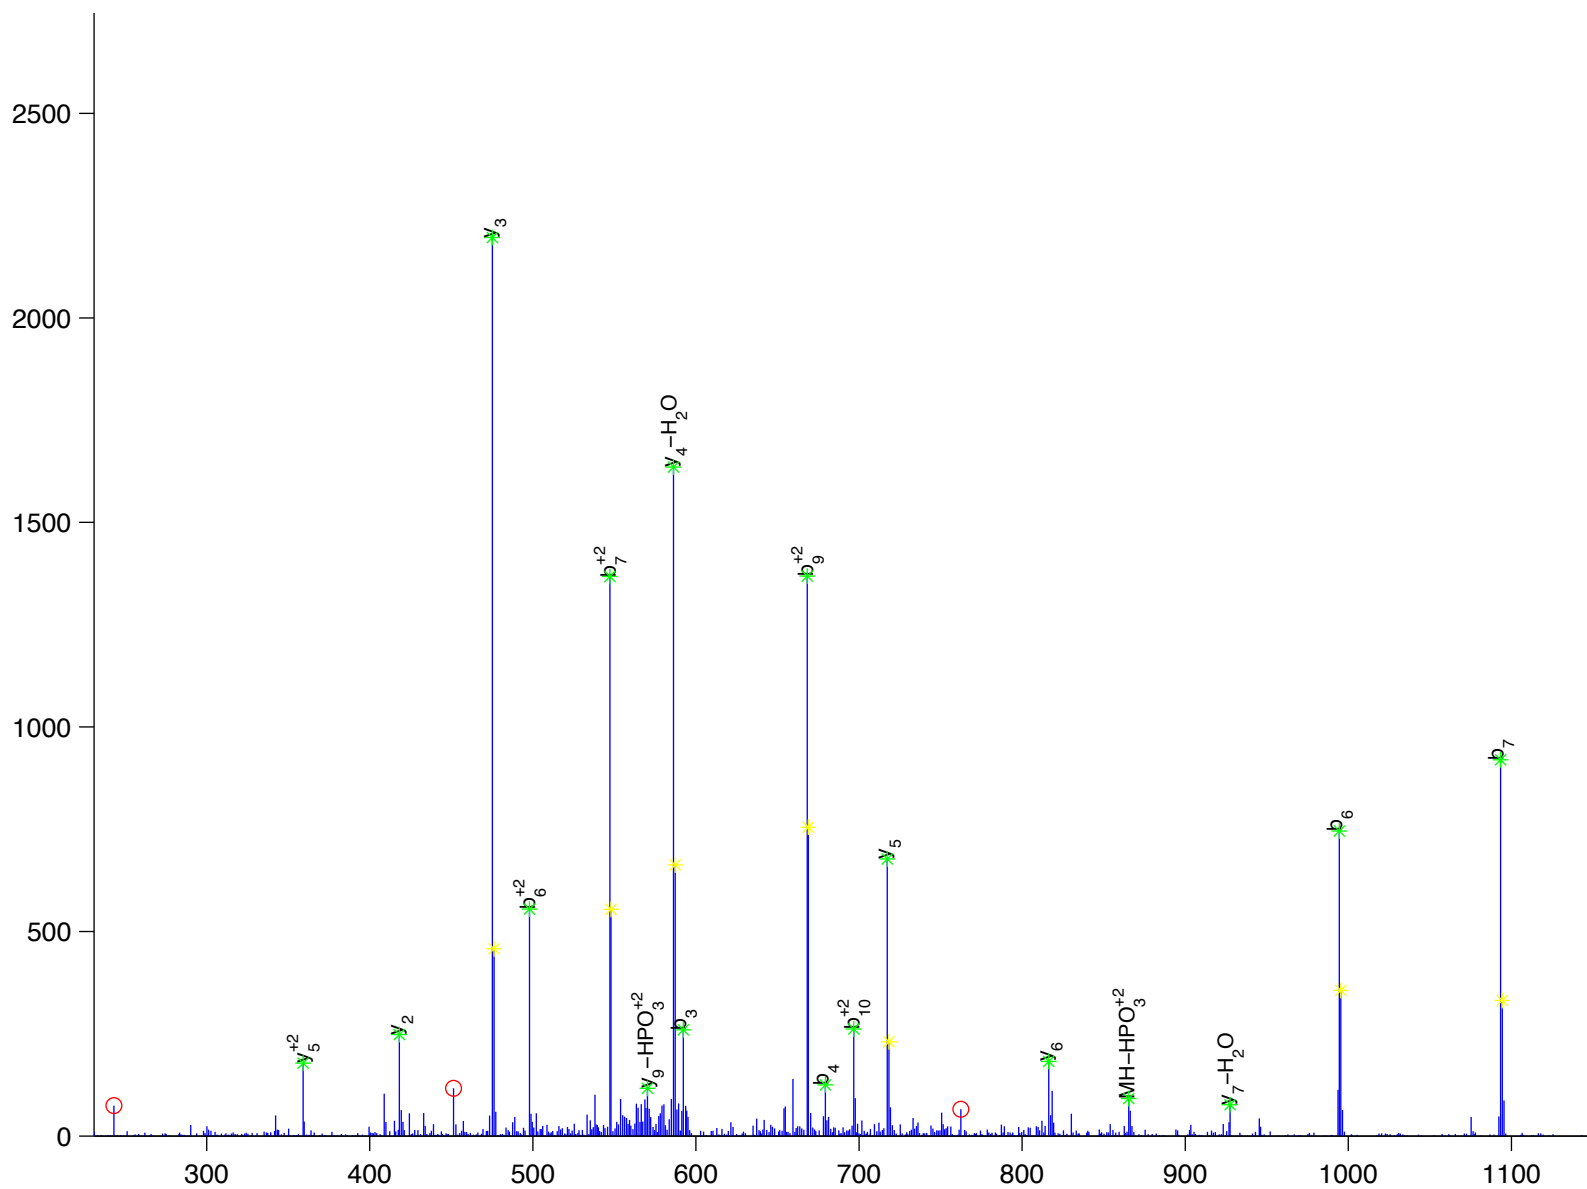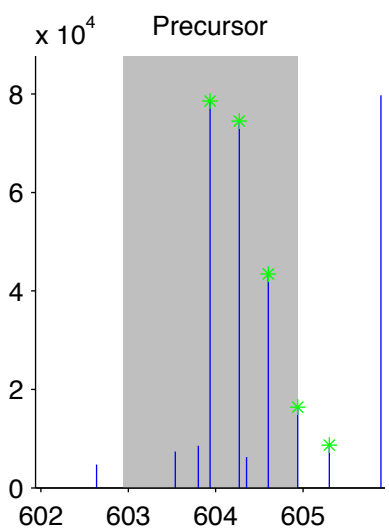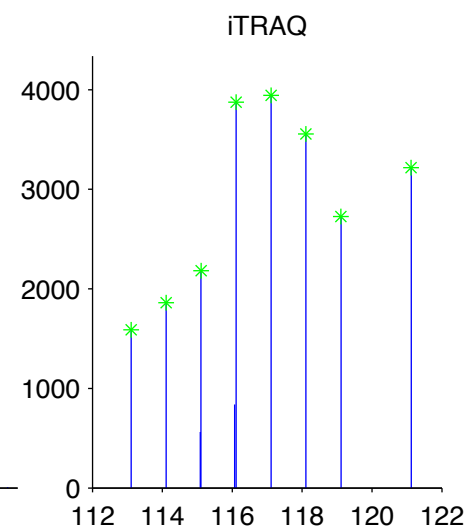

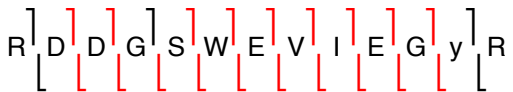

glutamate dehydrogenase 1

Charge State: +3

Scan Number: 5528

File Name: 100908ptp1blivers\_ncHFD3\_basal.raw

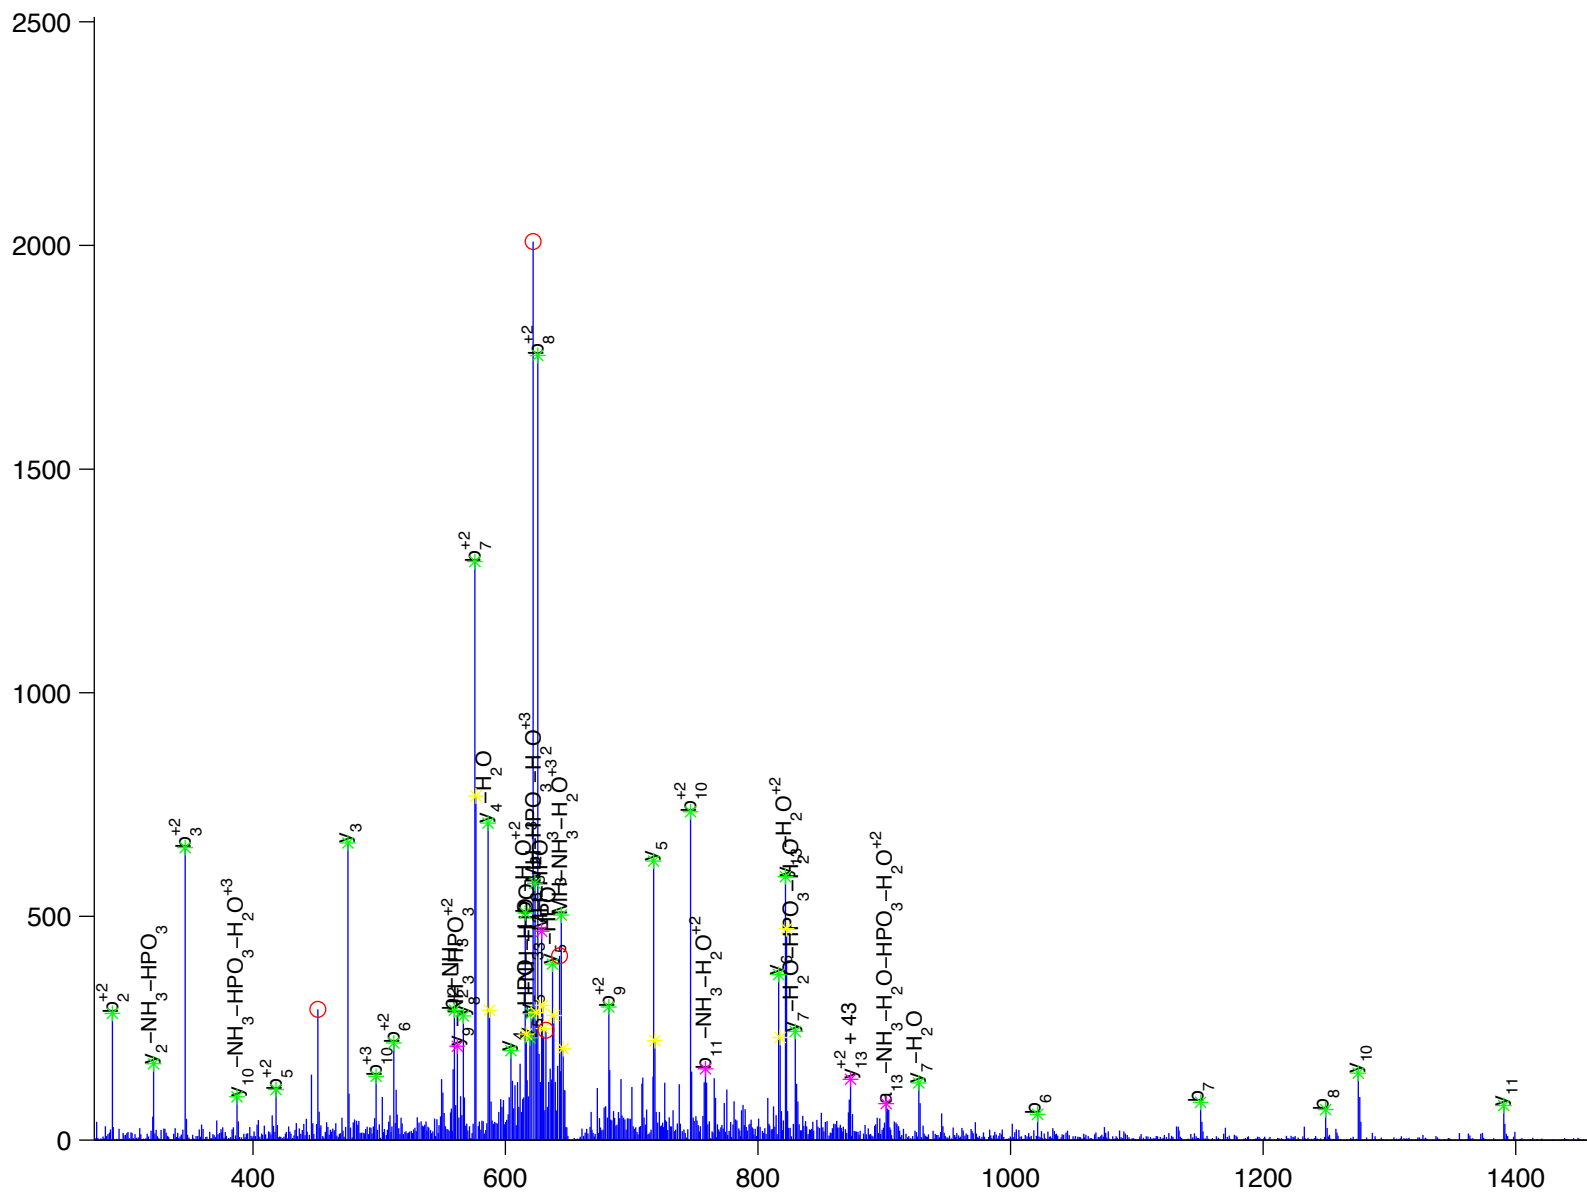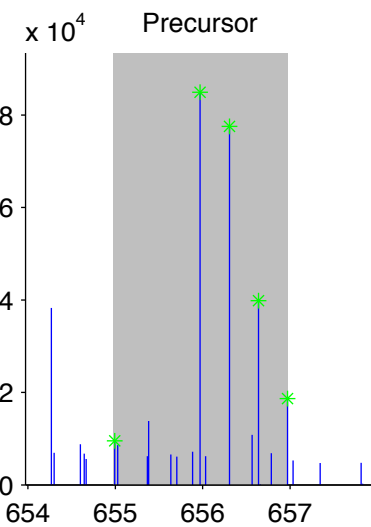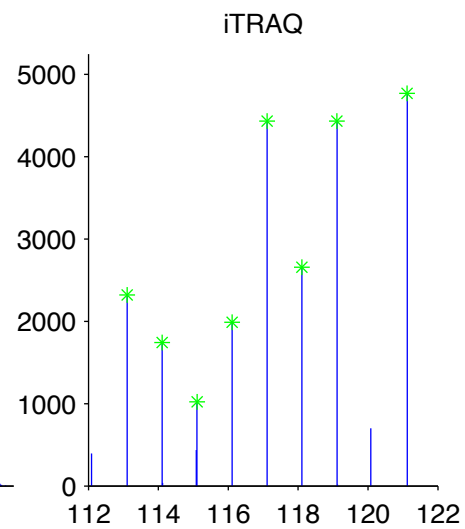

D I V H S G L A y T M E R

glutamate dehydrogenase 1

Charge State: +2

Scan Number: 6952

File Name: 090807ptp1blivers\_M\_HFD\_basal.raw

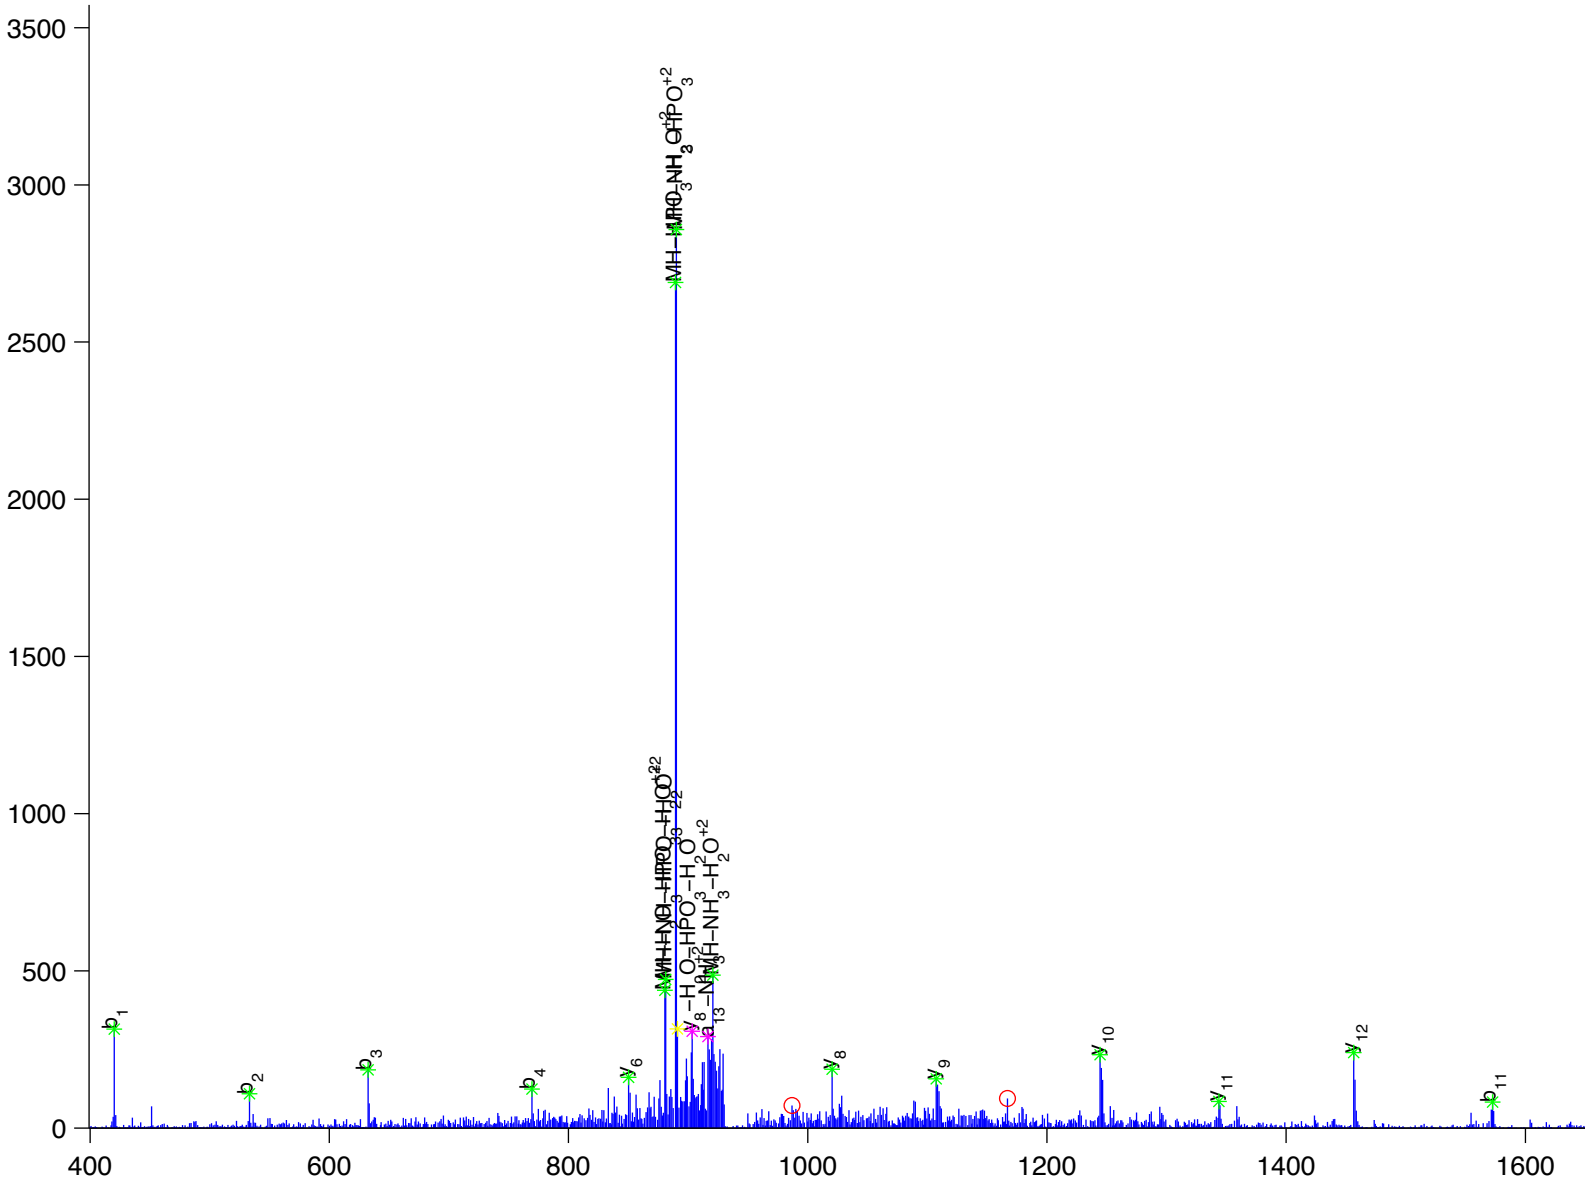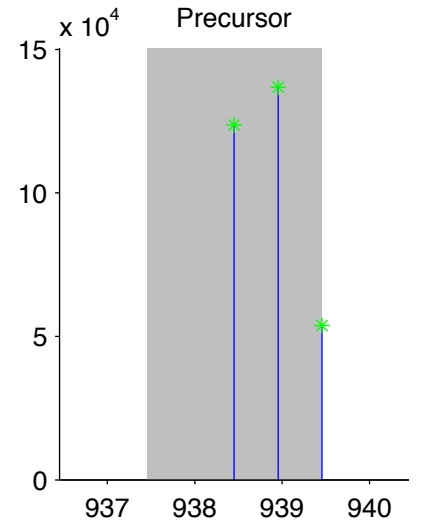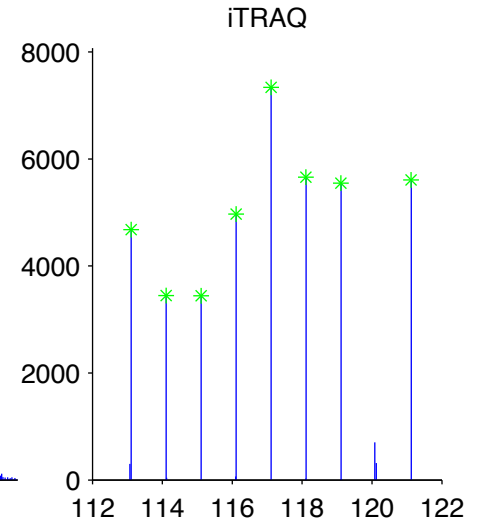

N [ F ] G [ L ] y [ N ] E [ R ]

glutamate oxaloacetate transaminase 1, soluble

Charge State: +2

Scan Number: 5058

File Name: 091130ptp1blivers\_hfd\_basal2.raw

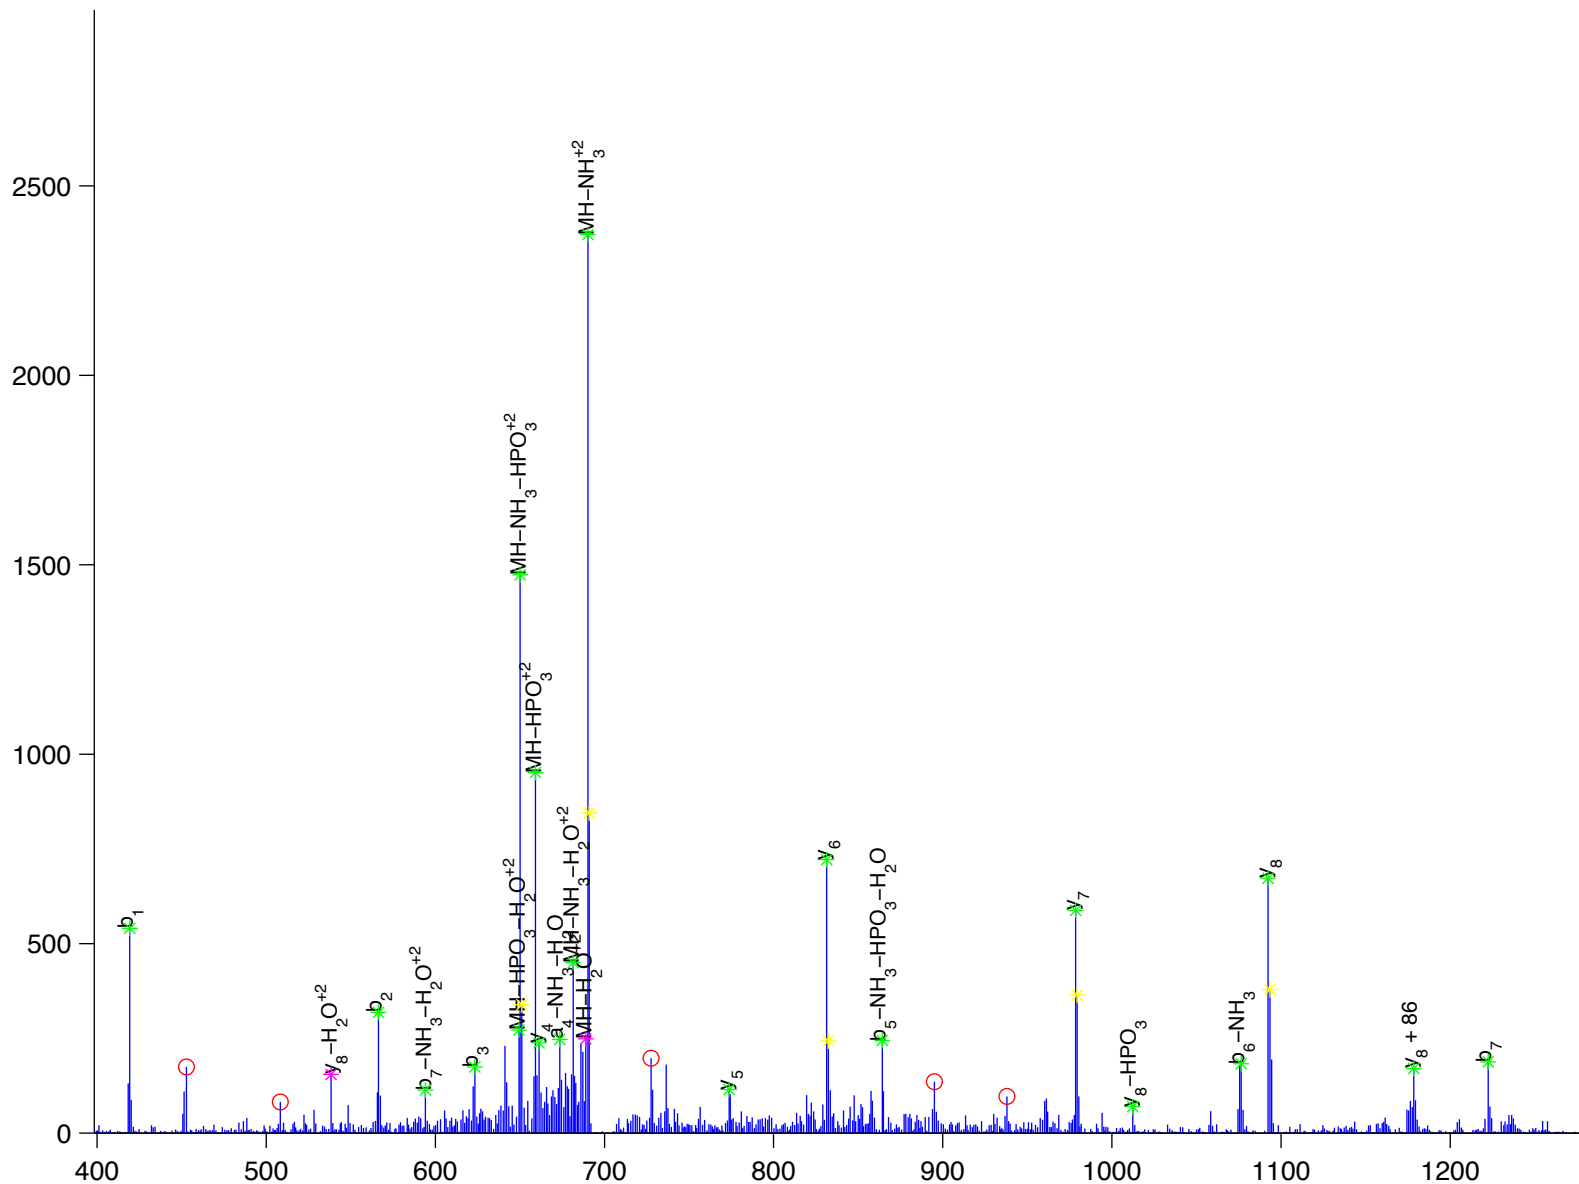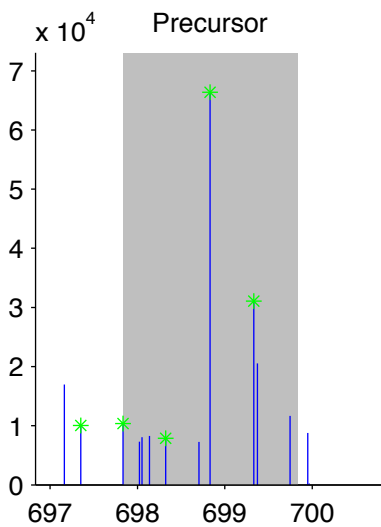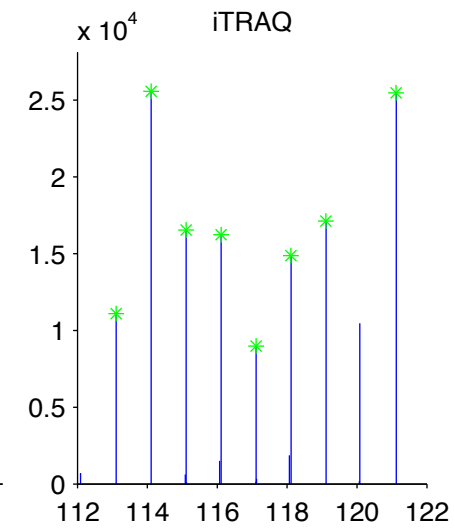

I [A] [N] [D] [N] [S] [L] [N] [H] [E] y [L] [P] [I] [L] [G] [L] [A] [E] [F] R

glutamate oxaloacetate transaminase 1, soluble

Charge State: +3

Scan Number: 7464

File Name: 090728ptp1blivers\_M\_NC\_ins\_e.raw

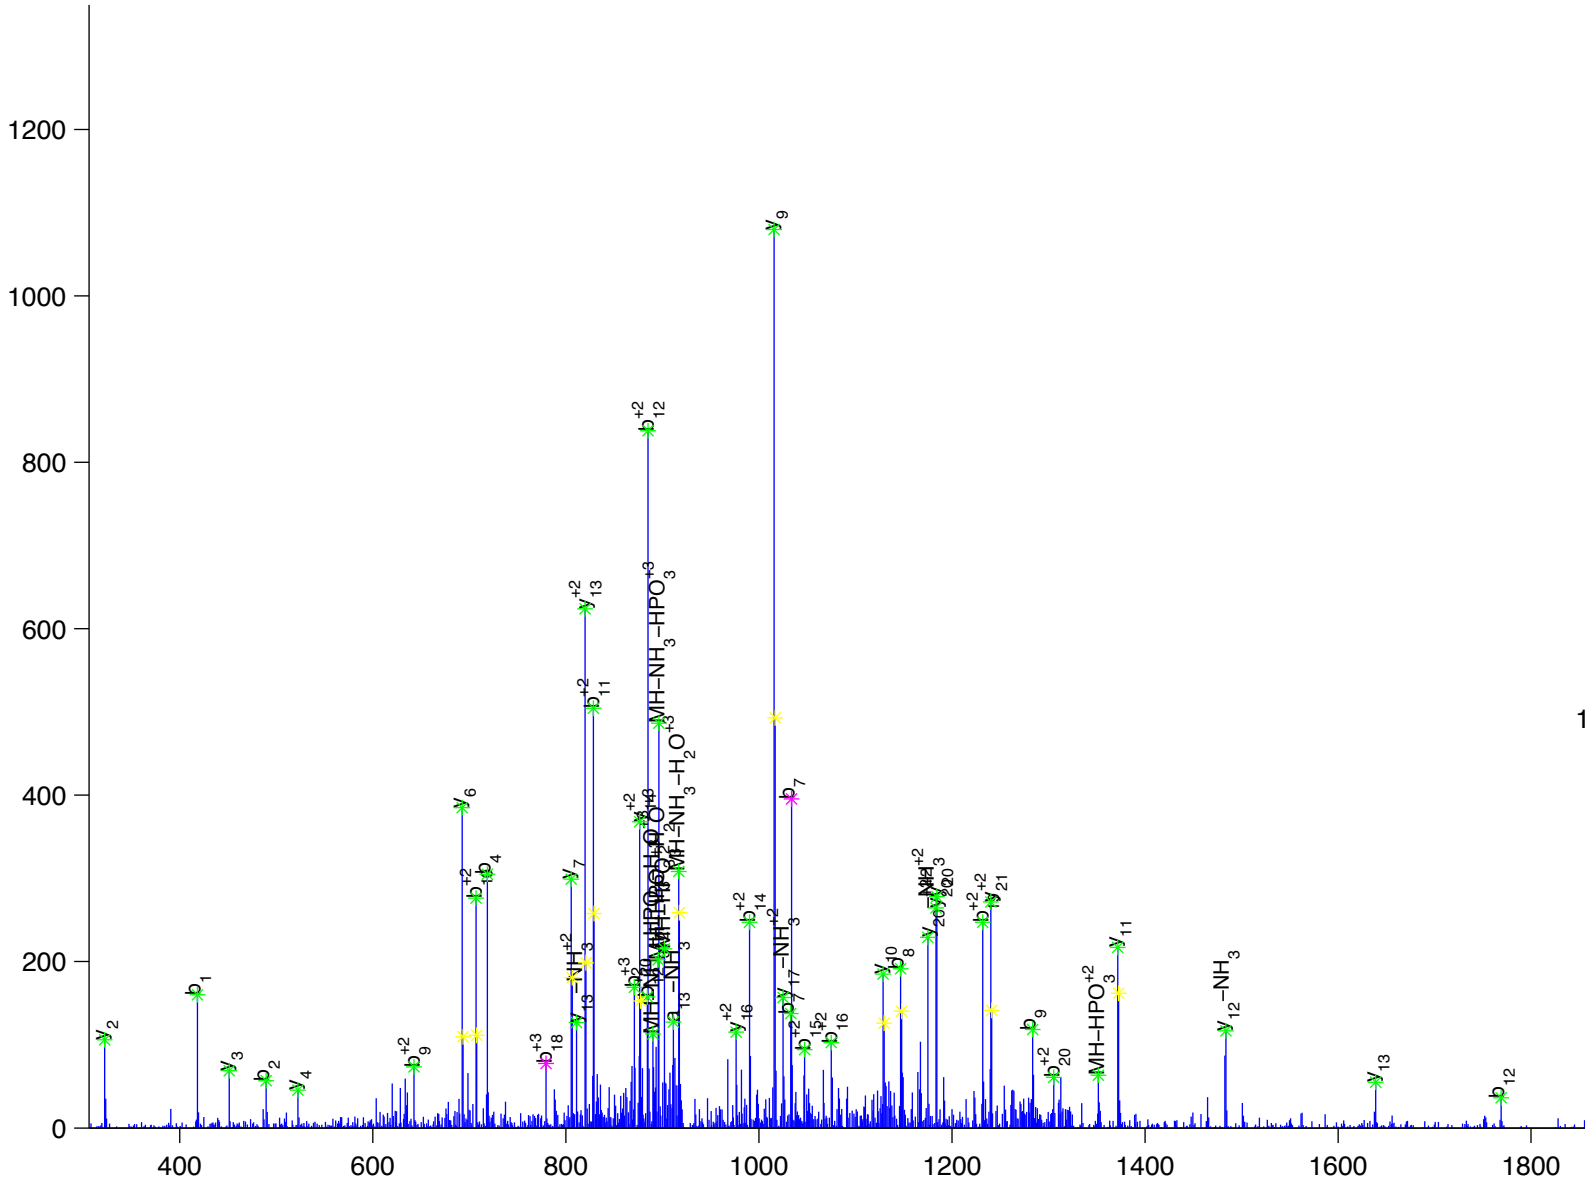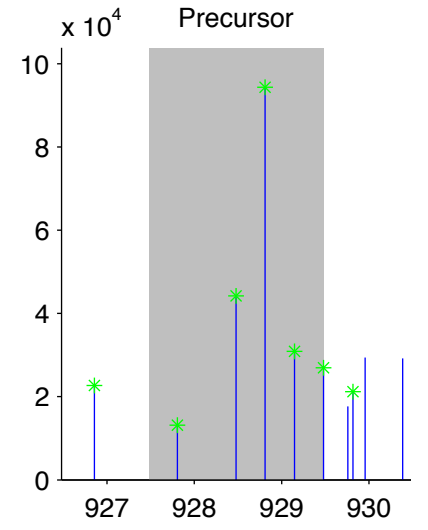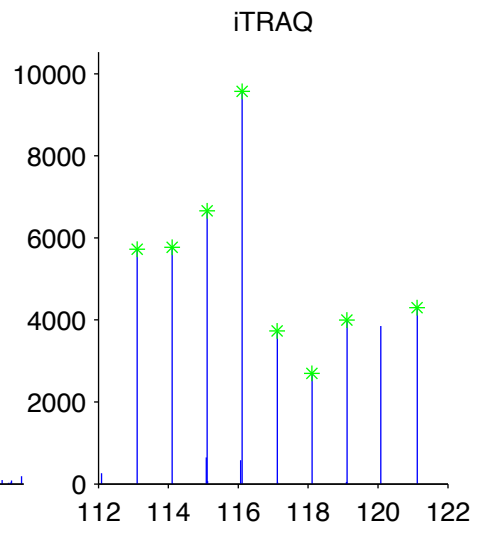

N [ M ] G [ L ] y [ G ] E [ R ]

glutamate oxaloacetate transaminase 2, mitochondrial

Charge State: +2

Scan Number: 4344

File Name: 091130ptp1blivers\_hfd\_basal2.raw

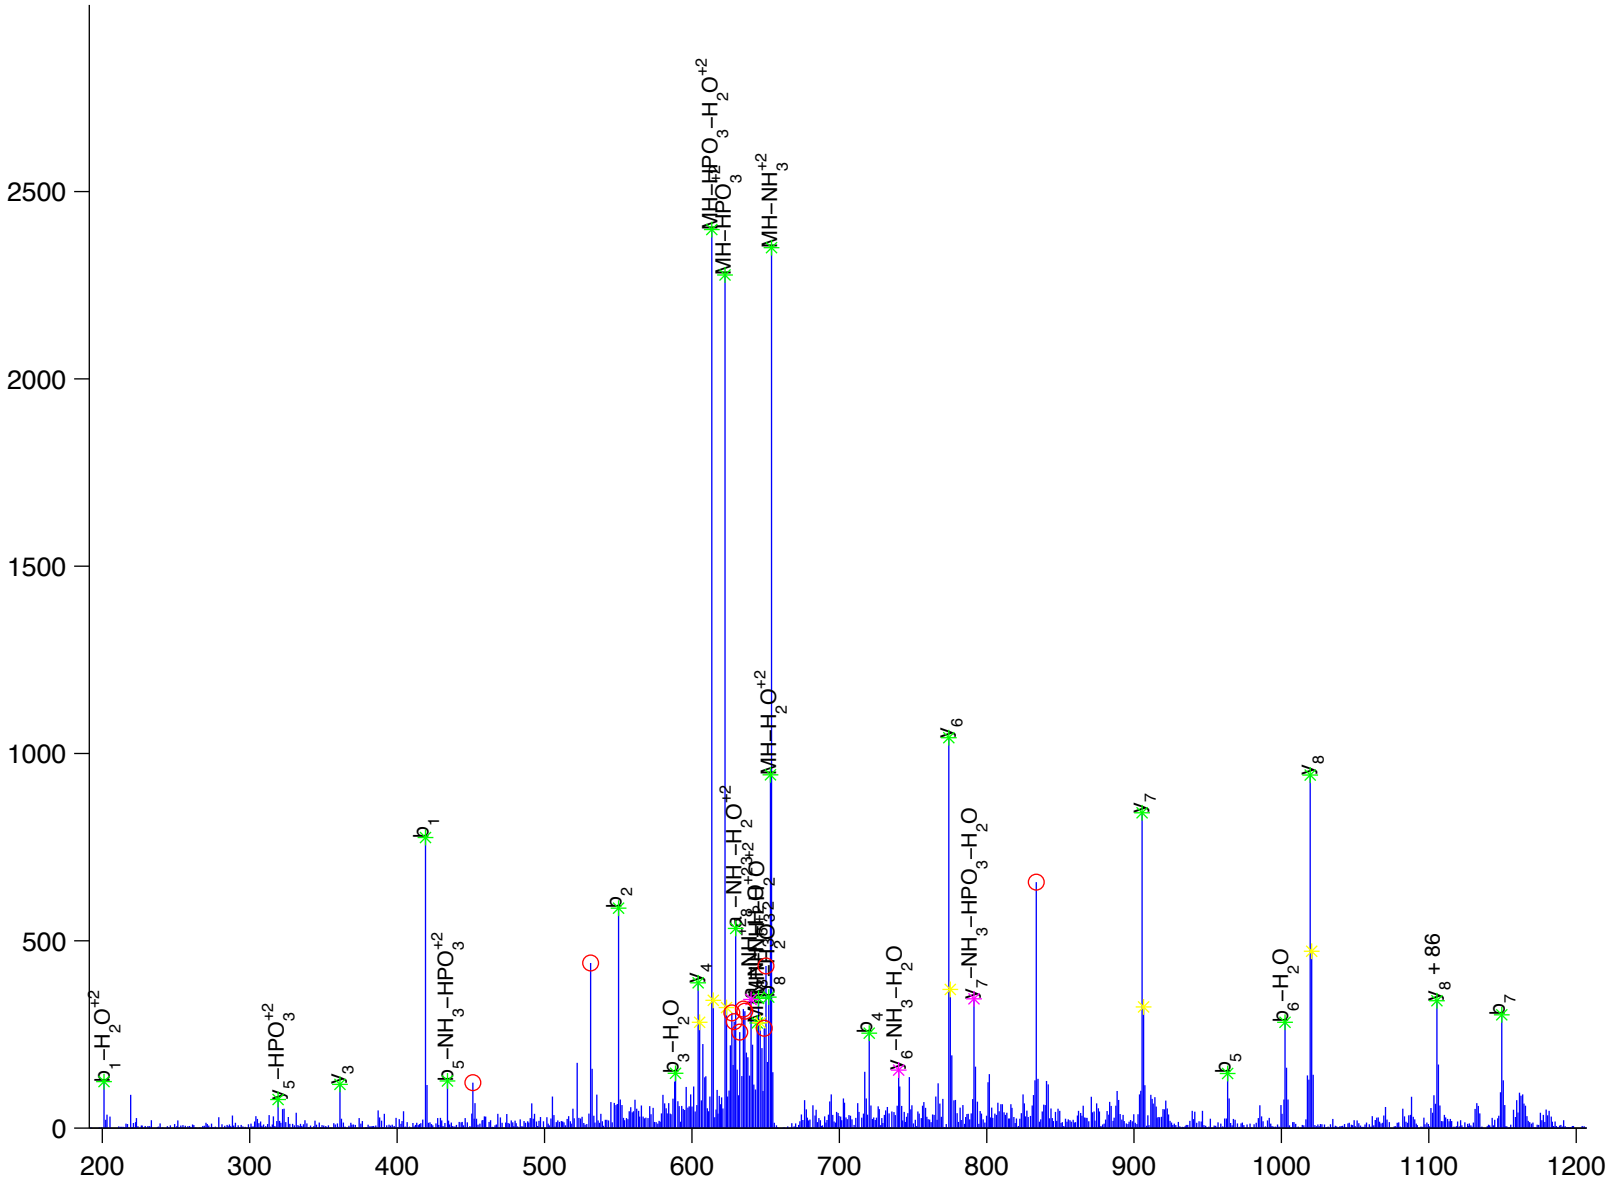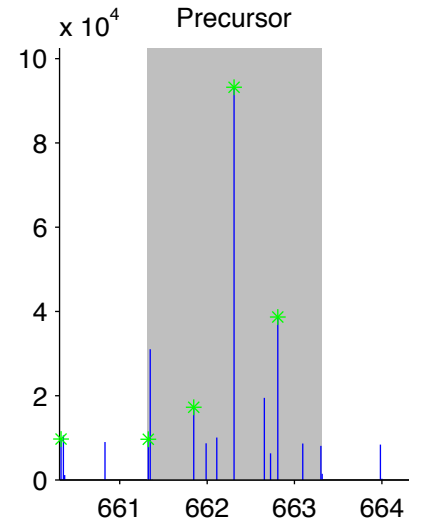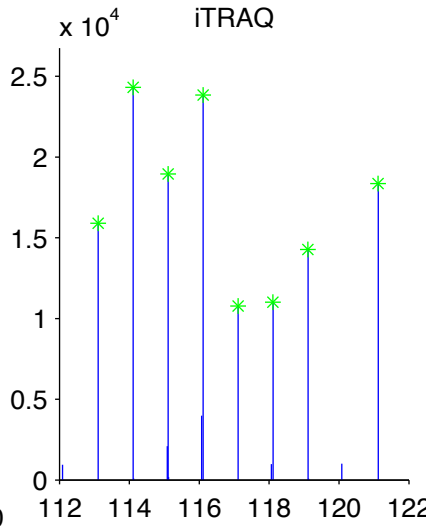



N L D K E y L P I G G L A E F C K

glutamate oxaloacetate transaminase 2, mitochondrial

Charge State: +4

Scan Number: 5402

File Name: 100827ptp1blivers\_ncHFD\_basal.raw

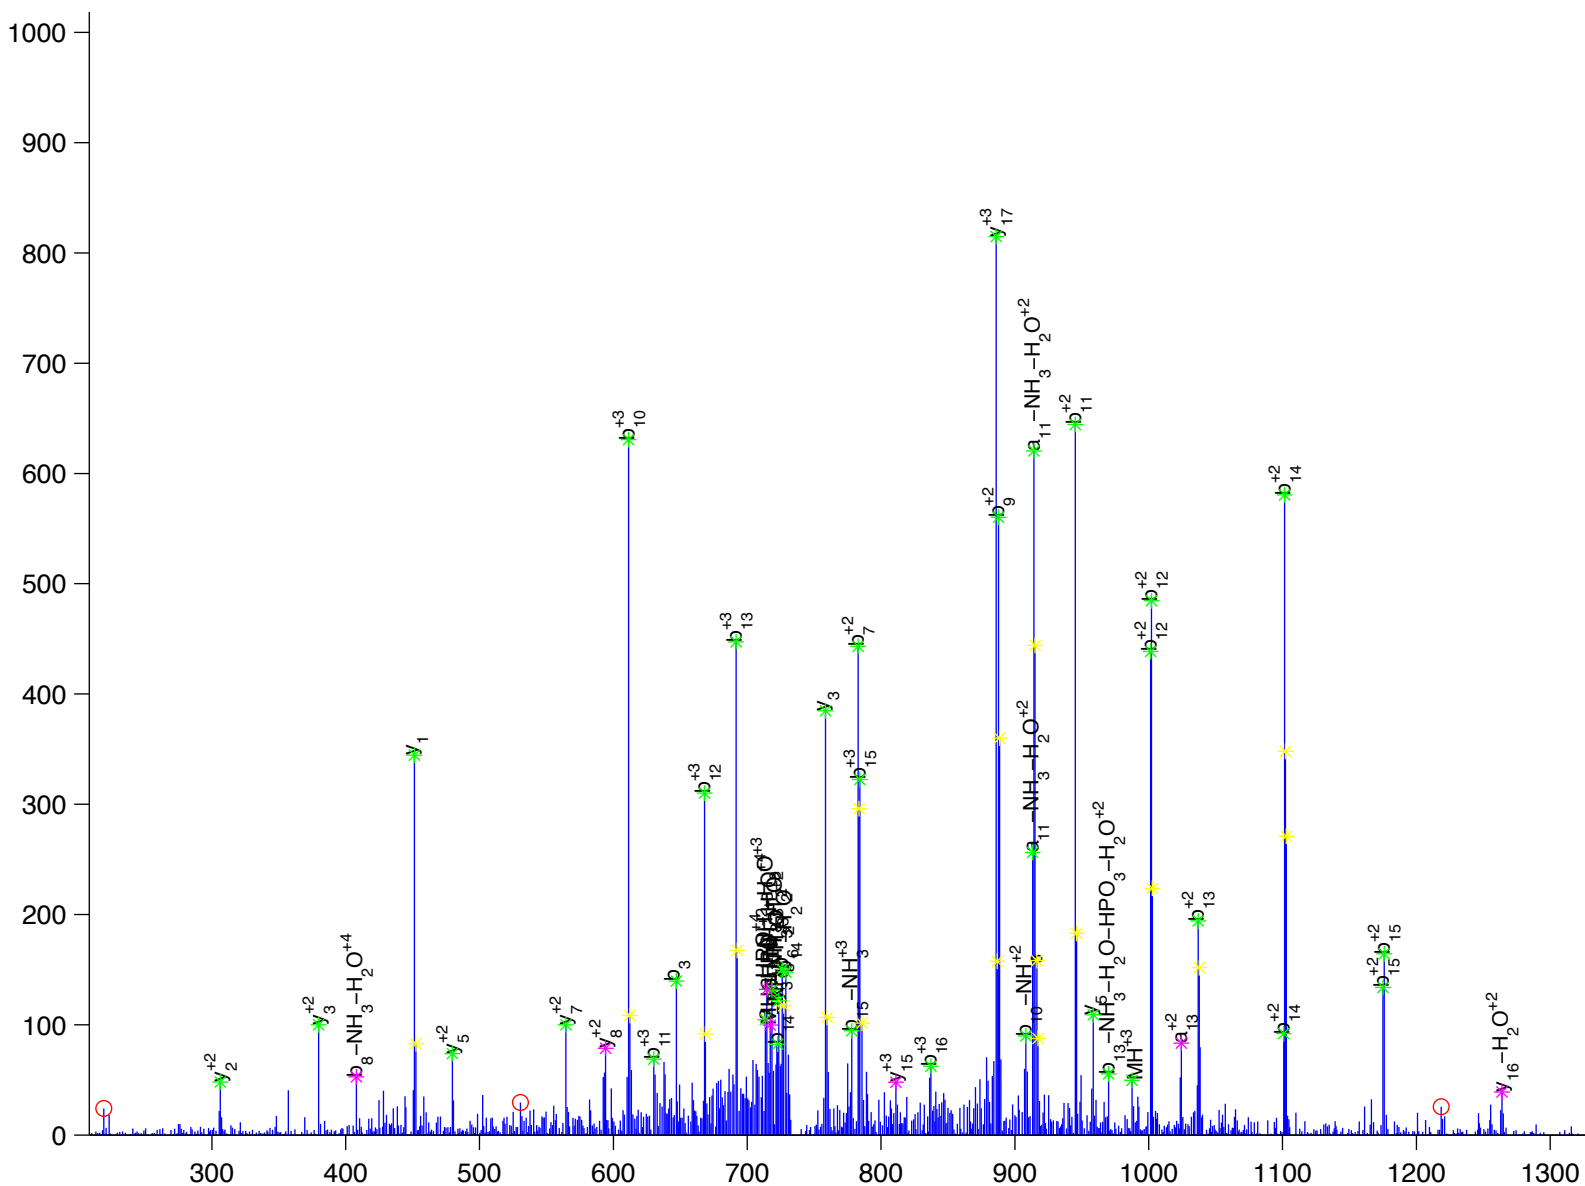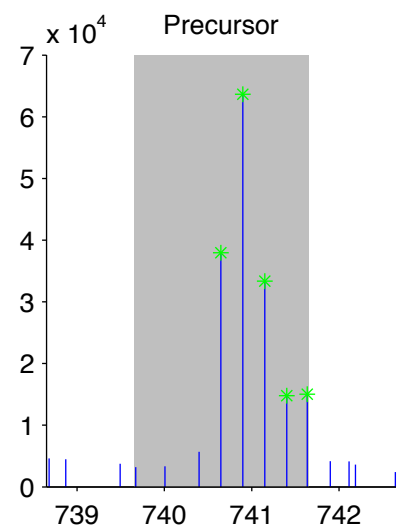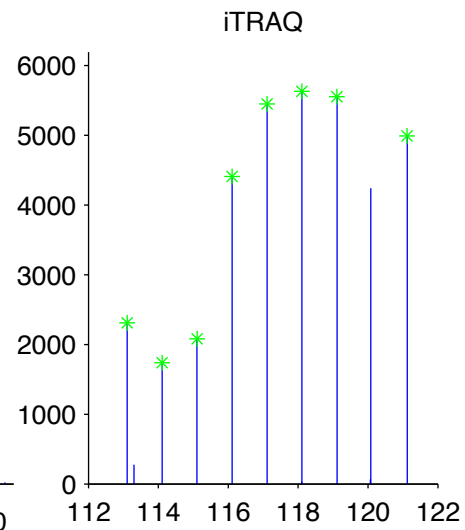

G [ y ] F [ E ] D [ R ]

glutamine synthetase

Charge State: +2

Scan Number: 3281

File Name: 100905ptp1blivers\_ncHFD\_basal.raw

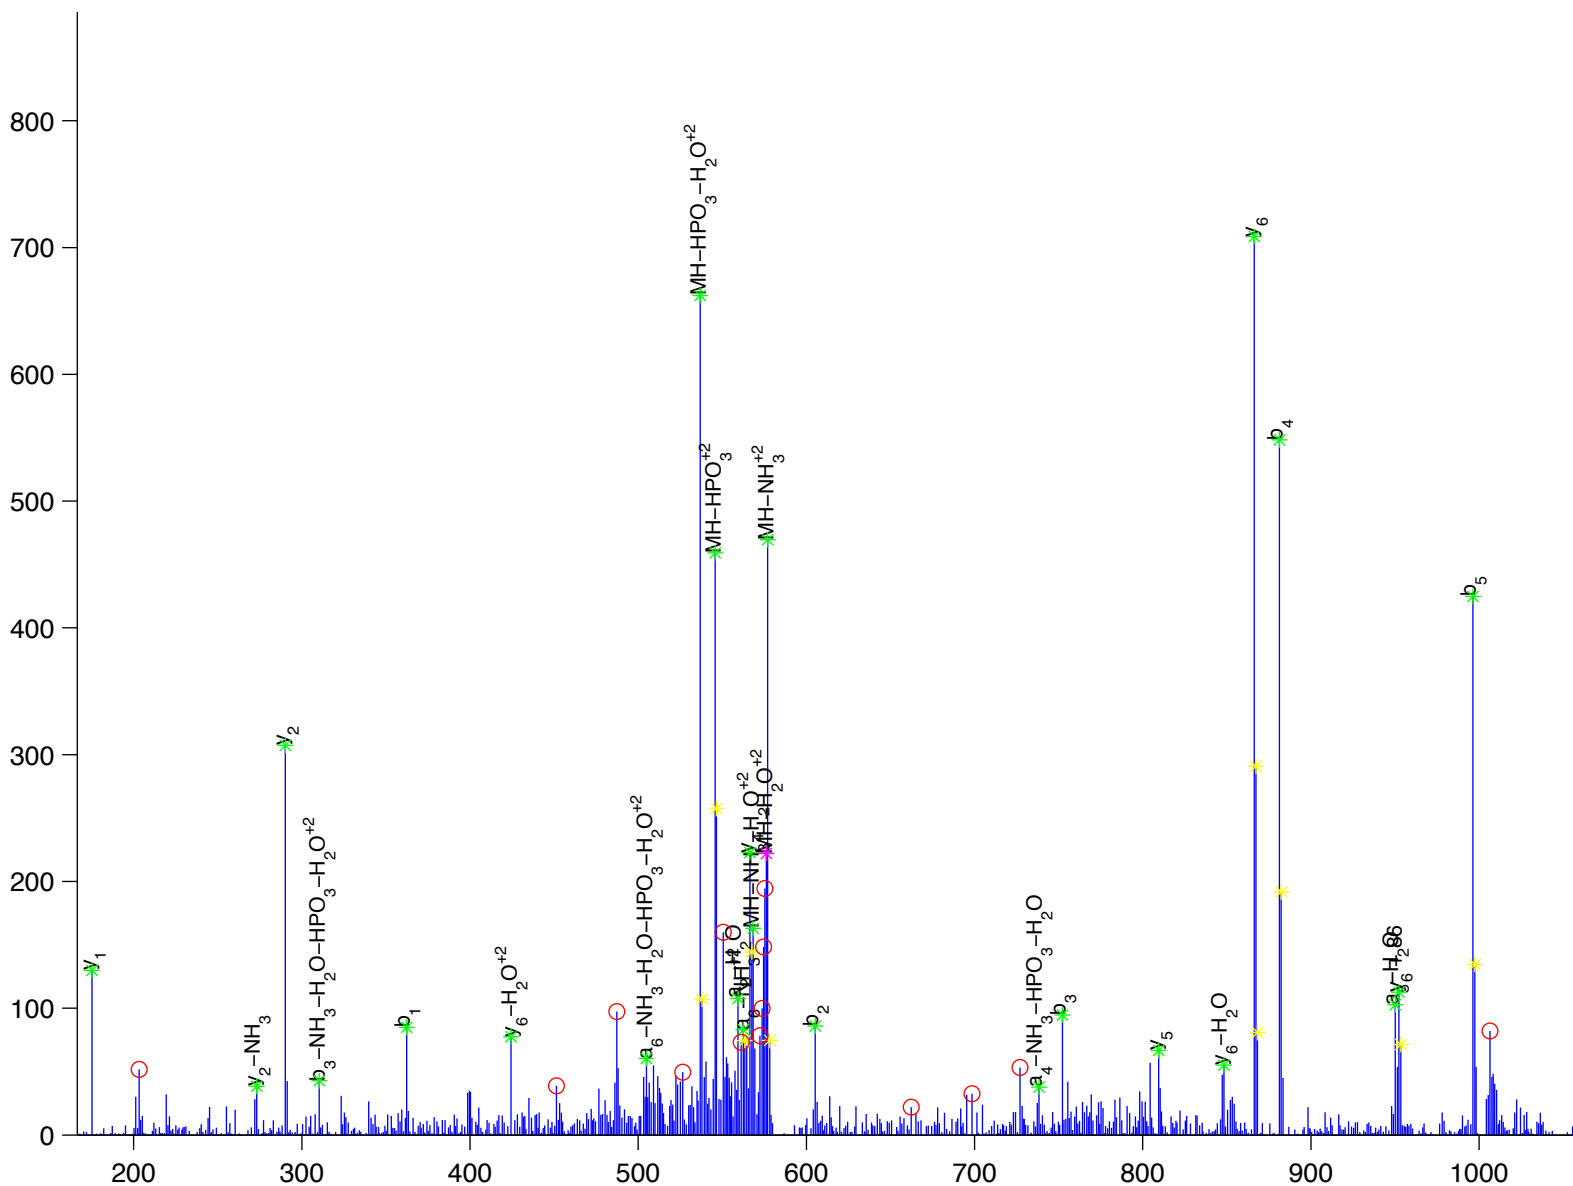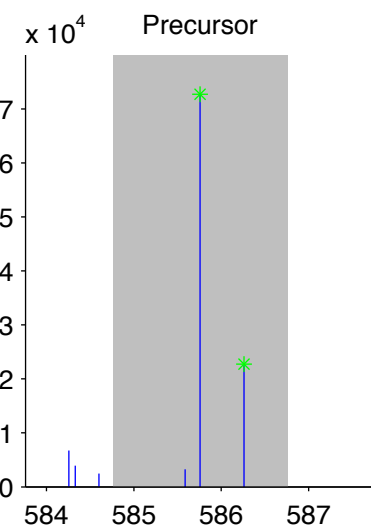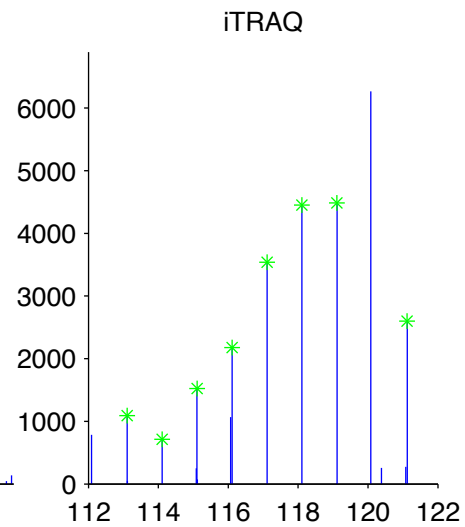

K [ G ] y [ F ] E [ D ] R

glutamine synthetase

Charge State: +3

Scan Number: 4088

File Name: 091130ptp1blivers\_hfd\_basal2.raw

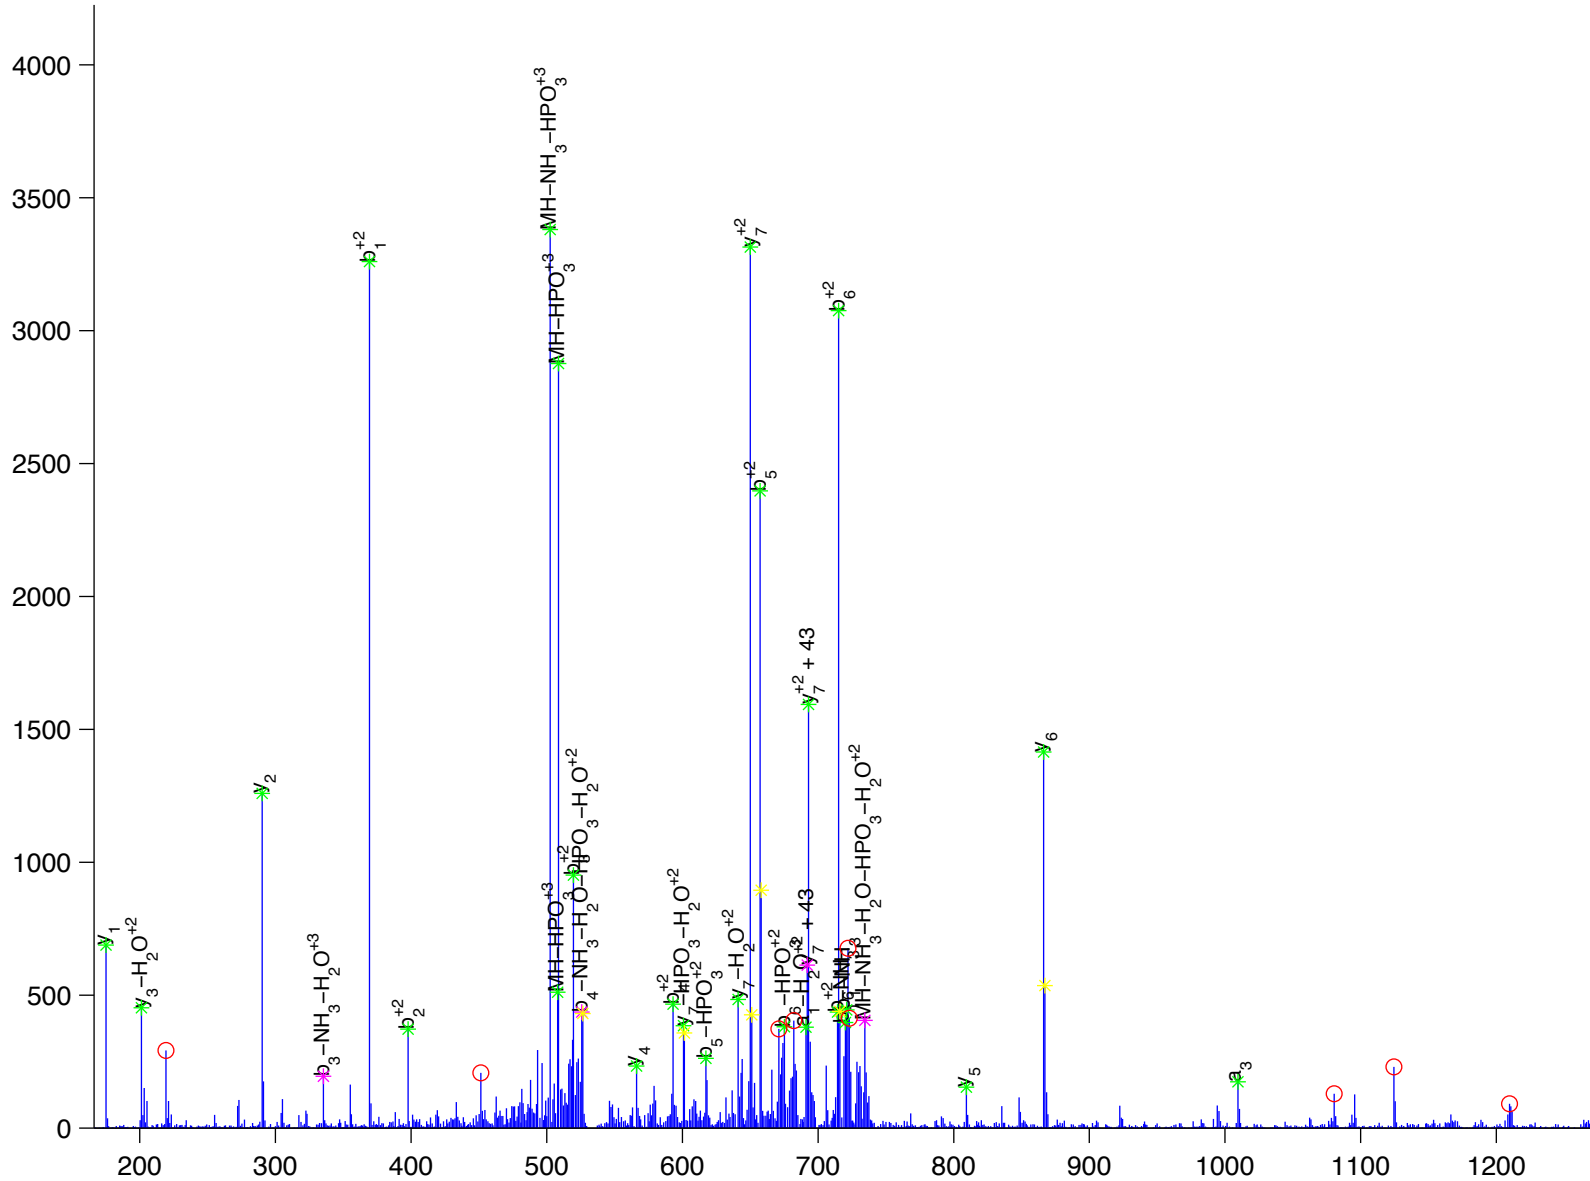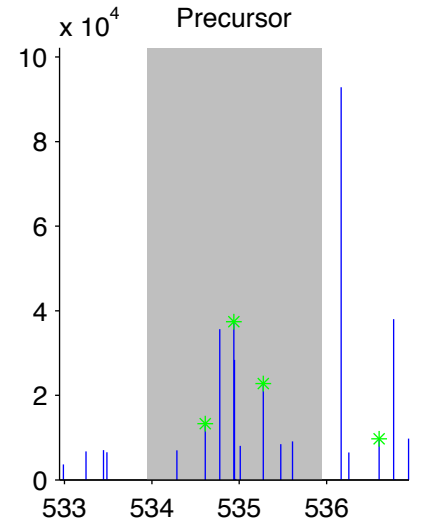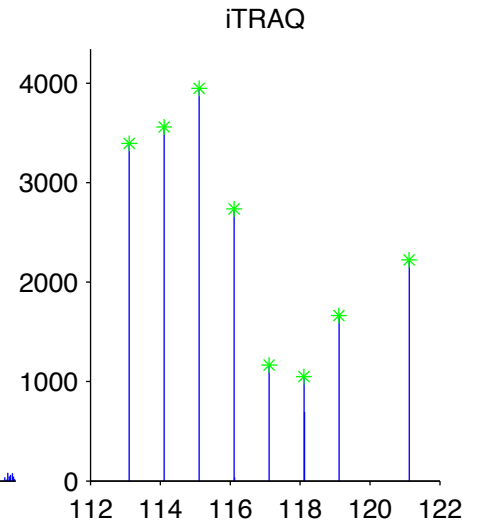

y [ I ] [ I ] [ W ] [ S ] [ P ] [ V ] [ C ] R

glutathione peroxidase 1

Charge State: +2

Scan Number: 3040

File Name: HJ072909\_HFD\_E1\_2.raw

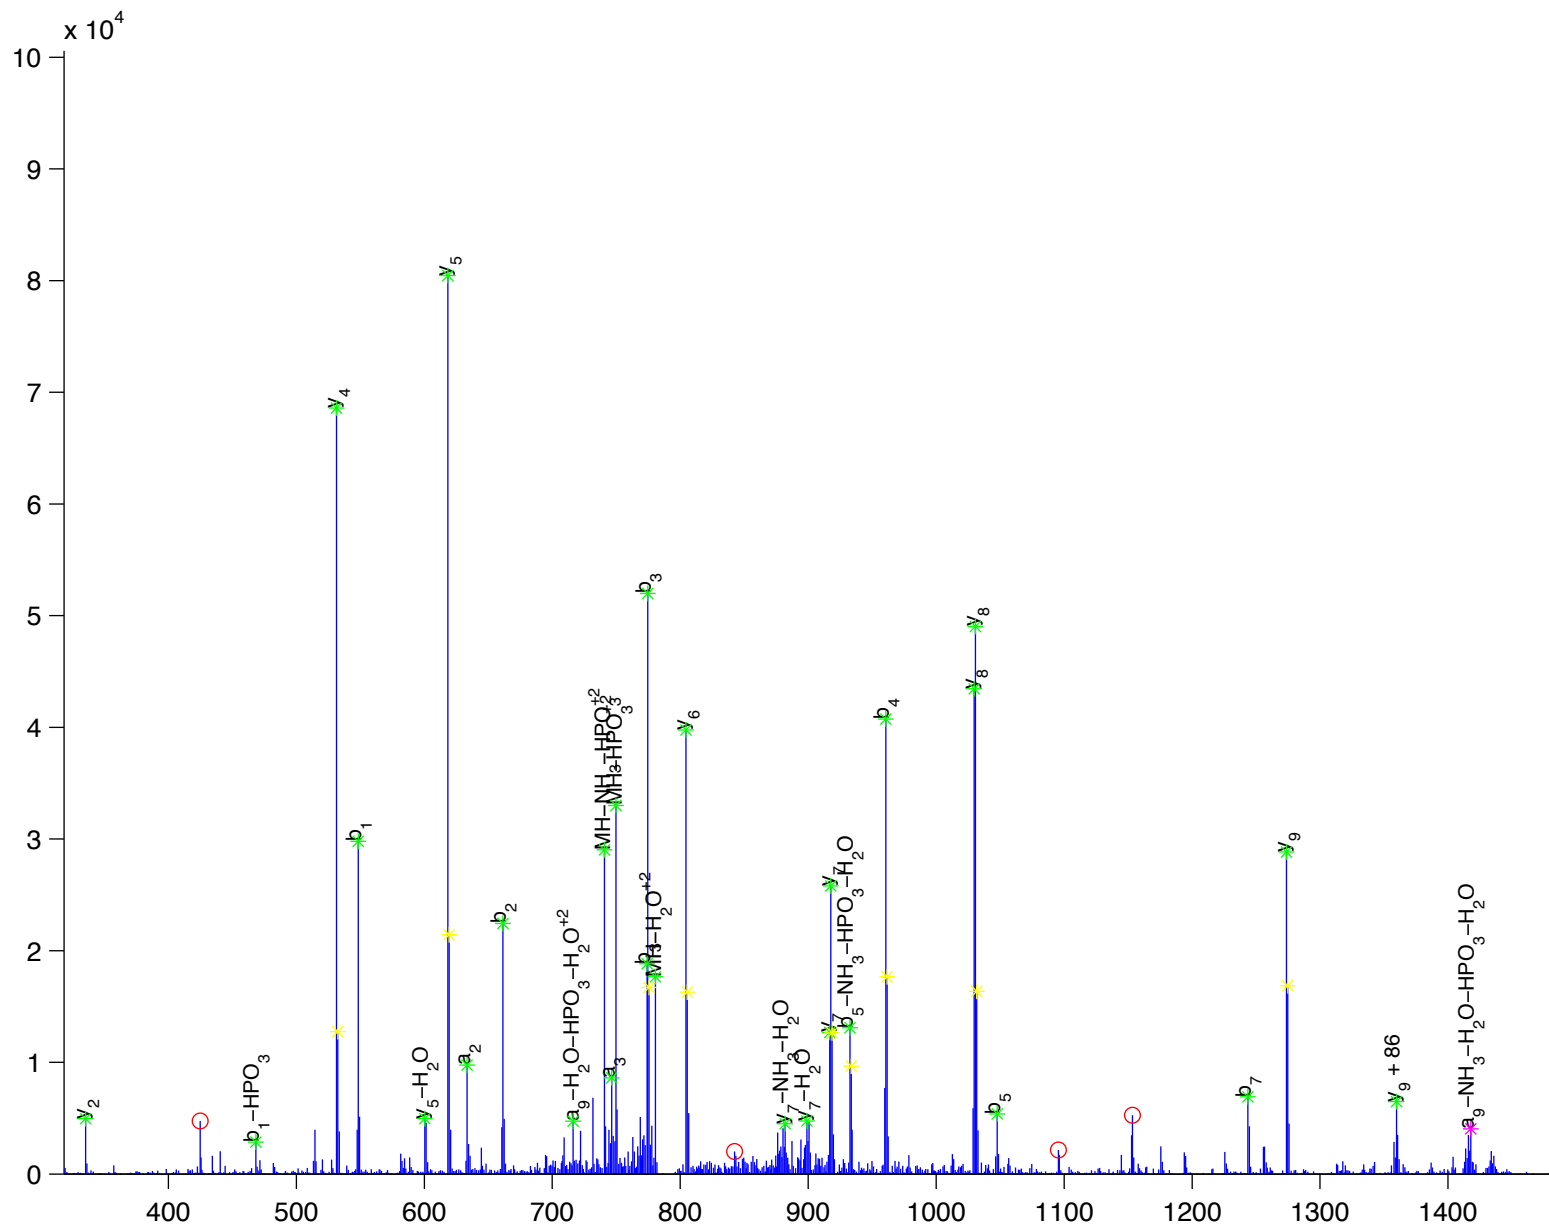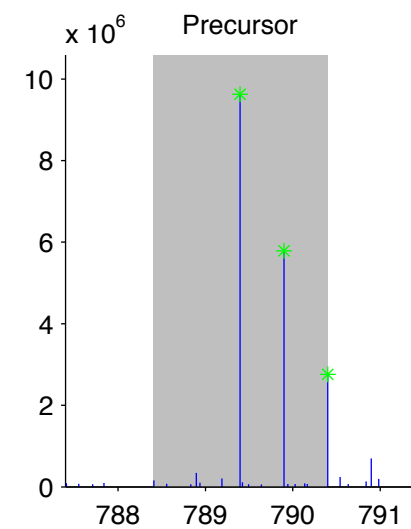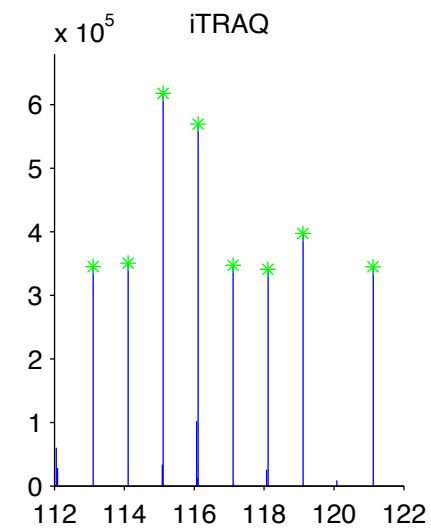

M L L E y T D S S Y D E K

glutathione S-transferase, mu 1

Charge State: +3

Scan Number: 5171

File Name: 100905ptp1blivers\_ncHFD\_basal.raw

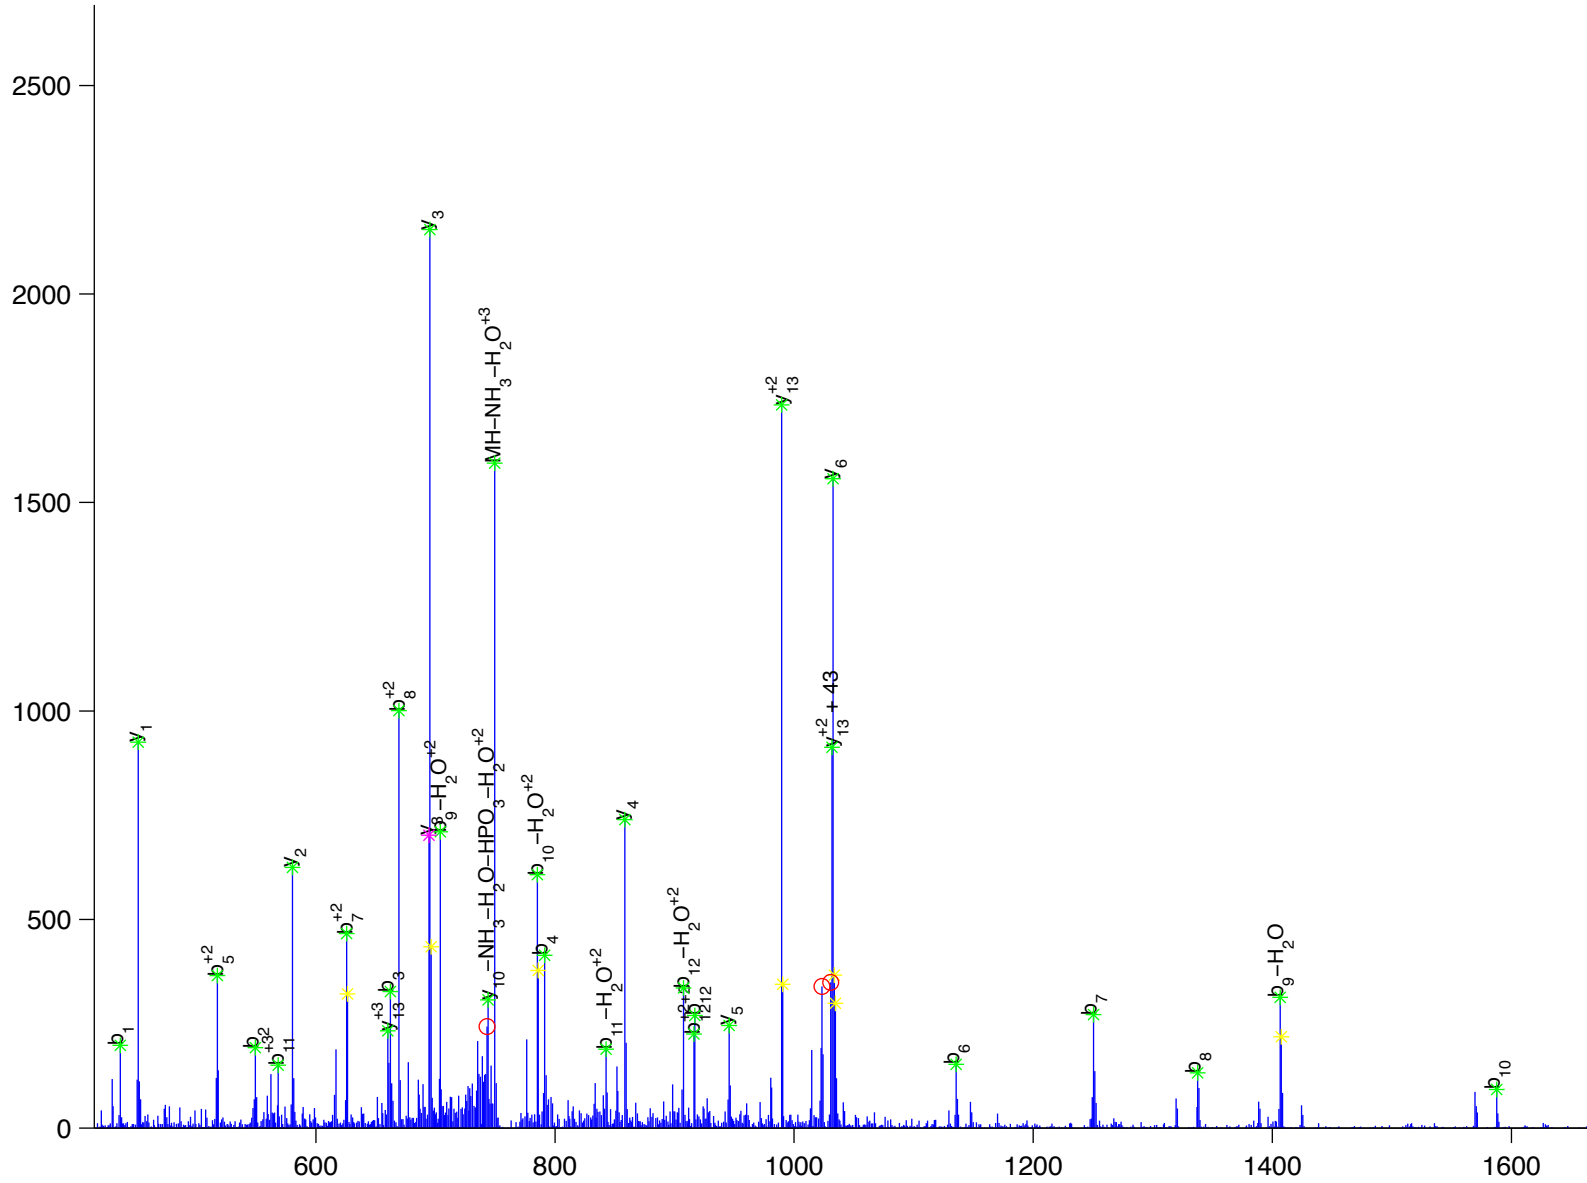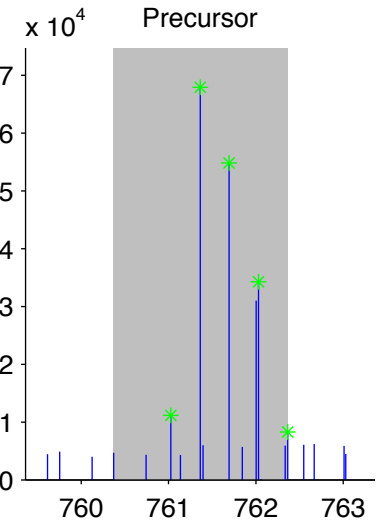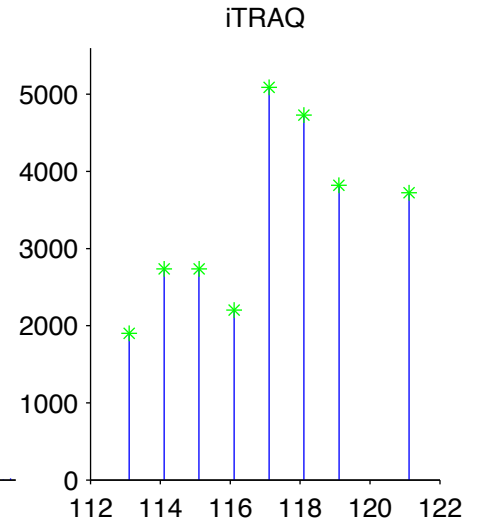

Y [ V ] [ T ] [ L ] [ I ] [ y ] [ T ] [ N ] [ Y ] [ E ] [ N ] [ G ] [ K ]

glutathione S-transferase, pi 1

Charge State: +3

Scan Number: 5881

File Name: 100905ptp1blivers\_ncHFD\_basal.raw

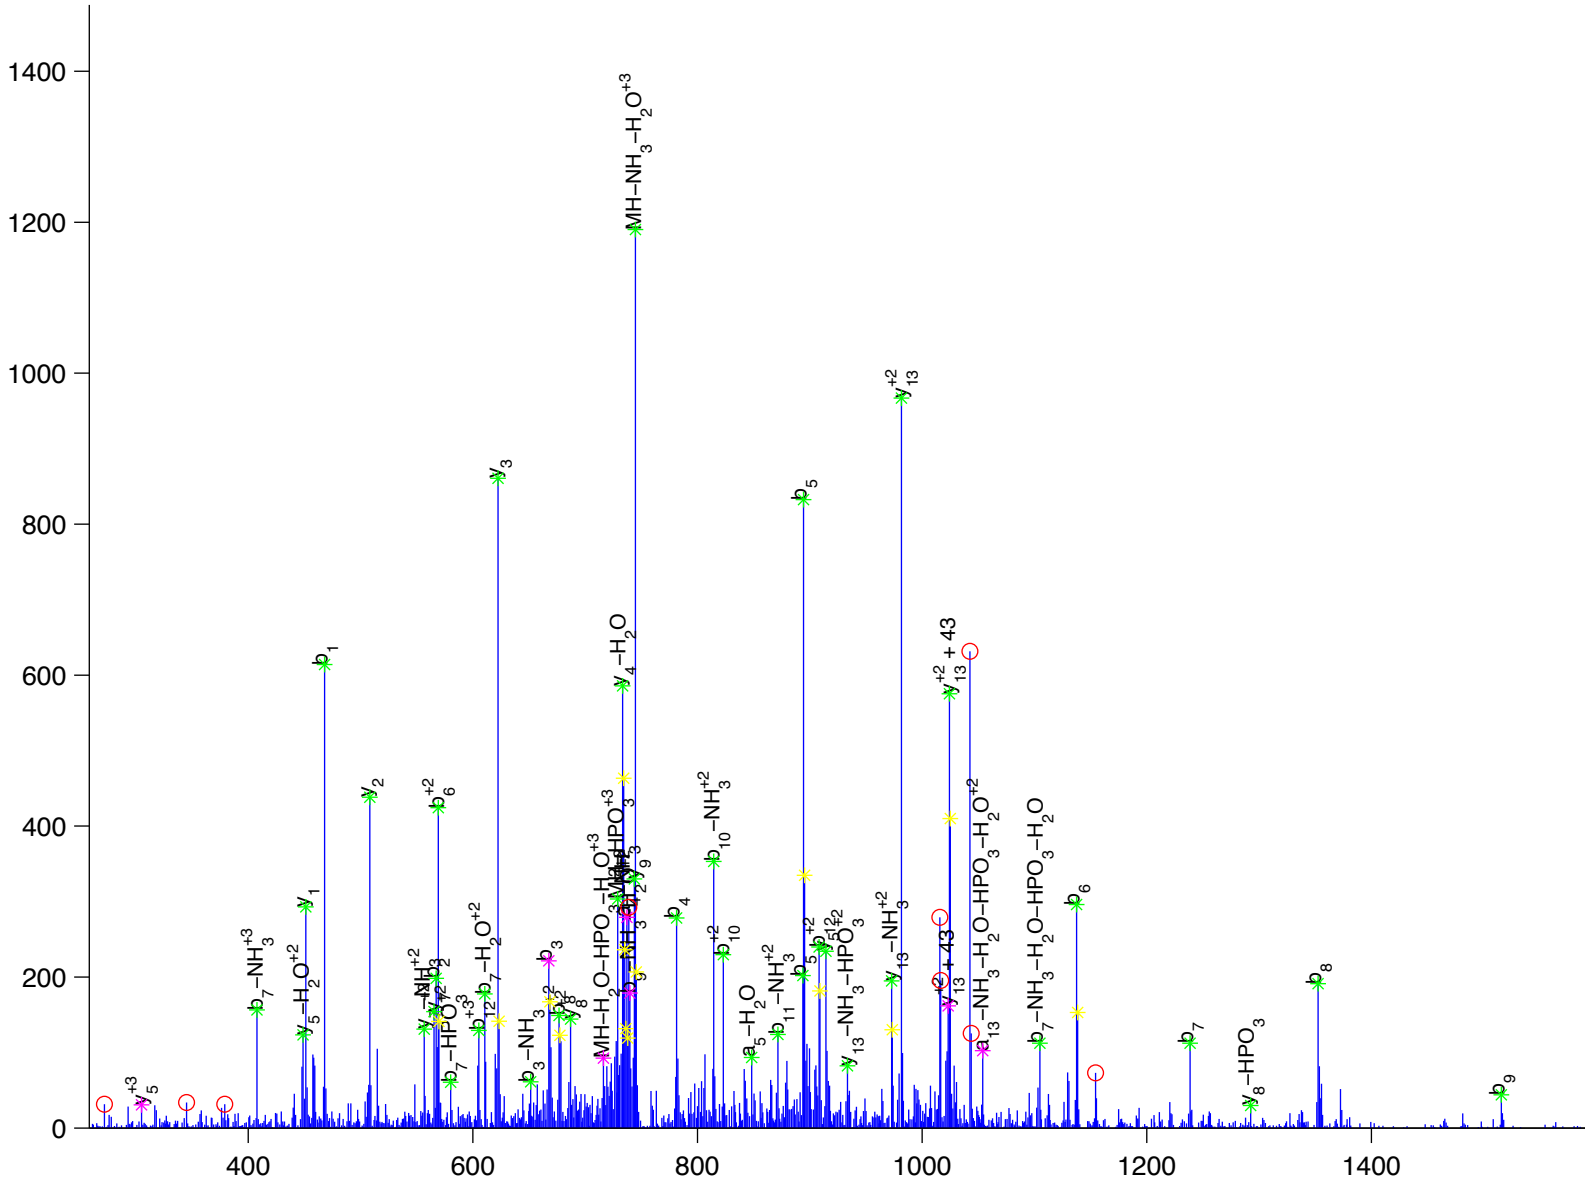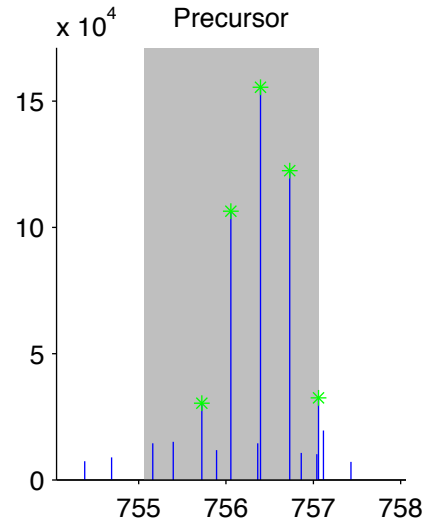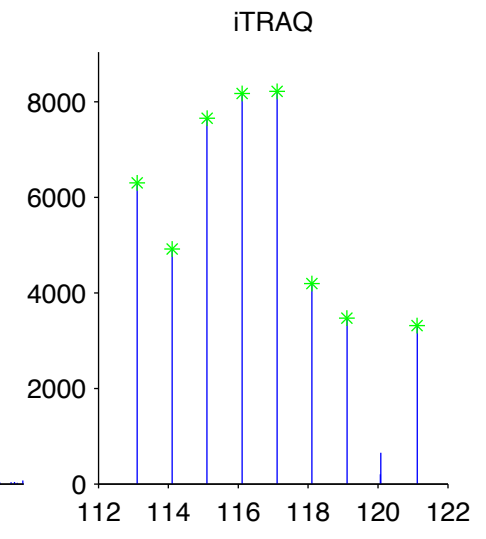

F [ E ] [ D ] [ G ] [ D ] [ L ] [ T ] [ L ] y [ Q ] [ S ] [ N ] [ A ] [ I ] [ L ] R

glutathione S-transferase, pi 1

Charge State: +3

Scan Number: 6412

File Name: 100611ptp1blivers\_nc\_basal.raw

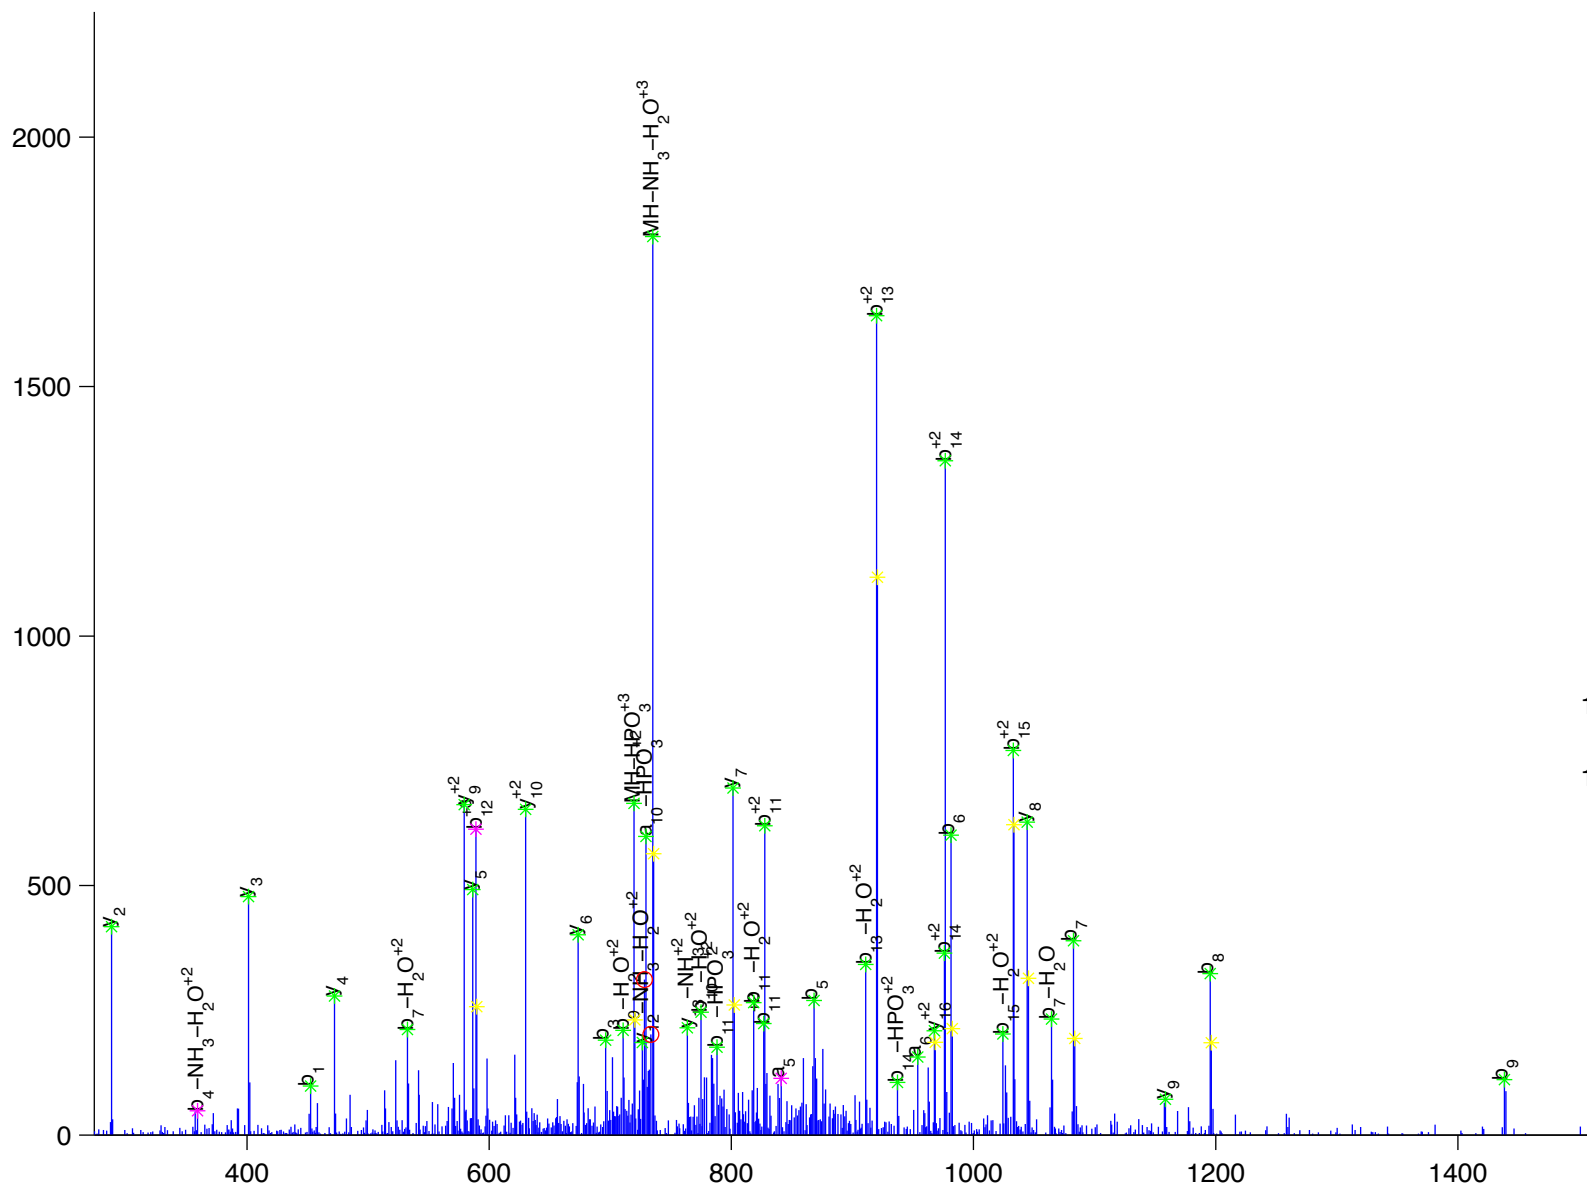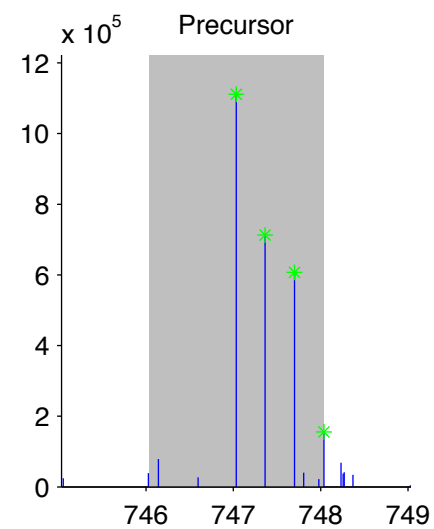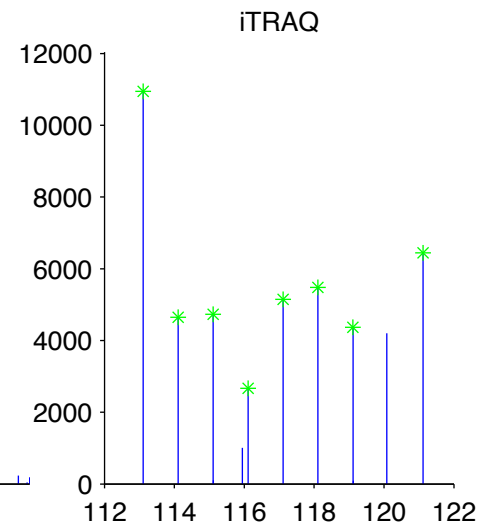

L I S W Y D N E y G Y S N R

glyceraldehyde-3-phosphate dehydrogenase

Charge State: +3

Scan Number: 5729

File Name: 100908ptp1blivers\_ncHFD3\_basal.raw

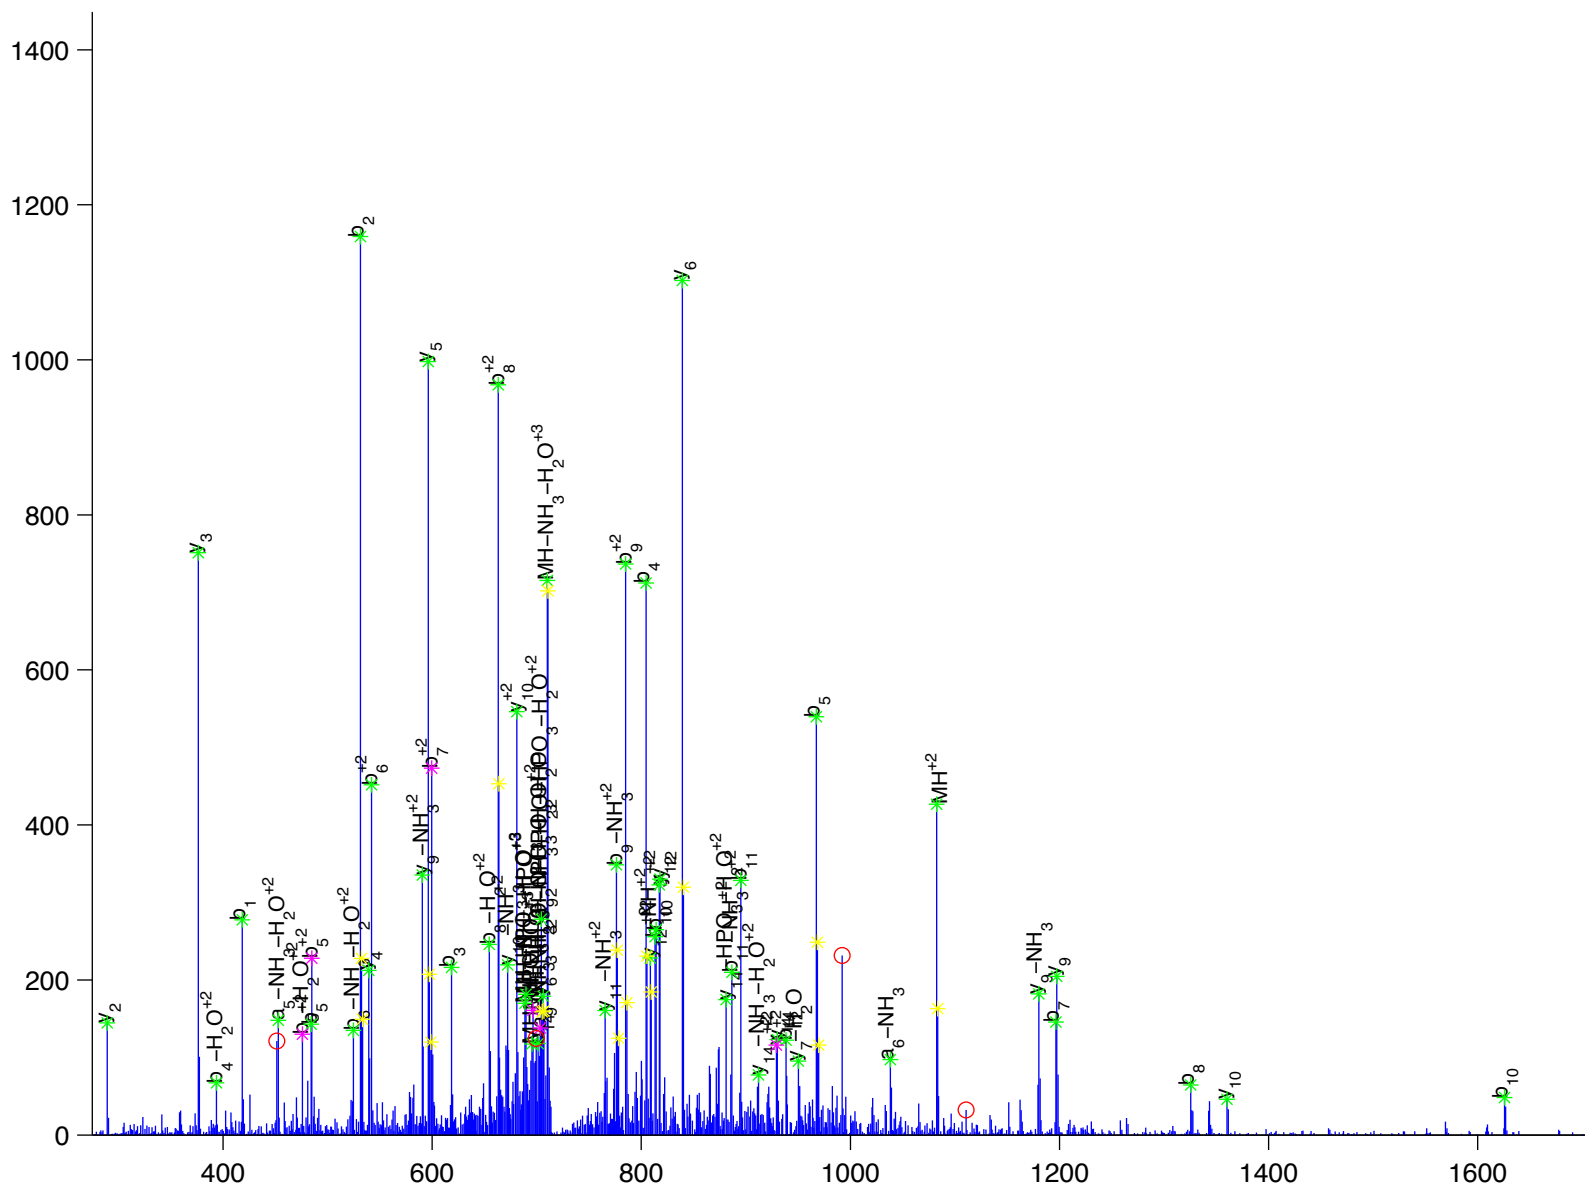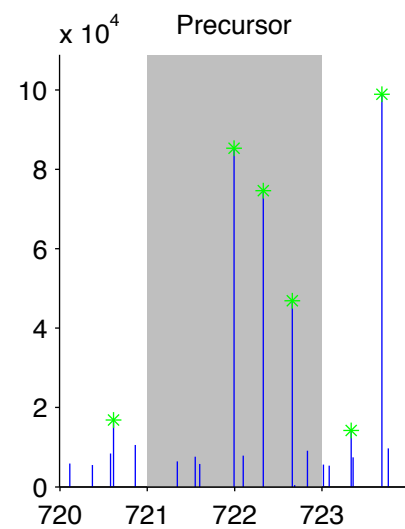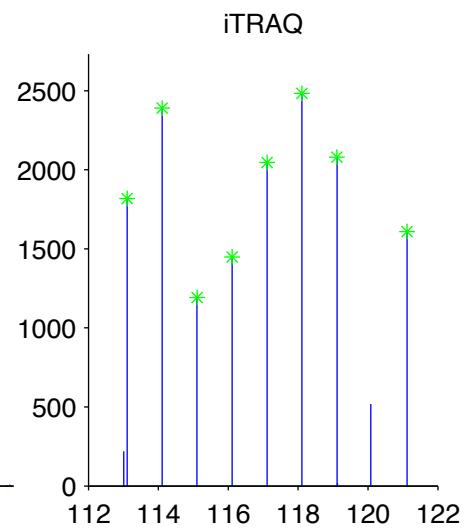



V V D L M A y M A S K

glyceraldehyde-3-phosphate dehydrogenase

Charge State: +3

Scan Number: 9773

File Name: 091130ptp1blivers\_hfd\_basal2.raw

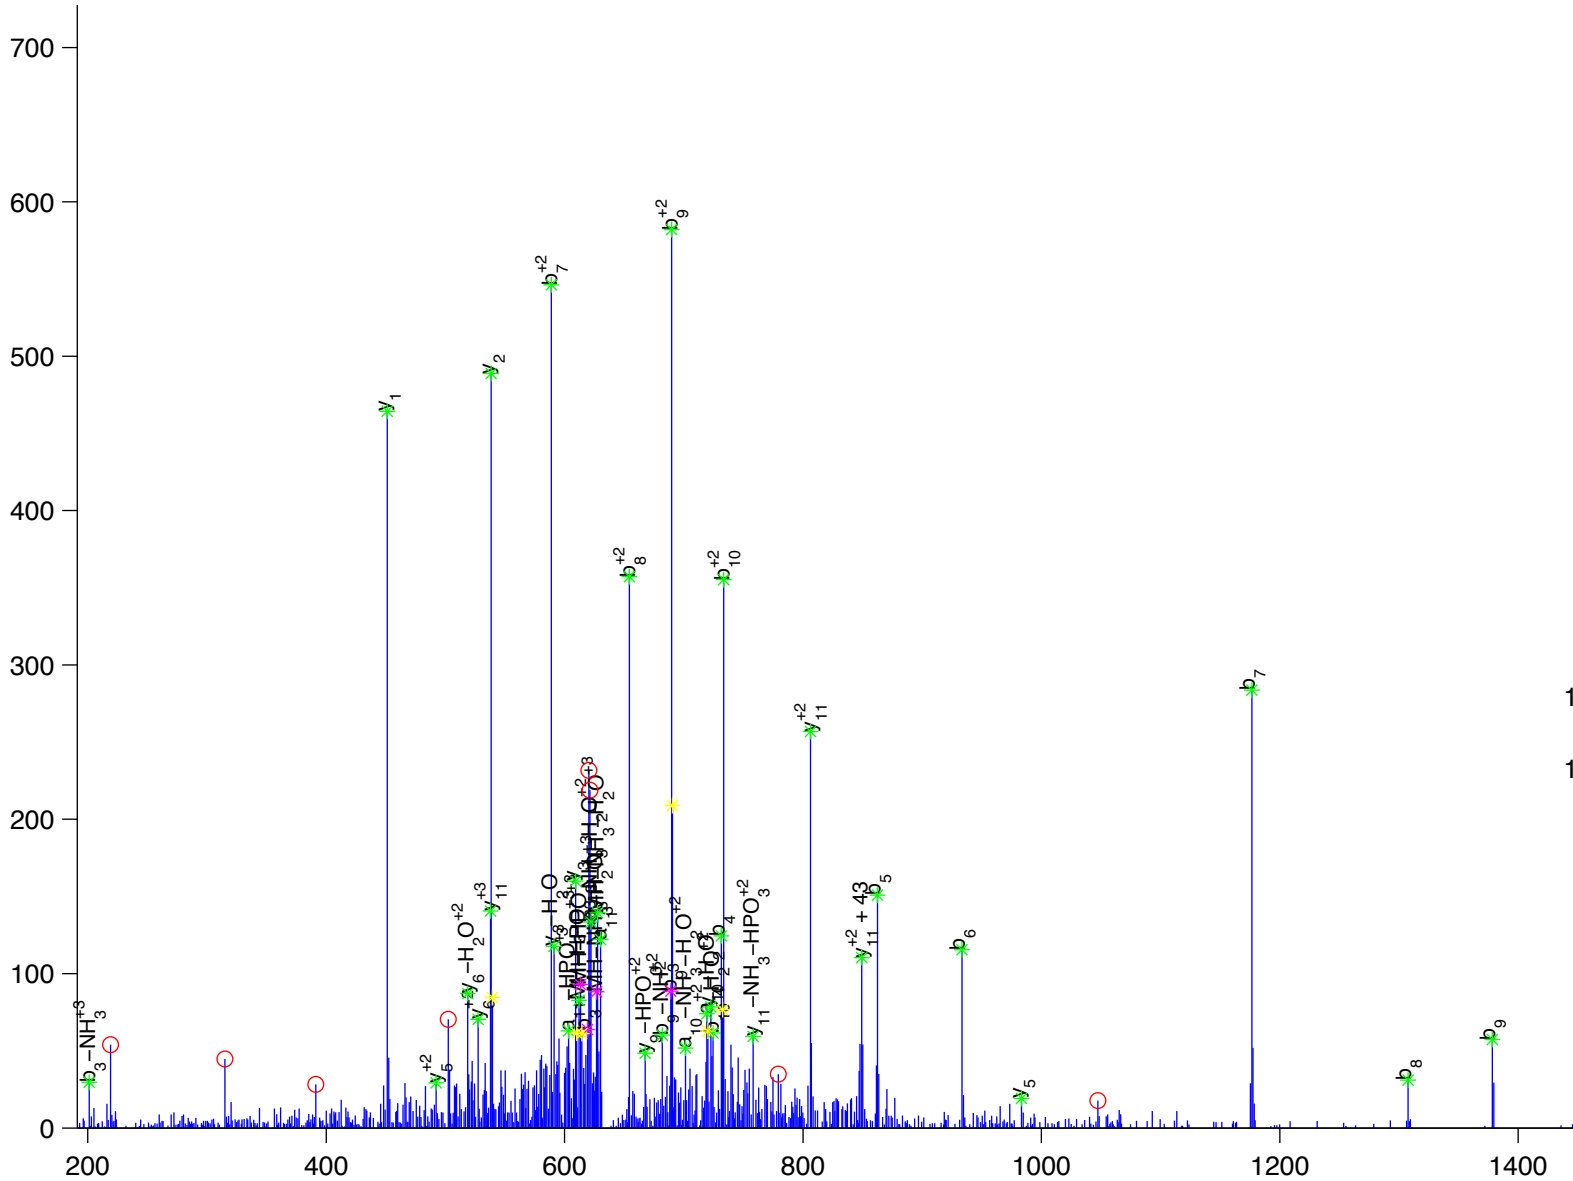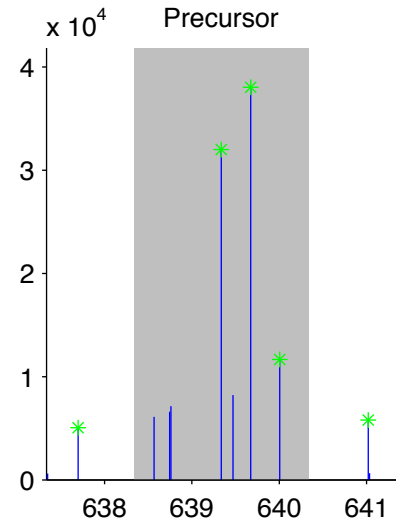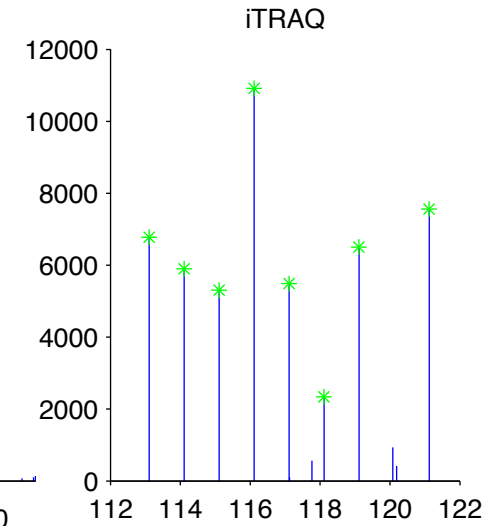

V [ W ] Q [ L ] y [ I ] G [ D ] T [ R ]

glycine N-methyltransferase

Charge State: +3

Scan Number: 5610

File Name: 100908ptp1blivers\_ncHFD3\_basal.raw

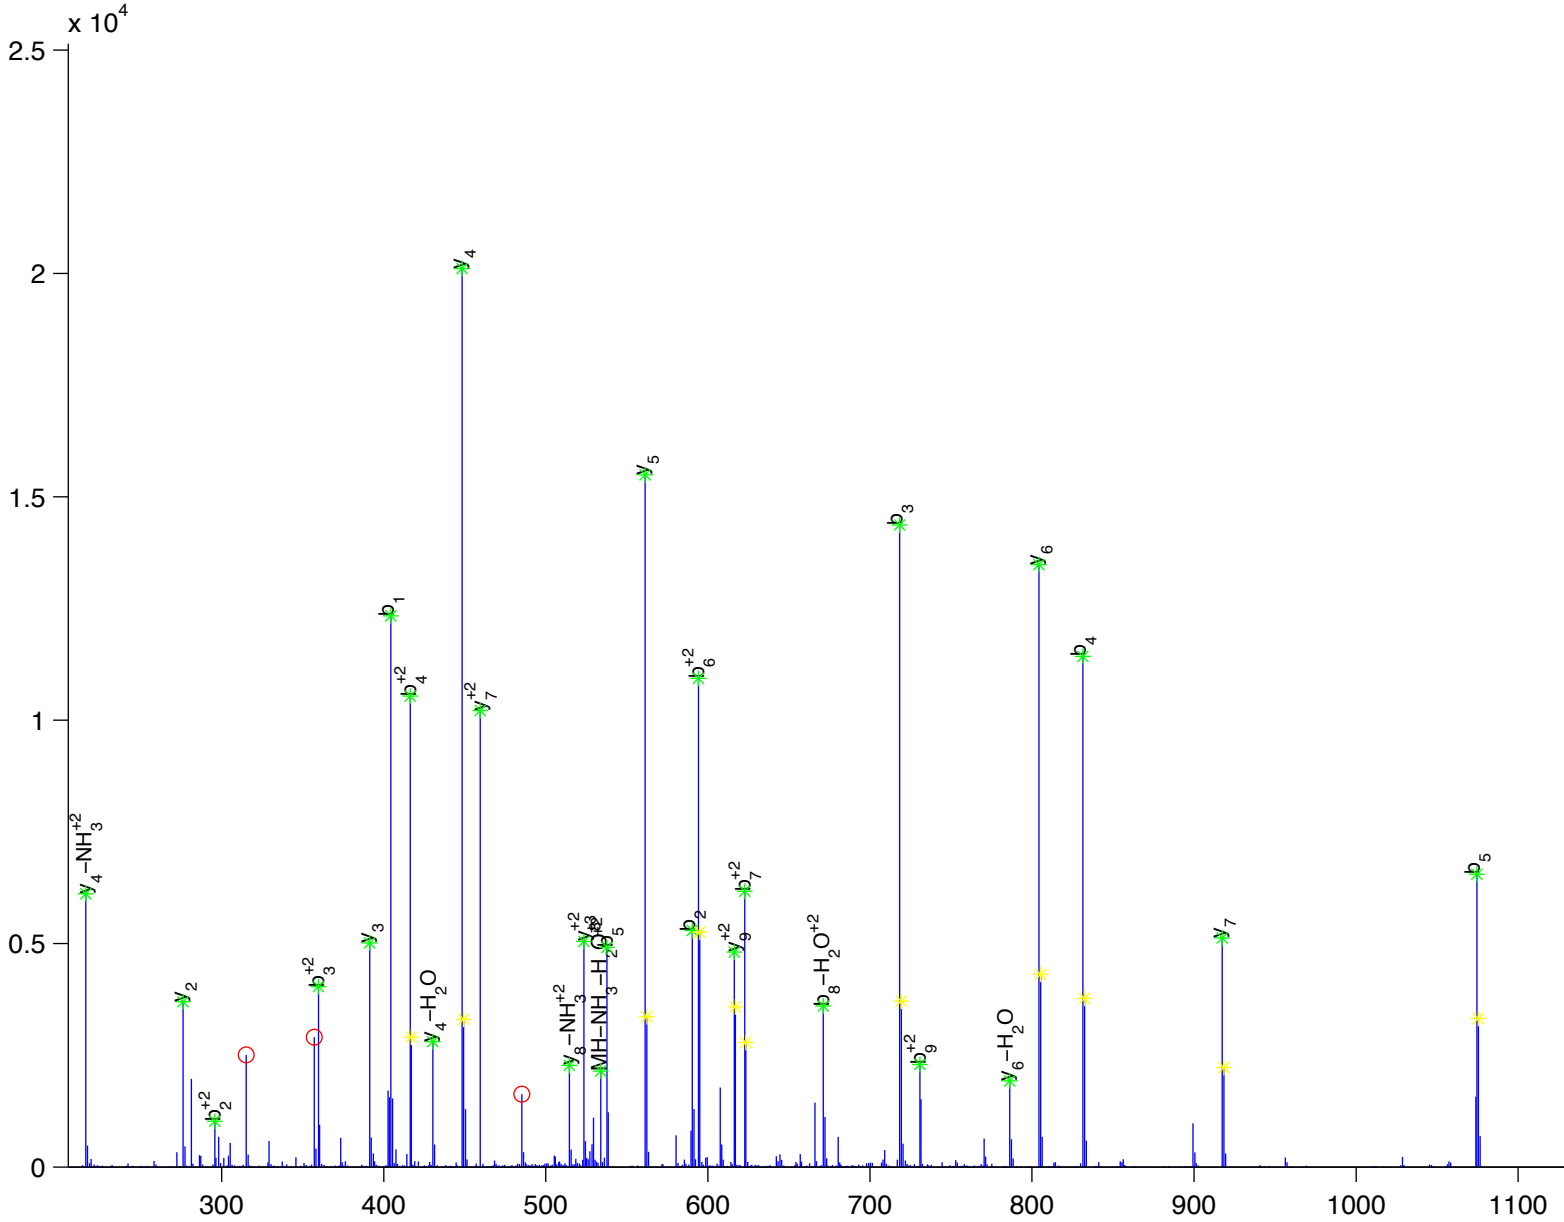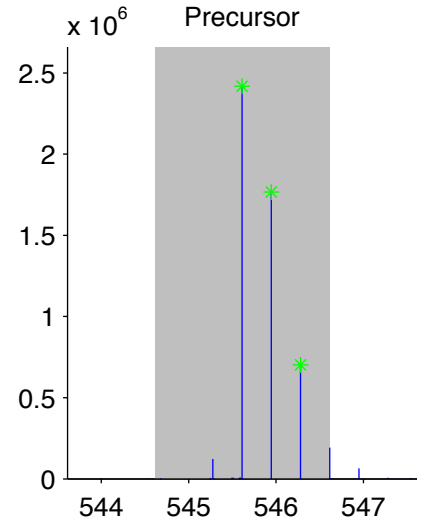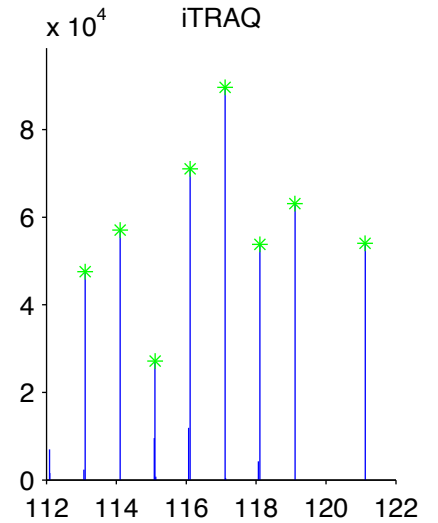

S L G V A A E G L P D Q y A D G E A A R

glycine N-methyltransferase

Charge State: +3

Scan Number: 5728

File Name: 090806ptp1blivers\_M\_NC2.raw

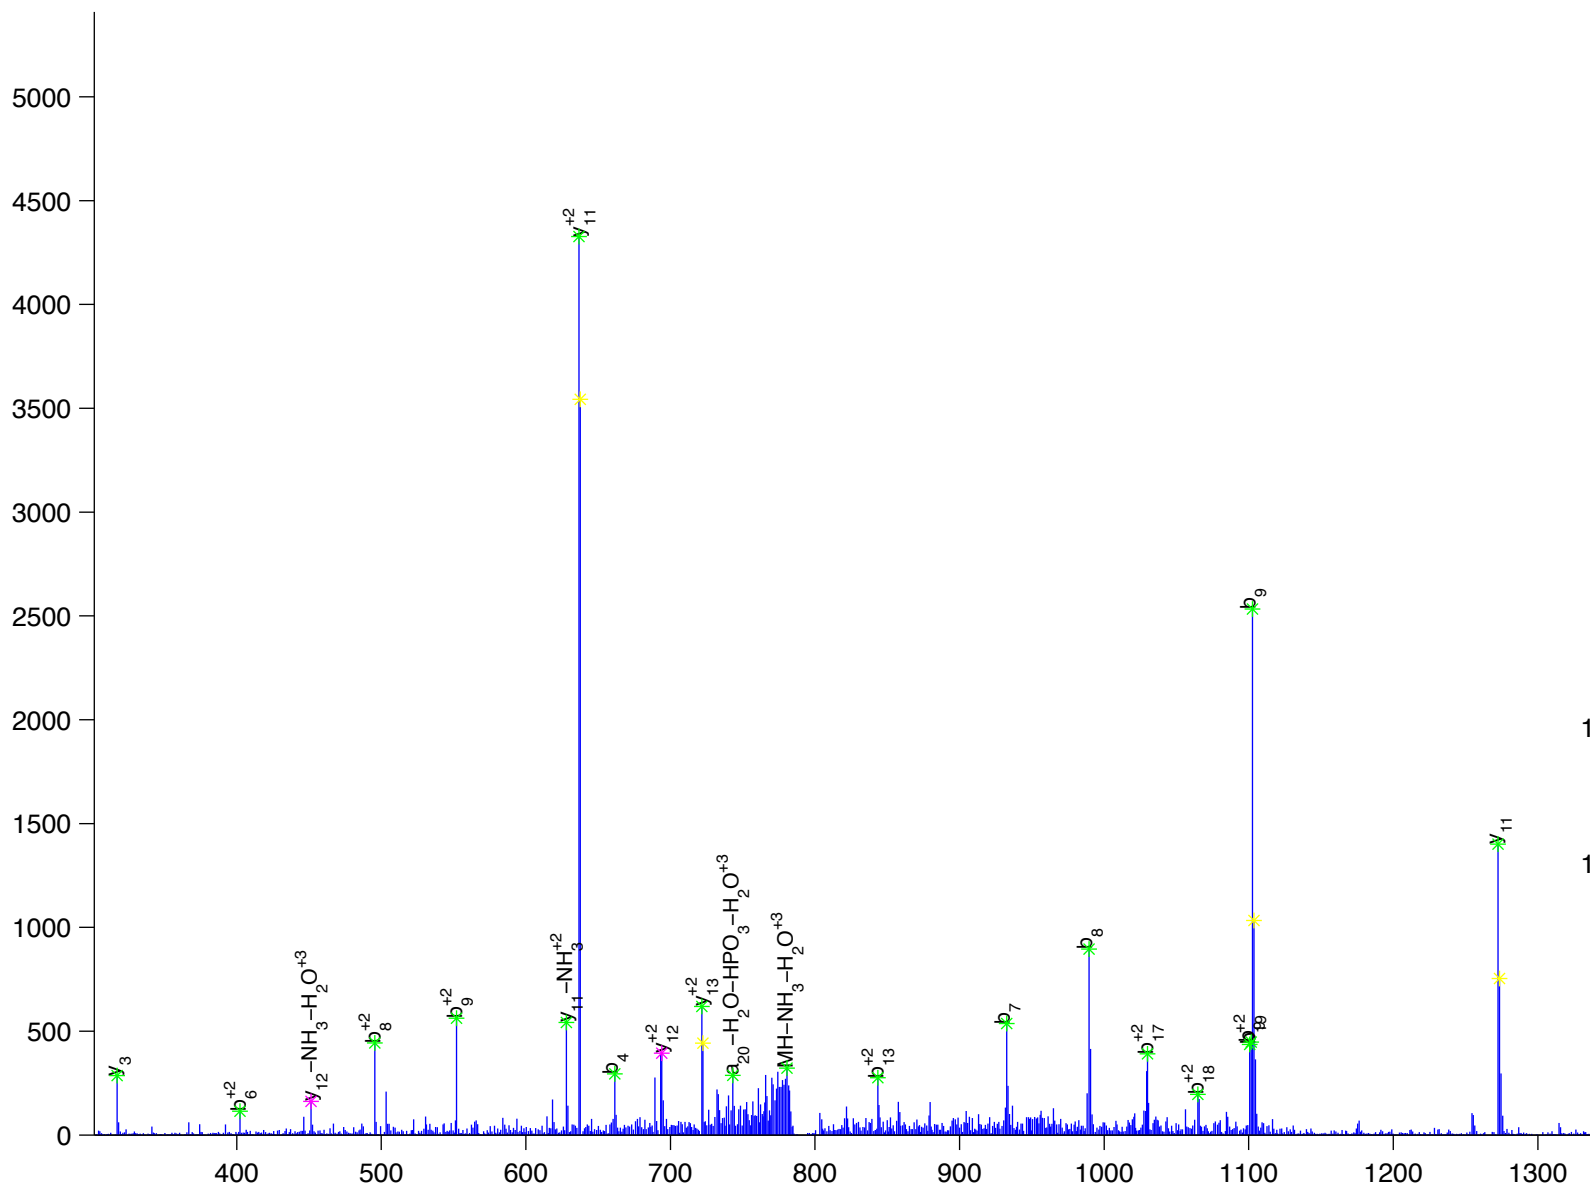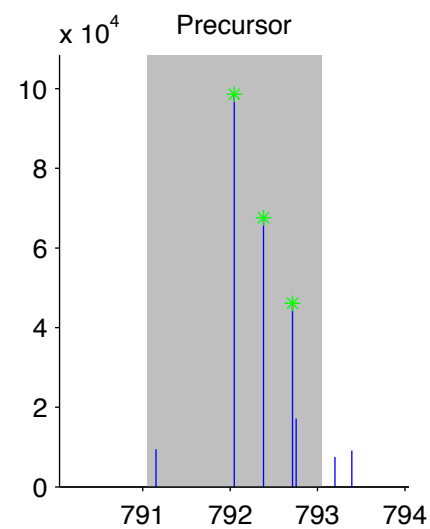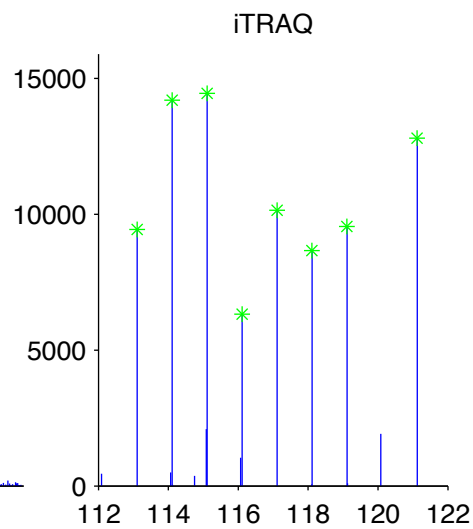

A [H] [M] [V] [T] [L] [D] [y] [T] [V] [Q] [V] [P] [G] [T] [G] [R]

glycine N-methyltransferase

Charge State: +3

Scan Number: 6062

File Name: 090806ptp1blivers\_M\_NC2.raw

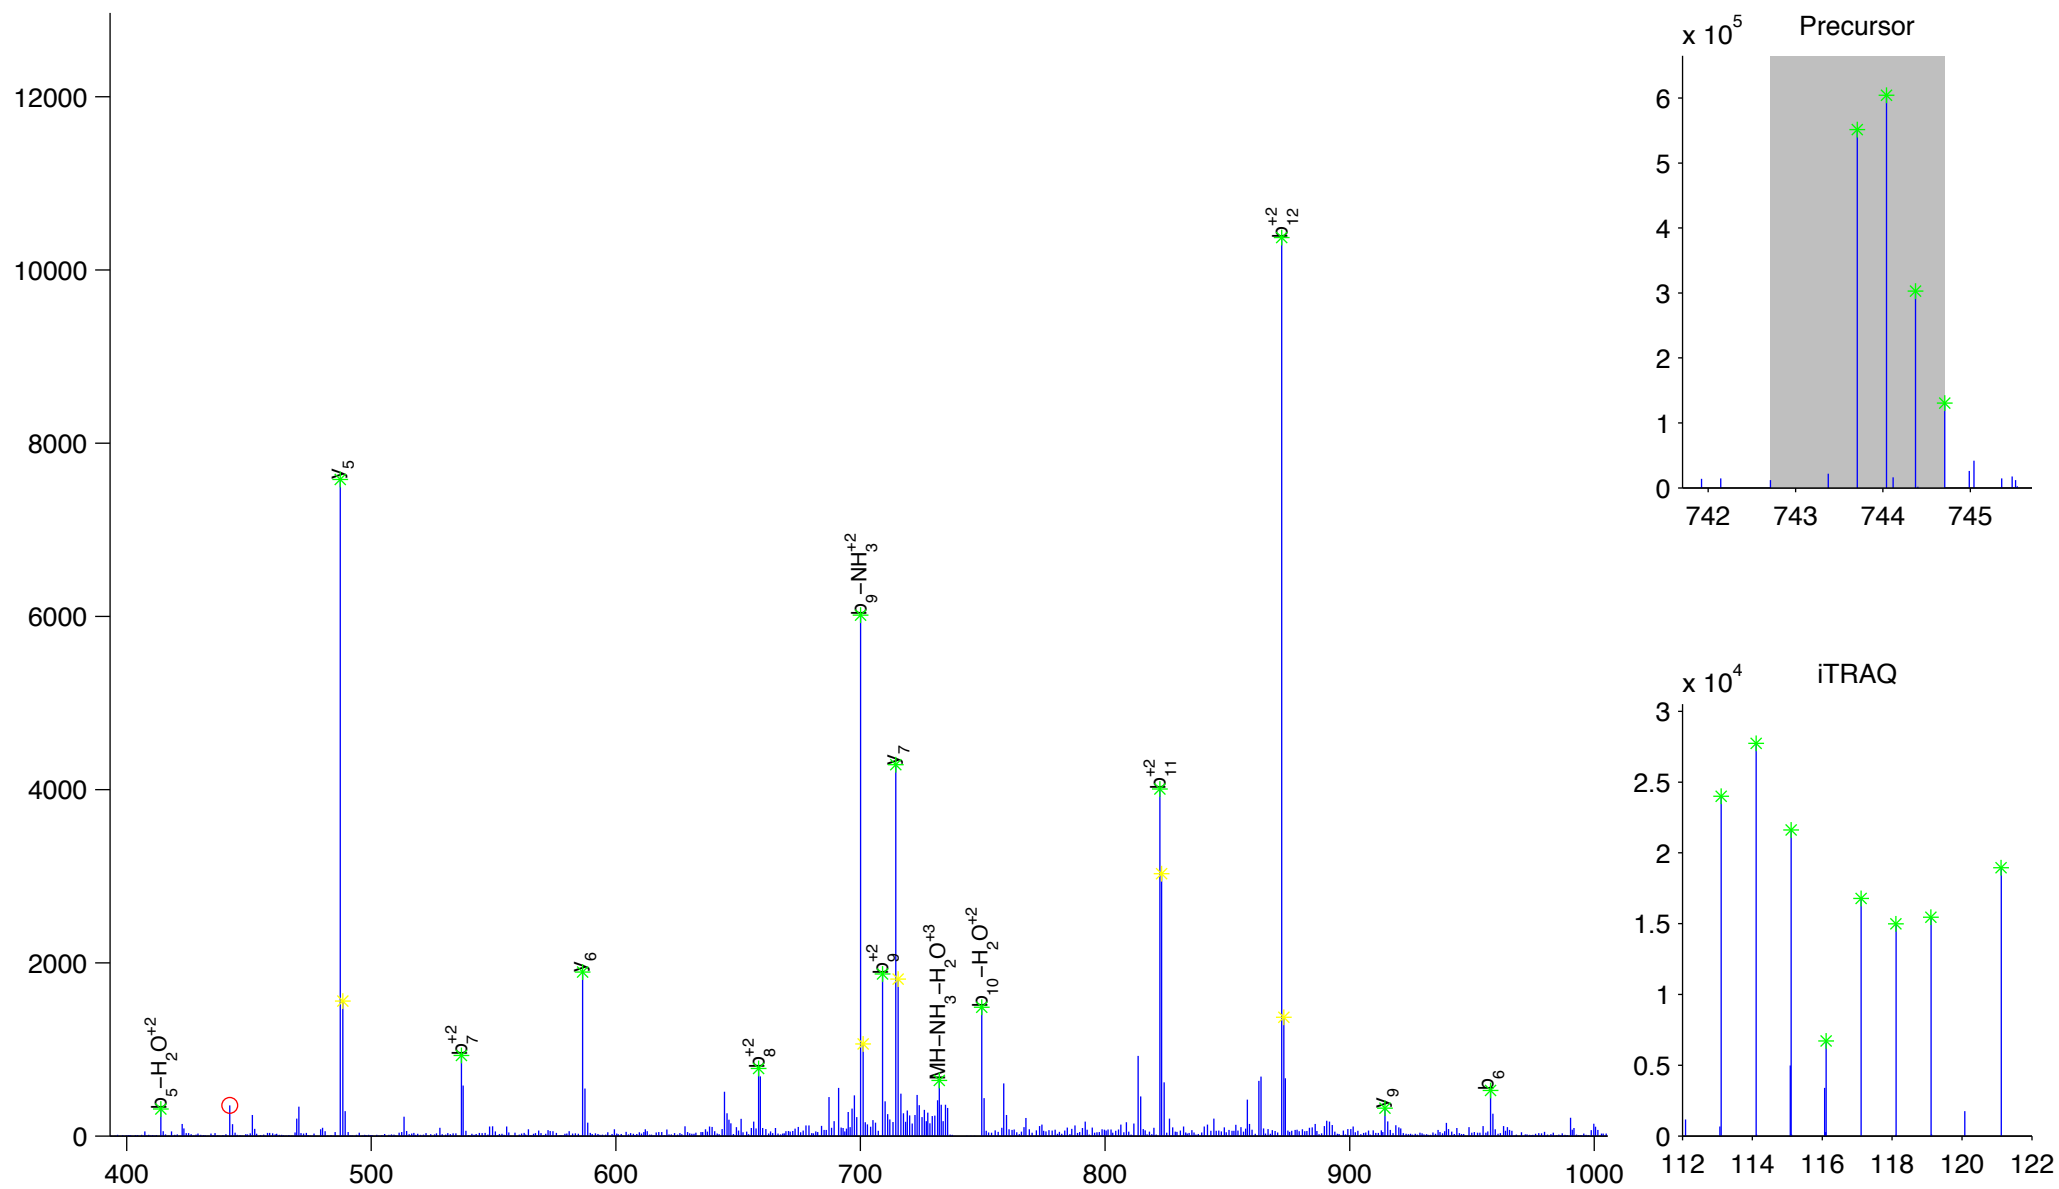

G[E]P[N]V[S]y[I]C[S]R

glycogen synthase kinase 3 beta

Charge State: +3

Scan Number: 3651

File Name: 100905ptp1blivers\_ncHFD\_basal.raw

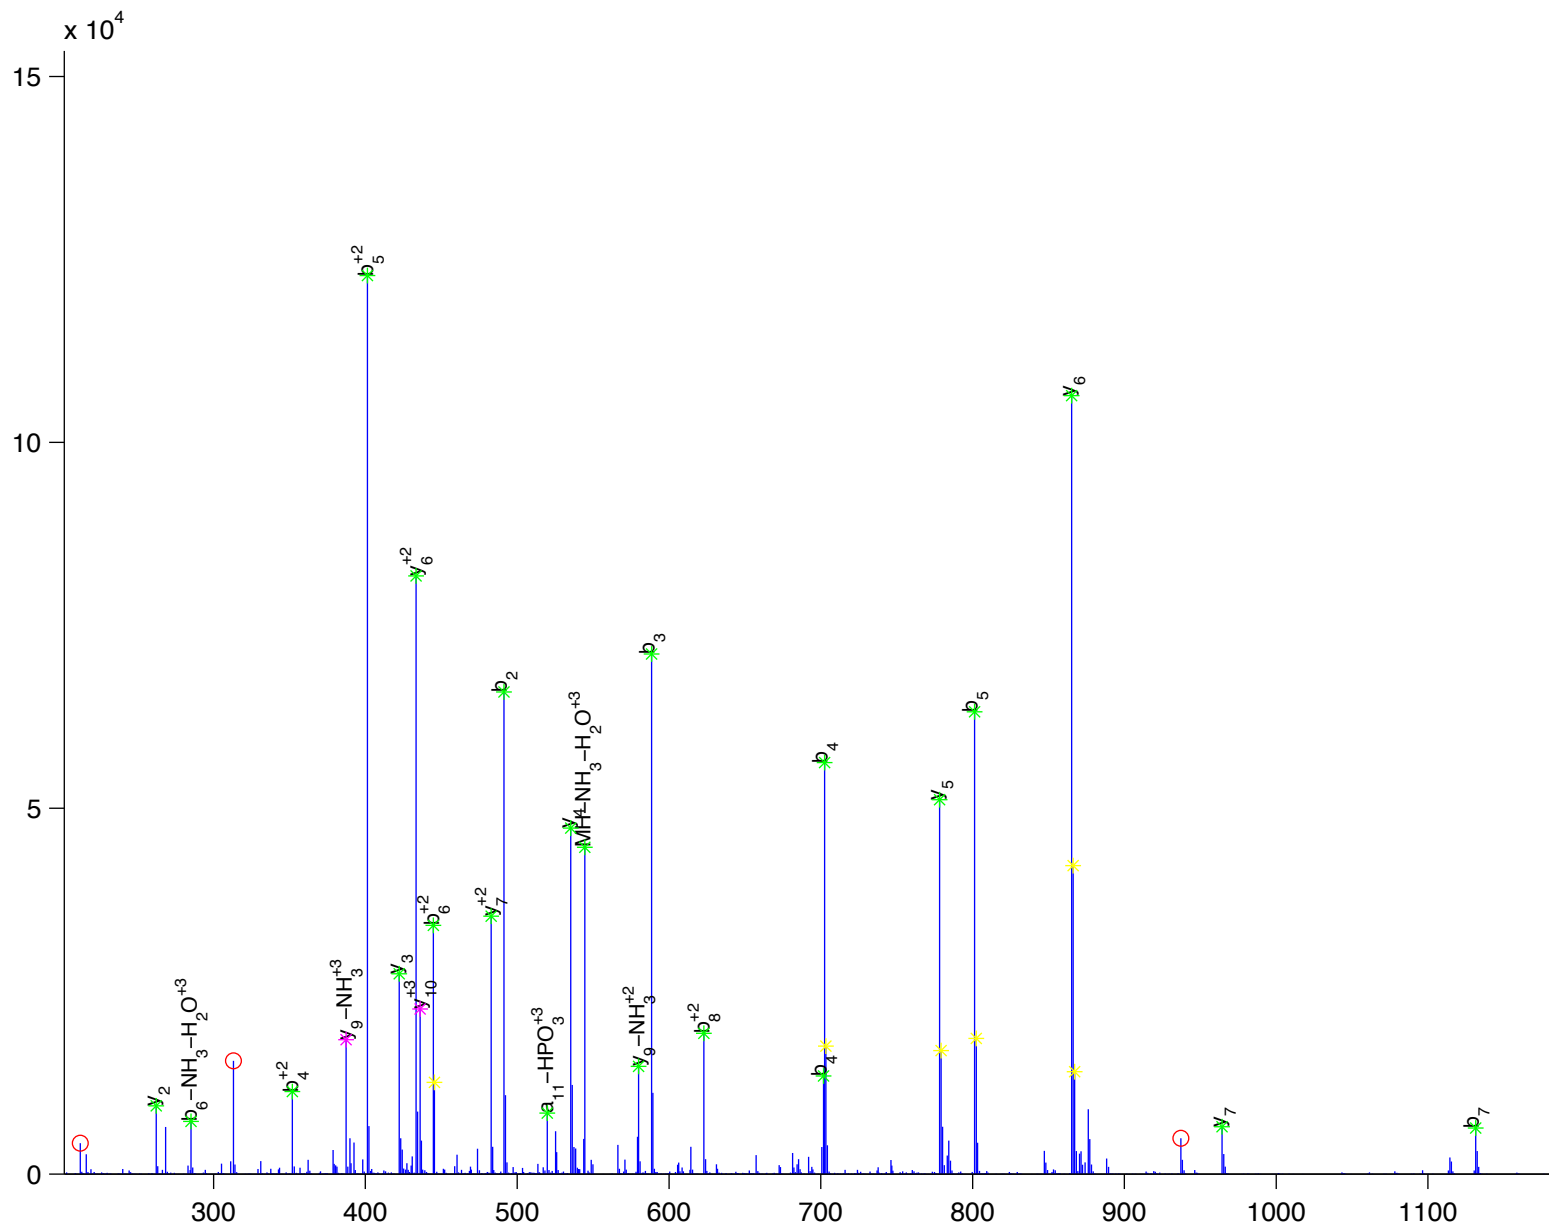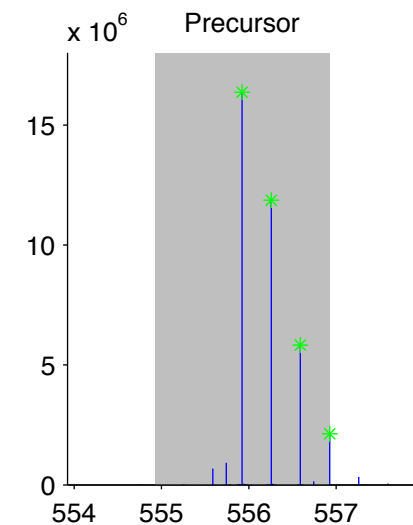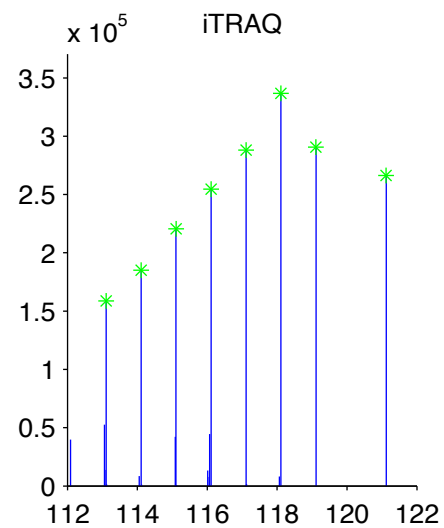

G[E]P[N]V[S]y[I]C[s]R

glycogen synthase kinase 3 beta

Charge State: +2

Scan Number: 4078

File Name: 090728ptp1blivers\_M\_NC\_ins\_e.raw

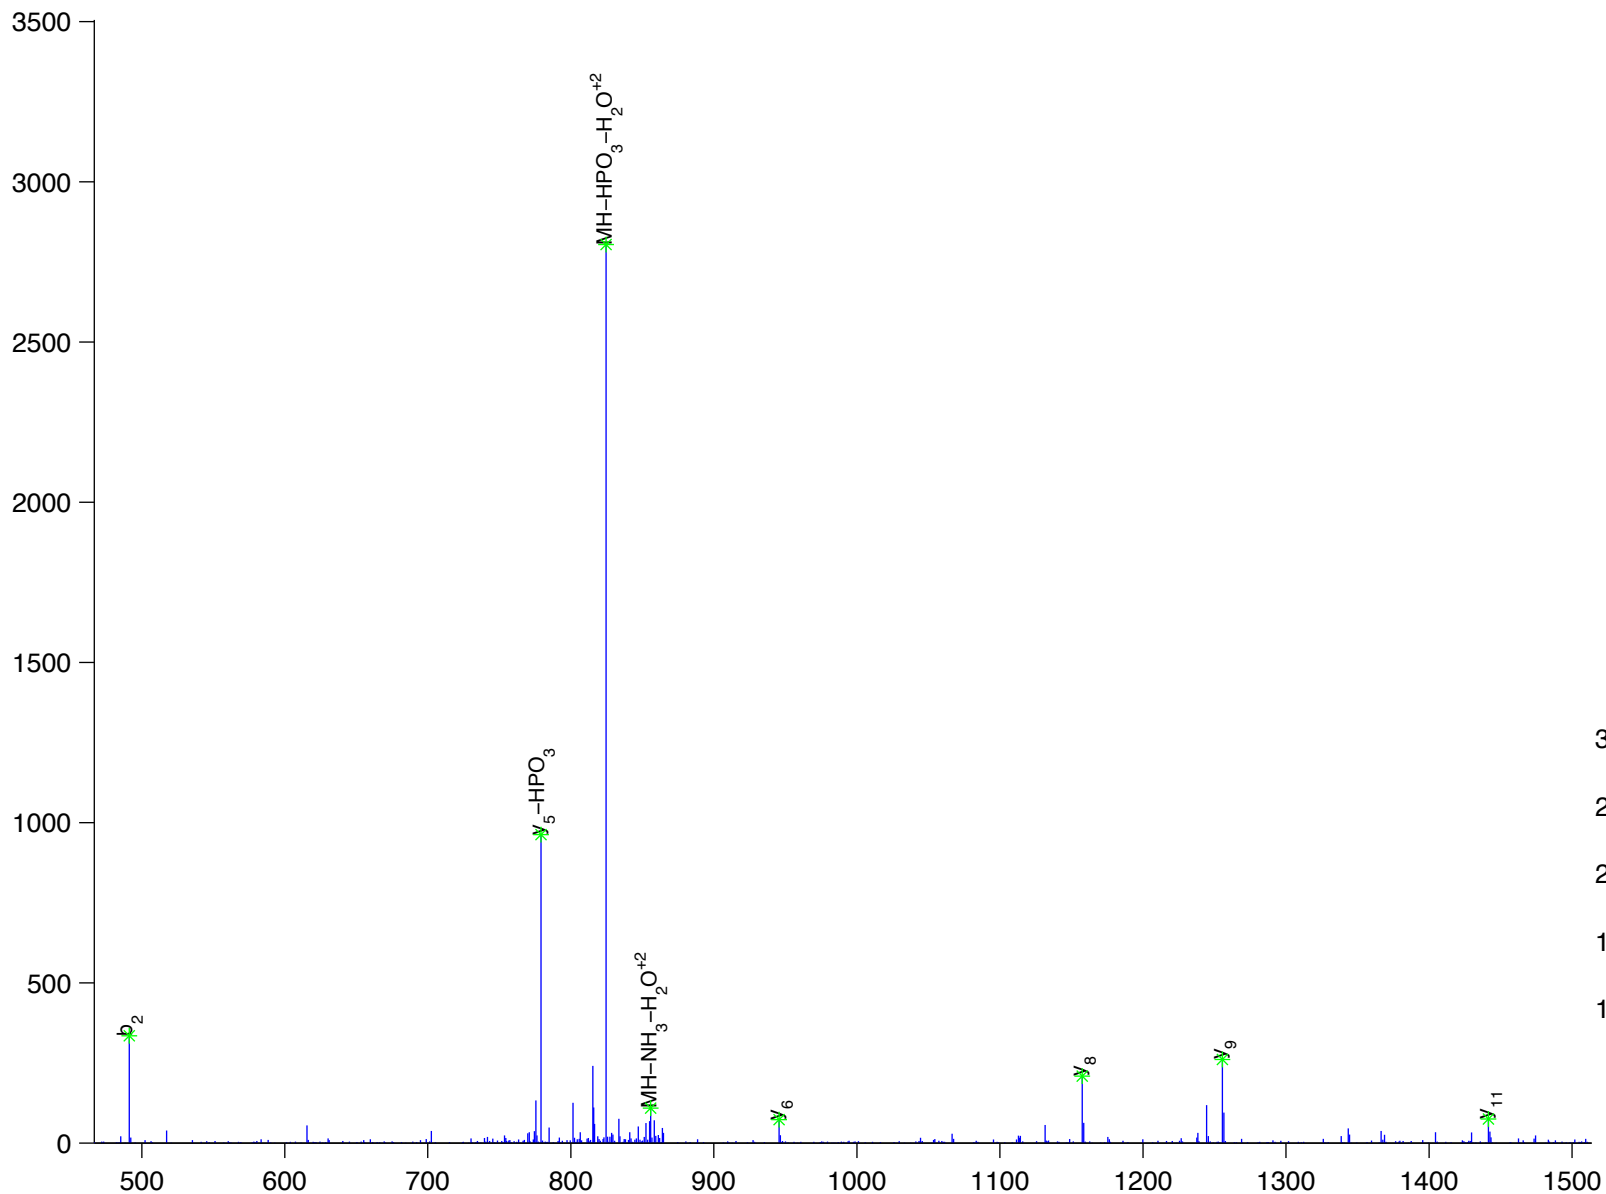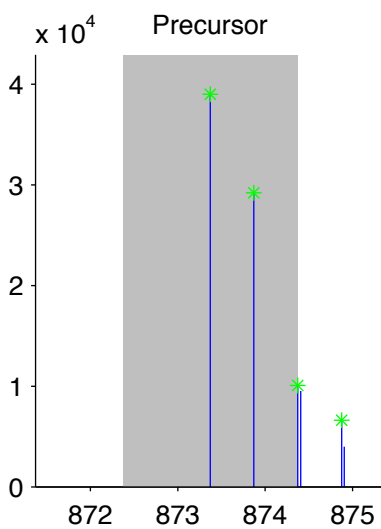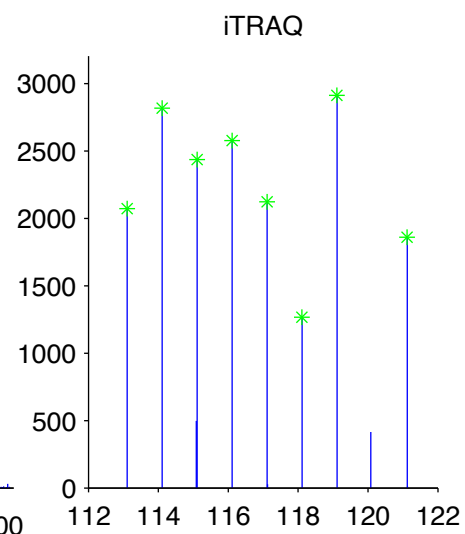

S [ S ] L [ T ] G [ S ] E [ T ] D [ N ] E [ D ] V [ y ] T [ F ] K

growth factor receptor bound protein 2-associated protein 2

Charge State: +3

Scan Number: 3835

File Name: 100827ptp1blivers\_ncHFD\_basal.raw

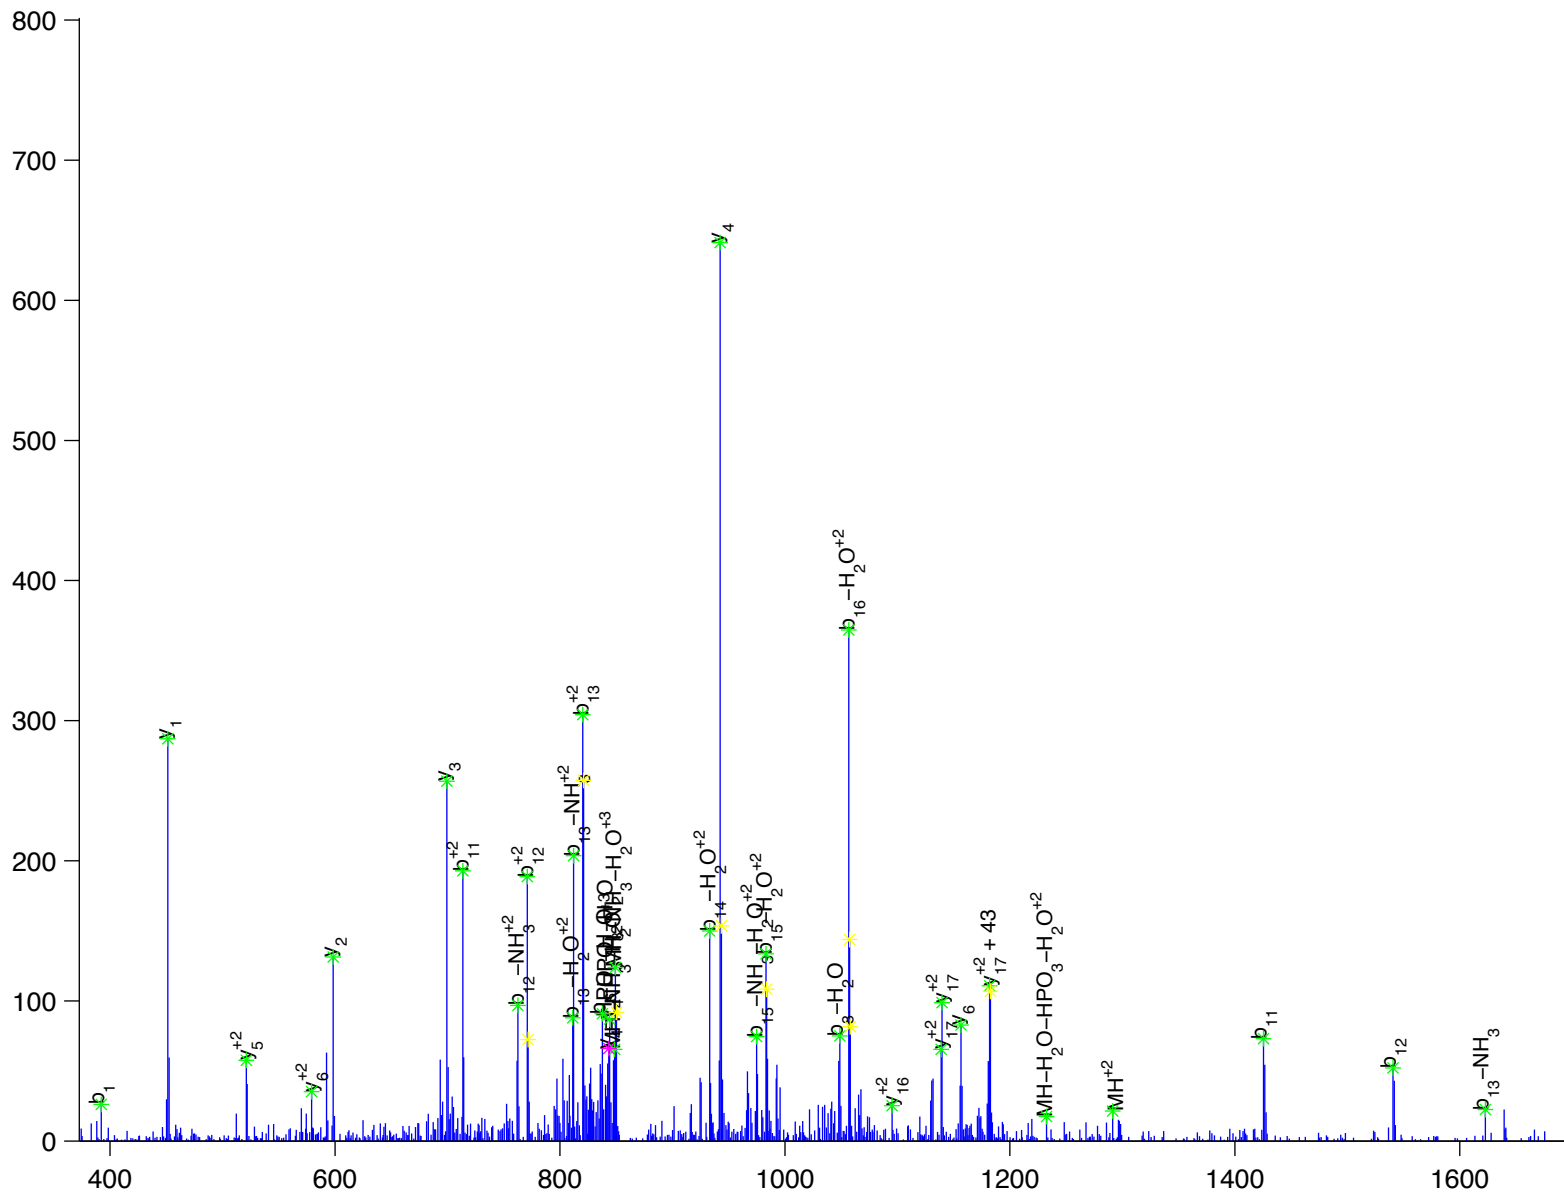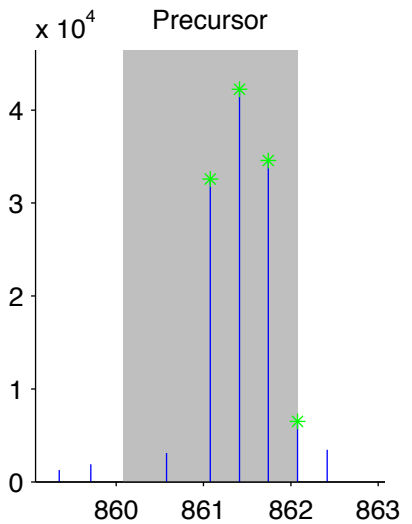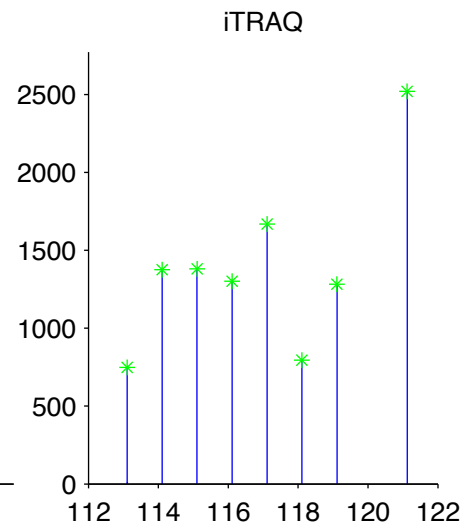

S [ V ] [ L ] [ G ] [ N ] [ N ] [ F ] [ y ] [ E ] [ Y ] [ Y ] [ V ] [ N ] [ D ] [ P ] [ P ] [ R ]

GTP cyclohydrolase I feedback regulator

Charge State: +3

Scan Number: 5672

File Name: 090728ptp1blivers\_M\_NC\_ins\_e.raw

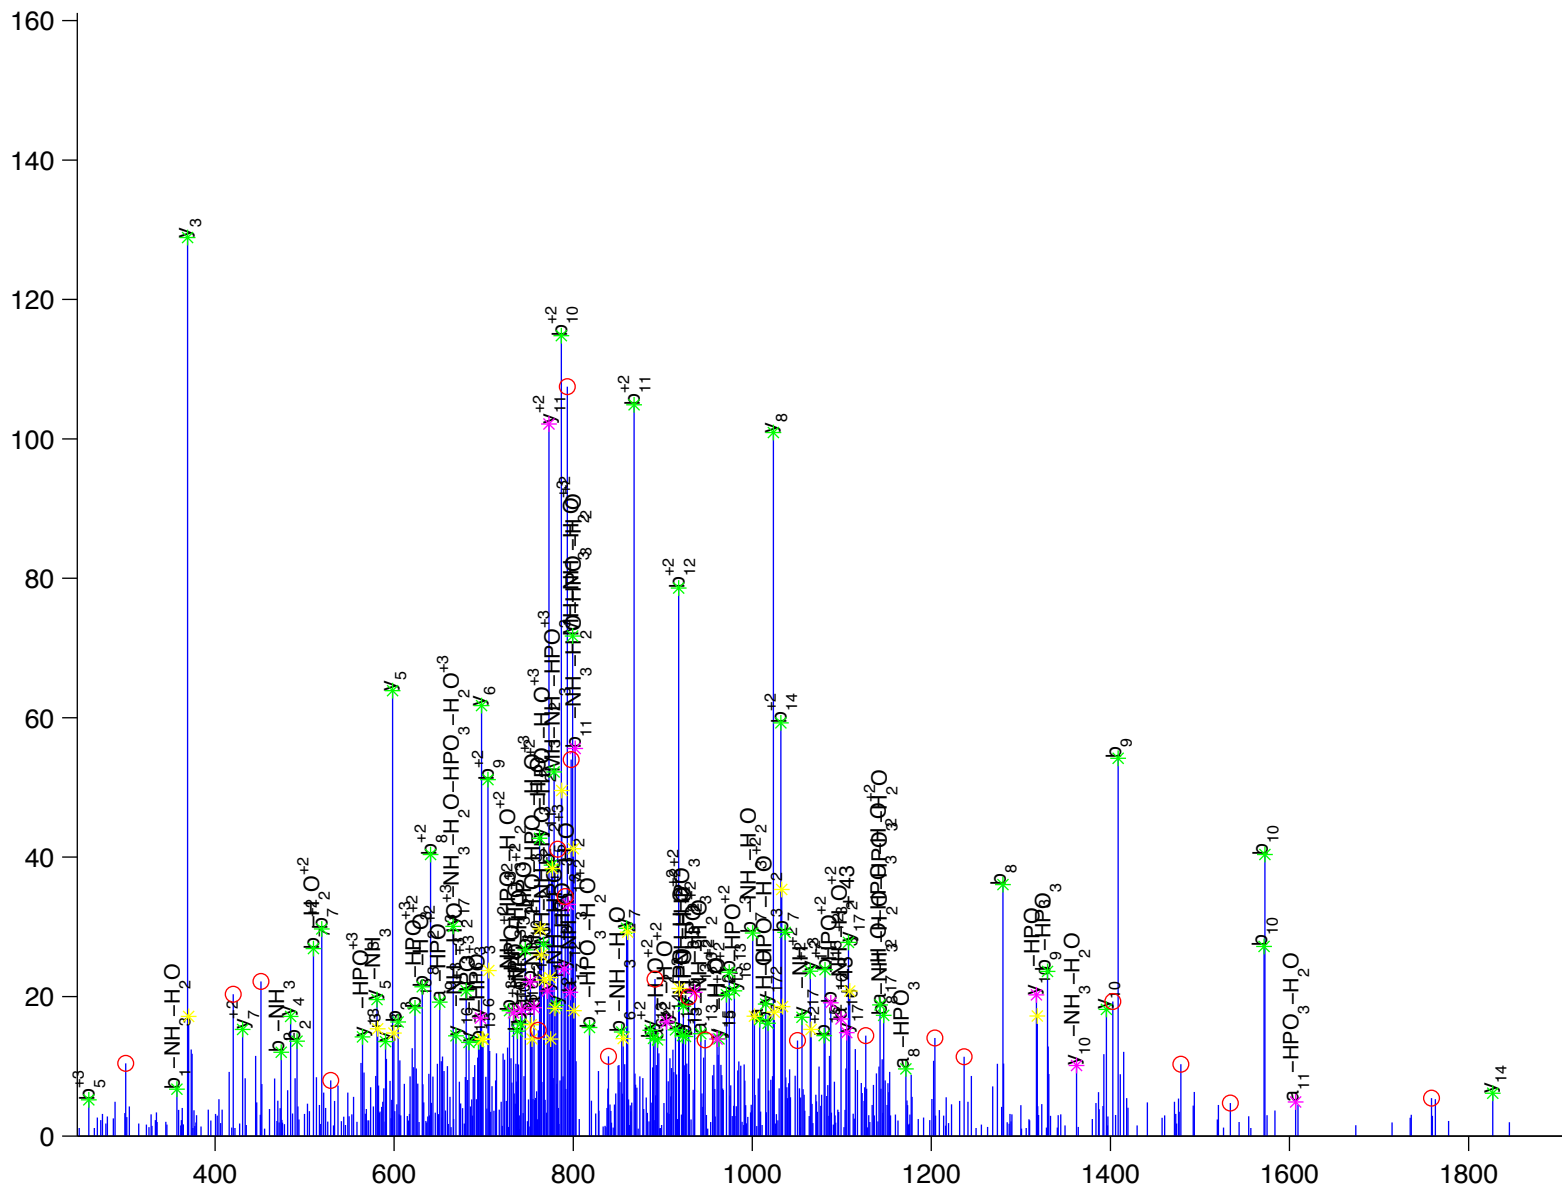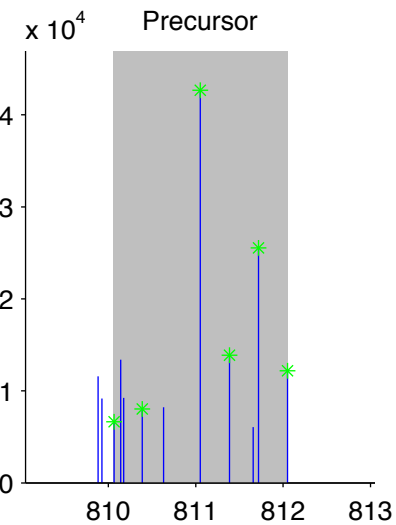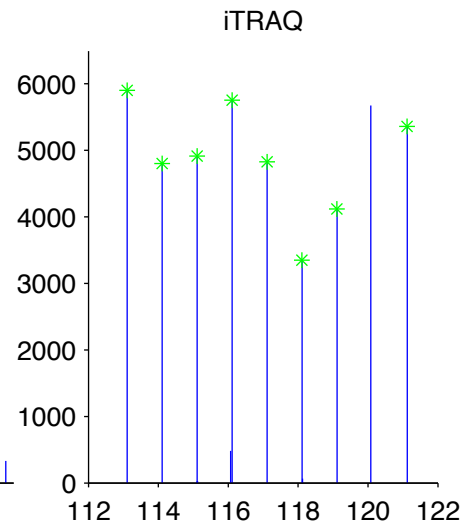





C [ E ] F [ Q ] D [ A ] y V [ L ] L [ S ] E [ ] K

heat shock protein 1 (chaperonin)

Charge State: +3

Scan Number: 5991

File Name: 090728ptp1blivers\_M\_NC\_ins\_e.raw

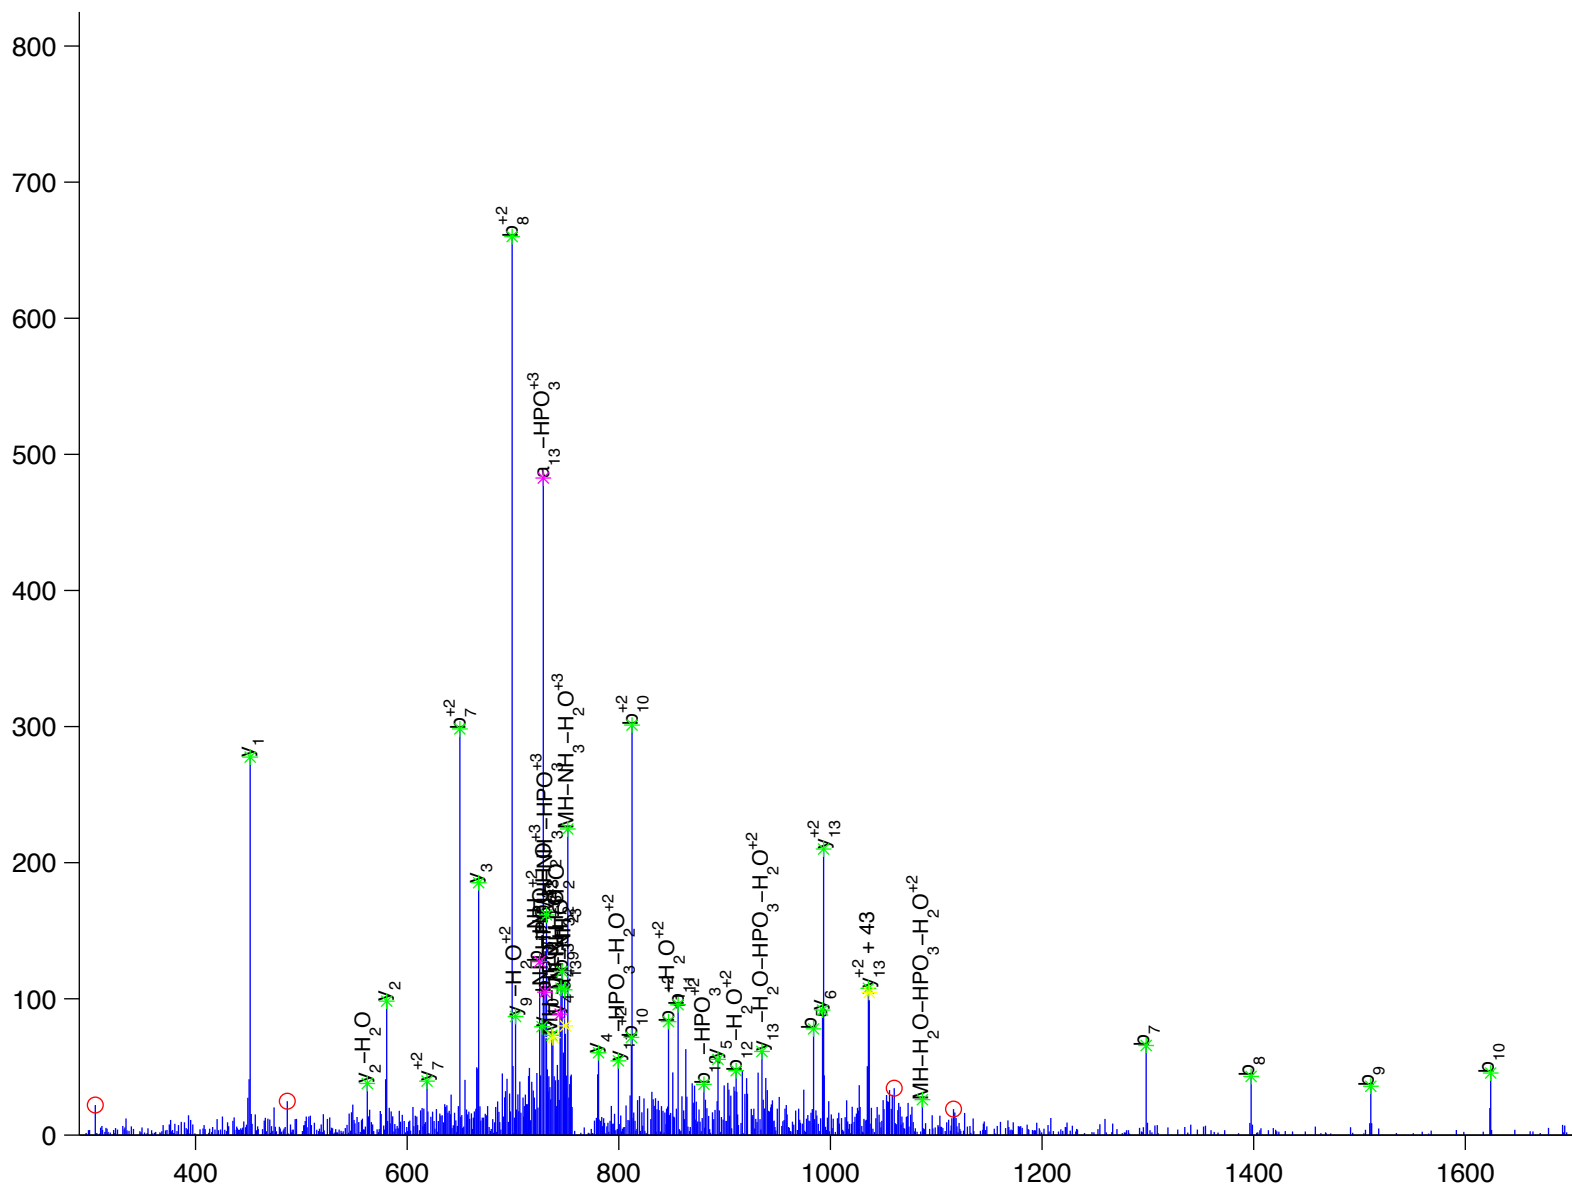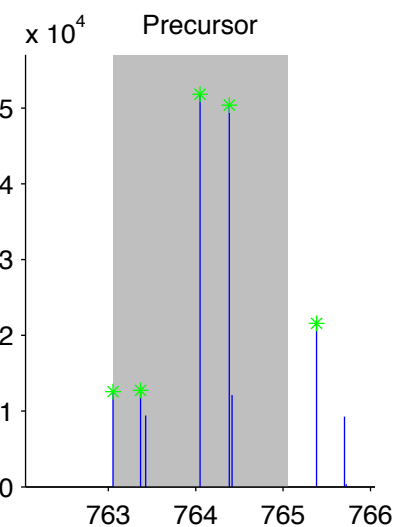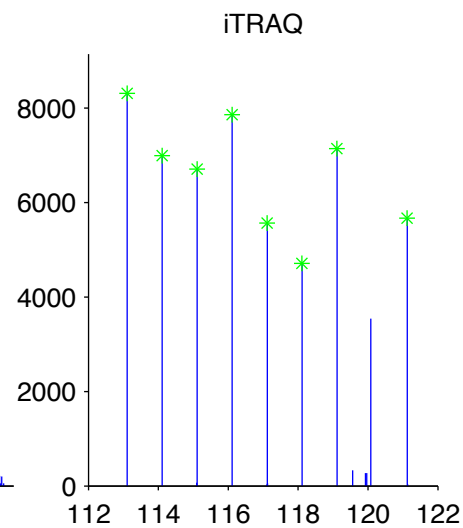

I [ Q ] E [ I ] T [ E ] Q [ L ] D [ I ] T [ T ] S [ E ] y [ E ] K [ E ] K [

heat shock protein 1 (chaperonin)

Charge State: +4

Scan Number: 6435

File Name: 100908ptp1blivers\_ncHFD3\_basal.raw

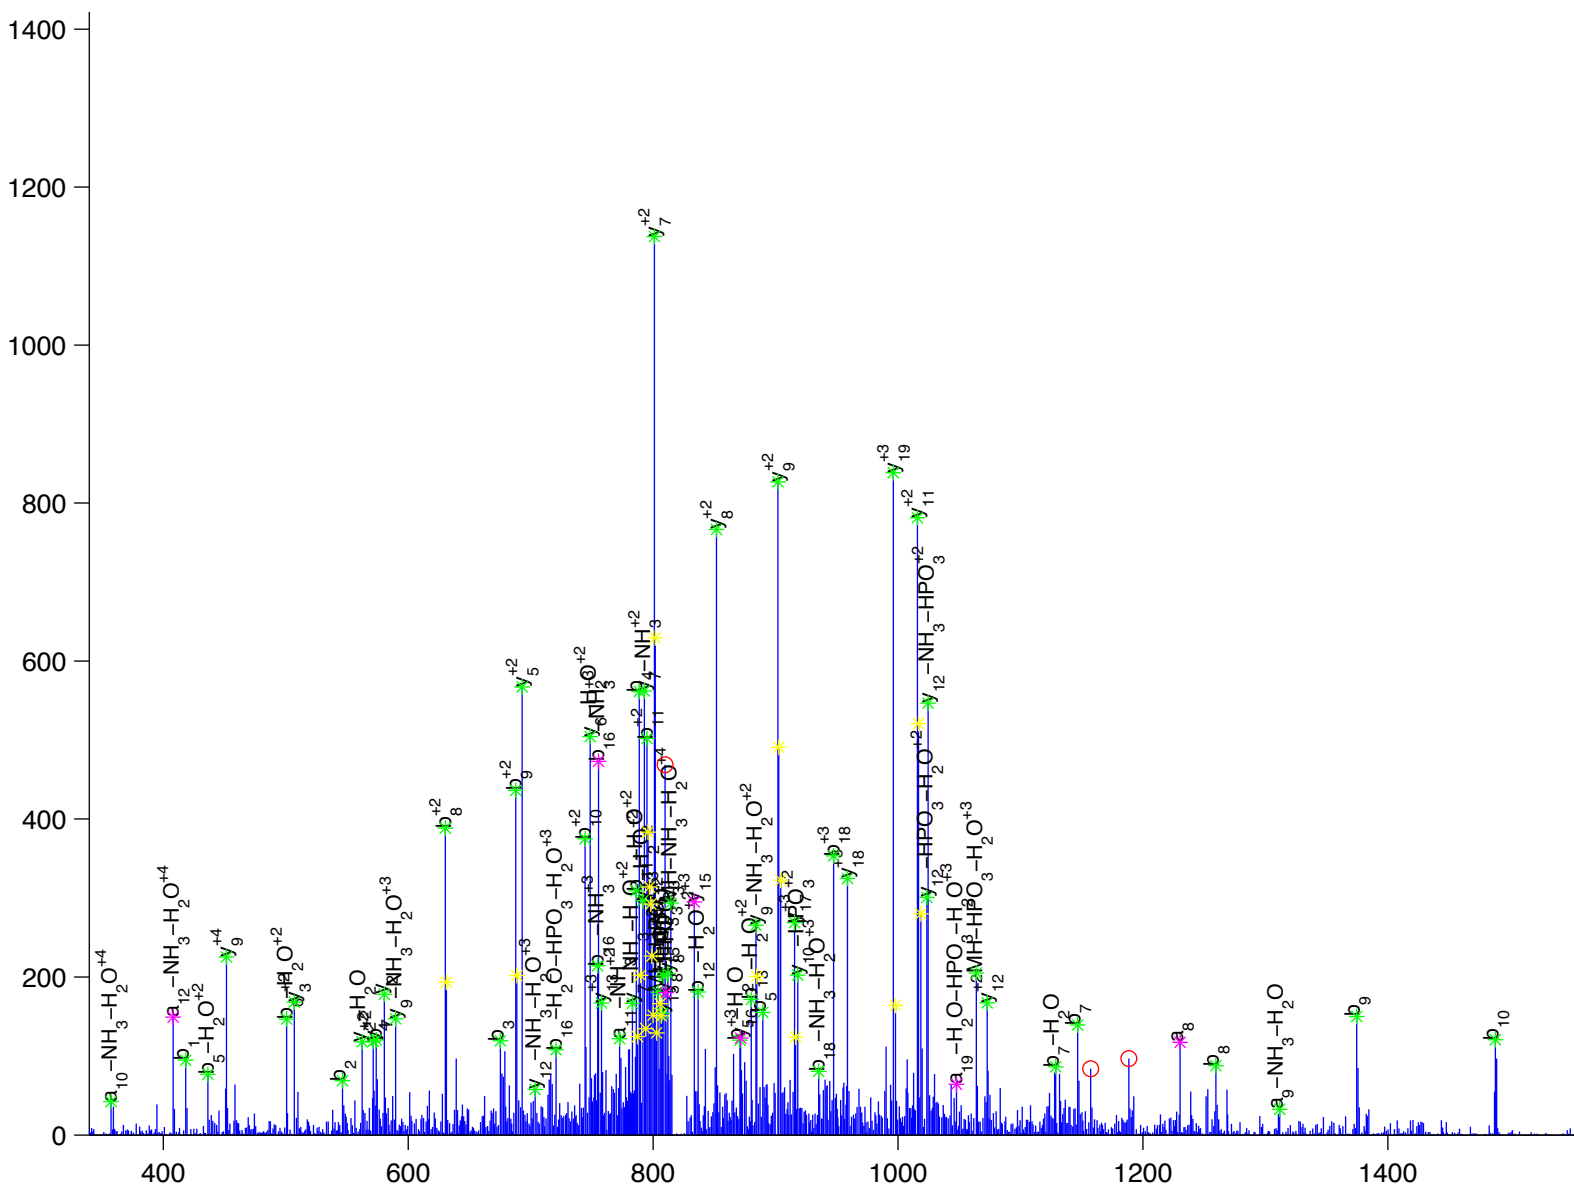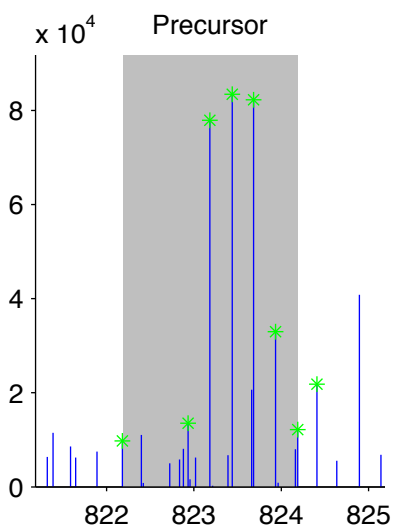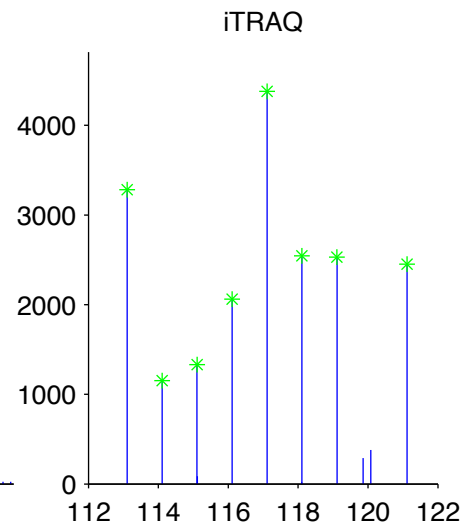

$\begin{matrix} \text{y} & \text{I} & \text{D} & \text{Q} & \text{E} & \text{E} & \text{L} & \text{N} & \text{K} \\ \text{[} & \text{[} \\ \text{]} & \text{]} \end{matrix}$

heat shock protein 1, alpha

Charge State: +3

Scan Number: 3293

File Name: 100827ptp1blivers\_ncHFD\_basal.raw

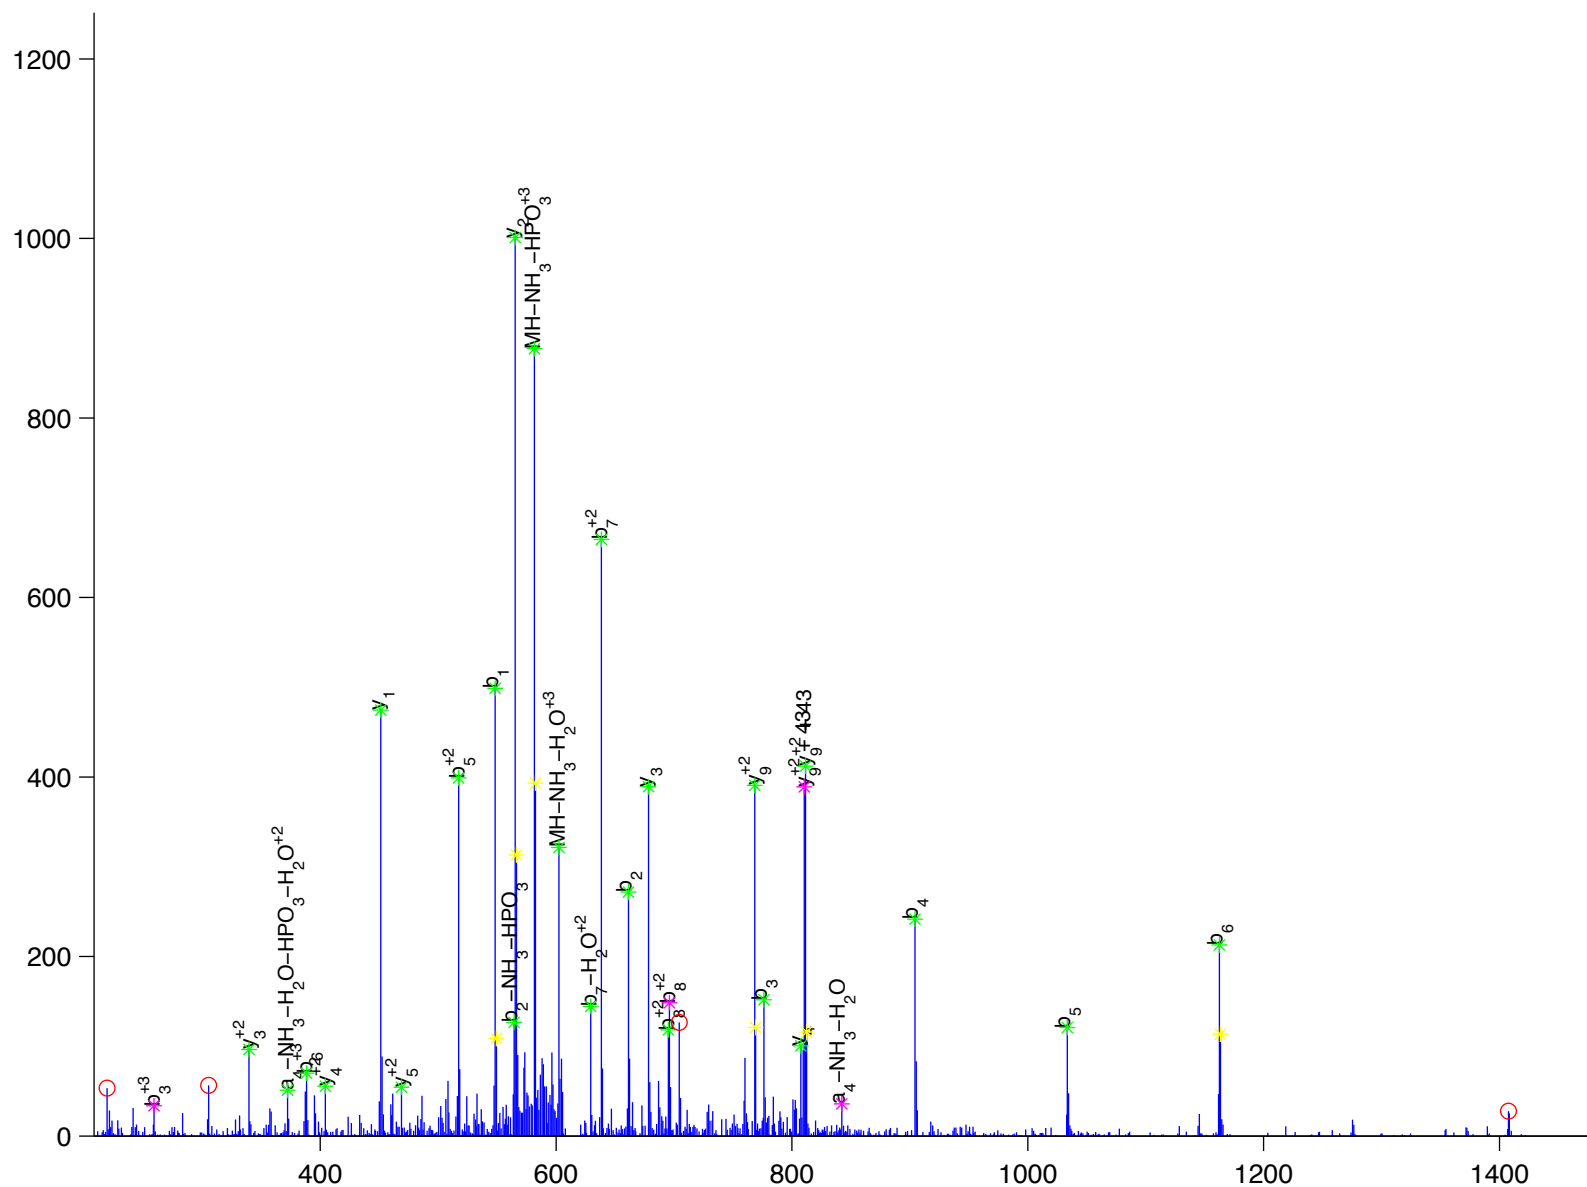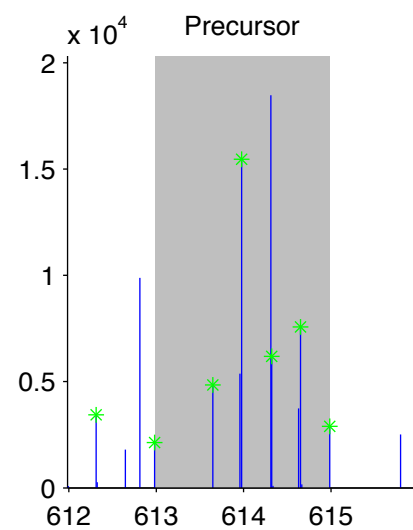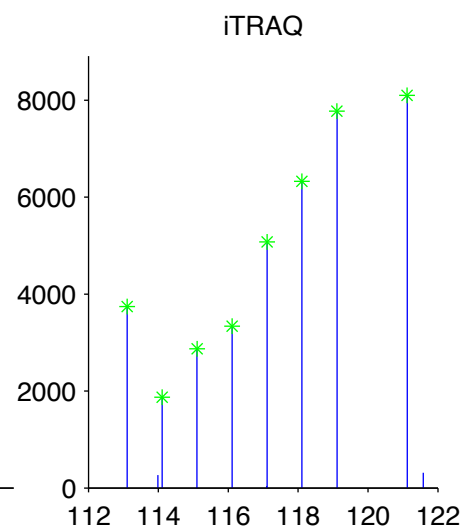

A [ P ] A [ A ] I [ G ] P [ y ] S [ Q ] A [ V ] Q [ V ] D [ R ]

heat-responsive protein 12

Charge State: +2

Scan Number: 3813

File Name: 090728ptp1blivers\_M\_NC\_ins\_e.raw

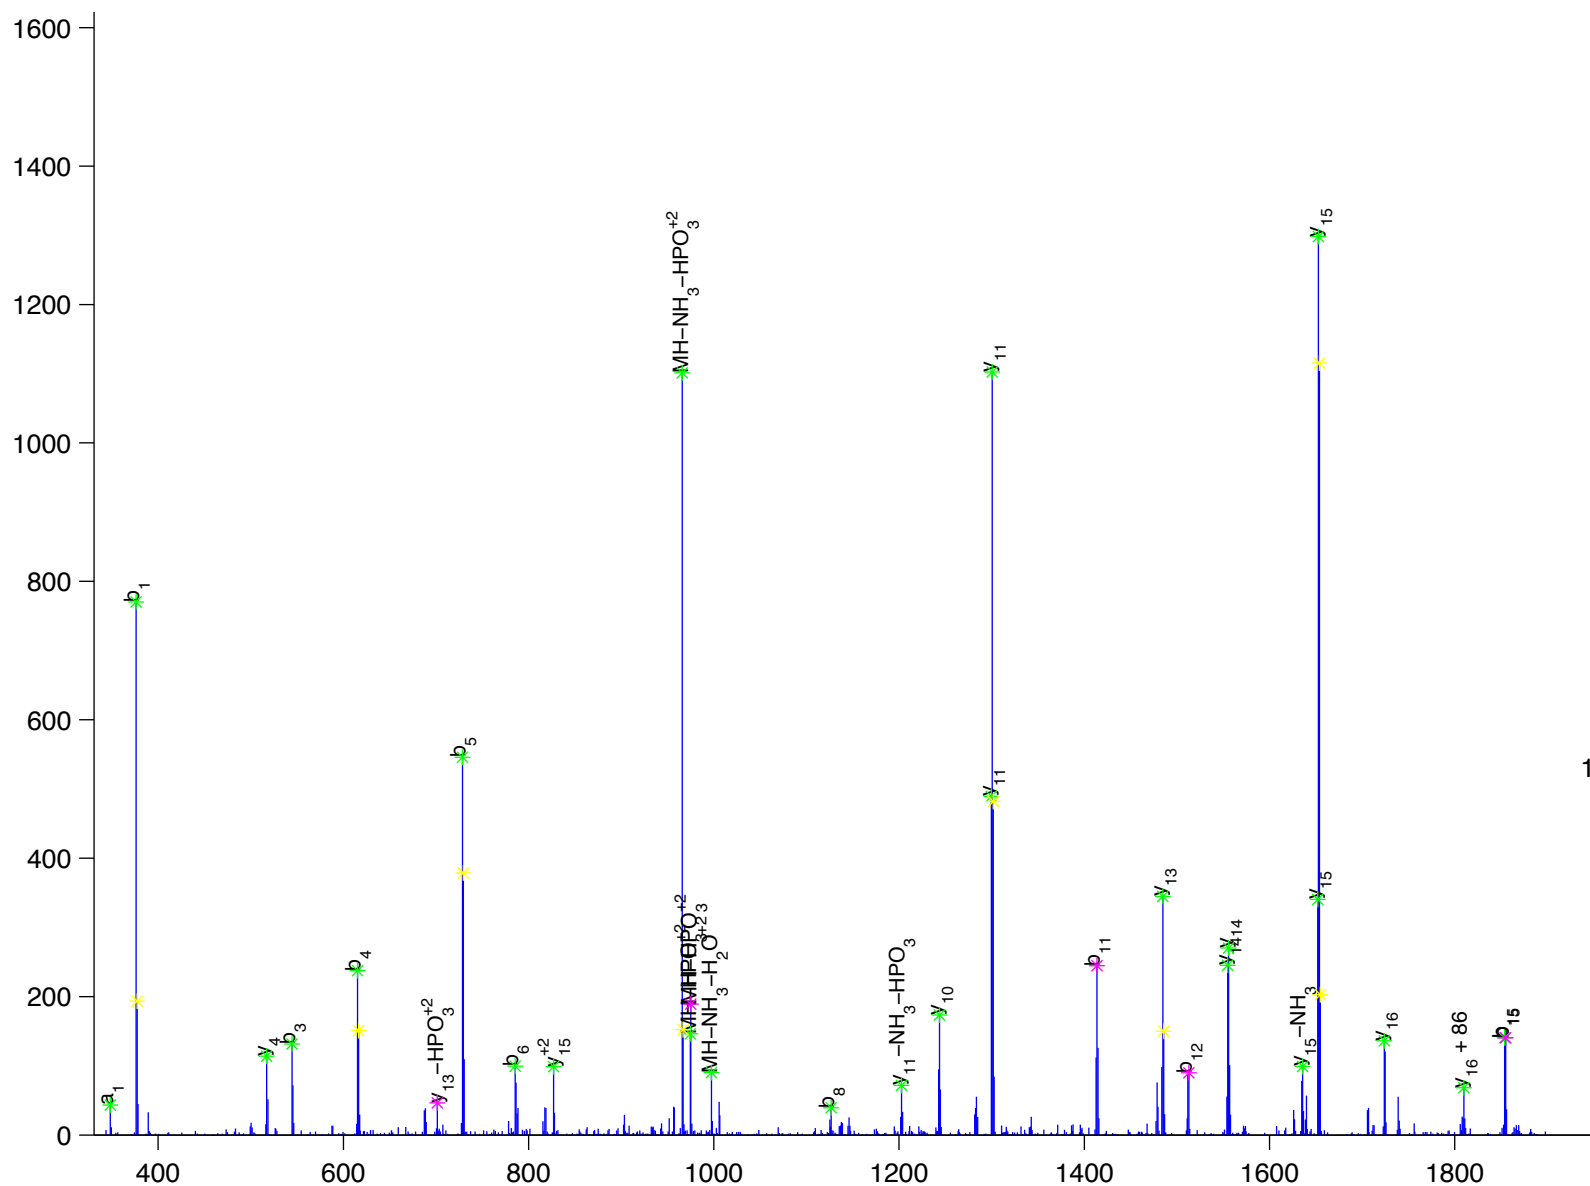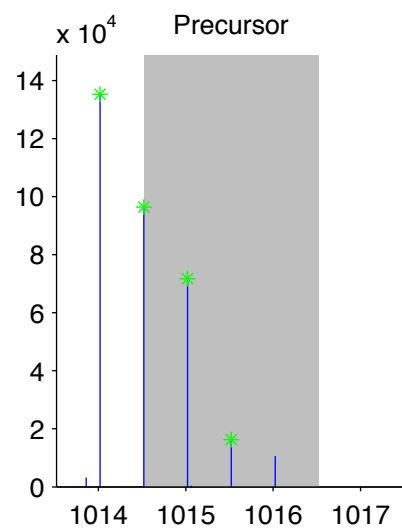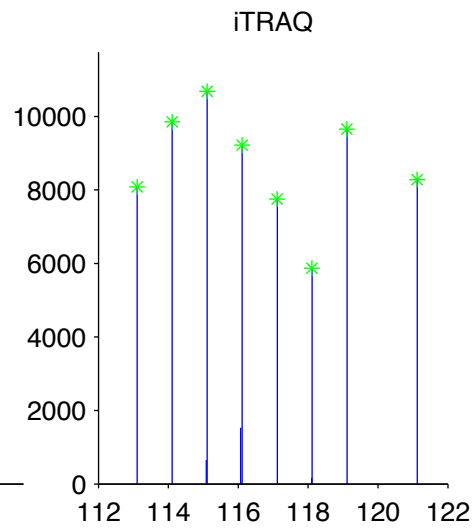

I [G] G [H] G [A] E [y] G [A] E [A] L [E] R

hemoglobin alpha 1 chain

Charge State: +2

Scan Number: 5317

File Name: 090807ptp1blivers\_M\_HFD\_basal.raw

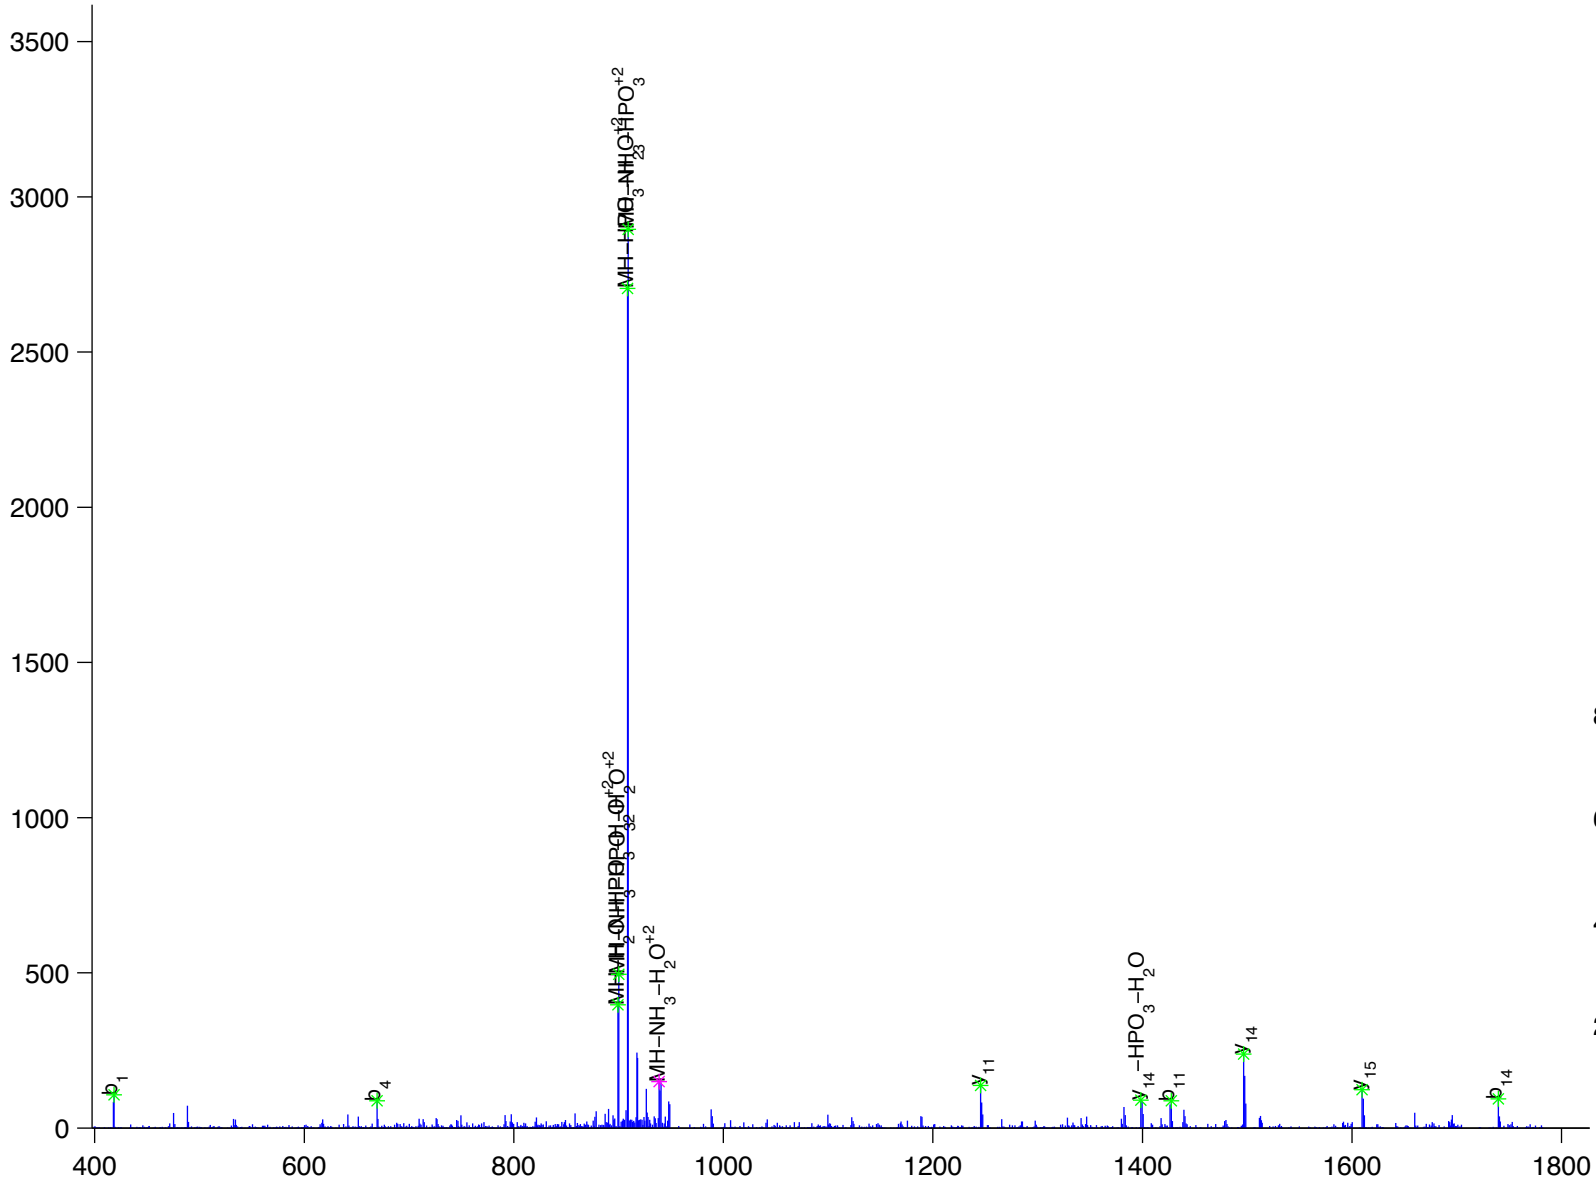



$y$ 
 $\left[ \begin{array}{c} \text{F} \\ \text{D} \\ \text{S} \\ \text{F} \\ \text{G} \\ \text{D} \\ \text{L} \\ \text{S} \\ \text{S} \\ \text{A} \\ \text{S} \\ \text{A} \\ \text{I} \\ \text{M} \\ \text{G} \\ \text{N} \\ \text{A} \\ \text{K} \end{array} \right]$

hemoglobin, beta adult major chain

Charge State: +3

Scan Number: 9176

File Name: 090806ptp1blivers\_M\_NC2.raw

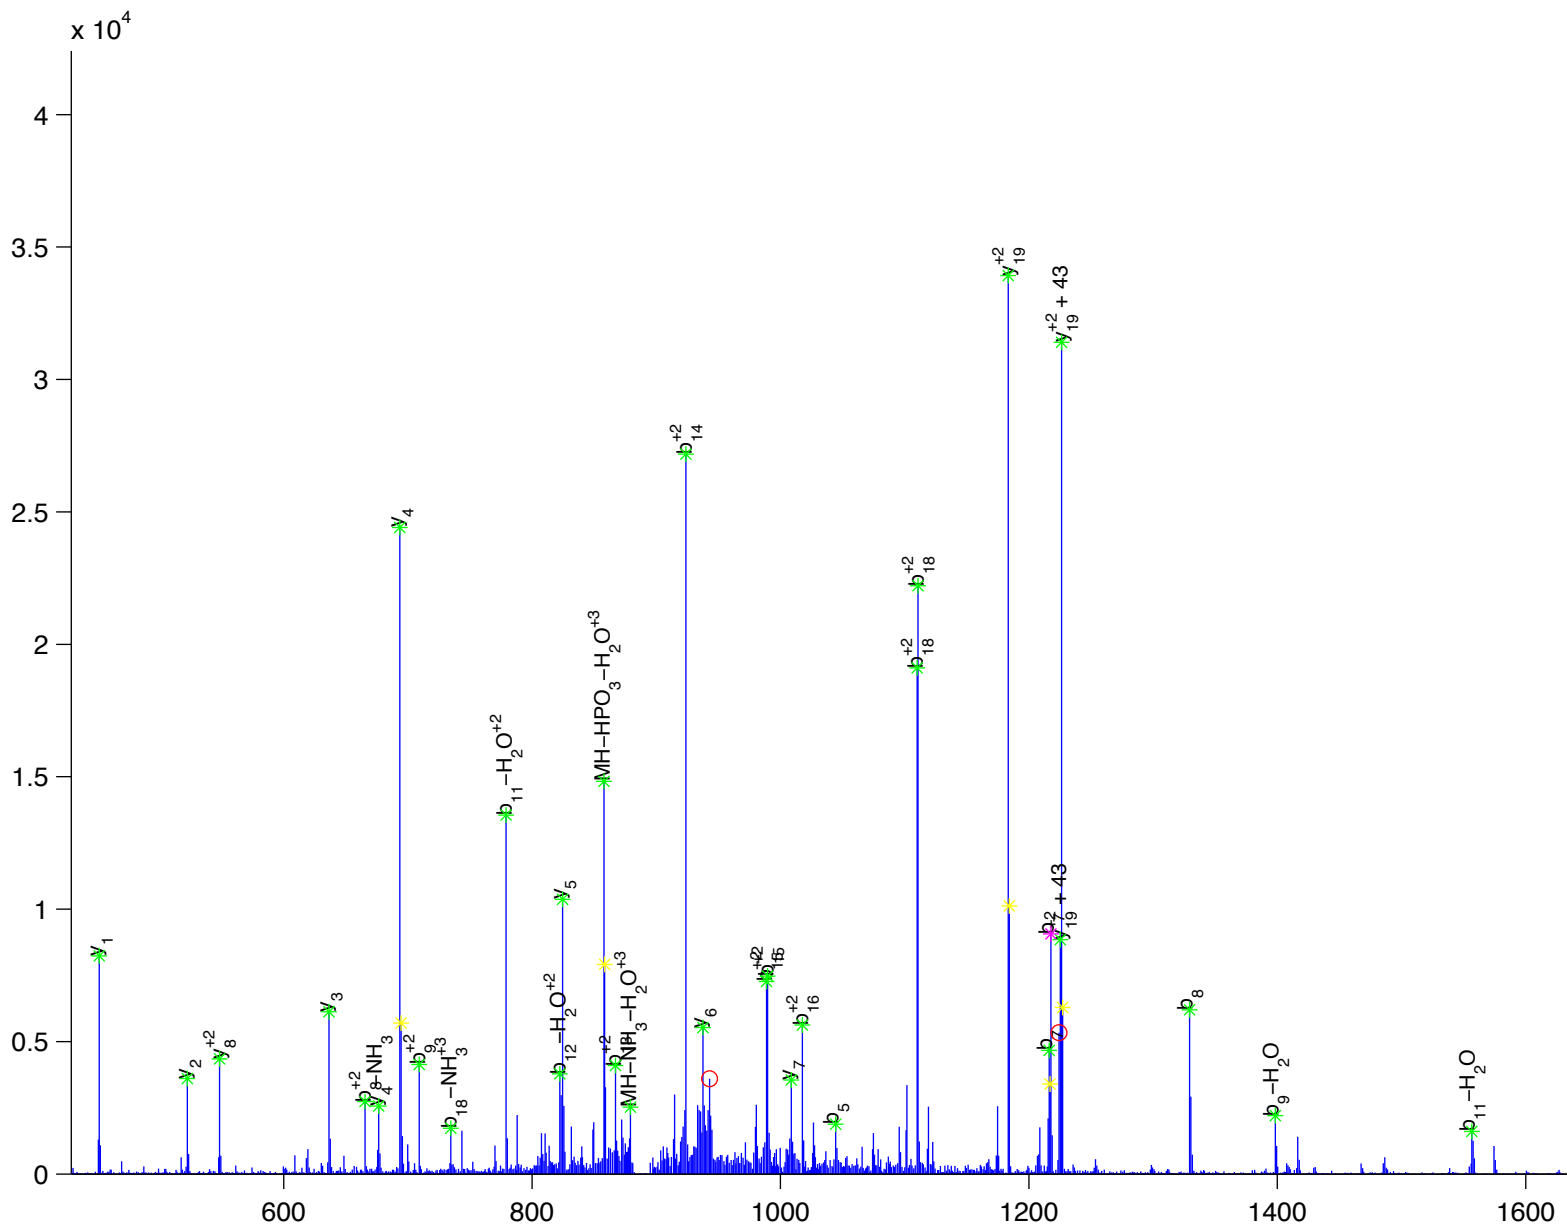



V [ C ] E [ P ] C [ y ] E [ Q ] L [ N ] K

HGF-regulated tyrosine kinase substrate

Charge State: +3

Scan Number: 4733

File Name: 091130ptp1blivers\_hfd\_basal2.raw

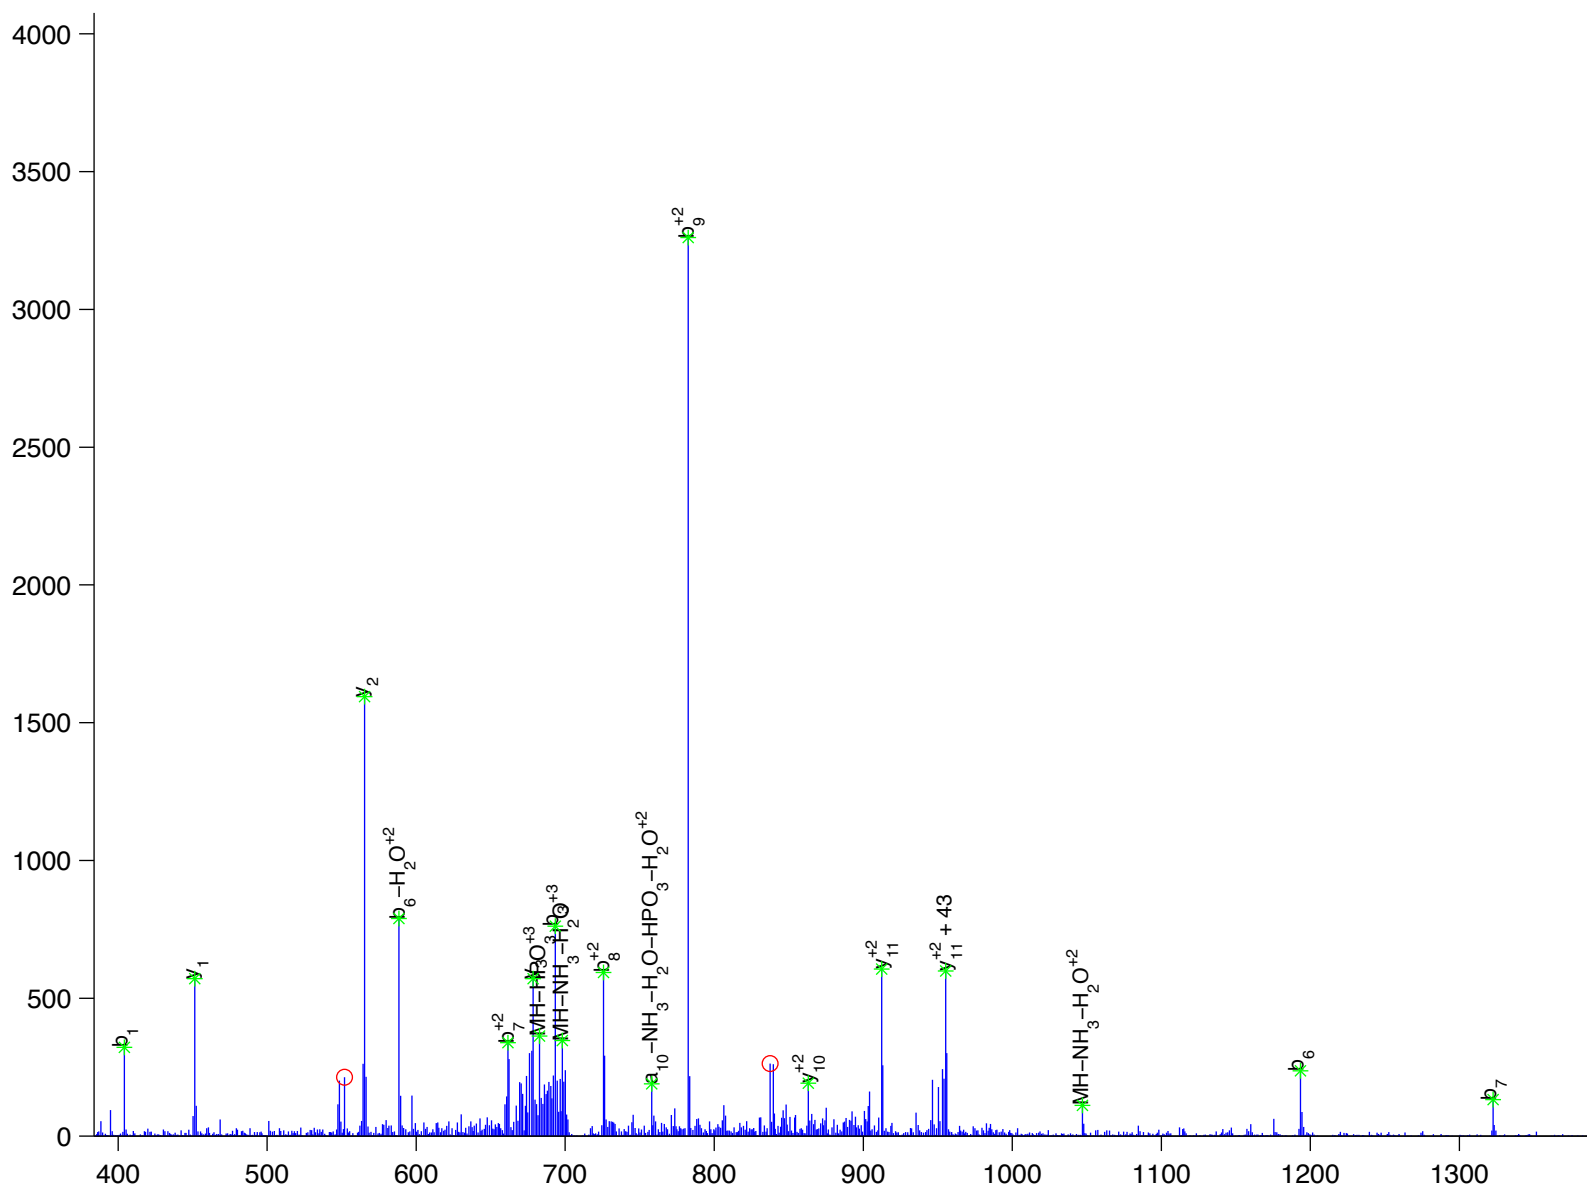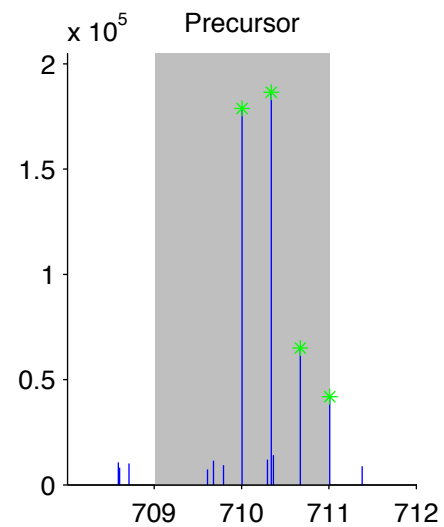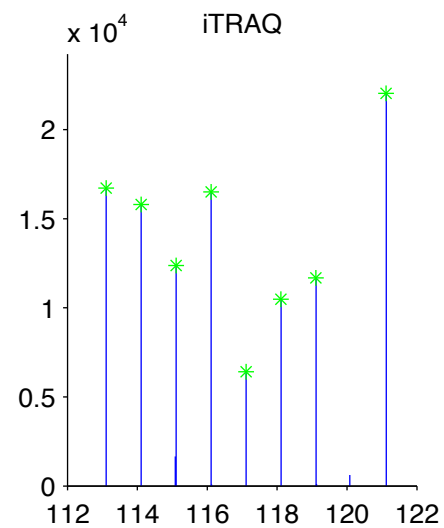

M [ D ] y [ V ] E [ I ] N [ I ] D [ H ] K

high density lipoprotein binding protein

Charge State: +3

Scan Number: 5865

File Name: 090806ptp1blivers\_M\_NC2.raw

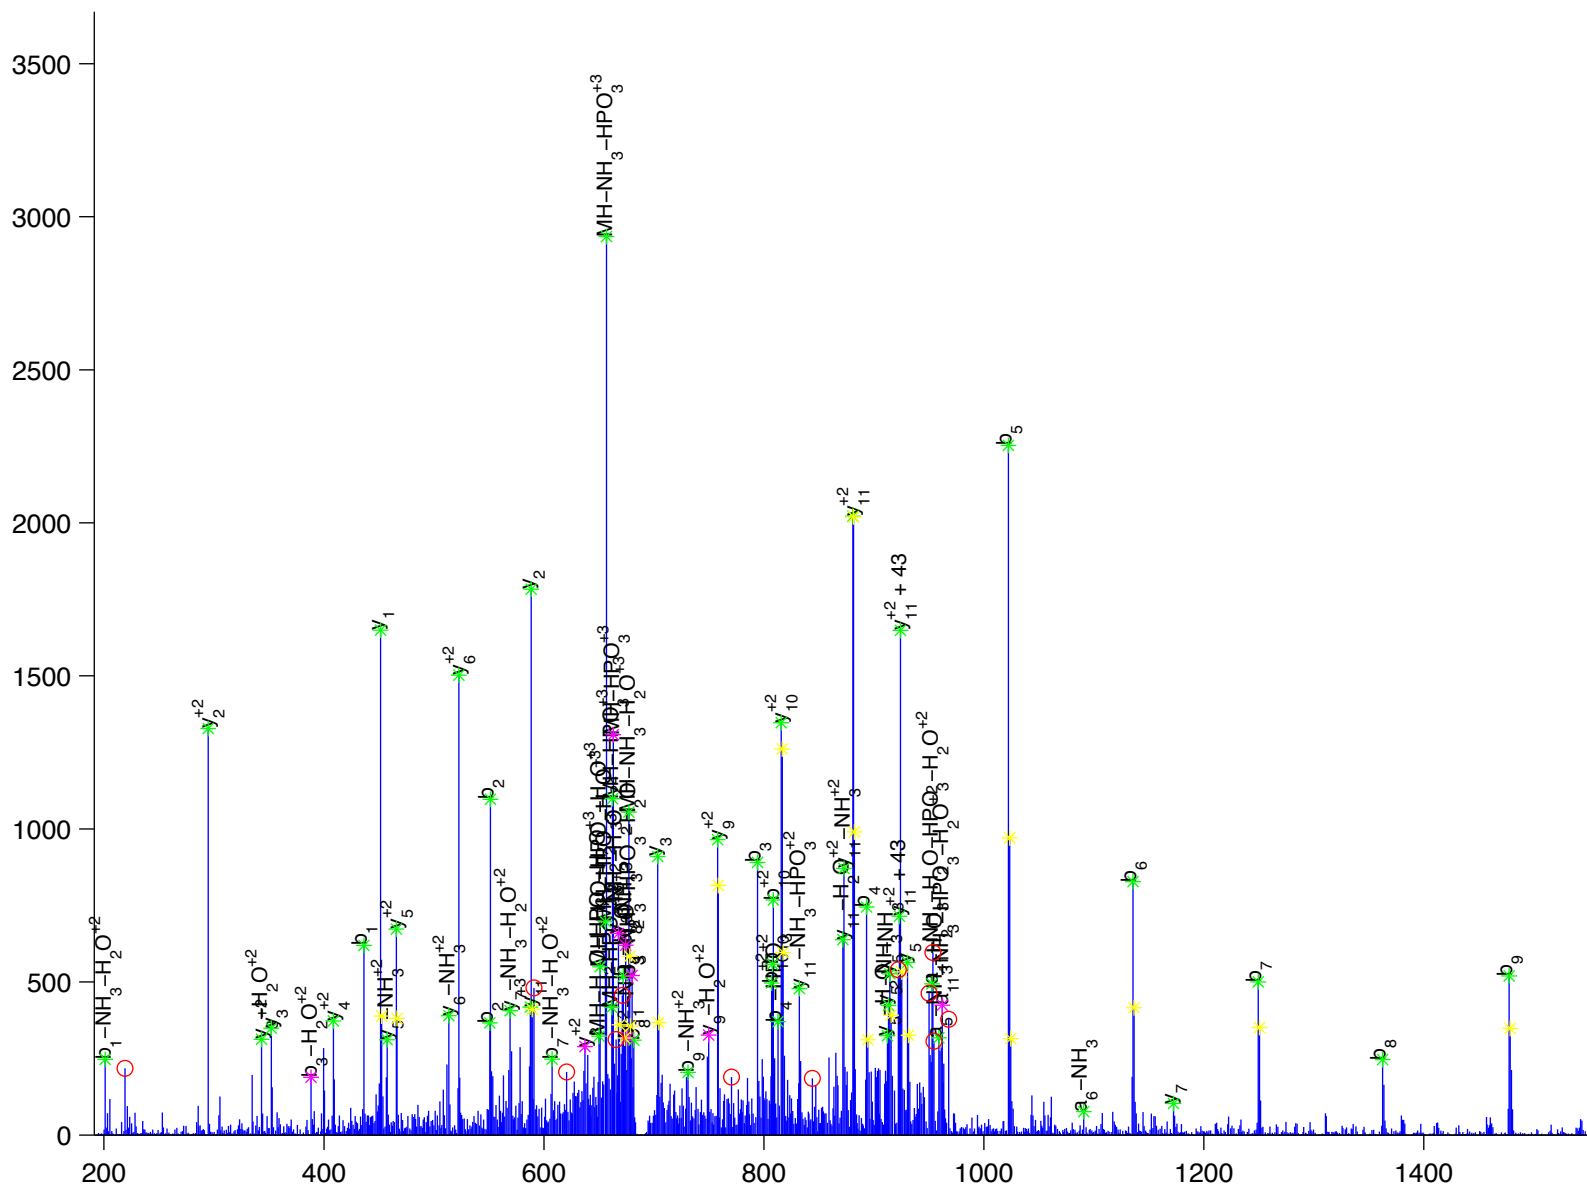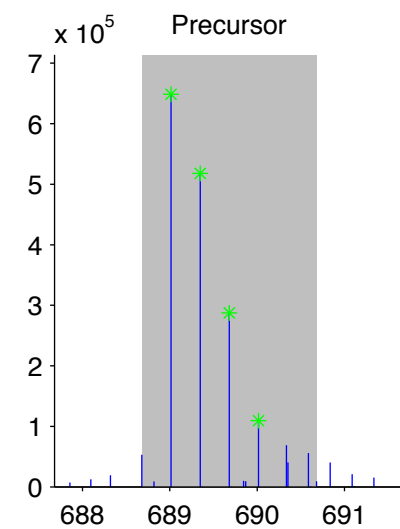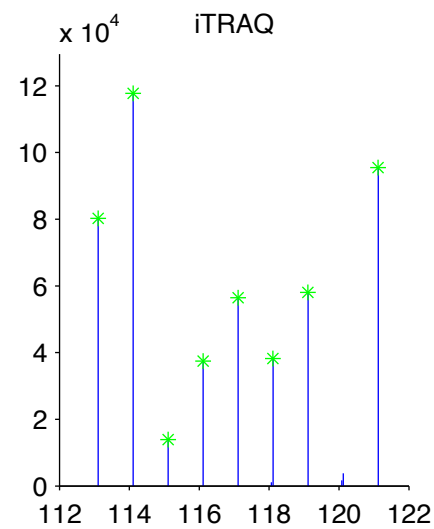

G [ G ] D [ y ] A [ L ] A [ P ] G [ S ] Q [ S ] S [ E ] M [ S ] L [ R ]

histocompatibility 2, D region locus 1

Charge State: +3

Scan Number: 5020

File Name: 090806ptp1blivers\_M\_NC2.raw

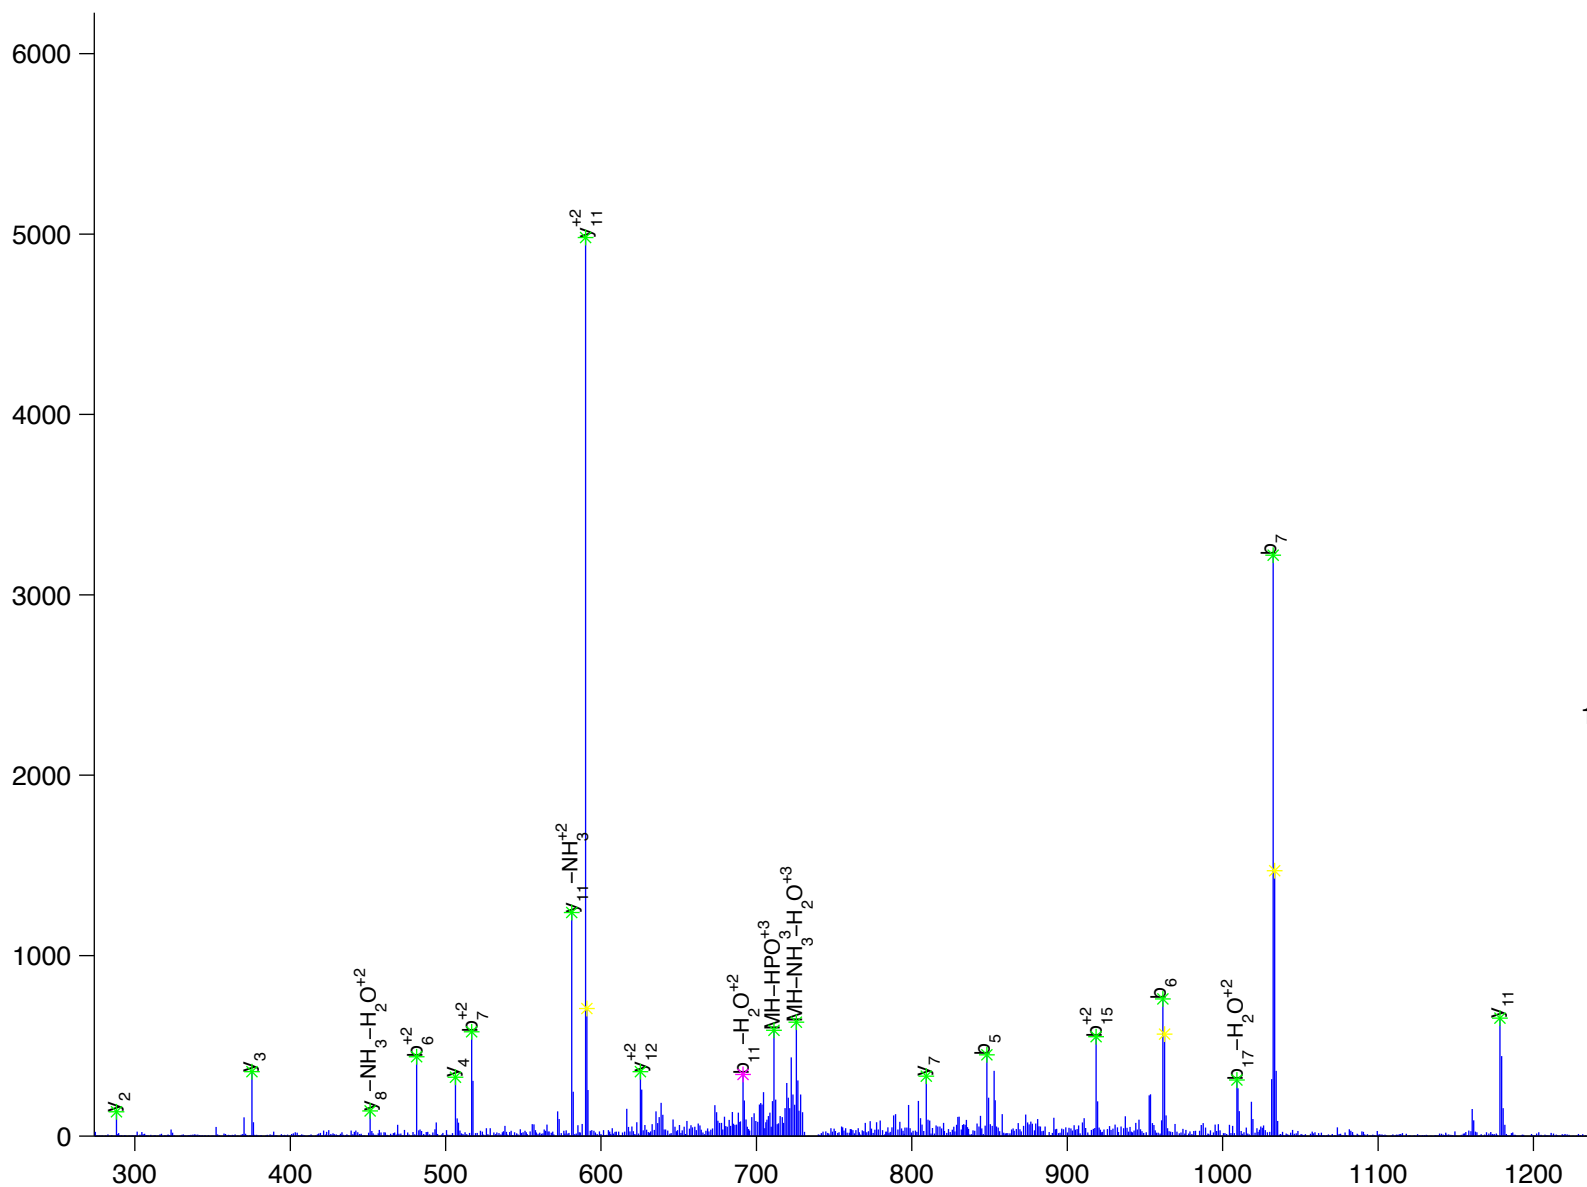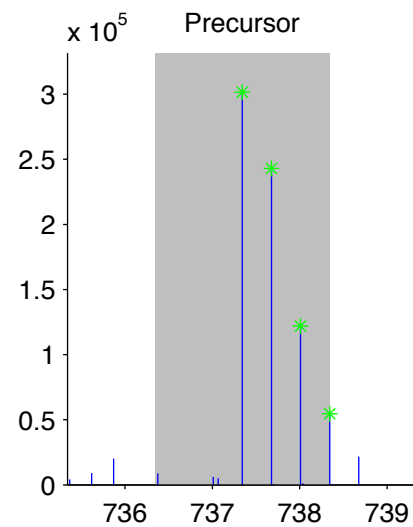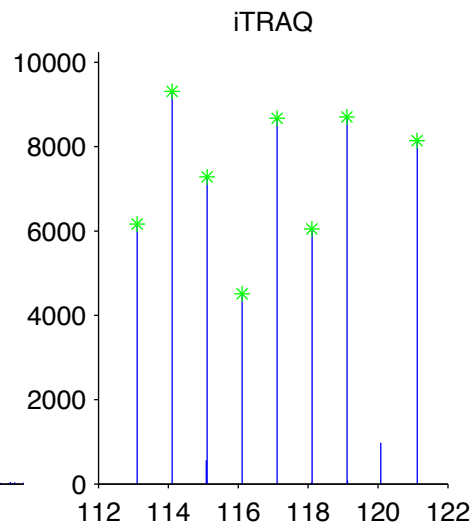

G [ G ] D [ y ] A [ L ] A [ P ] G [ S ] Q [ T ] S [ D ] L [ S ] L [ P ] D [ C ] K

histocompatibility 2, K1, K region isoform 1

Charge State: +3

Scan Number: 1453

File Name: HJ072909\_HFD\_E1\_2.raw

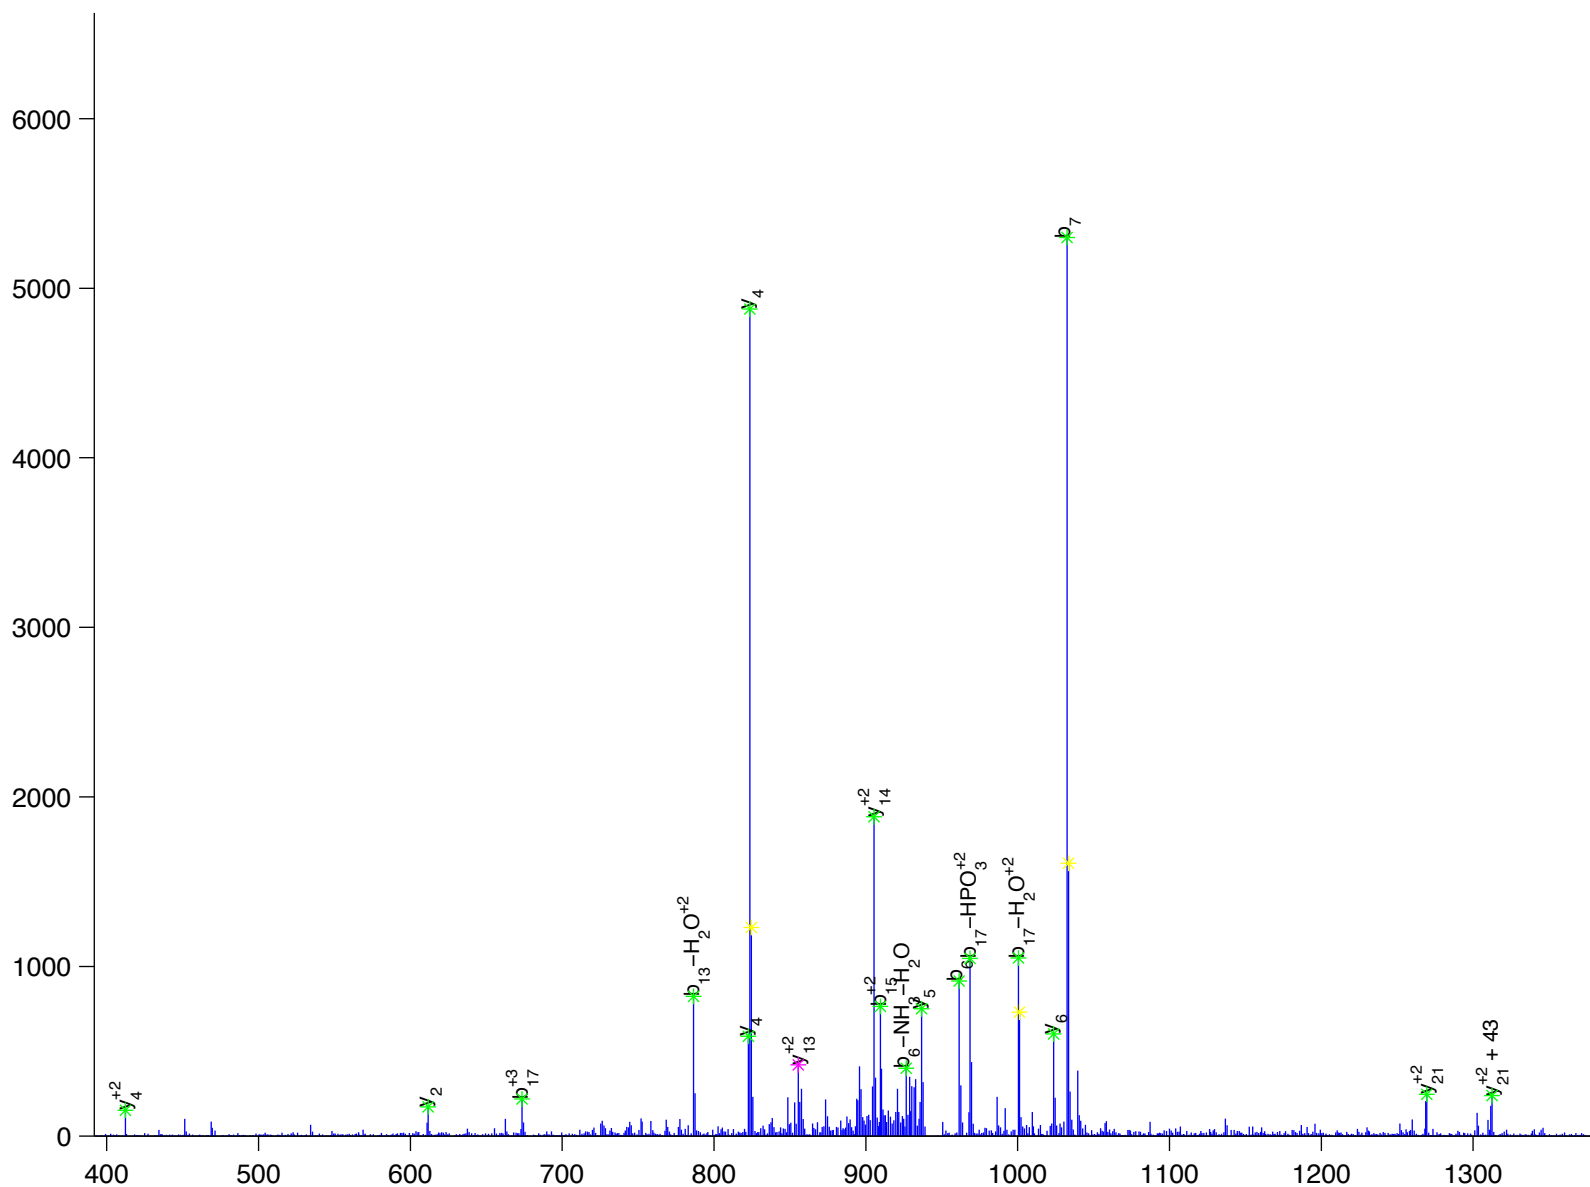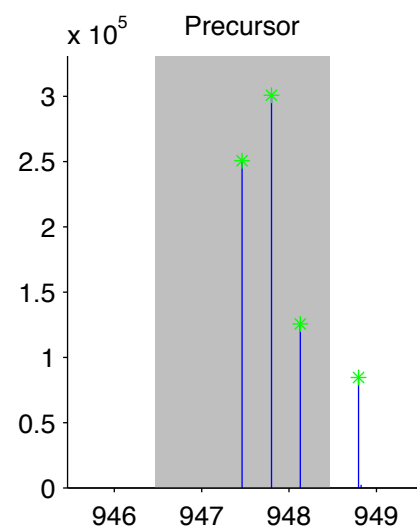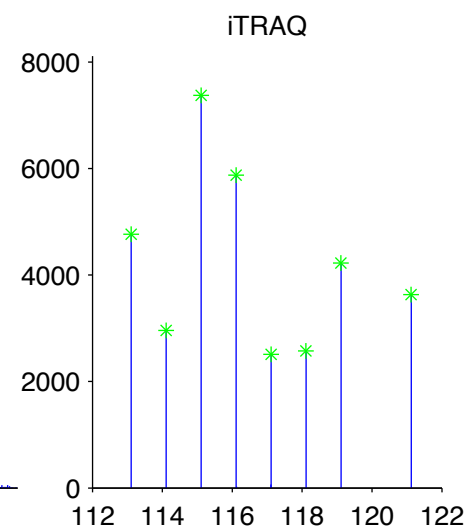

A [ V ] [ C ] [ S ] [ T ] y [ L ] [ Q ] [ S ] [ R ]

homeodomain interacting protein kinase 1  
 Charge State: +2  
 Scan Number: 3744  
 File Name: HJ072909\_HFD\_E1.raw

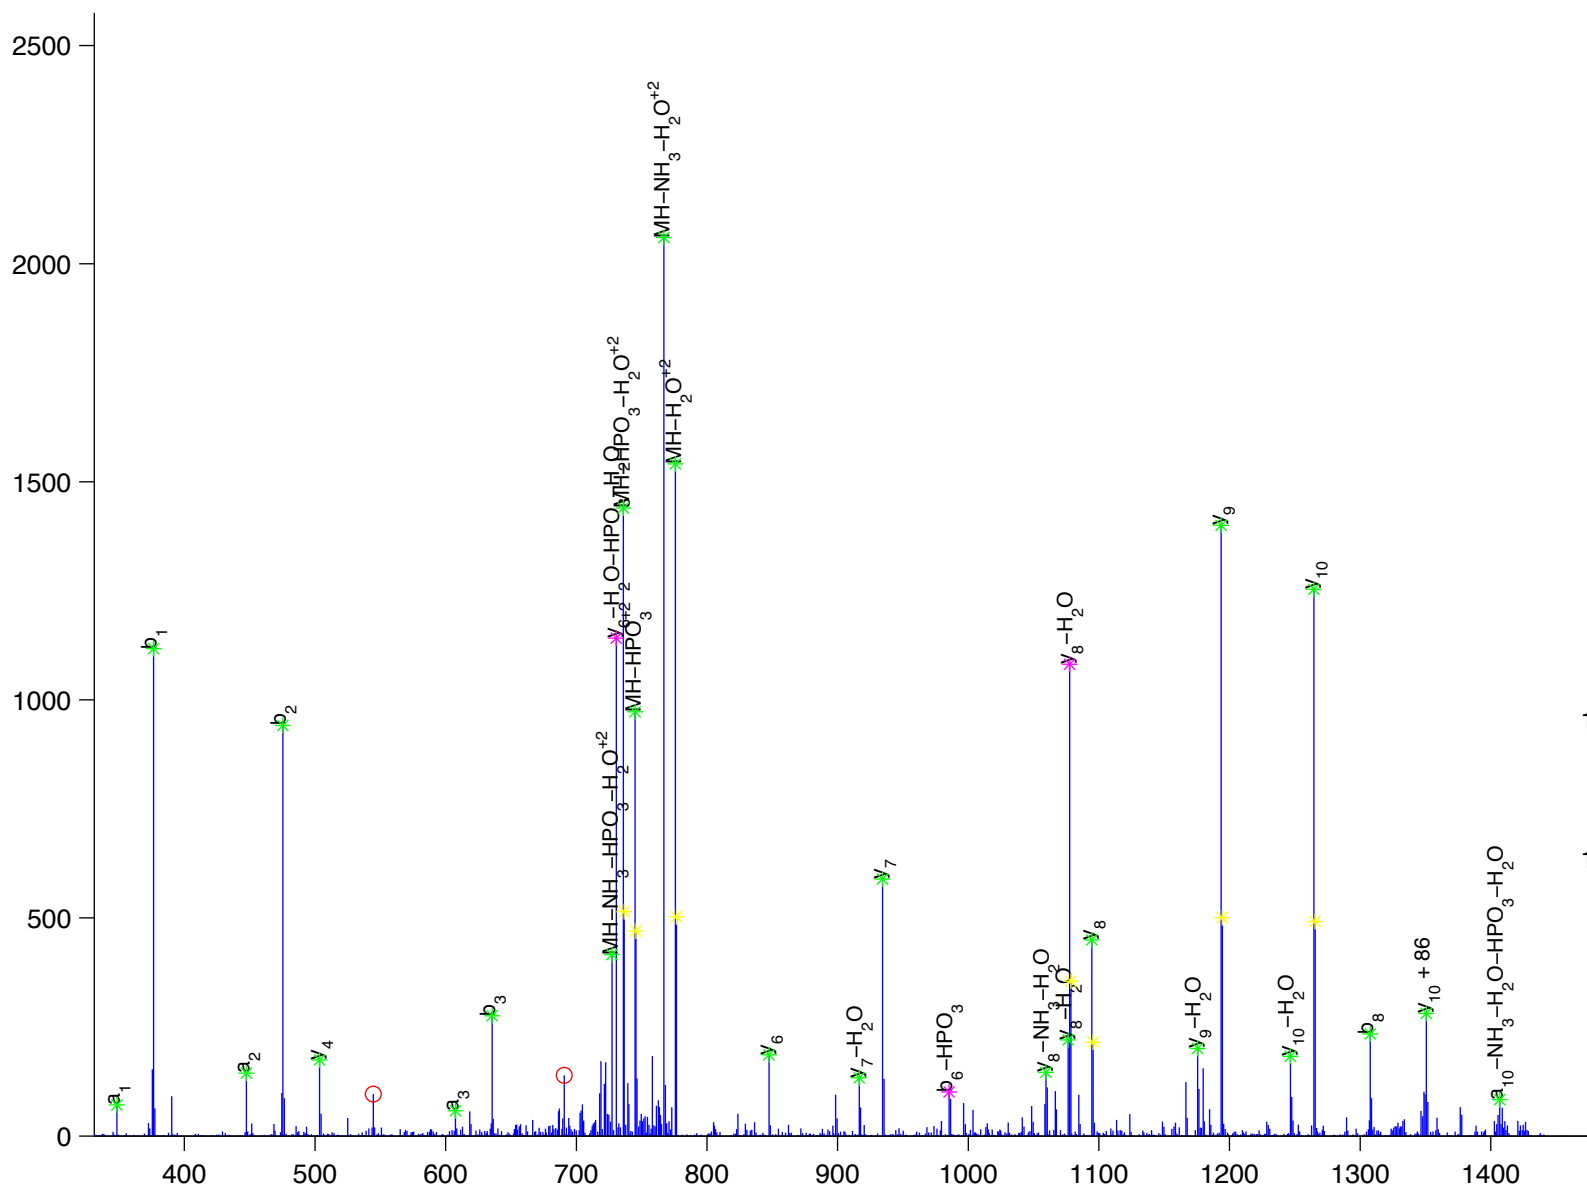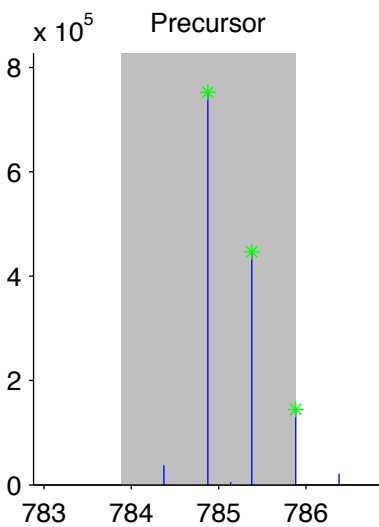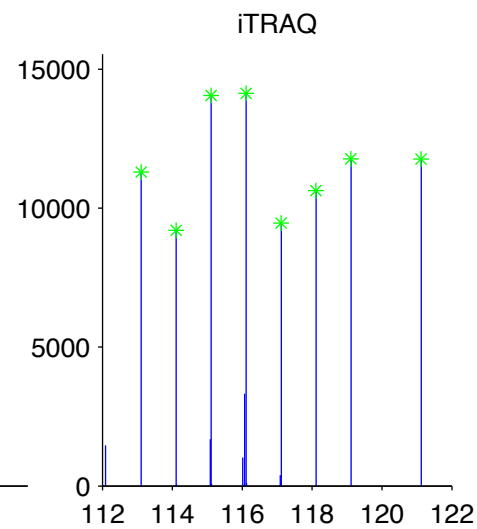

T[V]C[S]T[y]L[Q]S[R]

homeodomain interacting protein kinase 3

Charge State: +2

Scan Number: 4755

File Name: 090807ptp1blivers\_M\_HFD\_basal.raw

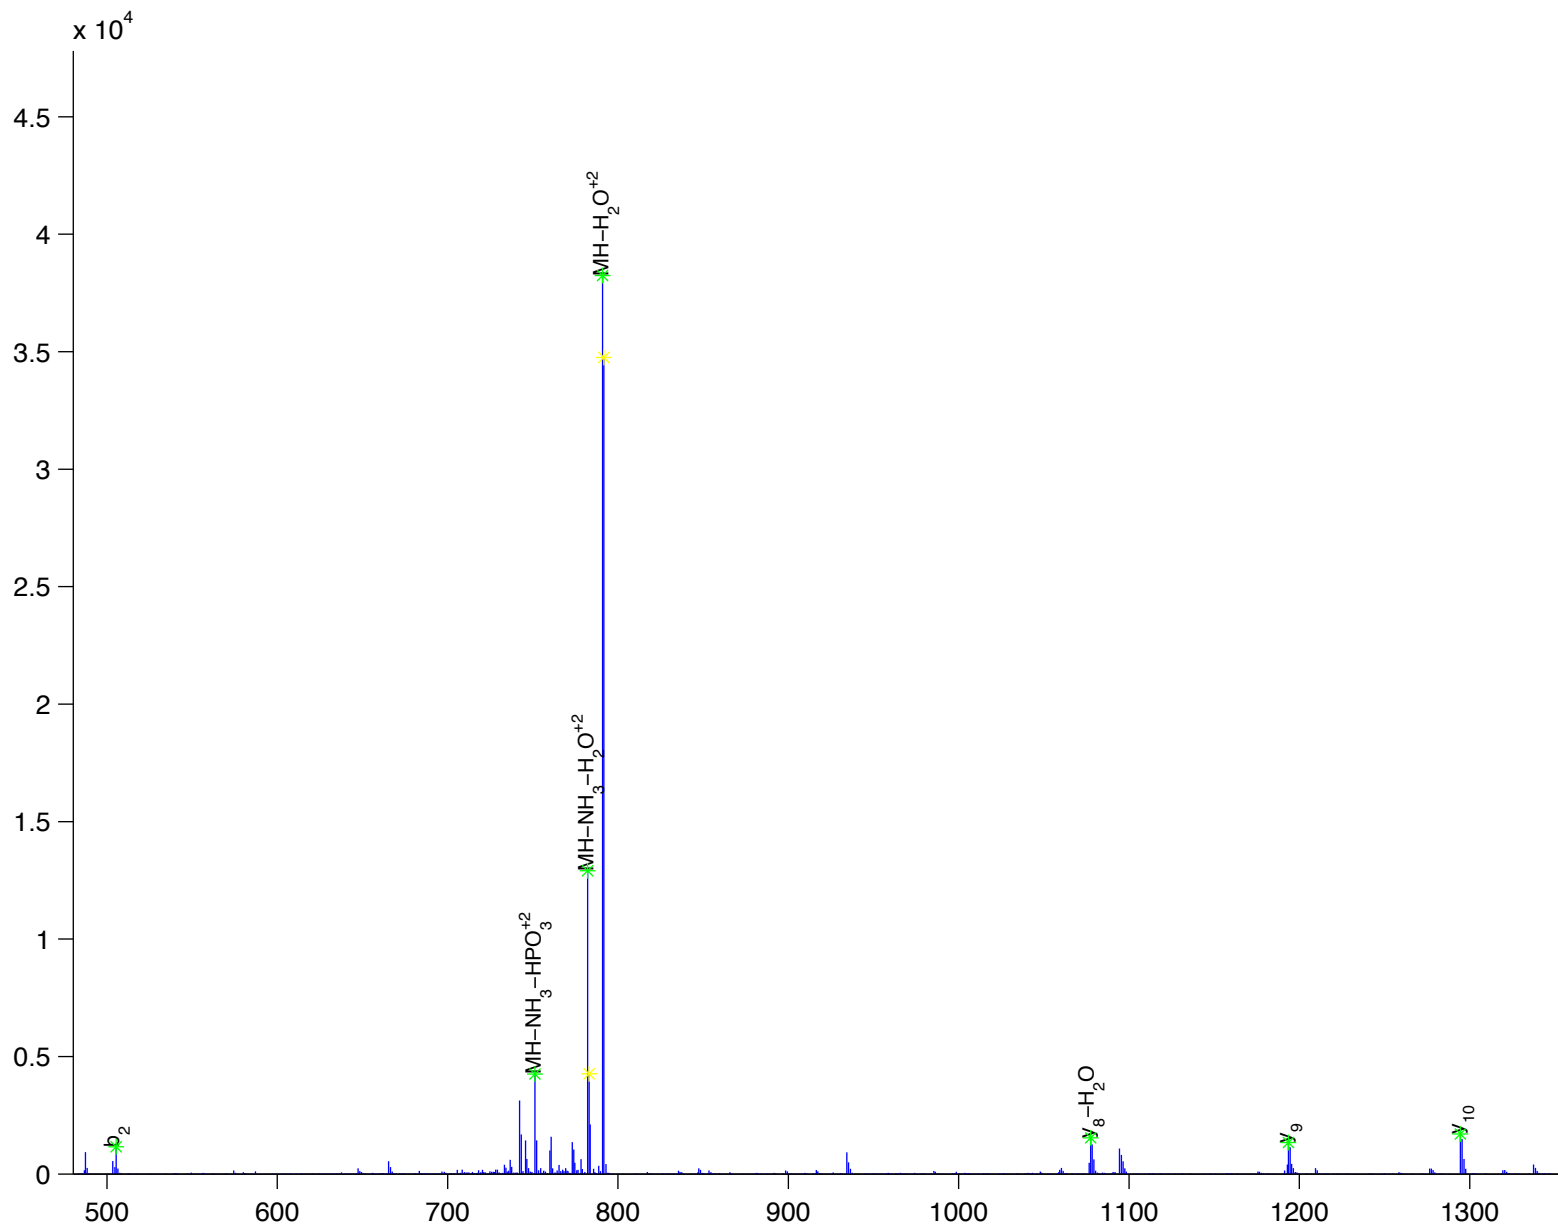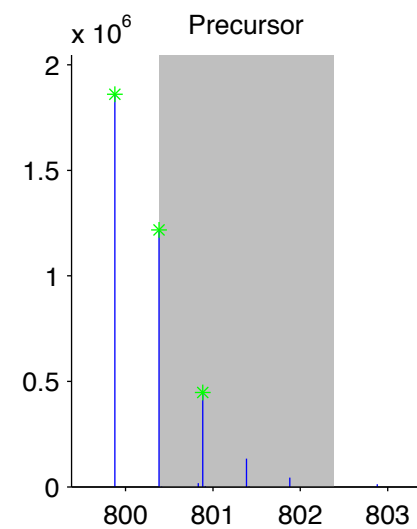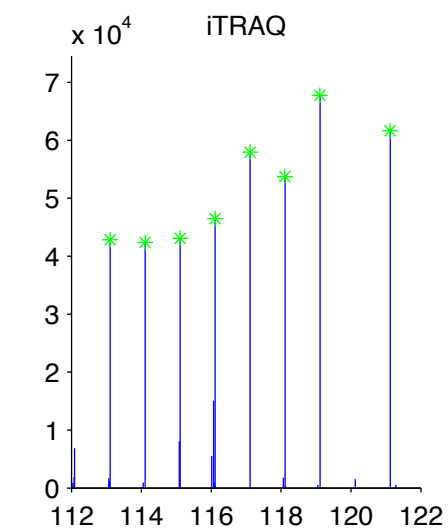

G[Q]N[N]P[Q]V[C]P[Y]N[L]y[A]E[Q]L[S]G[S]A[F]T[C]P[R]

homogentisate 1, 2-dioxygenase

Charge State: +3

Scan Number: 7018

File Name: 091130ptp1blivers\_hfd\_basal2.raw

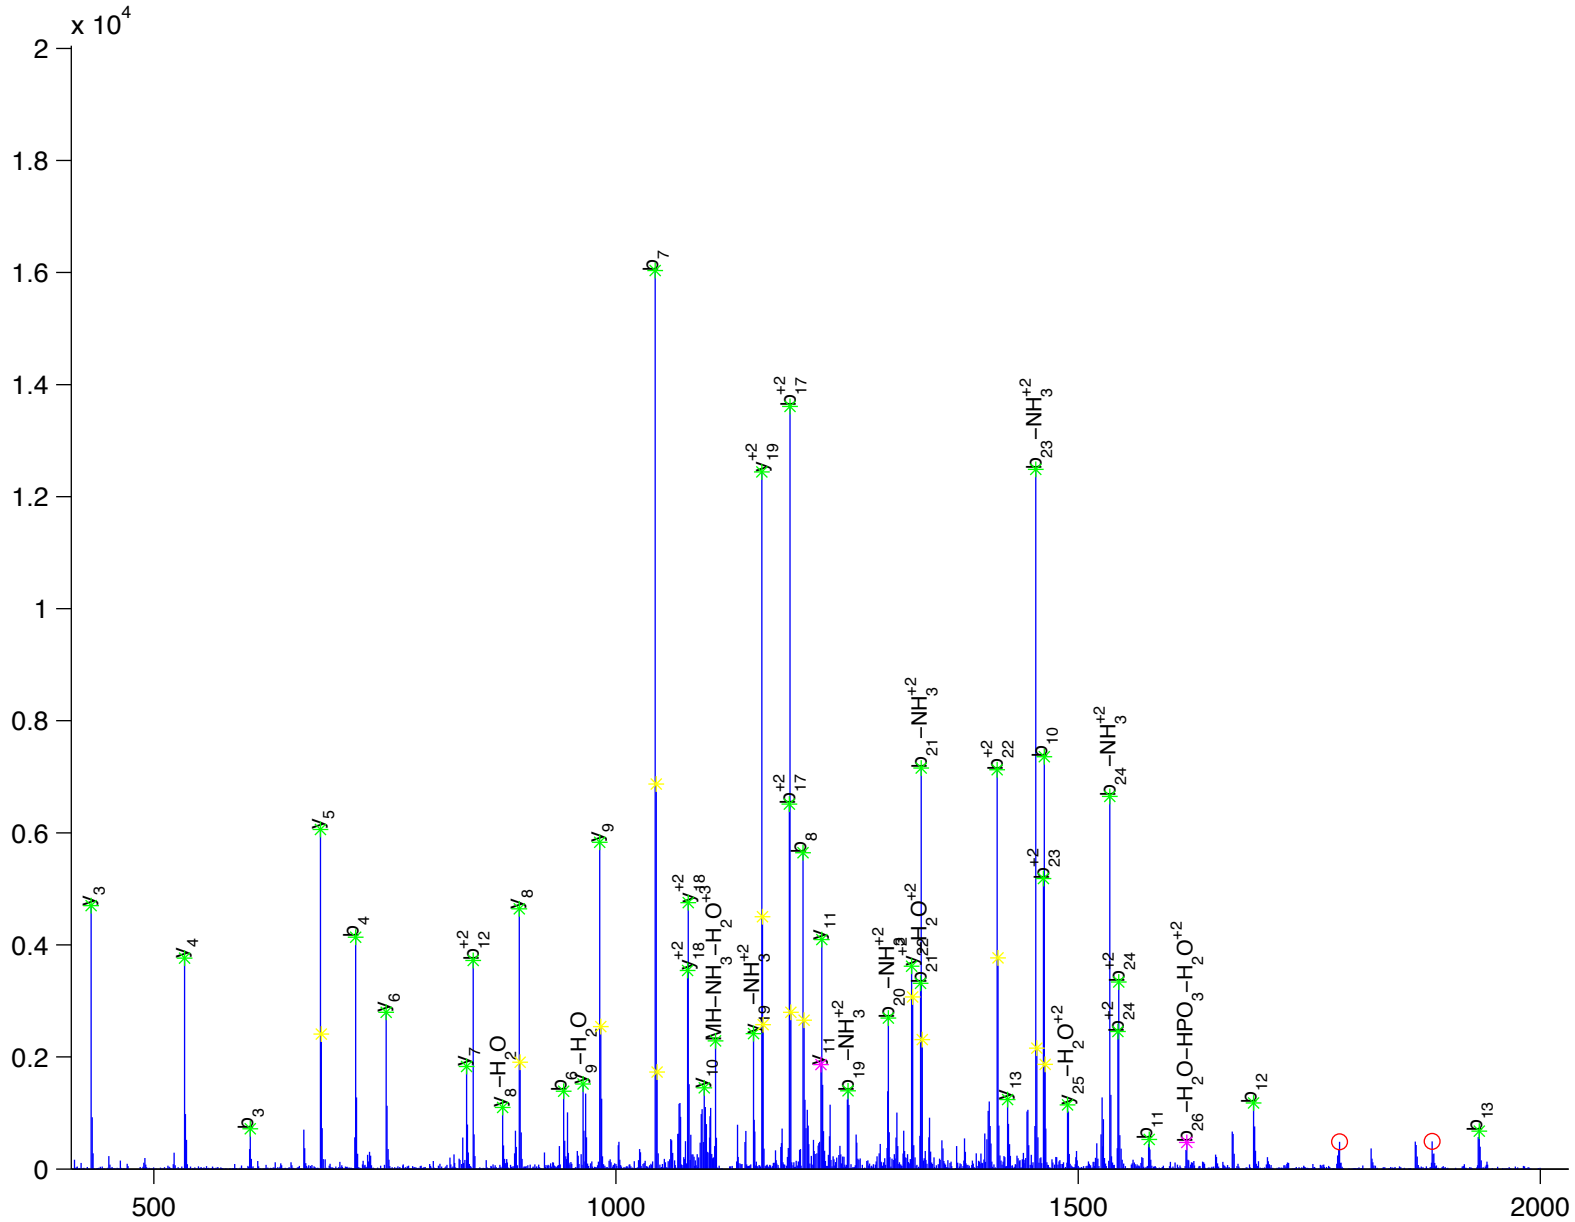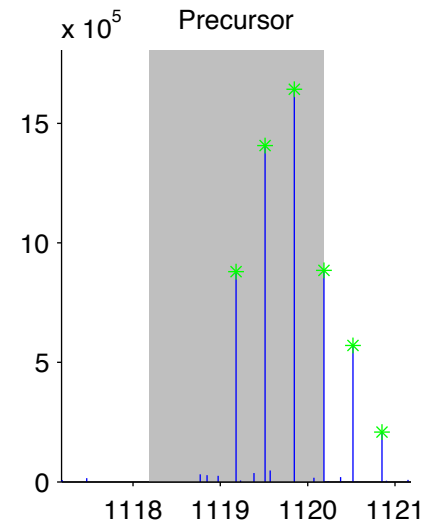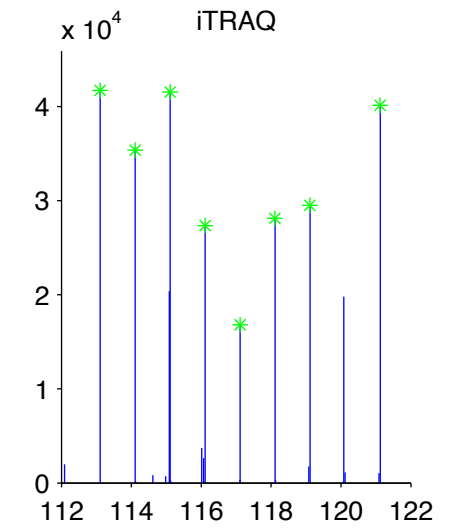

T [ E ] V [ P ] y [ E ] E [ L ] W [ L ] E [ E ] G [ K ] P [ S ] R

hypothetical protein LOC381126

Charge State: +3

Scan Number: 7028

File Name: 090806ptp1blivers\_M\_NC2.raw

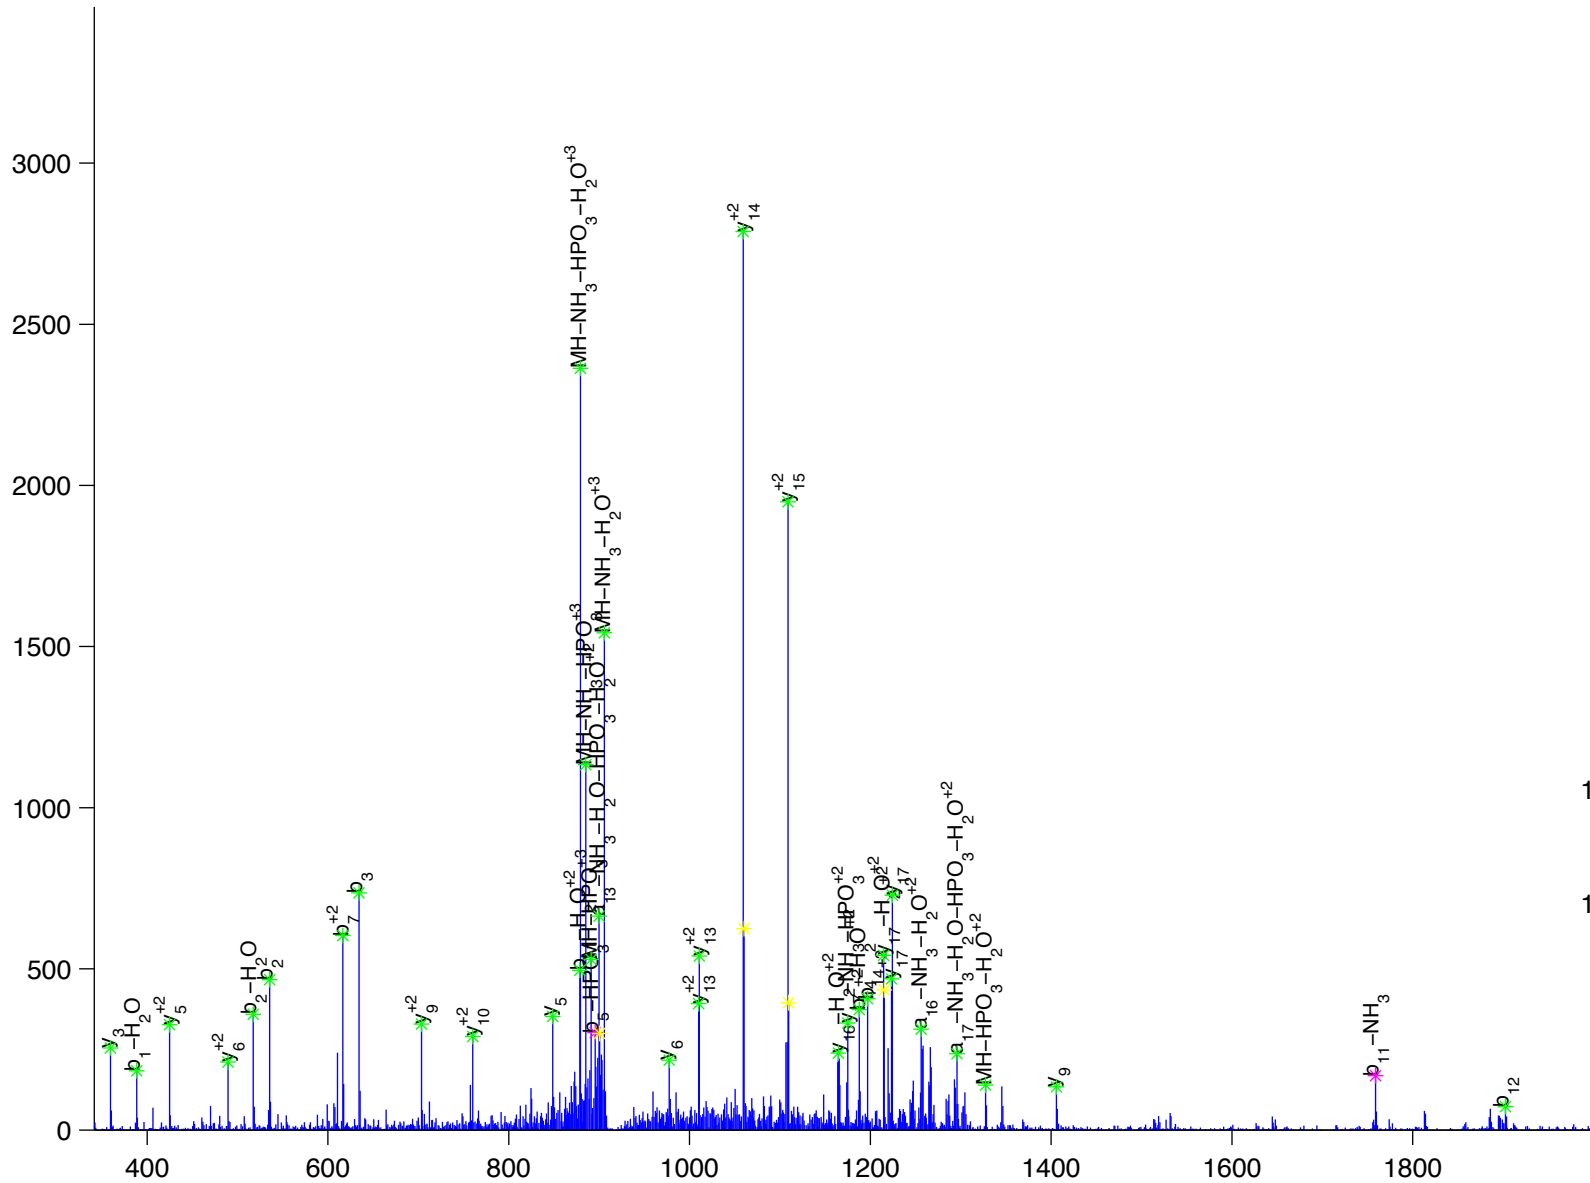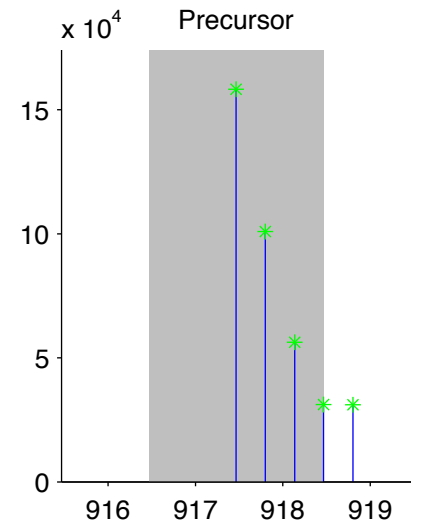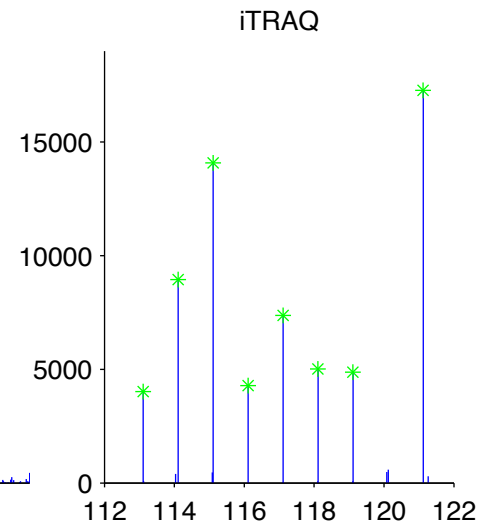



T[S]N[S]T[S]E[E]S[D]L[H]y[A]D[I]H[V]L[R]

hypothetical protein LOC66952

Charge State: +4

Scan Number: 5956

File Name: 100908ptp1blivers\_ncHFD3\_basal.raw

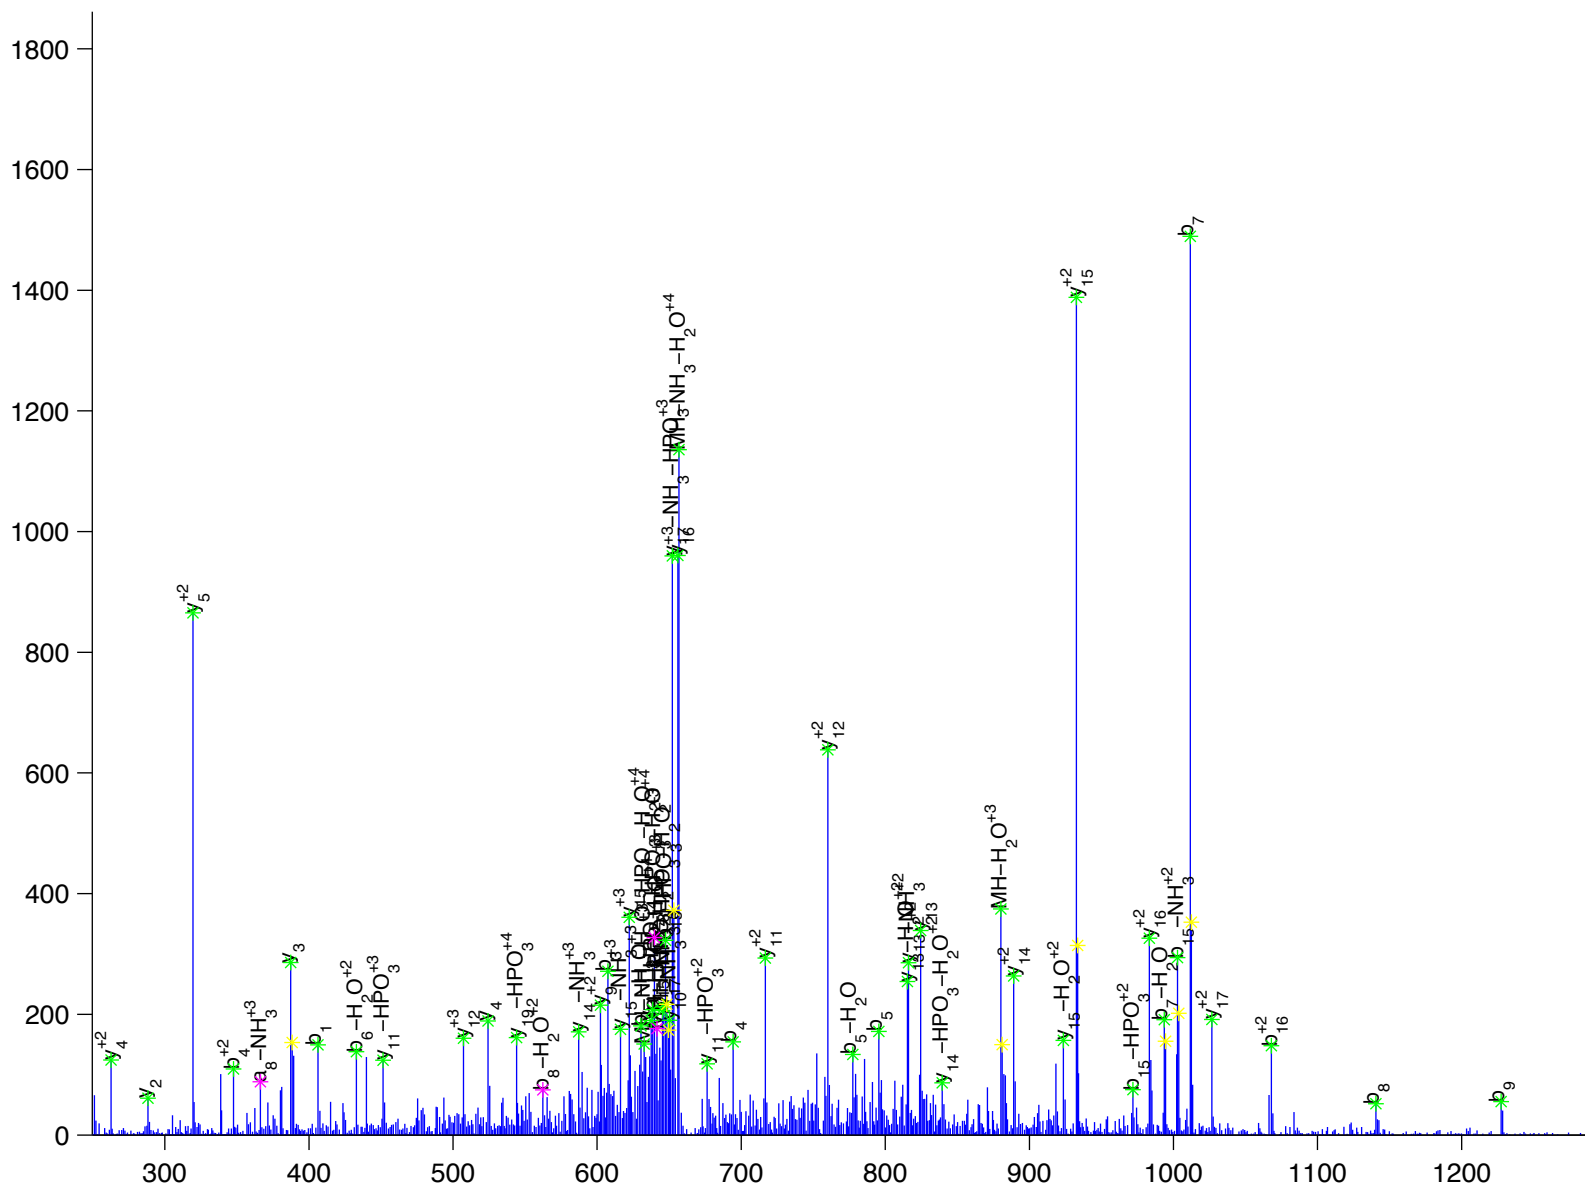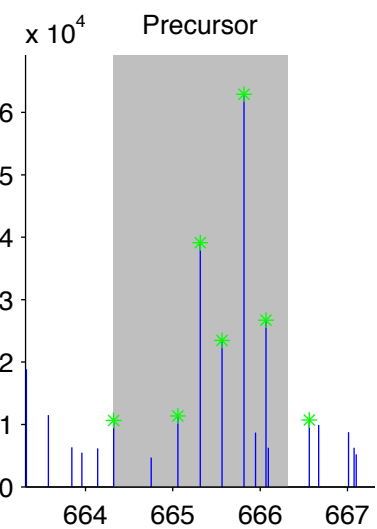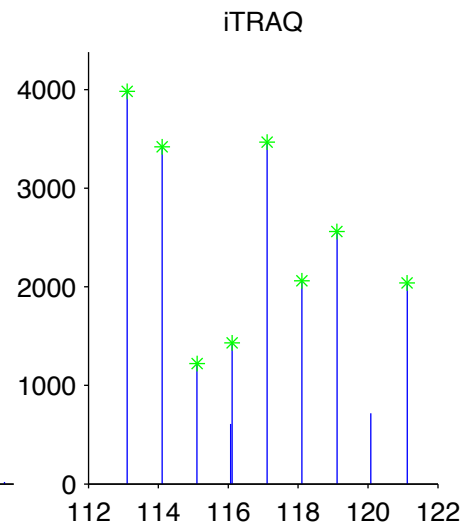

I [G] I [V] G [G] C [Q] E [y] T [G] A [P] Y [F] A [G] I [S] A [L] K

hypothetical protein LOC69225

Charge State: +4

Scan Number: 8507

File Name: 091130ptp1blivers\_hfd\_basal2.raw

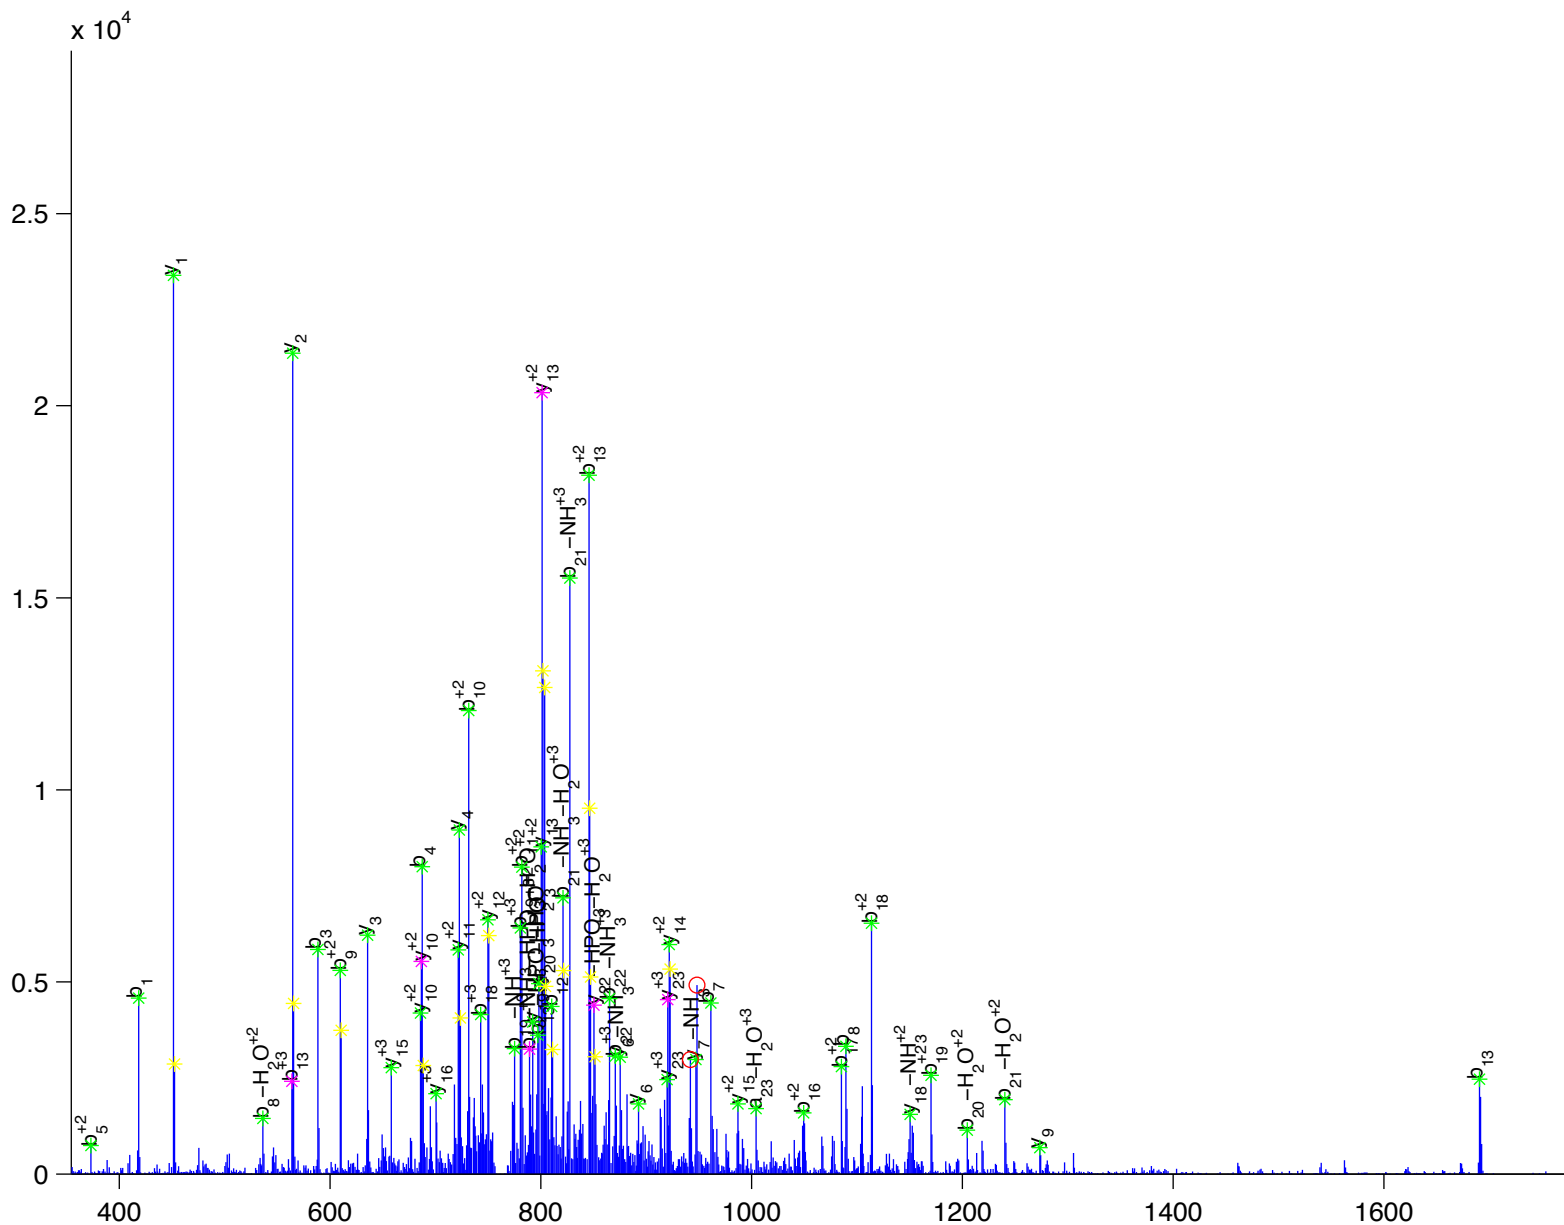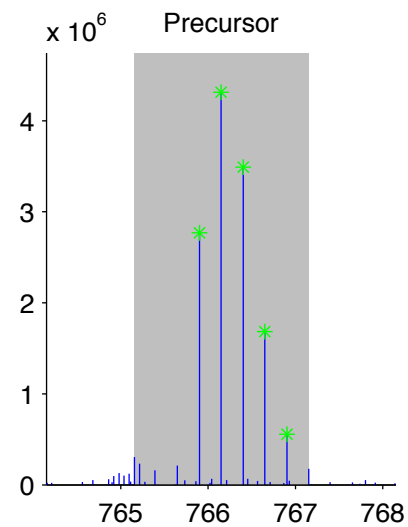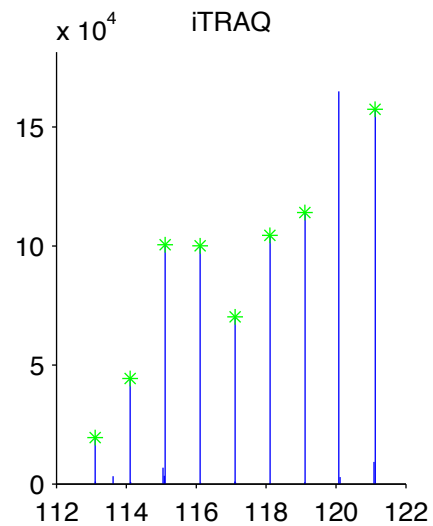

Y [ y ] K [ E ] T [ S ] G [ L ] M [ L ] D [ V ] G [ G ] Y [ M ] K

hypothetical protein LOC76429

Charge State: +4

Scan Number: 8132

File Name: 090806ptp1blivers\_M\_NC2.raw

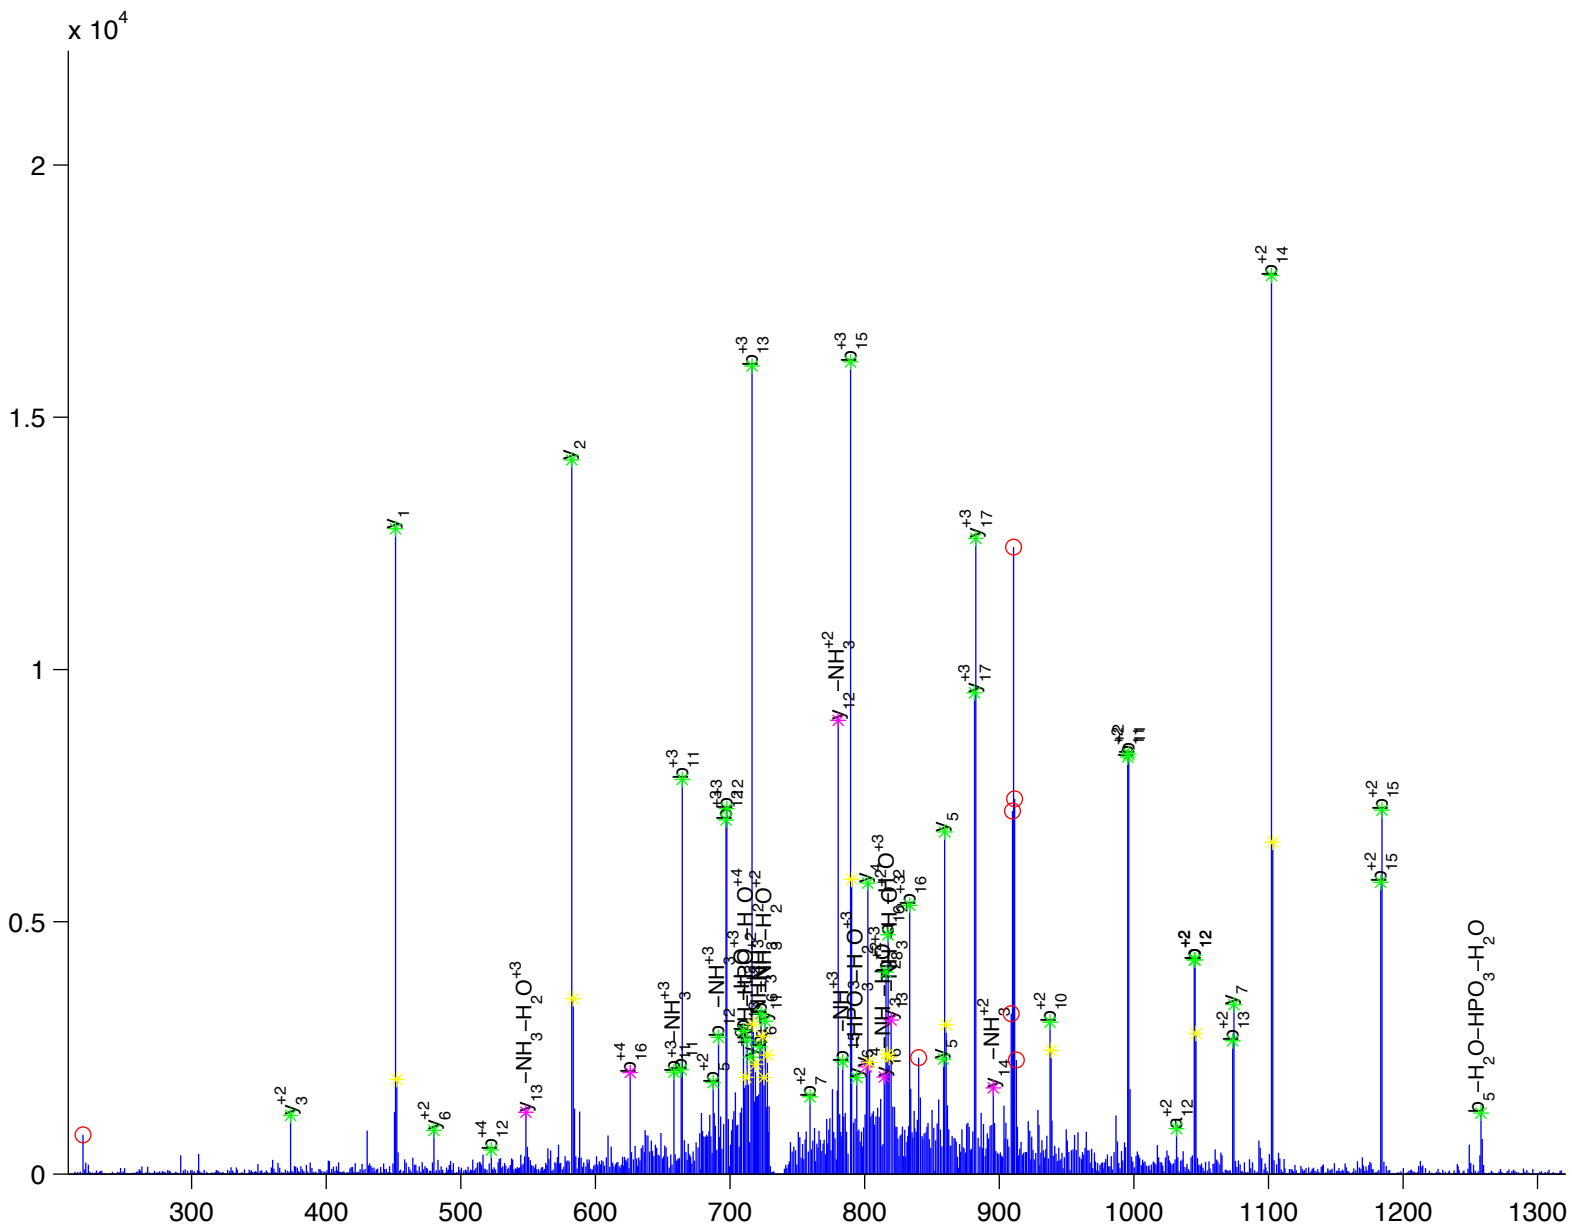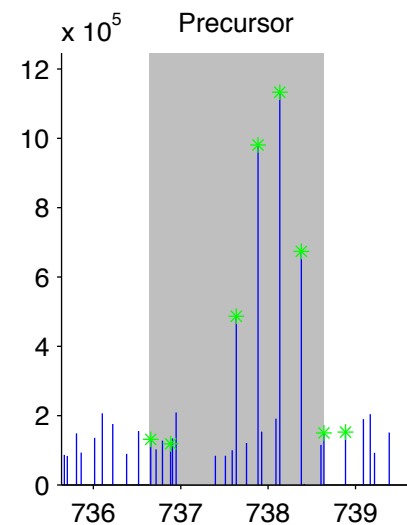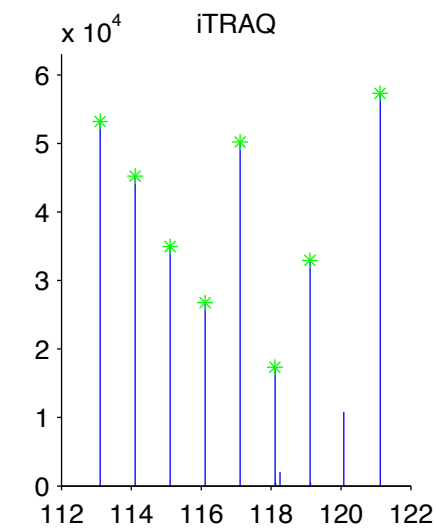

E I I V T D y T P Q N L Q E L Q K

indolethylamine N-methyltransferase

Charge State: +3

Scan Number: 7064

File Name: 091130ptp1blivers\_hfd\_basal2.raw

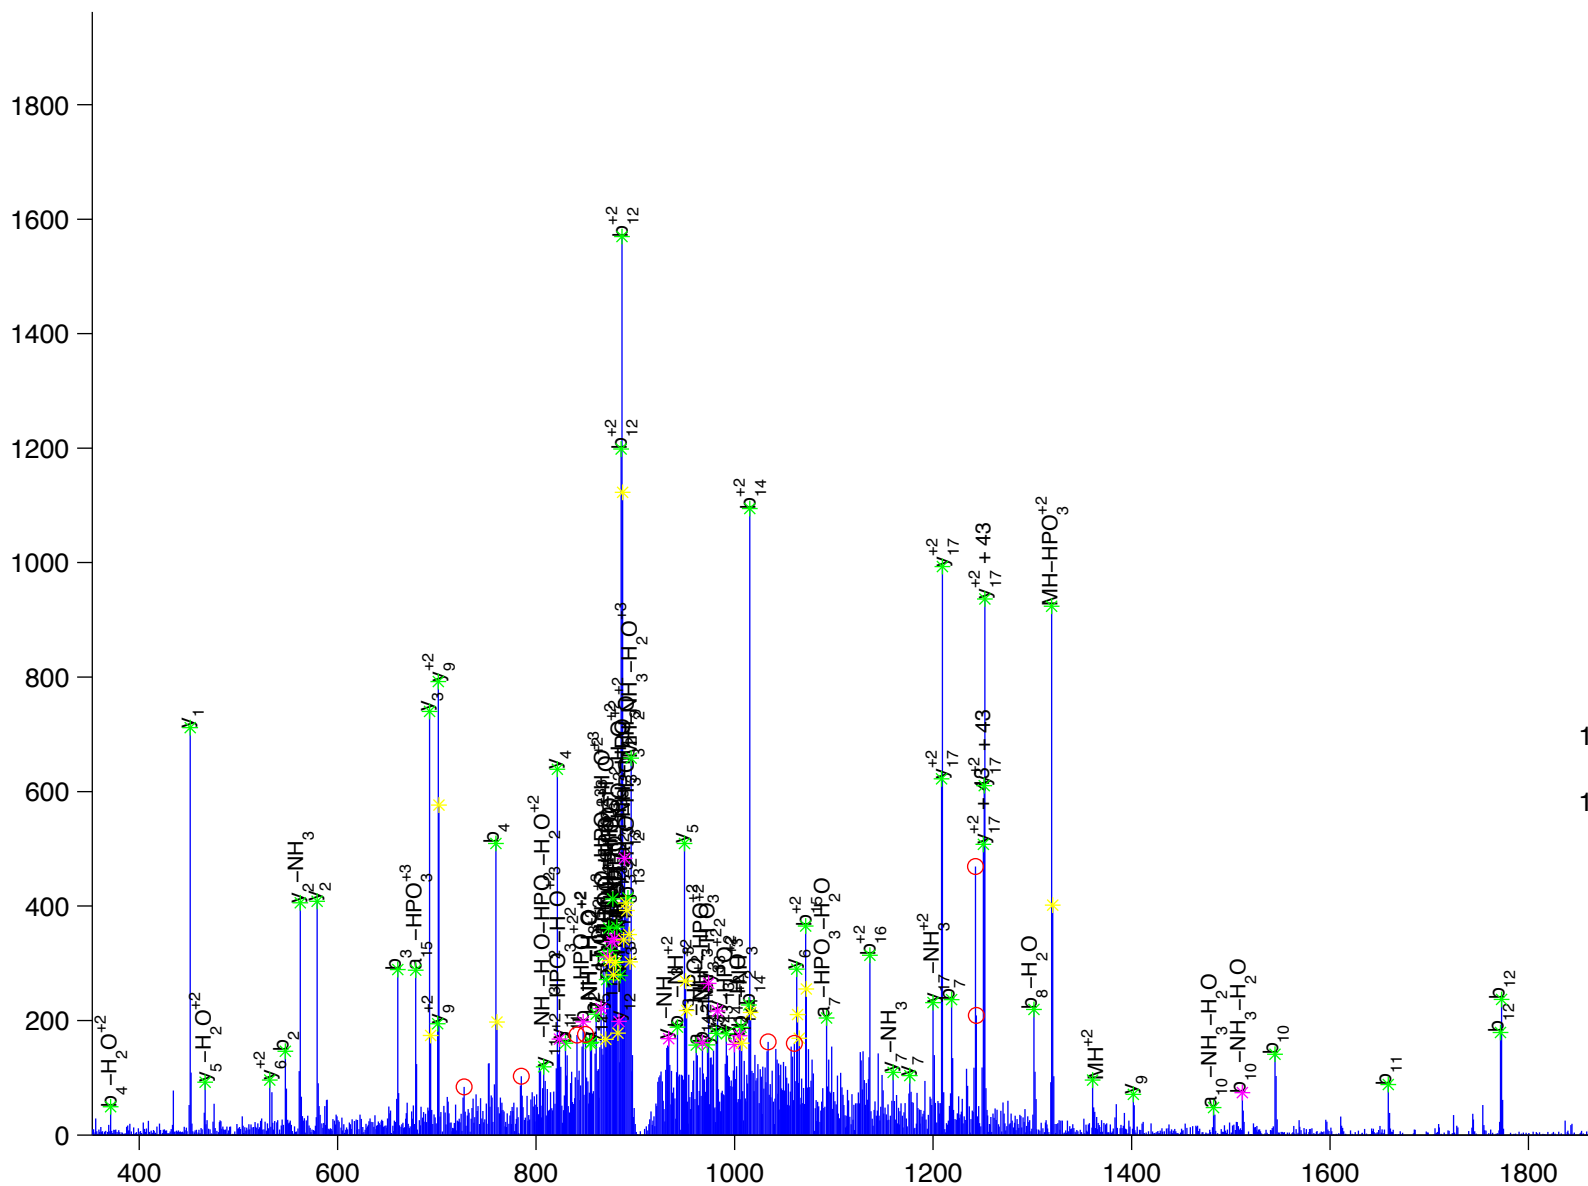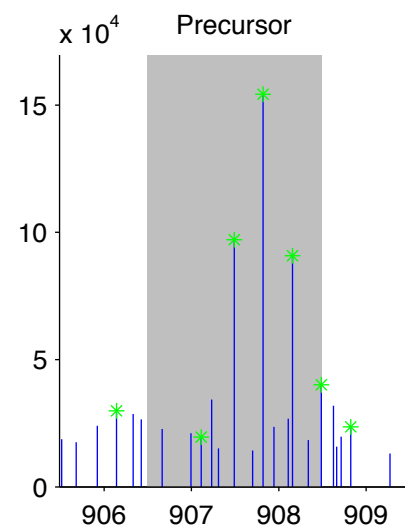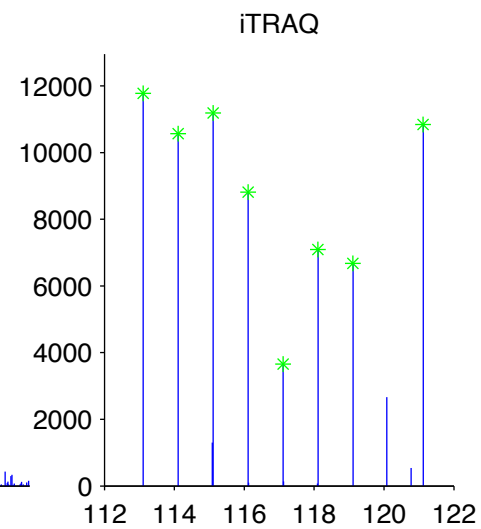

T L S E V D y A P G P G R

inositol polyphosphate phosphatase-like 1

Charge State: +2

Scan Number: 4518

File Name: 090806ptp1blivers\_M\_NC2.raw

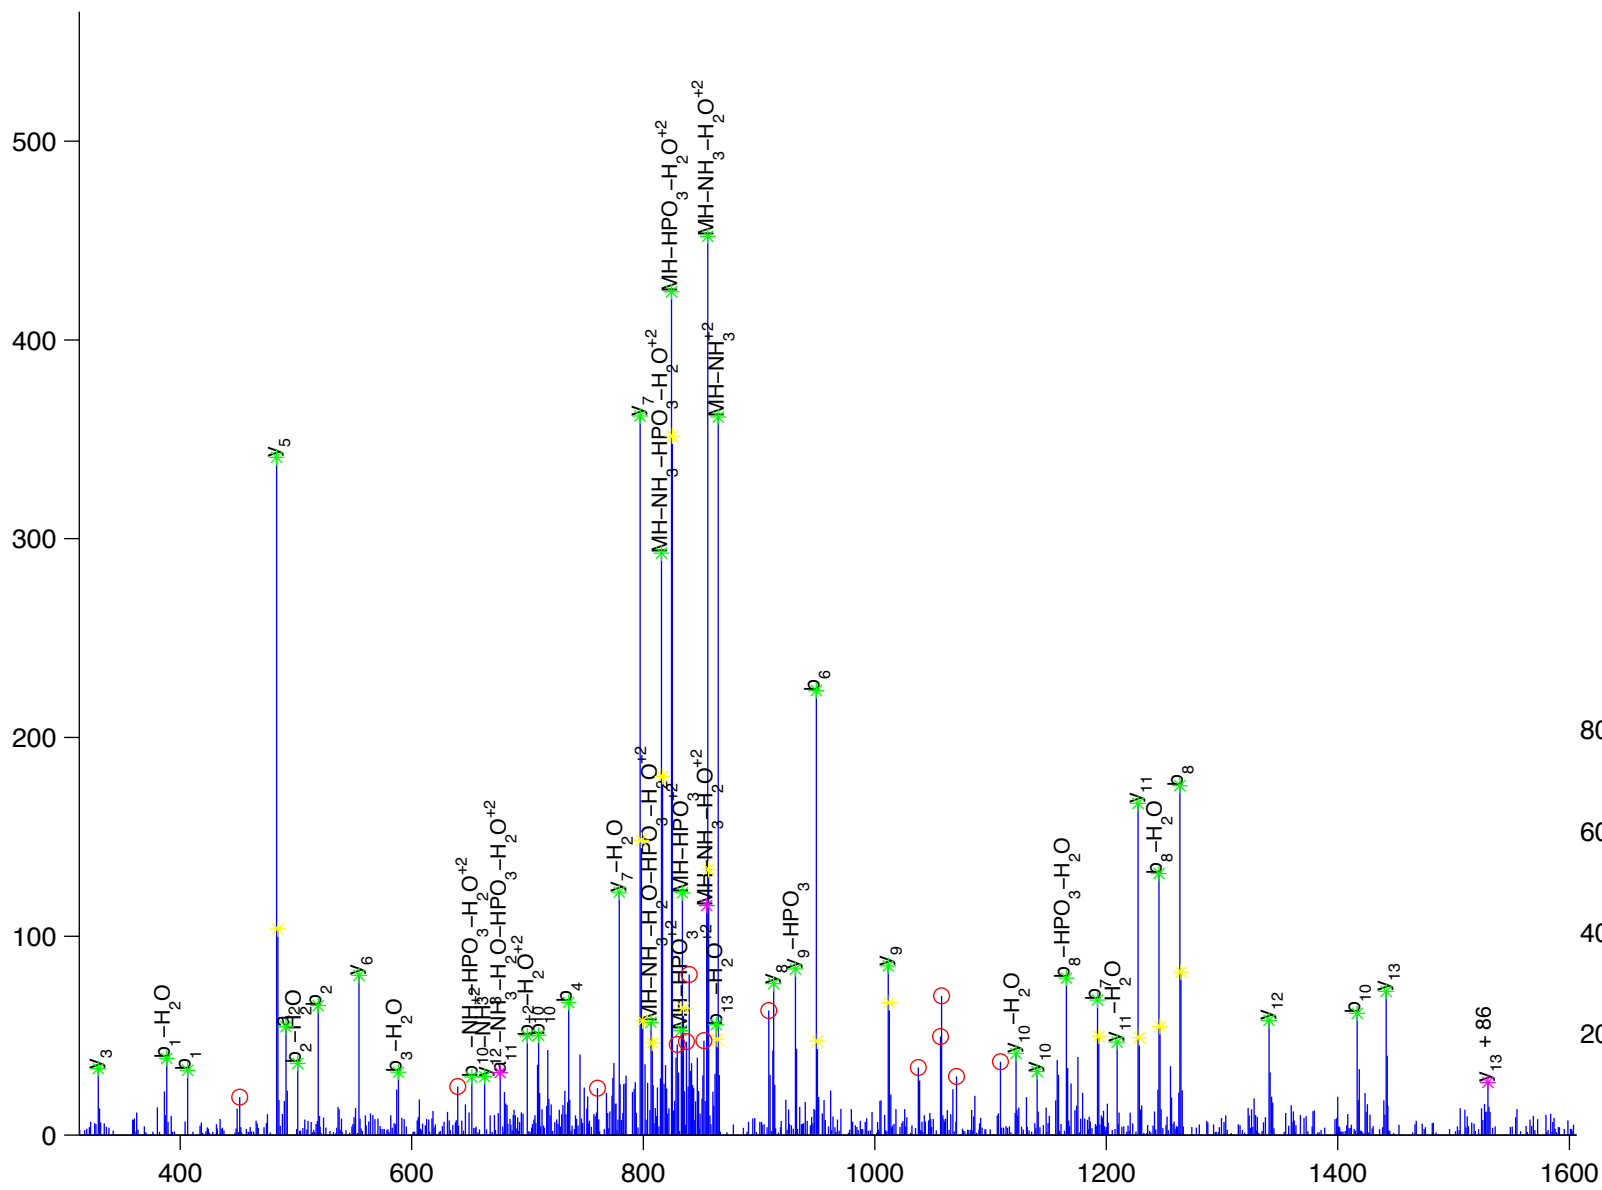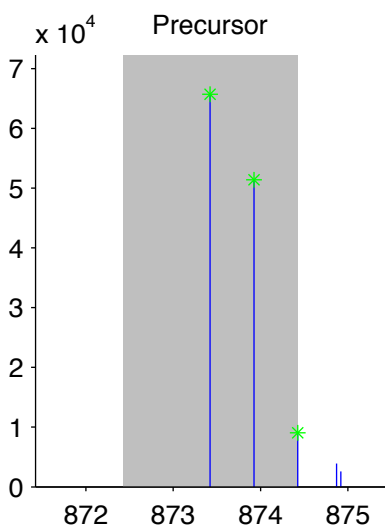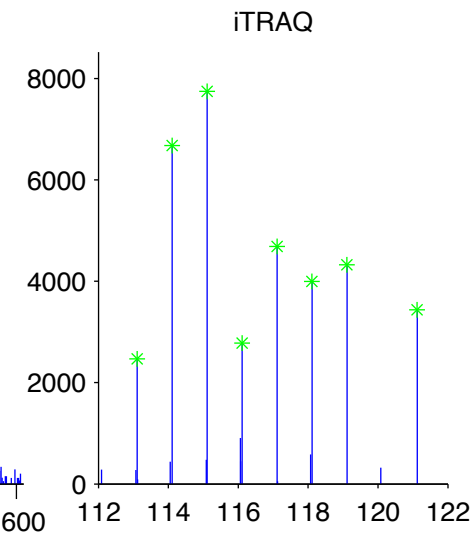

D [ I ] y [ E ] T [ D ] y [ Y ] R [ K ]

insulin receptor

Charge State: +3

Scan Number: 4193

File Name: 090728ptp1blivers\_M\_NC\_ins\_e.raw

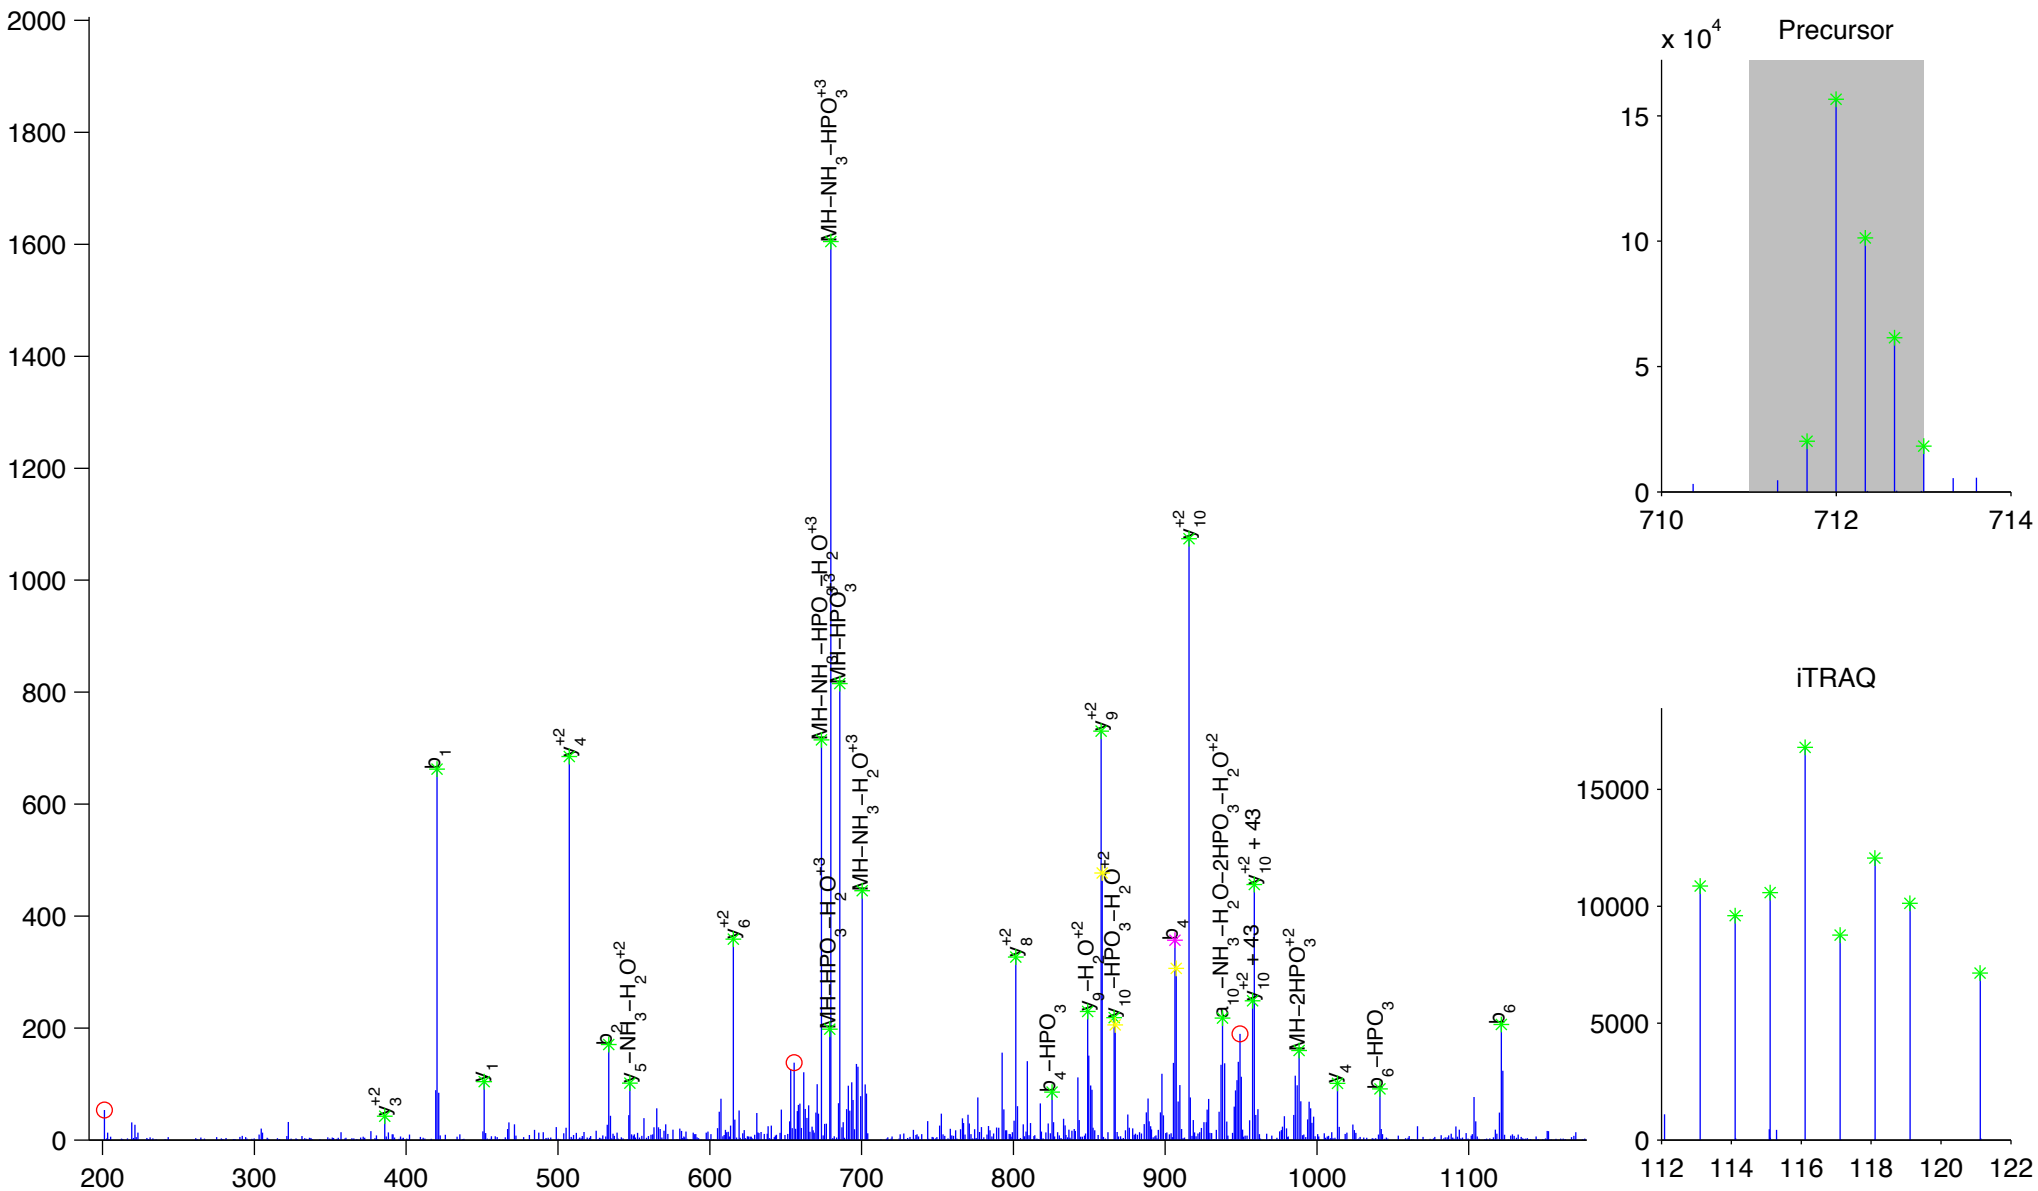

D I y E T D Y Y R

insulin receptor

Charge State: +2

Scan Number: 4485

File Name: 090806ptp1blivers\_M\_NC2.raw

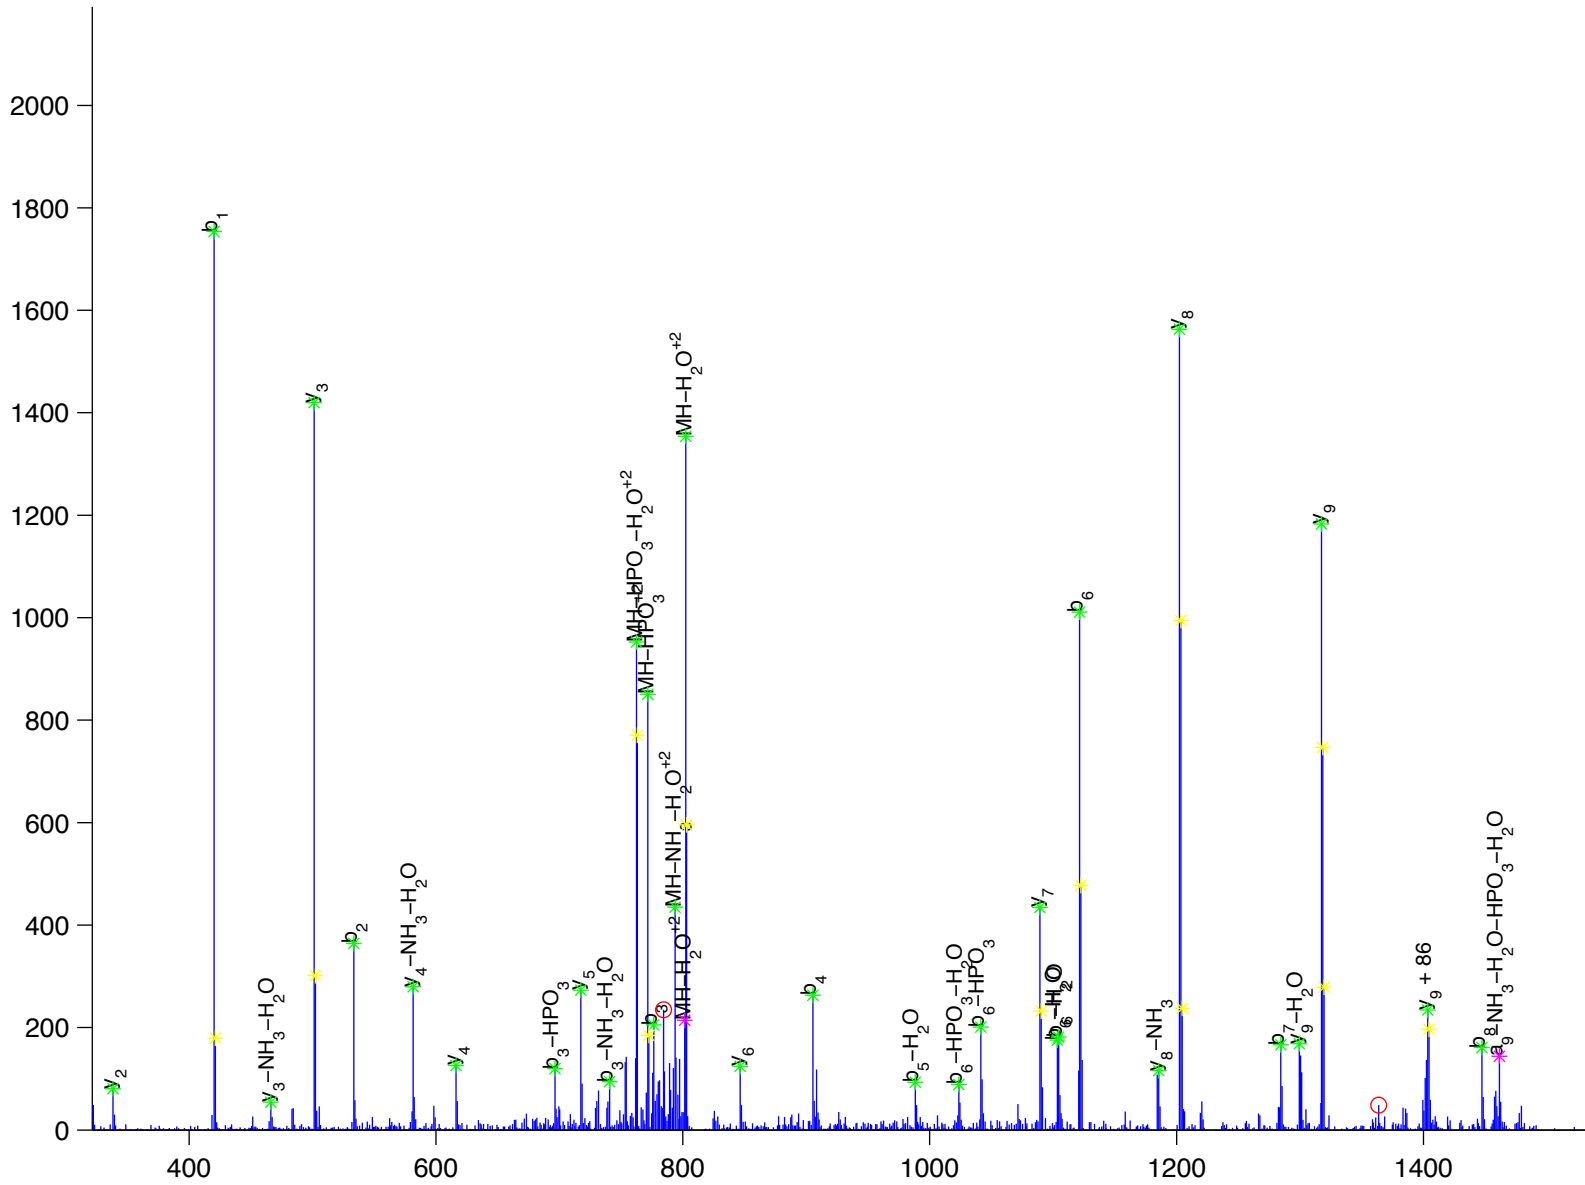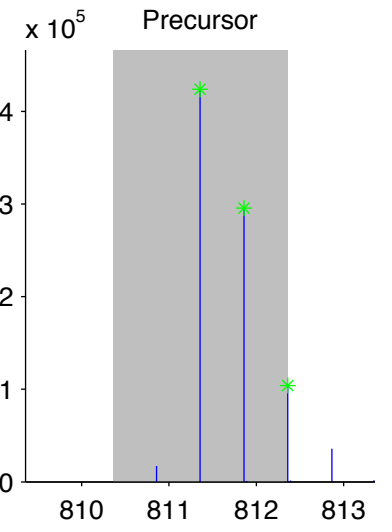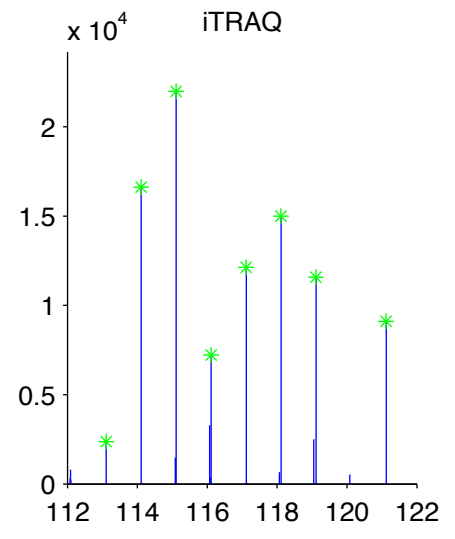

D I Y E T D y Y R

insulin receptor

Charge State: +2

Scan Number: 4485

File Name: 090806ptp1blivers\_M\_NC2.raw

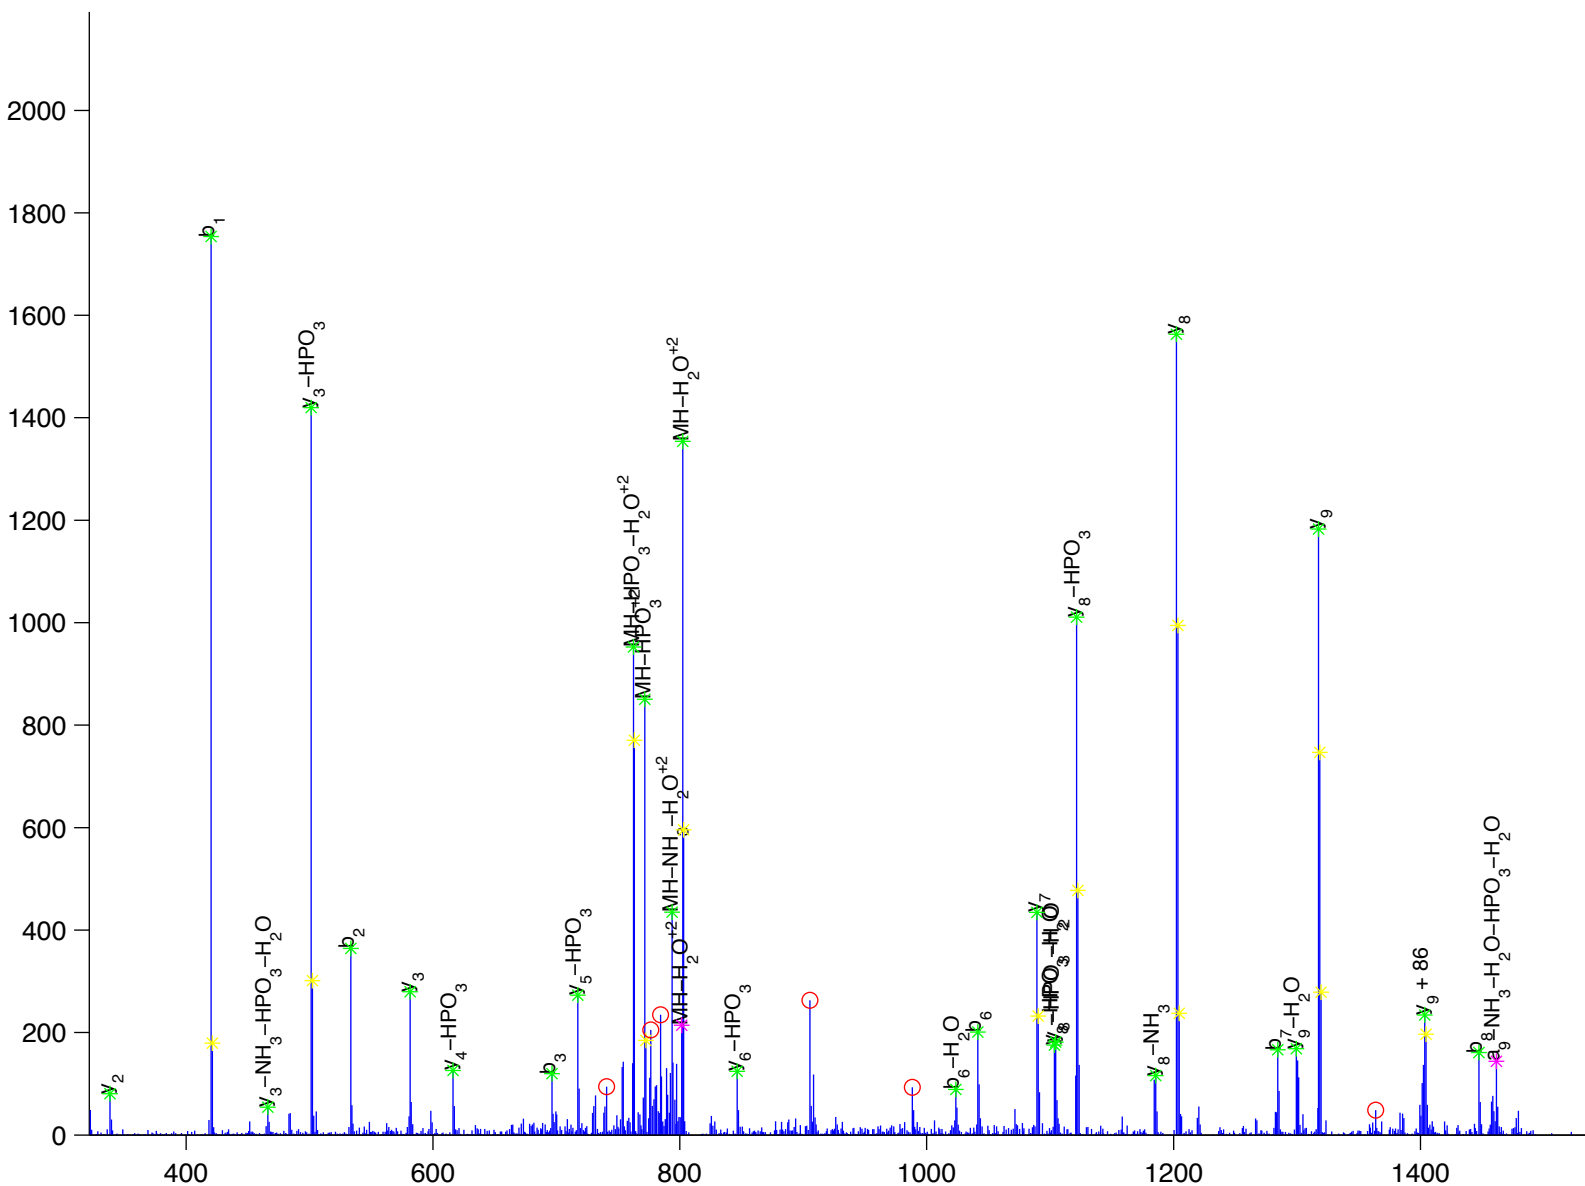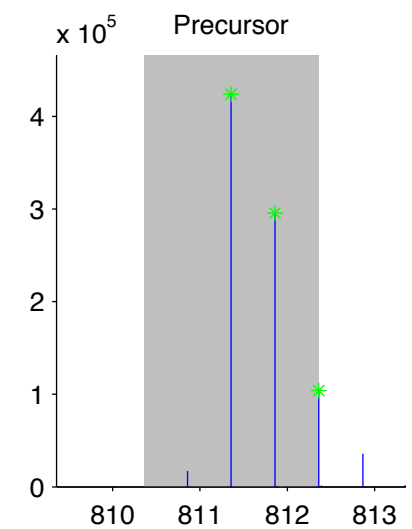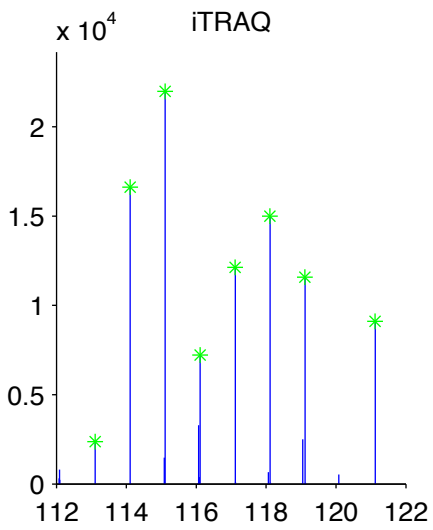



G[E]E[E]L[S]N[y]I[C]M[G]G[K]

insulin receptor substrate 1

Charge State: +3

Scan Number: 4877

File Name: 090728ptp1blivers\_M\_NC\_ins\_e.raw

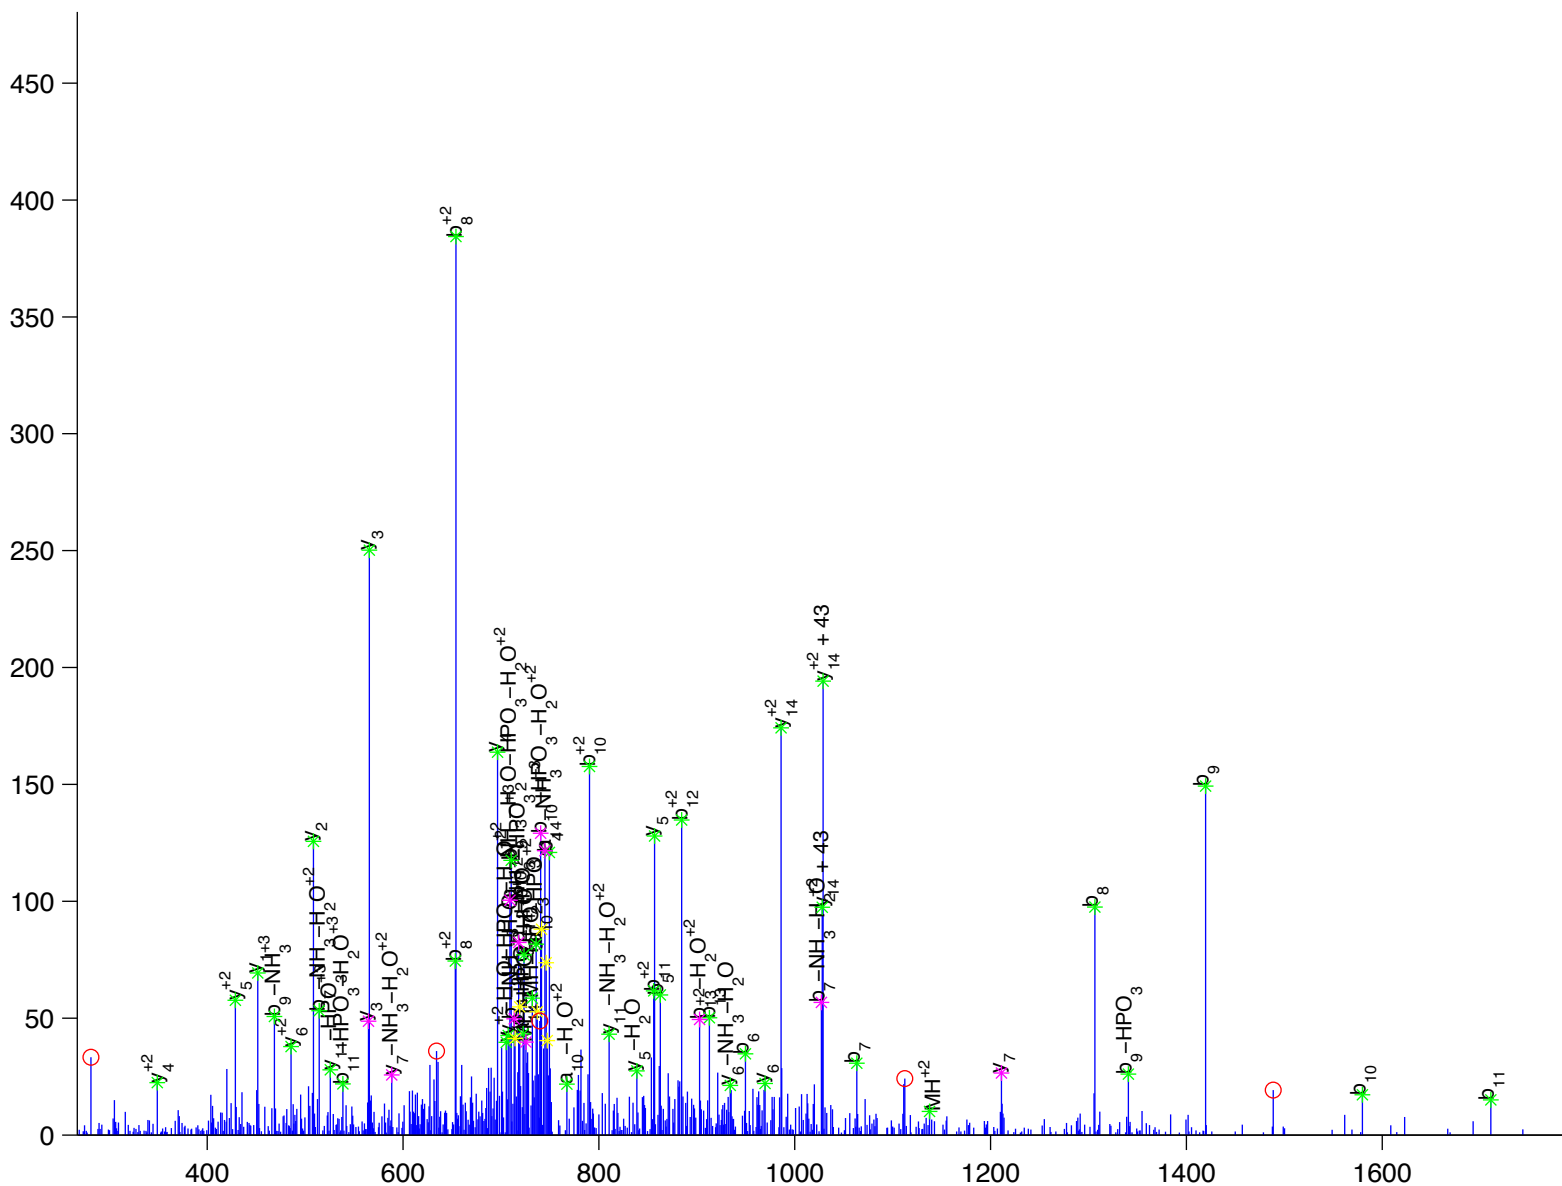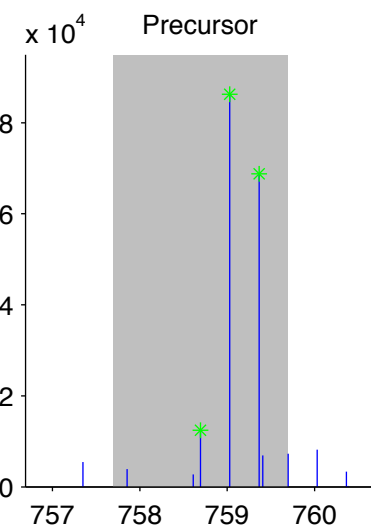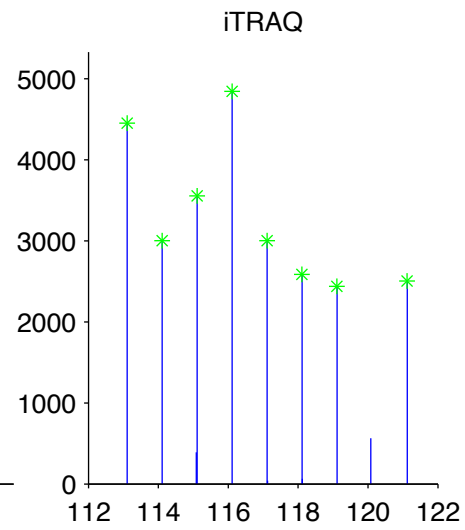

E [ E ] T [ G ] S [ E ] E [ y ] M [ N ] M [ D ] L [ G ] P [ G ] R

insulin receptor substrate 1

Charge State: +3

Scan Number: 5251

File Name: 090806ptp1blivers\_M\_NC2.raw

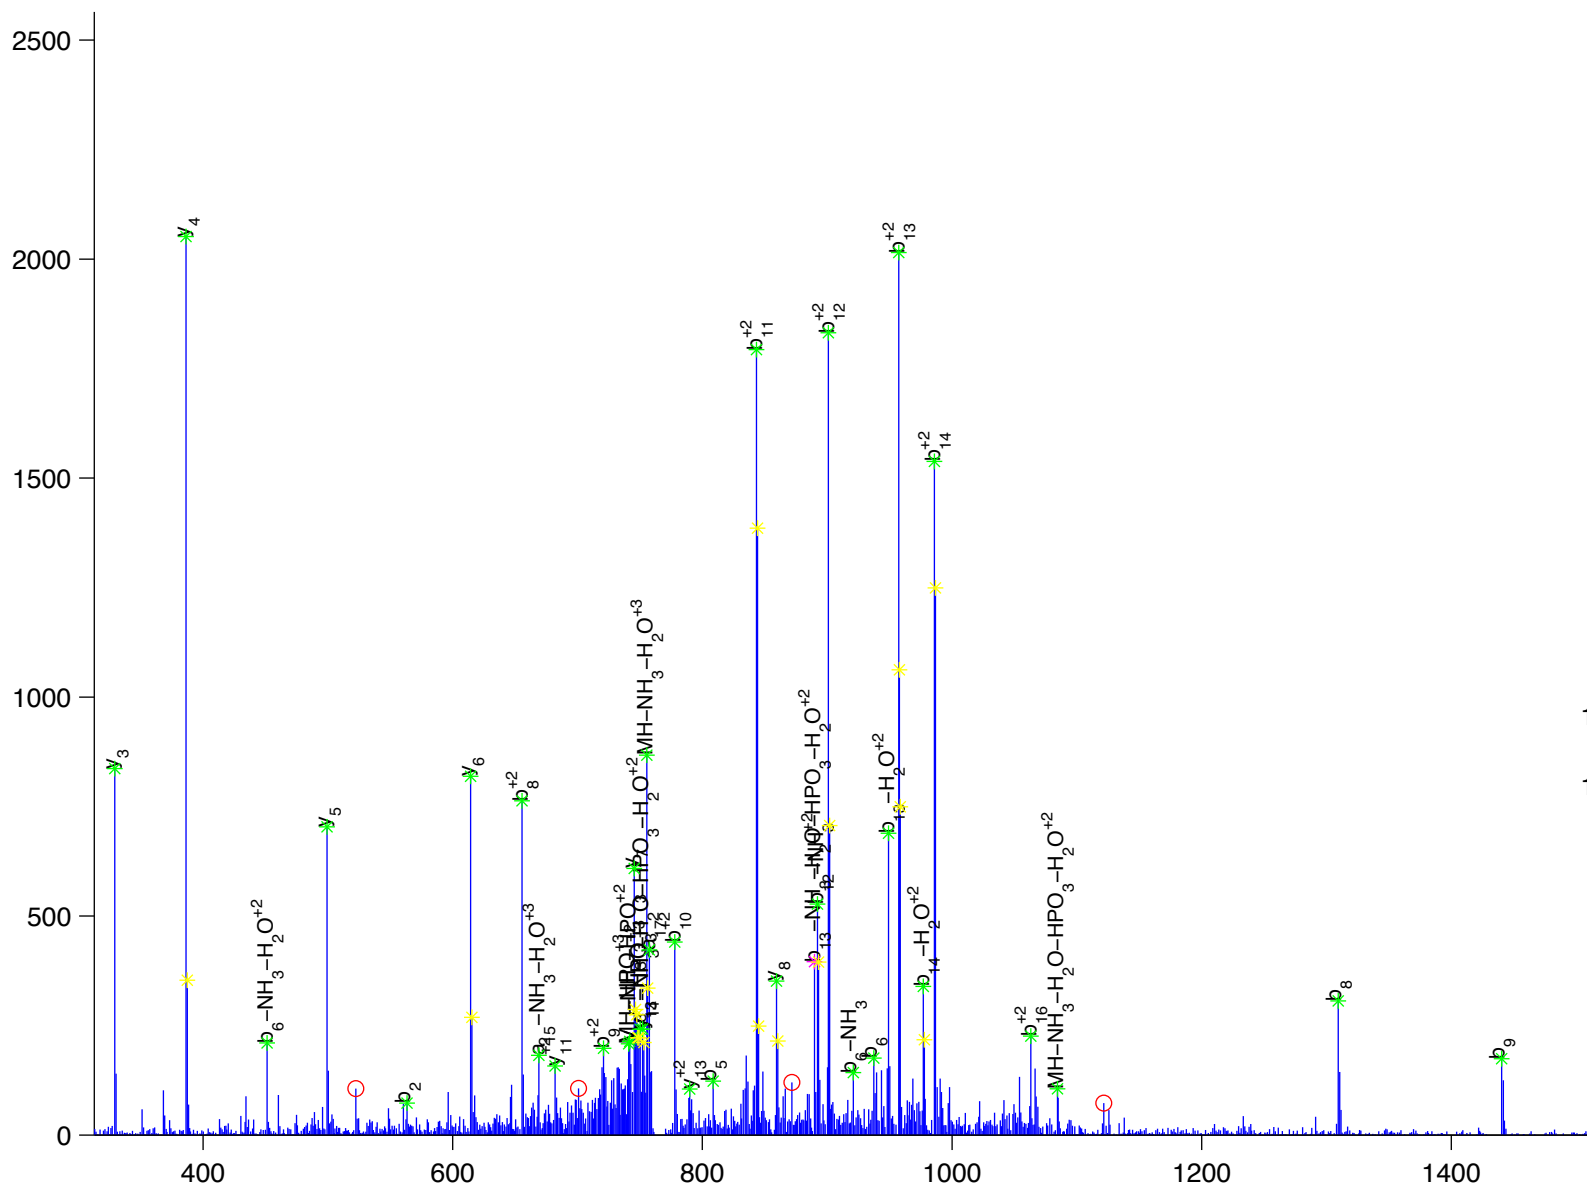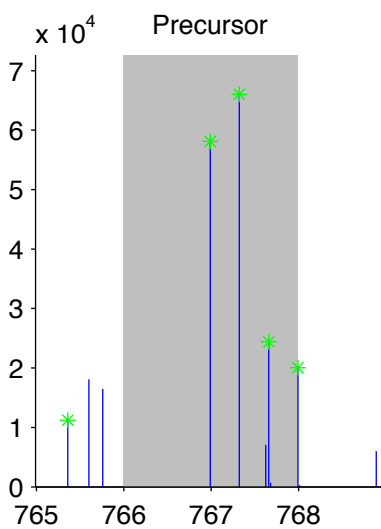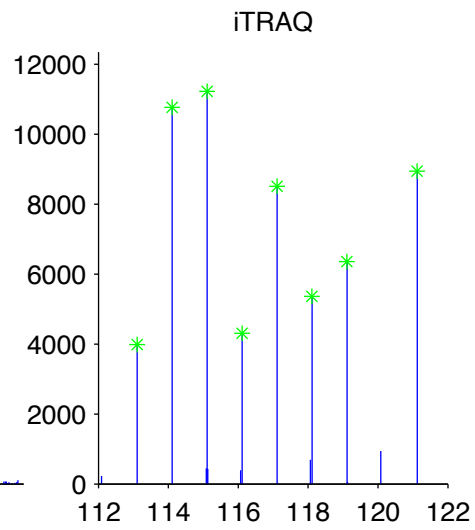

G [D] y [M] T [M] Q [I] G [C] P [R]

insulin receptor substrate 1

Charge State: +2

Scan Number: 5562

File Name: 090806ptp1blivers\_M\_NC2.raw

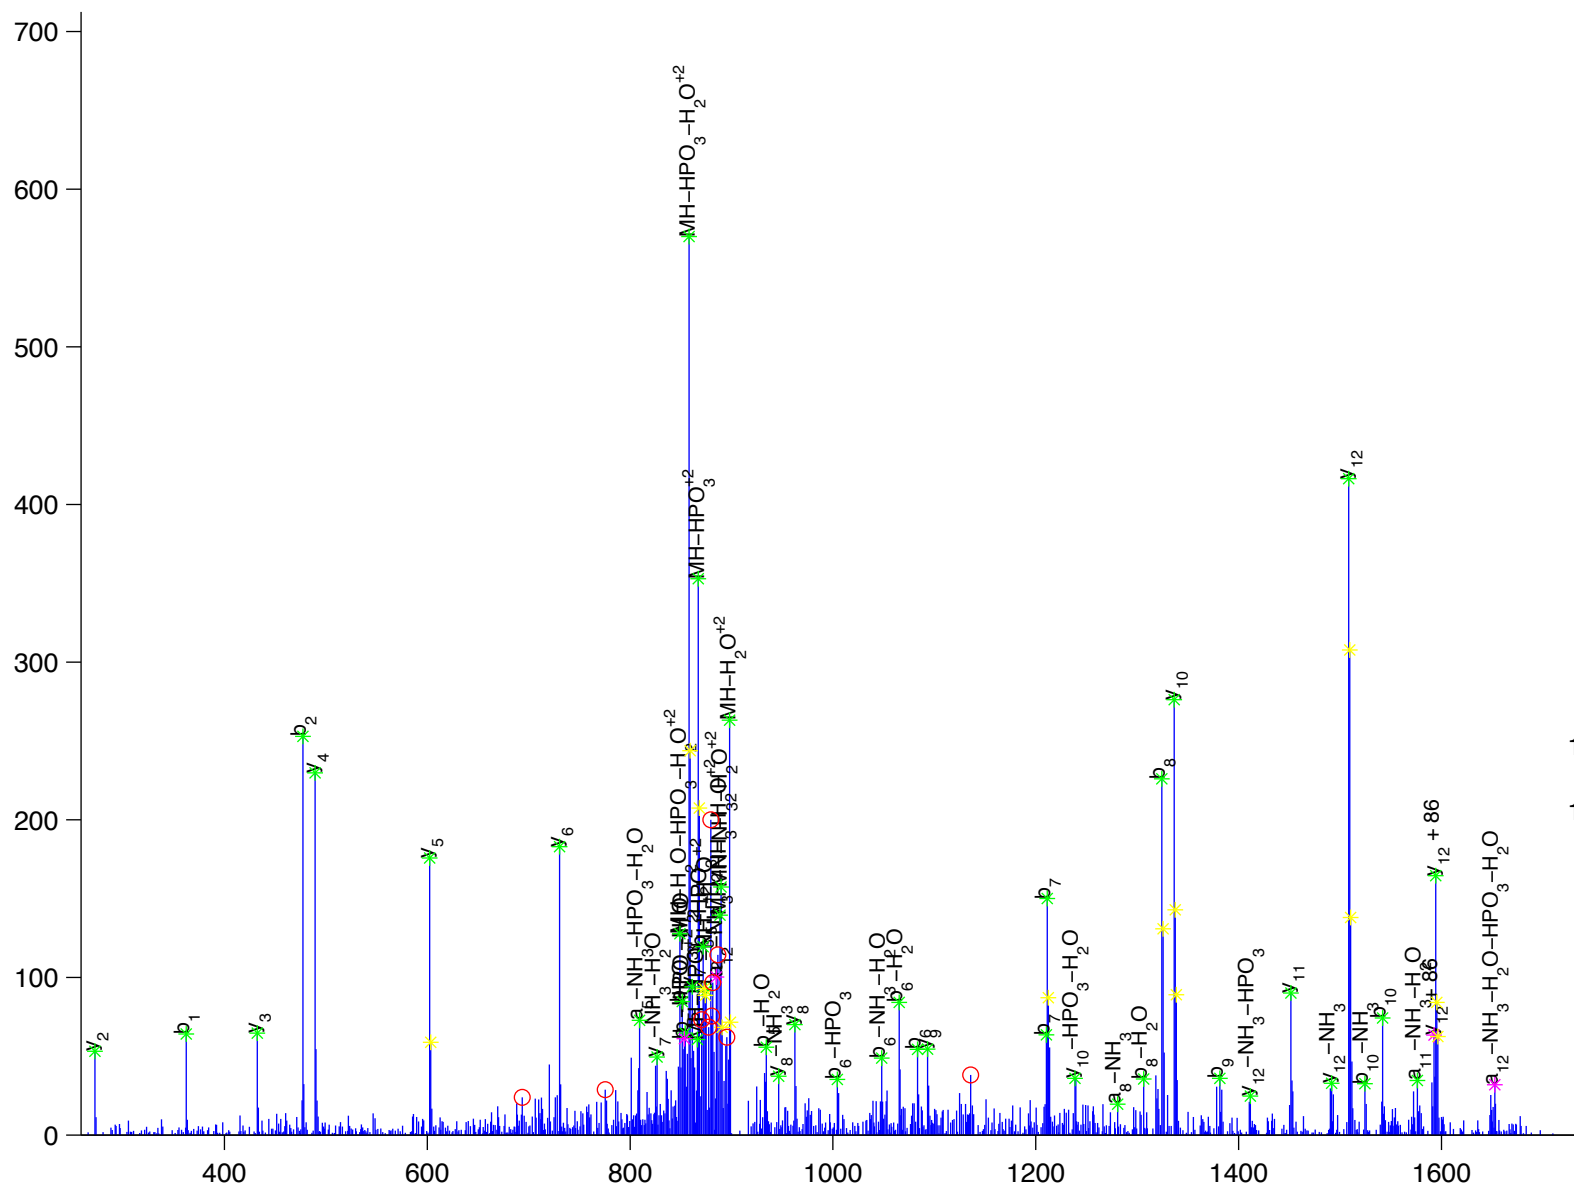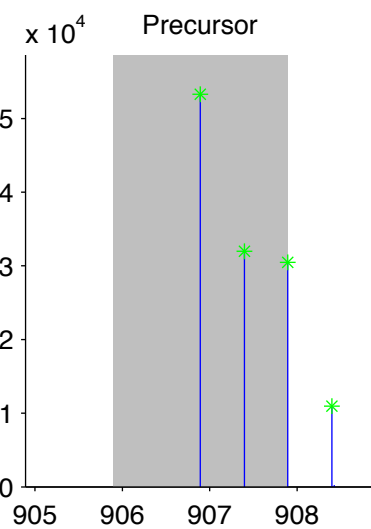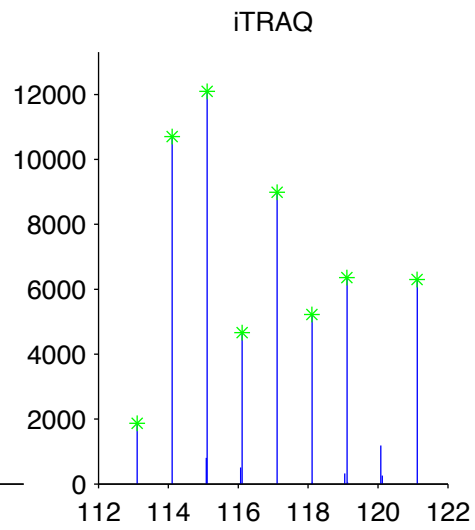

S [ D ] [ D ] y [ M ] P [ M ] S [ P ] T [ S ] V [ S ] A [ P ] K

insulin receptor substrate 2

Charge State: +3

Scan Number: 5157

File Name: 090806ptp1blivers\_M\_NC2.raw

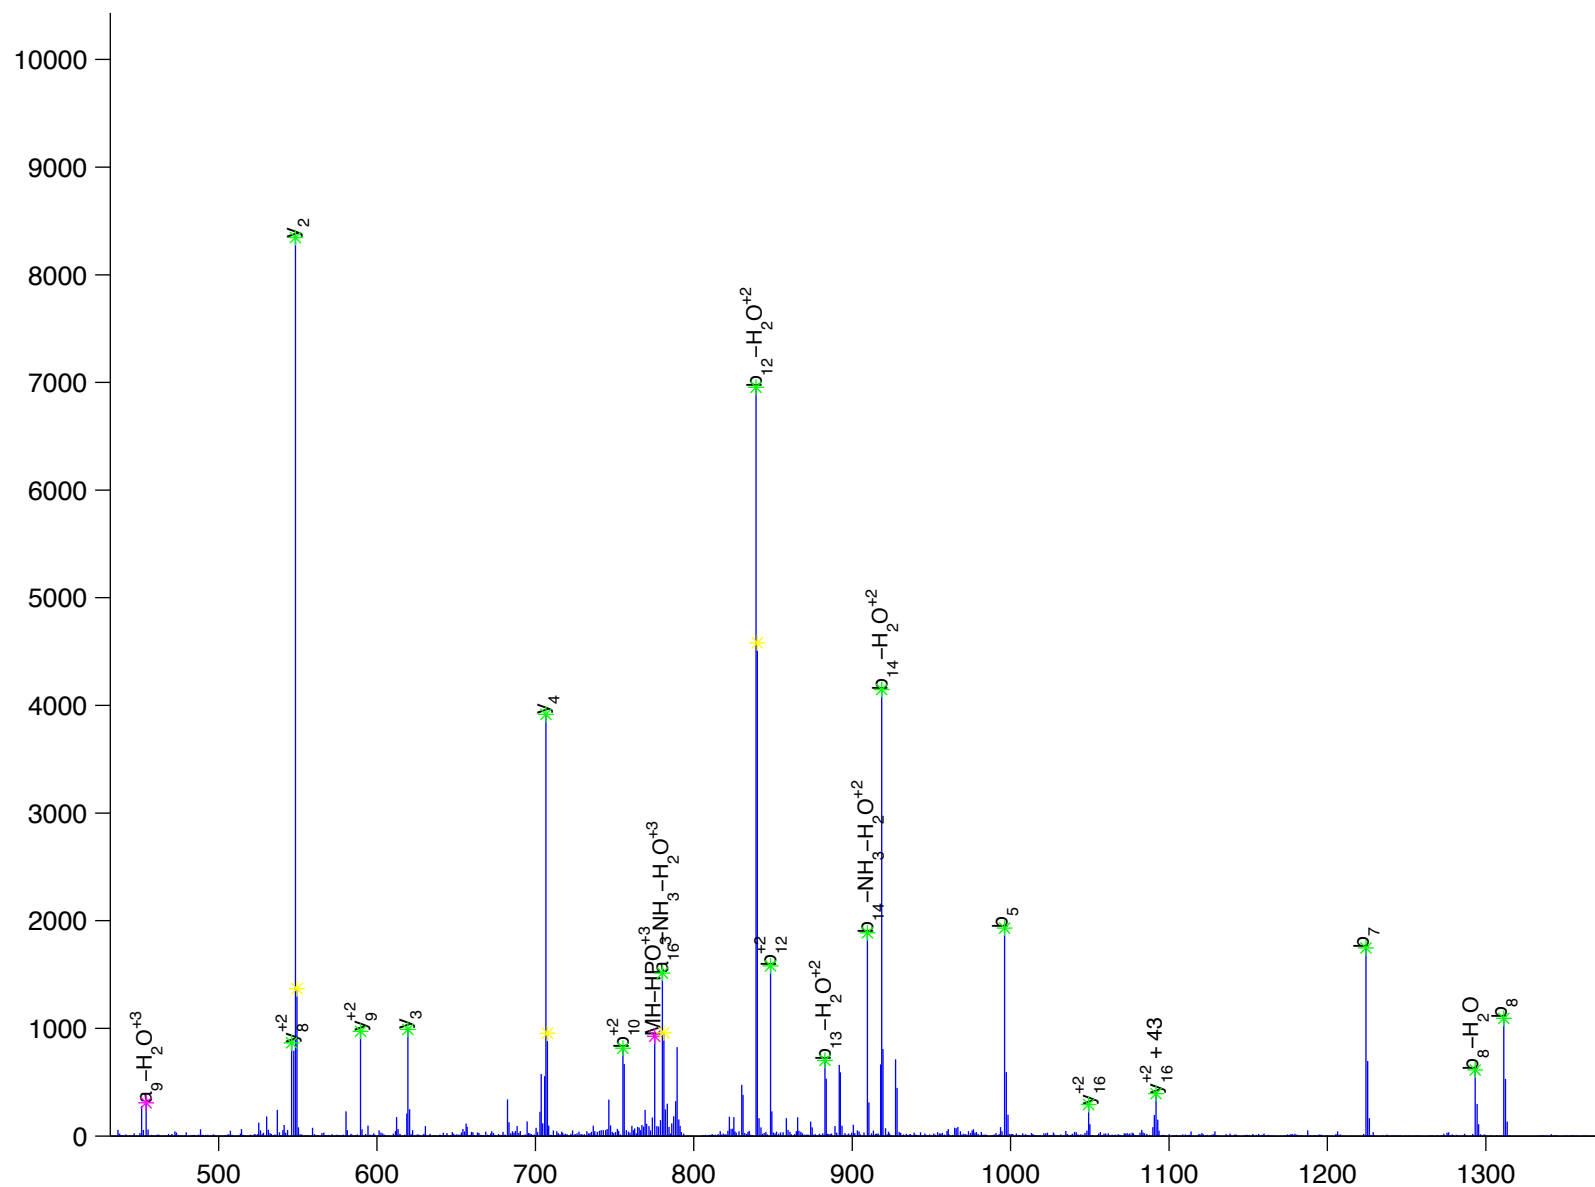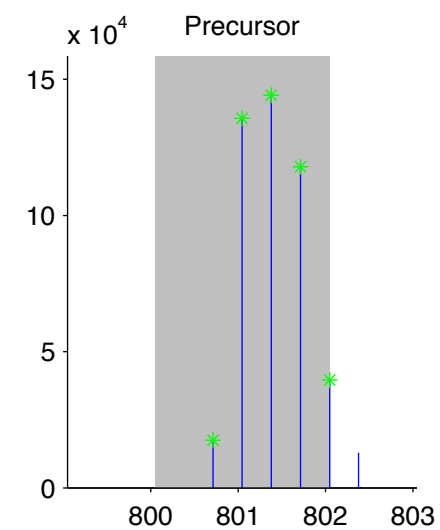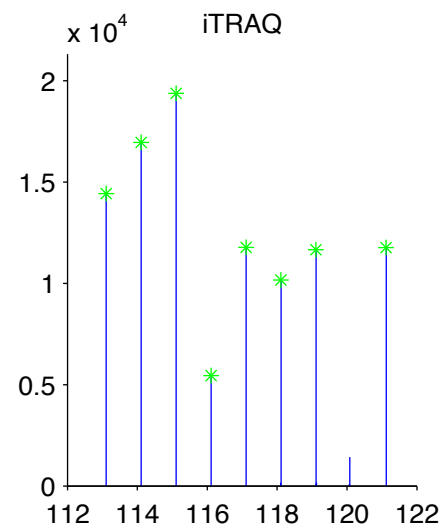

A [ P ] [ C ] [ S ] [ C ] [ S ] [ G ] [ D ] [ N ] [ D ] [ Q ] [ y ] [ V ] [ L ] [ M ] [ S ] [ S ] [ P ] [ V ] [ G ] [ R ]

insulin receptor substrate 2

Charge State: +3

Scan Number: 5779

File Name: 091130ptp1blivers\_hfd\_basal2.raw

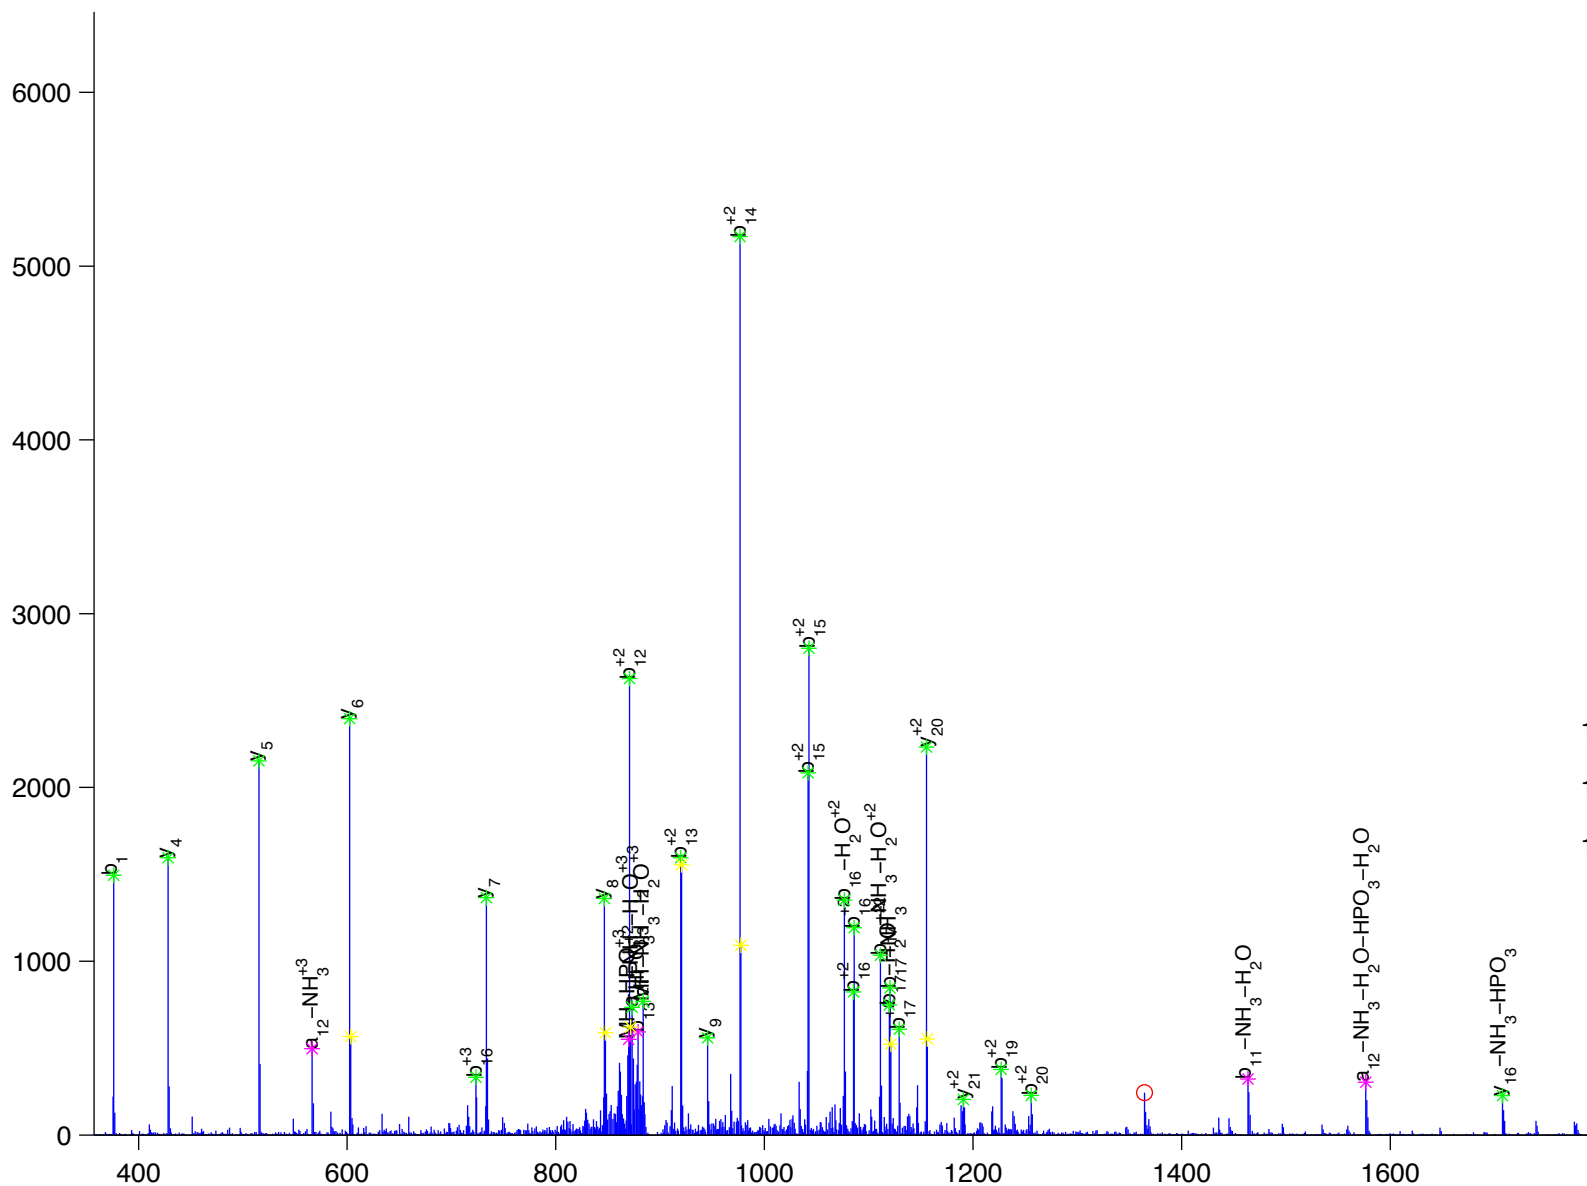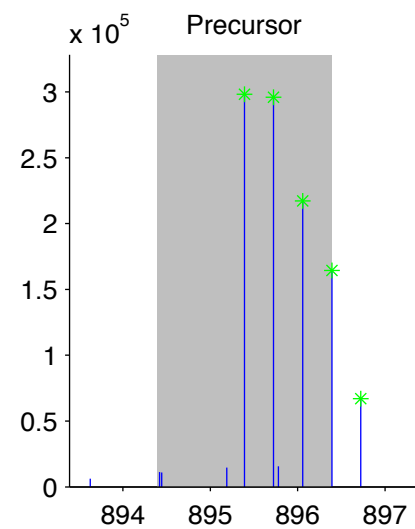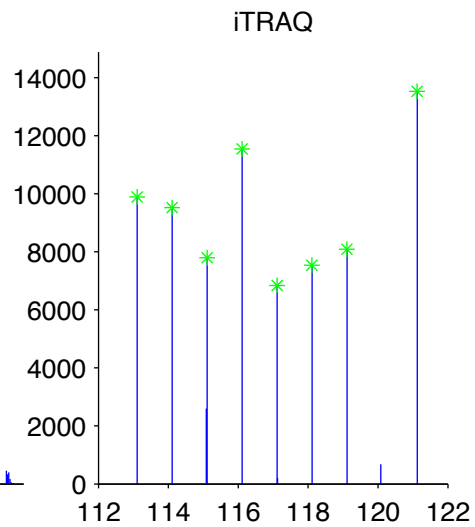

S [ S ] S [ S ] N [ L ] G [ A ] D [ D ] G [ y ] M [ P ] M [ T ] P [ G ] A [ A ] L [ R ]

insulin receptor substrate 2

Charge State: +3

Scan Number: 6281

File Name: 091130ptp1blivers\_hfd\_basal2.raw

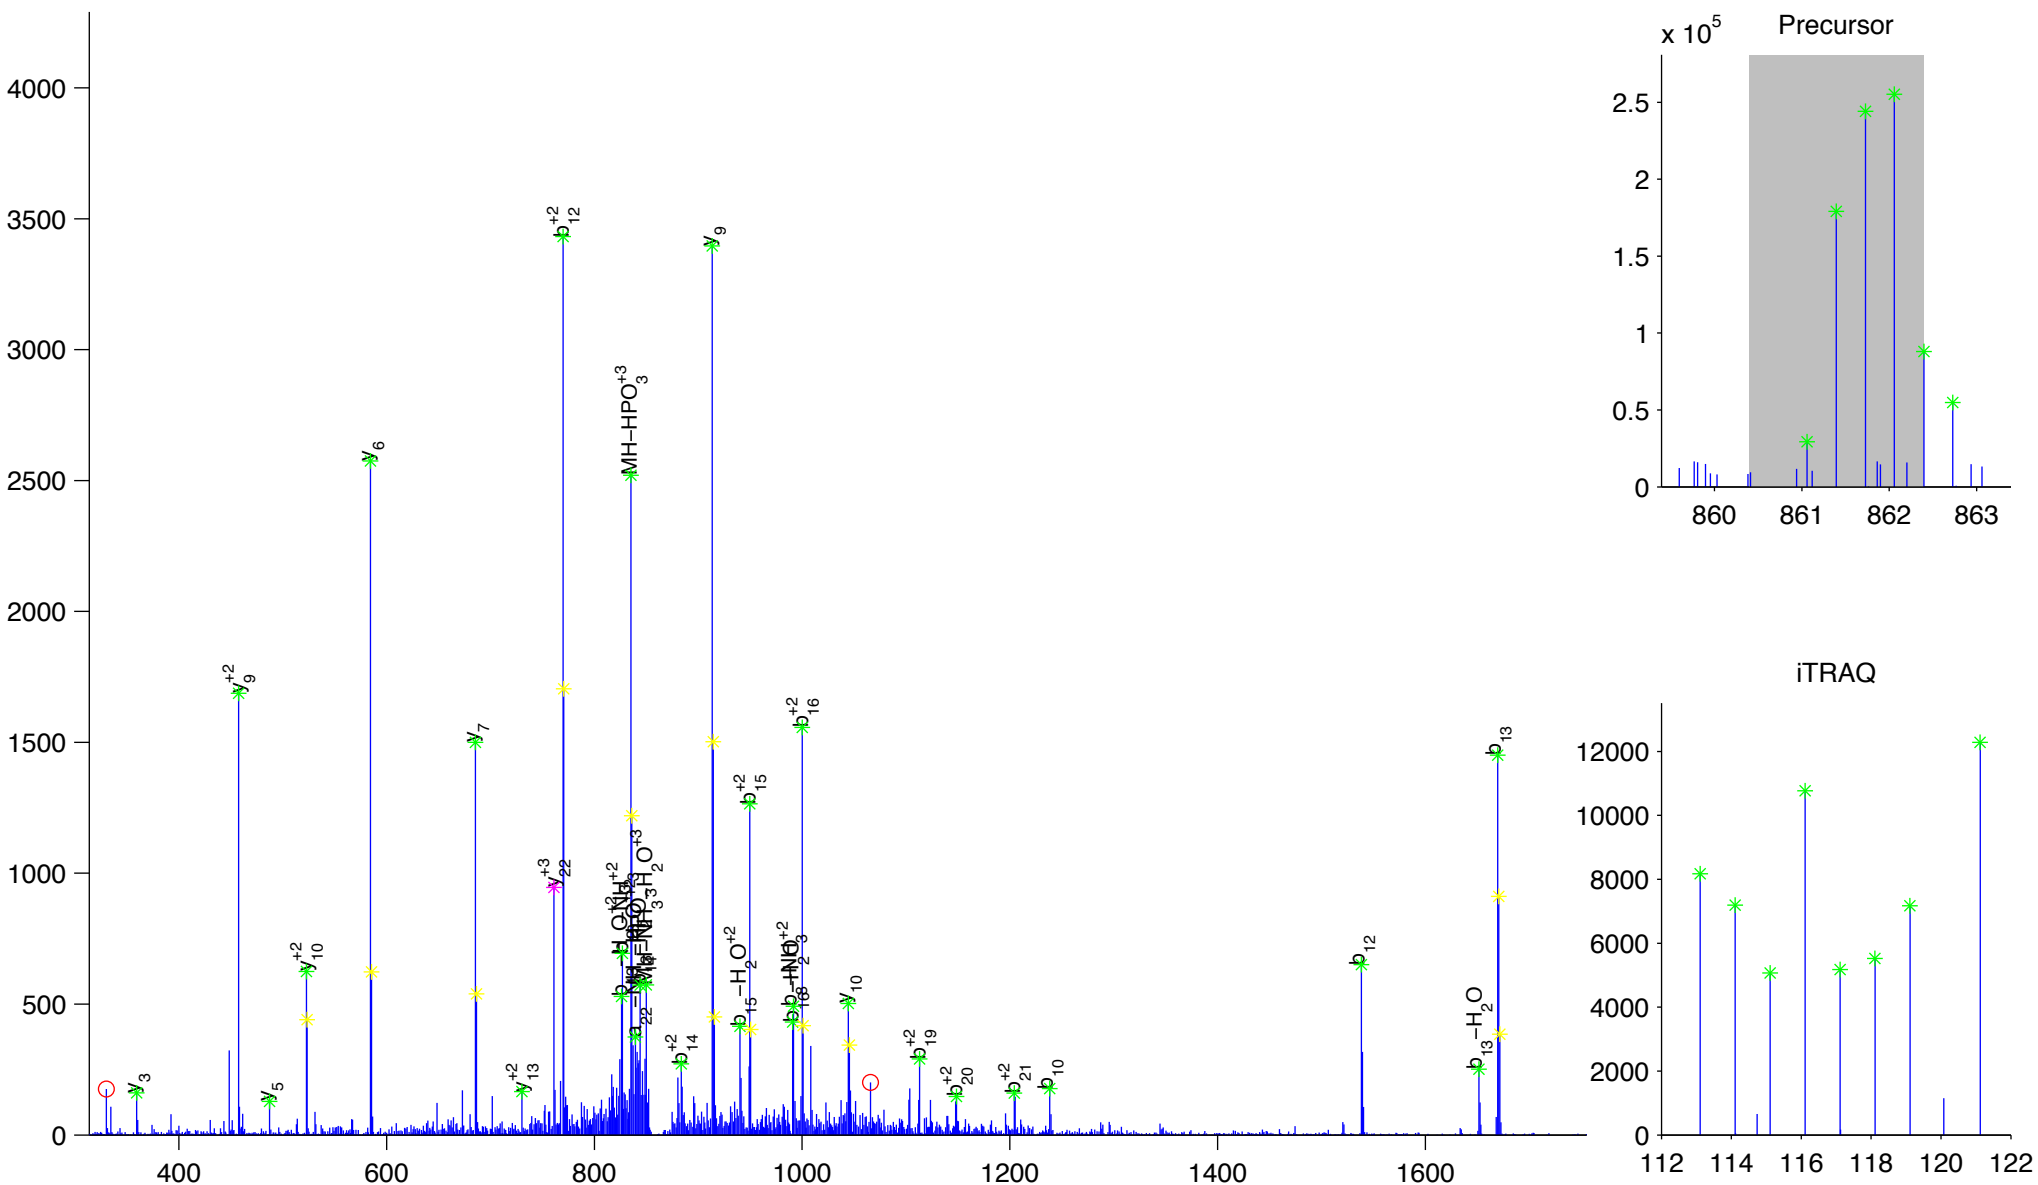

I L G I P V I I T E Q y P K

isochorismatase domain containing 1

Charge State: +3

Scan Number: 9032

File Name: 091130ptp1blivers\_hfd\_basal2.raw

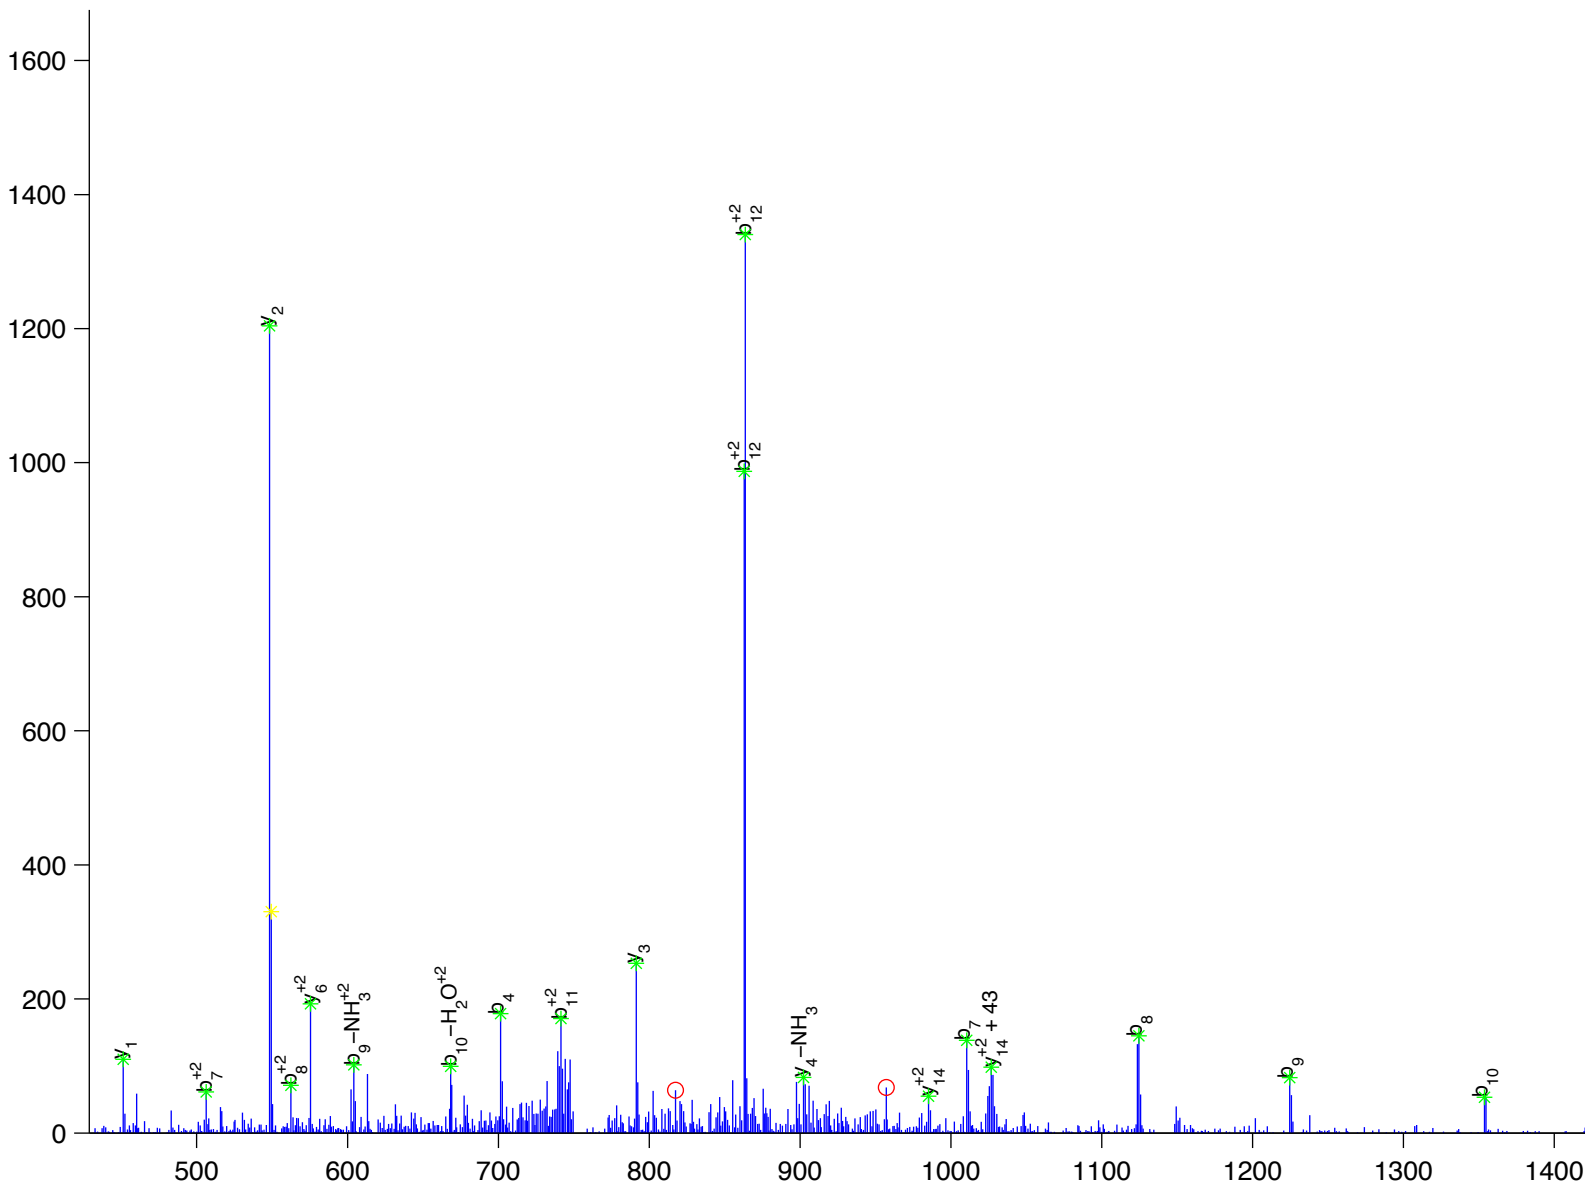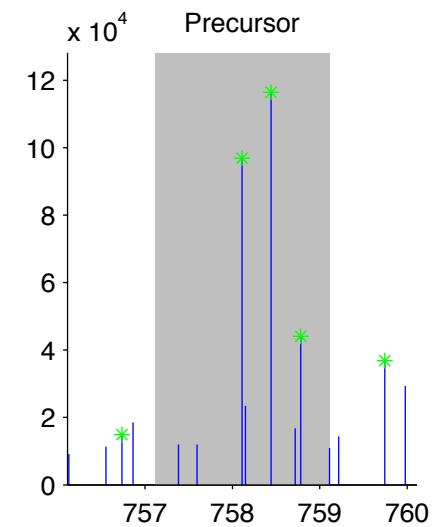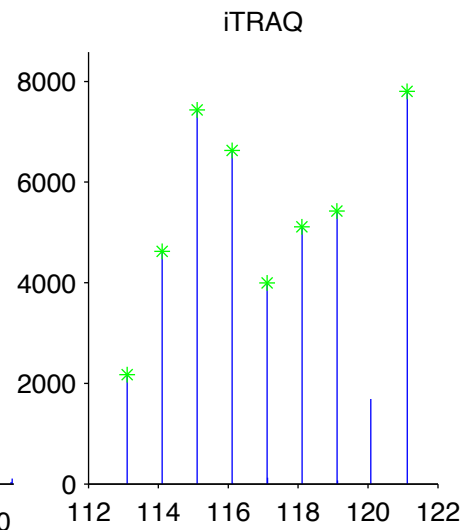

S [D] y [L] N [T] F [E] F [M] D [K]

isocitrate dehydrogenase 1 (NADP+), soluble

Charge State: +3

Scan Number: 5460

File Name: 100827ptp1blivers\_ncHFD\_basal.raw

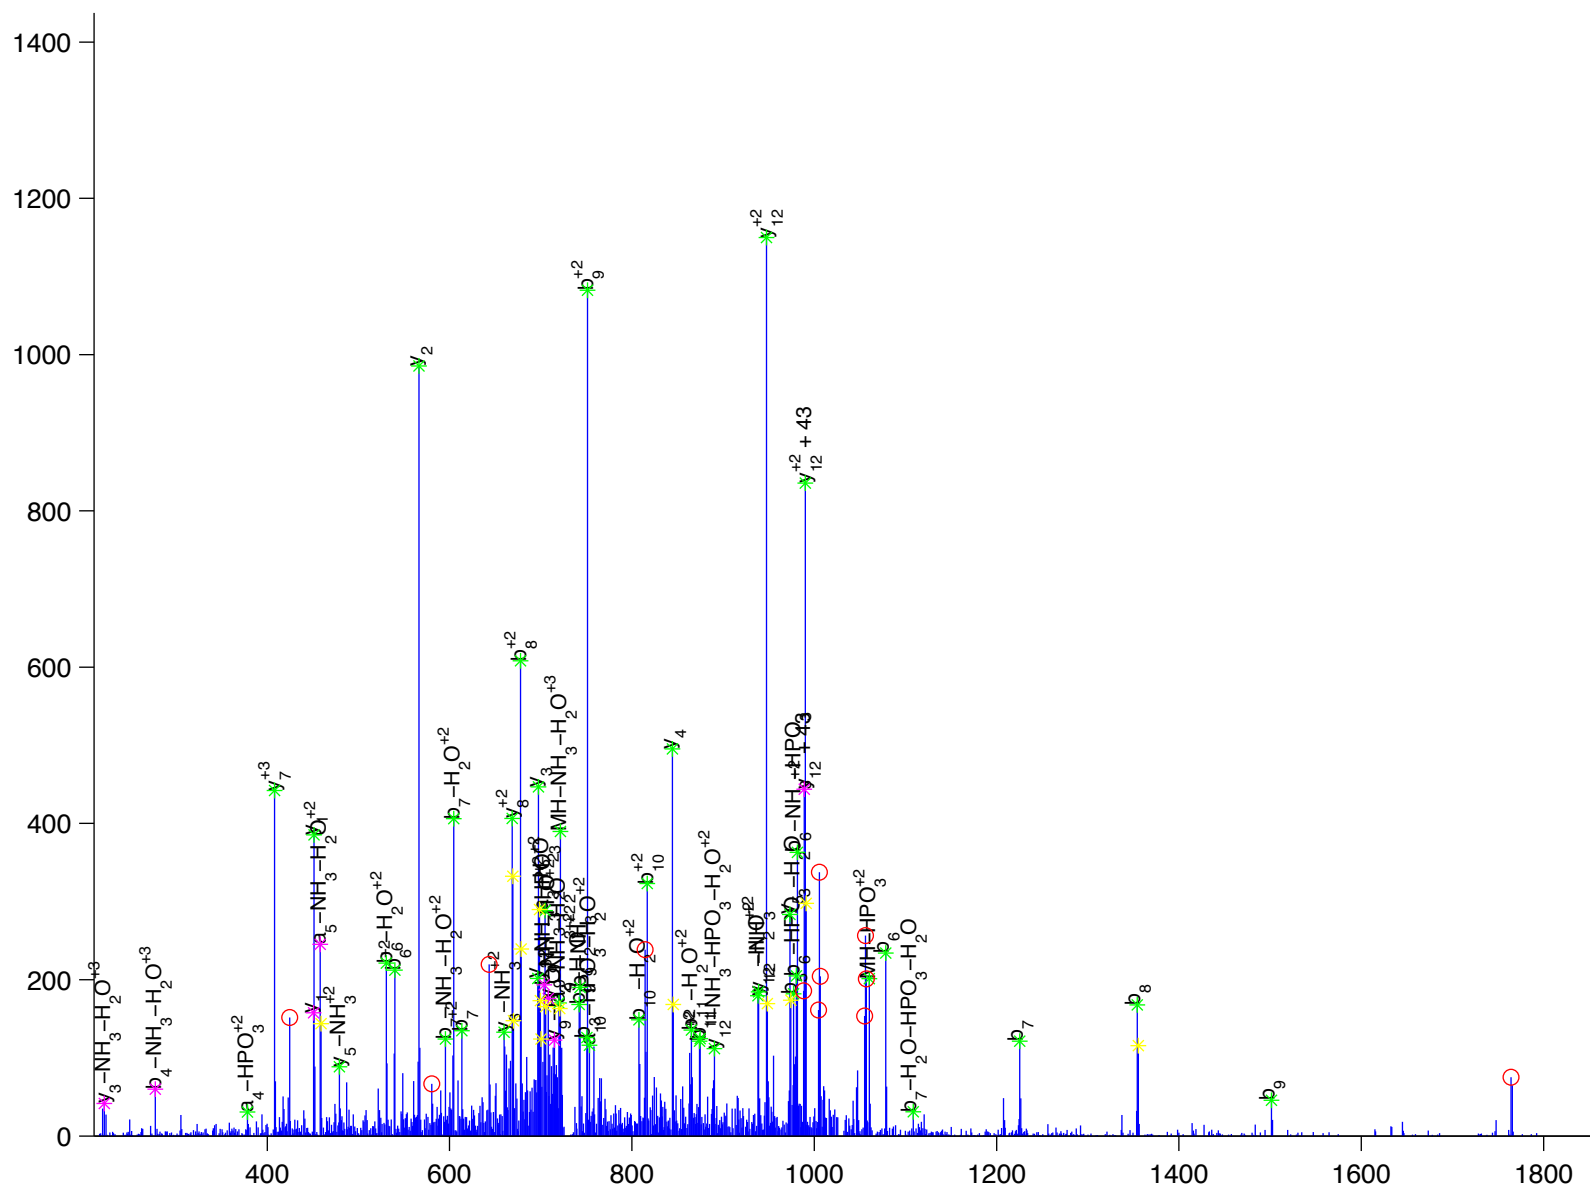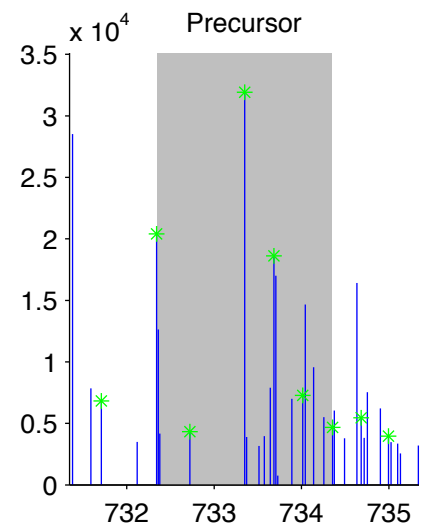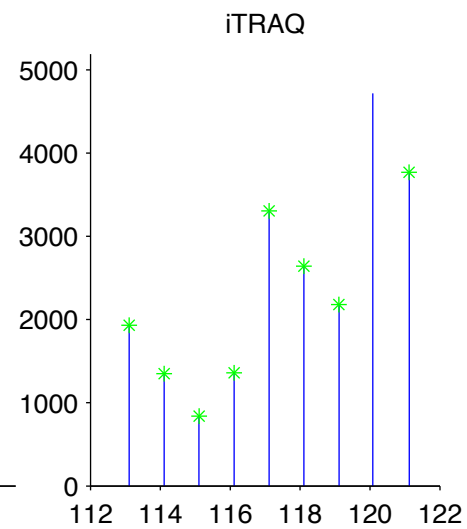



R[E]V[G]D[y]G[Q]L[H]K

Janus kinase 2

Charge State: +4

Scan Number: 3914

File Name: 091130ptp1blivers\_hfd\_basal2.raw

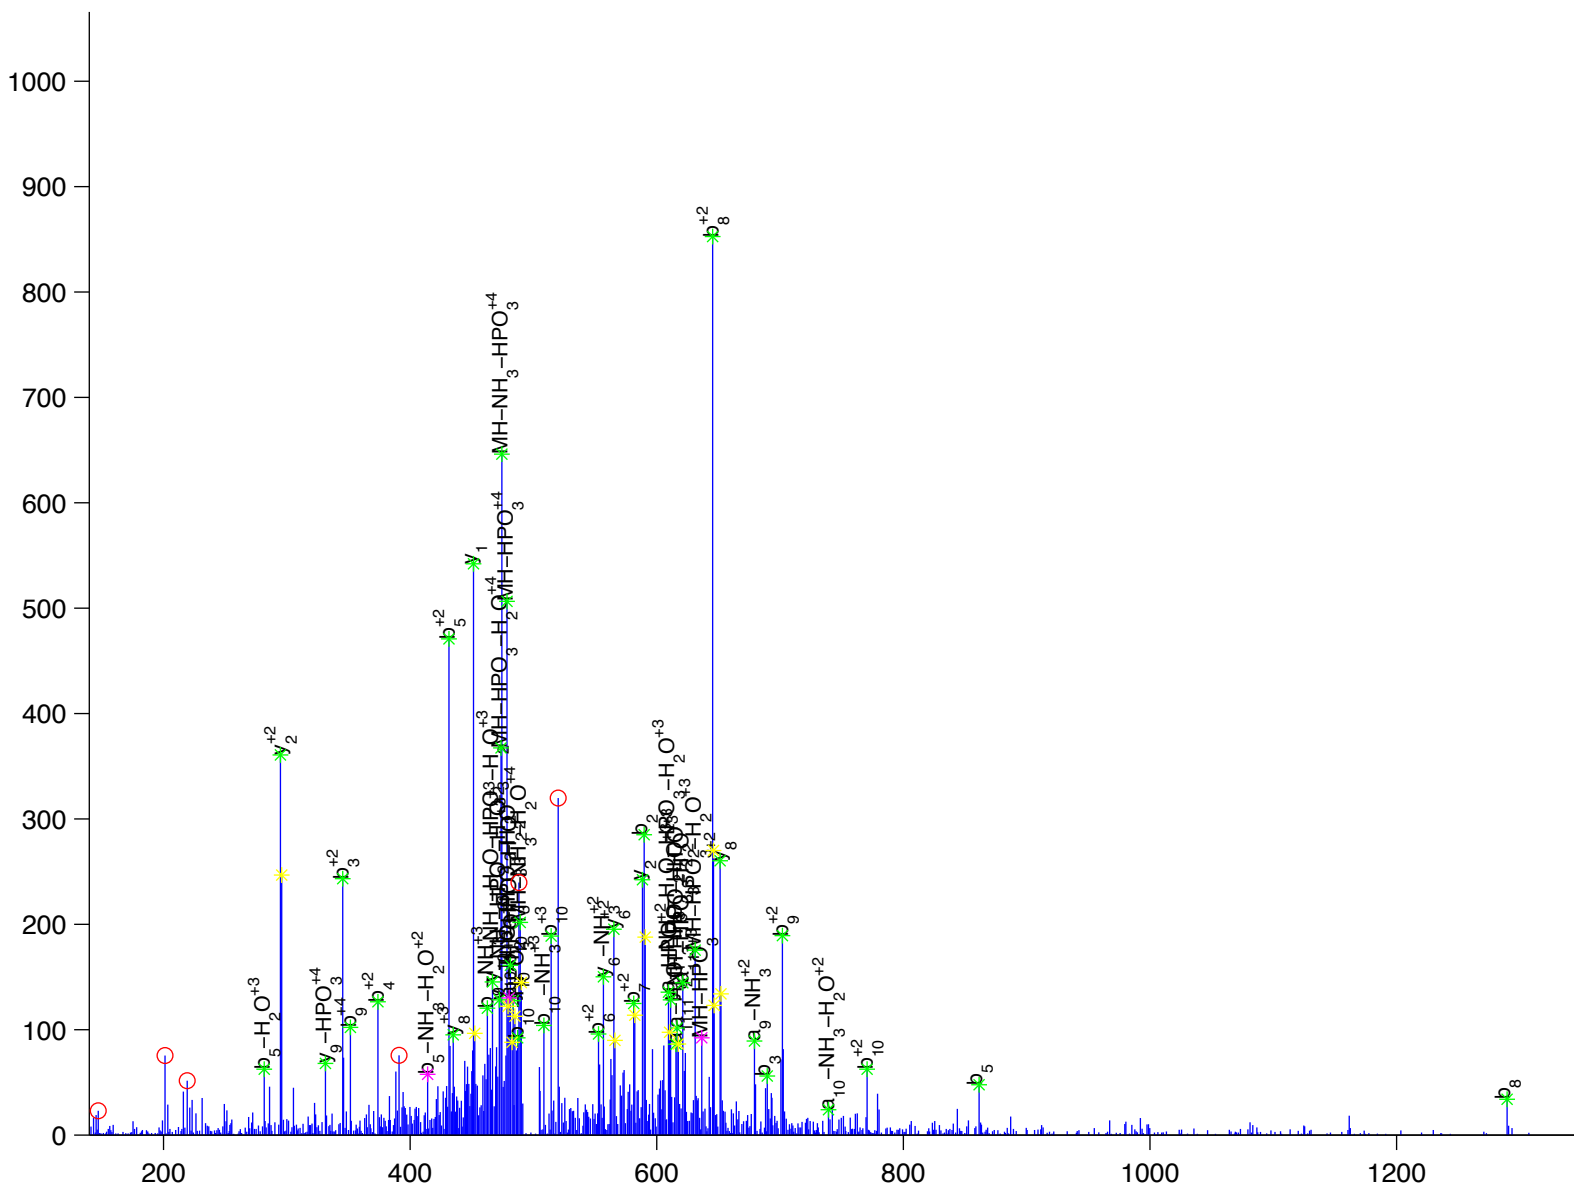

S [ T ] [ T ] [ F ] [ S ] [ T ] [ N ] [ y ] R

keratin 18

Charge State: +2

Scan Number: 4139

File Name: 091130ptp1blivers\_hfd\_basal2.raw

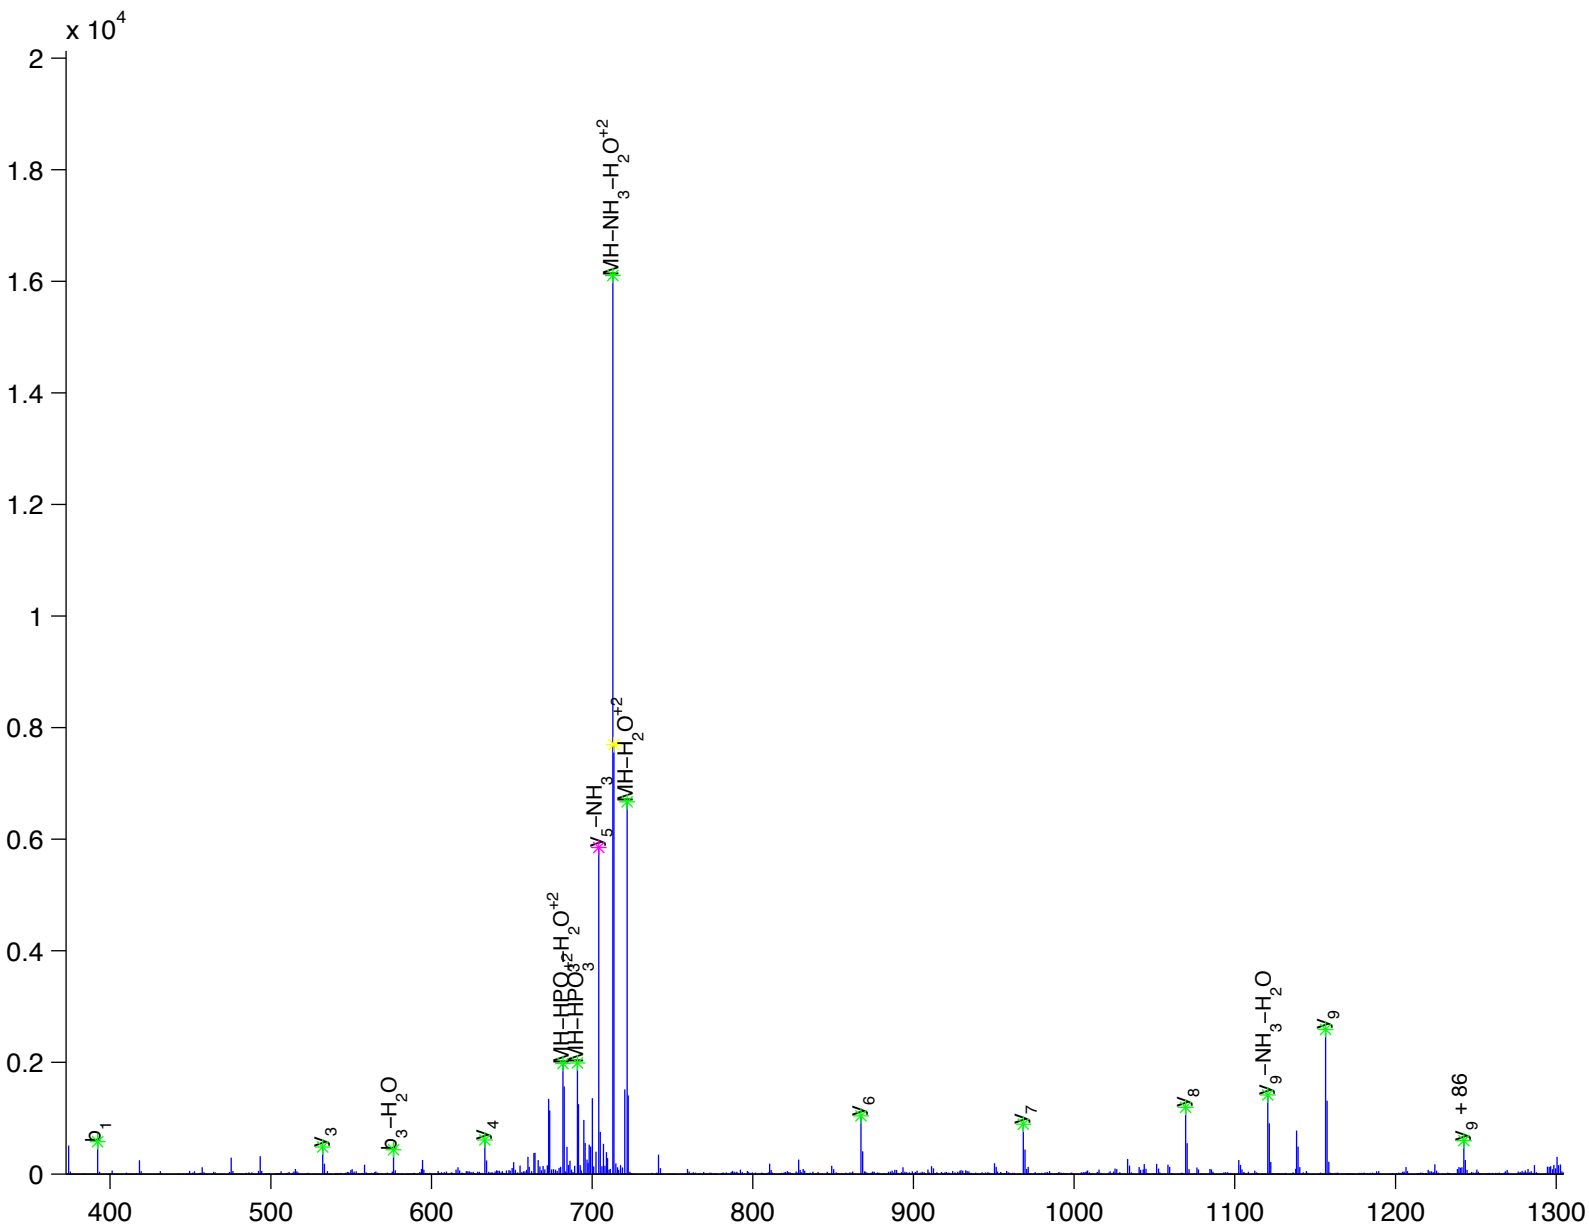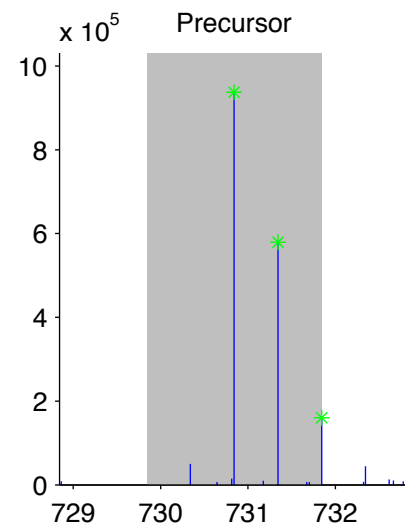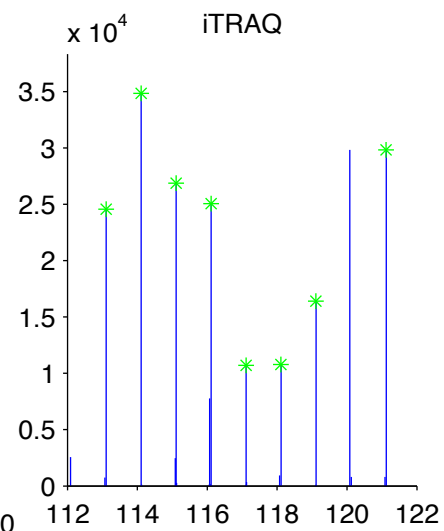

D[V]D[C]A]y[L]R

keratin complex 2, basic gene 18

Charge State: +2

Scan Number: 4005

File Name: 090806ptp1blivers\_M\_NC2.raw

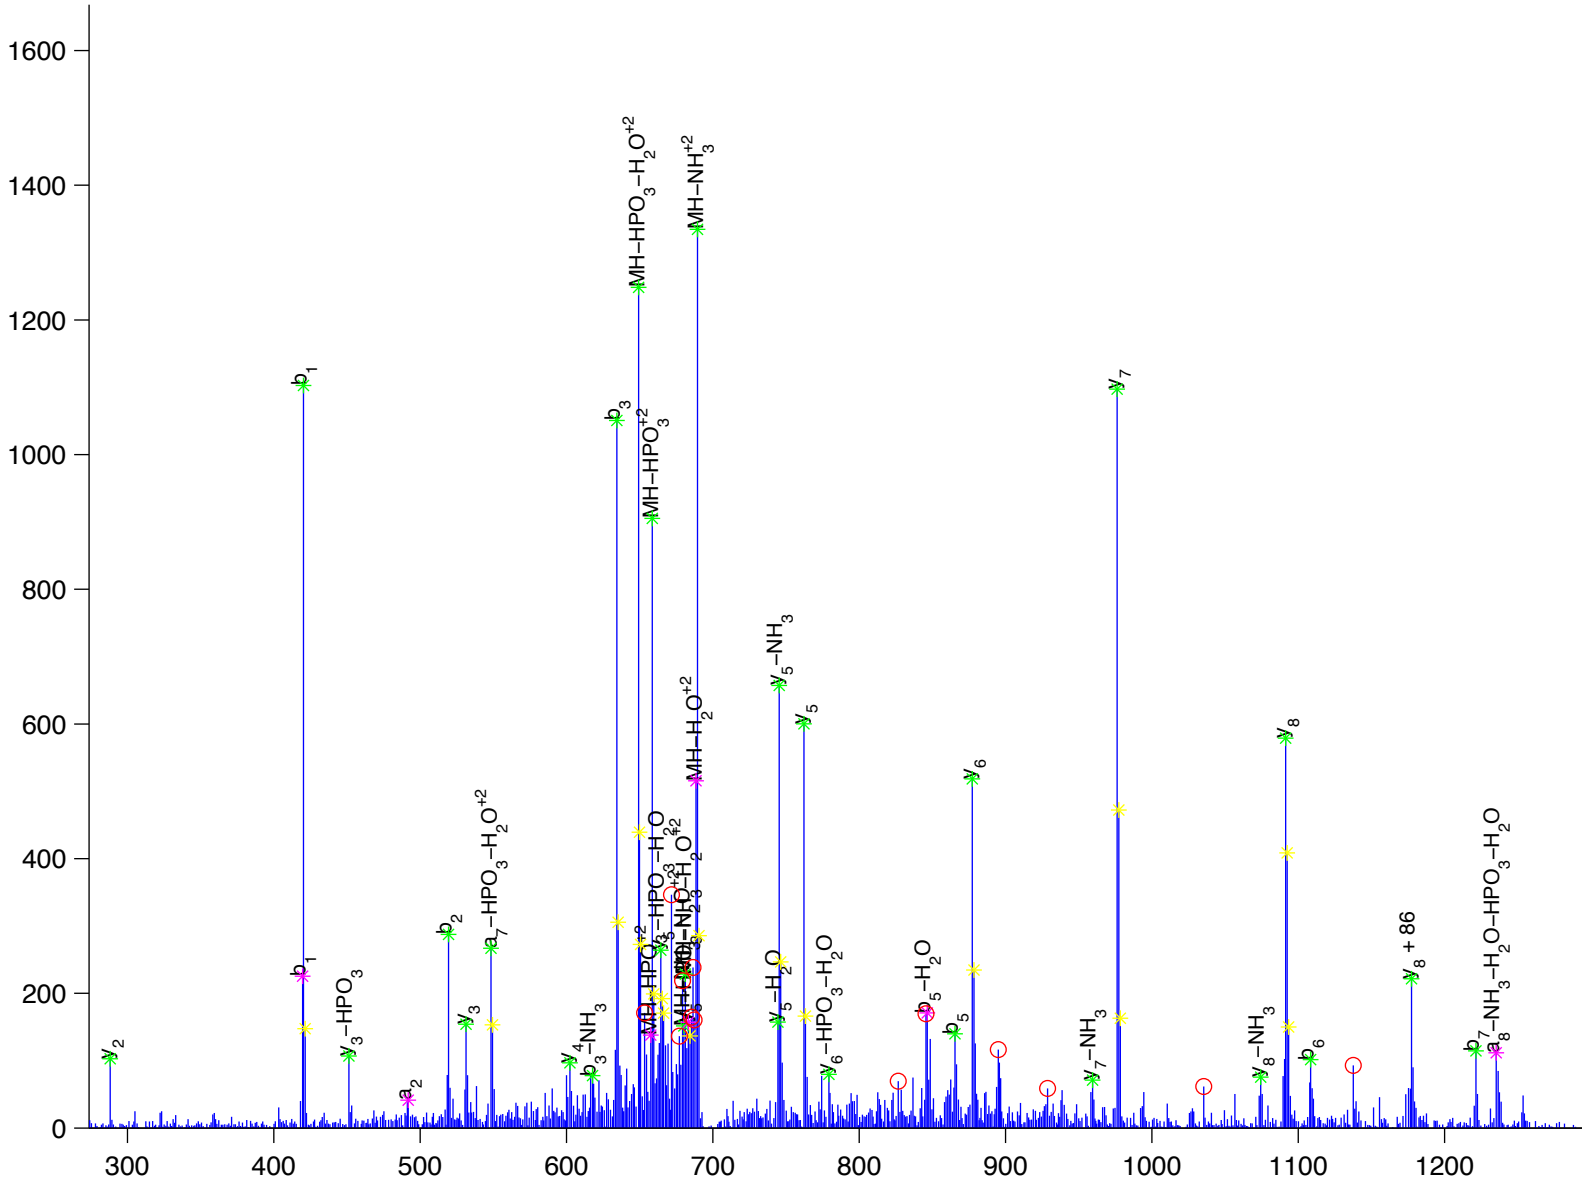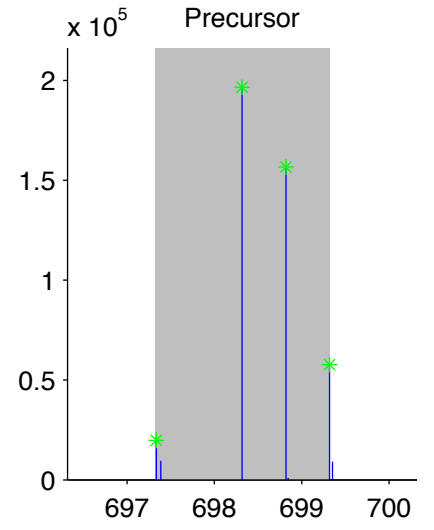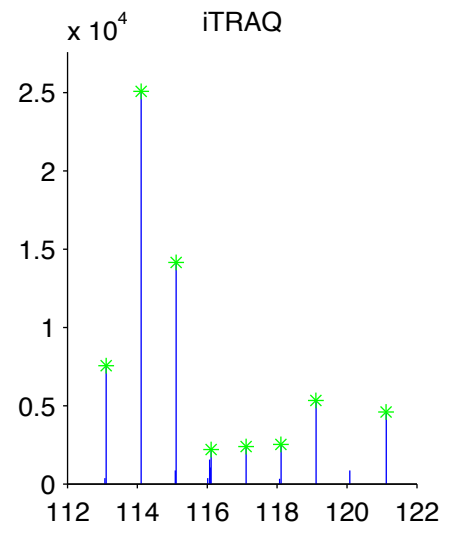

D[V]D[E]A[y]M[N]K[V]E[L]E[S]R

keratin complex 2, basic, gene 8

Charge State: +

Scan Number: 4188

File Name: 100905ptp1blivers\_ncHFD\_basal.raw

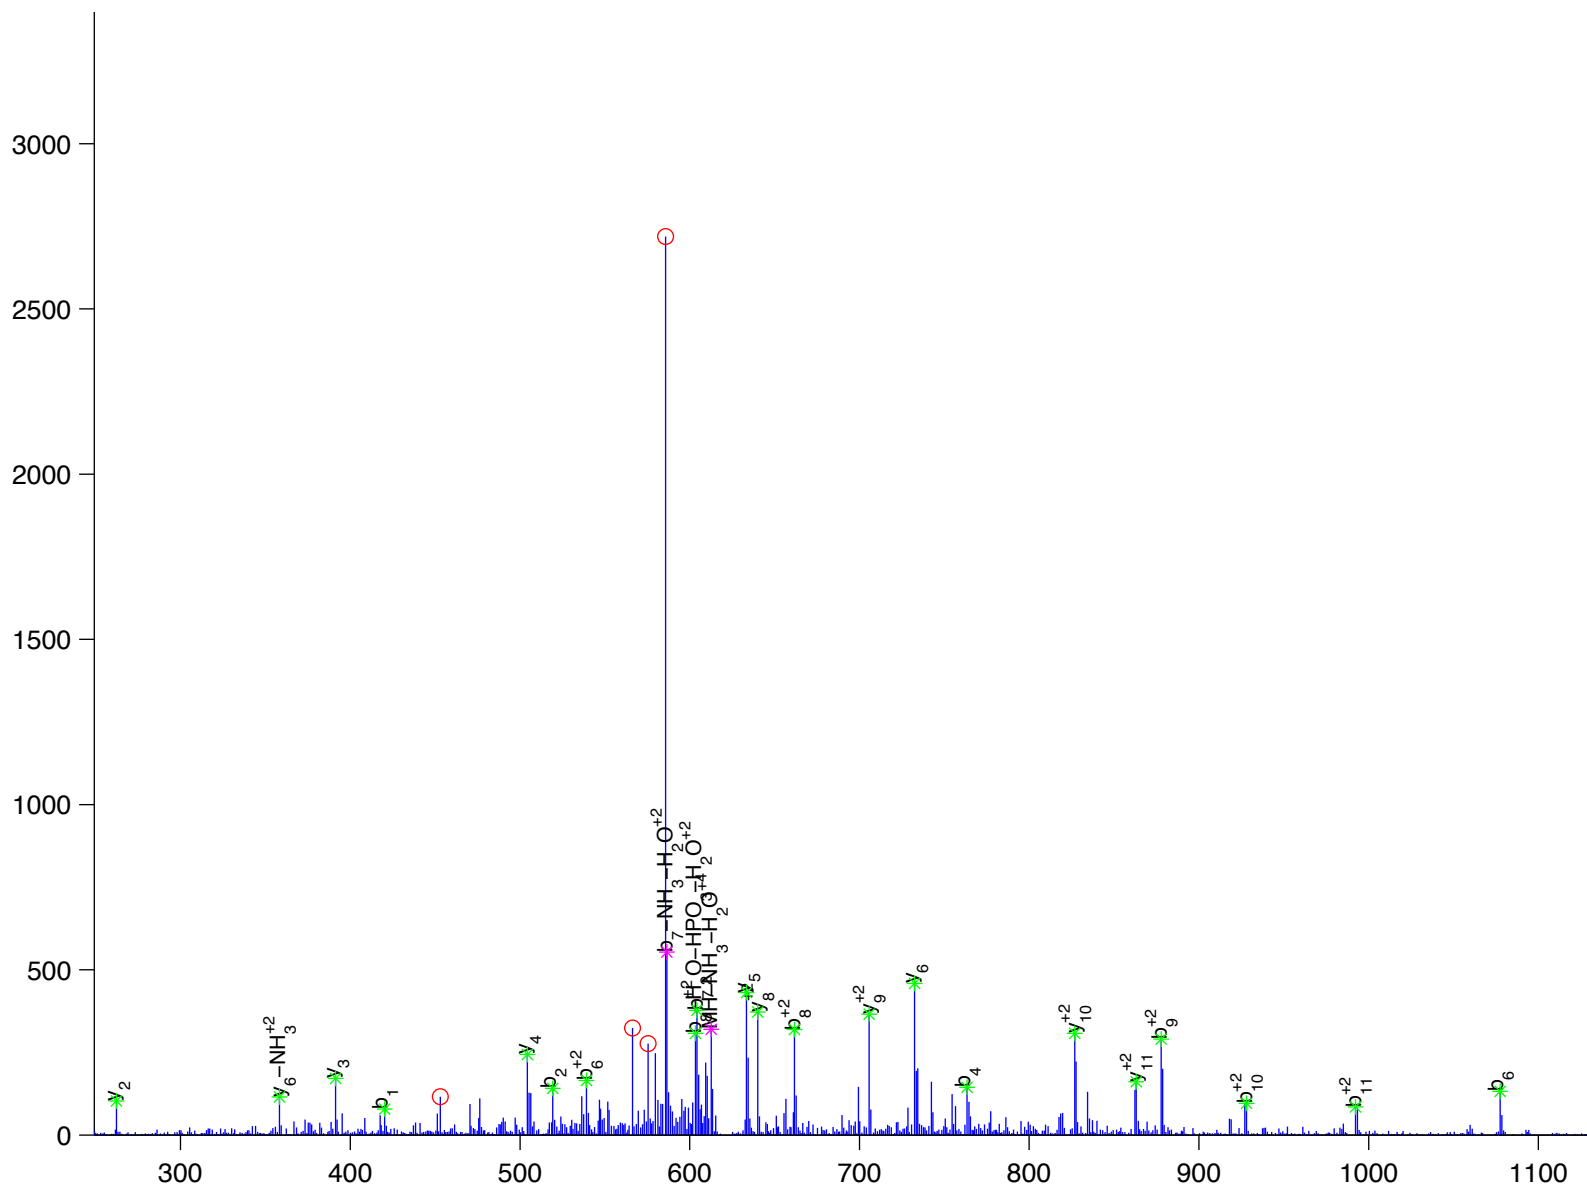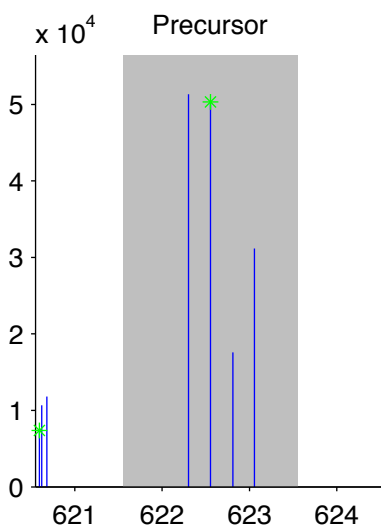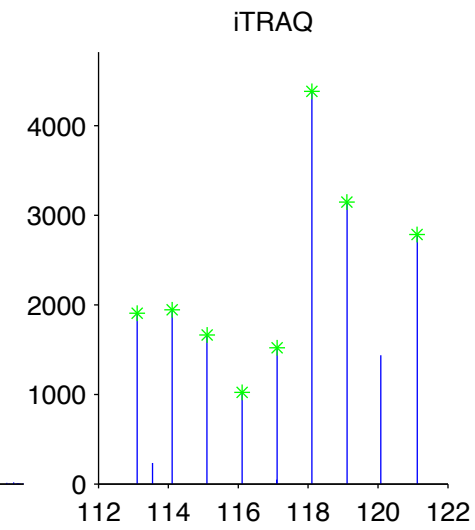

E [ G ] E [ y ] V [ V ] V [ G ] T [ N ] K

kinesin family member 13B

Charge State: +3

Scan Number: 4596

File Name: 091130ptp1blivers\_hfd\_basal2.raw

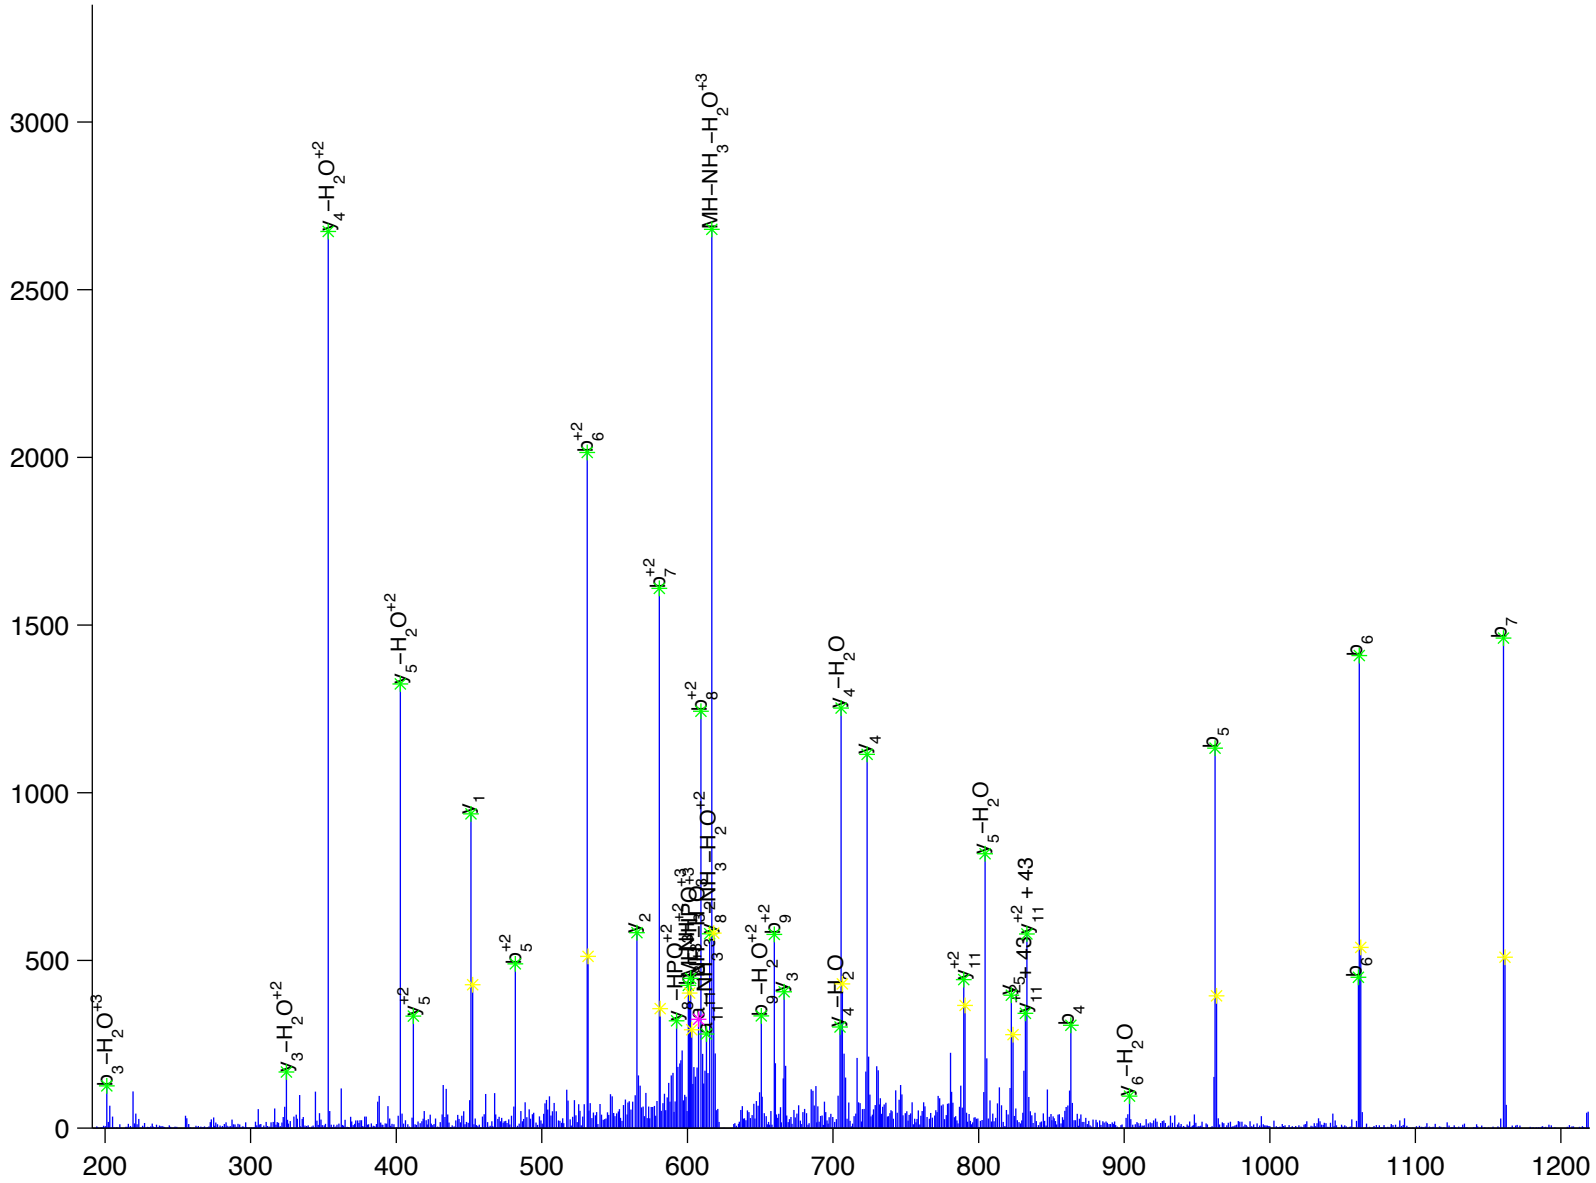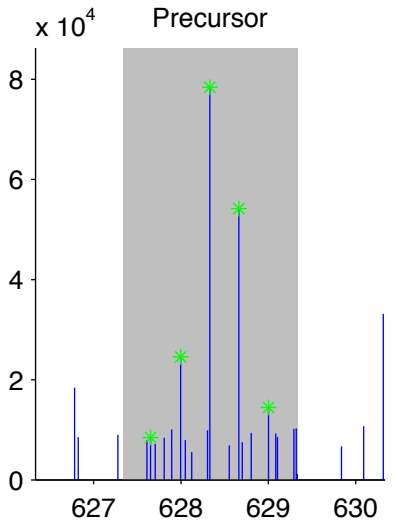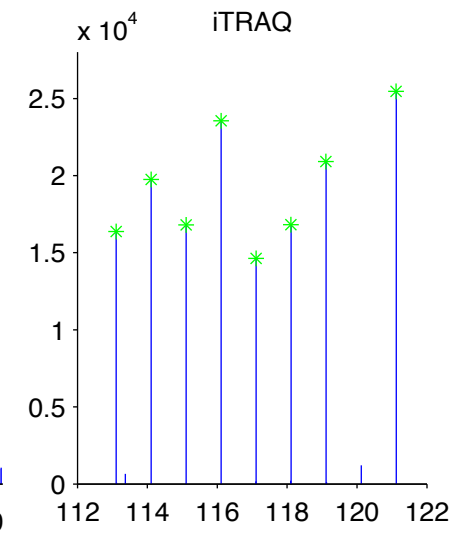

Q[V]V[D]S[A]y[E]V[I]K

lactate dehydrogenase A

Charge State: +3

Scan Number: 7447

File Name: 090807ptp1blivers\_M\_HFD\_basal.raw

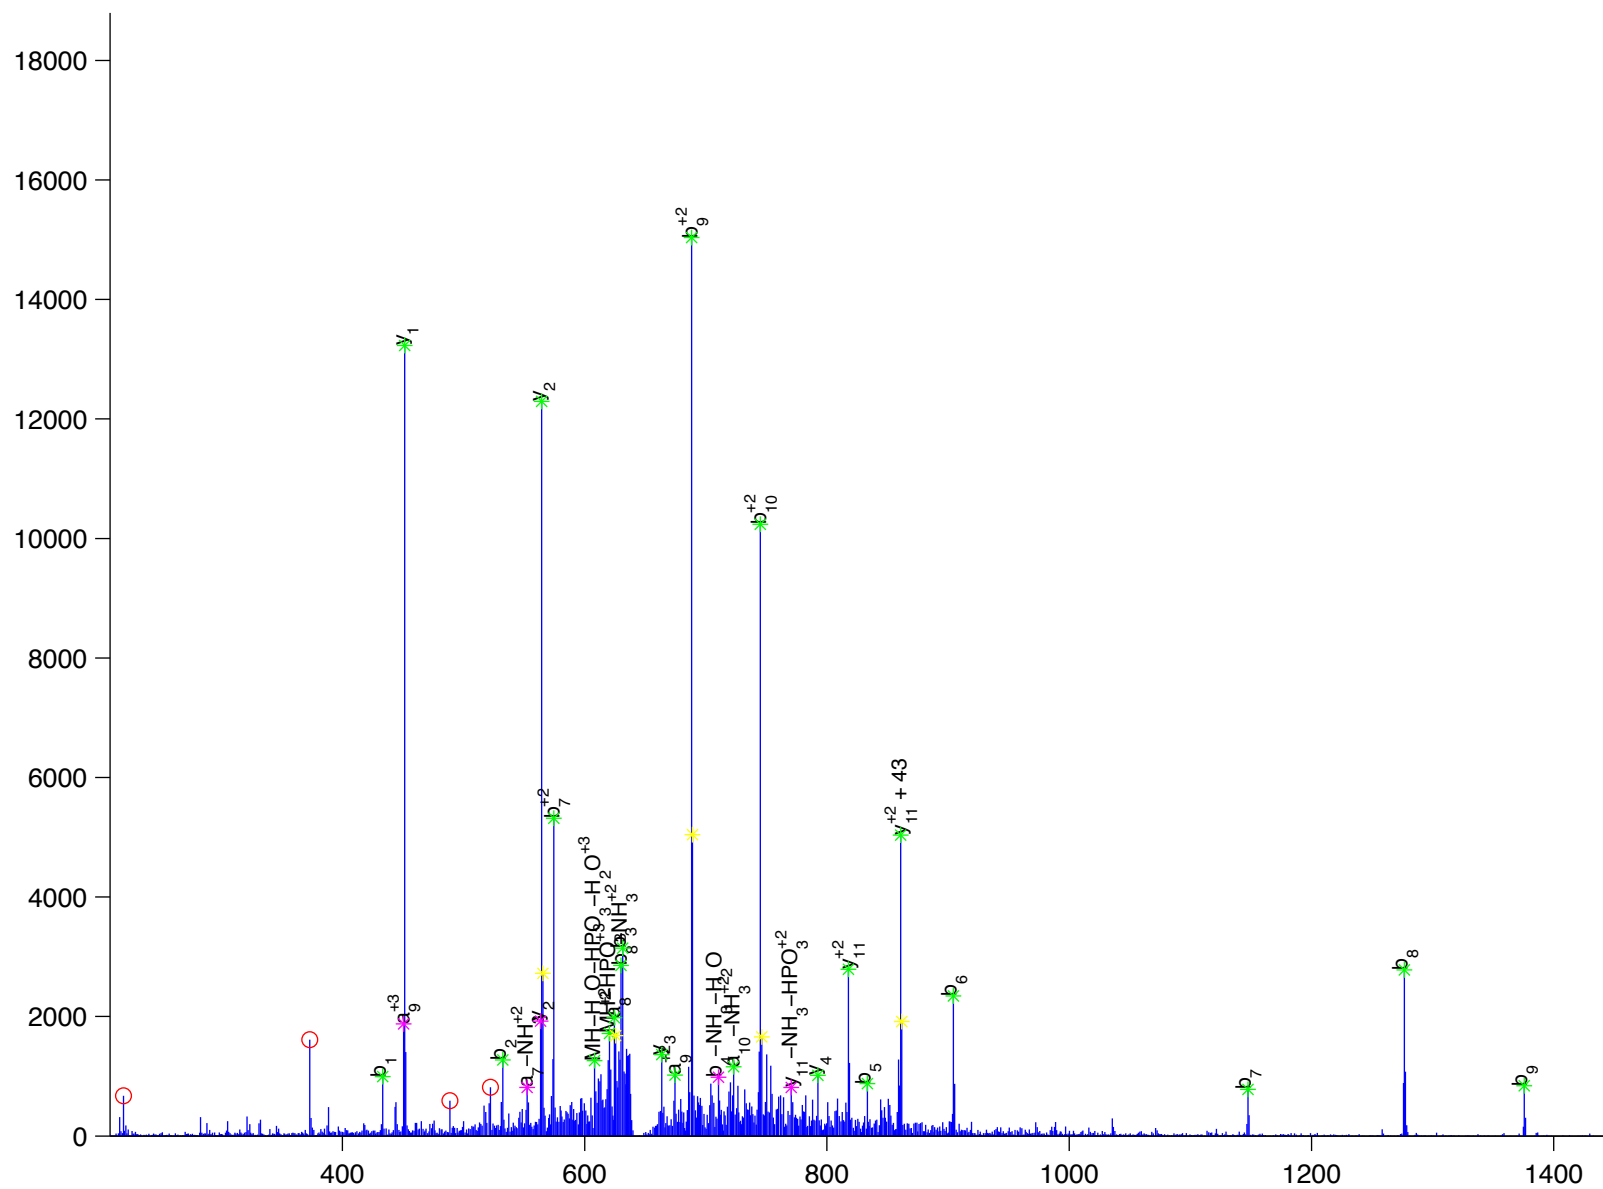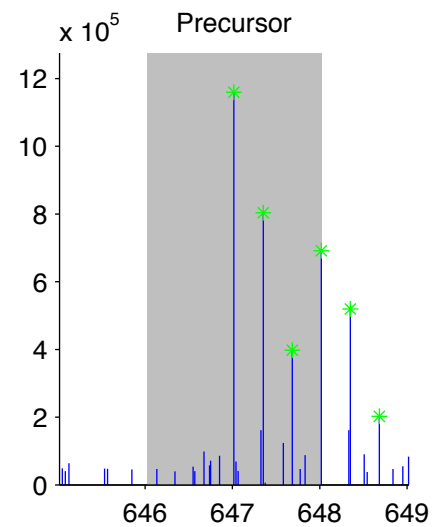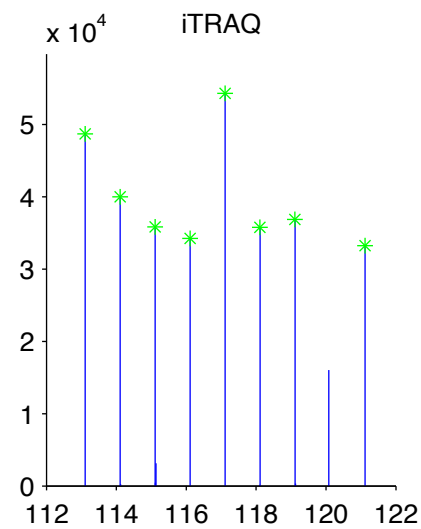

S[V]D[Q]D[S]Q[P]V[y]C[N]L[E]S[L]G

leucine rich repeat containing 25

Charge State: +3

Scan Number: 4951

File Name: 100905ptp1blivers\_ncHFD\_basal.raw

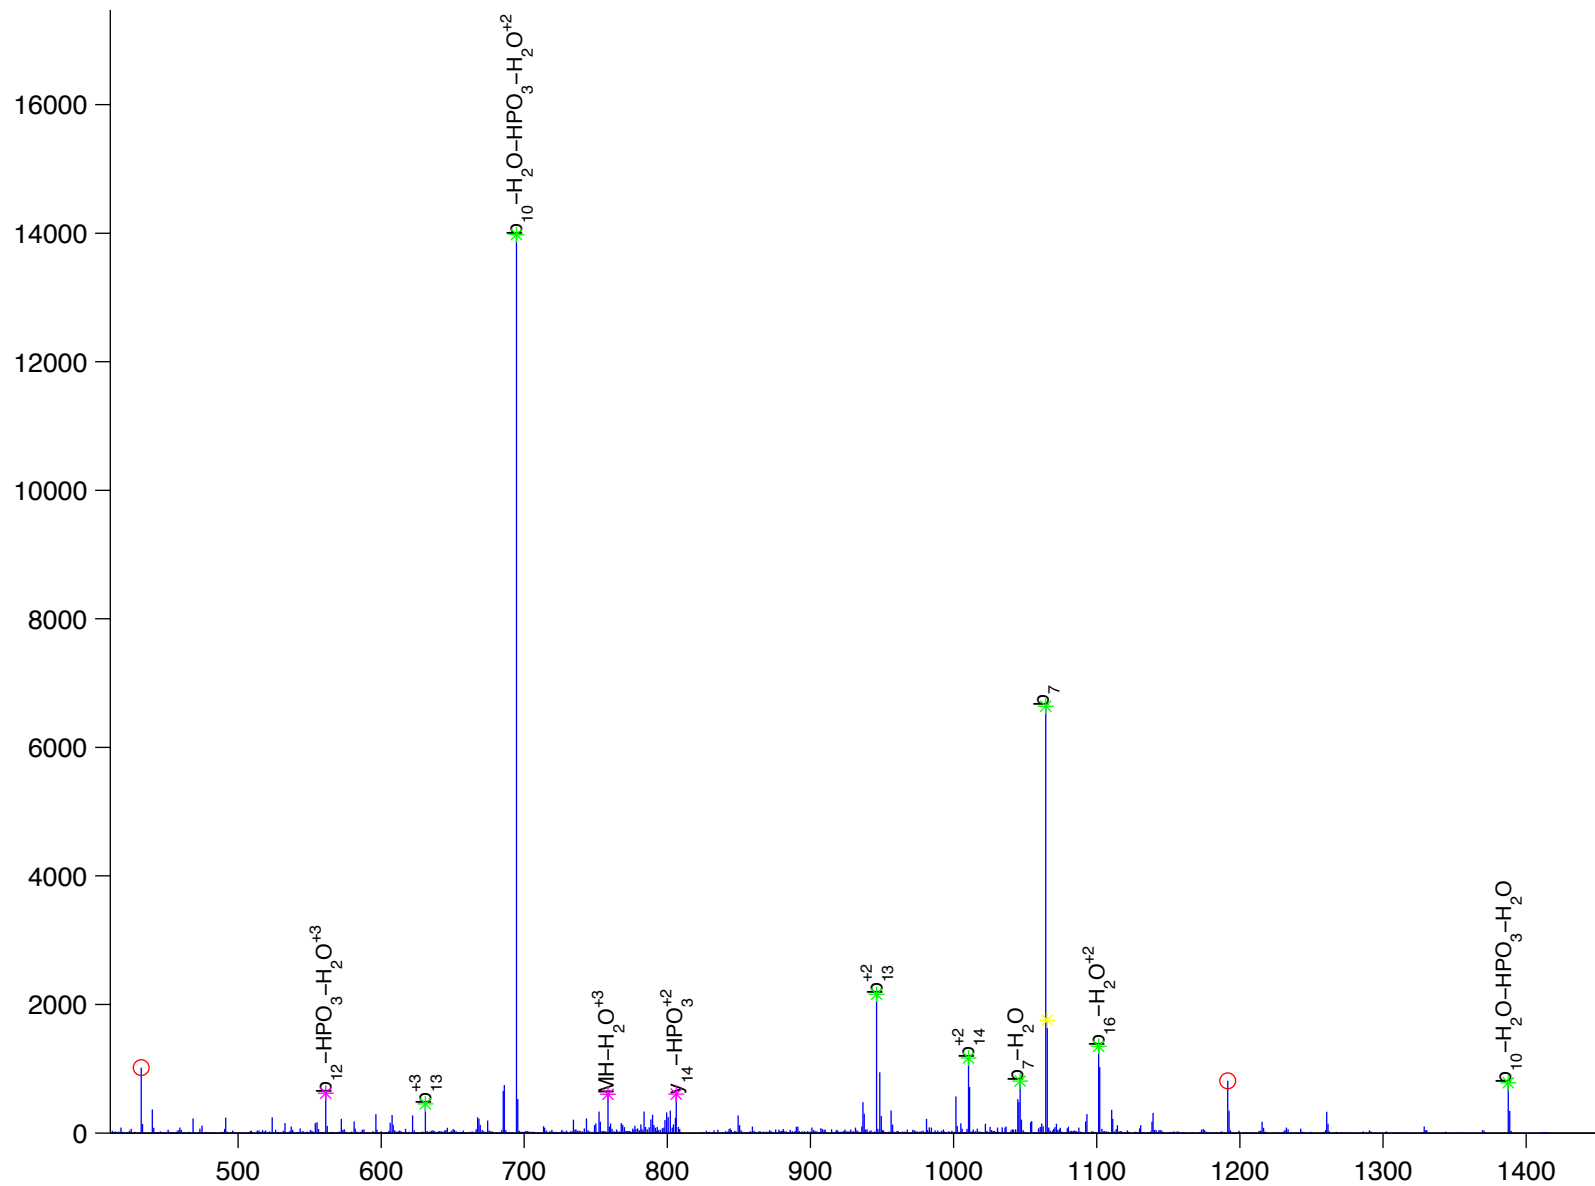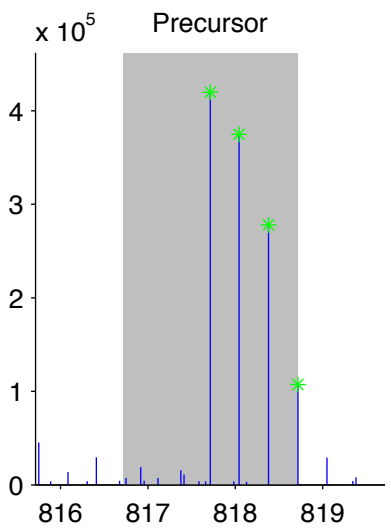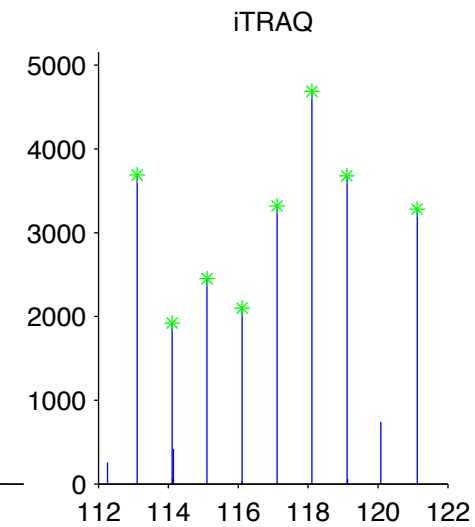

S [ E ] G [ D ] T [ A ] y [ G ] Q [ Q ] V [ Q ] P [ N ] T [ W ] K

LIM domain containing preferred translocation partner in lipoma

Charge State: +3

Scan Number: 5758

File Name: 090807ptp1blivers\_M\_HFD\_basal.raw

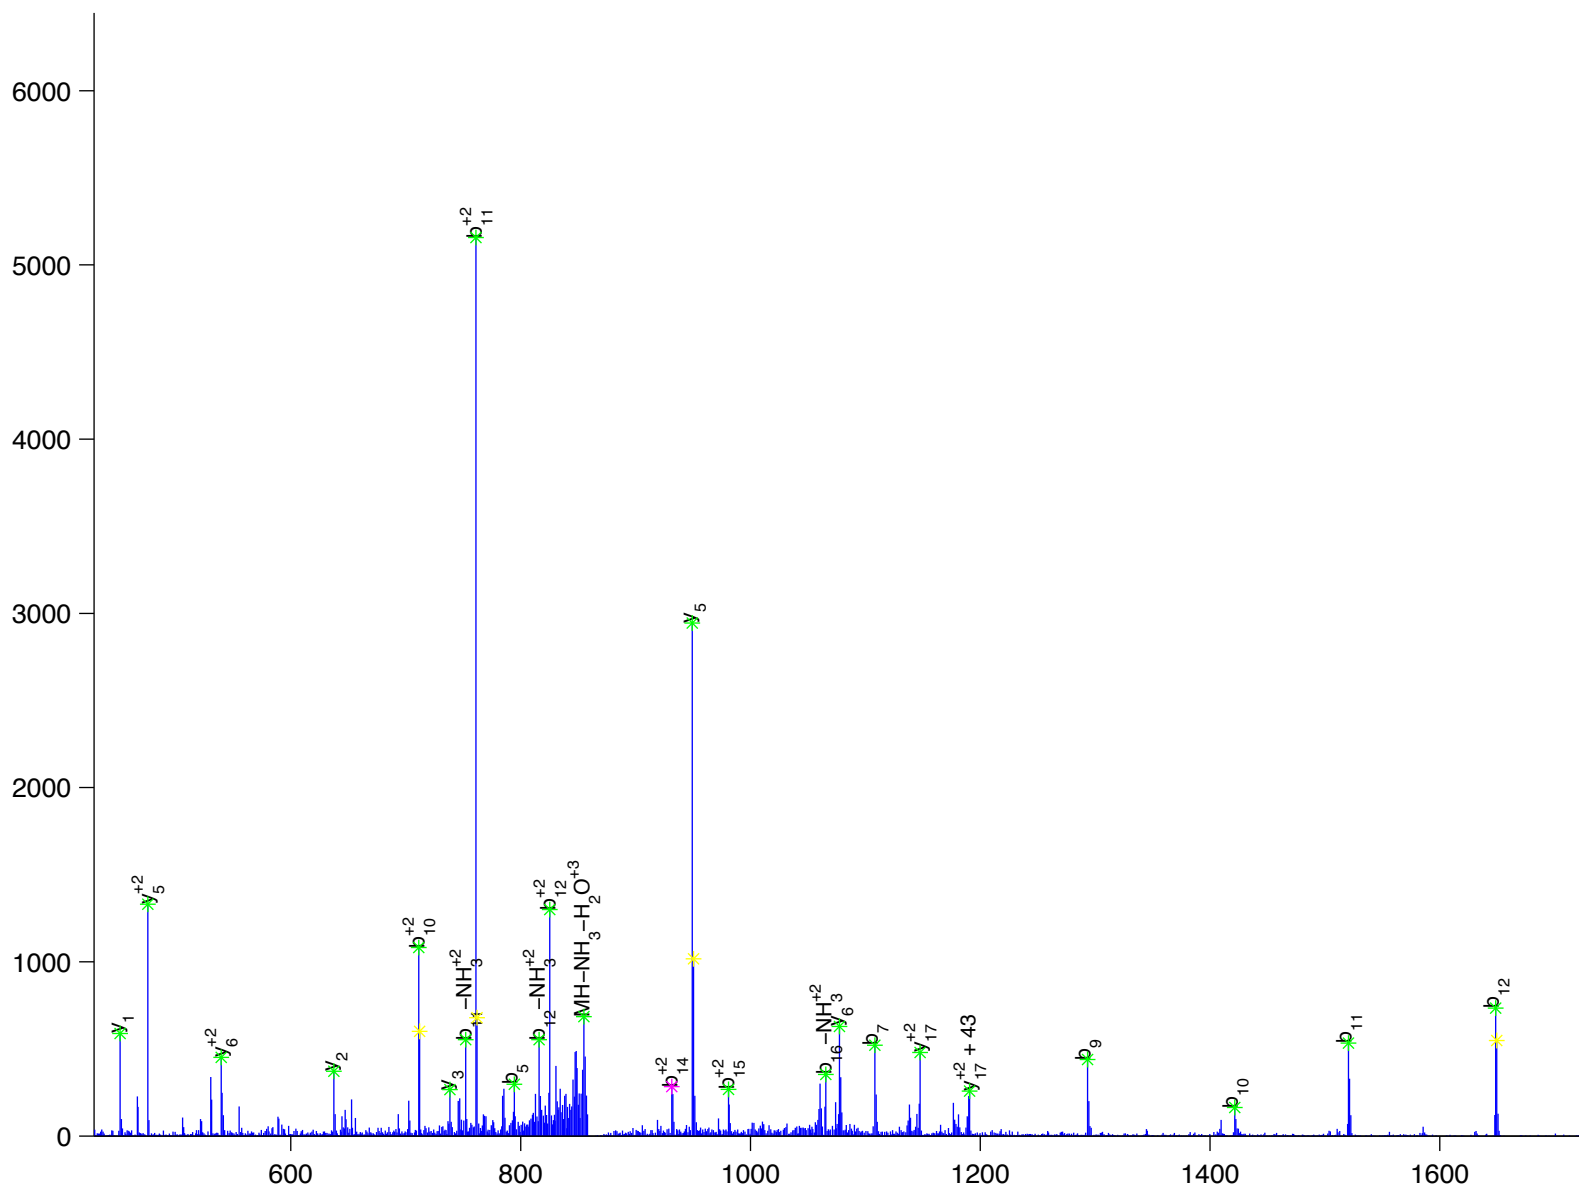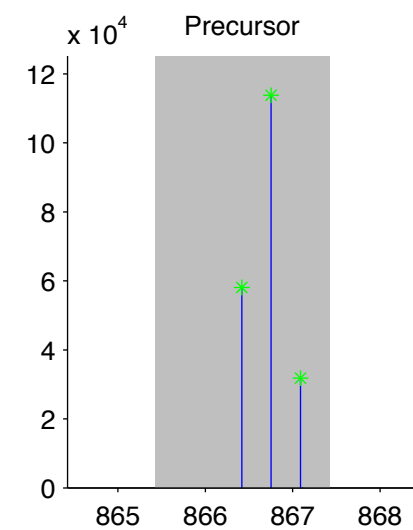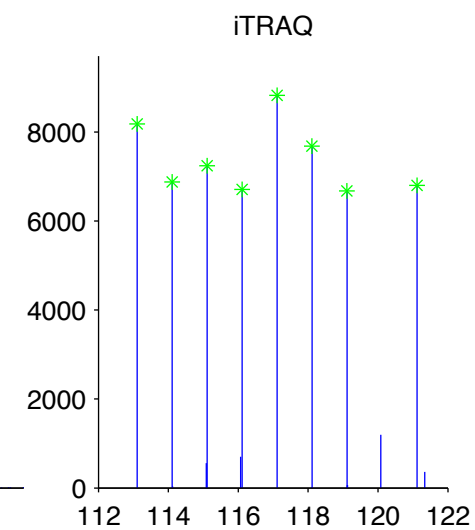



G[V]N[I]G[G]A[G]S[Y]I[y]E[K]P[Q]T[E]A[P]Q[V]T[G]P[I]E[V]P[V]V[R]

LIM only protein HLP

Charge State: +5

Scan Number: 8959

File Name: 090807ptp1blivers\_M\_HFD\_basal.raw

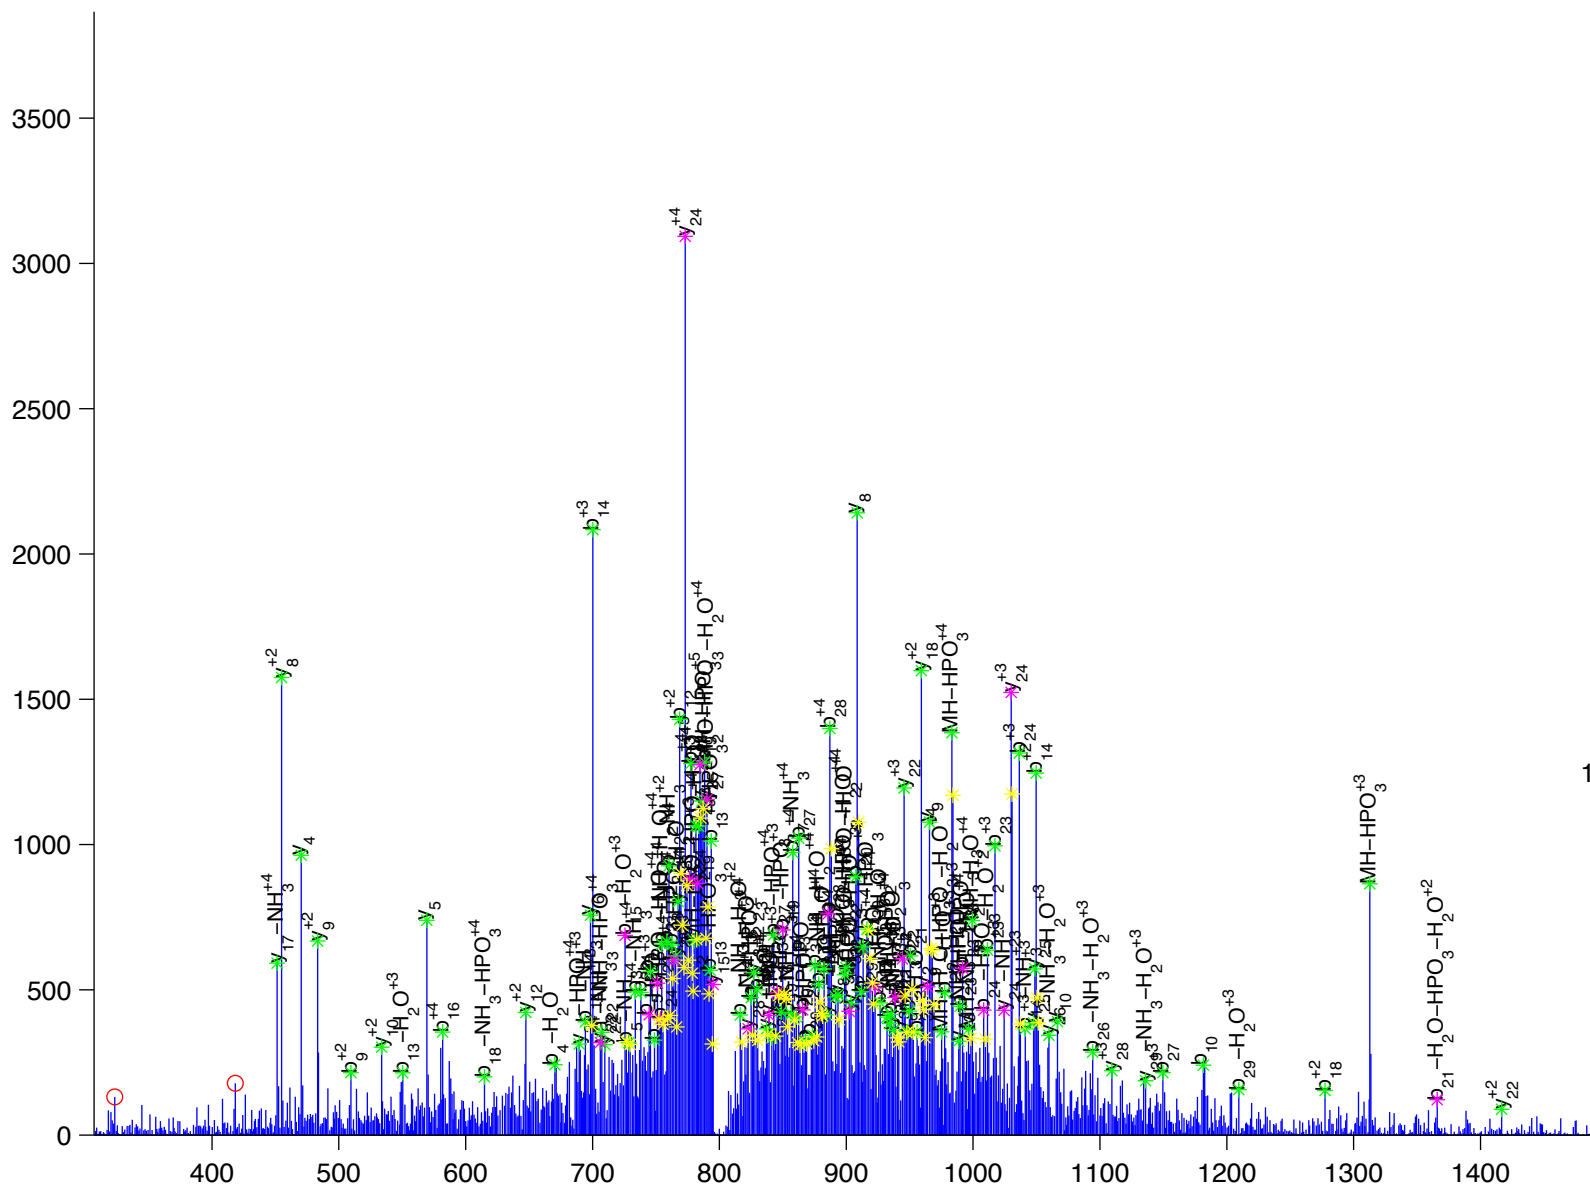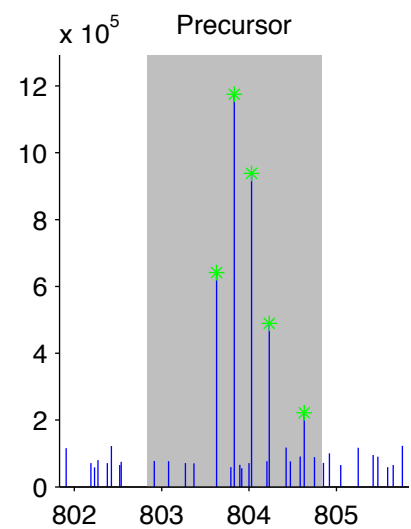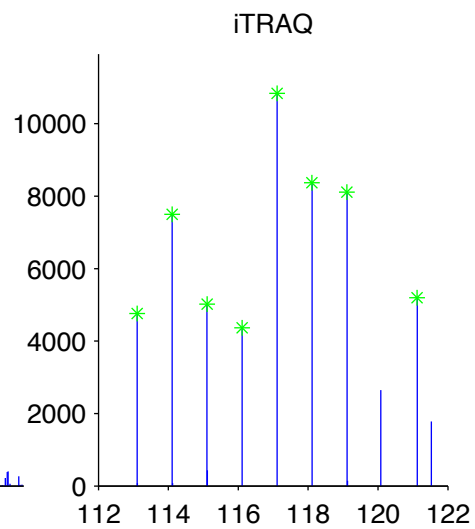

V[D]T[D]G[N]G[y]I[S]C[N]E[L]N[D]L[F]K

lymphocyte cytosolic protein 1

Charge State: +3

Scan Number: 6257

File Name: 100905ptp1blivers\_ncHFD\_basal.raw

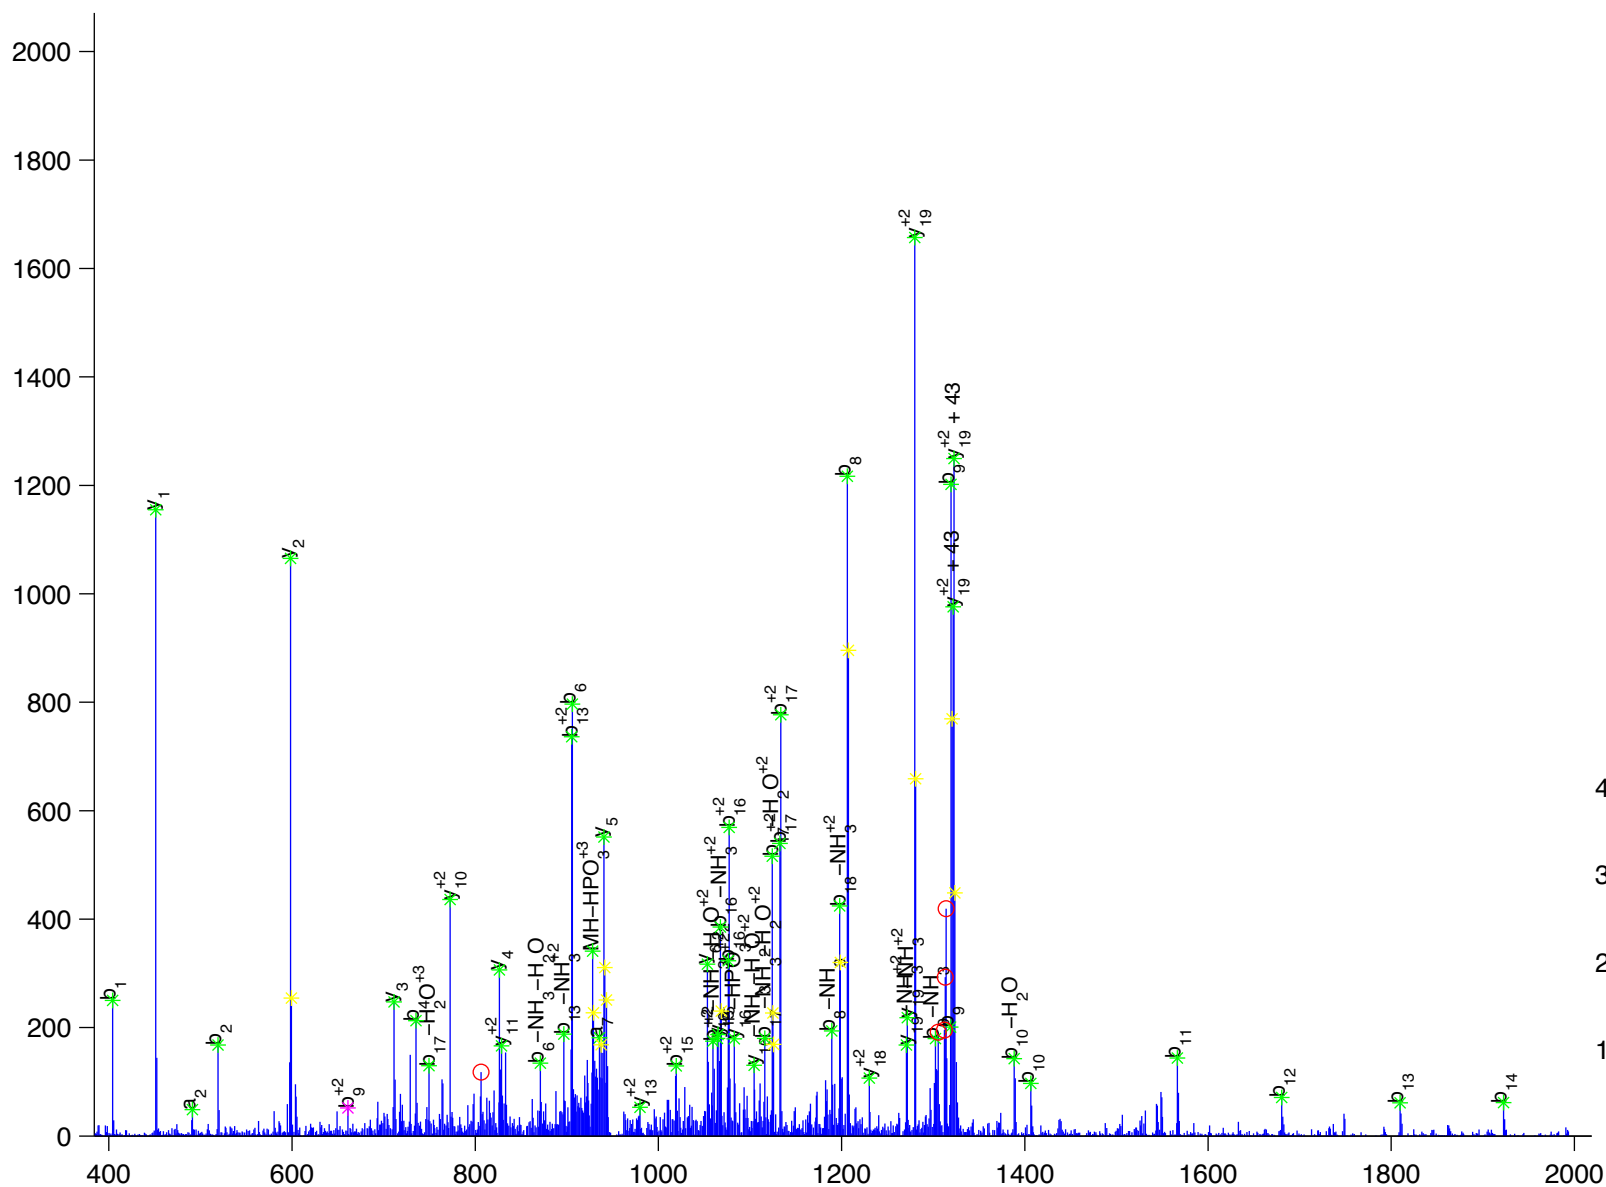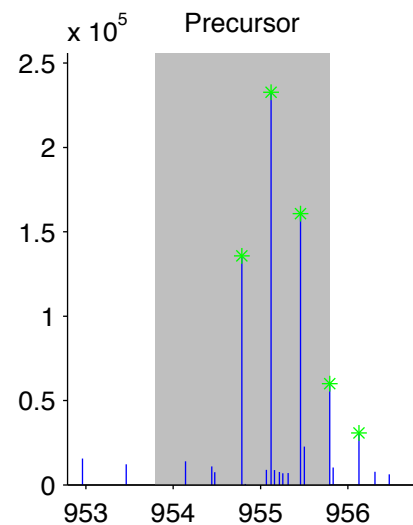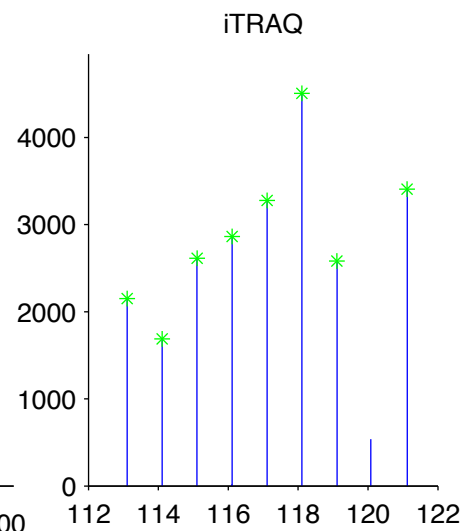

E[V]G[V]y[E]A[L]K[D]D[S]W[L]K

malate dehydrogenase 1, NAD (soluble)

Charge State: +4

Scan Number: 6198

File Name: 100908ptp1blivers\_ncHFD3\_basal.raw

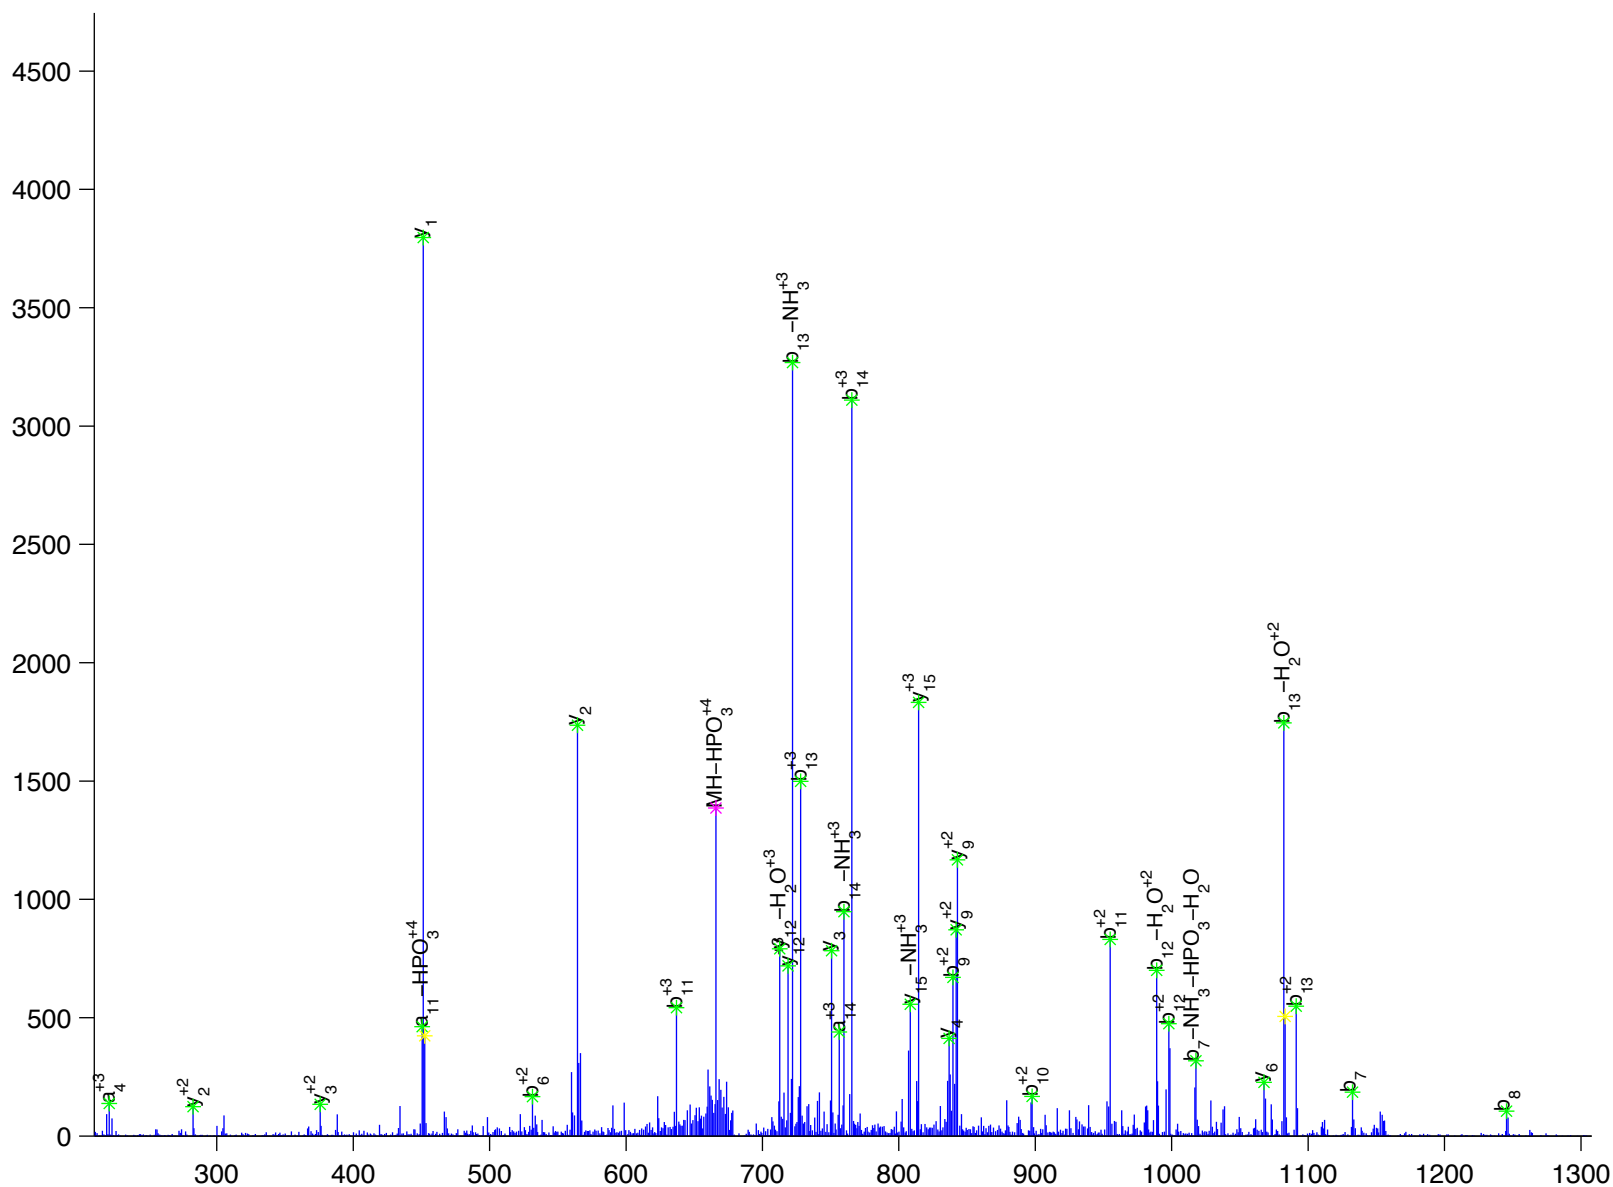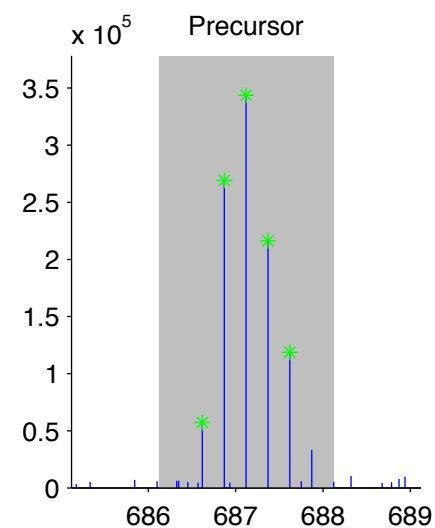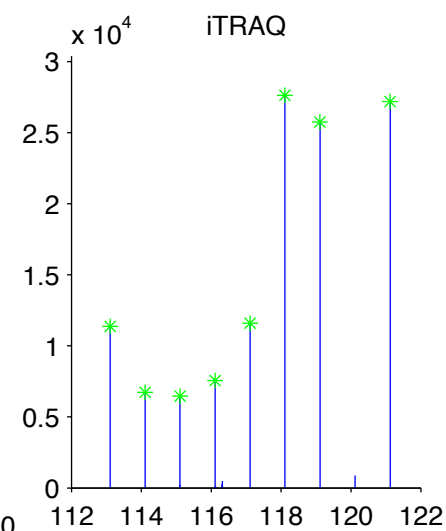

I [E] [D] [P] [V] y [G] [V] [Y] [Y] [V] [D] [H] [I] [N] R

membrane associated guanylate kinase, WW and PDZ domain containing 1 isoform a

Charge State: +3

Scan Number: 6080

File Name: 100908ptp1blivers\_ncHFD3\_basal.raw

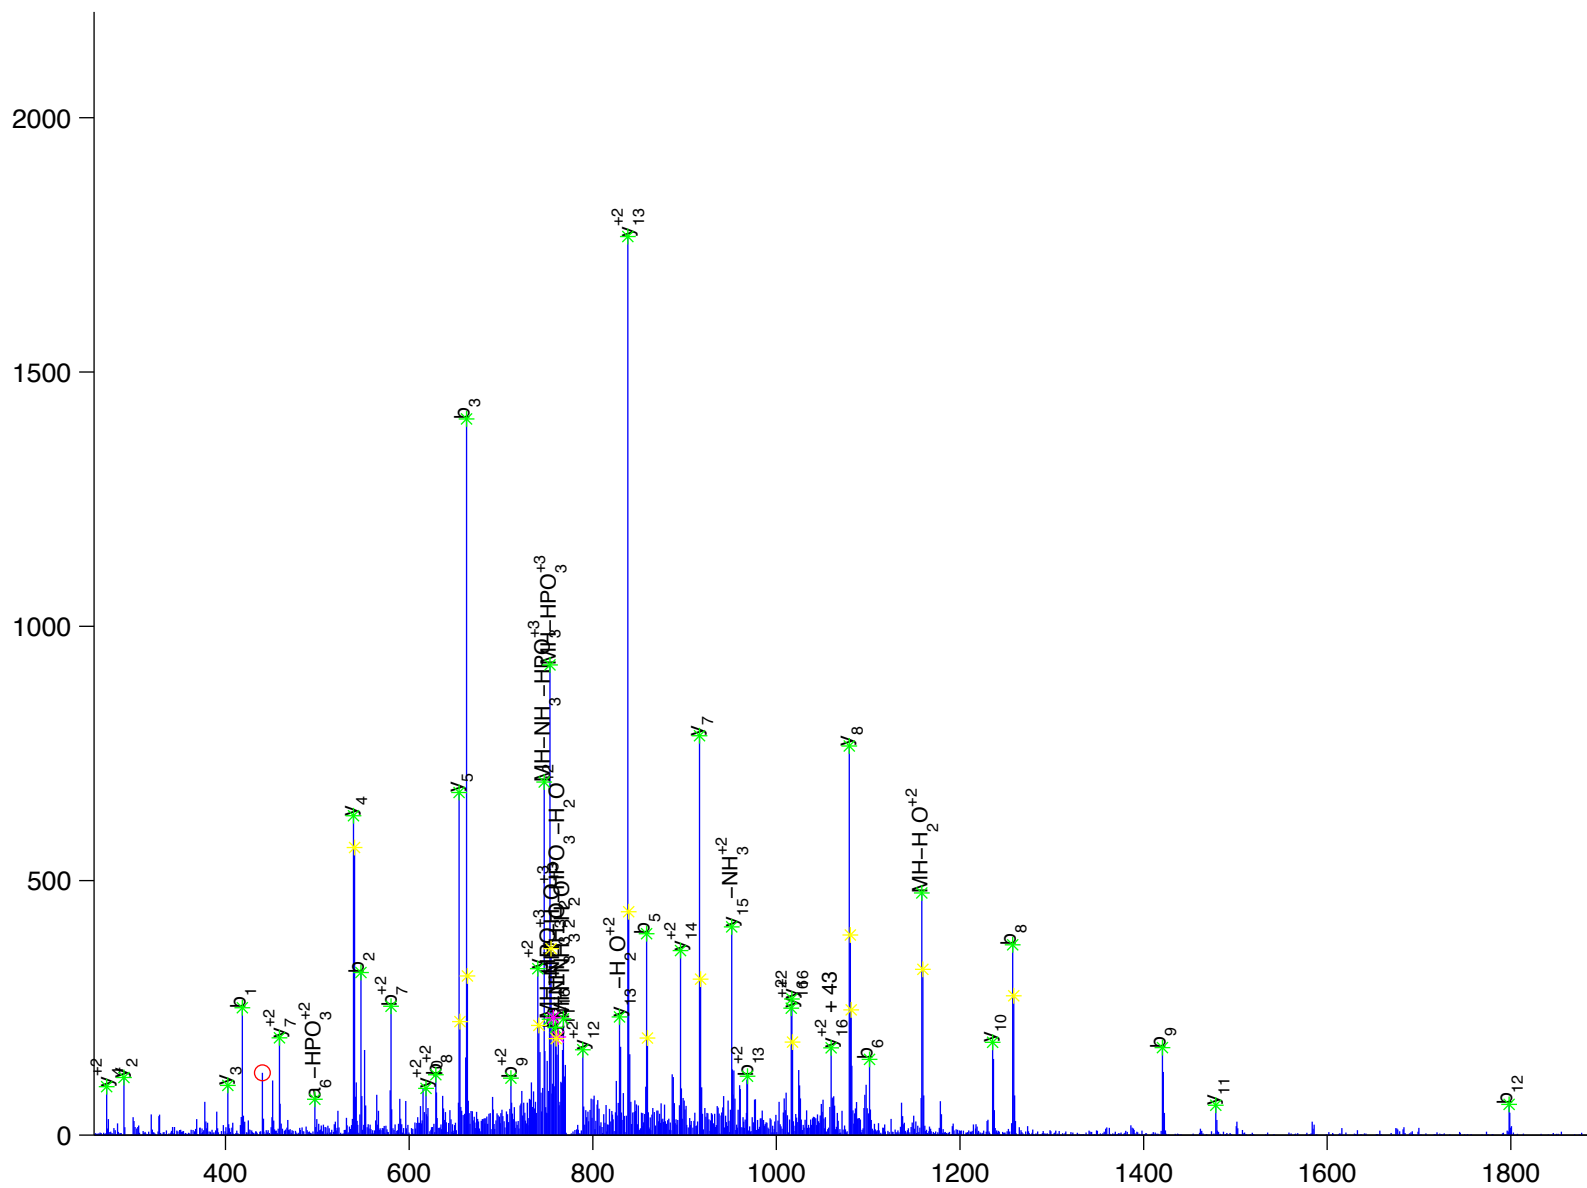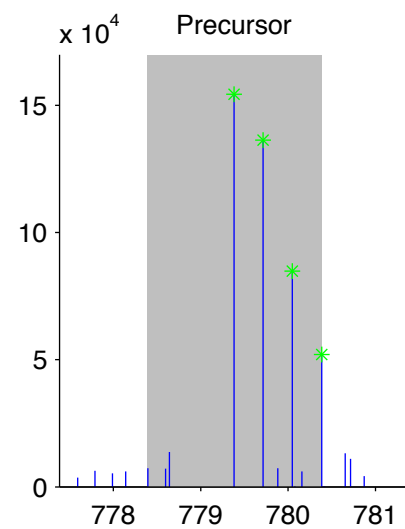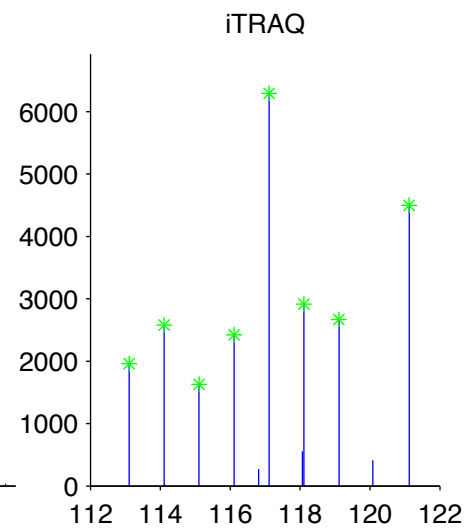

S[V]S[P]T[T]E[M]V[S]N[E]S[V]D[y]R

met proto-oncogene

Charge State: +3

Scan Number: 5067

File Name: 091130ptp1blivers\_hfd\_basal2.raw

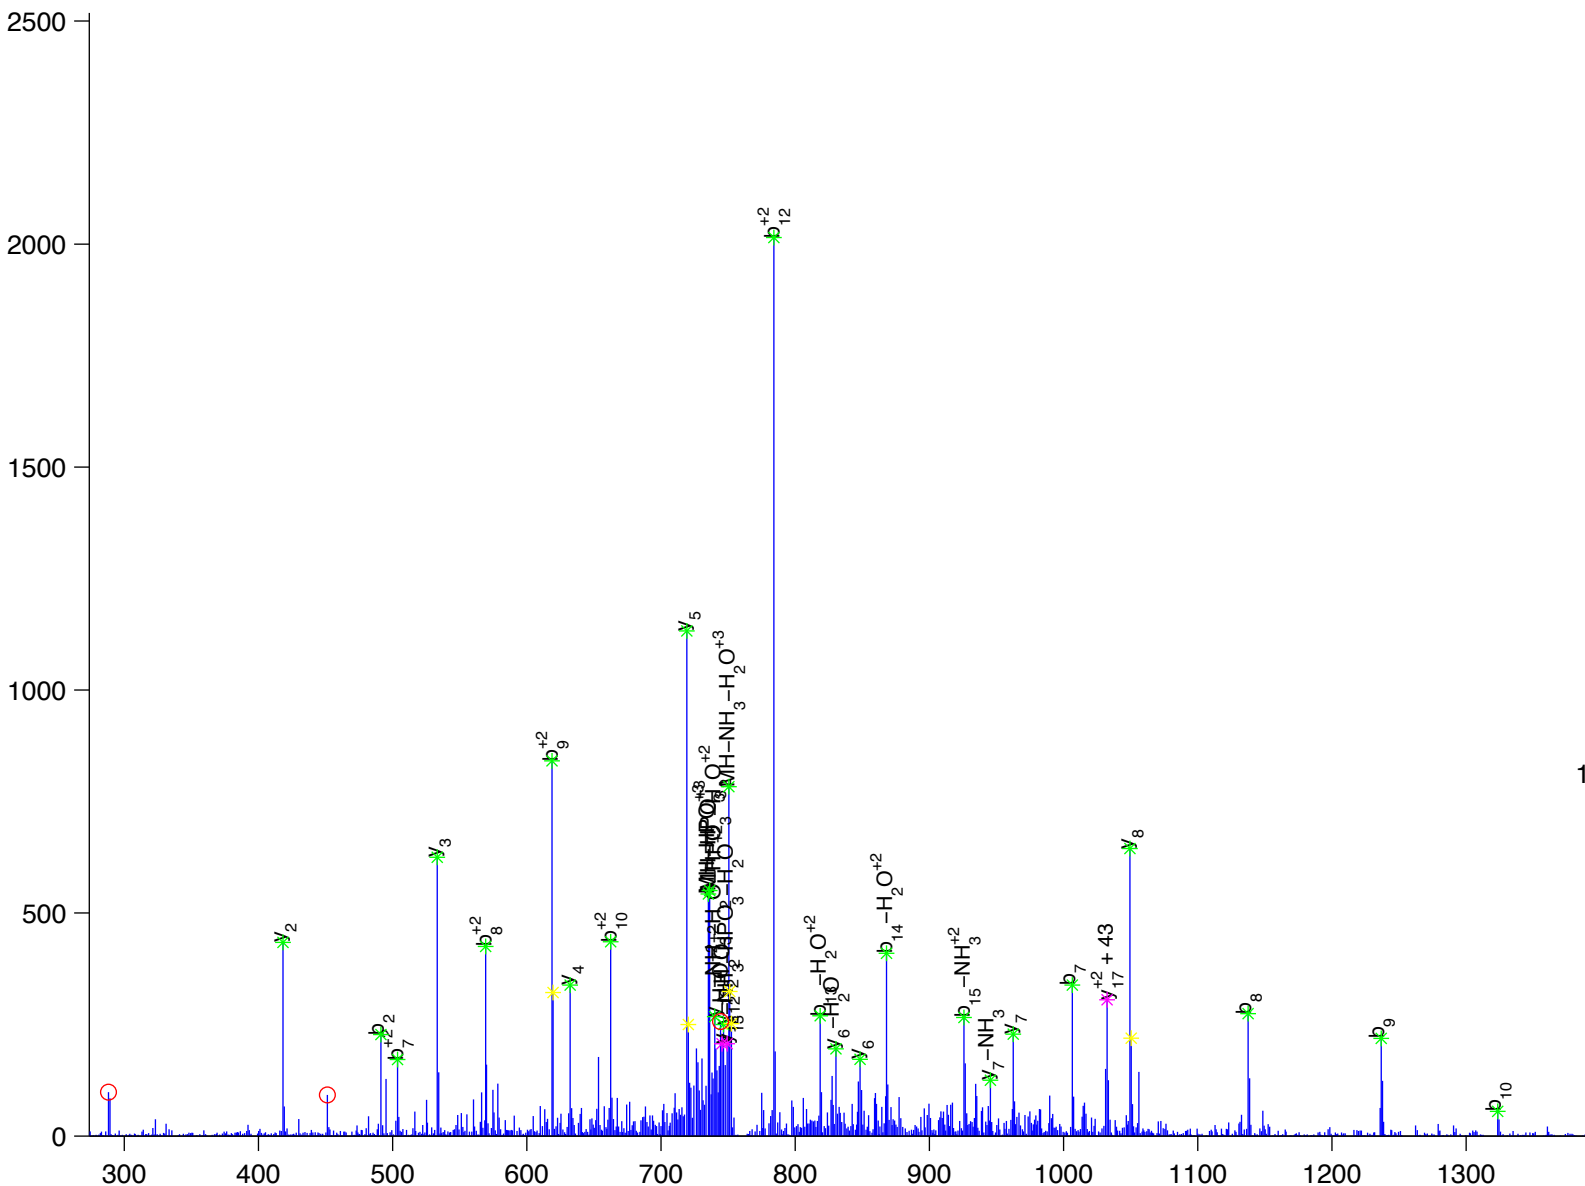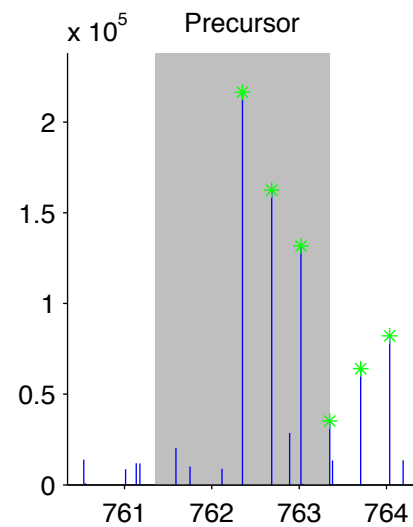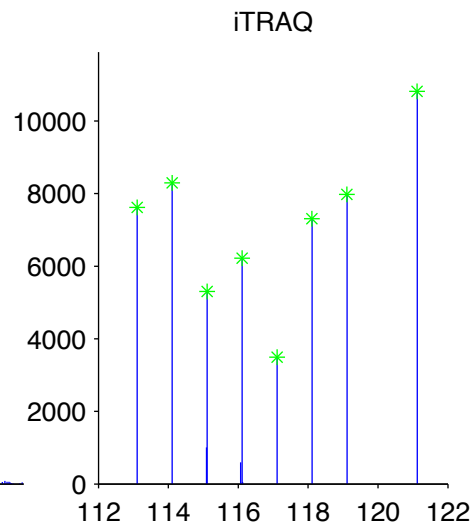

F V D L y G A Q K

mitochondrial trifunctional protein, alpha subunit

Charge State: +3

Scan Number: 6234

File Name: 091130ptp1blivers\_hfd\_basal2.raw

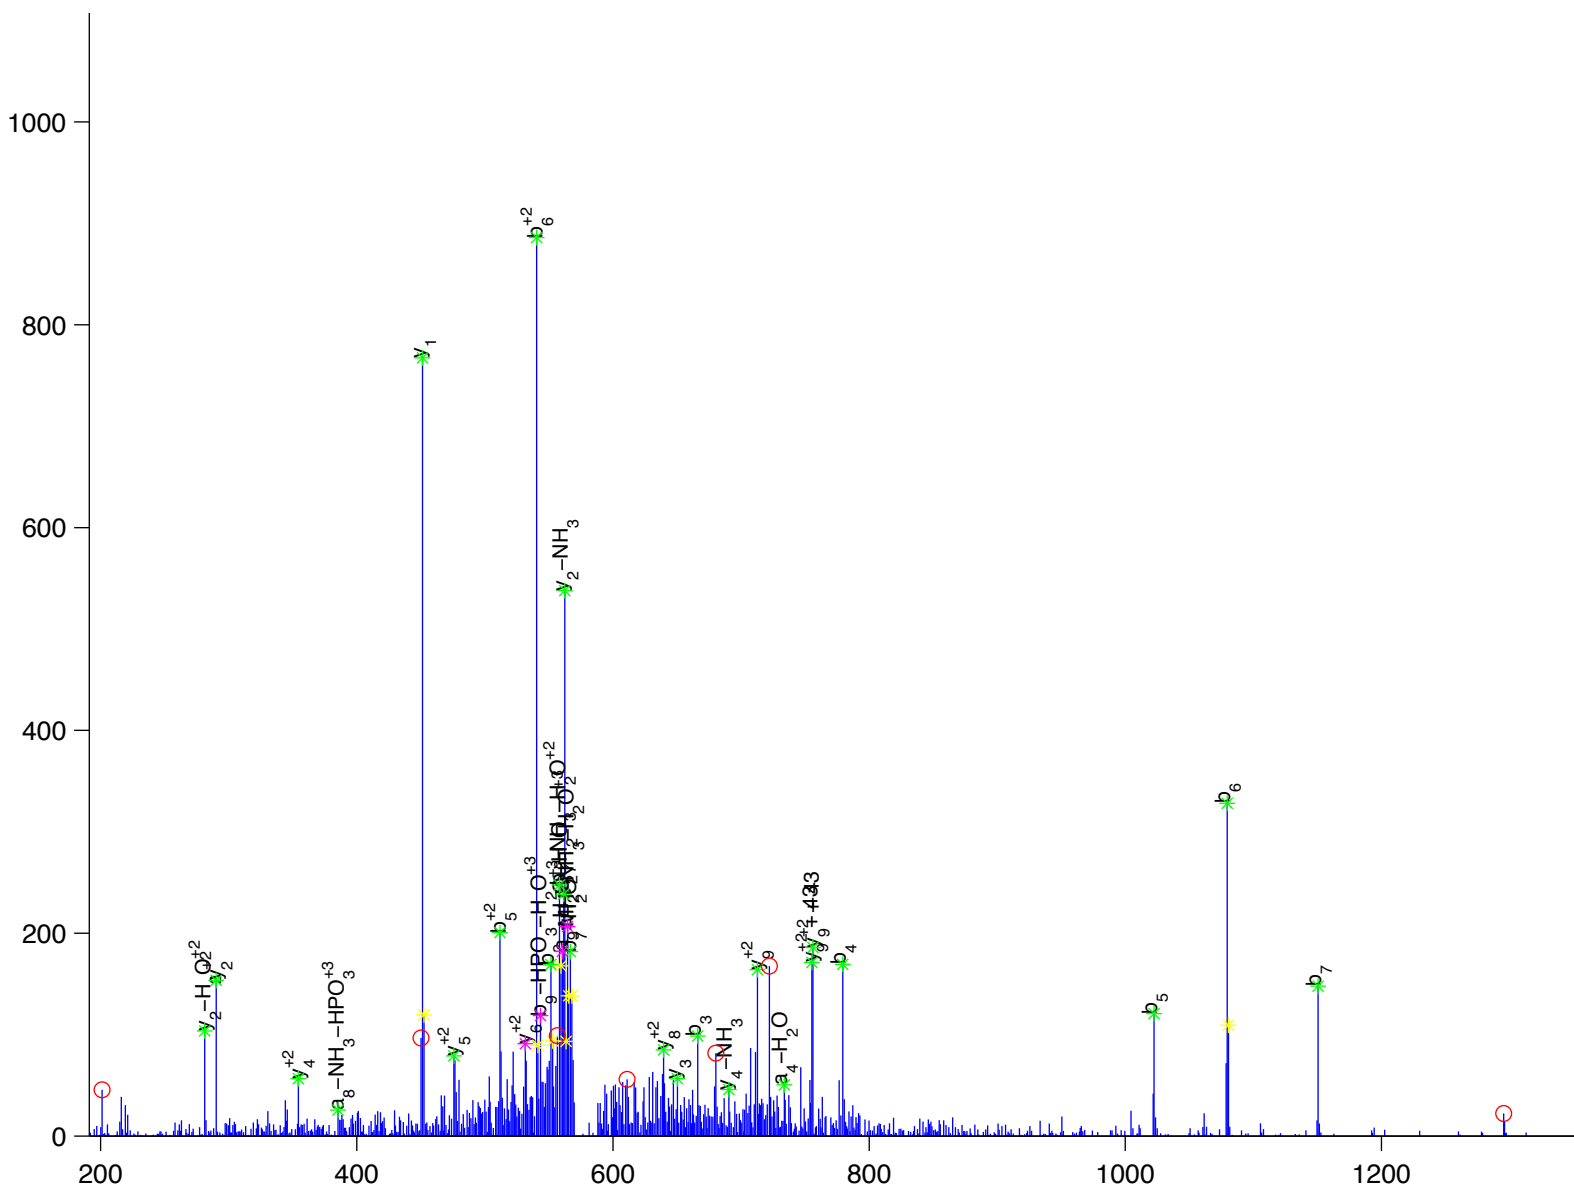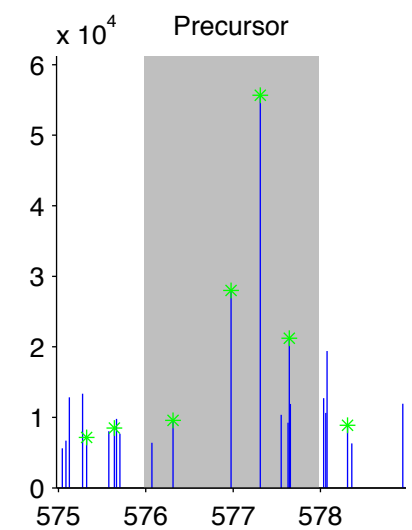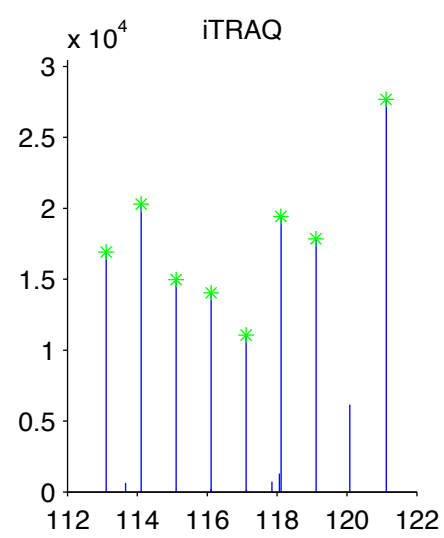

V[A]D[P]D[H]D[H]T[G]F[L]t[E]Y[V]A[T]R

mitogen activated protein kinase 1

Charge State: +3

Scan Number: 4993

File Name: 090806ptp1blivers\_M\_NC2.raw

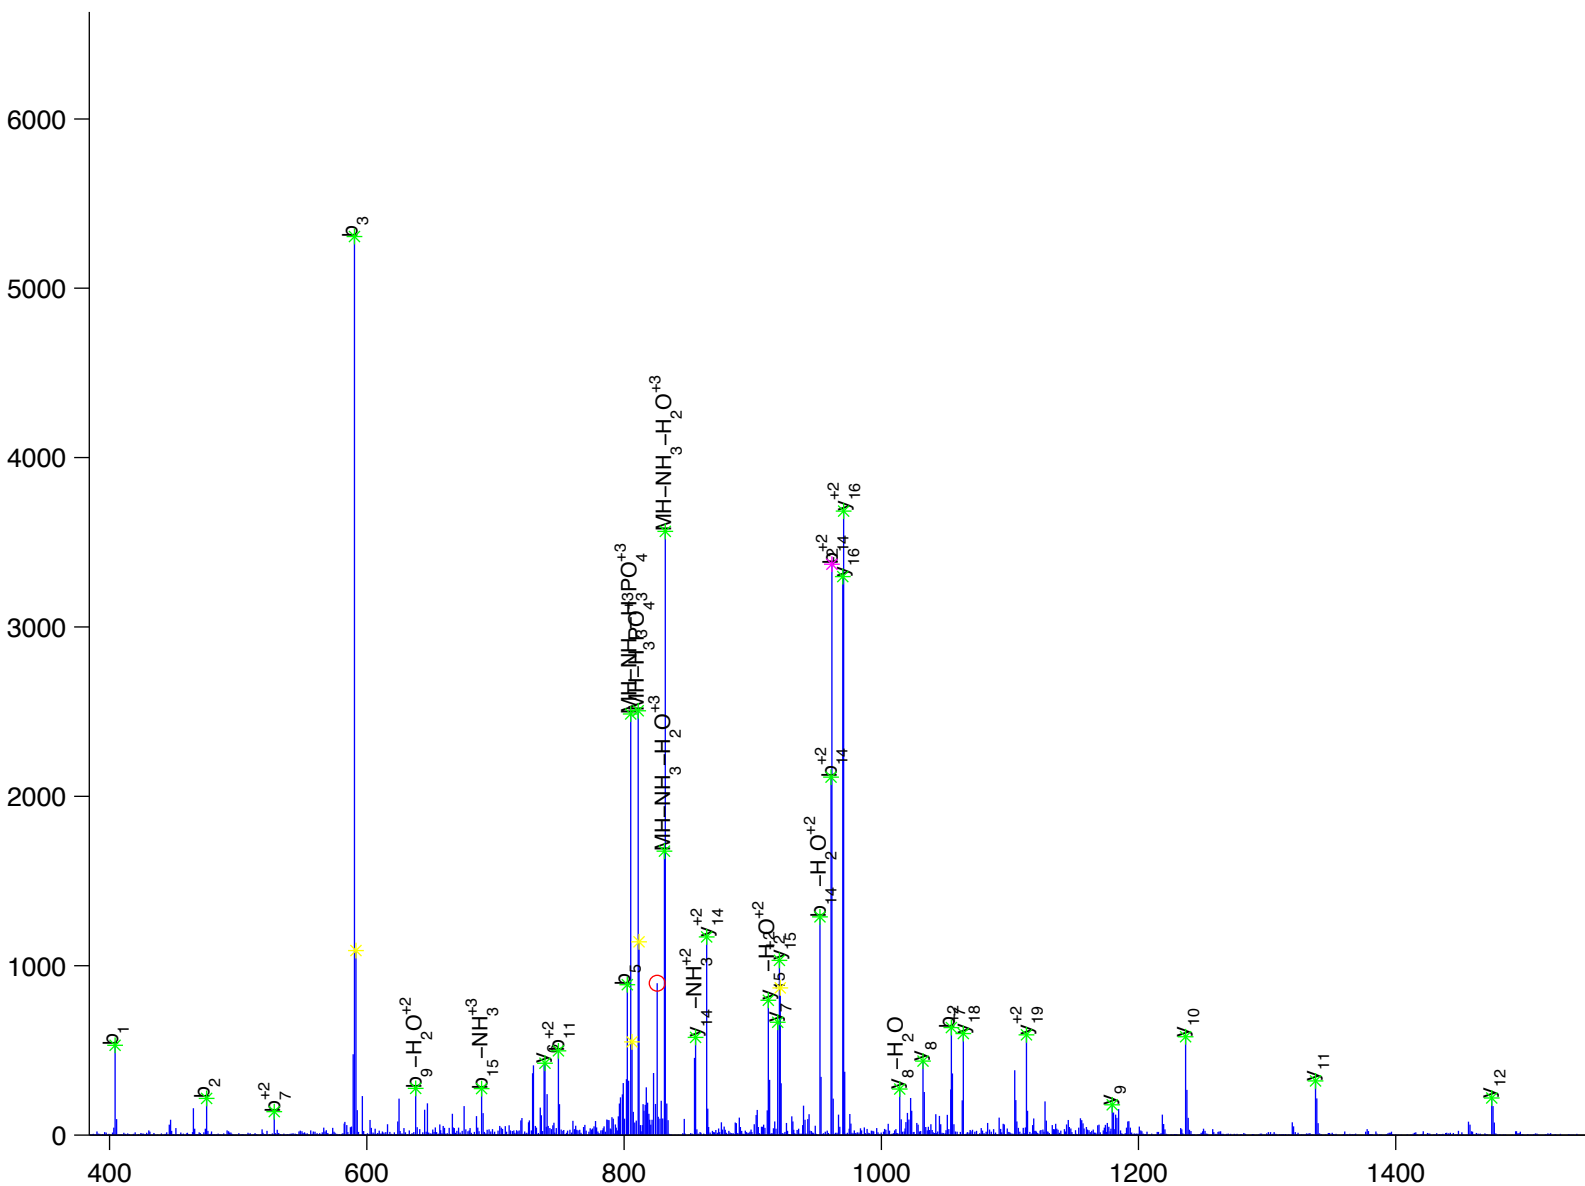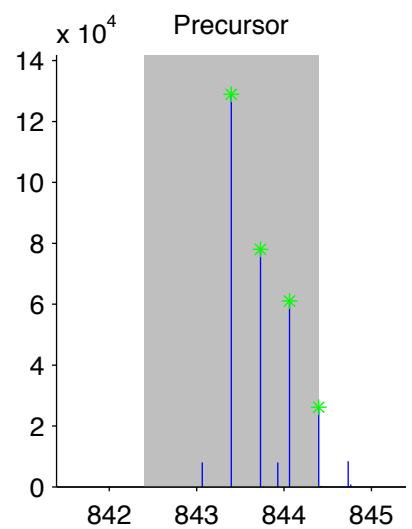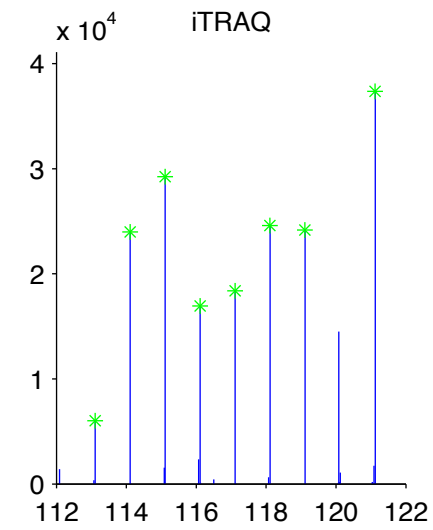

V [ A [ D [ P [ D [ H [ D [ H [ T [ G [ F [ L [ T [ E ] Y ] V ] A ] t ] R ]

mitogen activated protein kinase 1

Charge State: +3

Scan Number: 4993

File Name: 090806ptp1blivers\_M\_NC2.raw

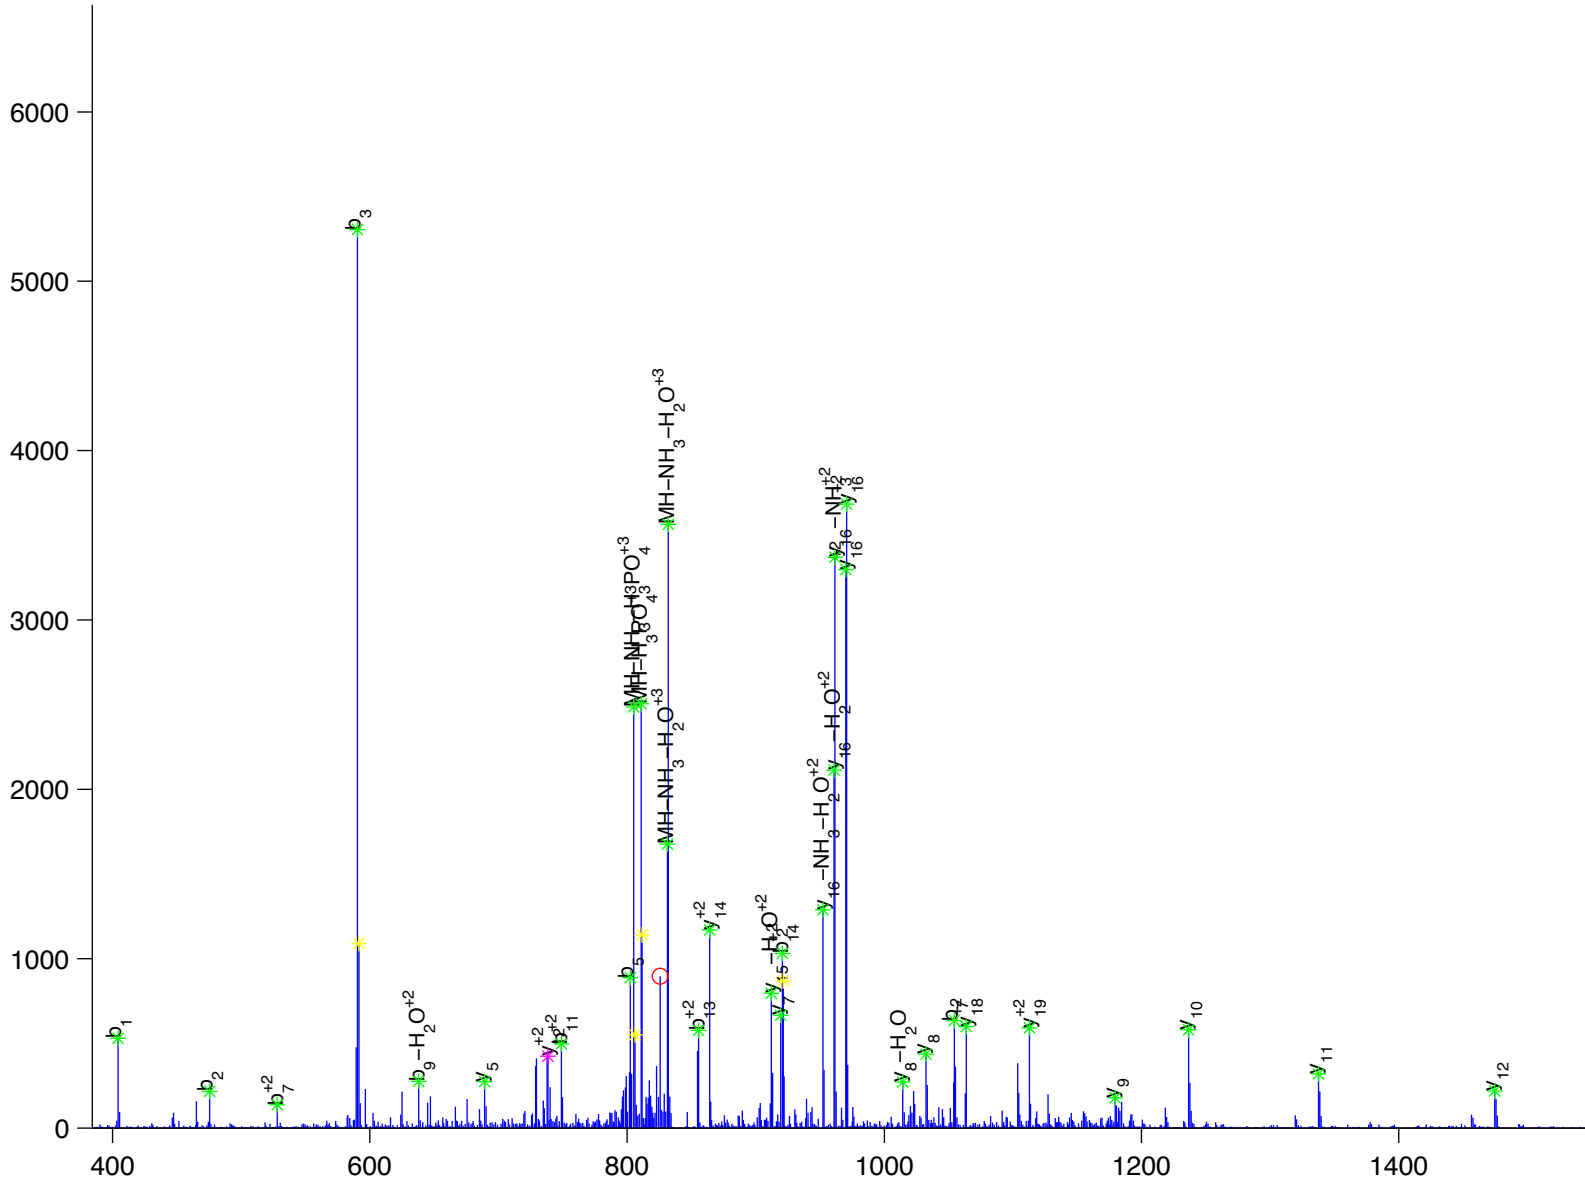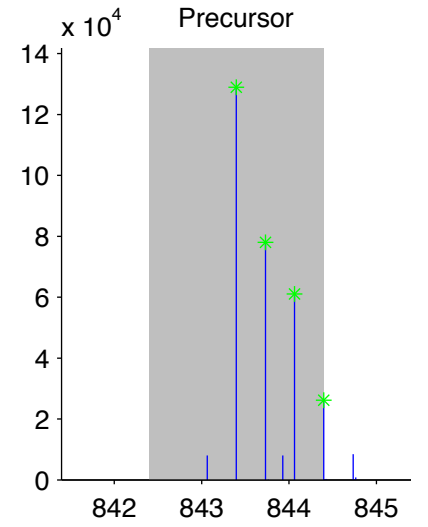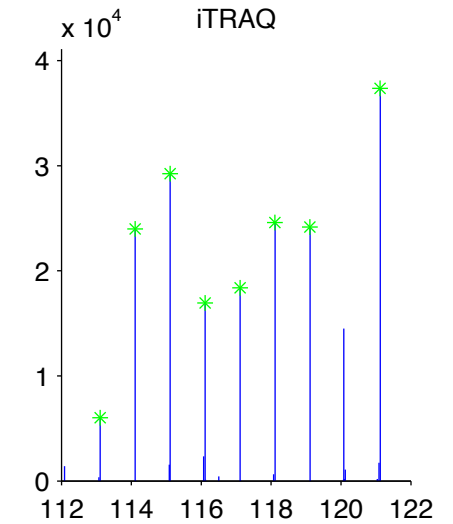



V[A]D[P]D[H]D[H]T[G]F[L]T[E]y[V]A[T]R

mitogen activated protein kinase 1

Charge State: +3

Scan Number: 5589

File Name: 100908ptp1blivers\_ncHFD3\_basal.raw

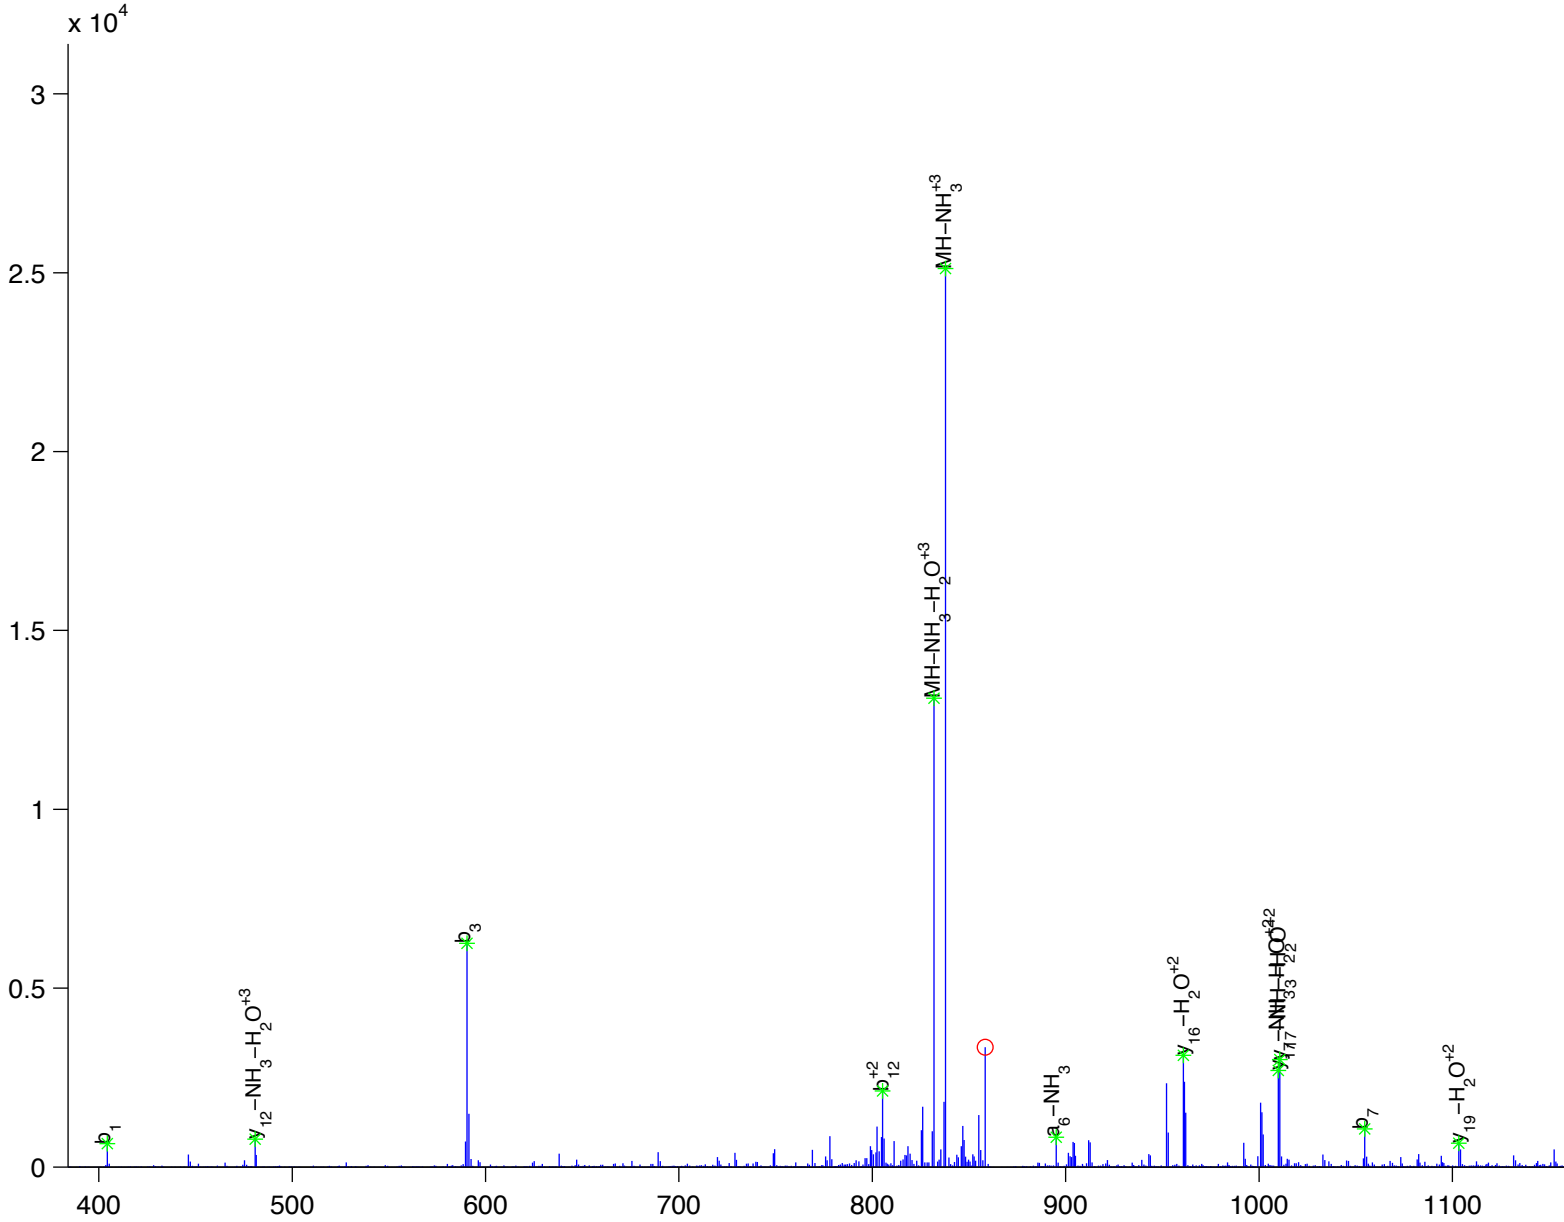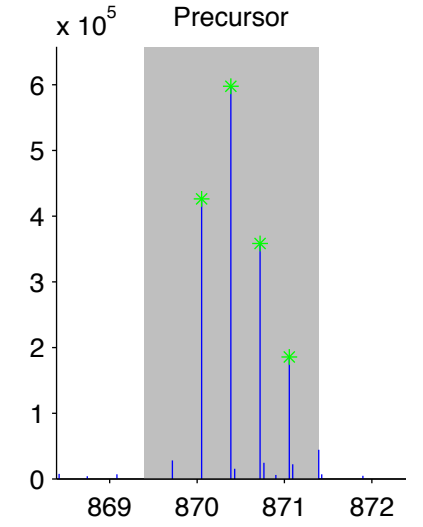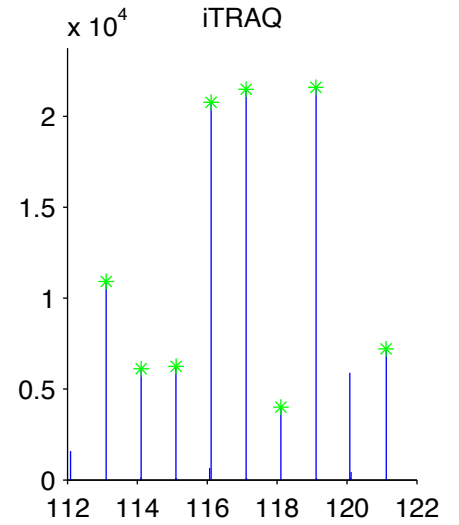

H [ T ] [ D ] [ D ] [ E ] [ M ] [ T ] [ G ] y [ V ] [ A ] [ T ] R

mitogen activated protein kinase 14

Charge State: +3

Scan Number: 3124

File Name: 100905ptp1blivers\_ncHFD\_basal.raw

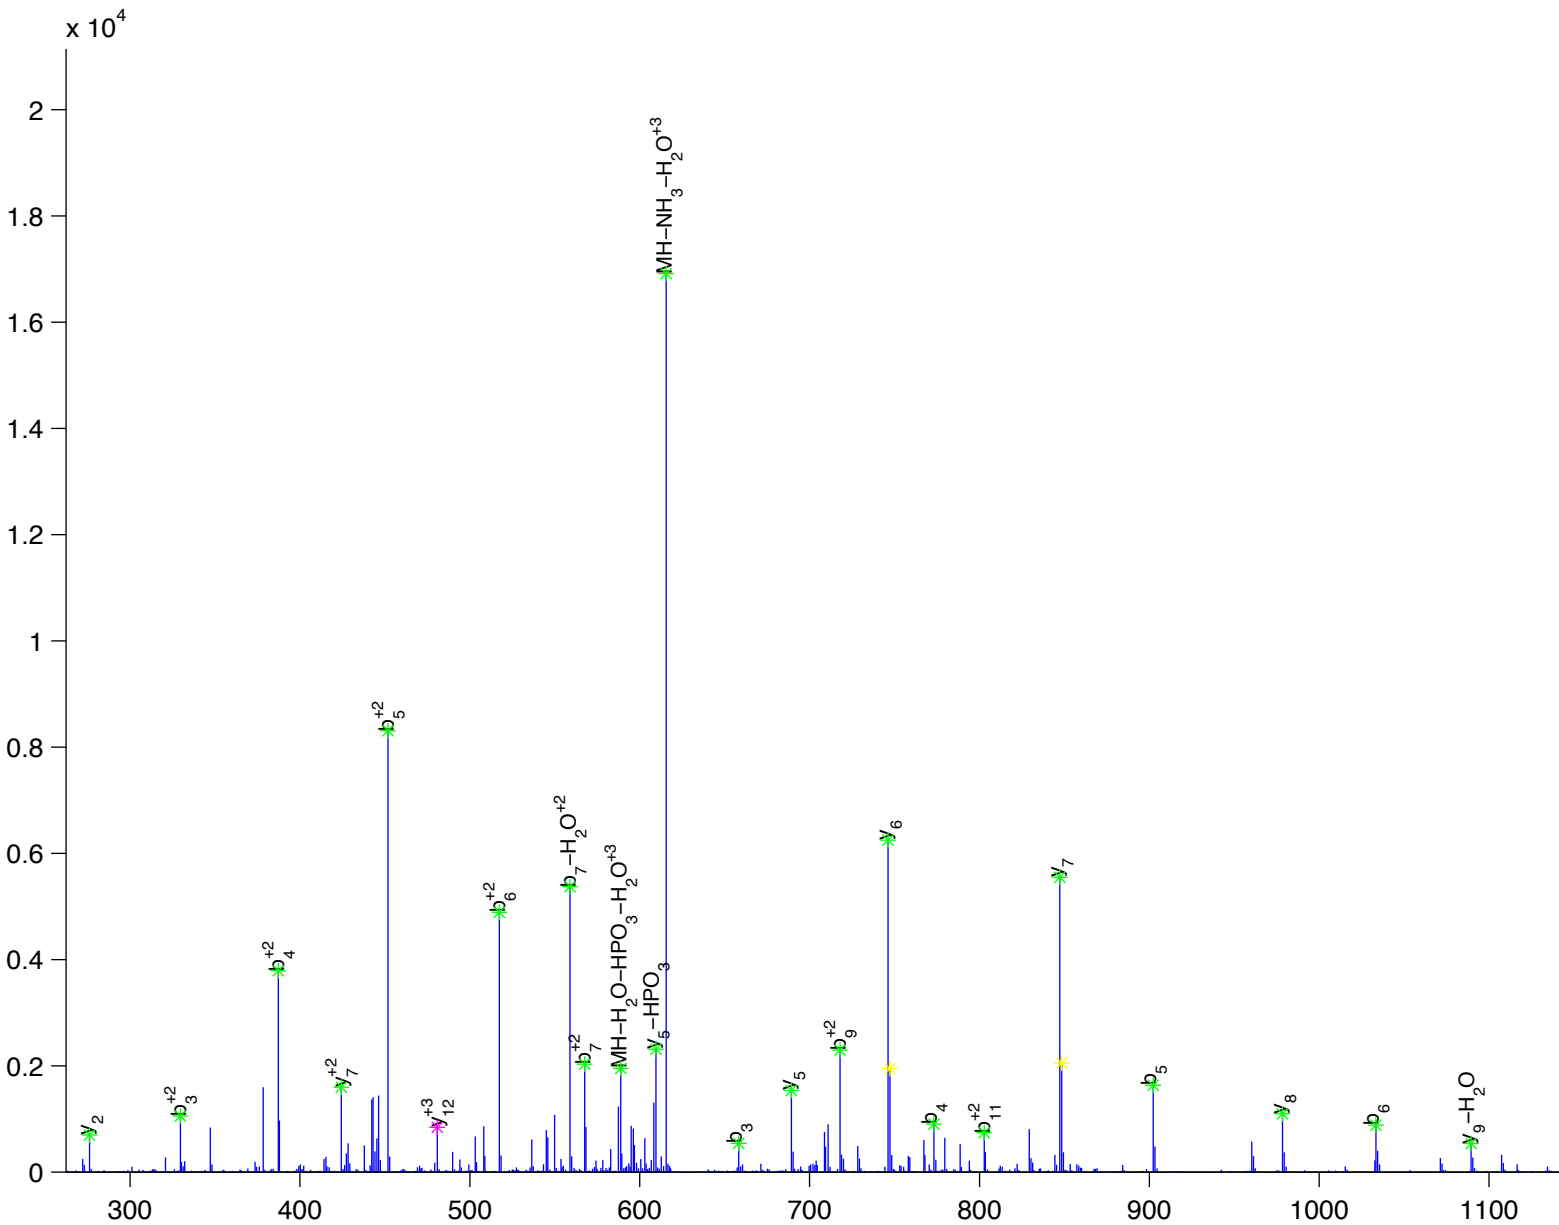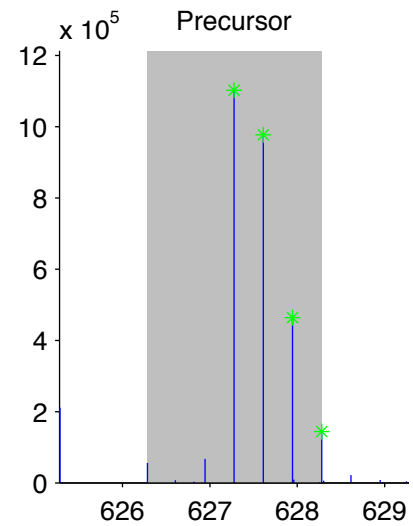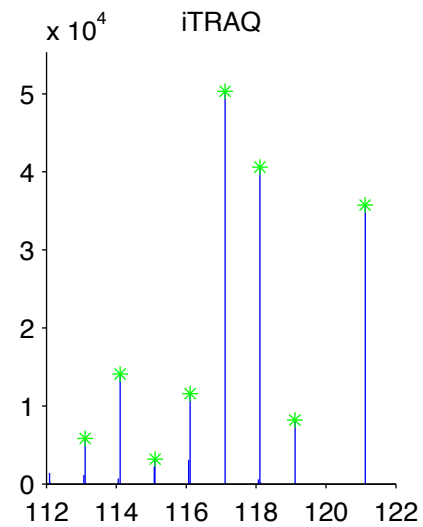



I [A] [D] [P] [E] [H] [D] [H] [T] [G] [F] [L] [T] [E] y [V] [A] [T] [R]

mitogen activated protein kinase 3

Charge State: +3

Scan Number: 4631

File Name: 100905ptp1blivers\_ncHFD\_basal.raw

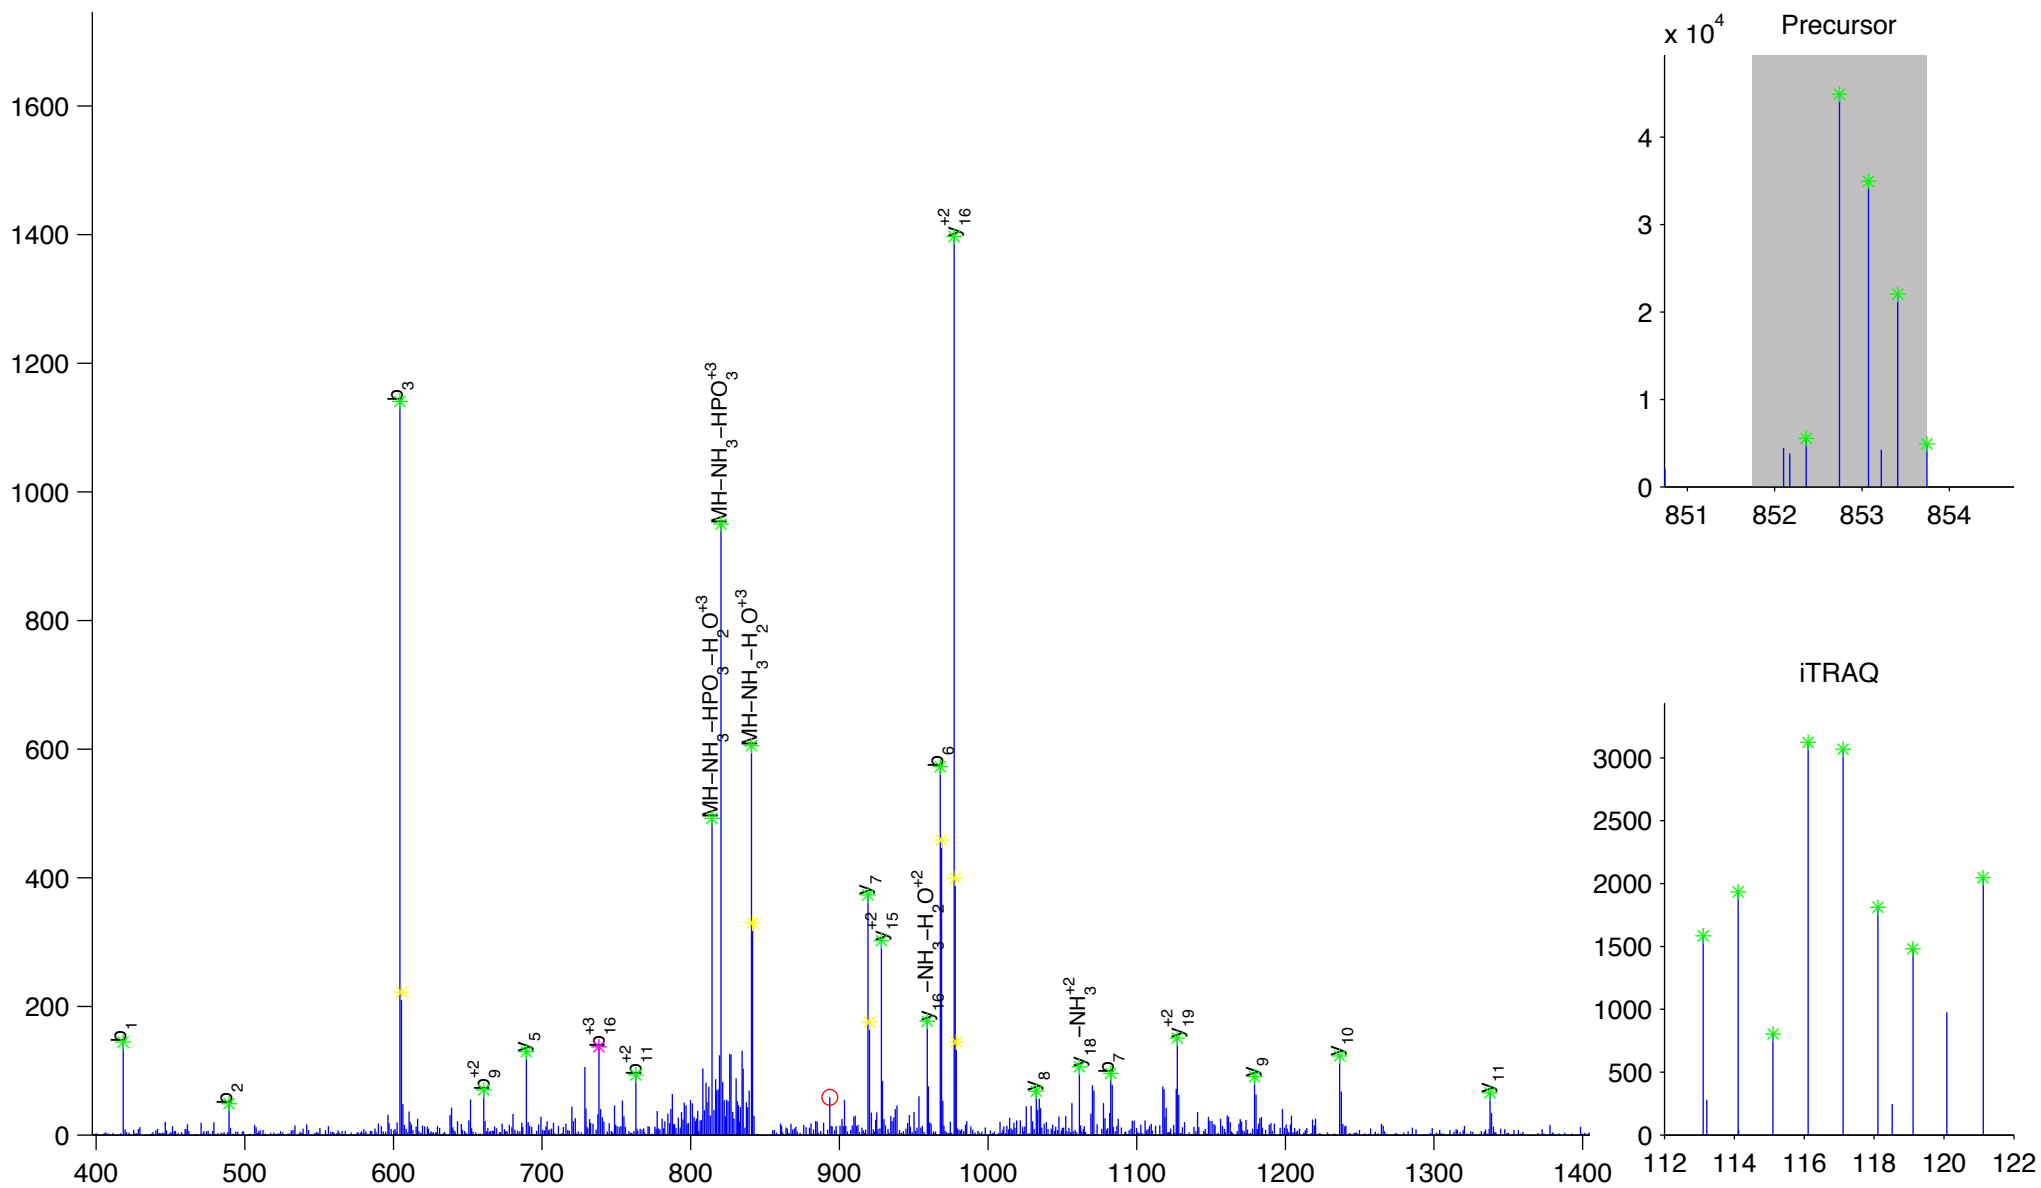

I [A] [D] [P] [E] [H] [D] [H] [T] [G] [F] [L] [t] [E] [Y] [V] [A] [T] [R]

mitogen activated protein kinase 3  
 Charge State: +3  
 Scan Number: 5727  
 File Name: 100611ptp1blivers\_nc\_basal.raw

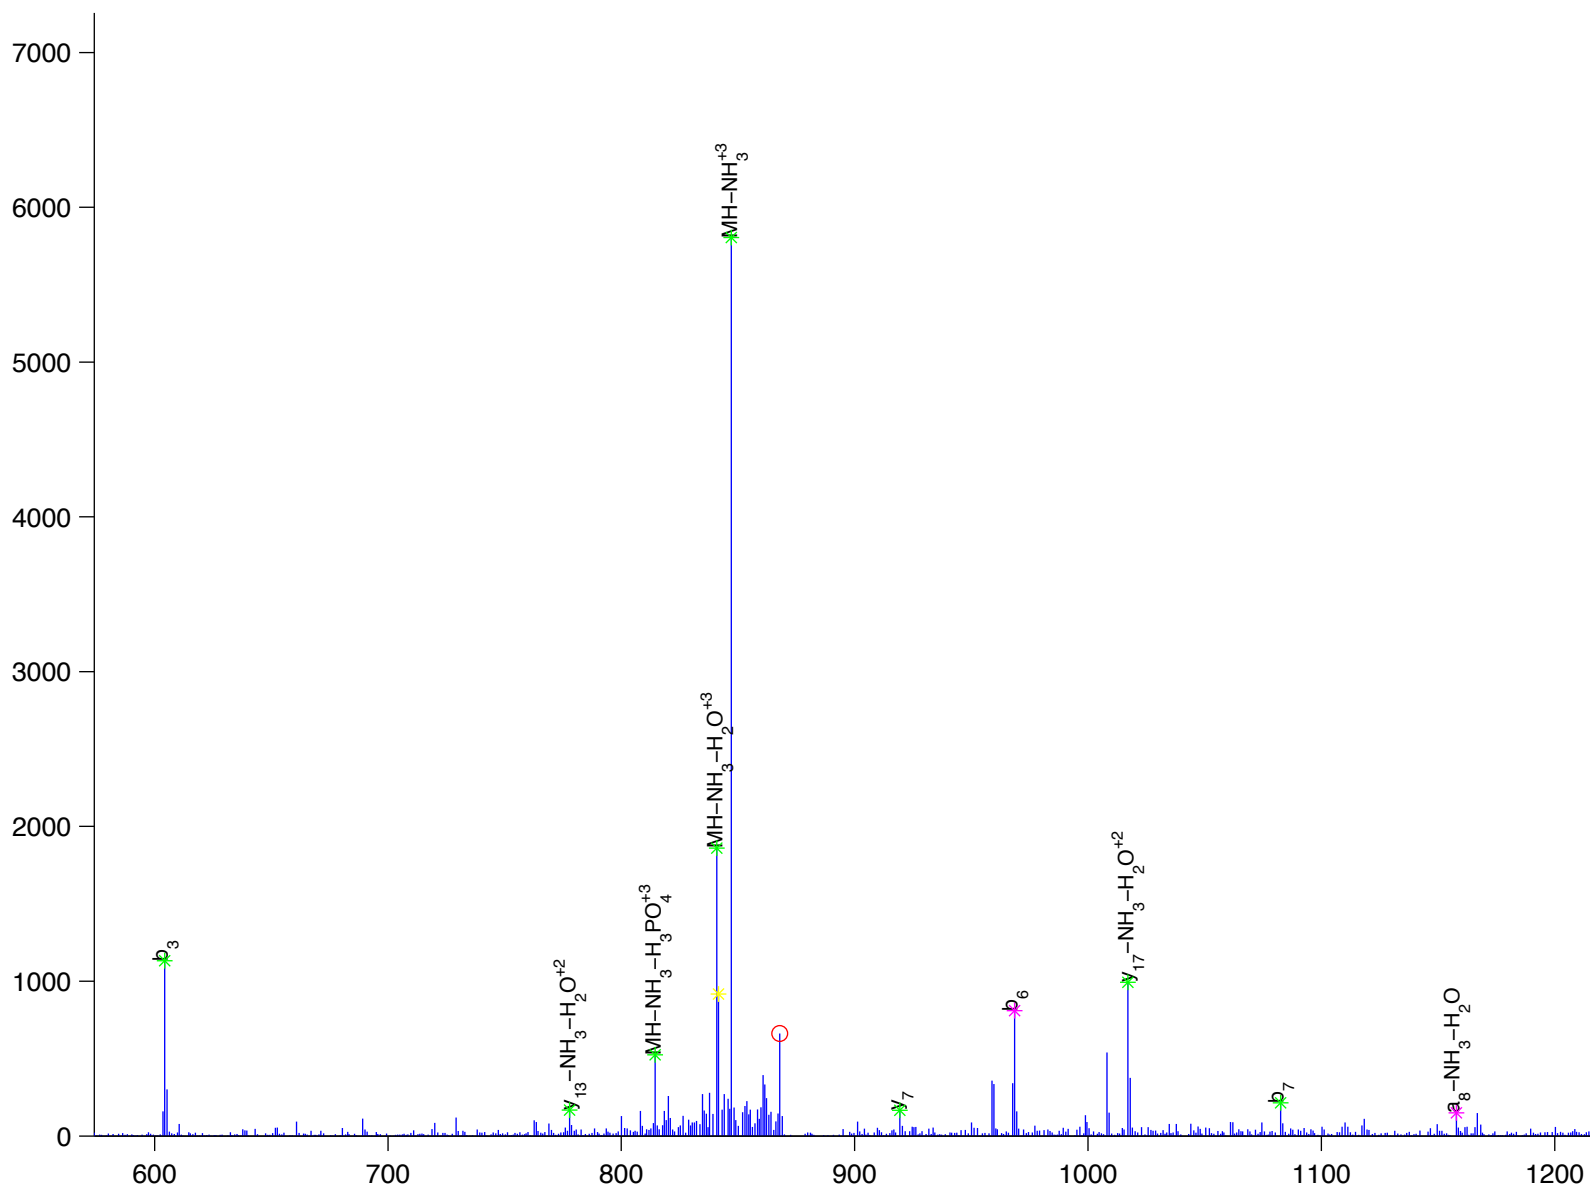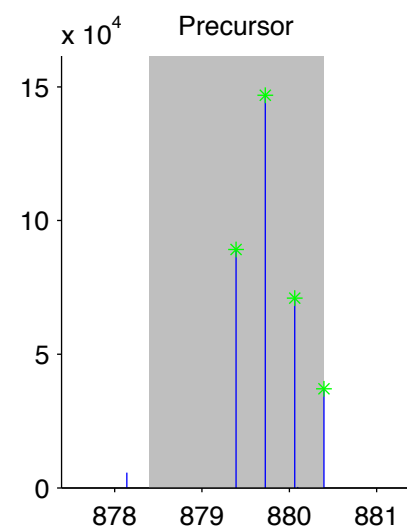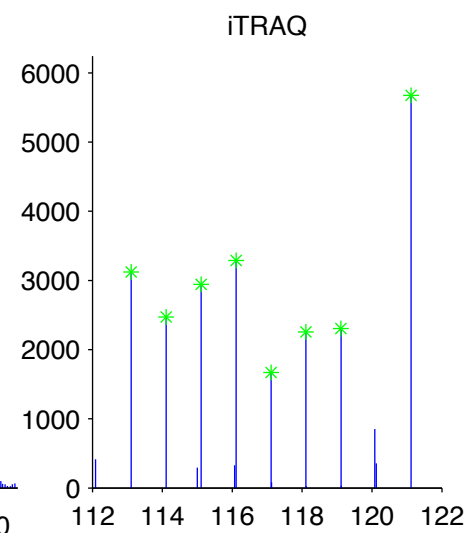

I [ A ] [ D ] [ P ] [ E ] [ H ] [ D ] [ H ] [ T ] [ G ] [ F ] [ L ] [ T ] [ E ] [ Y ] [ V ] [ A ] [ t ] [ R ]

mitogen activated protein kinase 3  
 Charge State: +3  
 Scan Number: 5727  
 File Name: 100611ptp1blivers\_nc\_basal.raw

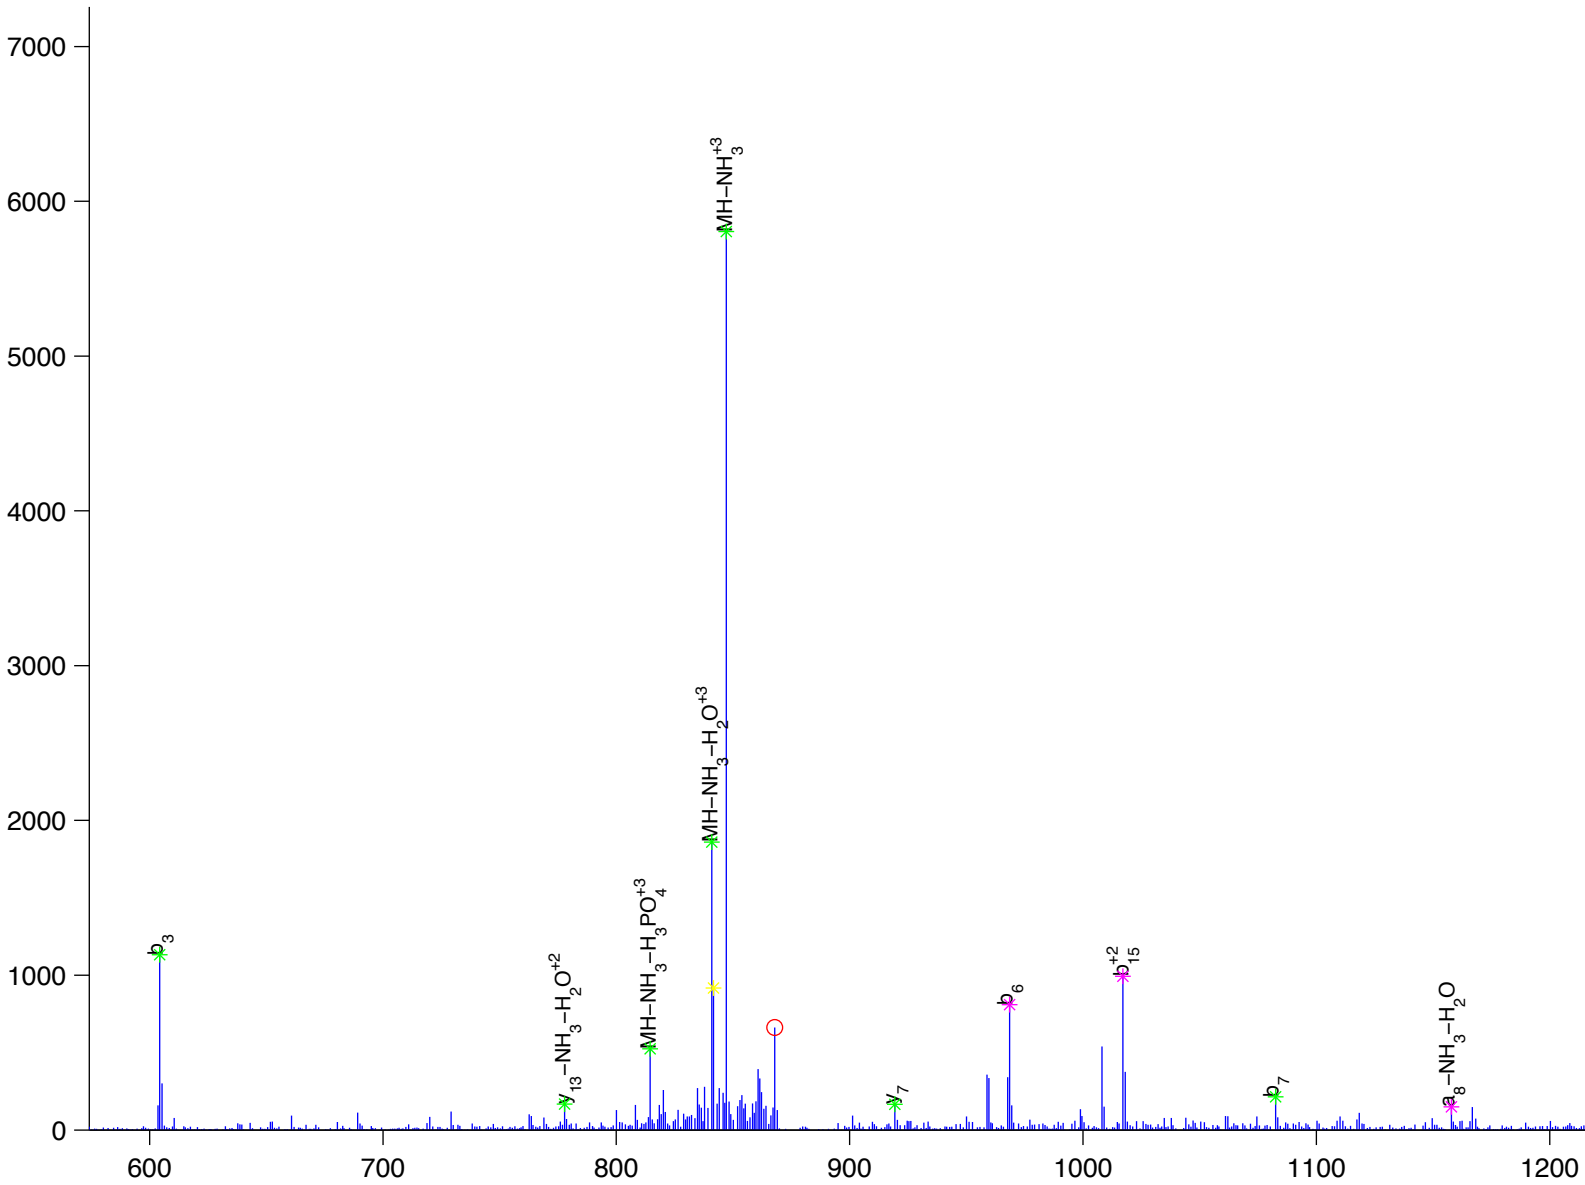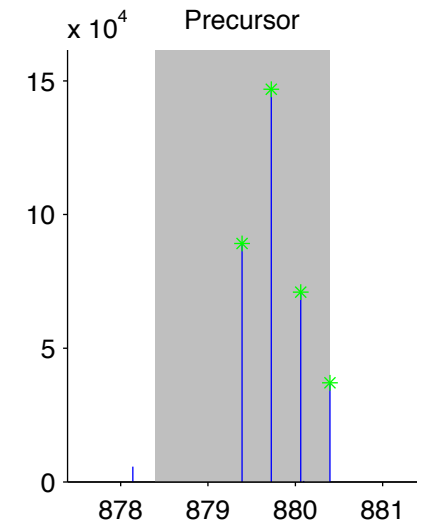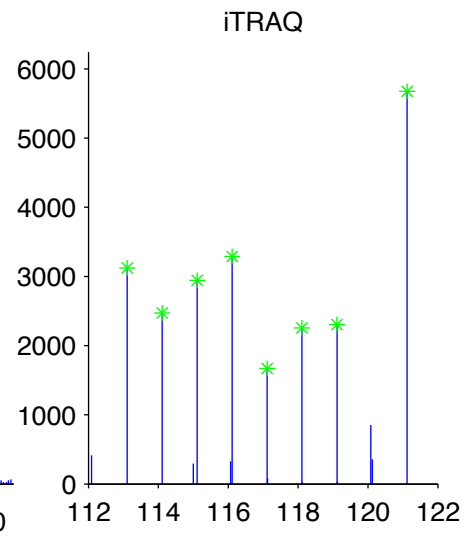

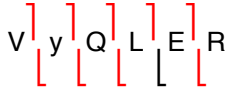

myeloid/lymphoid or mixed lineage–leukemia translocation to 4 homolog isoform 1

Charge State: +2

Scan Number: 5432

File Name: 0090807ptp1blivers\_M\_HFD2.raw

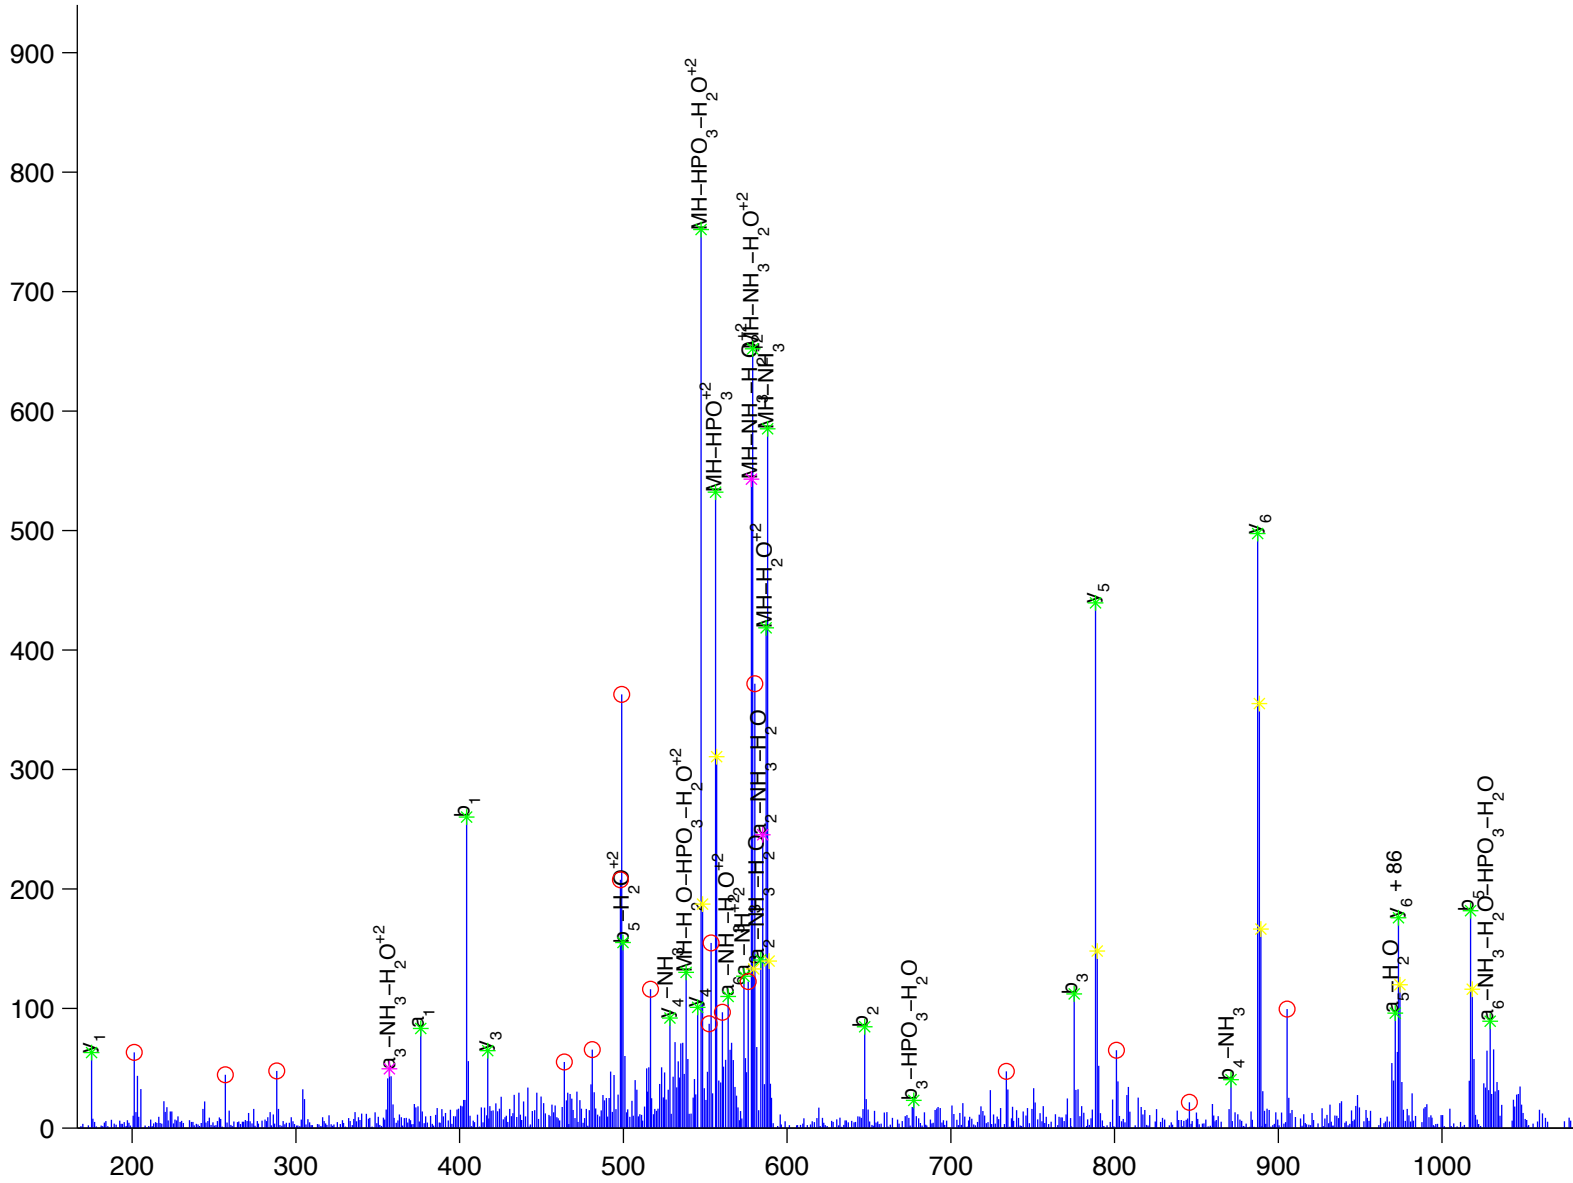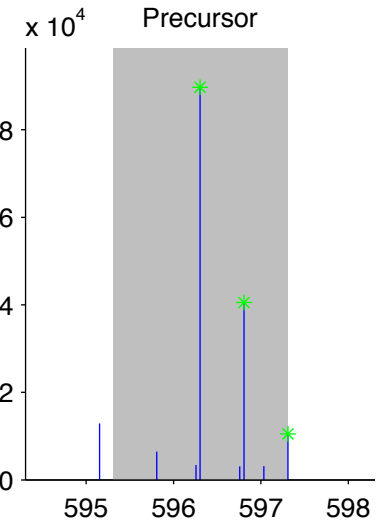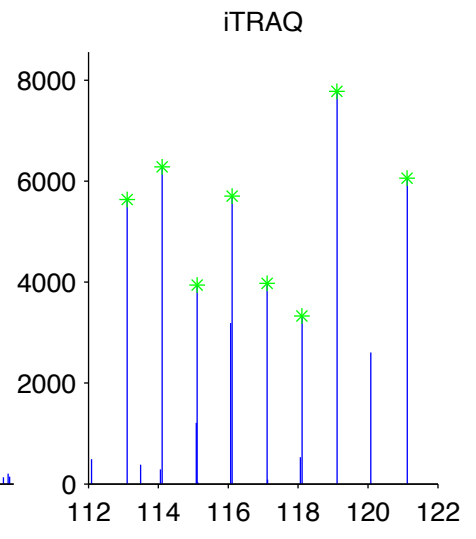

E [ y ] [ F ] [ T ] [ F ] [ P ] [ A ] [ S ] K

myeloid/lymphoid or mixed lineage–leukemia translocation to 4 homolog isoform 1

Charge State: +3

Scan Number: 6969

File Name: 090806ptp1blivers\_M\_NC2.raw

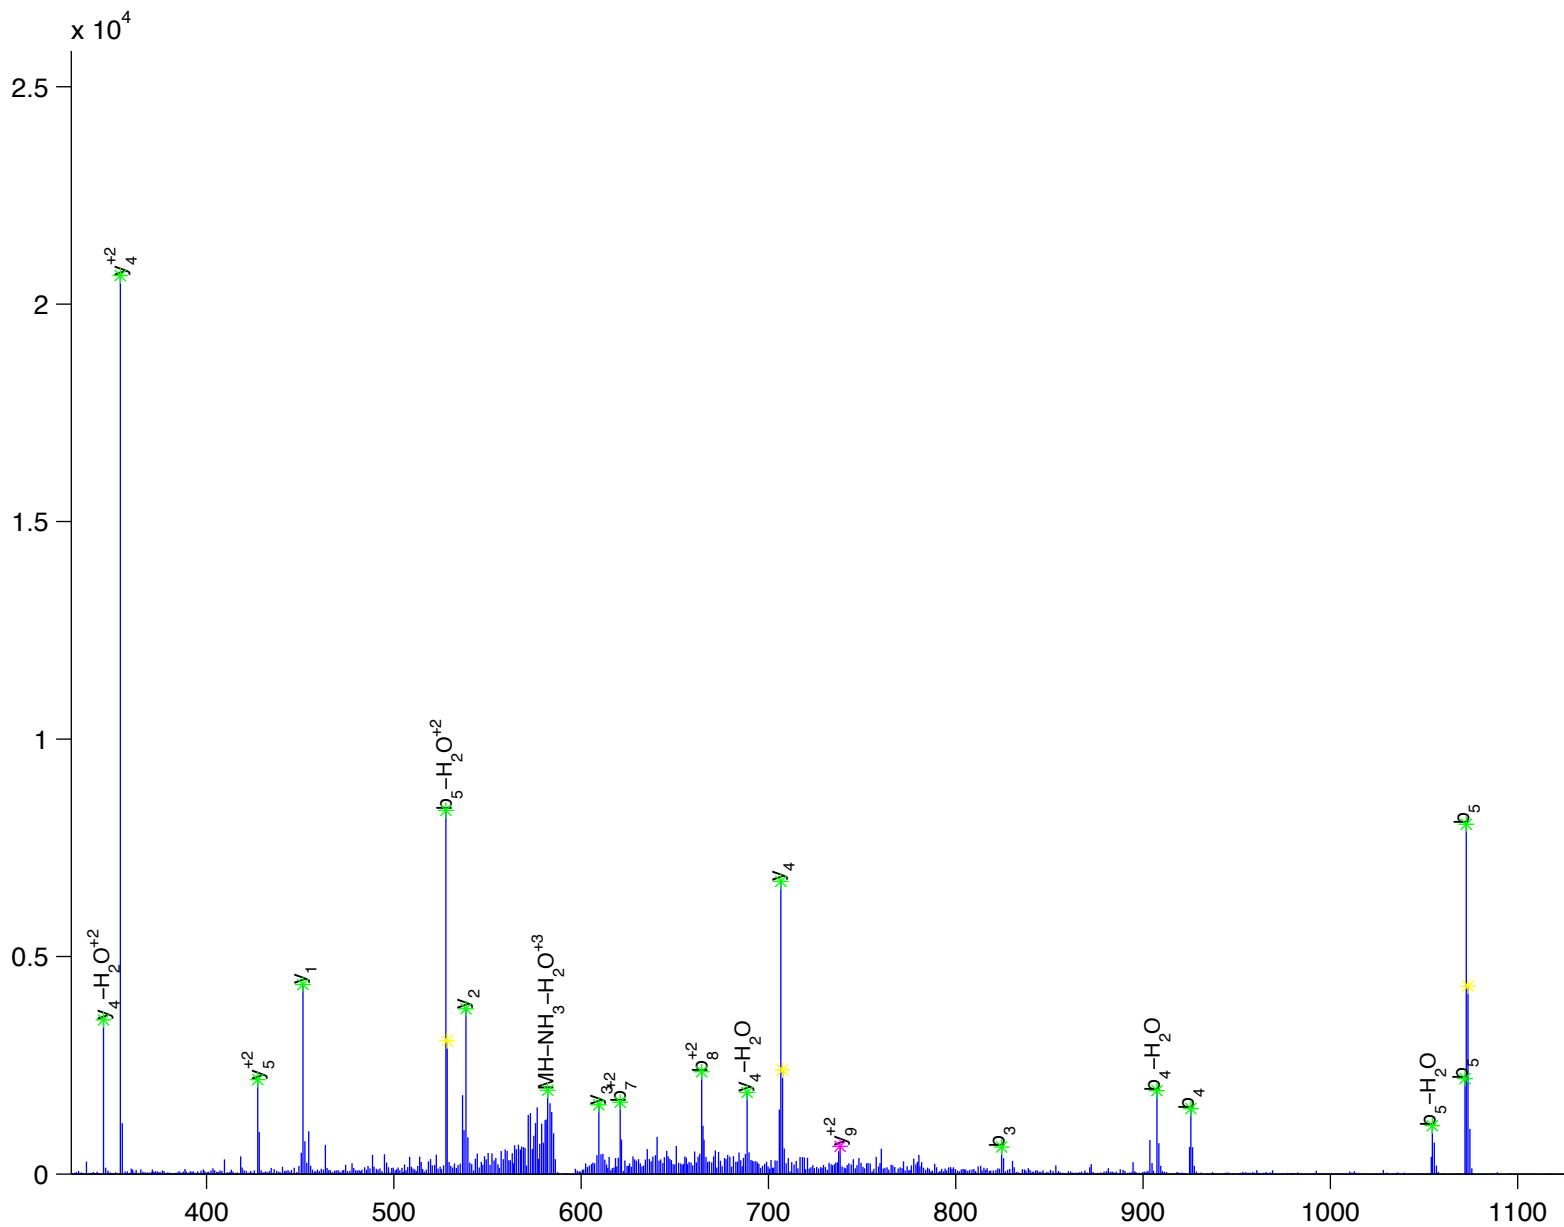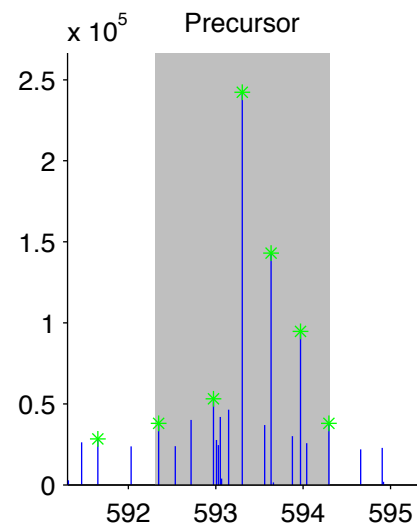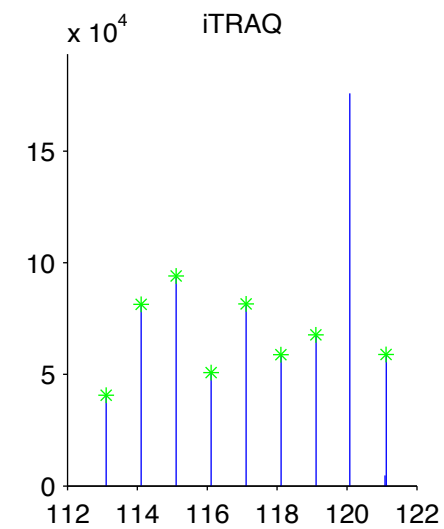



G  
I  
V  
V  
y  
T  
G  
D  
R

Na<sup>+</sup>/K<sup>+</sup> -ATPase alpha 1 subunit

Charge State: +2

Scan Number: 4771

File Name: 091130ptp1blivers\_hfd\_basal2.raw

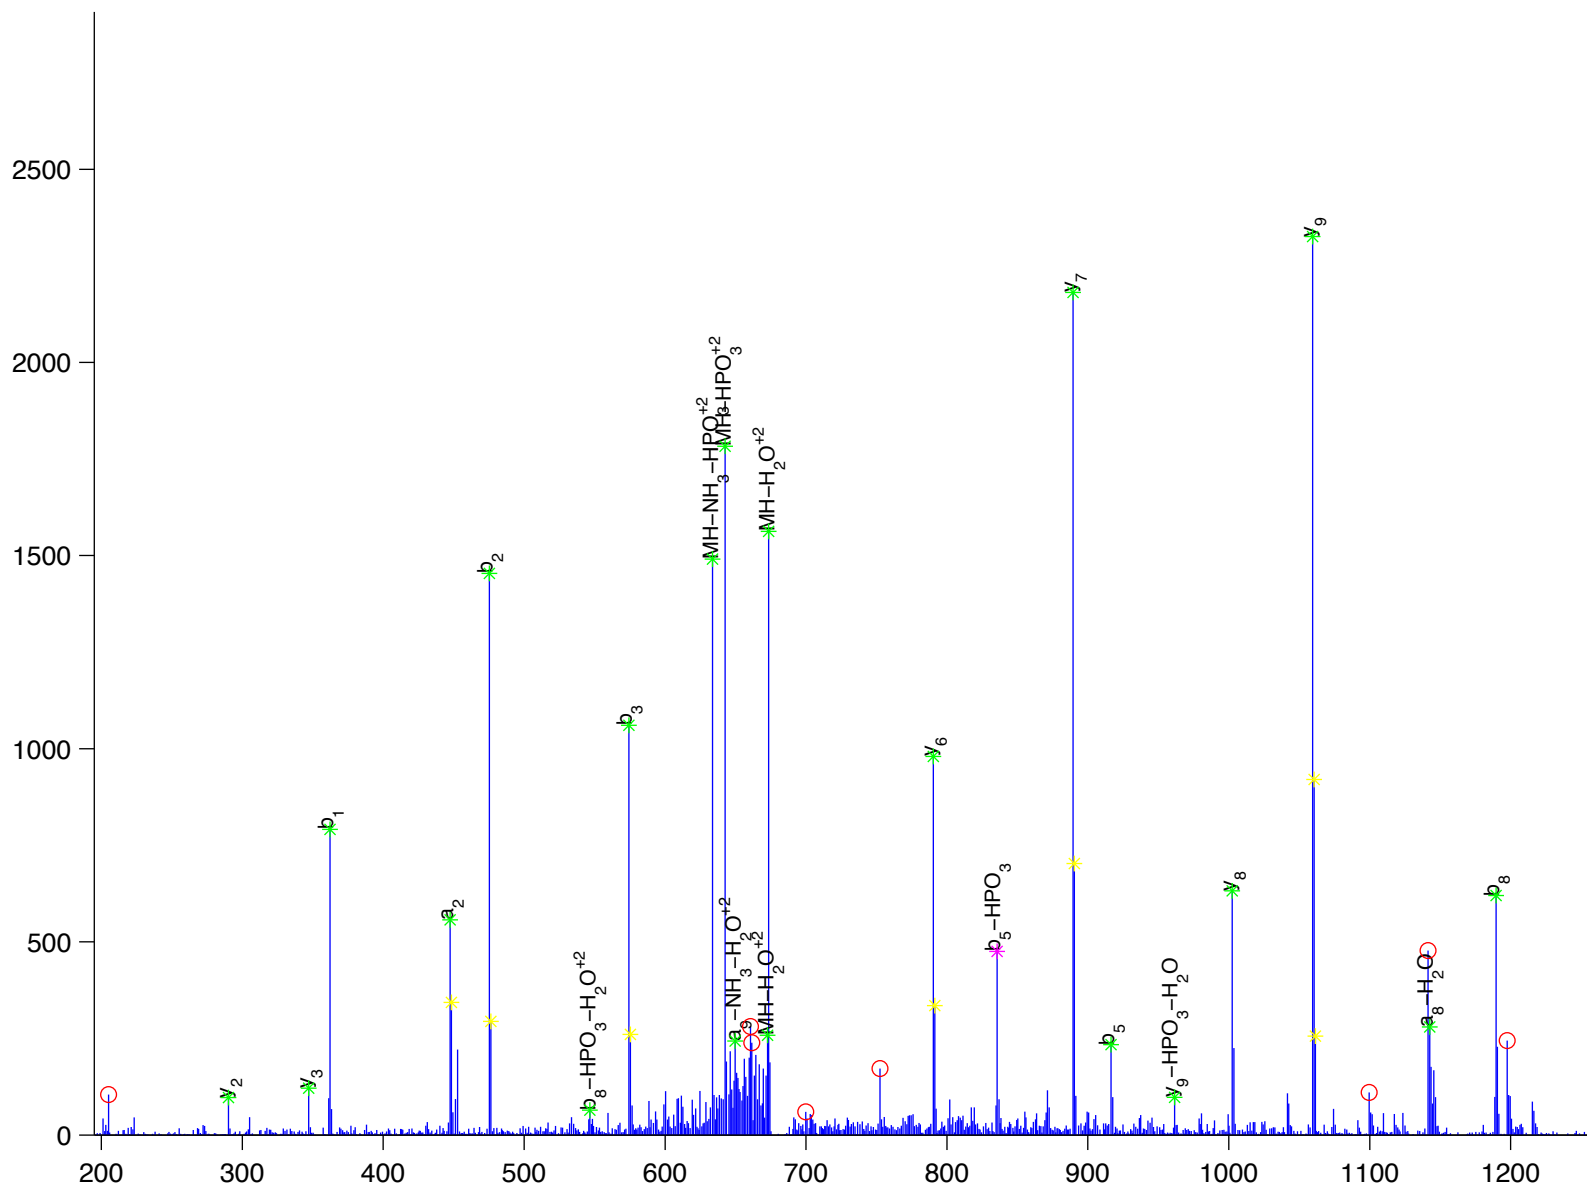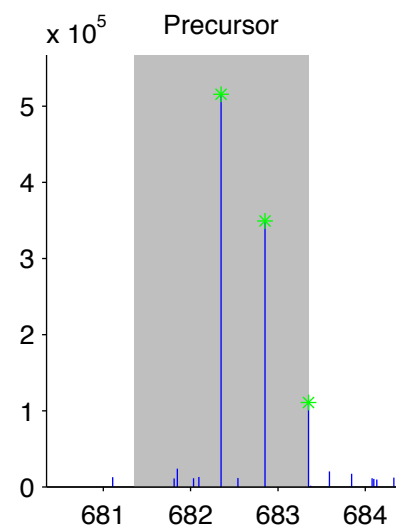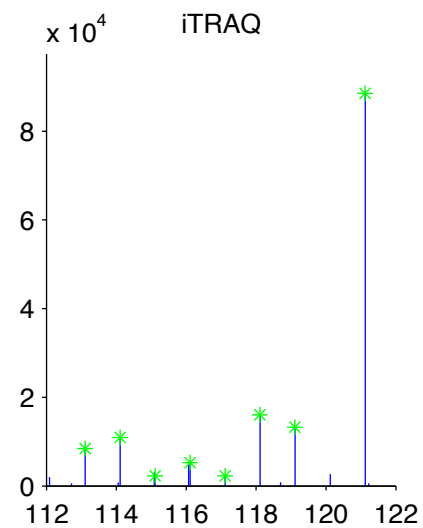

L [ y ] D [ L ] N [ M ] P [ A ] F [ V ] K

non-catalytic region of tyrosine kinase adaptor protein 1

Charge State: +3

Scan Number: 9342

File Name: 090806ptp1blivers\_M\_NC2.raw

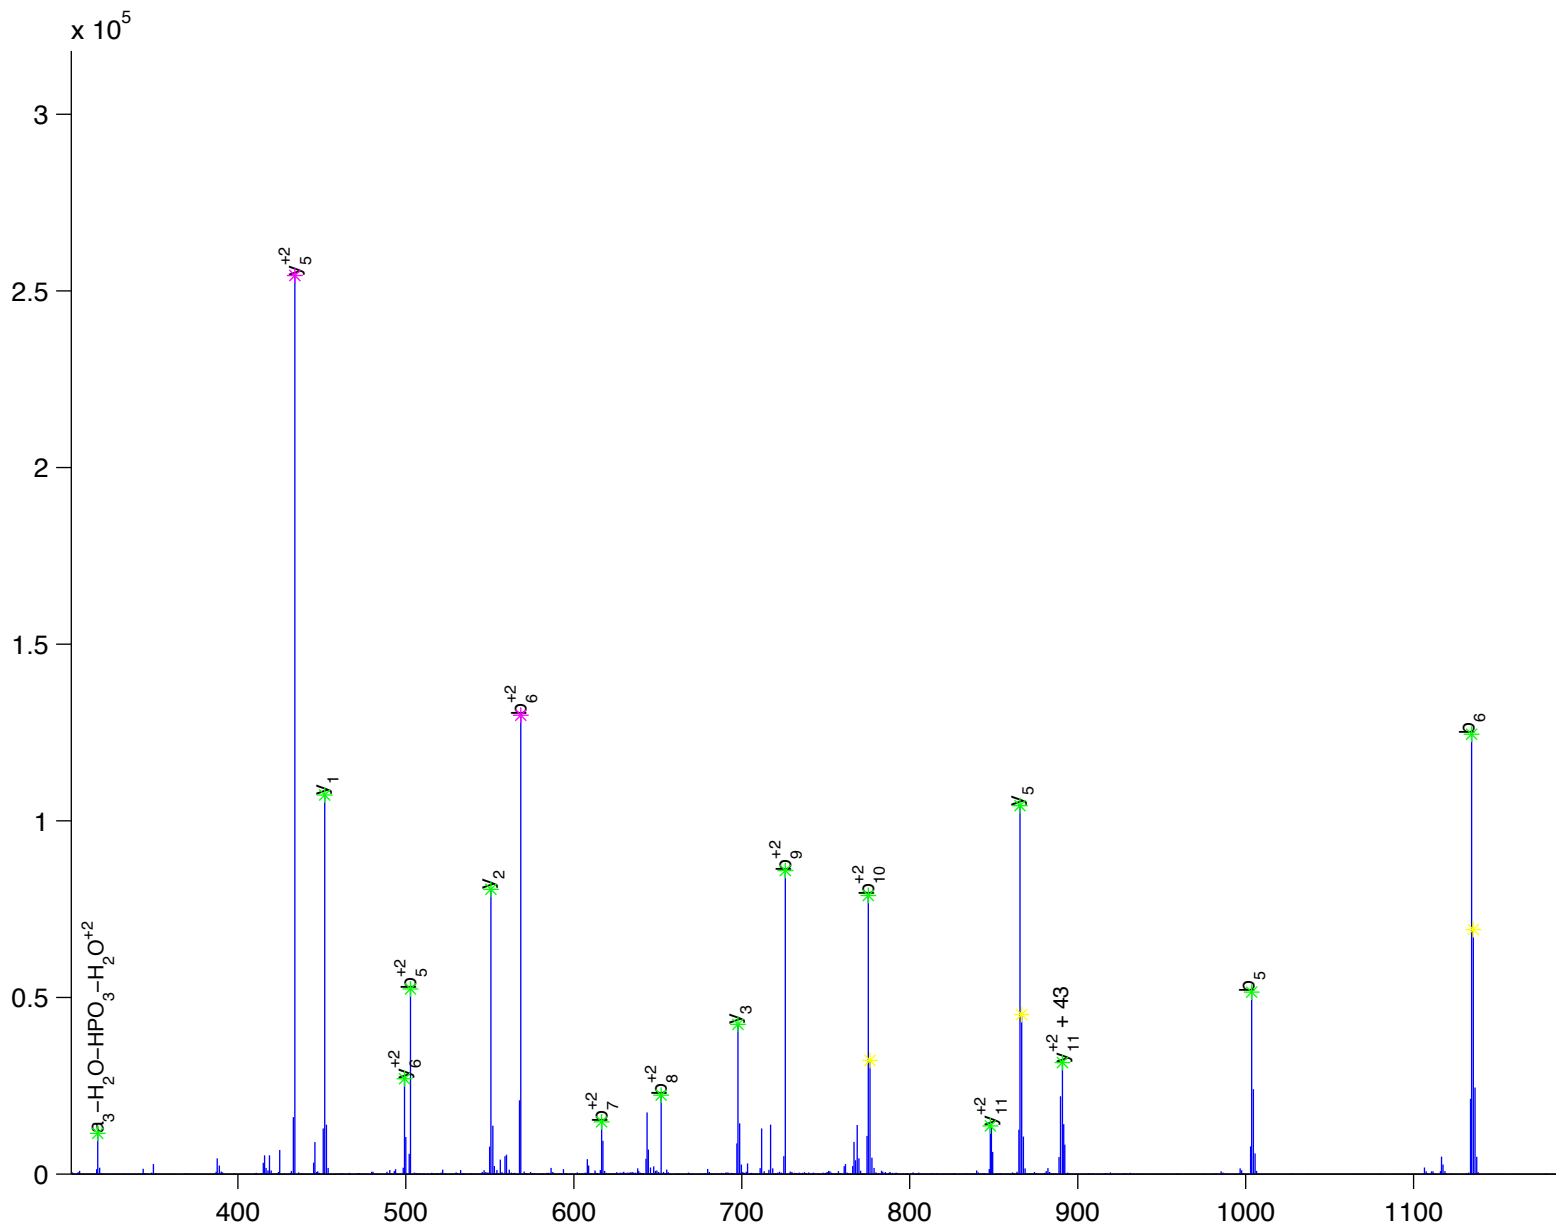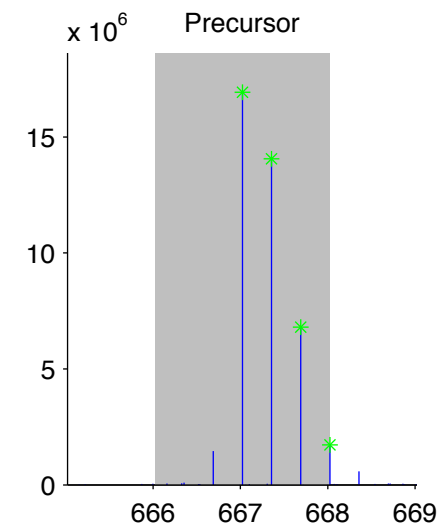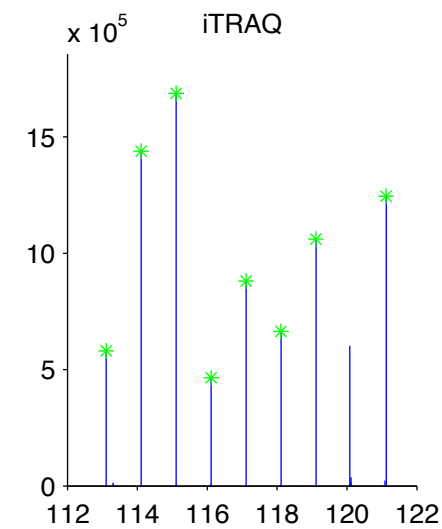

K T E Q G P P S S E y I F E R

ornithine aminotransferase

Charge State: +3

Scan Number: 5517

File Name: 100908ptp1blivers\_ncHFD3\_basal.raw

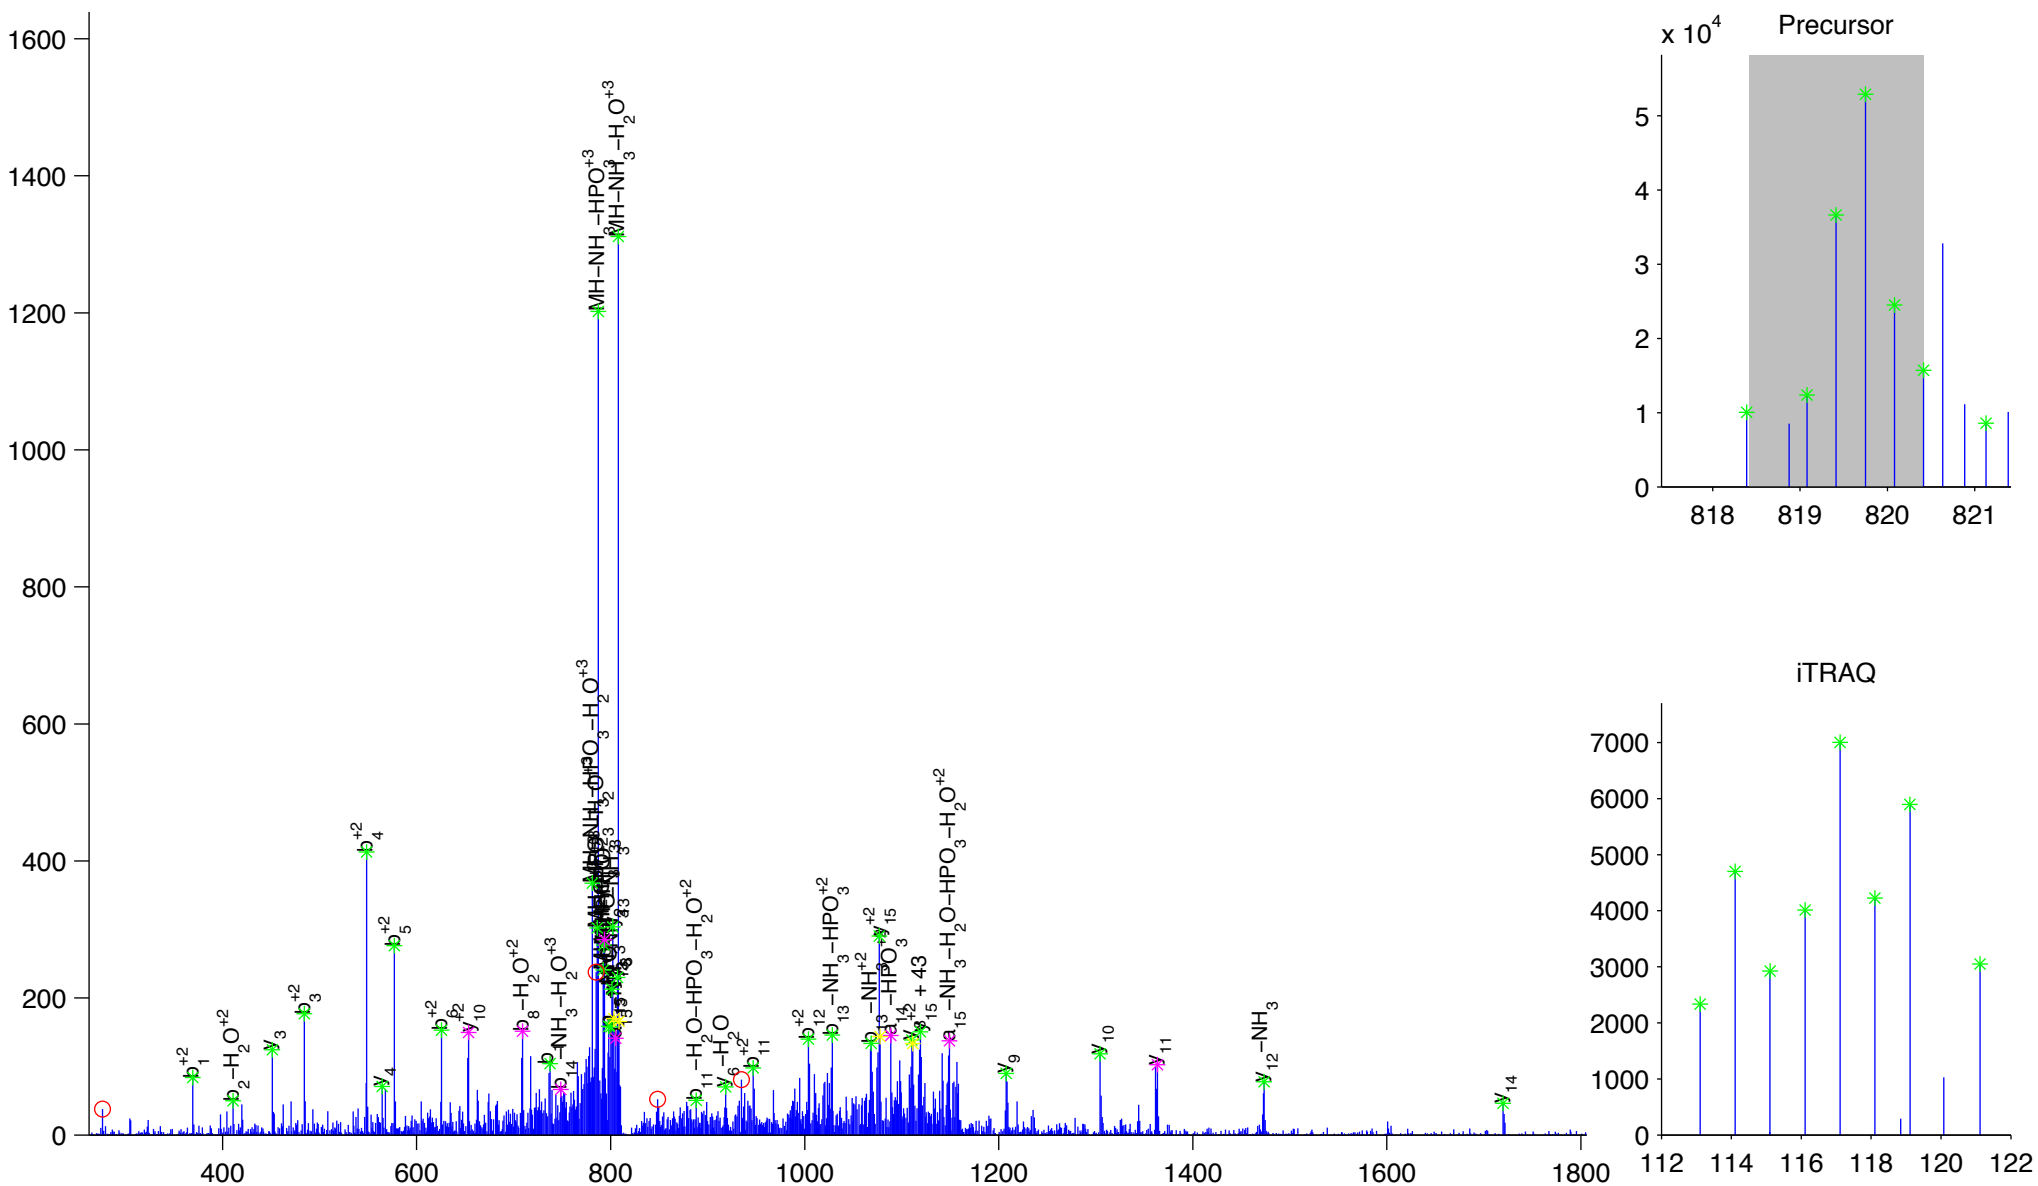

K[P]E[E]V[D]D[E]V[F]y[S]P]R

ornithine transcarbamylase

Charge State: +

Scan Number: 5268

File Name: 091130ptp1blivers\_hfd\_basal2.raw

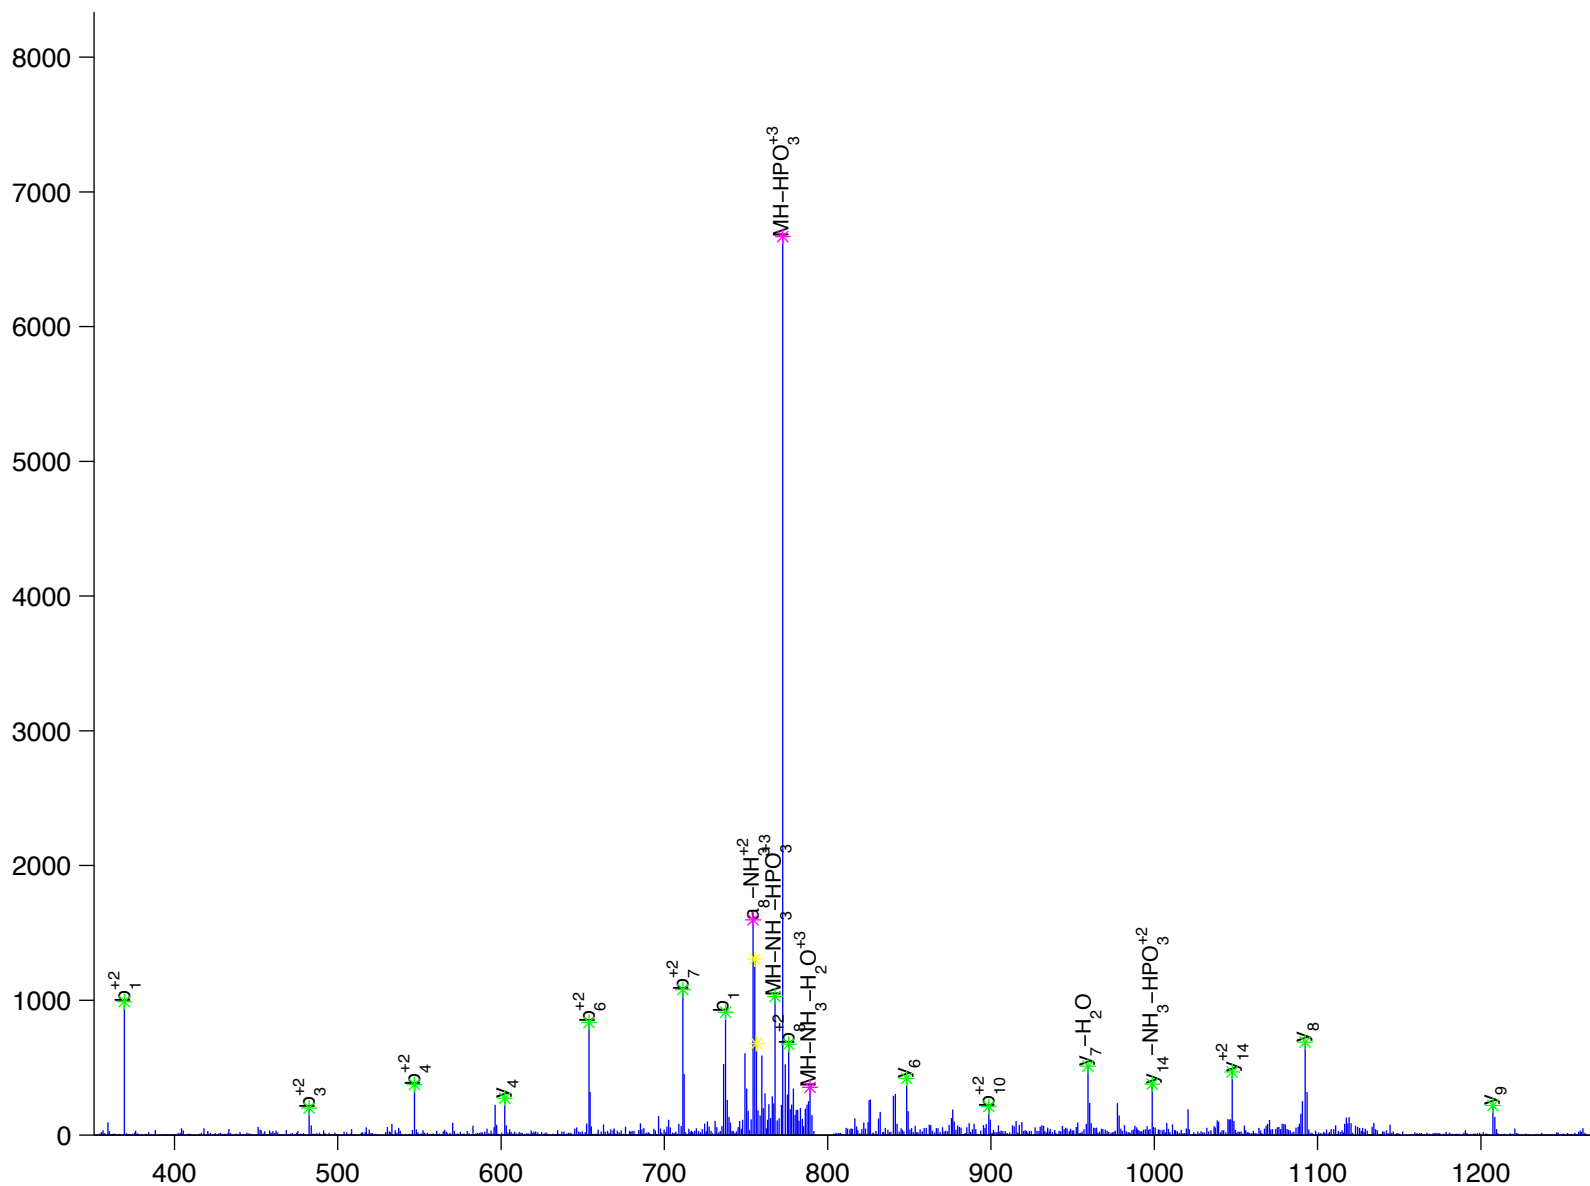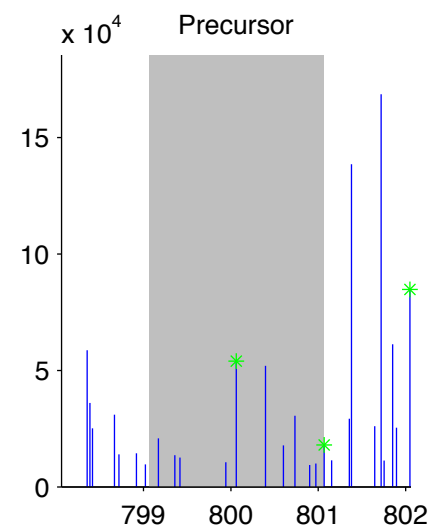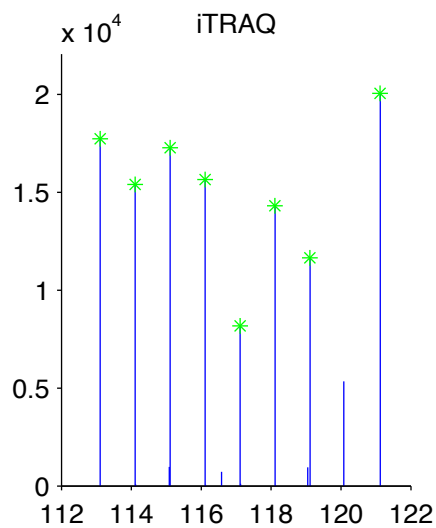

E [ R ] D [ y ] A [ E ] I [ Q ] D [ F ] H [ R ]

partitioning-defective protein 3 homolog isoform 3

Charge State: +3

Scan Number: 4227

File Name: 091130ptp1blivers\_hfd\_basal2.raw

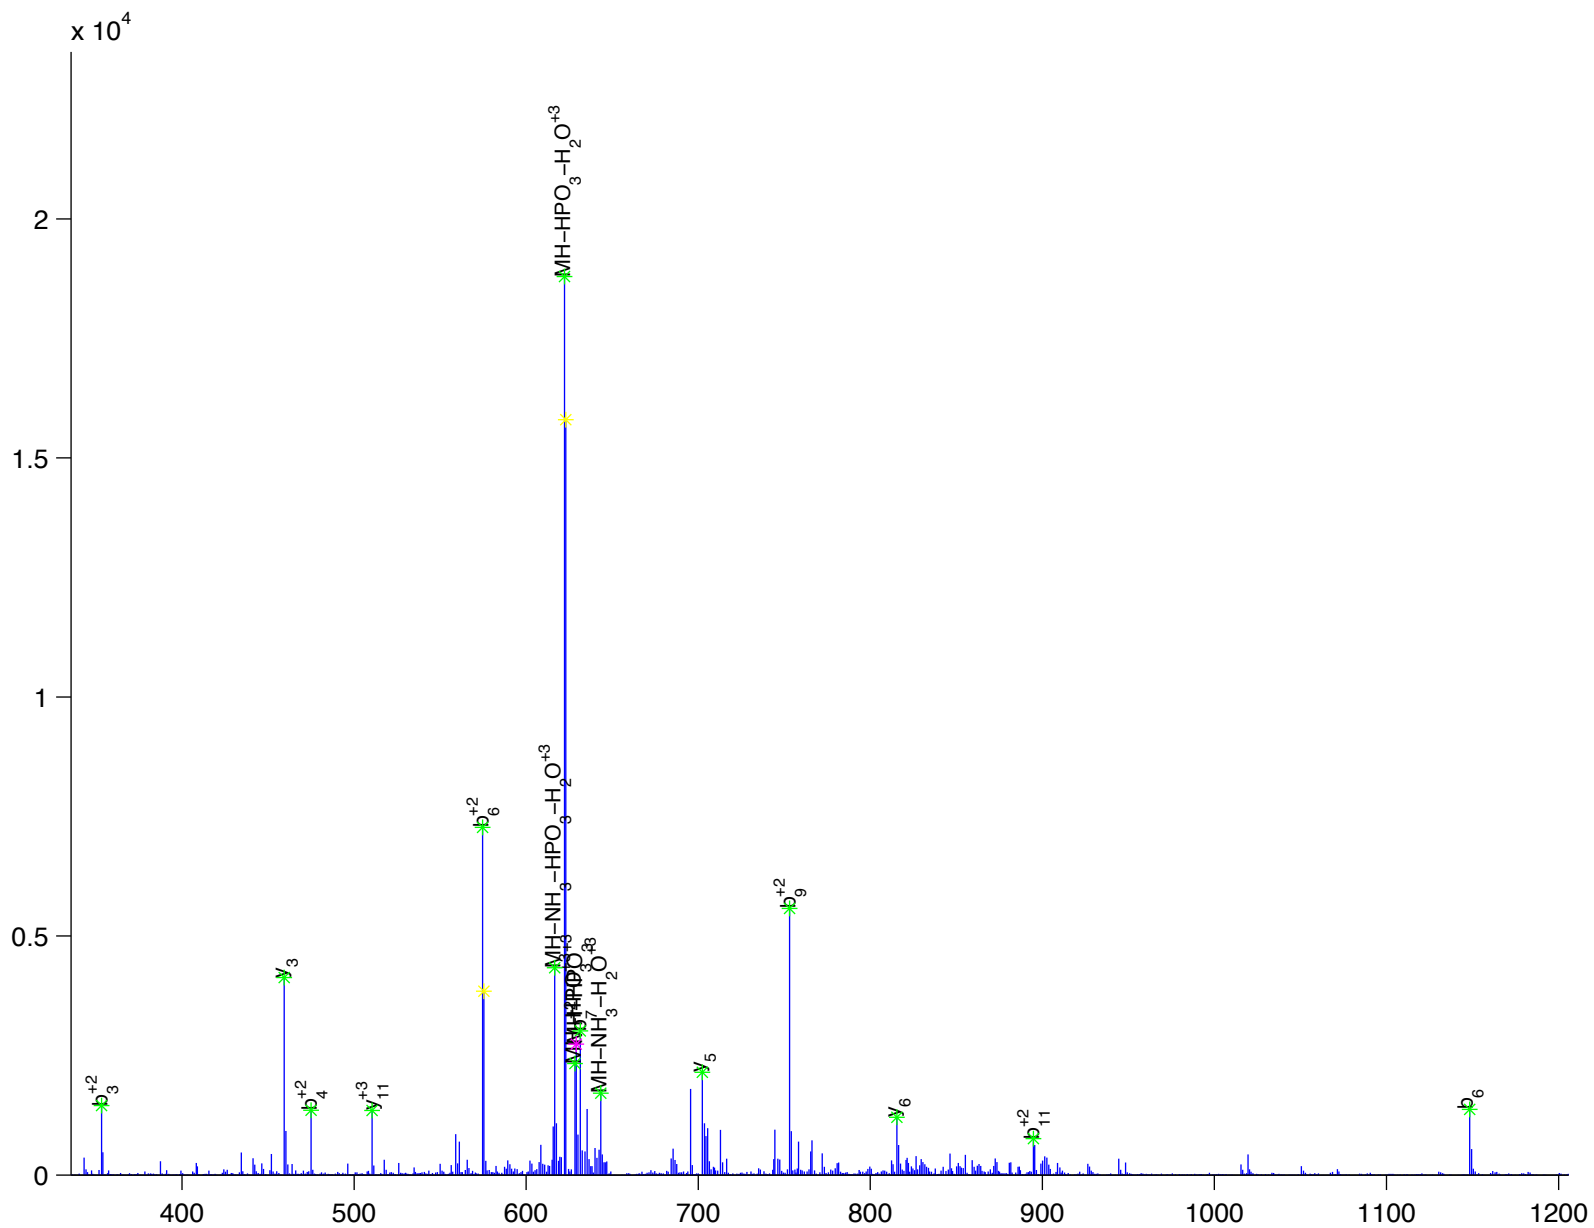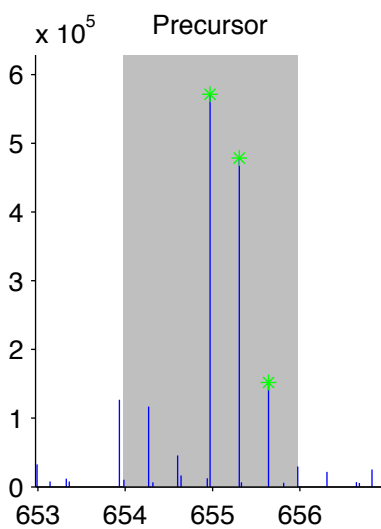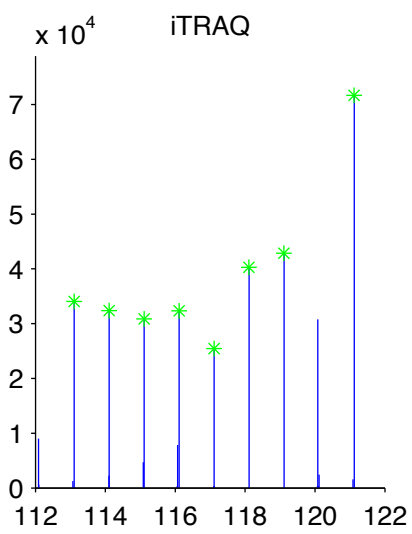

E [G] [H] [L] [M] [D] [T] [L] y [A] [Q] [V] K

partitioning-defective protein 3 homolog isoform 3

Charge State: +3

Scan Number: 5884

File Name: 091130ptp1blivers\_hfd\_basal2.raw

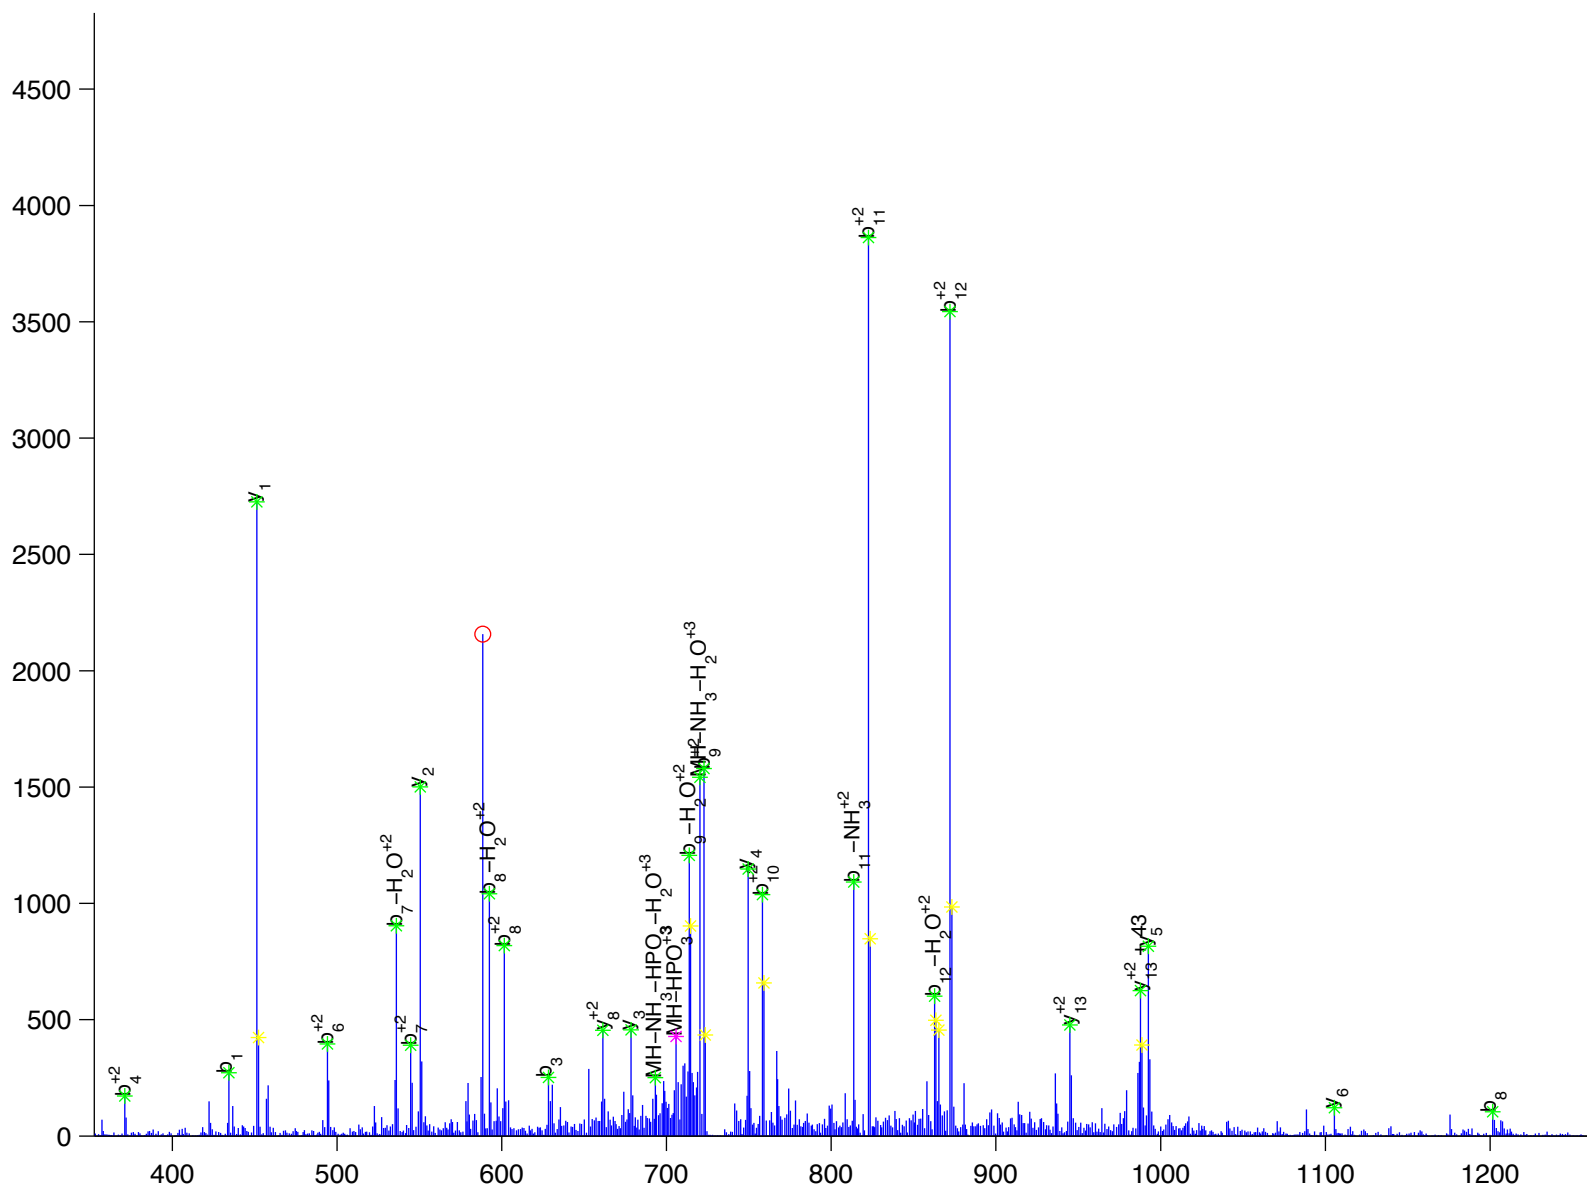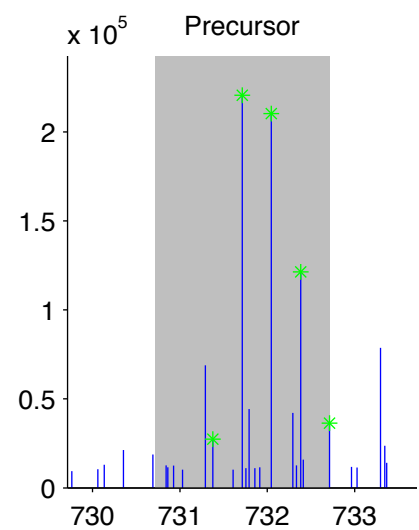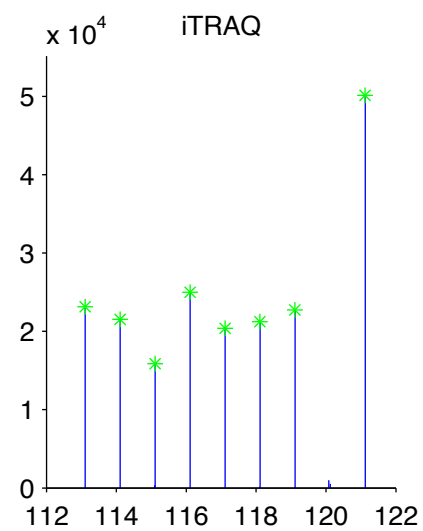

A [G] [E] [E] [E] [H] [V] [y] [S] [F] [P] [N] K

paxillin isoform alpha

Charge State: +3

Scan Number: 3672

File Name: 100905ptp1blivers\_ncHFD\_basal.raw

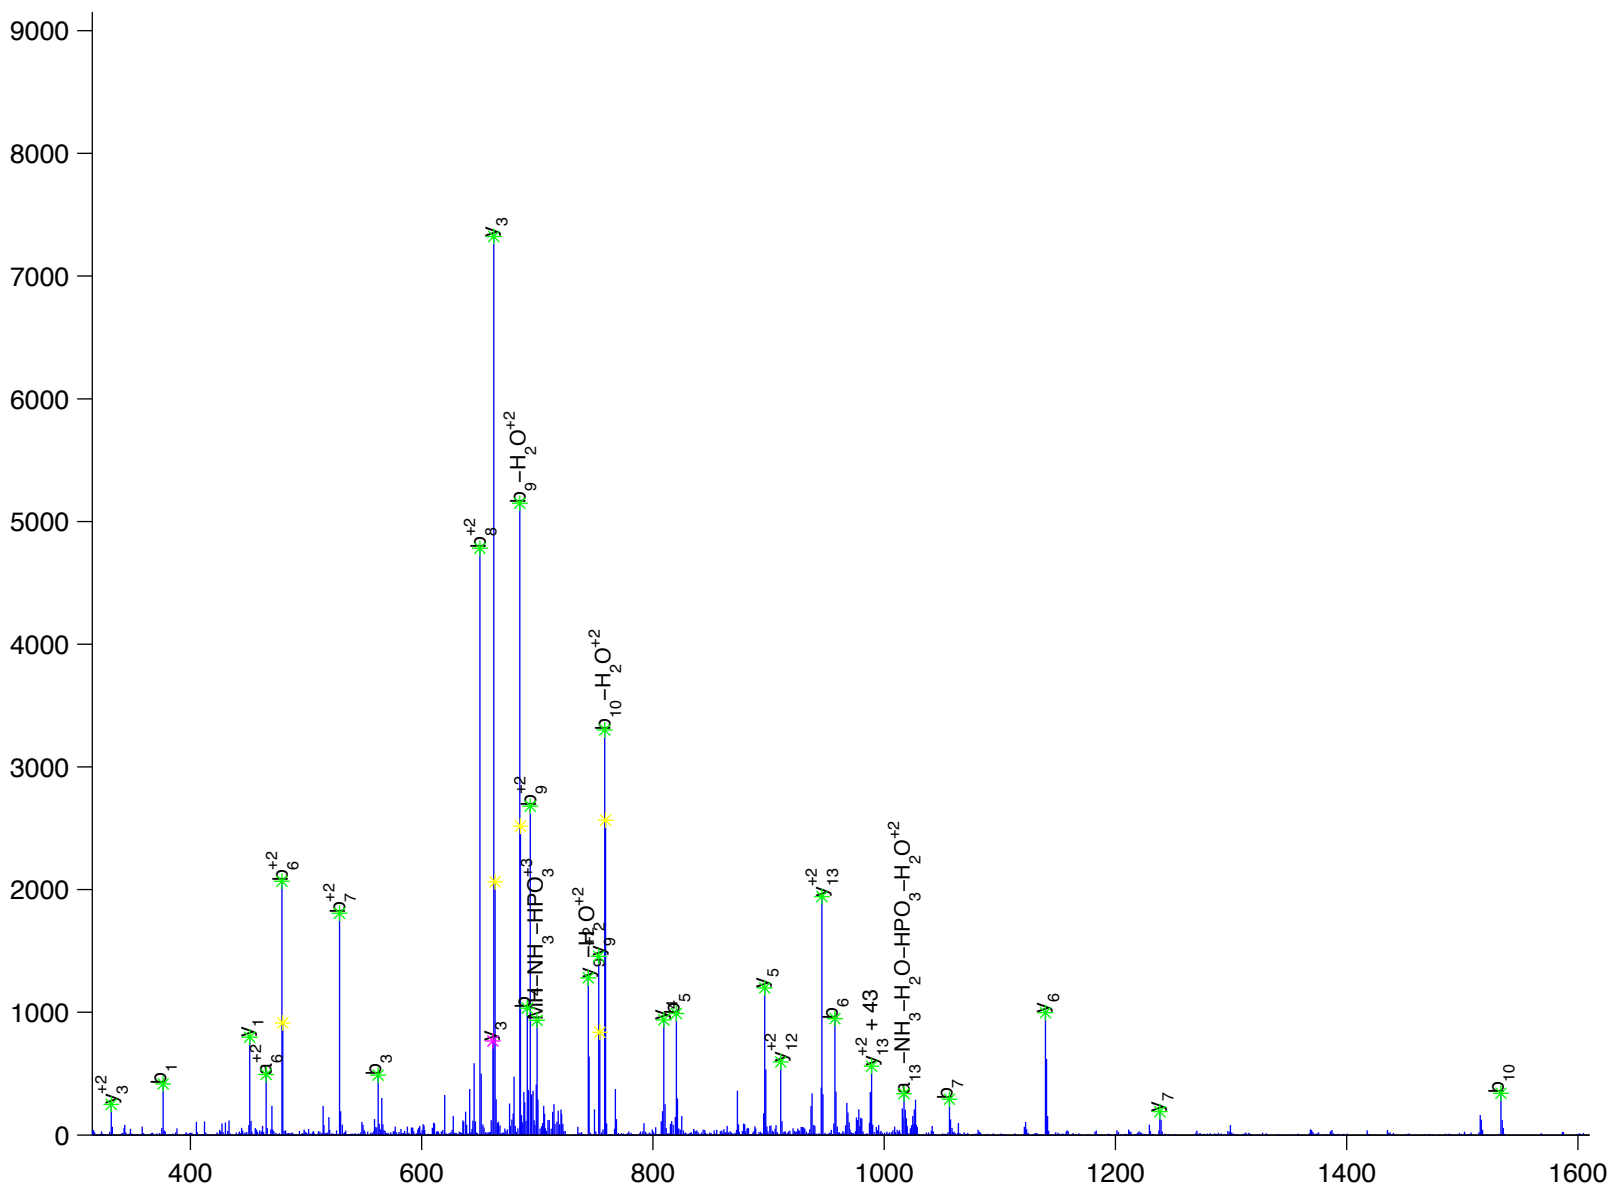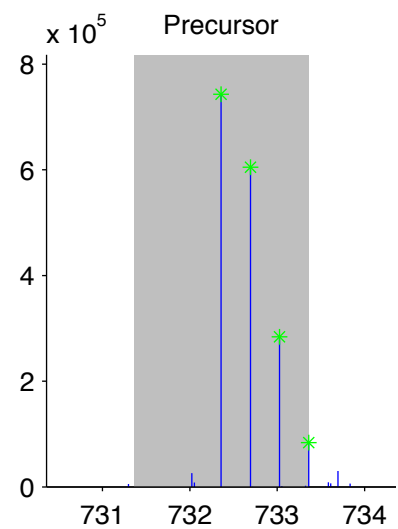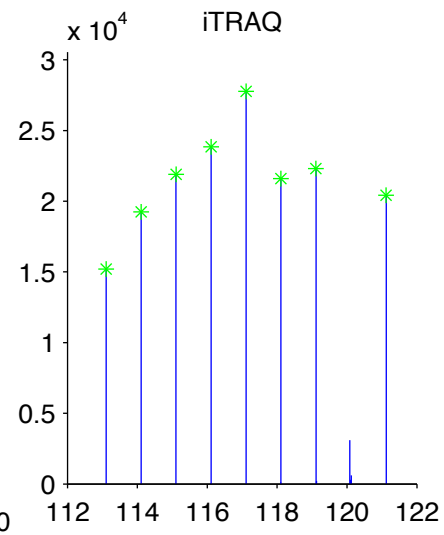

D I N A y N G E T P T E K

peroxiredoxin 6

Charge State: +3

Scan Number: 3319

File Name: 100905ptp1blivers\_ncHFD\_basal.raw

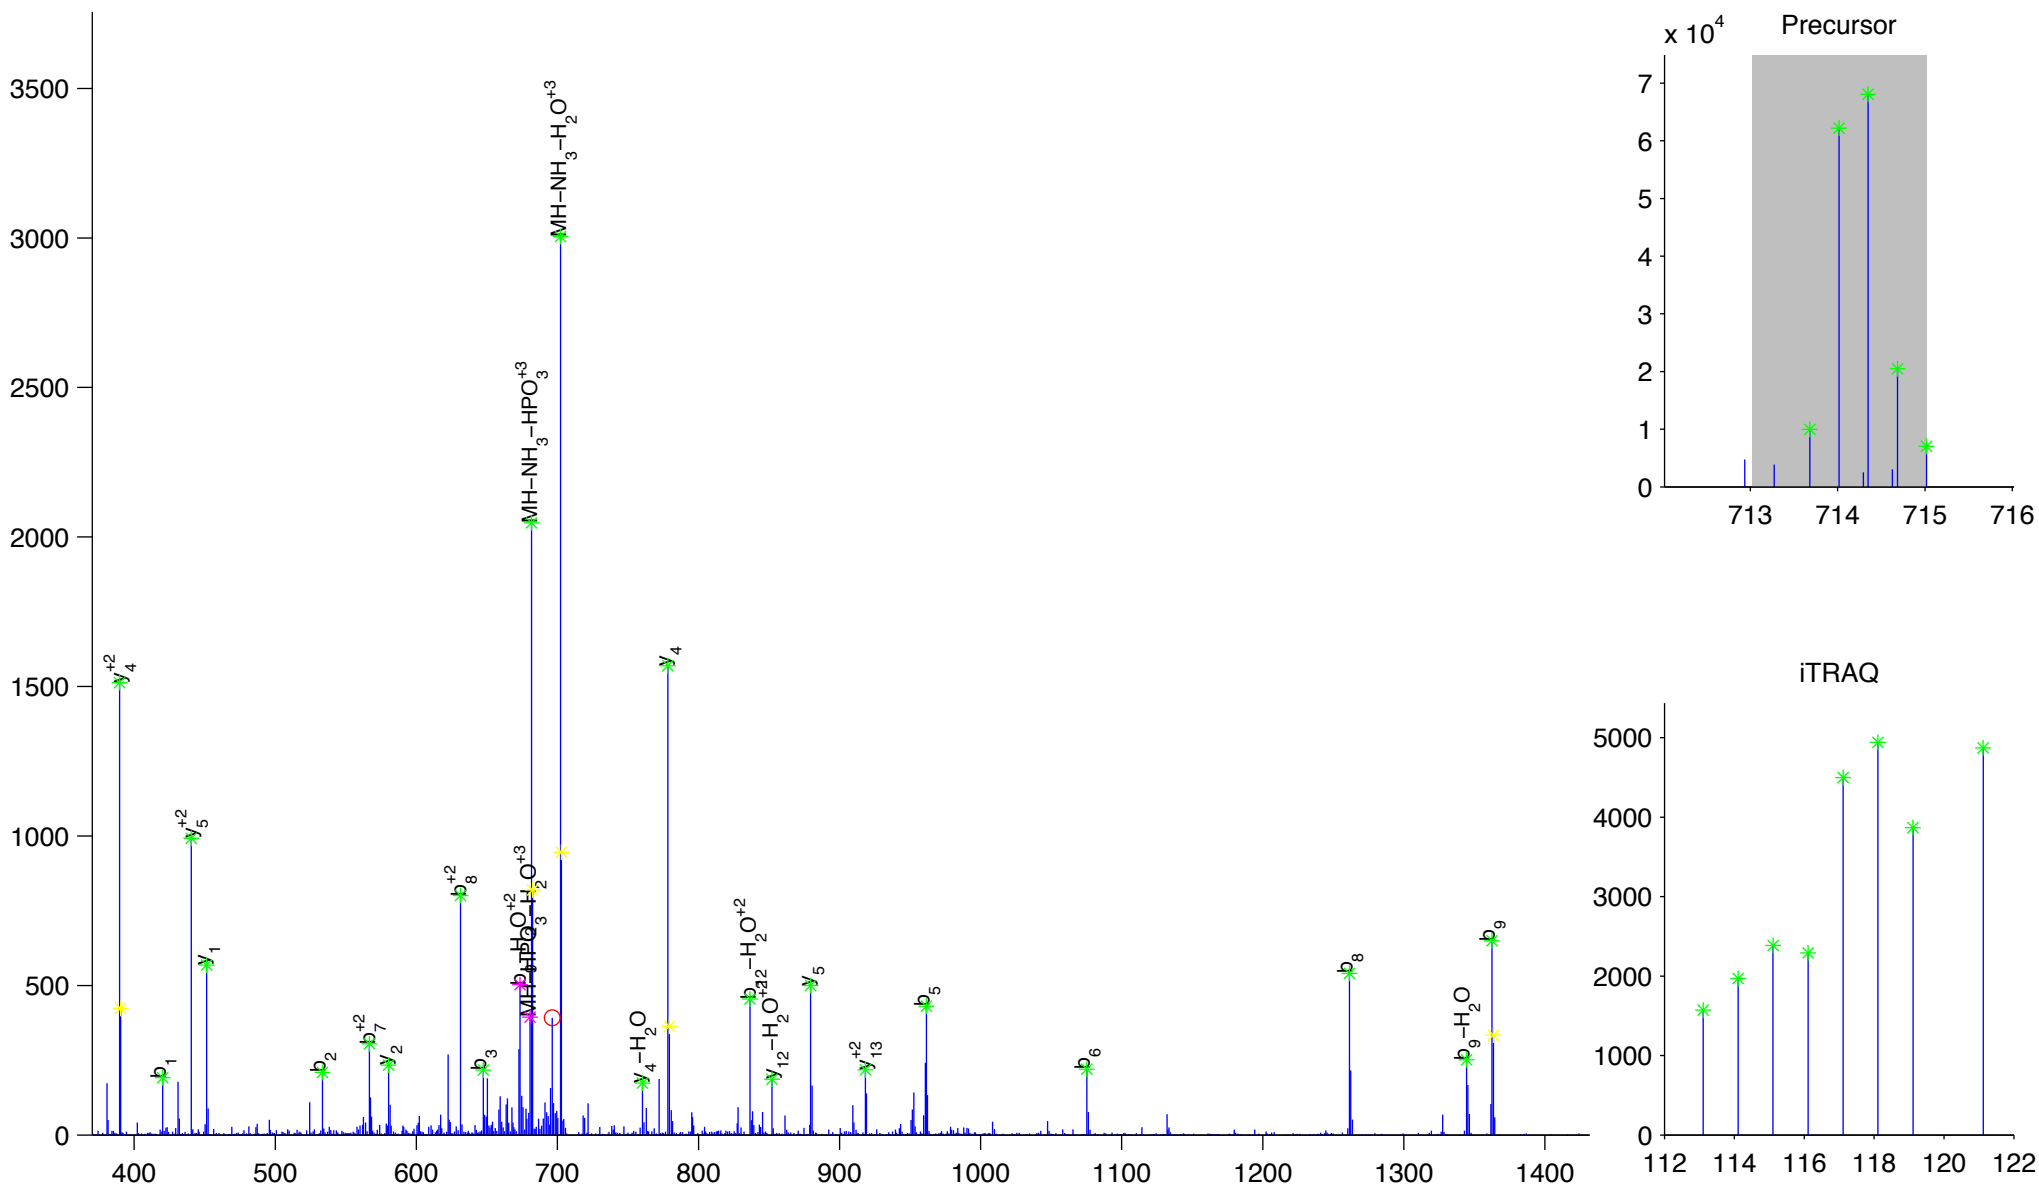



Q [ F ] A [ D ] I [ A ] y [ N ] Y [ R ]

phenylalanine hydroxylase

Charge State: +2

Scan Number: 4923

File Name: 090728ptp1blivers\_M\_NC\_ins\_e.raw

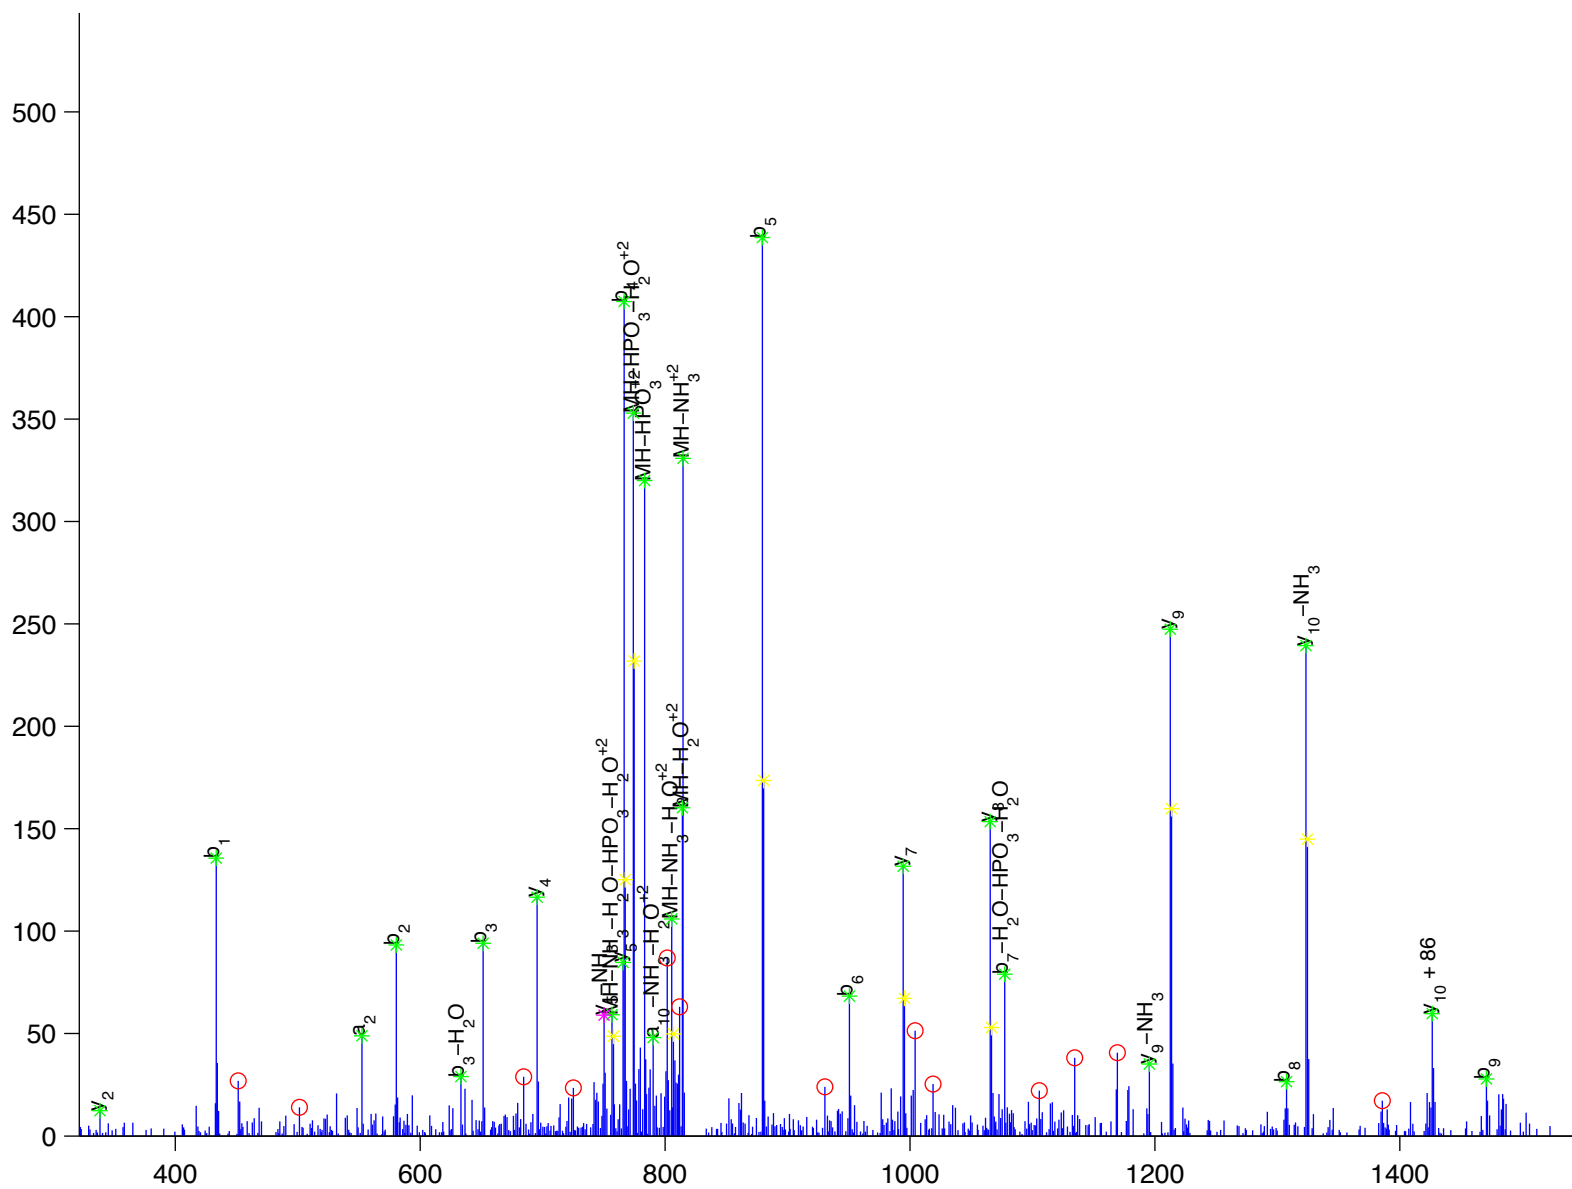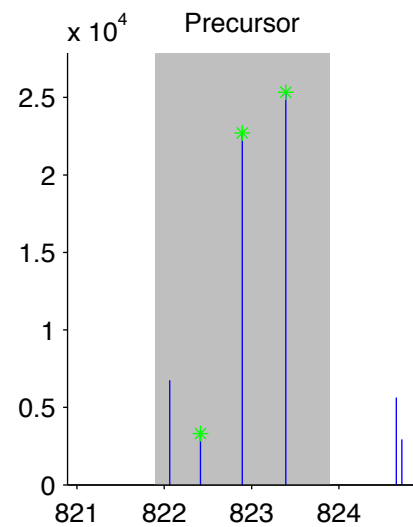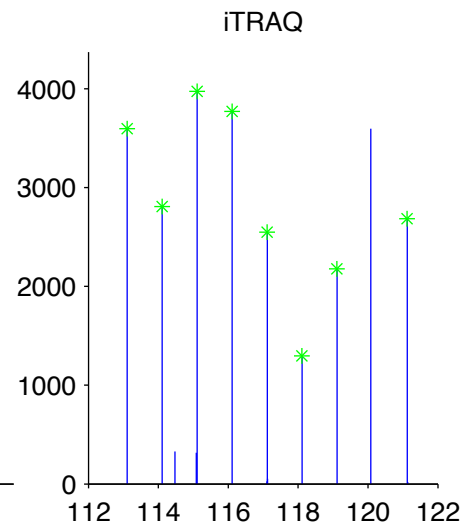

L [ y ] E [ Q ] L [ S ] G

phosphatidylethanolamine binding protein 1  
 Charge State: +3  
 Scan Number: 5466  
 File Name: 091130ptp1blivers\_hfd\_basal2.raw

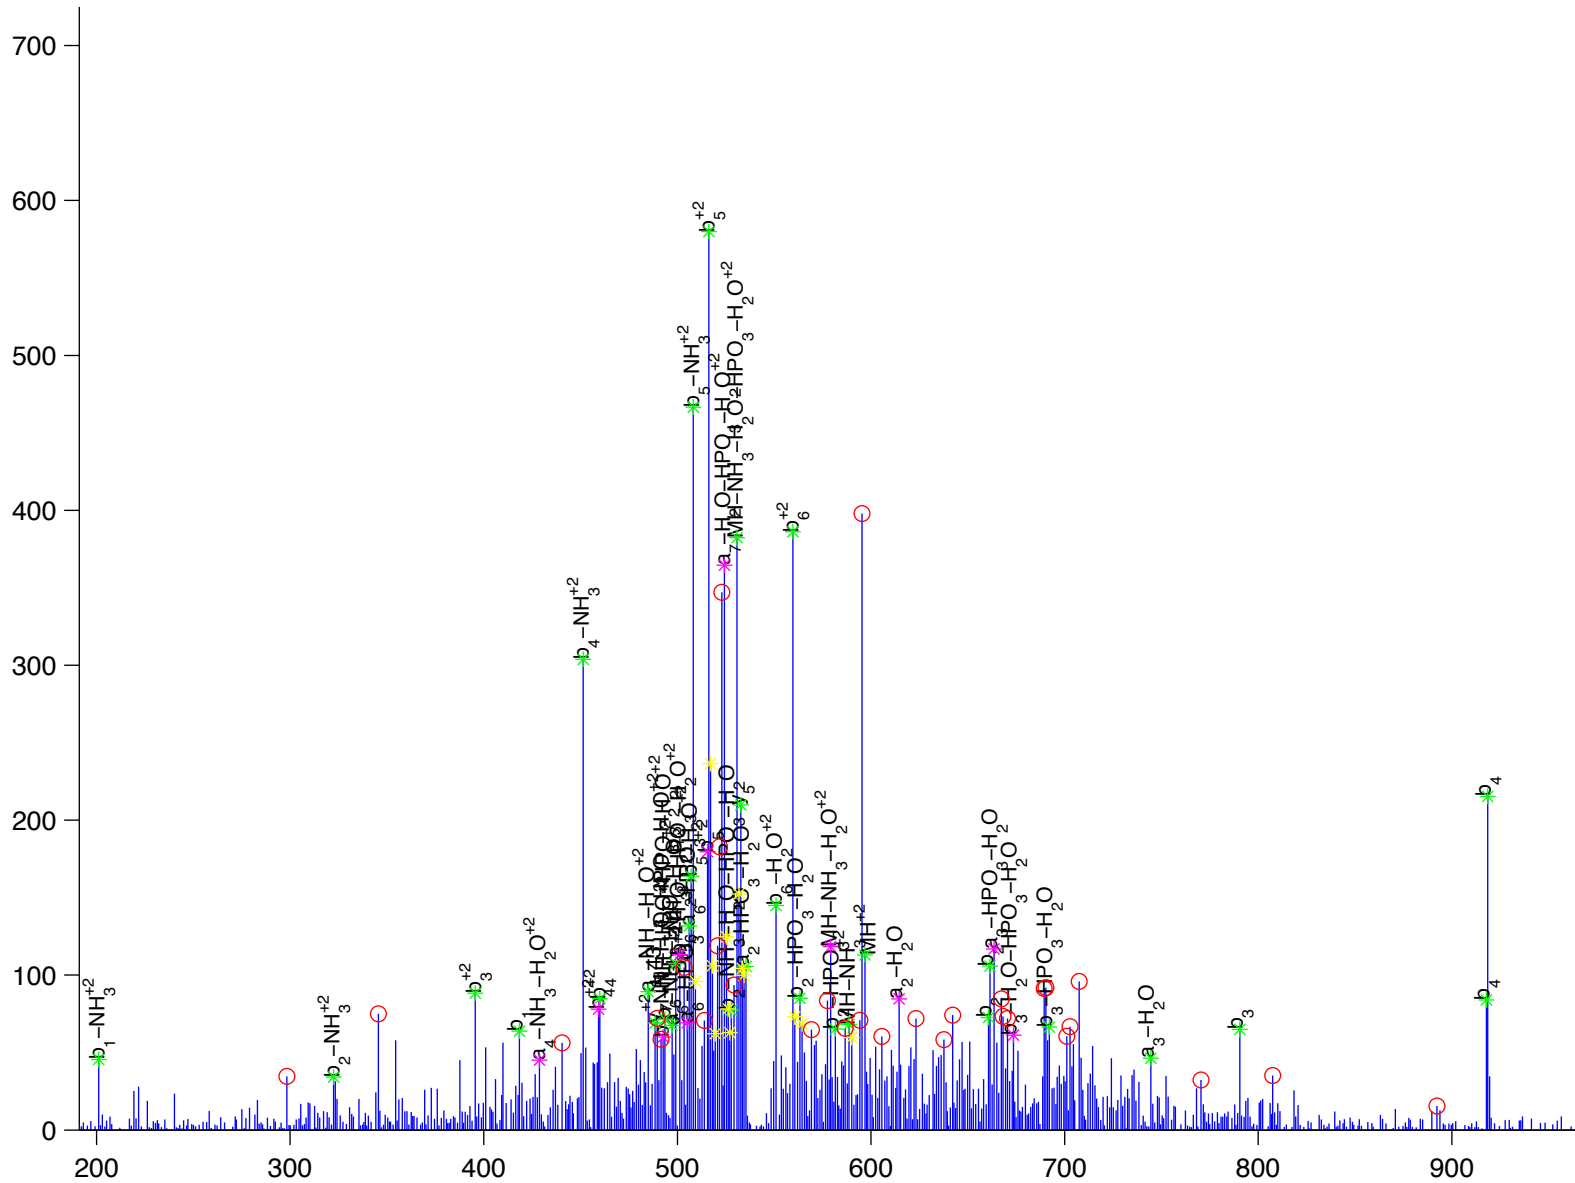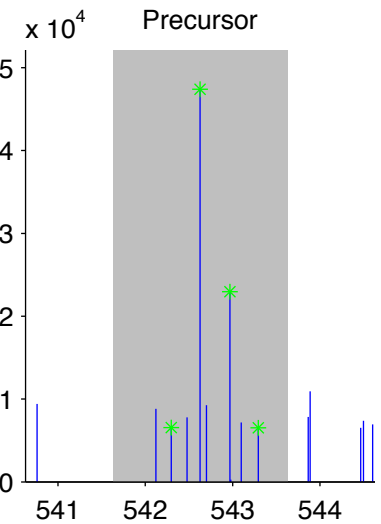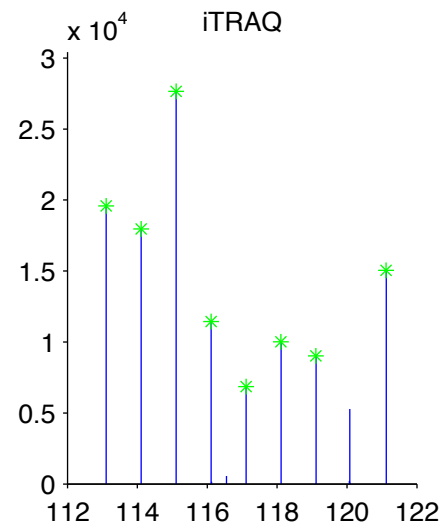

L [ y ] [ E ] [ E ] [ Y ] [ T ] R

phosphatidylinositol 3 kinase, regulatory subunit, polypeptide 3 (p55)

Charge State: +2

Scan Number: 4407

File Name: 090806ptp1blivers\_M\_NC2.raw

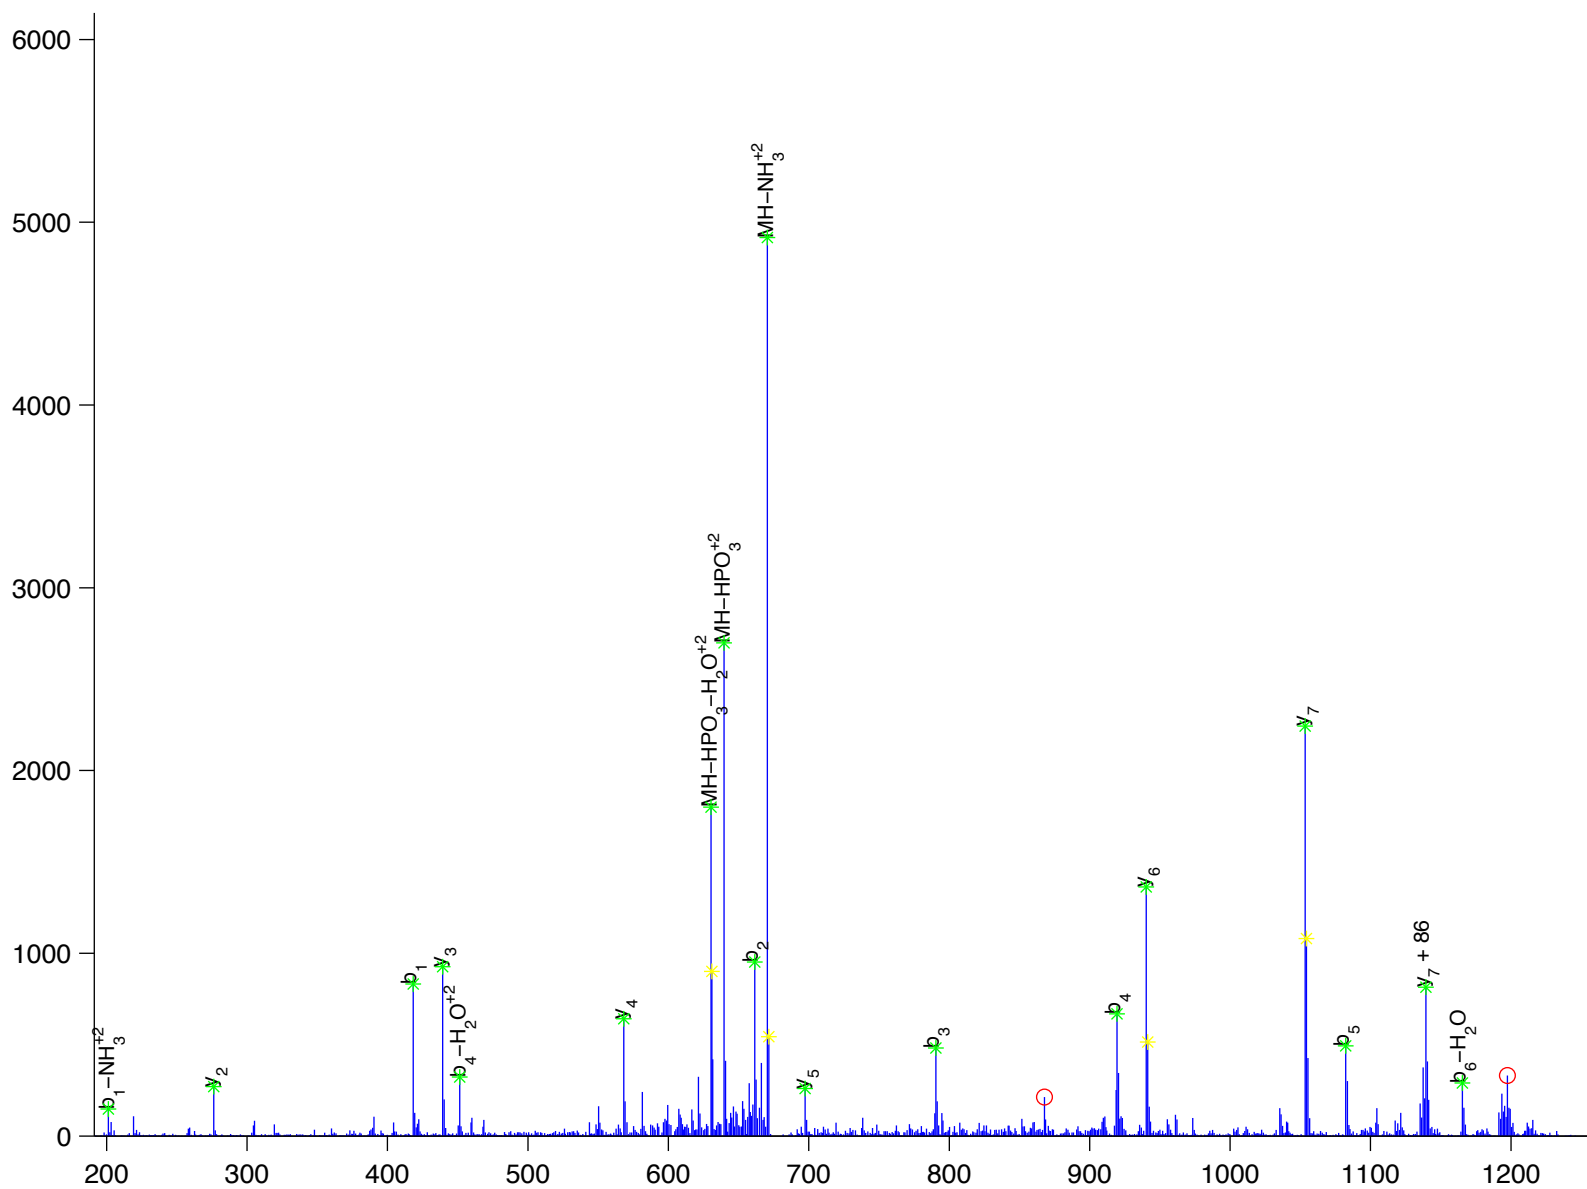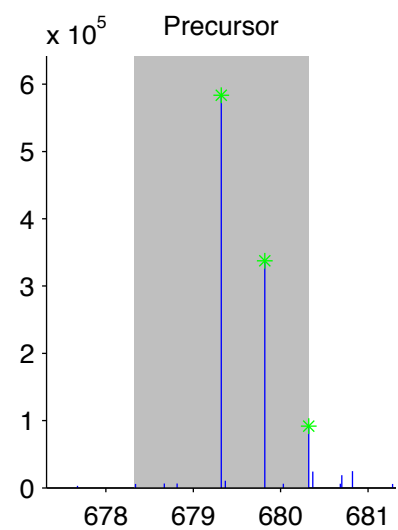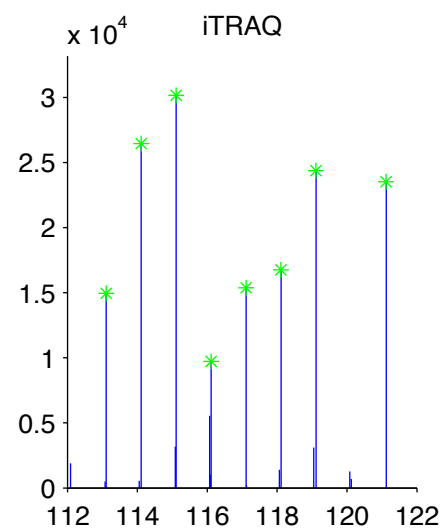

D [ Q ] y [ L ] M [ W ] L [ T ] Q [ K ]

phosphatidylinositol 3-kinase, regulatory subunit, polypeptide 1 isoform 1

Charge State: +3

Scan Number: 6119

File Name: 090728ptp1blivers\_M\_NC\_ins\_e.raw

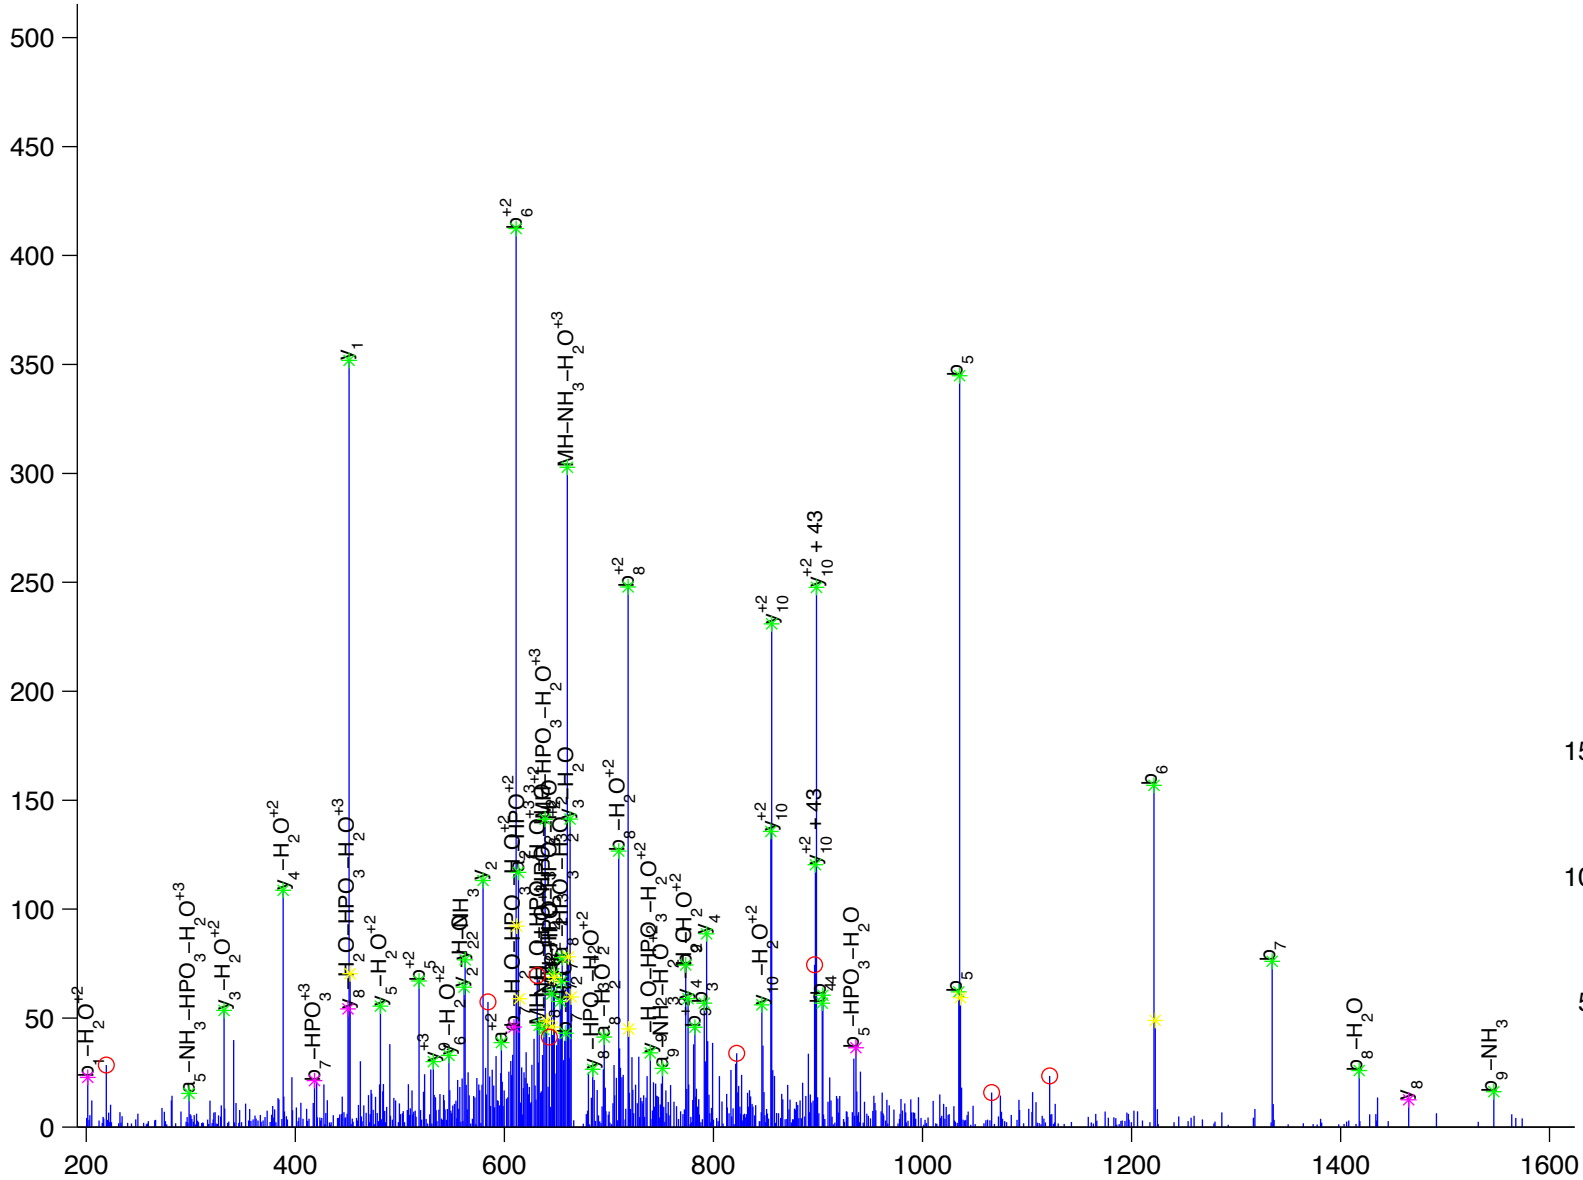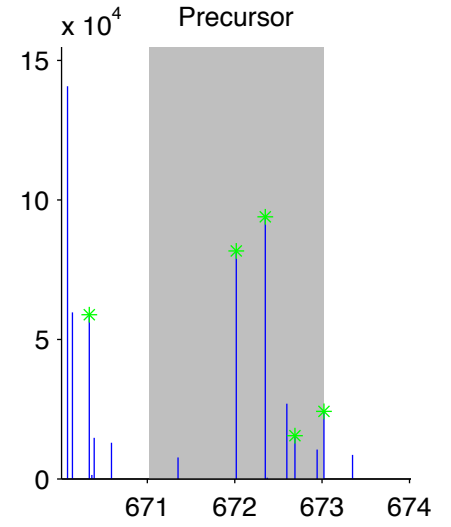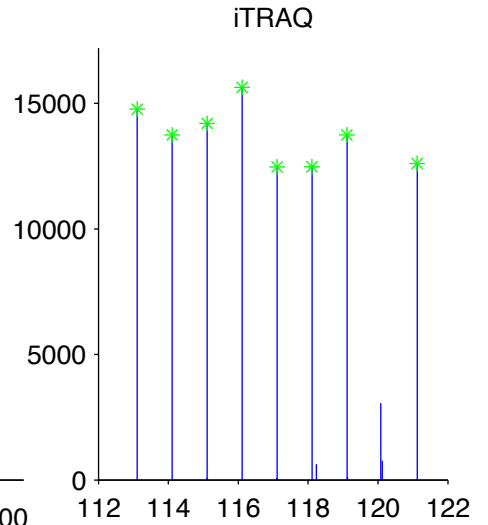

H[V]E[A]I[y]I[D]I[A]D[R]

phosphatidylinositol transfer protein, alpha

Charge State: +3

Scan Number: 6071

File Name: 091130ptp1blivers\_hfd\_basal2.raw

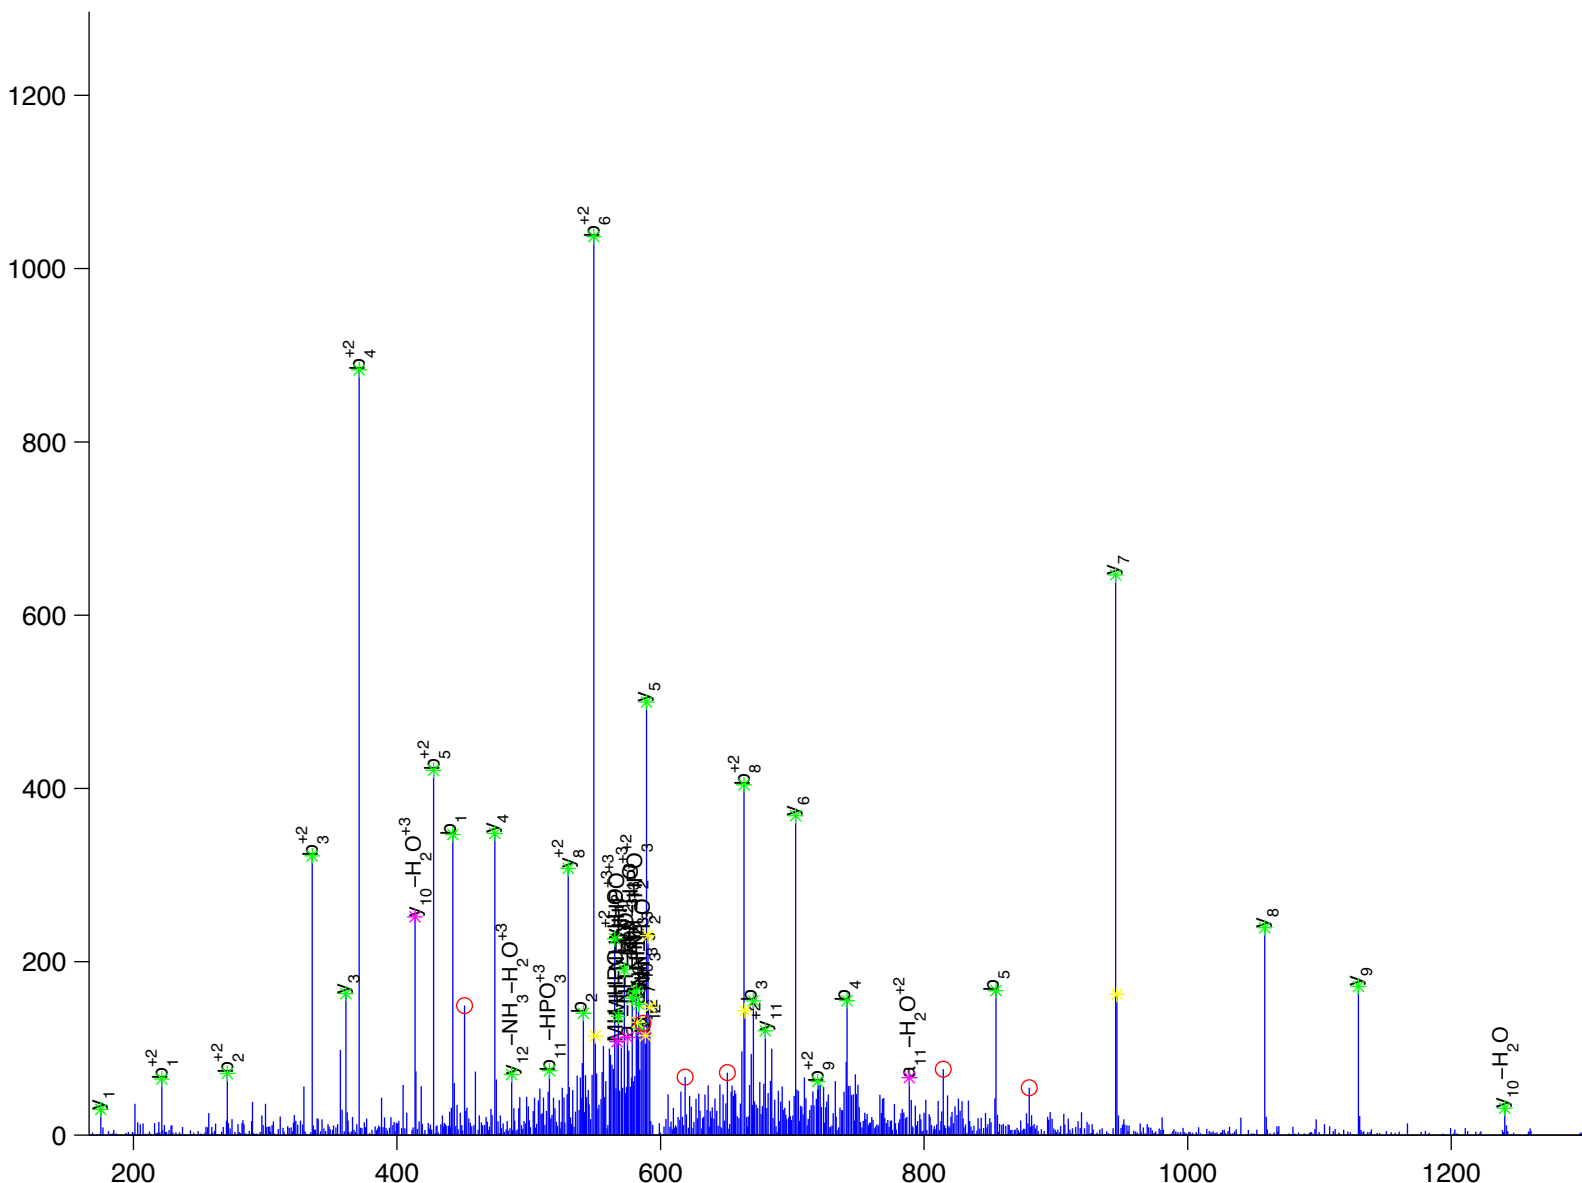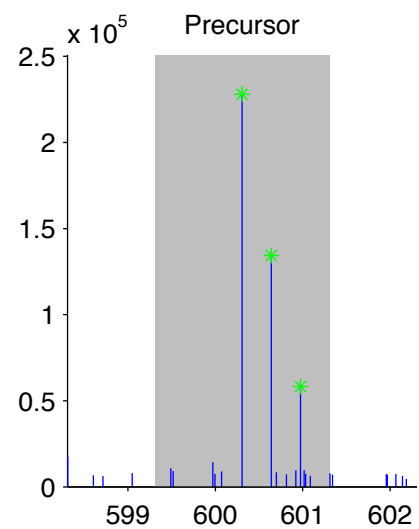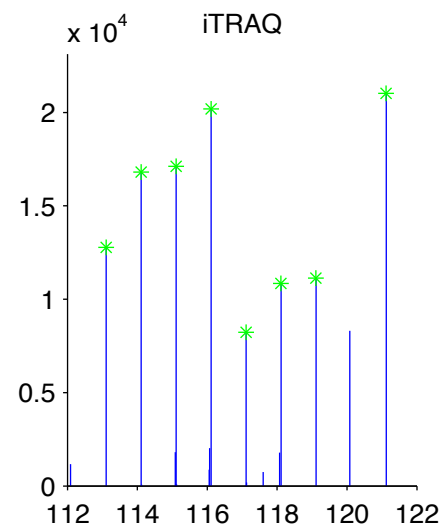

I [A] L y [E] T [P] T [G] W [K]

phosphoglucomutase 2

Charge State: +3

Scan Number: 6848

File Name: 091130ptp1blivers\_hfd\_basal2.raw

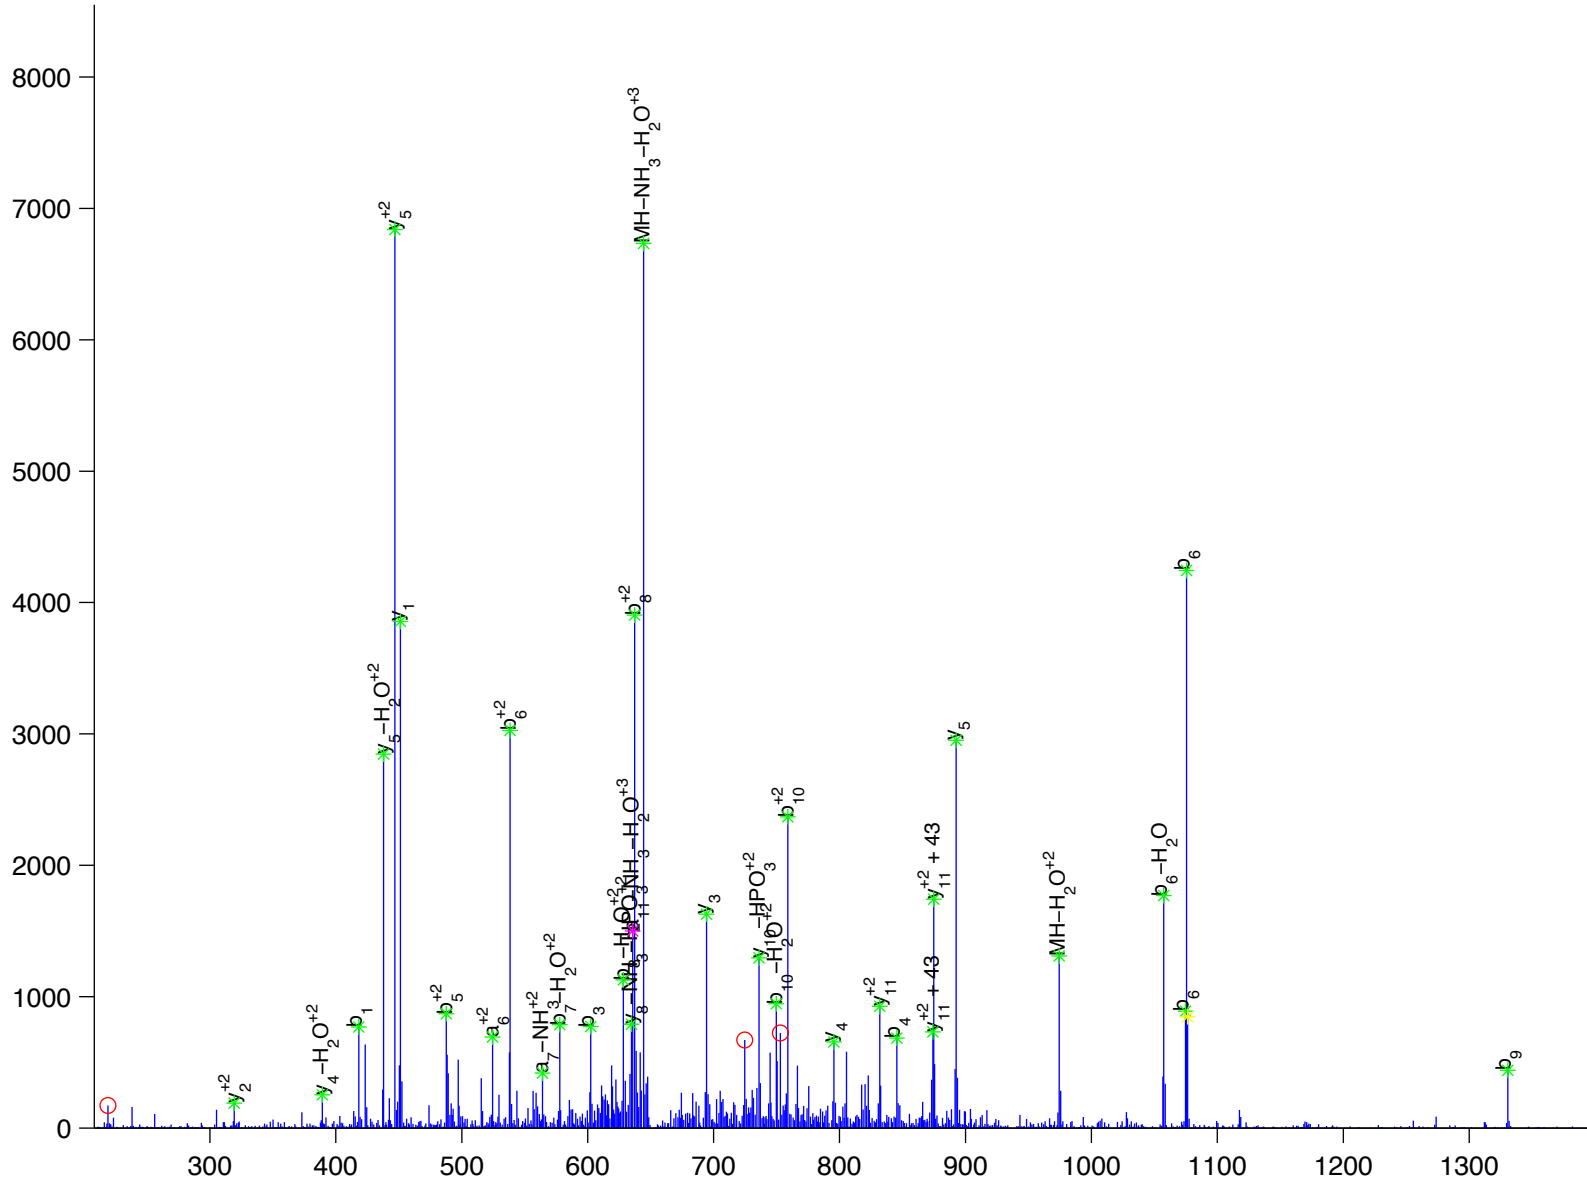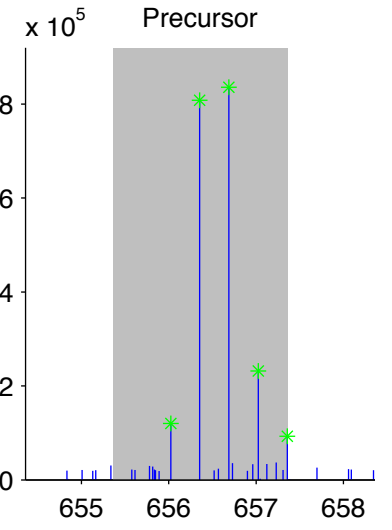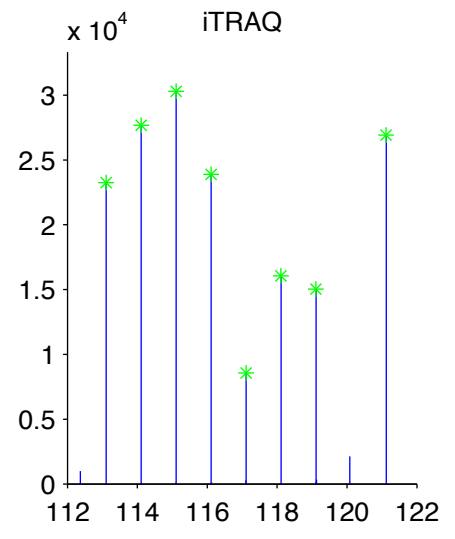

E  
[ L ]  
[ N ]  
y  
[ F ]  
[ A ]  
K

phosphoglycerate kinase 1

Charge State: +3

Scan Number: 5823

File Name: 091130ptp1blivers\_hfd\_basal2.raw

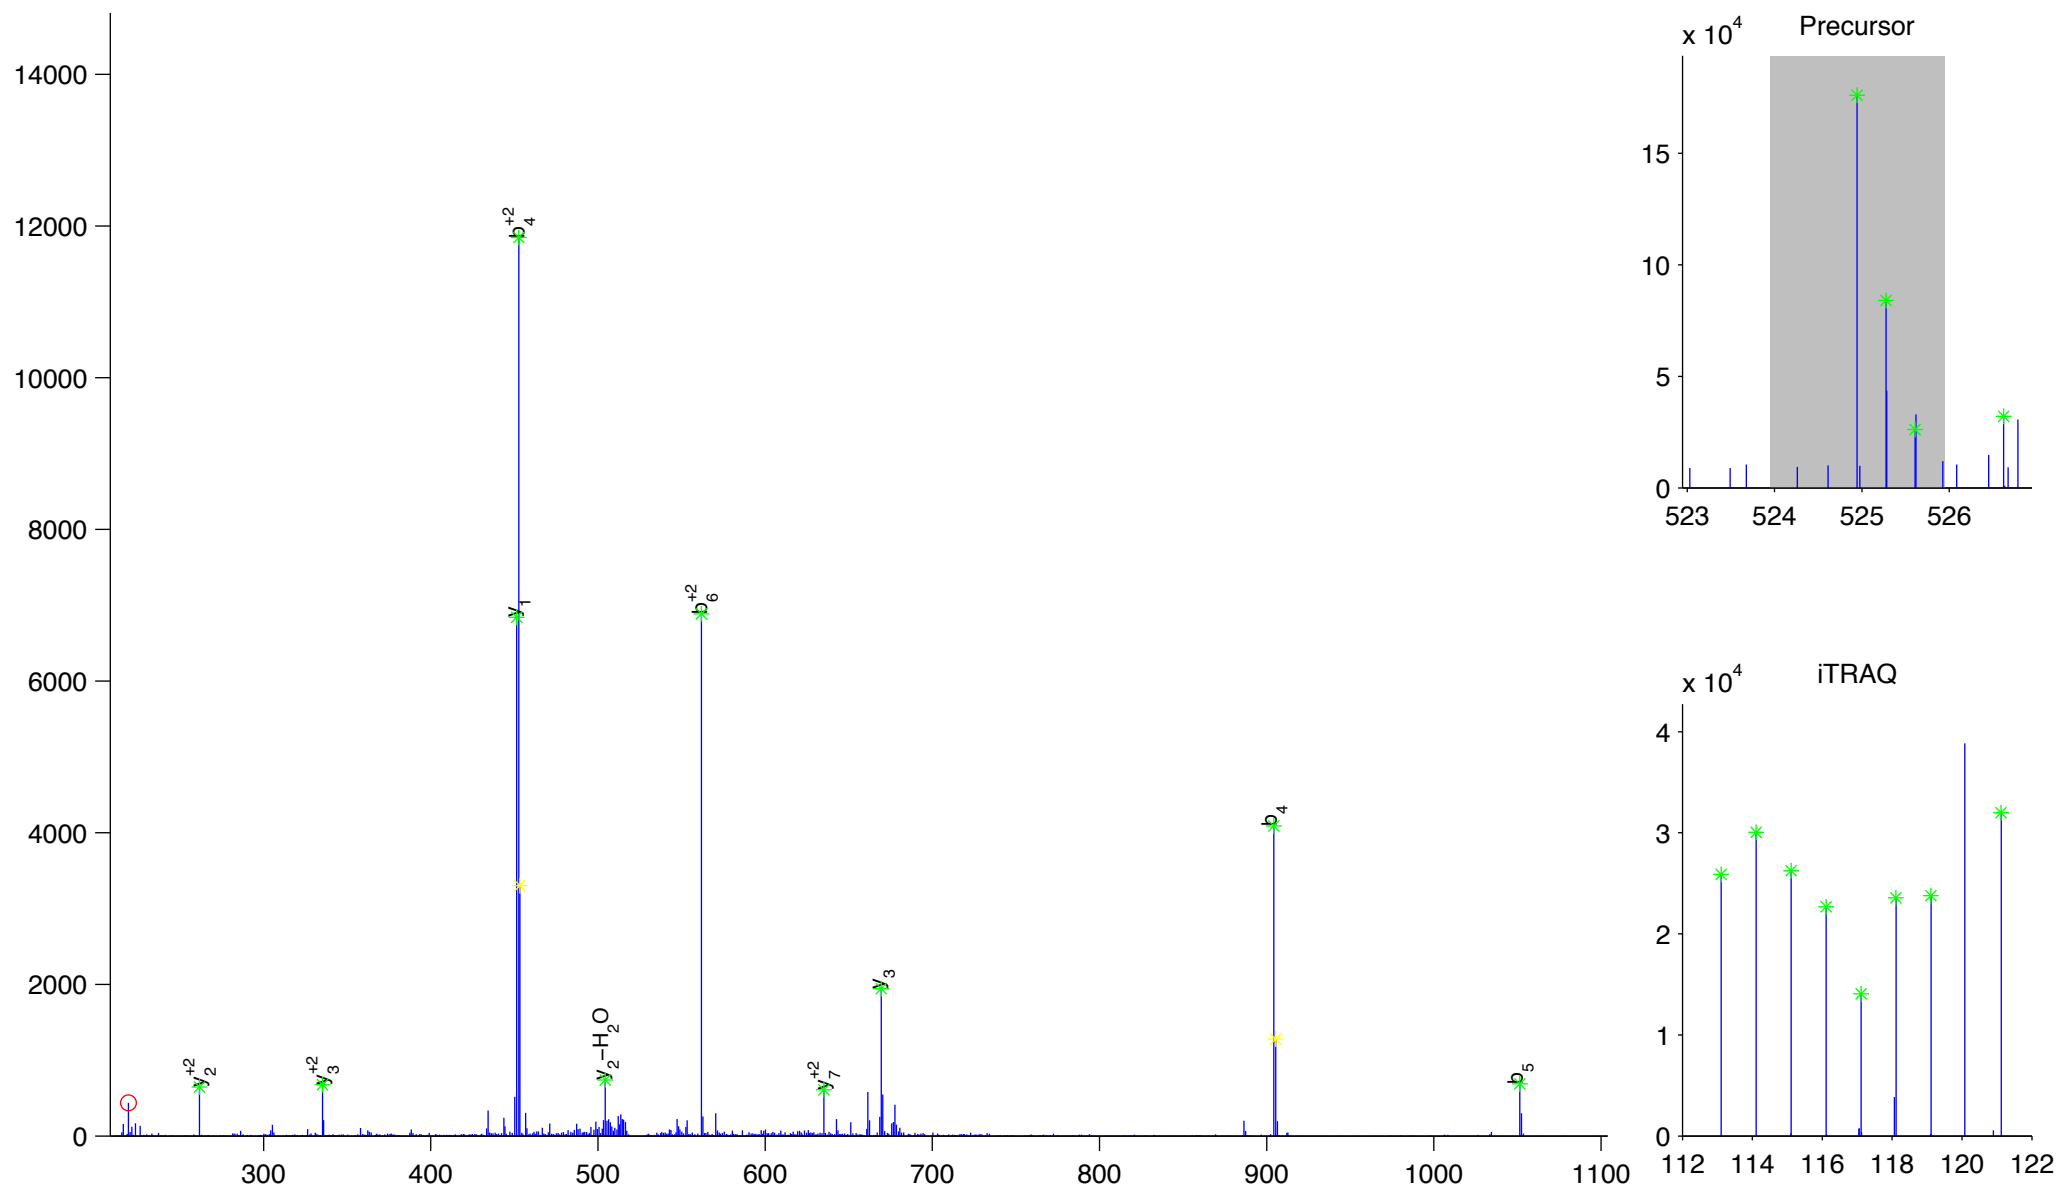

H<sup>+</sup> y<sup>+</sup> G<sup>+</sup> G<sup>+</sup> L<sup>+</sup> T<sup>+</sup> G<sup>+</sup> L<sup>+</sup> N<sup>+</sup> K<sup>+</sup>

phosphoglycerate mutase 2

Charge State: +3

Scan Number: 4393

File Name: 091130ptp1blivers\_hfd\_basal2.raw

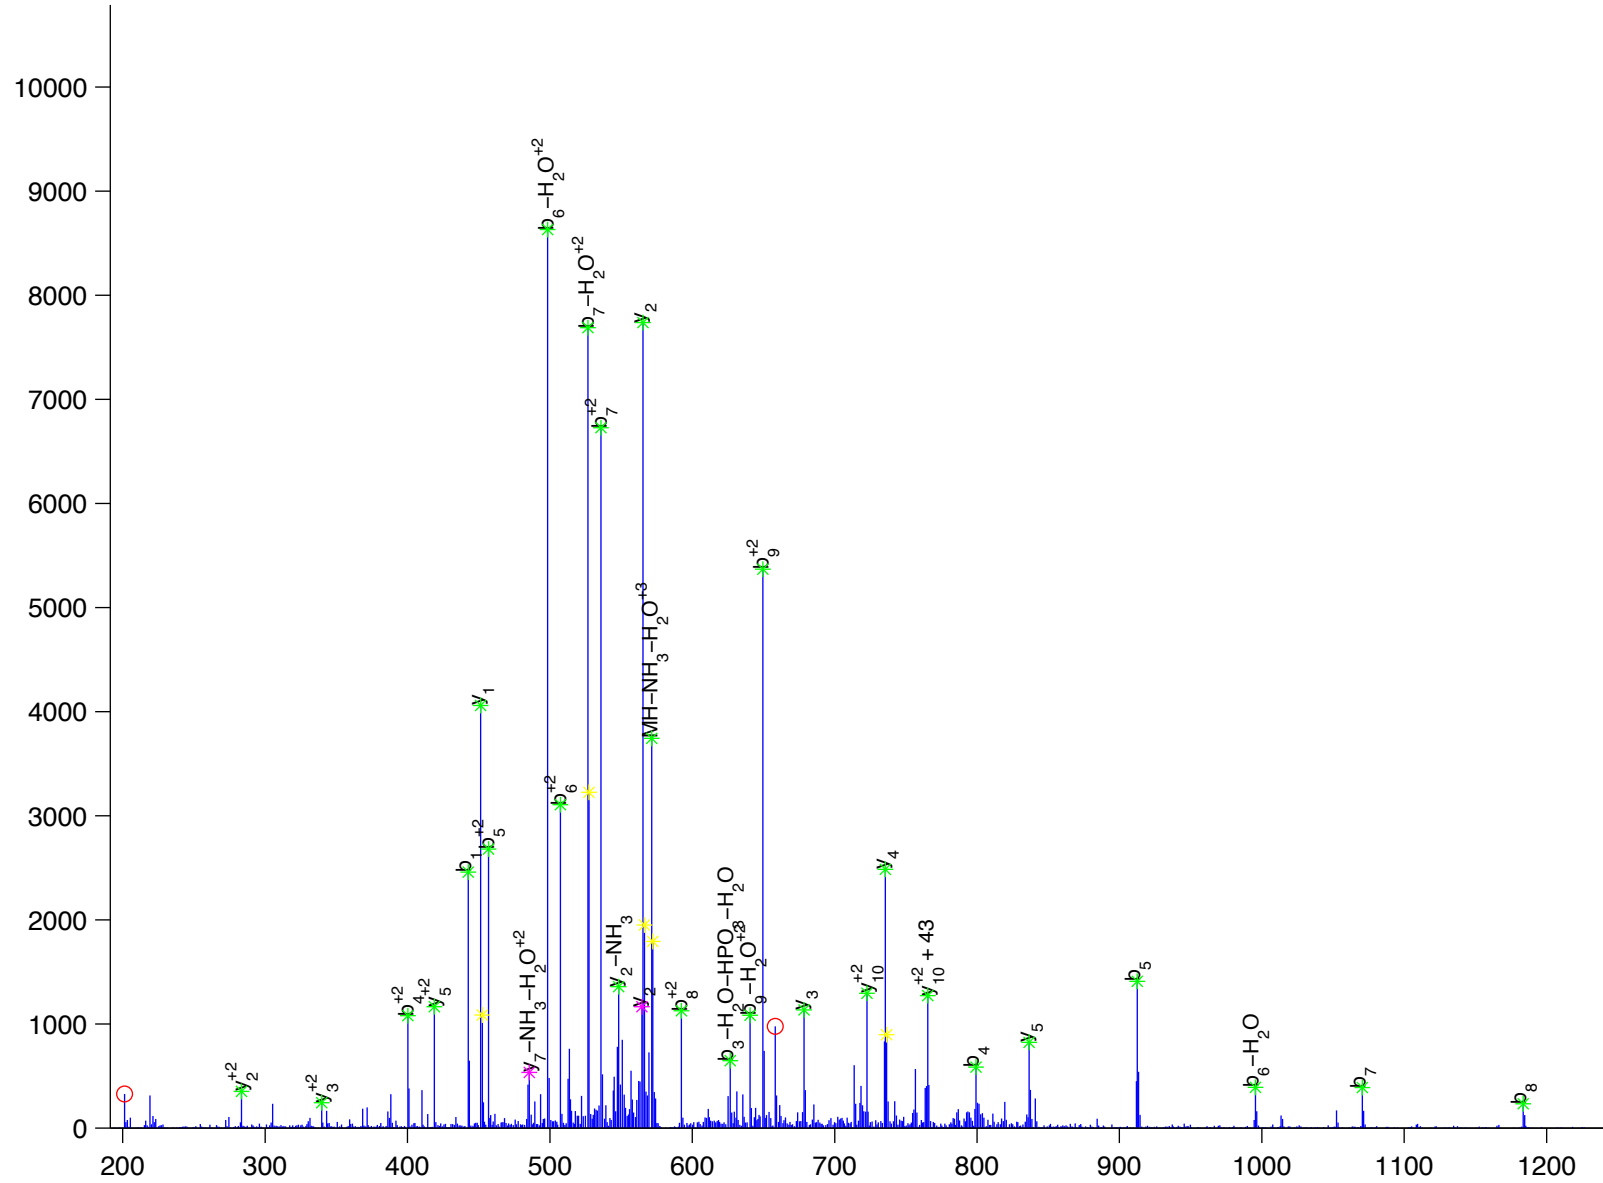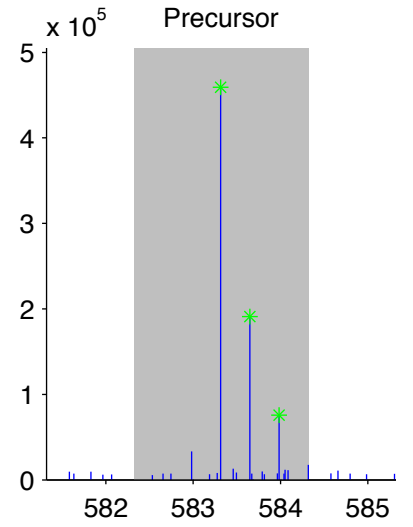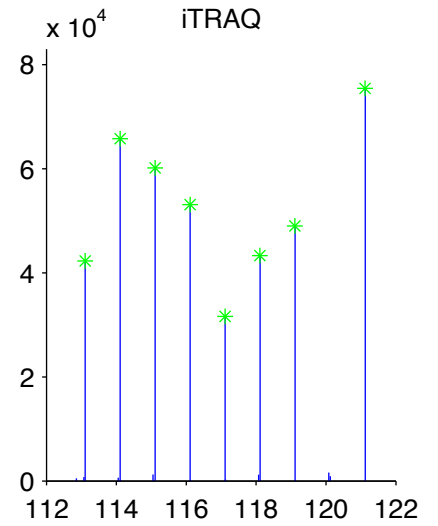



I [G] T [A] E [P] D [y] G [A] L [Y] E [G] R

phospholipase C, gamma 1

Charge State: +3

Scan Number: 5569

File Name: 090806ptp1blivers\_M\_NC2.raw

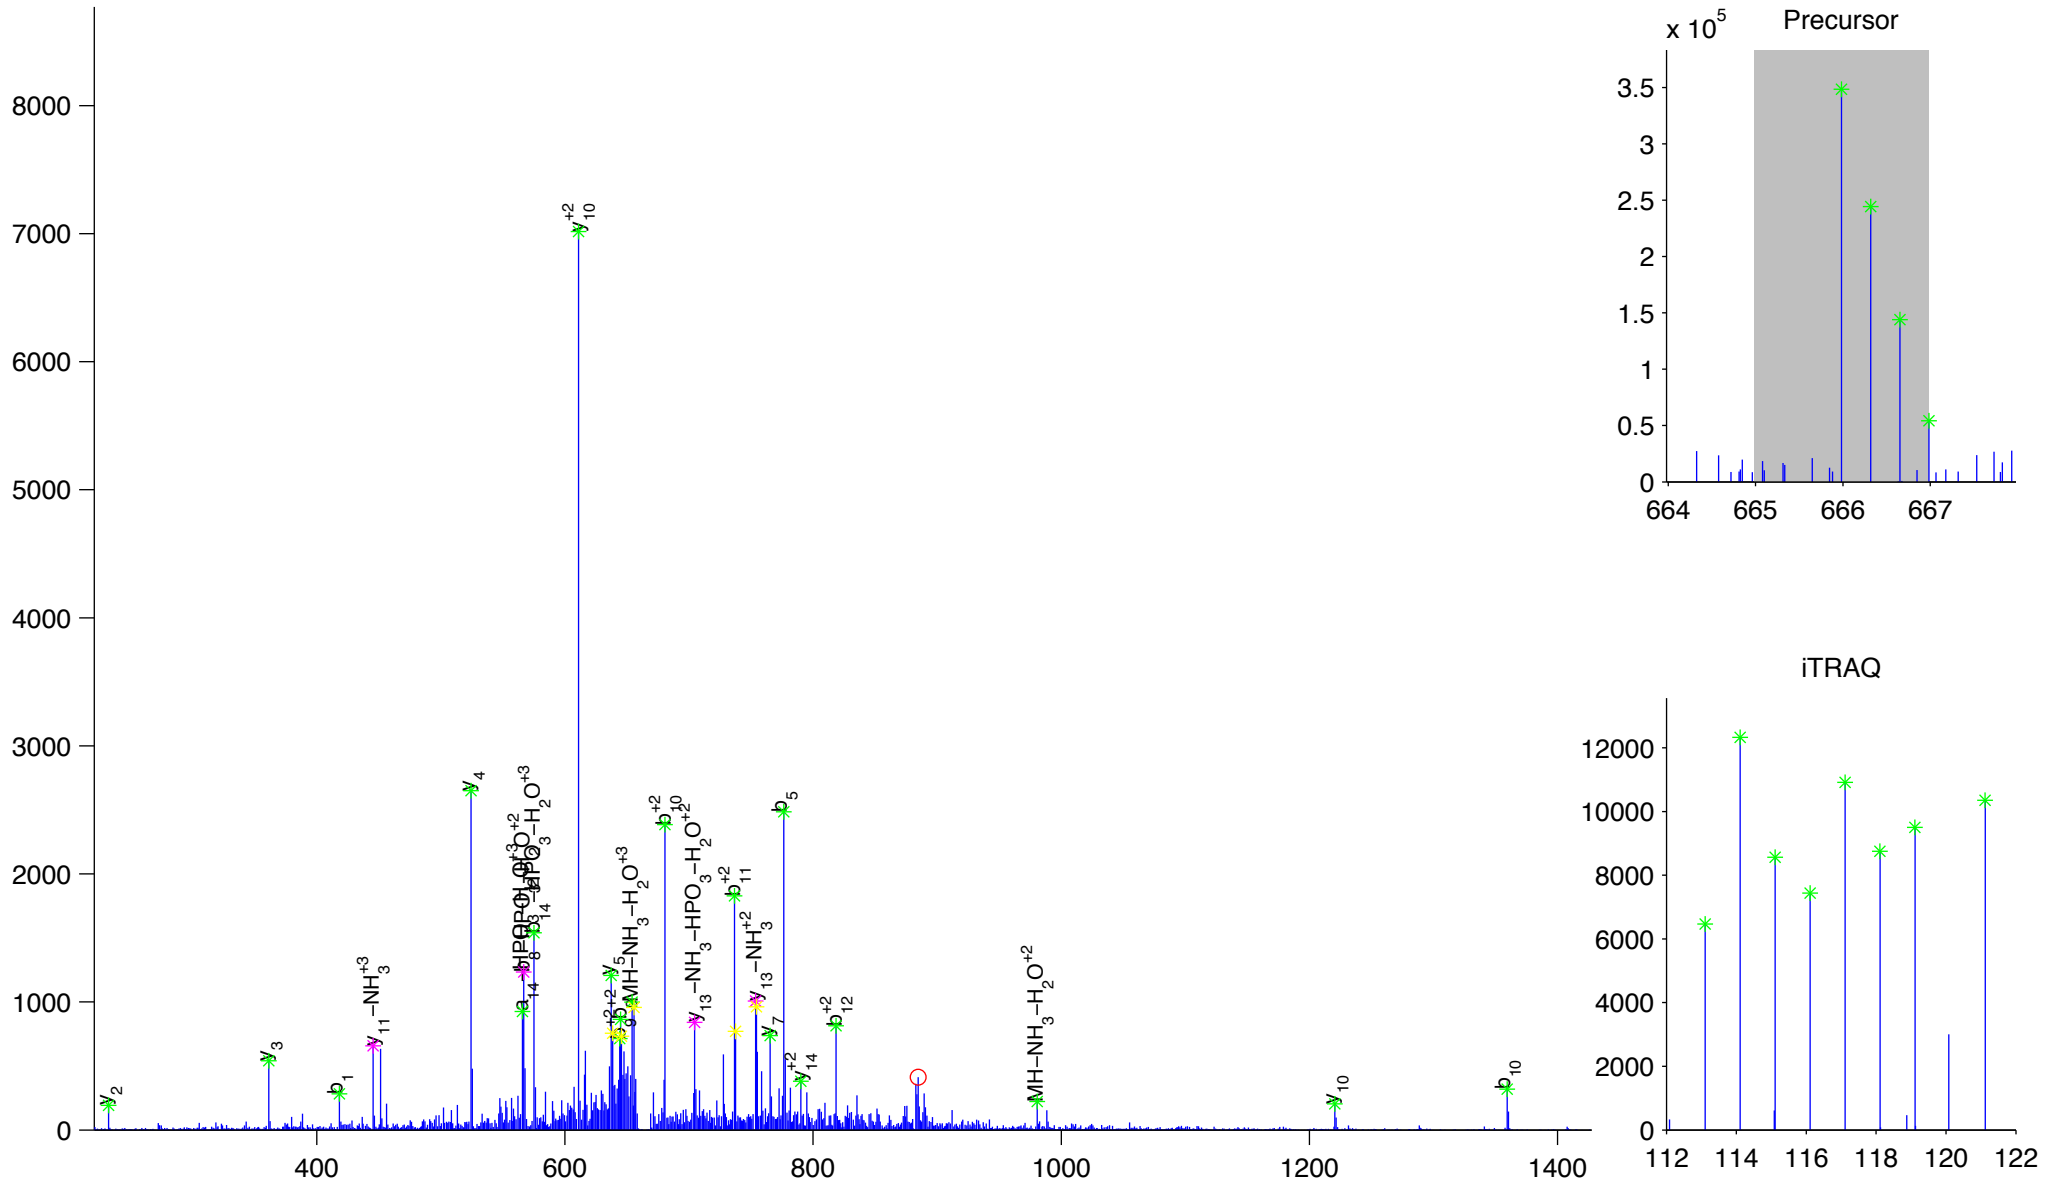

E [ S ] [ D ] y [ E ] [ S ] [ I ] [ G ] [ D ] [ L ] [ Q ] [ Q ] [ C ] [ R ]

phosphoprotein associated with glycosphingolipid microdomains 1

Charge State: +3

Scan Number: 4058

File Name: 100905ptp1blivers\_ncHFD\_basal.raw

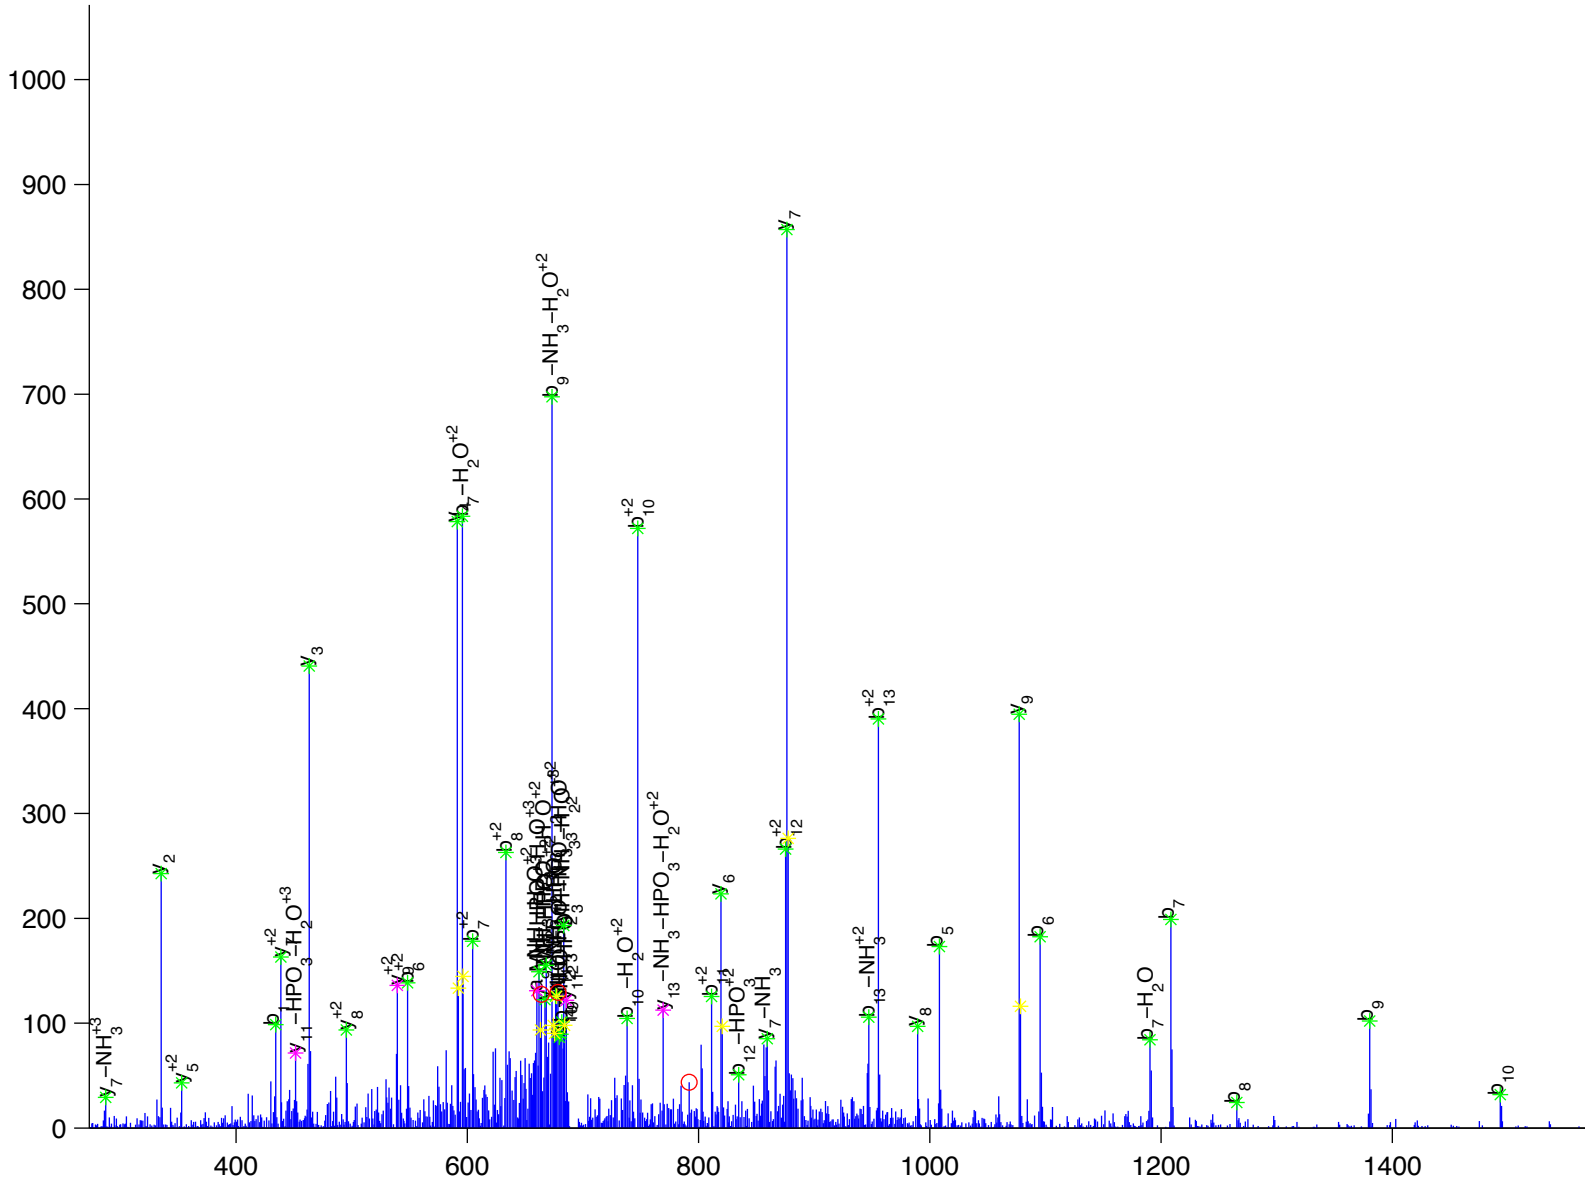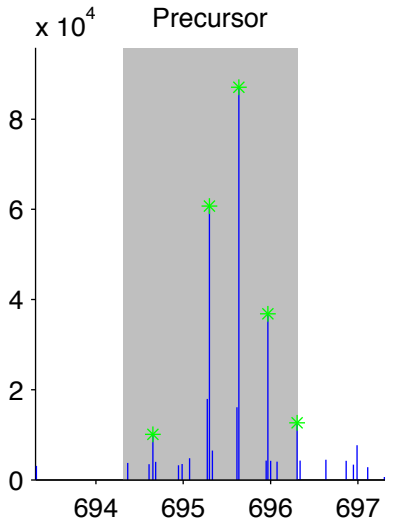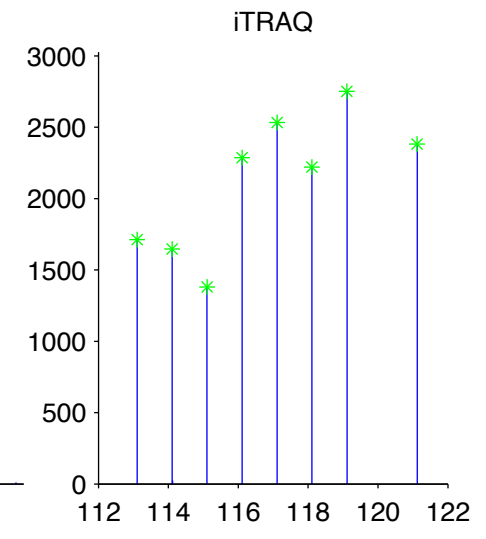

Q[G]I[D]H[E]y[L]S[S]V[D]L]K

pepcolic acid oxidase

Charge State: +4

Scan Number: 5509

File Name: 100908ptp1blivers\_ncHFD3\_basal.raw

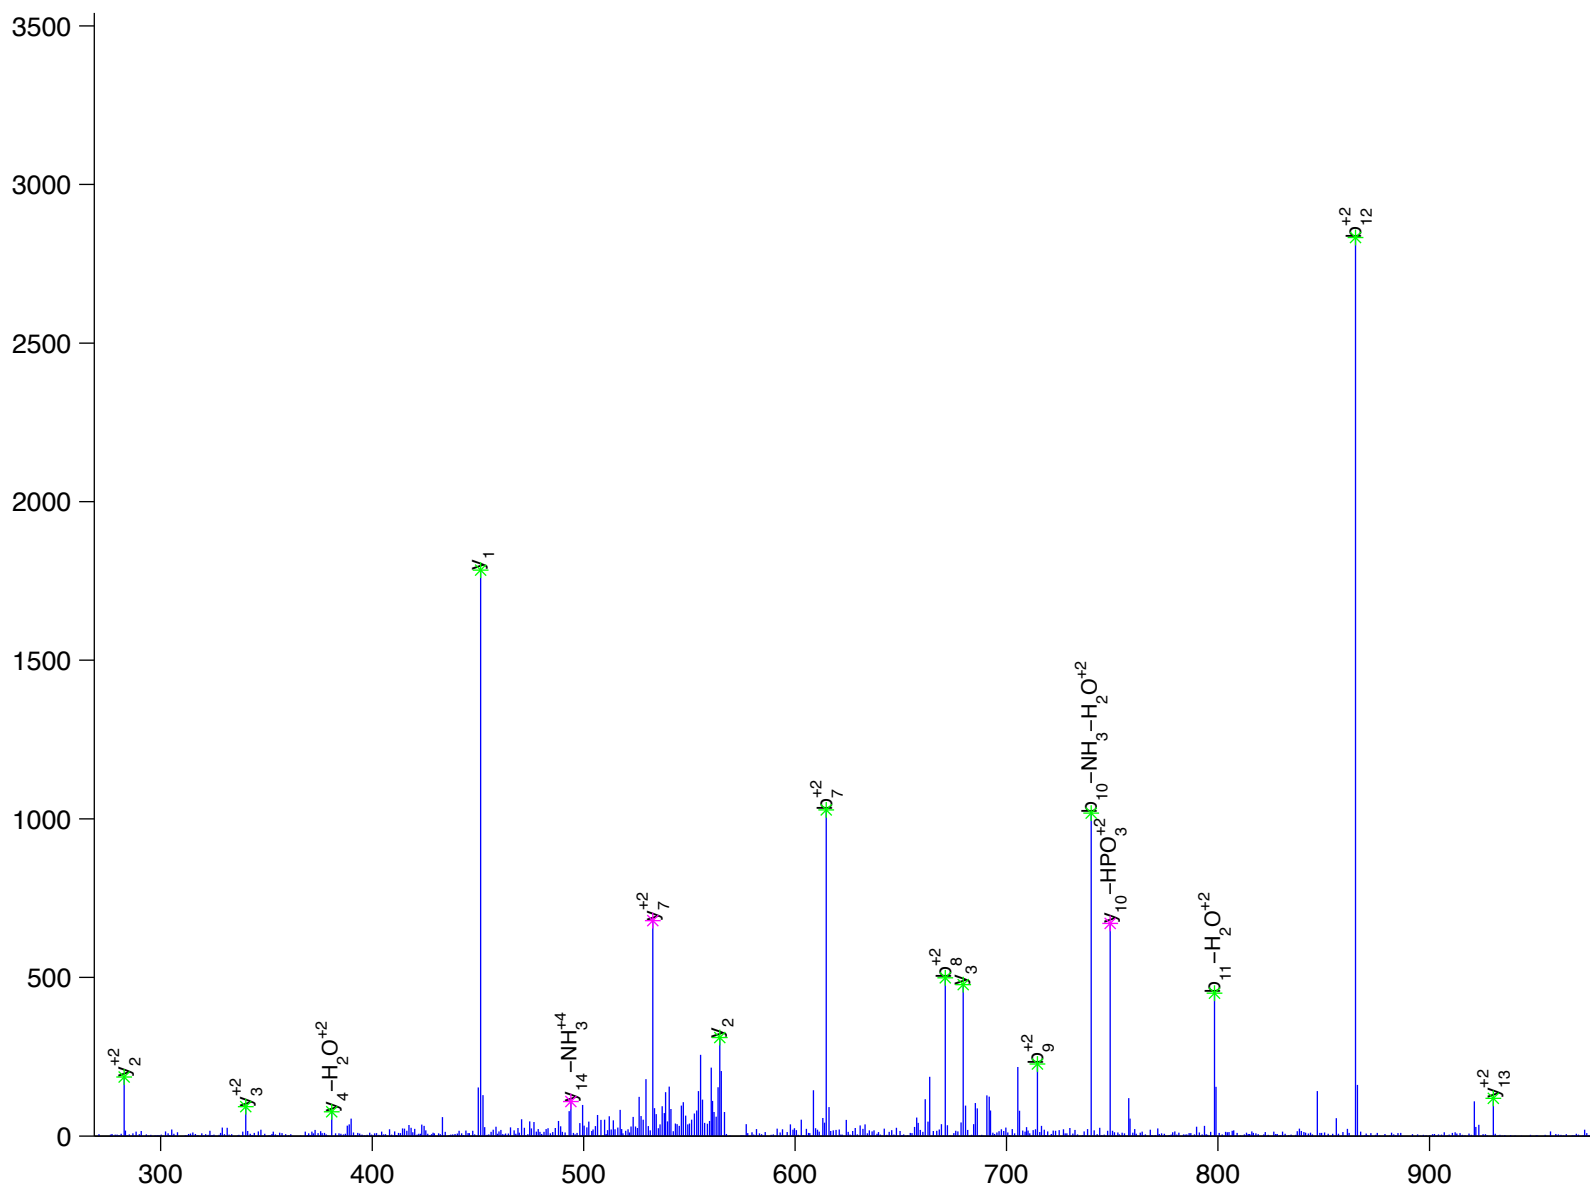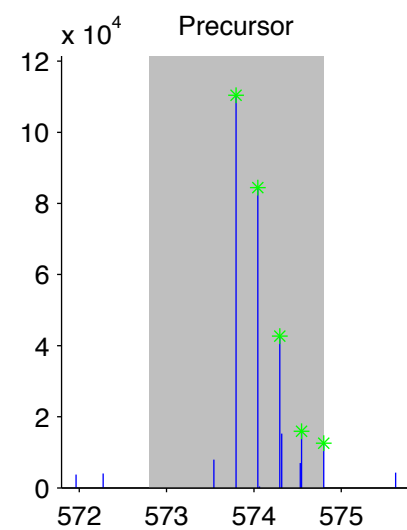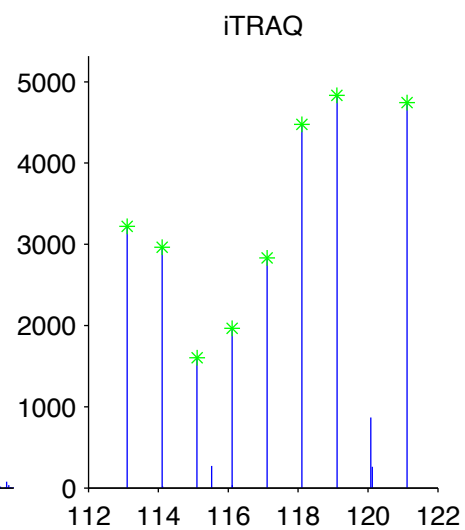

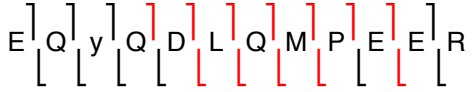

plakophilin 2  
 Charge State: +3  
 Scan Number: 3304  
 File Name: 100827ptp1blivers\_ncHFD\_basal.raw

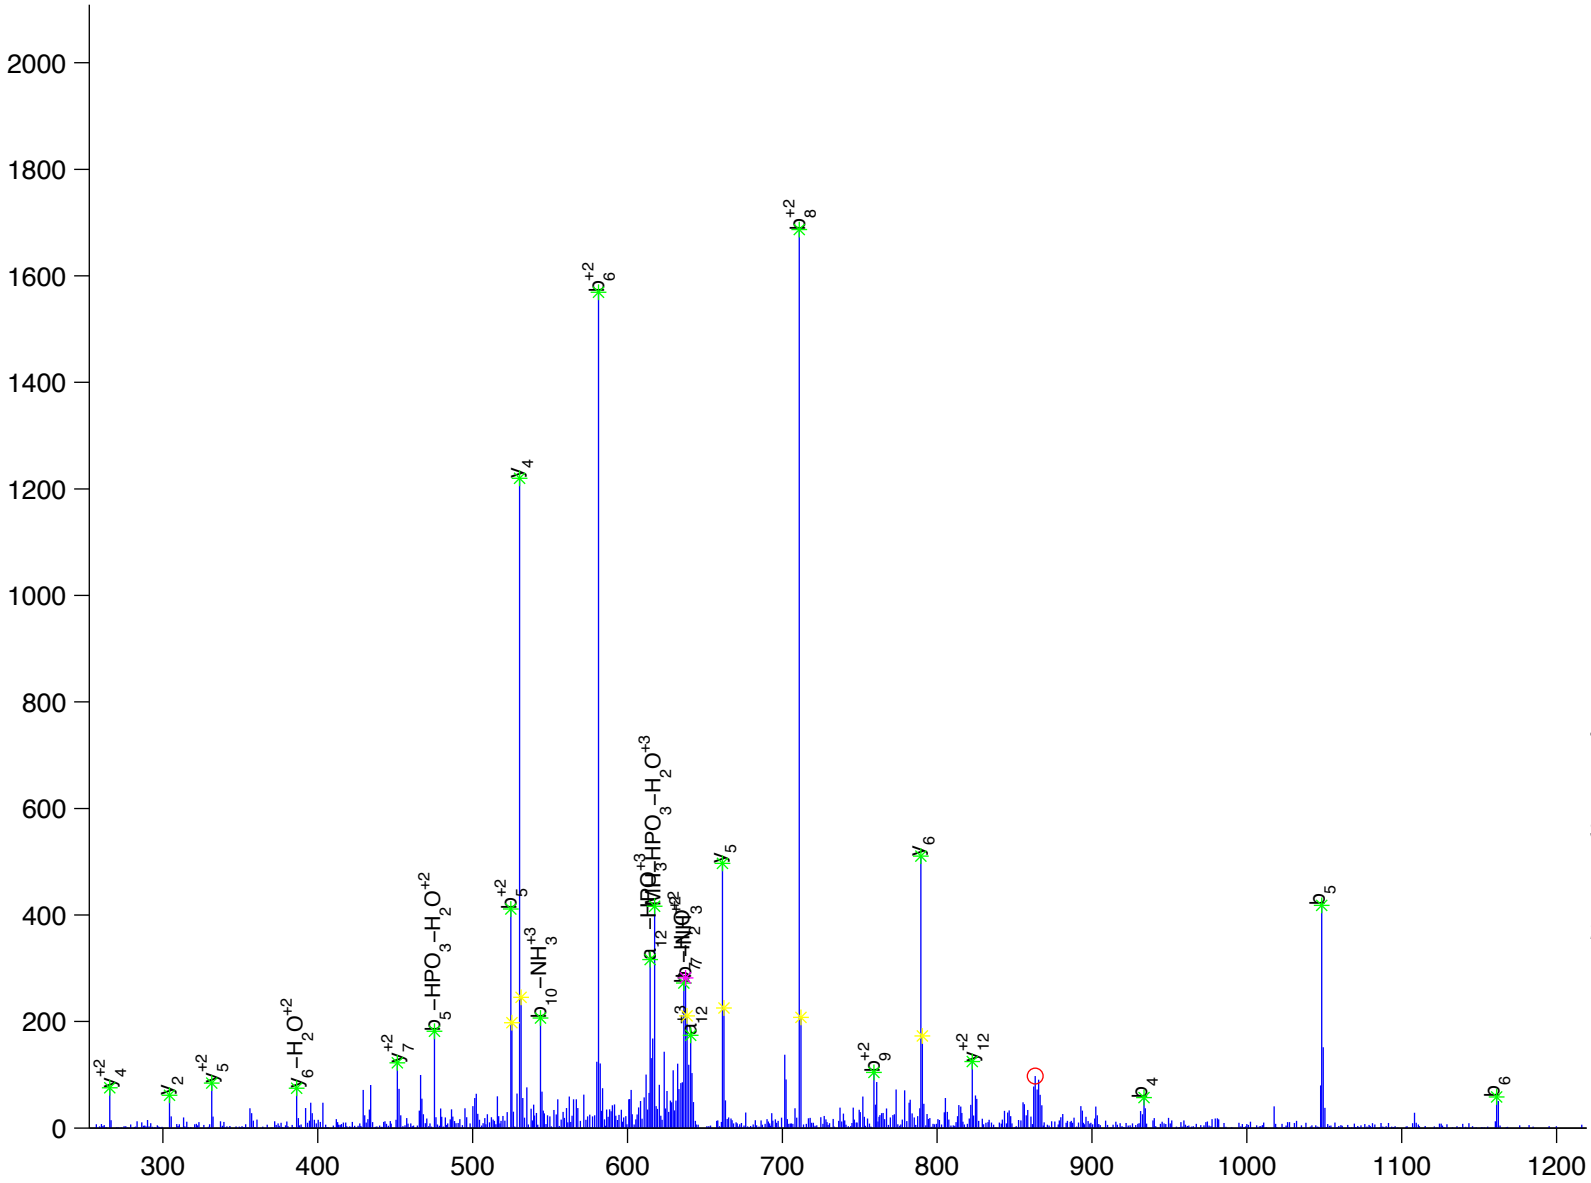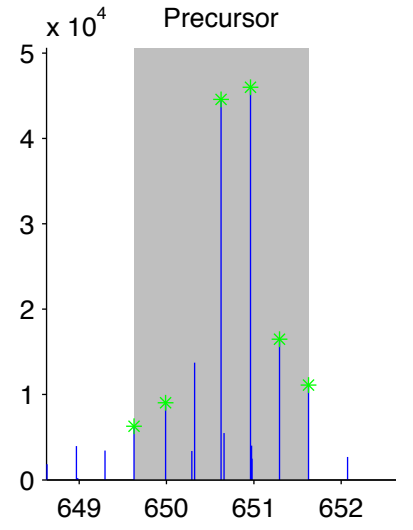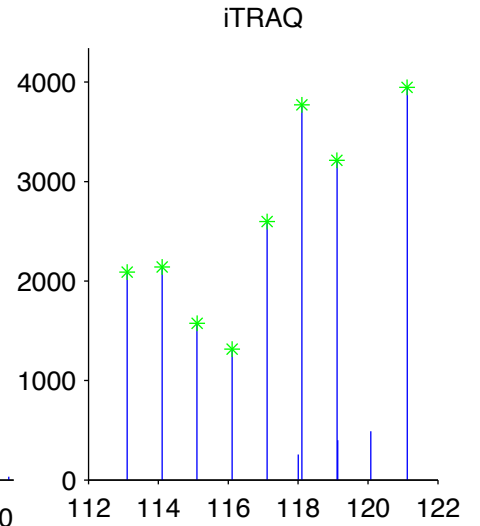

L [ K ] E [ Q ] y [ Q ] D [ L ] Q [ M ] P [ E ] E [ R ]

plakophilin 2  
 Charge State: +3  
 Scan Number: 5088  
 File Name: 091130ptp1blivers\_hfd\_basal2.raw

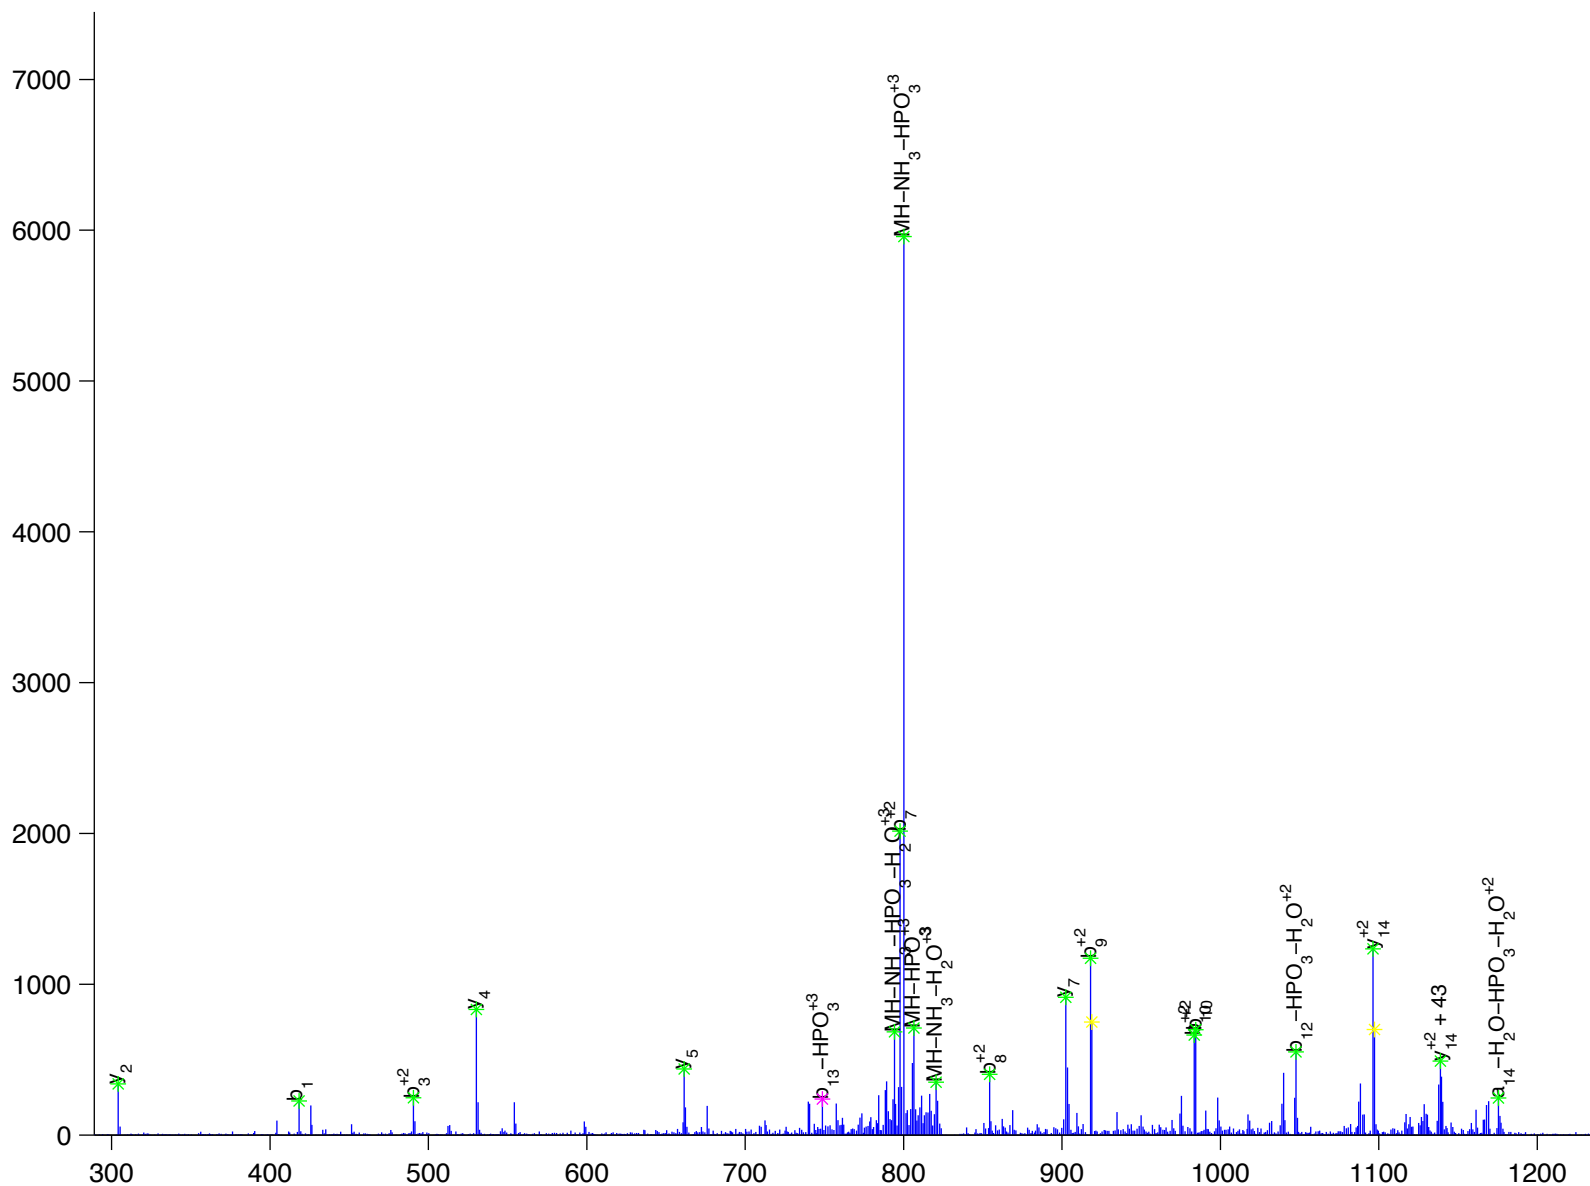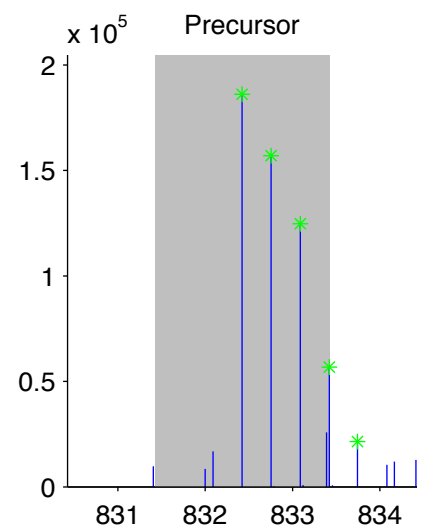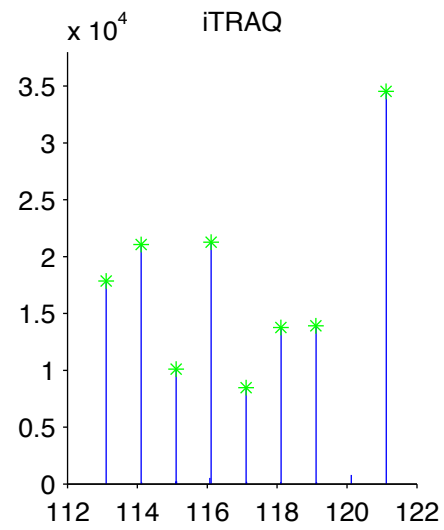

S  
 [ T ]  
 [ T ]  
 [ N ]  
 y  
 [ V ]  
 [ D ]  
 [ F ]  
 [ Y ]  
 [ S ]  
 [ T ]  
 K

plakophilin 4 isoform 1

Charge State: +3

Scan Number: 4214

File Name: 090728ptp1blivers\_M\_NC\_ins\_e.raw

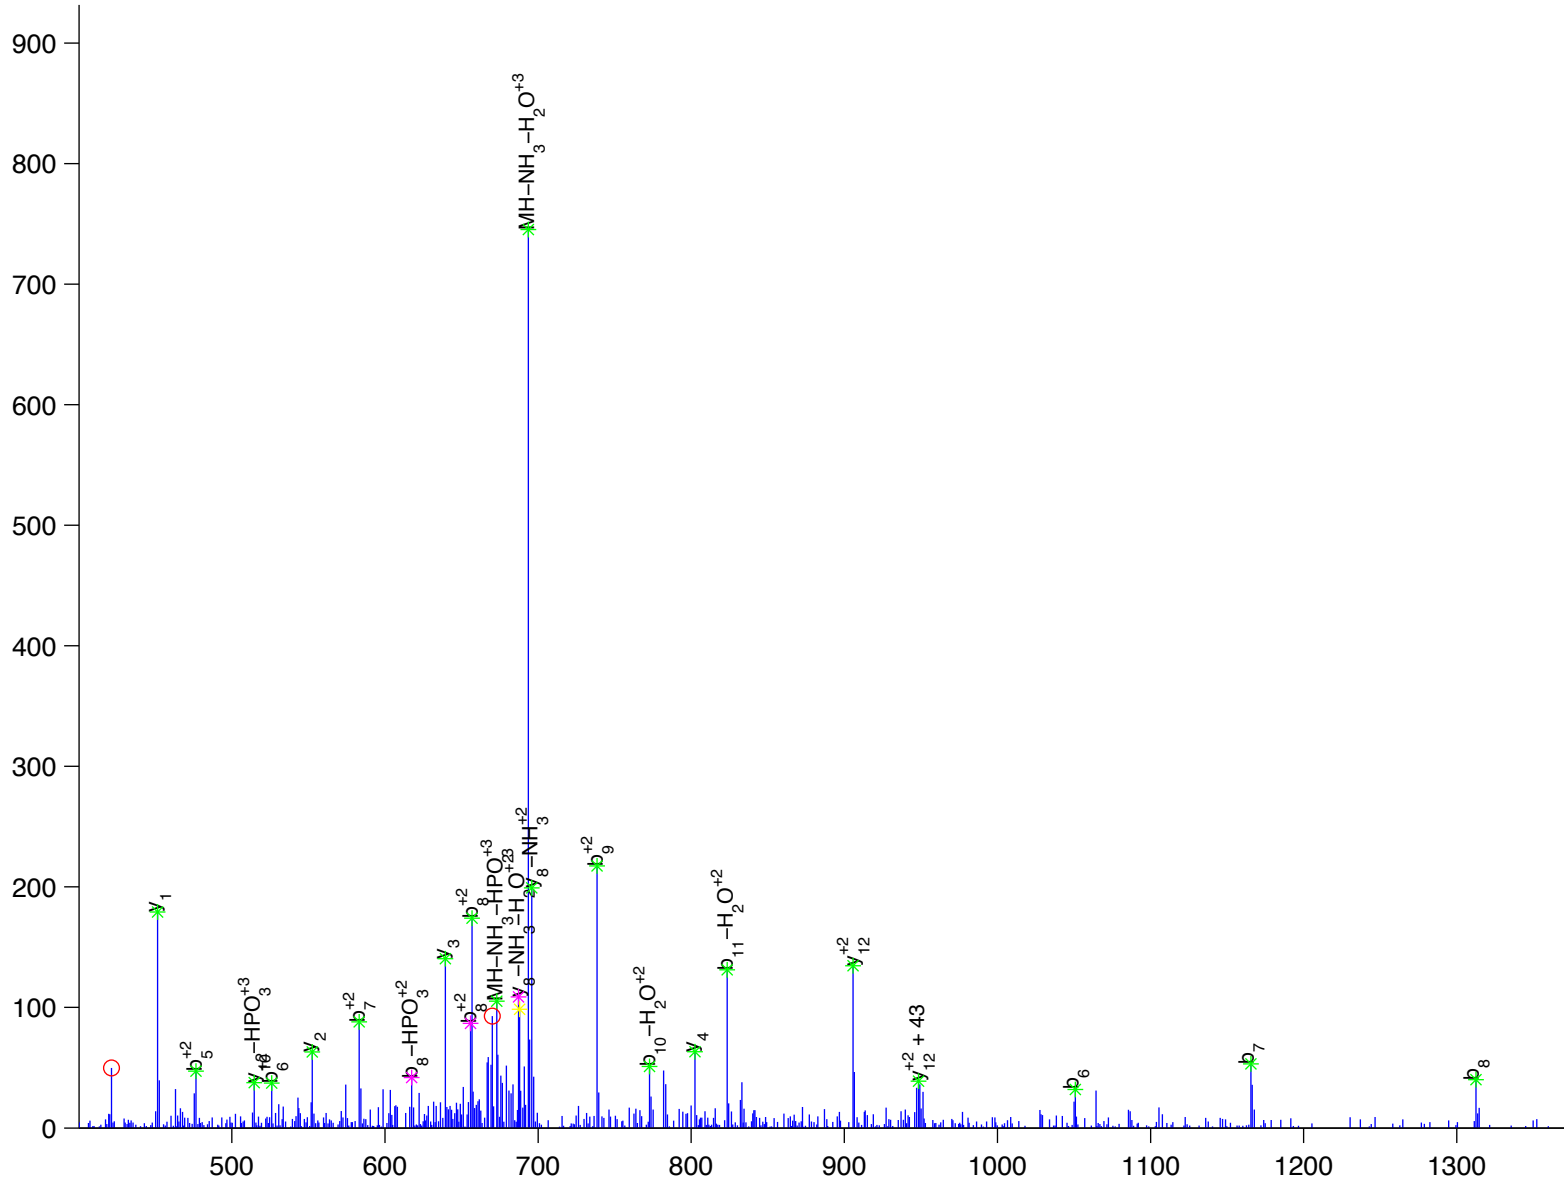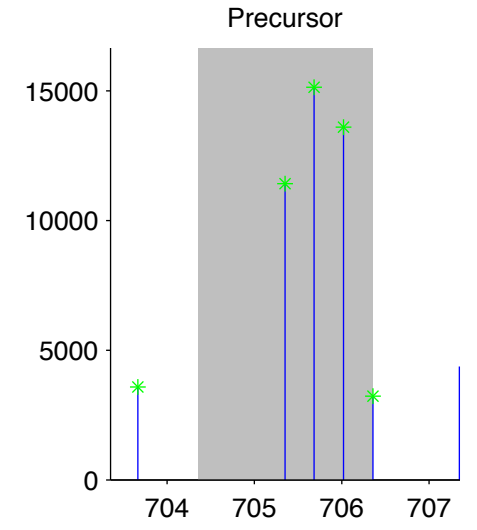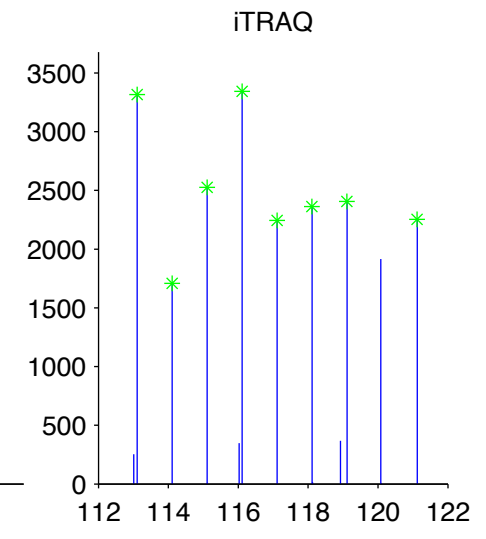

N [ N ] y [ A ] L [ N ] T [ A ] A [ T ] Y [ A ] E [ P ] Y [ R ] P [ V ] Q [ Y ] R

plakophilin 4 isoform 1

Charge State: +3

Scan Number: 5646

File Name: 091130ptp1blivers\_hfd\_basal2.raw

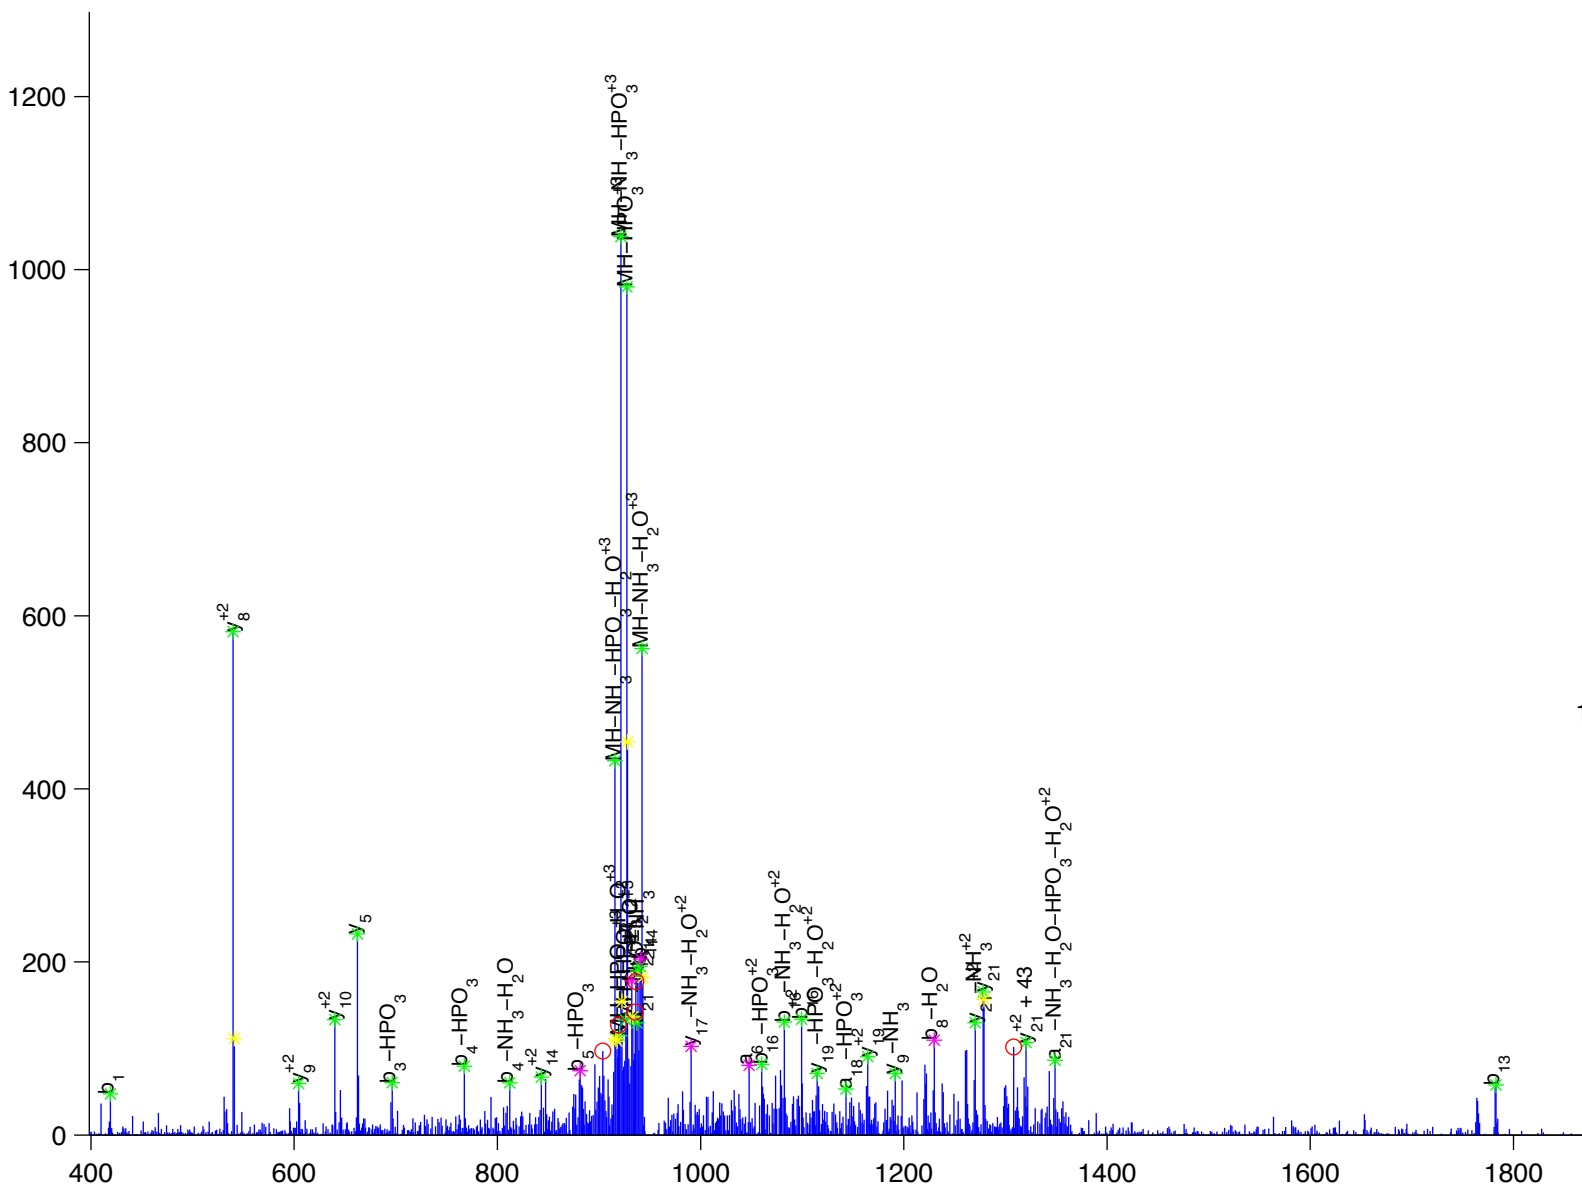

A [ T ] E [ T ] V [ y ] S [ E ] I [ R ]

platelet/endothelial cell adhesion molecule 1 isoform 1

Charge State: +2

Scan Number: 4987

File Name: 091130ptp1blivers\_hfd\_basal2.raw

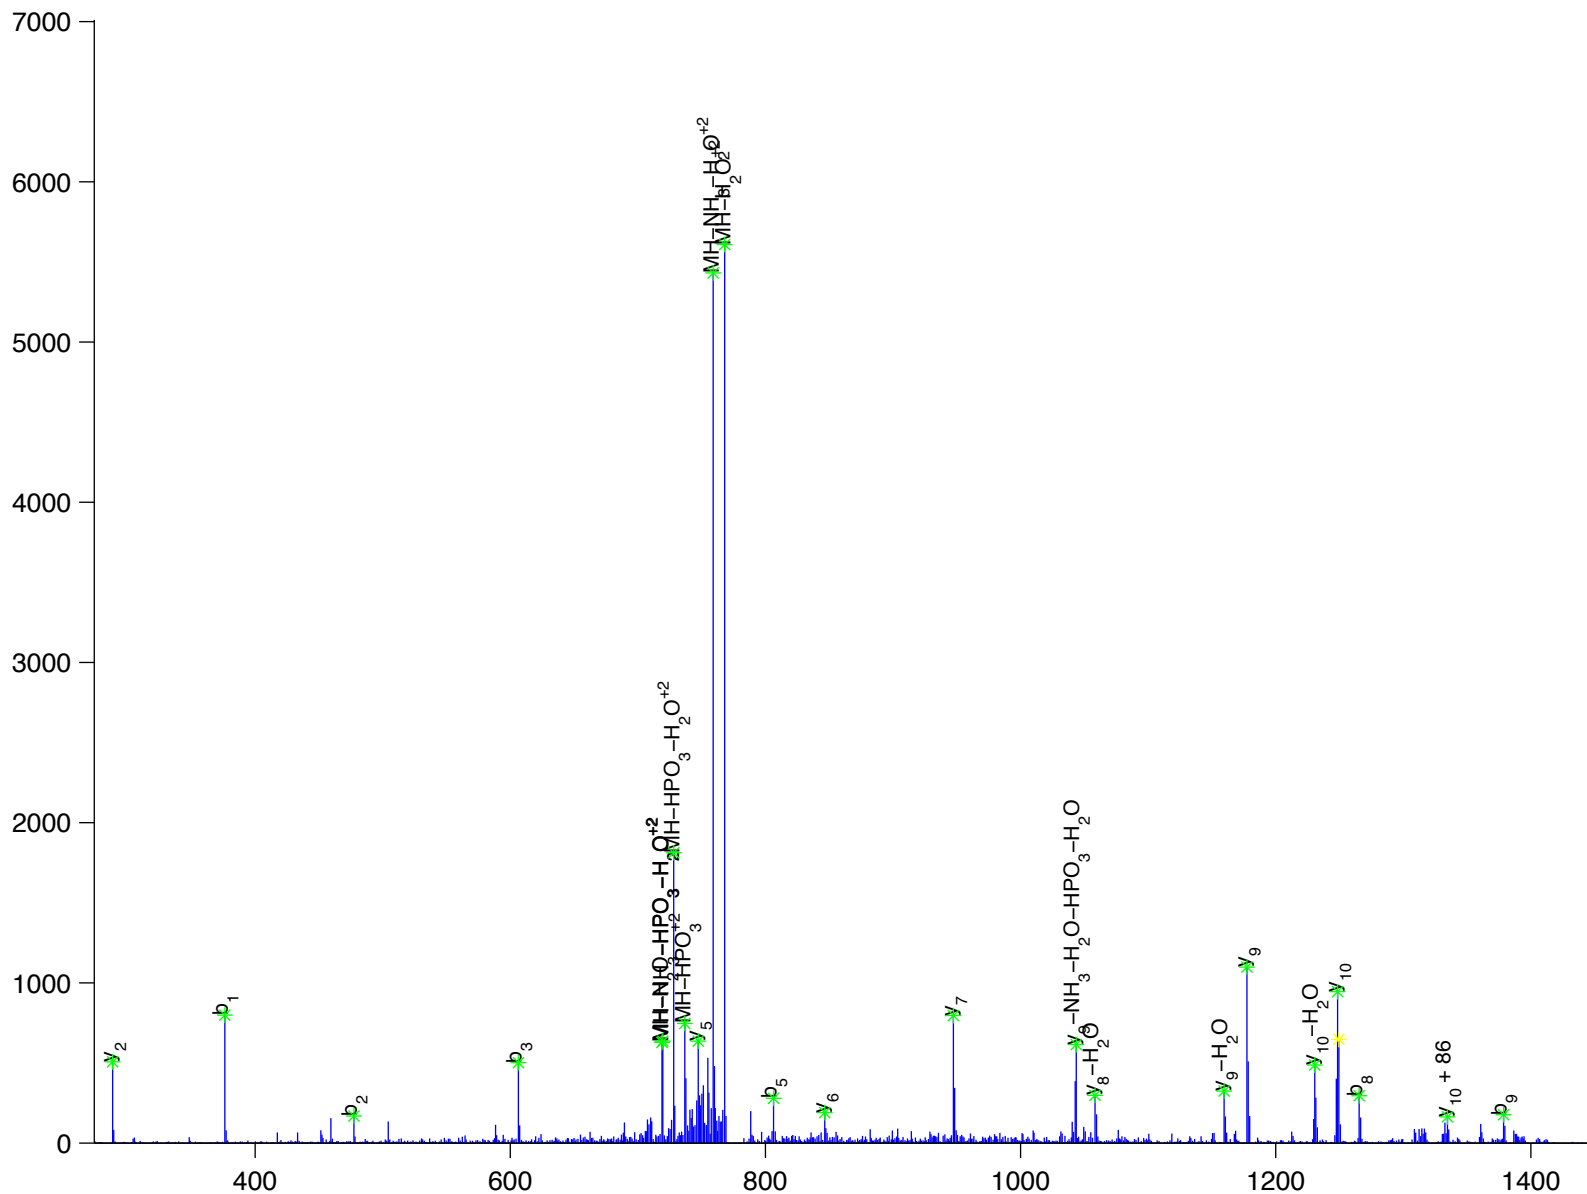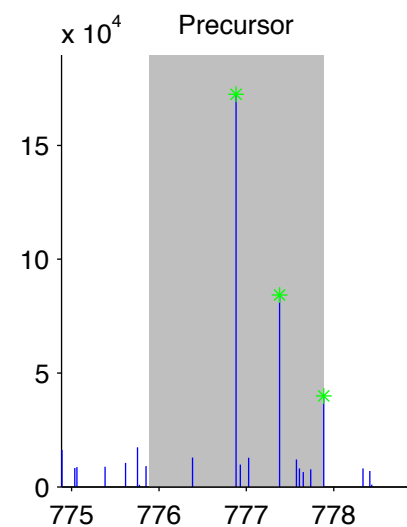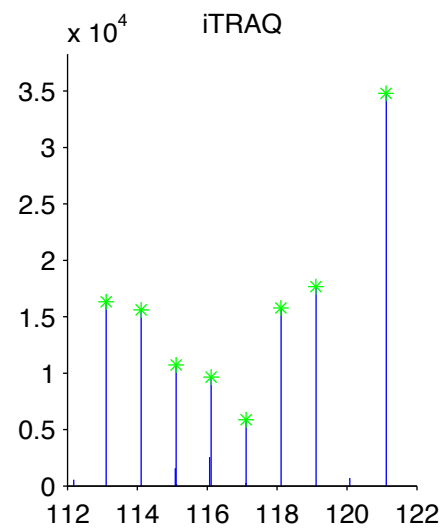



S [ A ] [ D ] [ D ] [ T ] y [ L ] [ Q ] [ L ] [ K ]

pleckstrin homology domain containing, family A member 7

Charge State: +3

Scan Number: 4136

File Name: 100905ptp1blivers\_ncHFD\_basal.raw

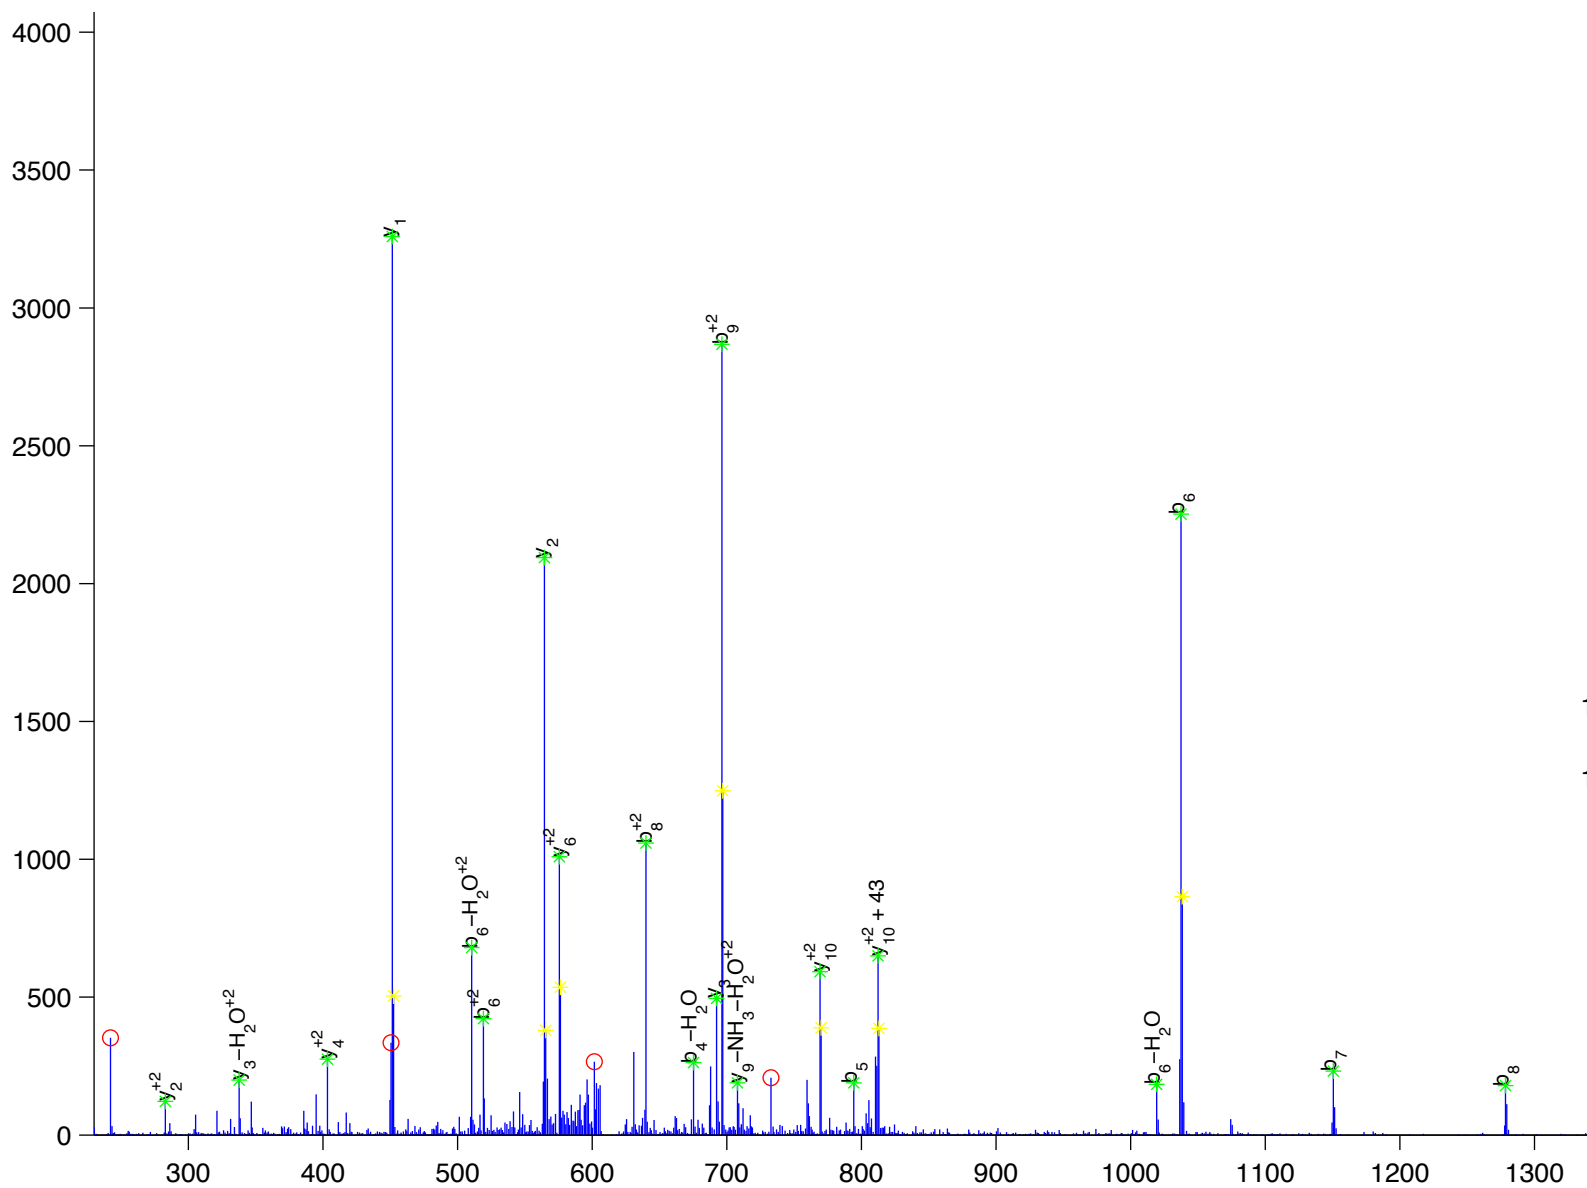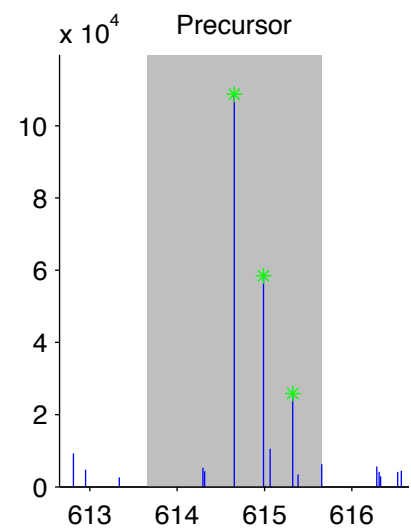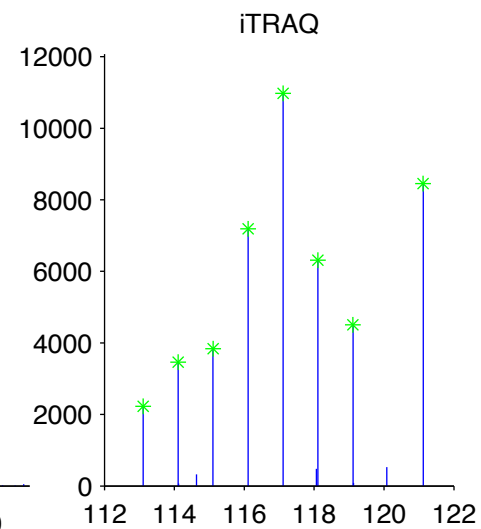

D L E y L D L K

pleckstrin homology domain containing, family A member 7

Charge State: +3

Scan Number: 4854

File Name: 100827ptp1blivers\_ncHFD\_basal.raw

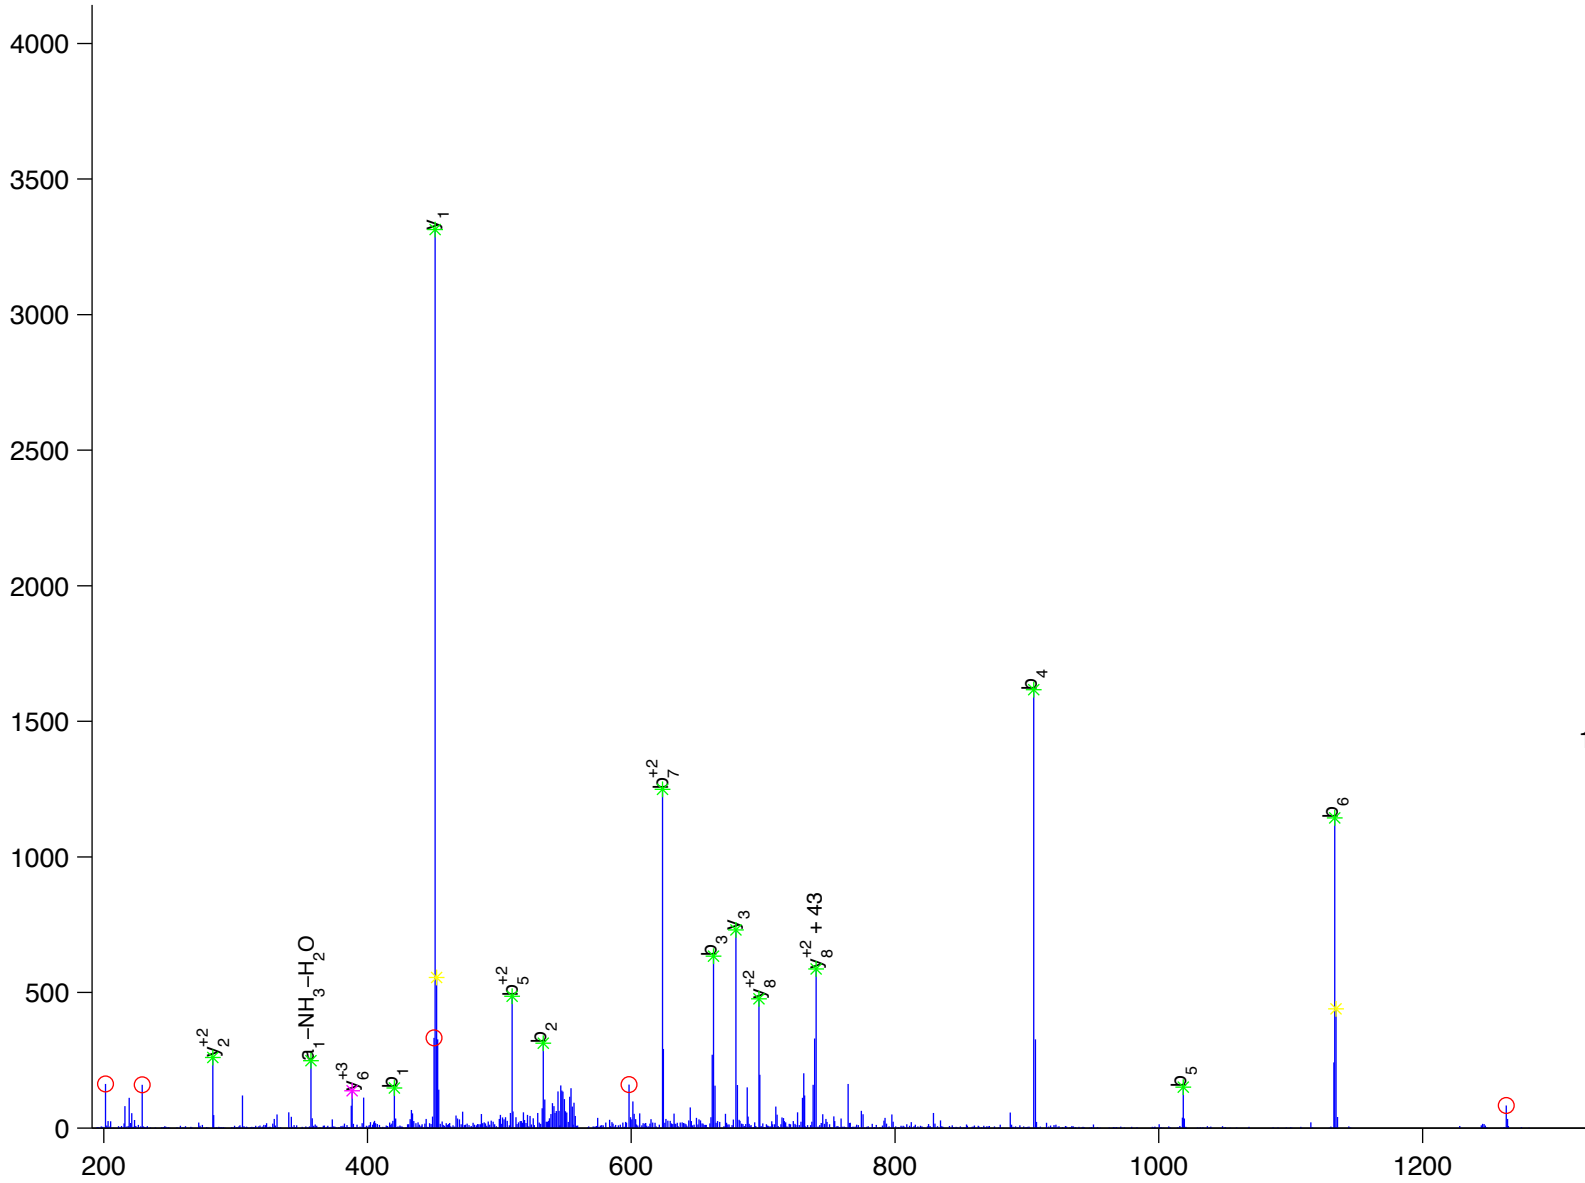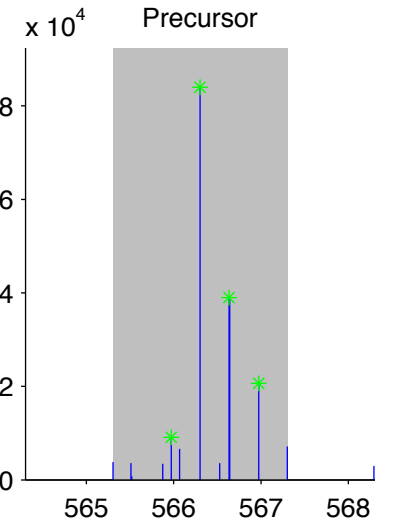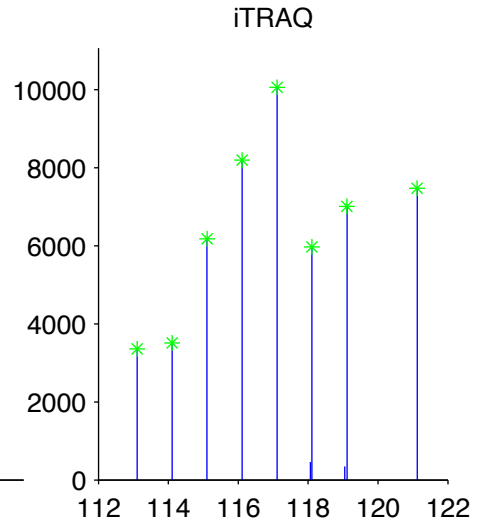





E [ G ] E [ E ] P [ T ] V [ y ] S [ D ] D [ E ] E [ P ] K [ D ] E [ T ] A [ ] R

progesterone receptor membrane component

Charge State: +4

Scan Number: 2863

File Name: 100827ptp1blivers\_ncHFD\_basal.raw

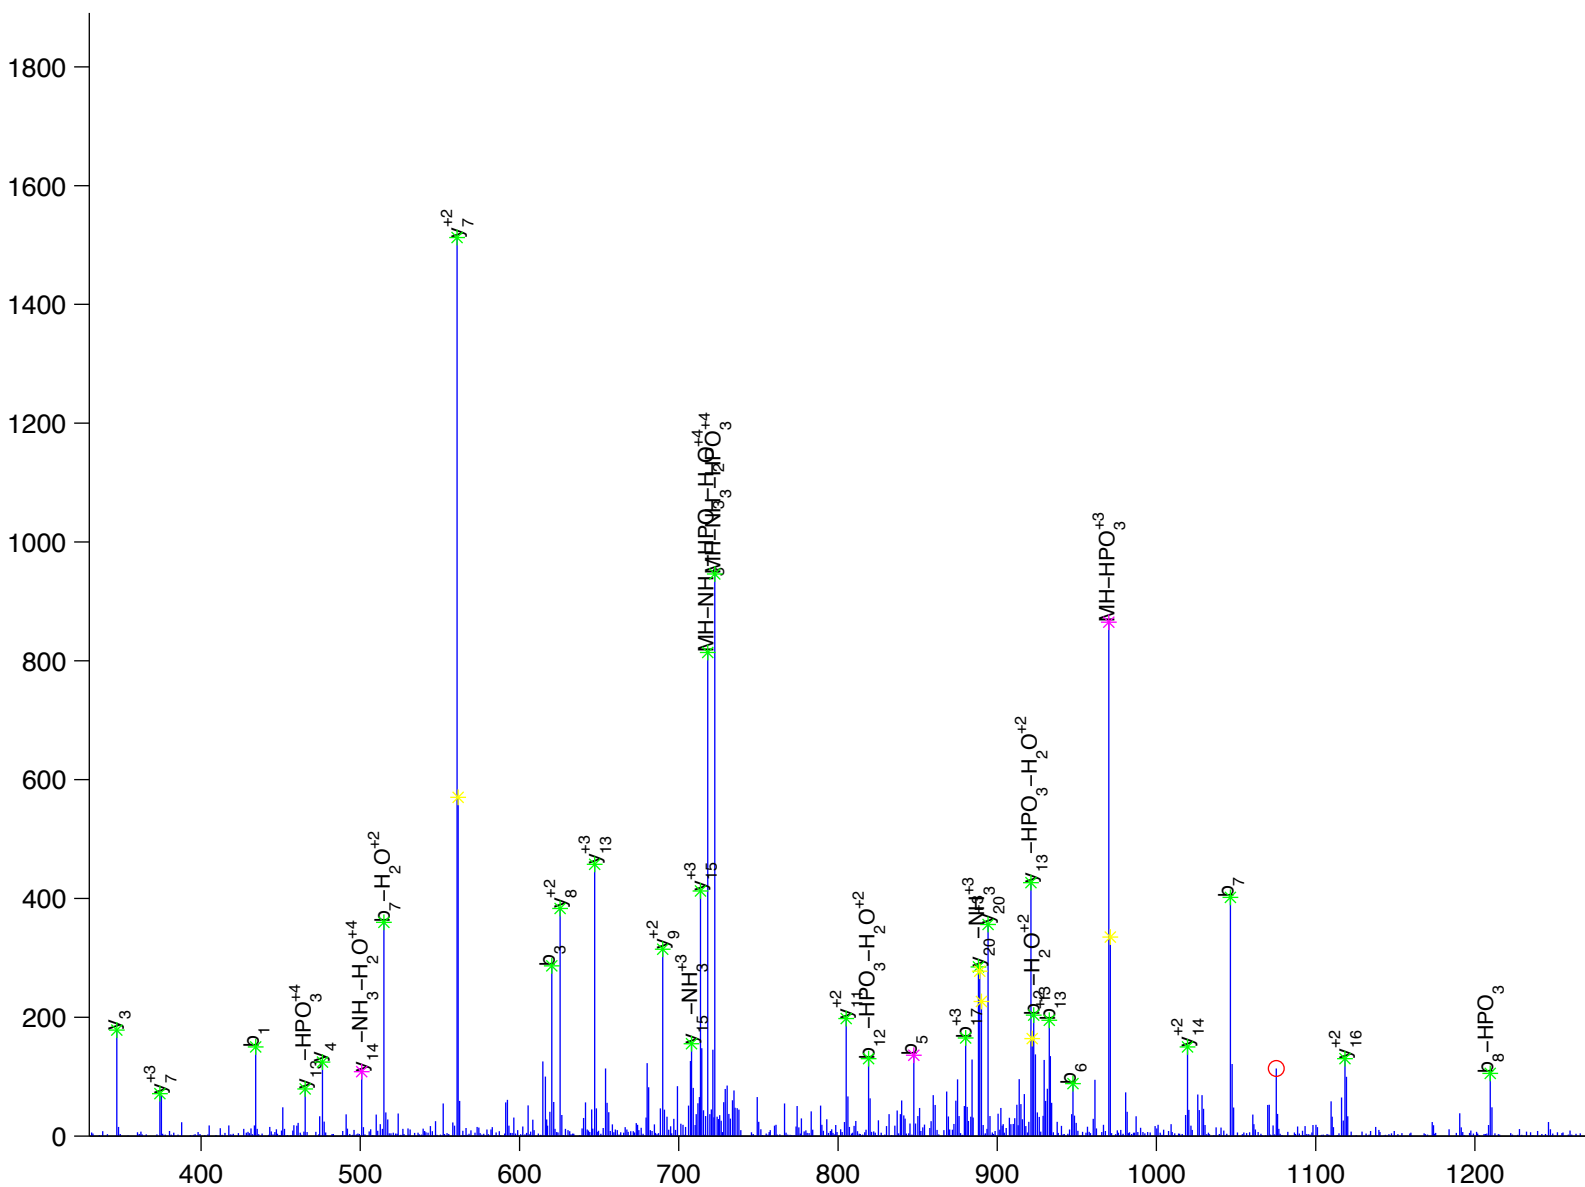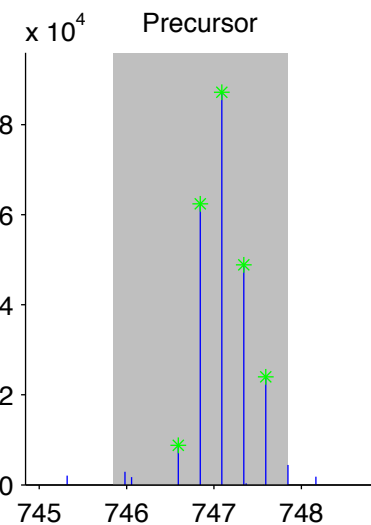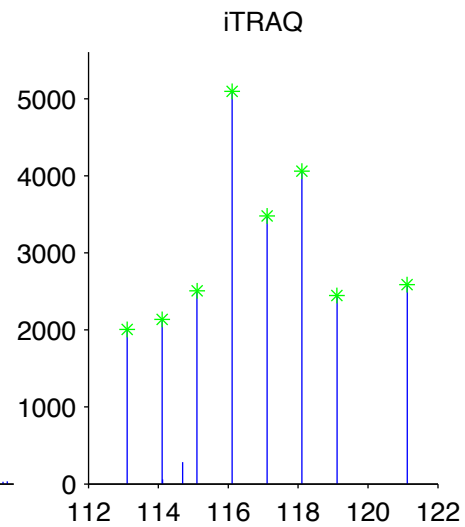

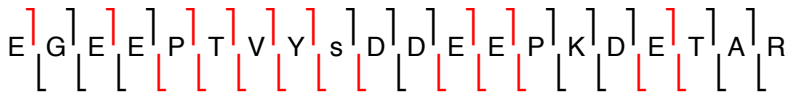

progesterone receptor membrane component

Charge State: +4

Scan Number: 2863

File Name: 100827ptp1blivers\_ncHFD\_basal.raw

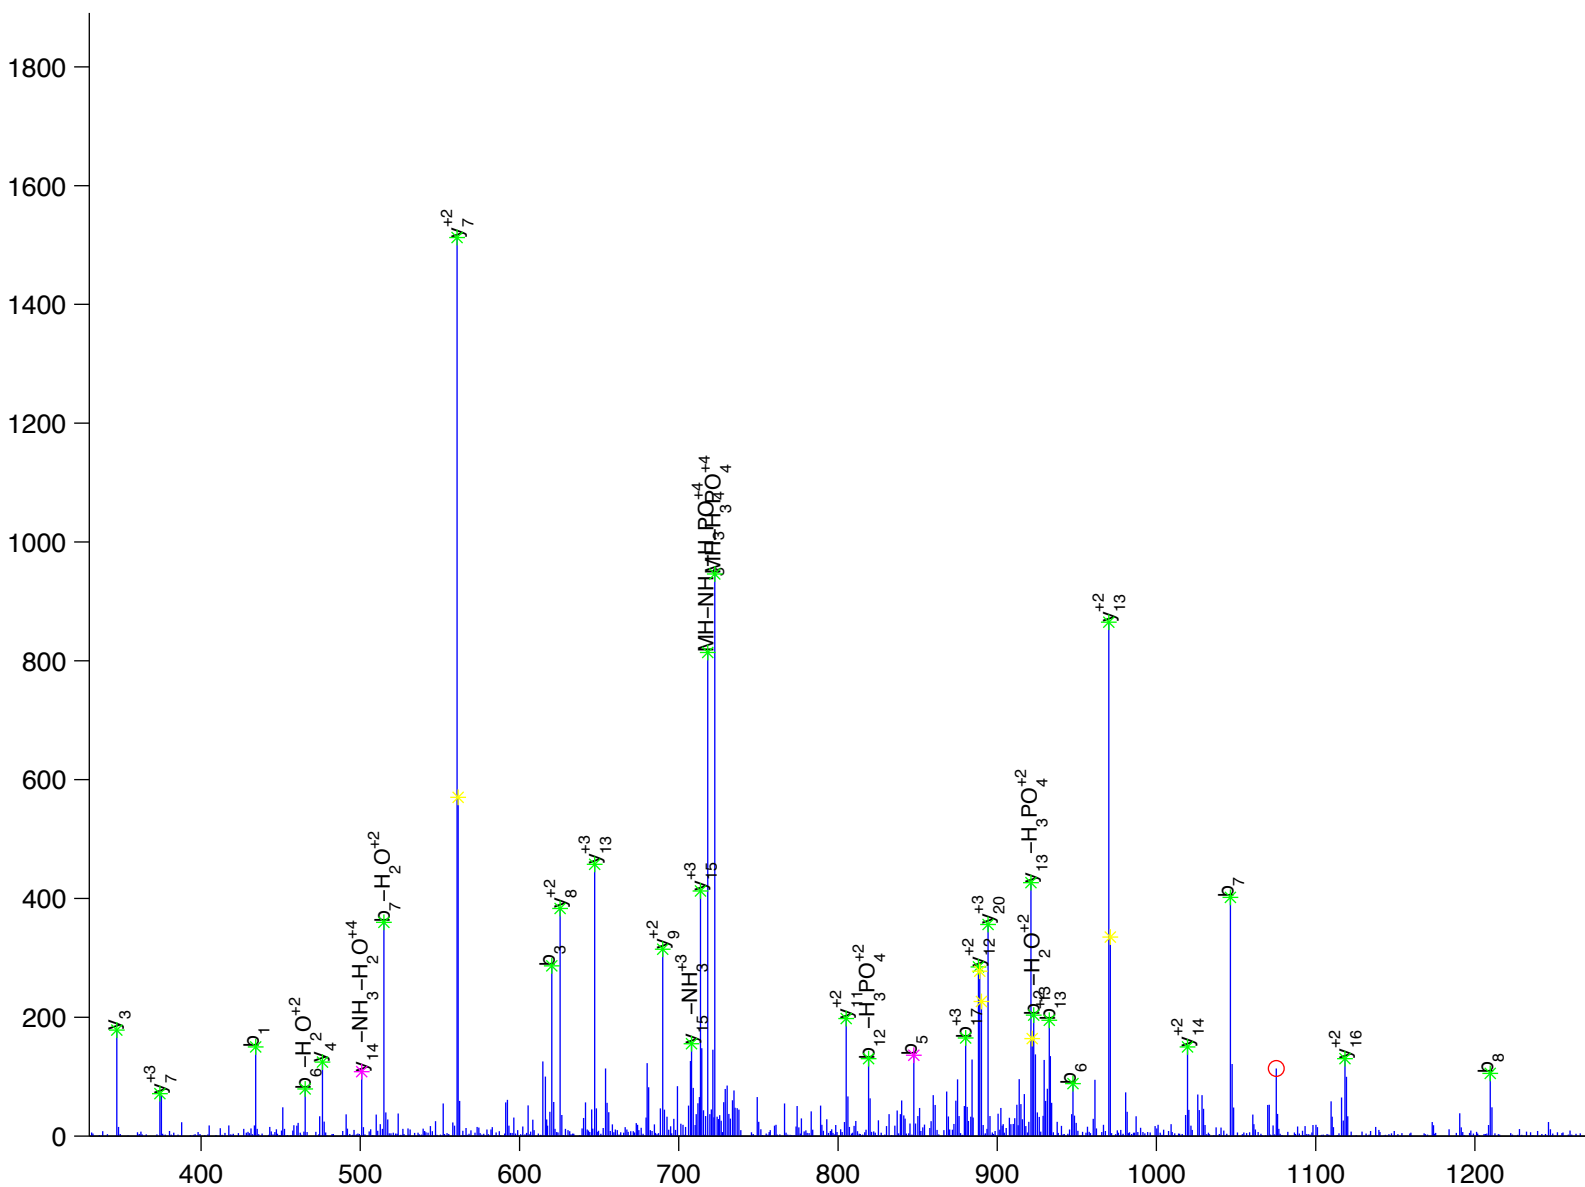



T [ F ] [ G ] [ E ] [ N ] y [ V ] [ Q ] [ E ] [ L ] [ L ] [ E ] K

proline synthetase co-transcribed isoform a

Charge State: +3

Scan Number: 11729

File Name: 090807ptp1blivers\_M\_HFD\_basal.raw

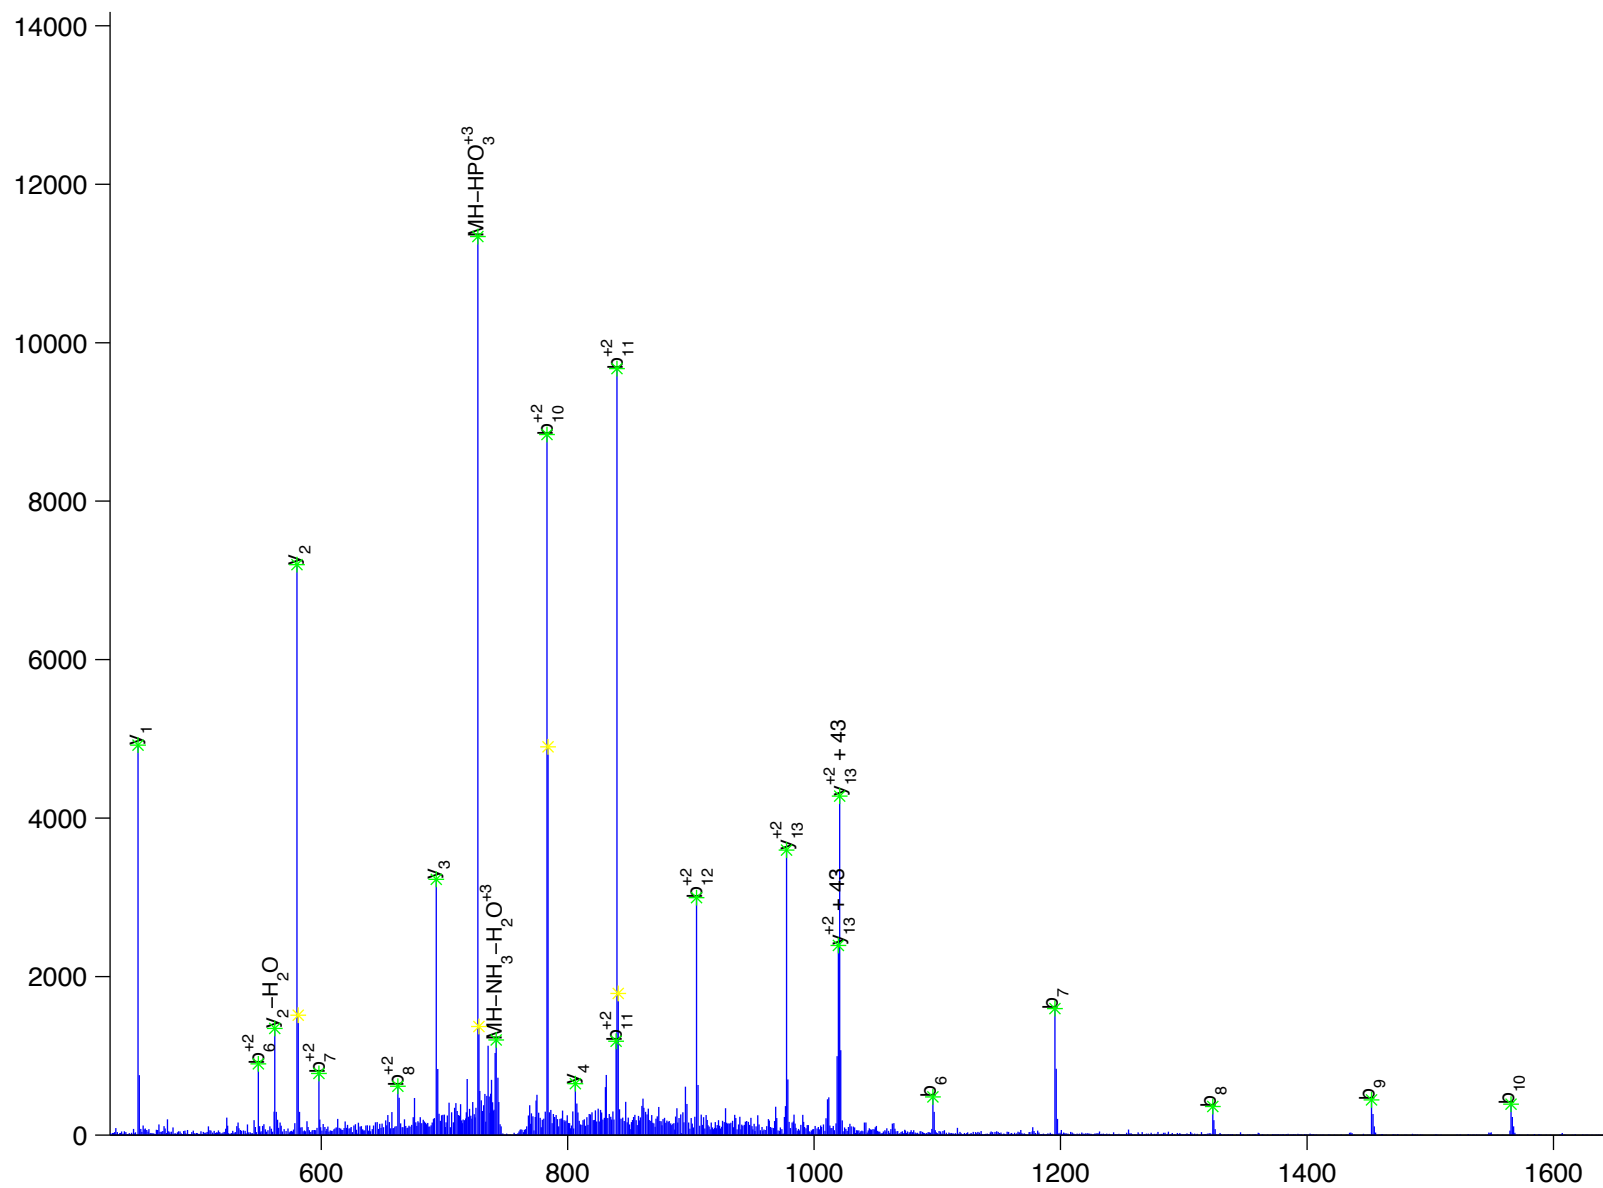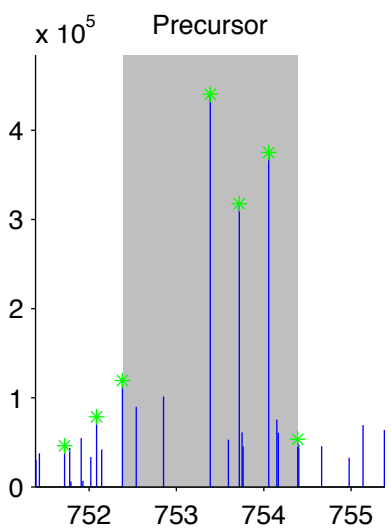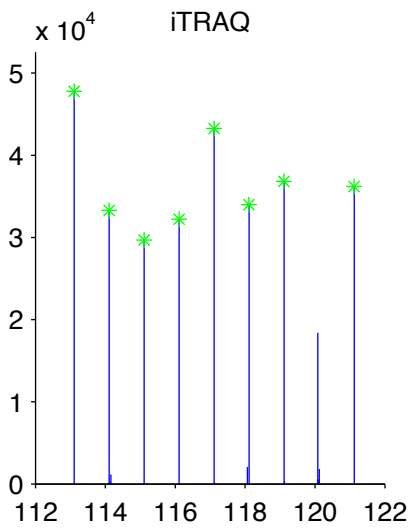



S  
I  
L  
y  
D  
E  
R

proteasome (prosome, macropain) subunit, alpha type 2

Charge State: +2

Scan Number: 4451

File Name: 090806ptp1blivers\_M\_NC2.raw

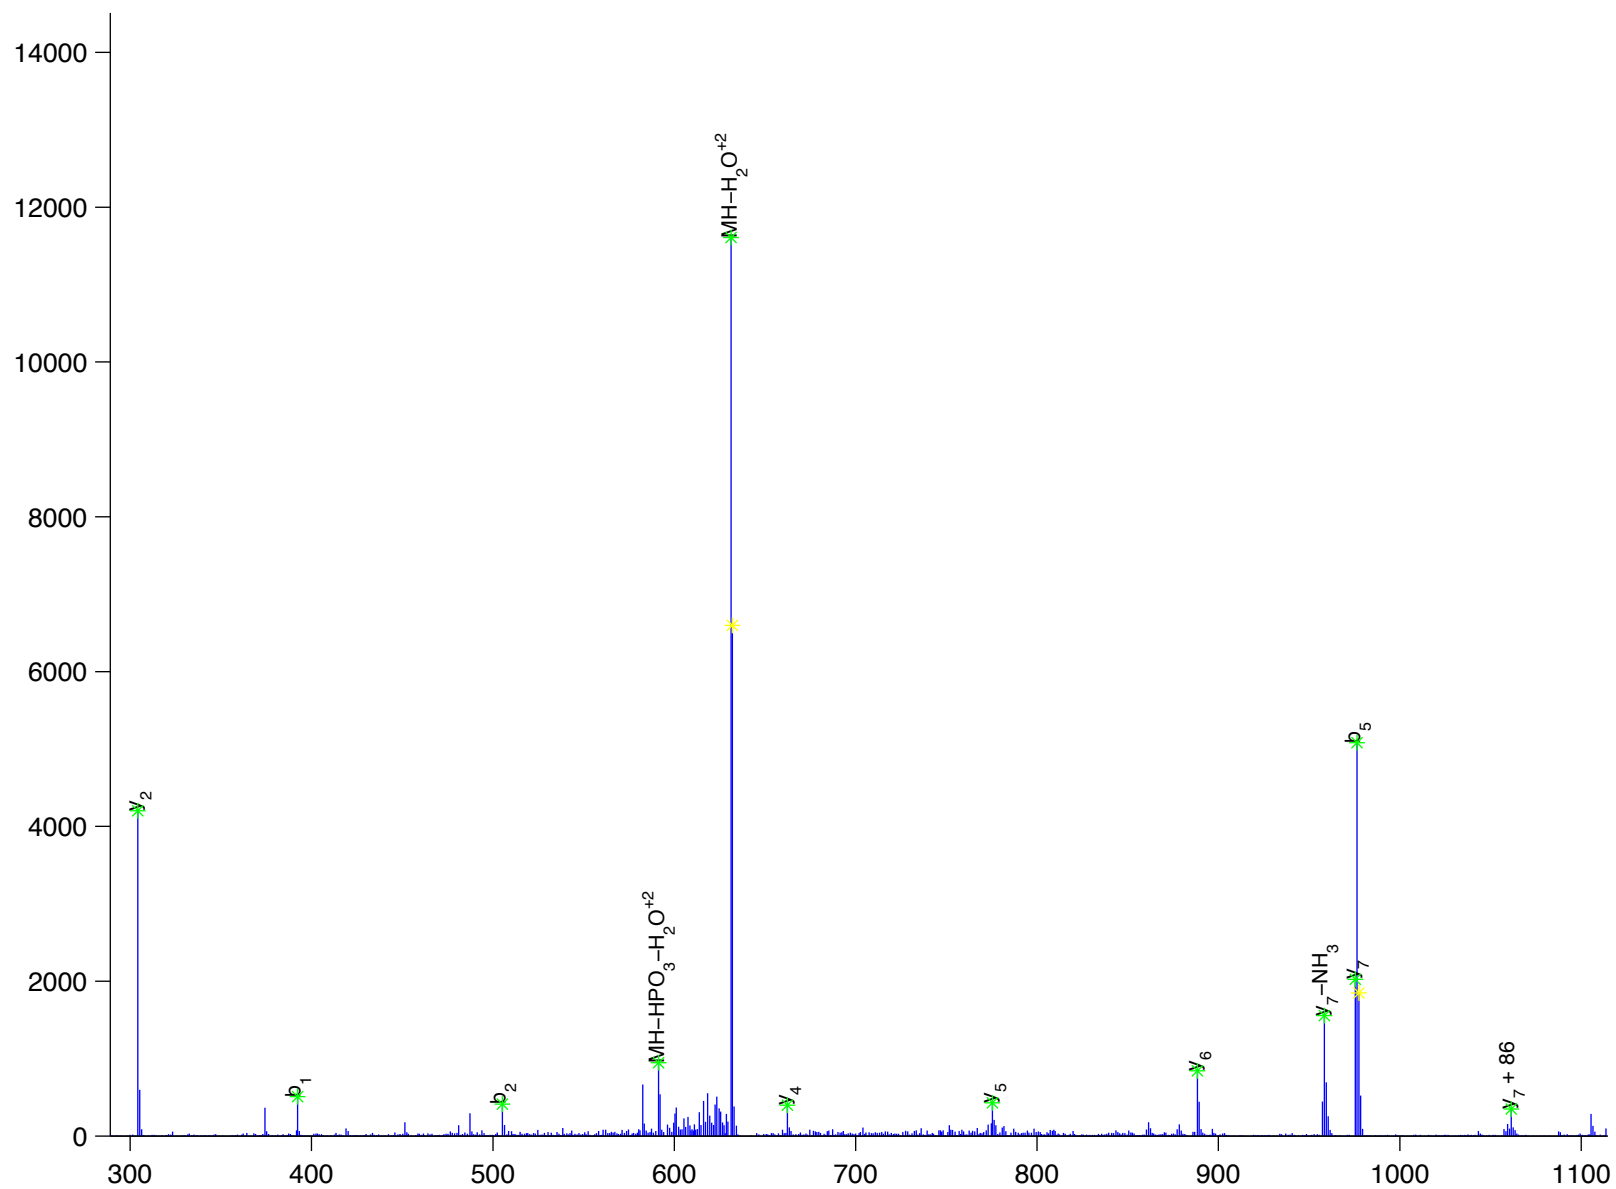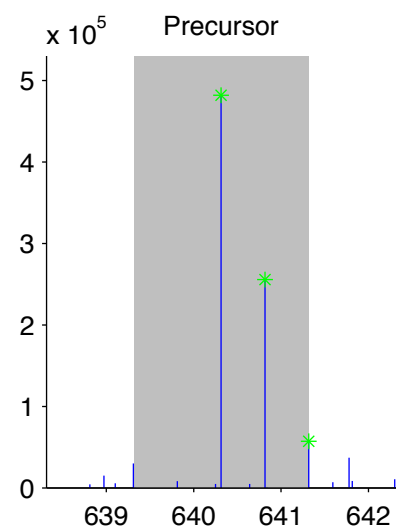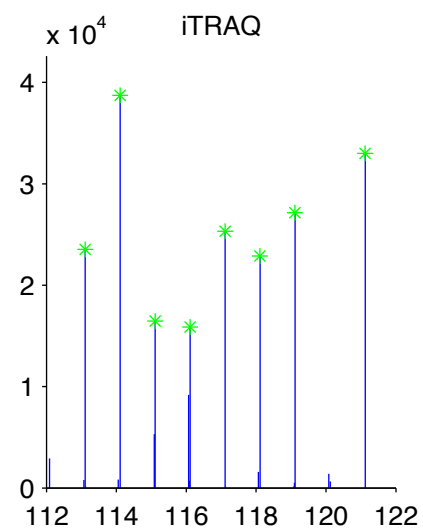

V [ y ] E [ N ] V [ G ] L [ M ] Q [ Q ] Q [ R ]

protein tyrosine phosphatase, non-receptor type 11

Charge State: +2

Scan Number: 284

File Name: HJ072909\_HFD\_E1\_2.raw

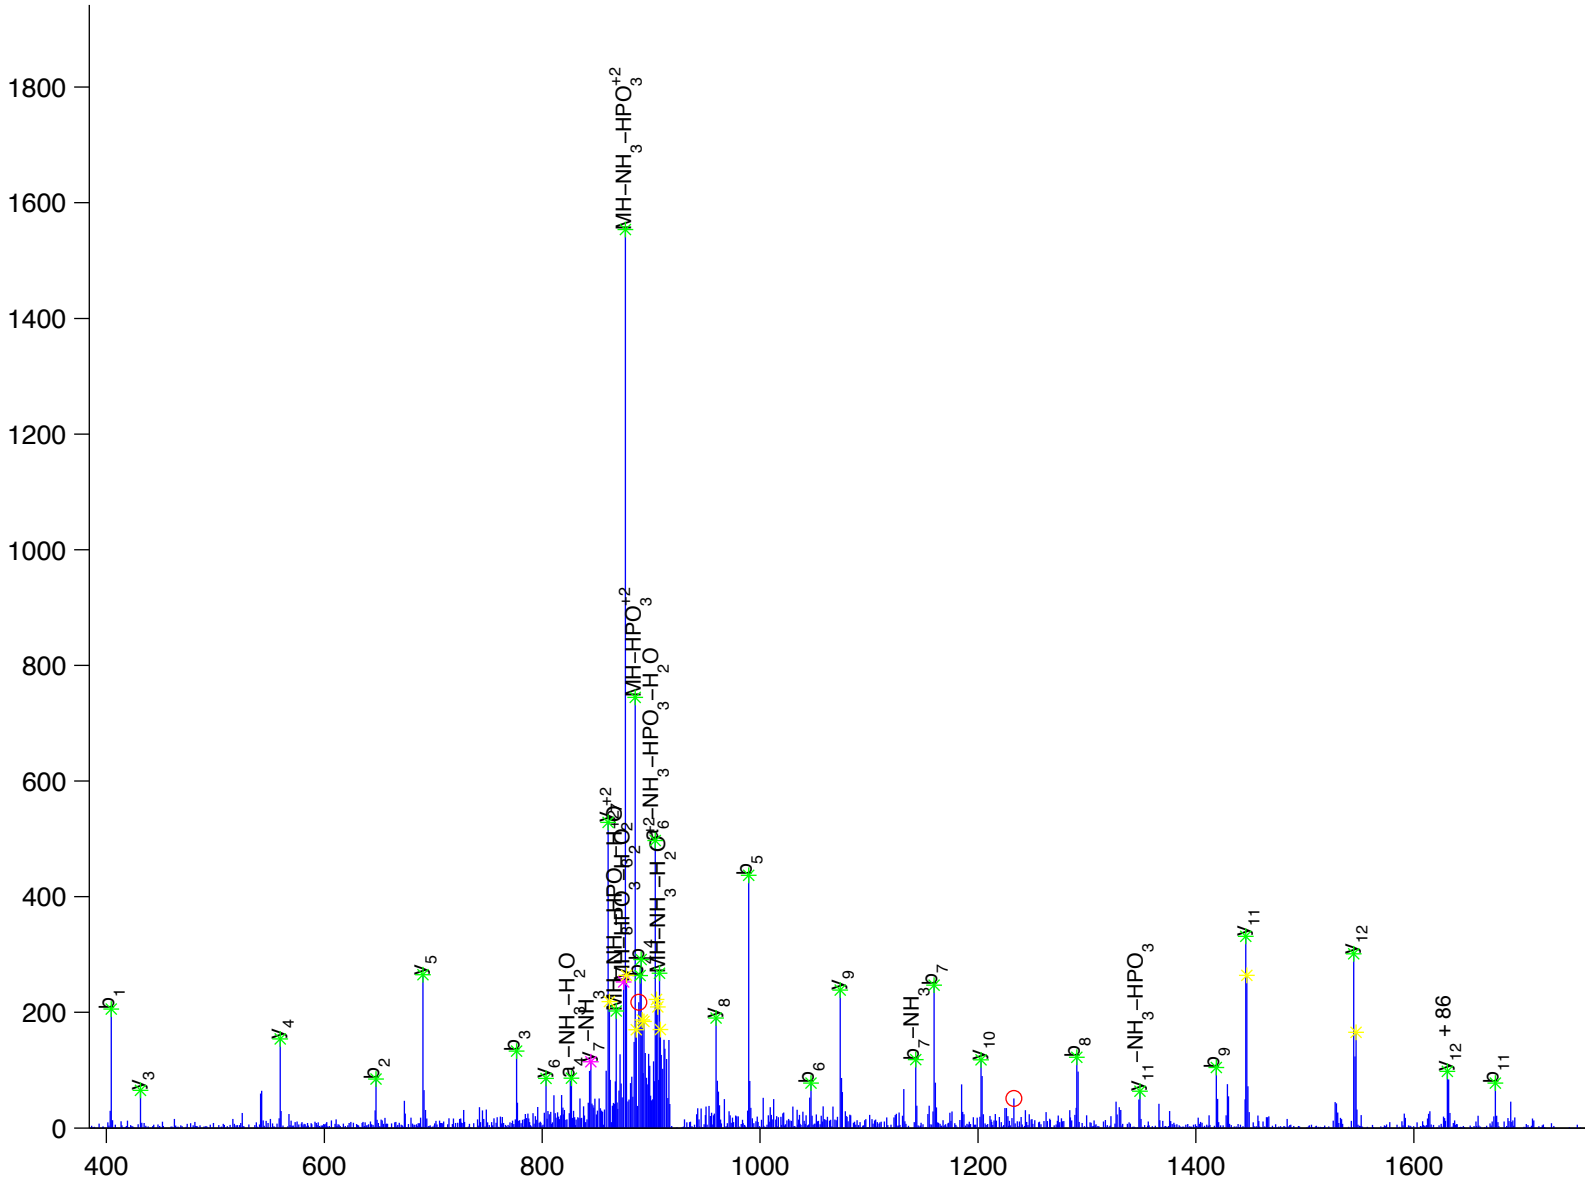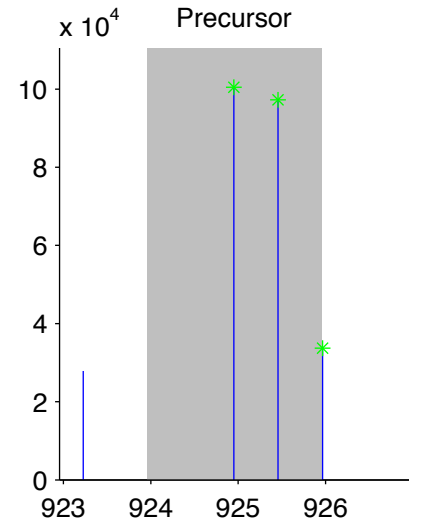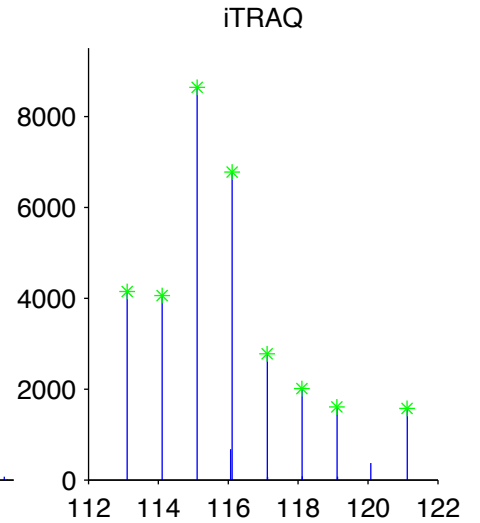

I [Q] N [T] G [D] y Y [D] L [Y] G [G] E [K]

protein tyrosine phosphatase, non-receptor type 11

Charge State: +3

Scan Number: 4678

File Name: 100905ptp1blivers\_ncHFD\_basal.raw

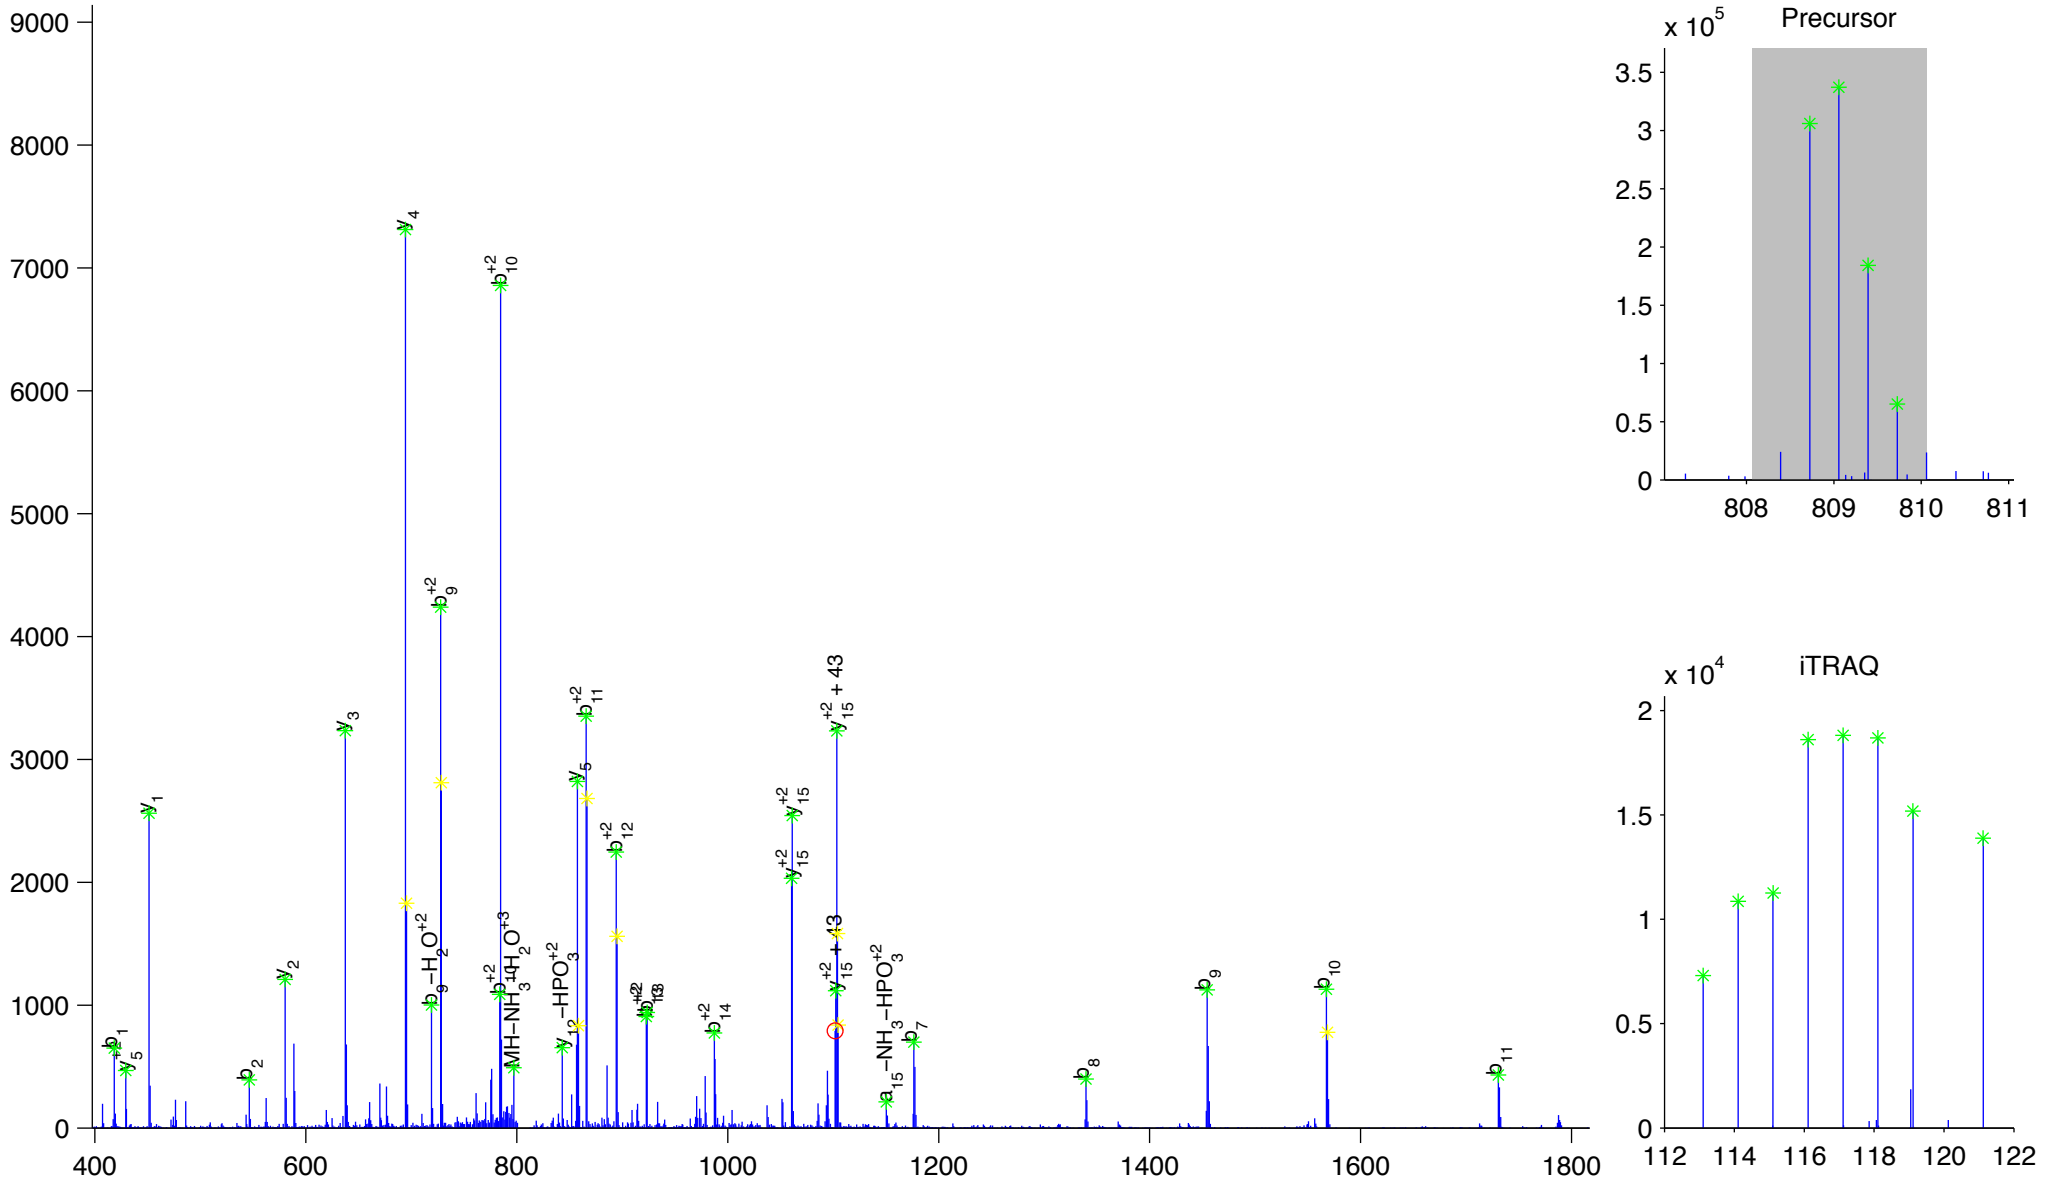

V V Q E Y I D A F S D y A N F

protein tyrosine phosphatase, receptor type, A

Charge State: +3

Scan Number: 13649

File Name: 090807ptp1blivers\_M\_HFD\_basal.raw

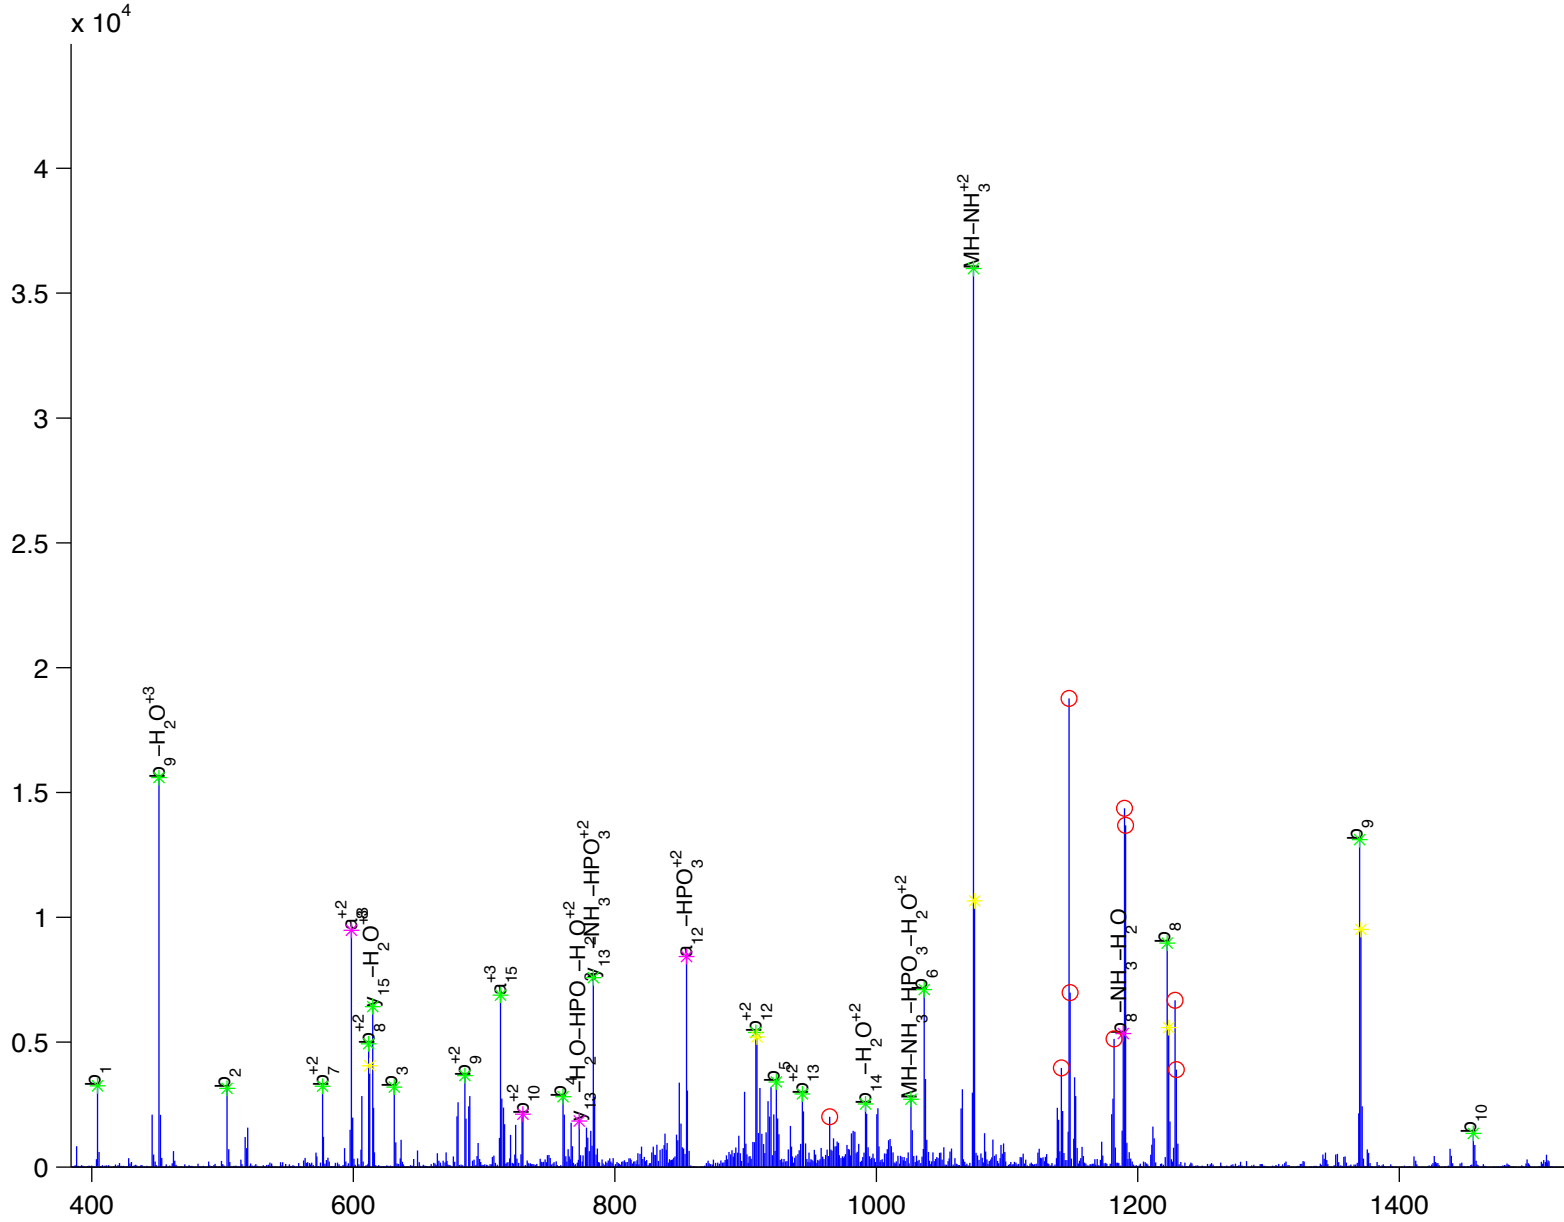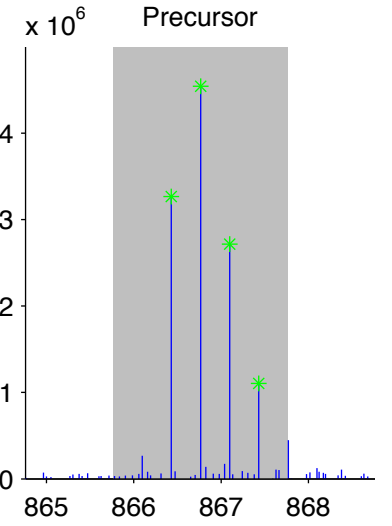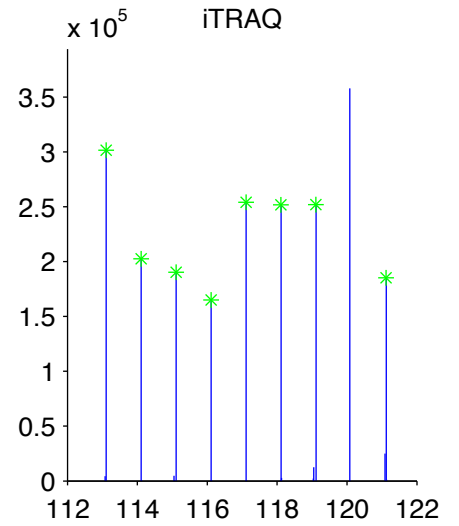



L [ C ] D [ F ] G [ S ] A [ S ] H [ V ] A [ D ] N [ D ] I [ T ] P [ y ] L [ V ] S [ R ]

PRP4 pre-mRNA processing factor 4 homolog B

Charge State: +4

Scan Number: 7142

File Name: 091130ptp1blivers\_hfd\_basal2.raw

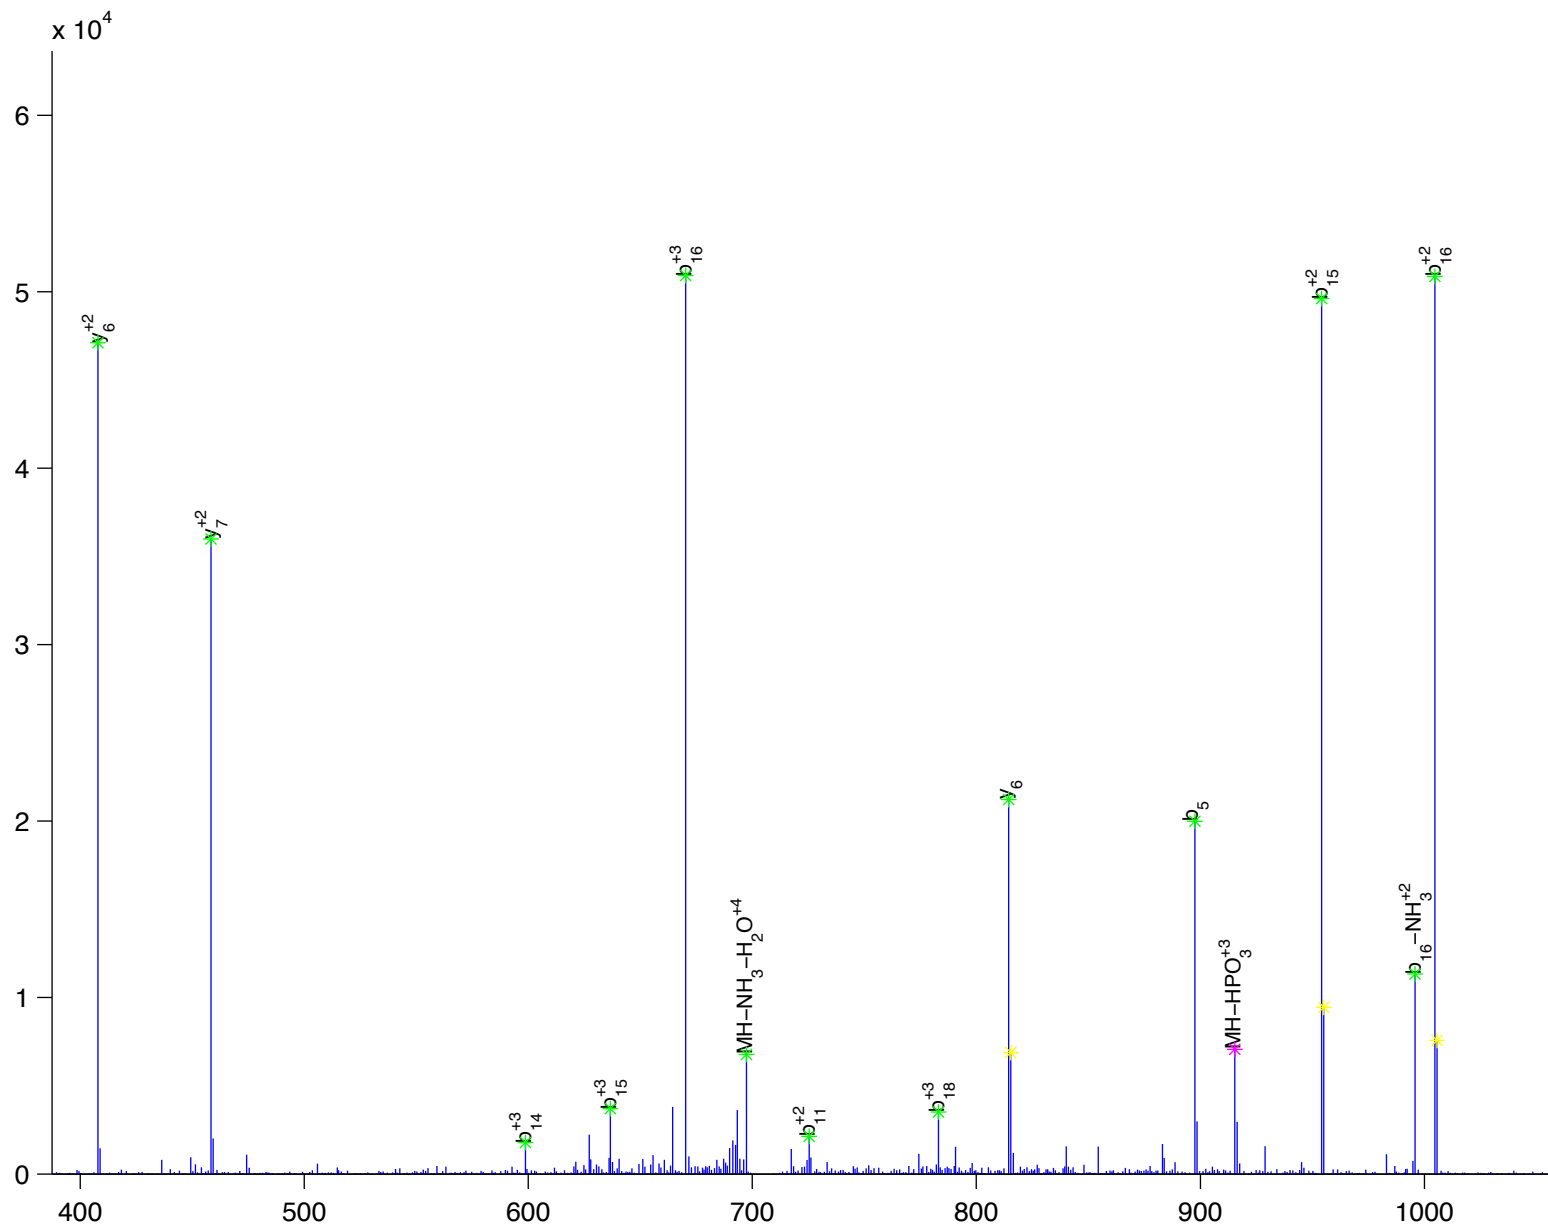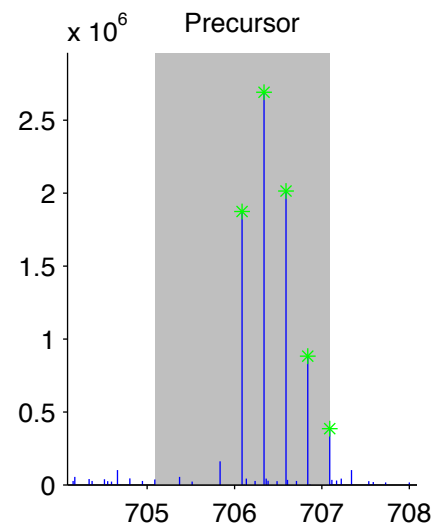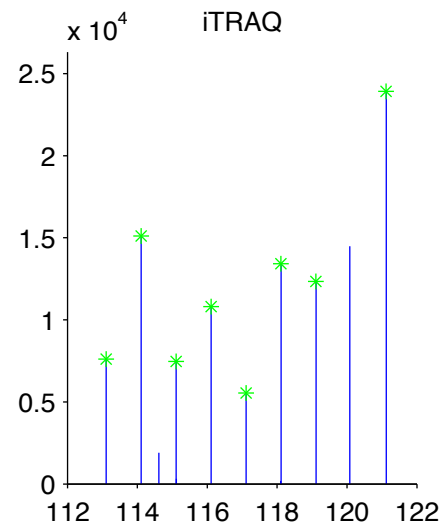

L [D] [H] [H] [P] [E] [W] [F] [N] [V] [y] [N] [K]

pterin 4 alpha carbinolamine dehydratase/dimerization cofactor of hepatocyte nuclear factor 1 alpha

Charge State: +4

Scan Number: 5661

File Name: 091130ptp1blivers\_hfd\_basal2.raw

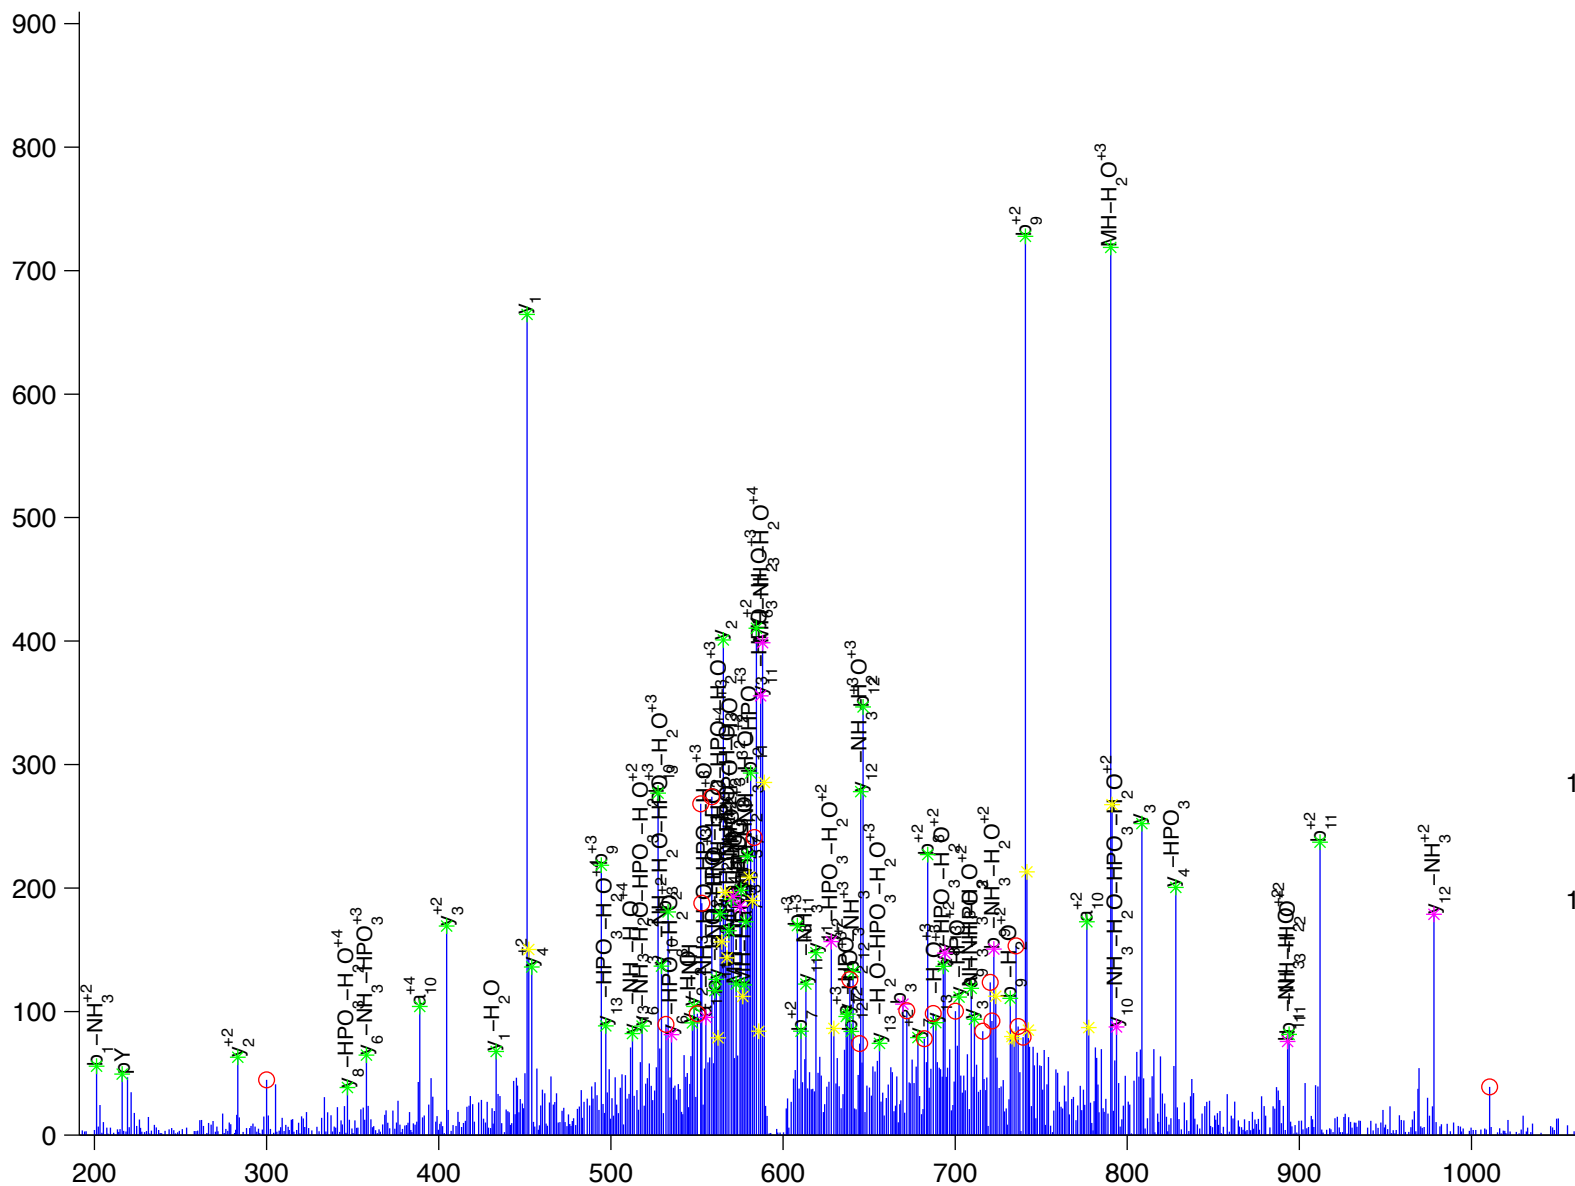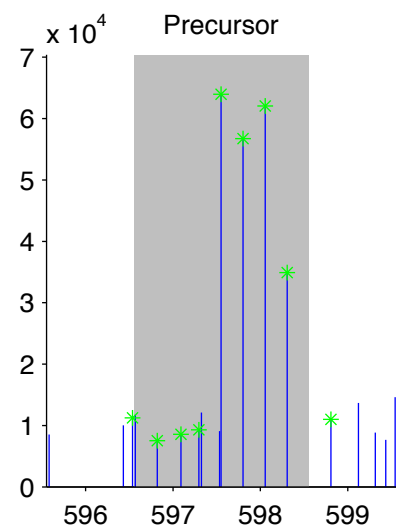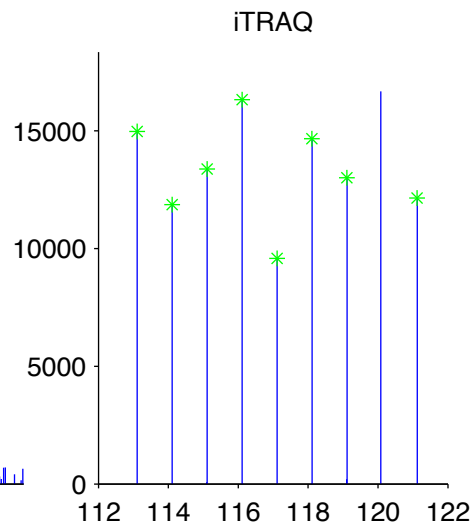

E [ D ] [ G ] [ S ] [ F ] [ Q ] [ G ] [ P ] [ T ] [ G ] [ N ] [ Q ] [ H ] [ I ] [ y ] [ Q ] [ P ] [ V ] [ G ] [ K ] [ P ] [ D ] [ P ] [ A ] [ A ] [ P ] [ P ] [ K ]

PTK2 protein tyrosine kinase 2

Charge State: +4

Scan Number: 4871

File Name: 091130ptp1blivers\_hfd\_basal2.raw

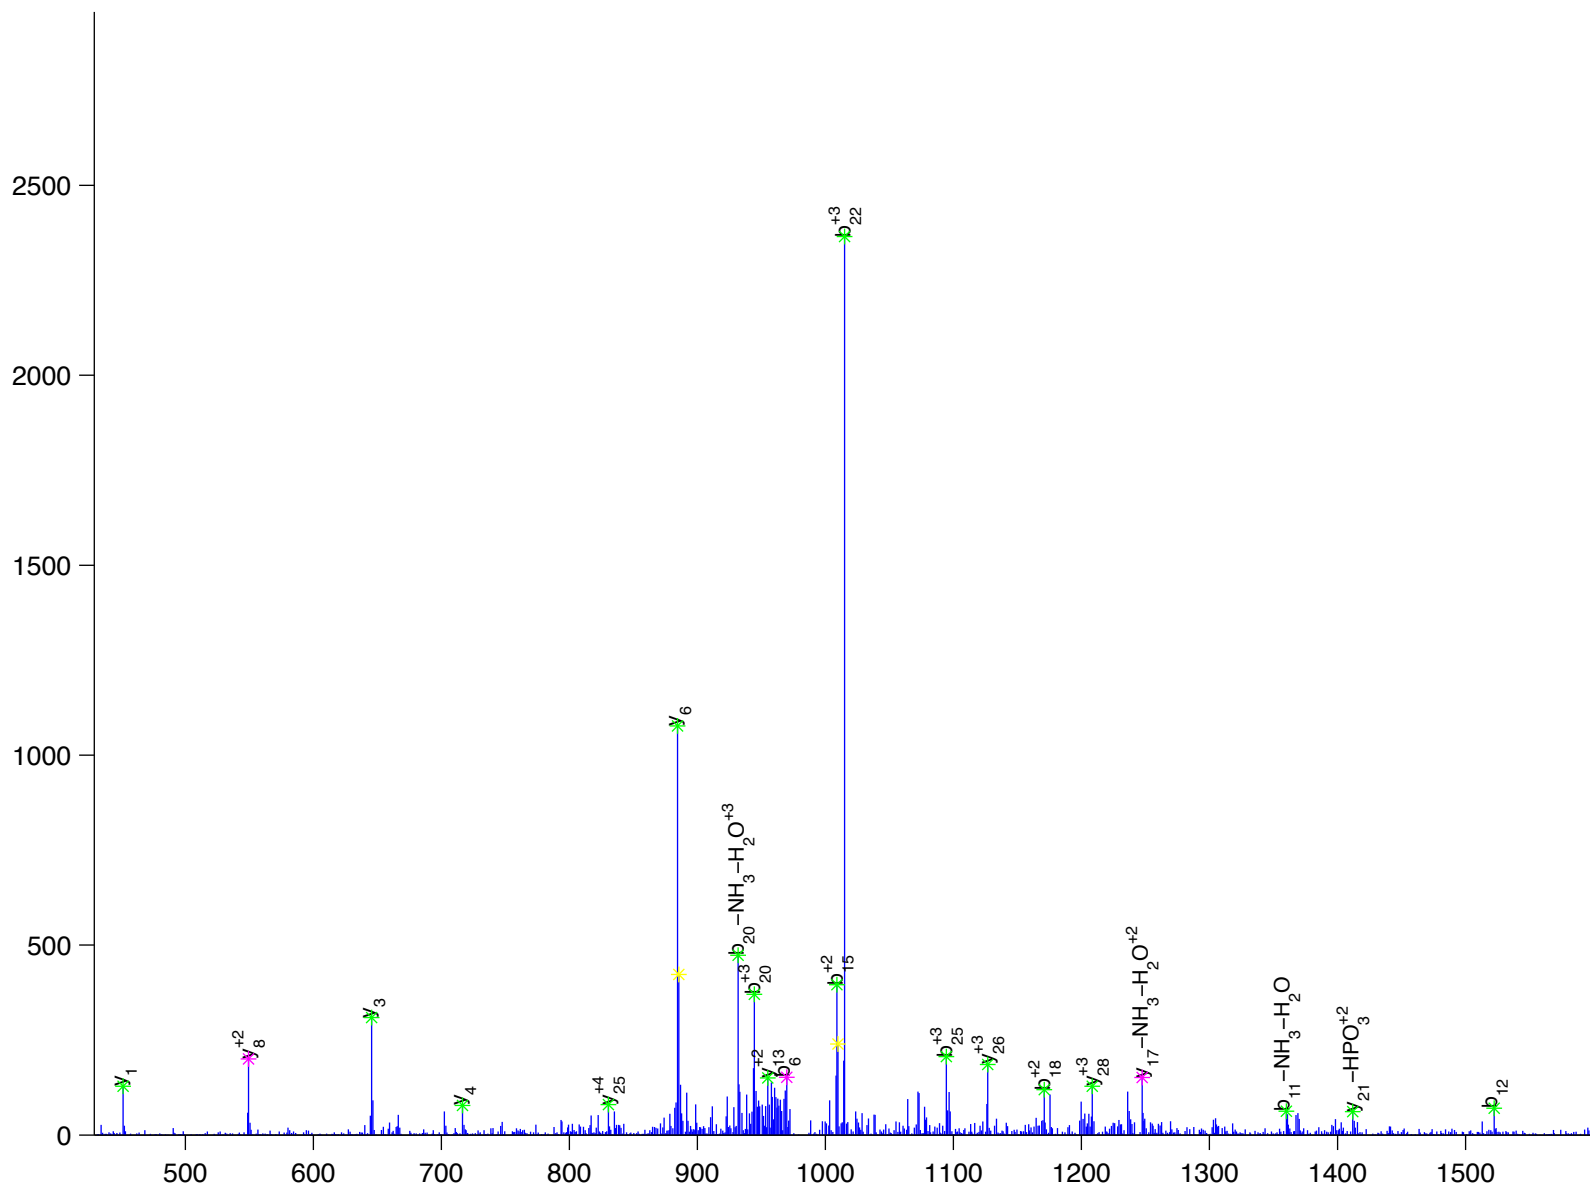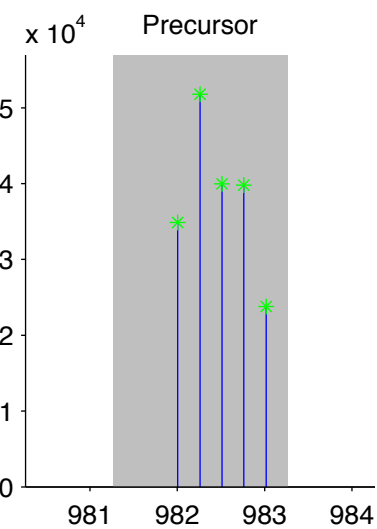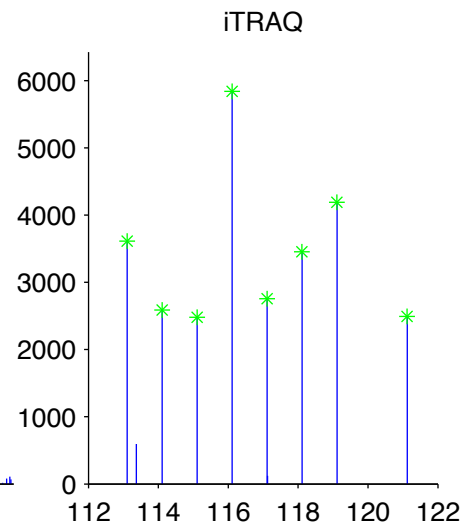



Y [ M ] [ E ] [ D ] [ s ] [ T ] [ Y ] [ y ] K

PTK2 protein tyrosine kinase 2

Charge State: +2

Scan Number: 5132

File Name: 091130ptp1blivers\_hfd\_basal2.raw

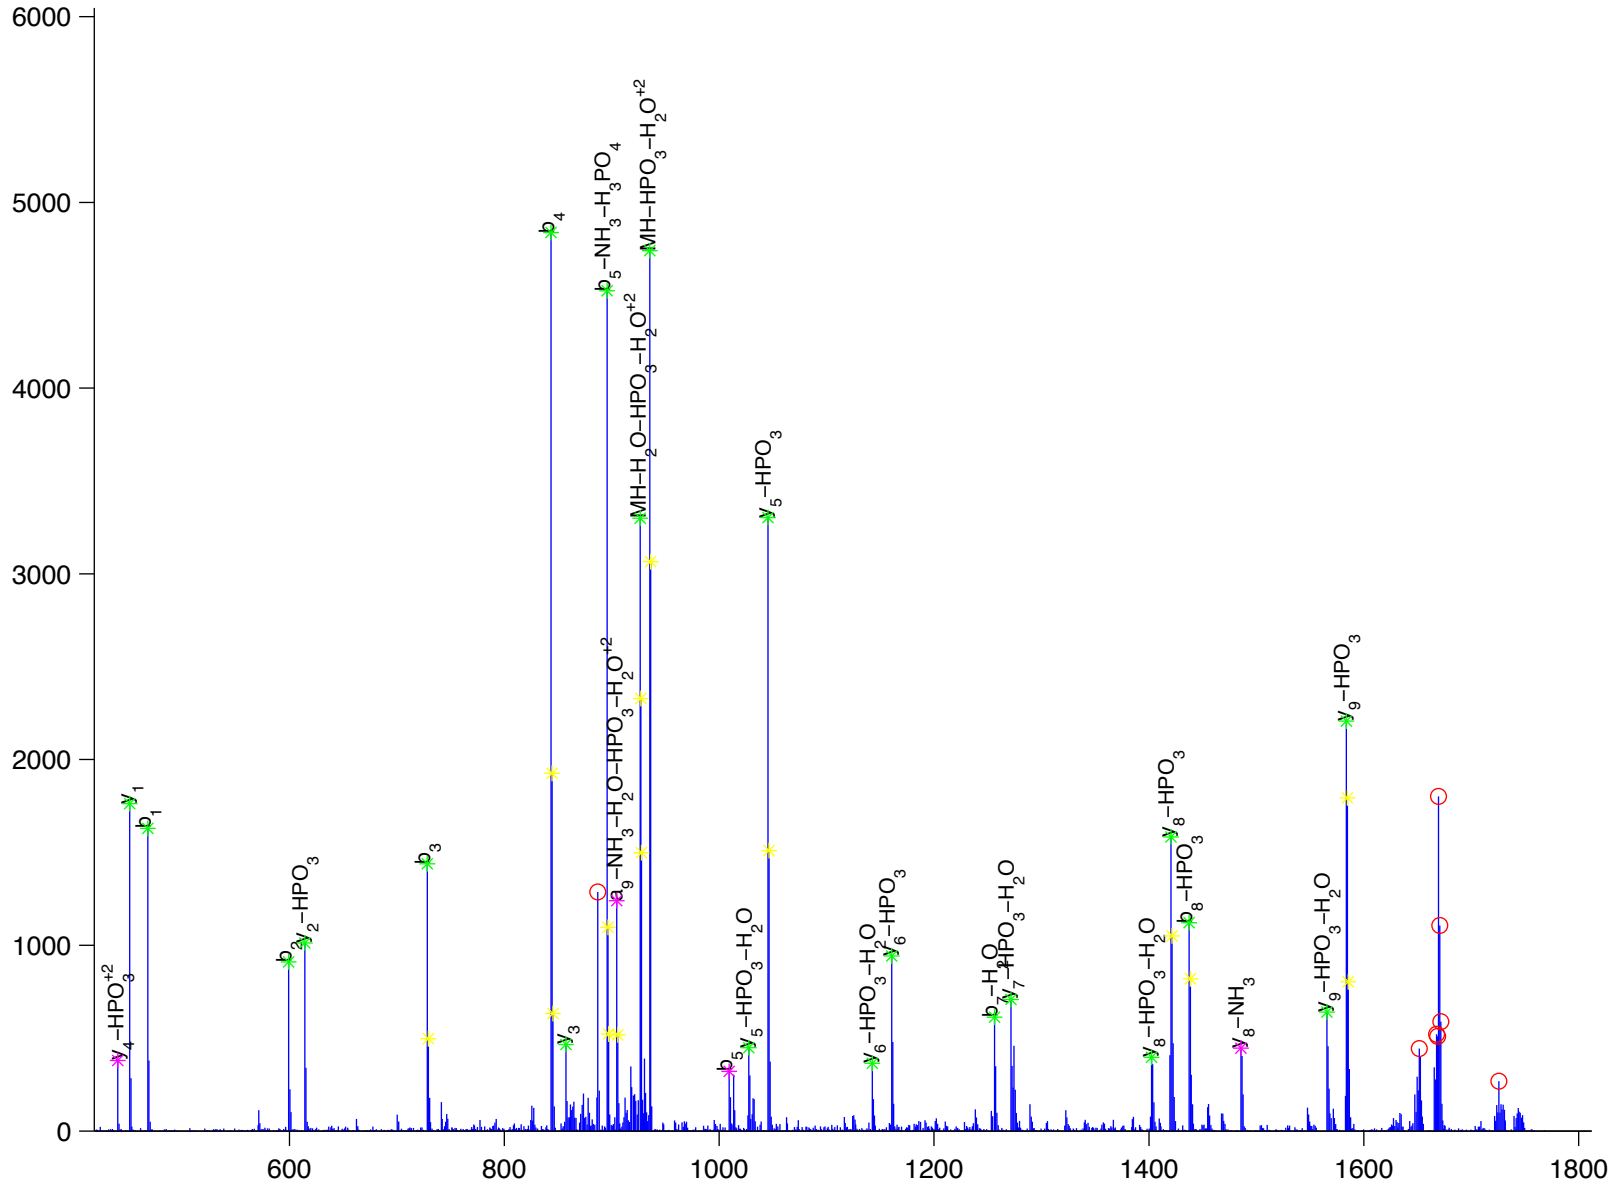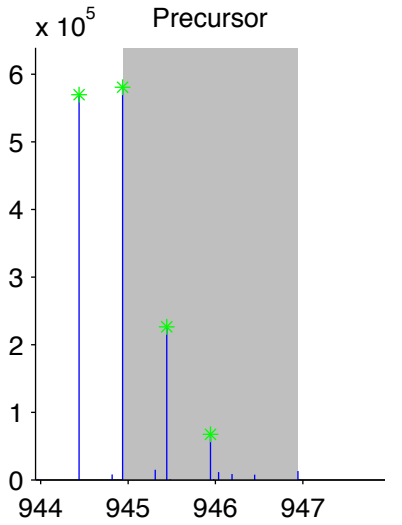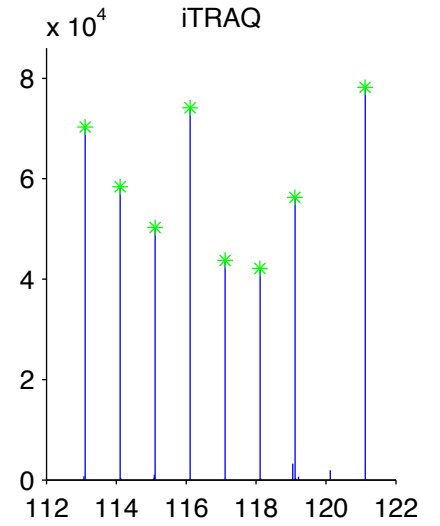

Y [ M ] E [ D ] S [ t ] Y [ y ] K

PTK2 protein tyrosine kinase 2

Charge State: +2

Scan Number: 5132

File Name: 091130ptp1blivers\_hfd\_basal2.raw

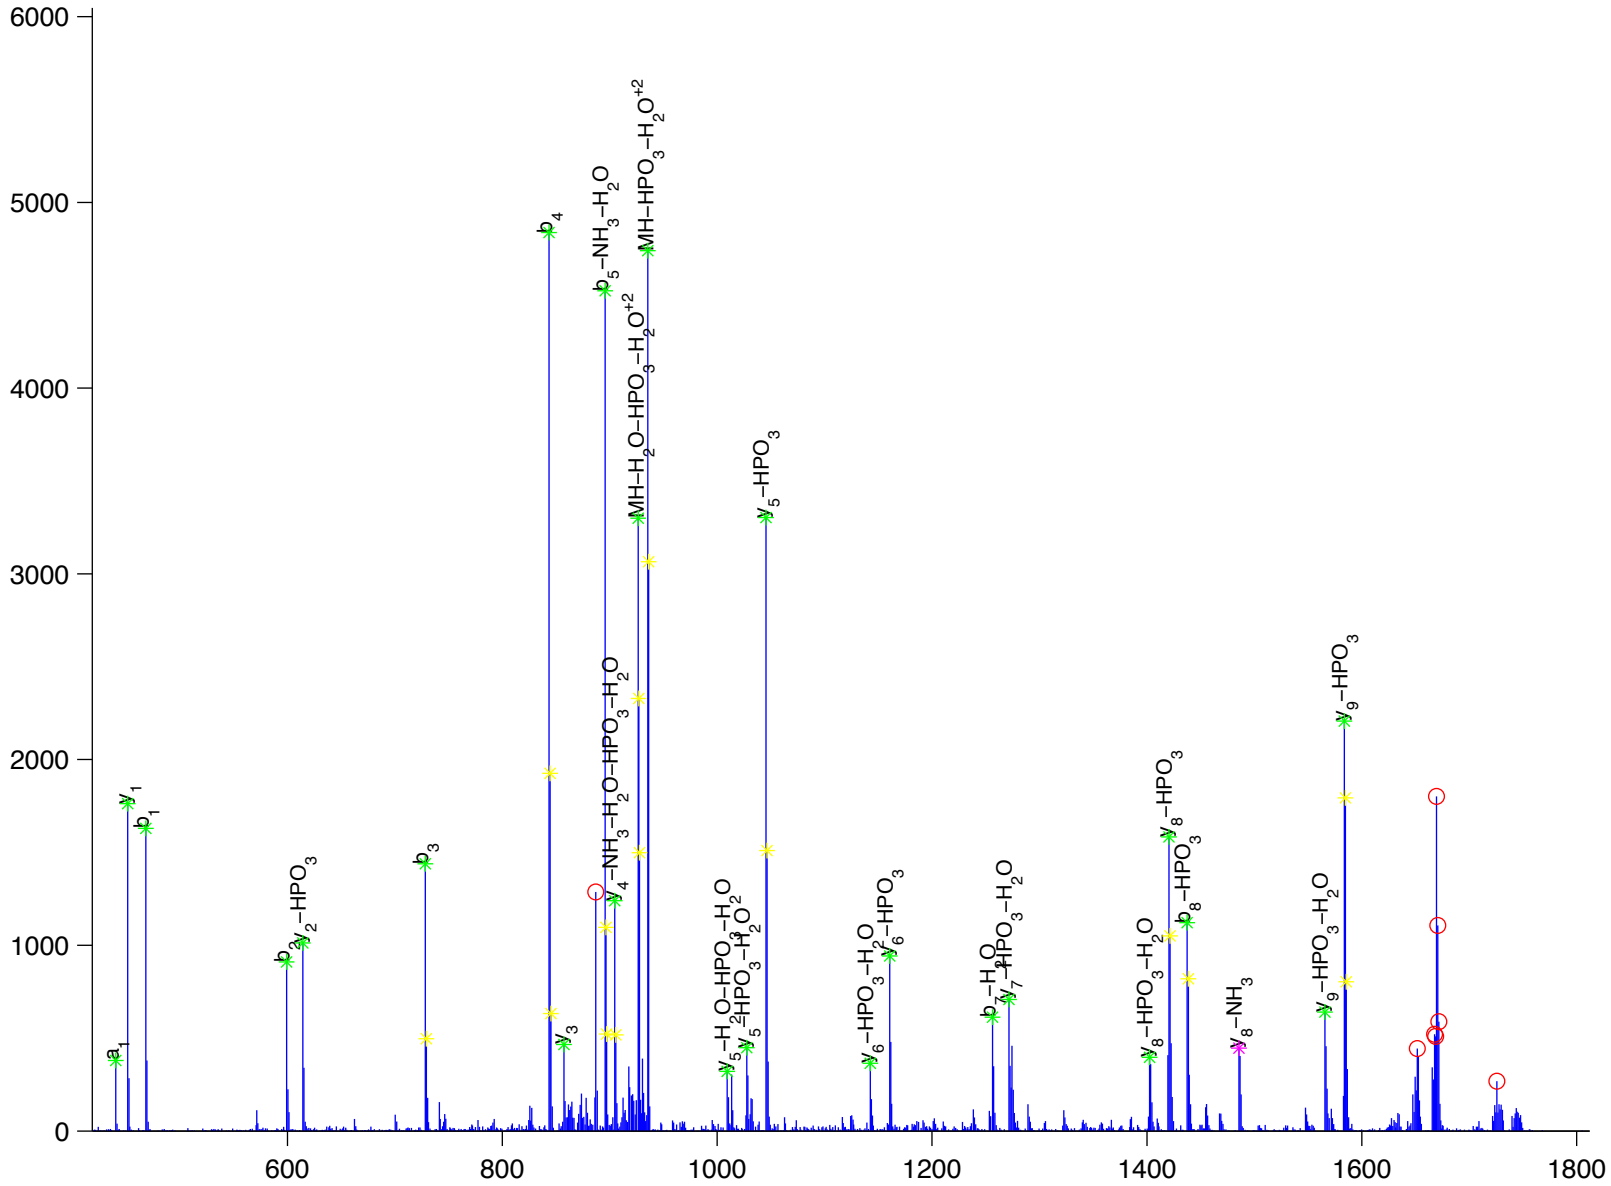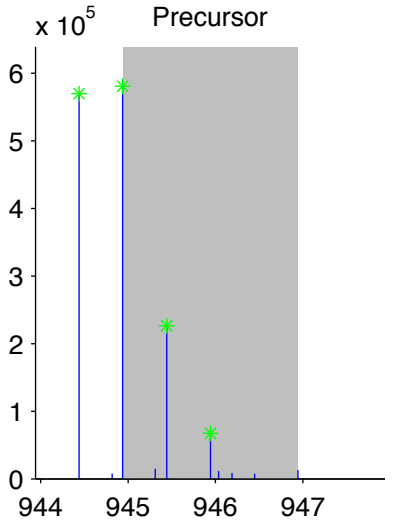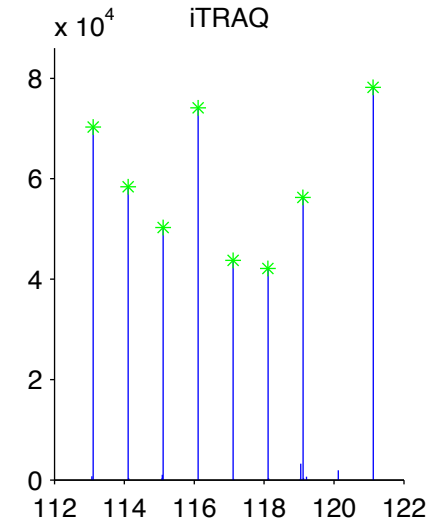

Y [ M ] [ E ] [ D ] [ S ] [ T ] y y K

PTK2 protein tyrosine kinase 2

Charge State: +2

Scan Number: 5132

File Name: 091130ptp1blivers\_hfd\_basal2.raw

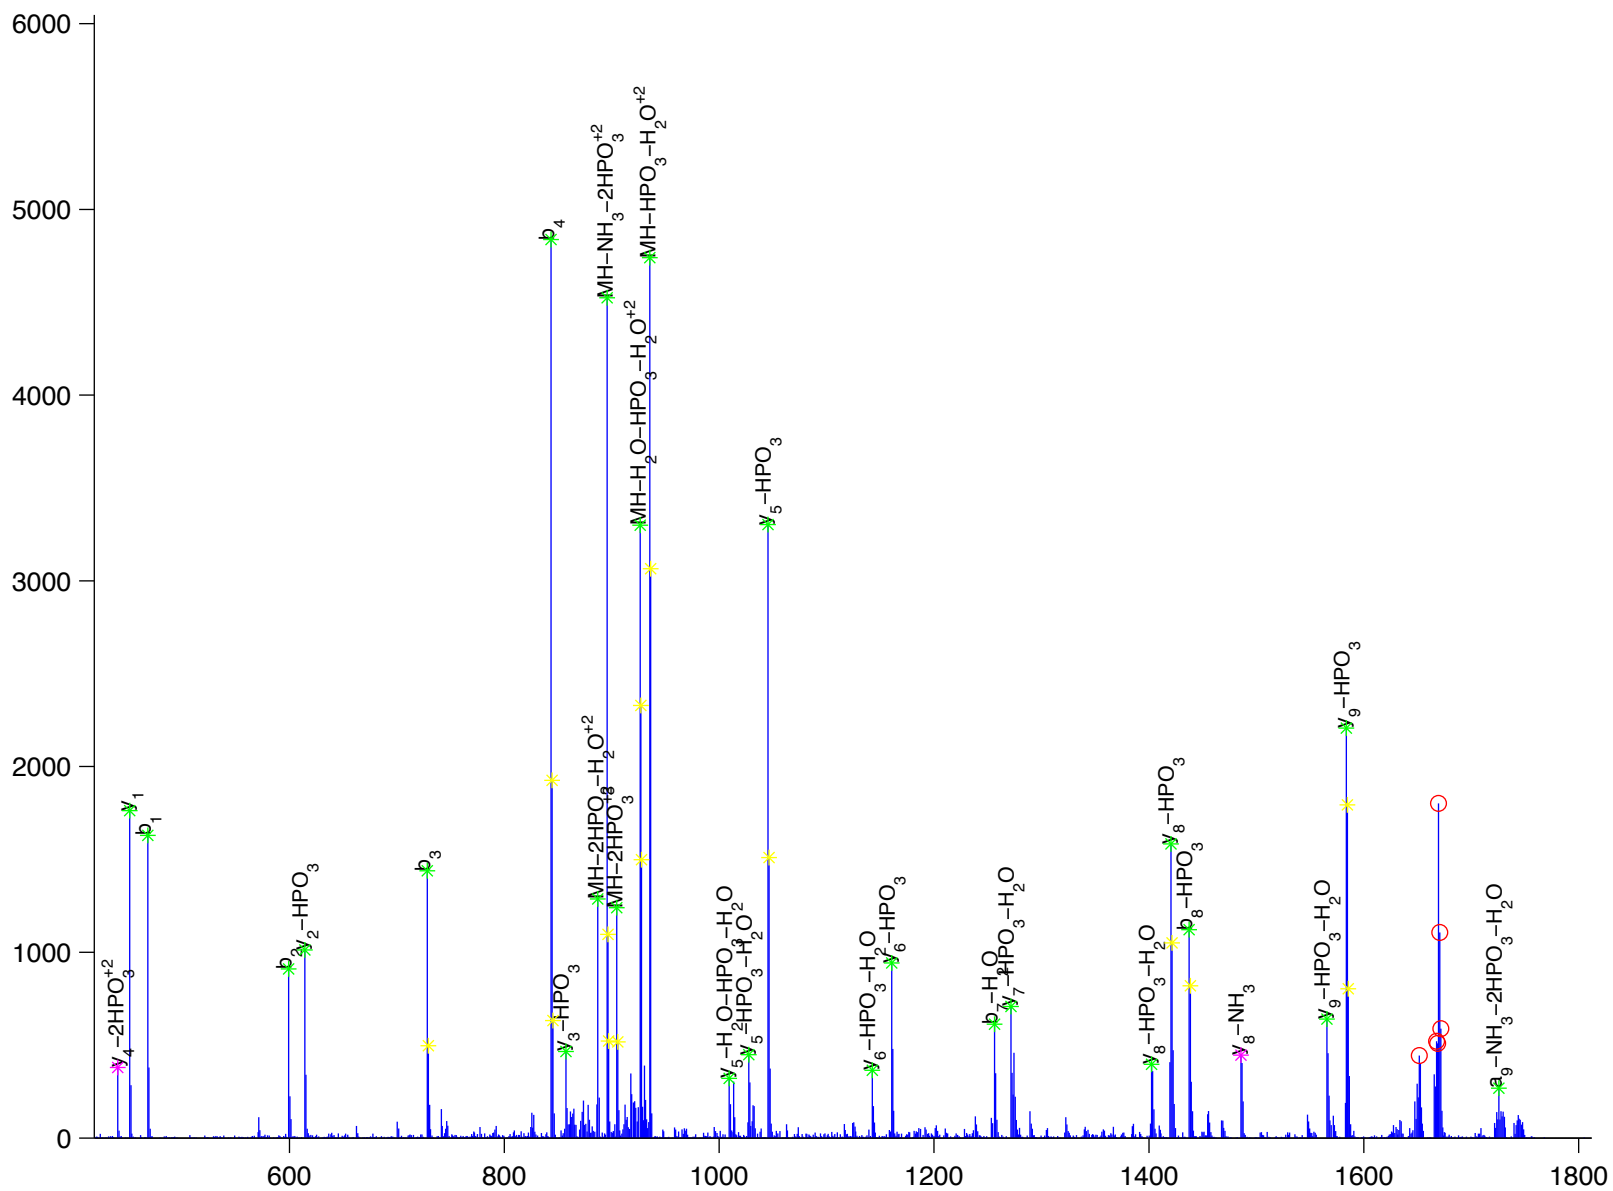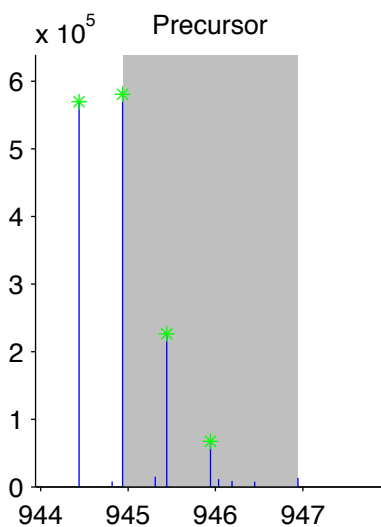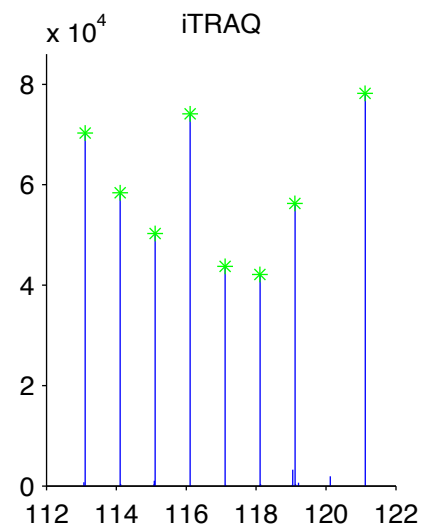

Y[M]E[D]S[T]Y[y]K

PTK2 protein tyrosine kinase 2

Charge State: +2

Scan Number: 5132

File Name: 091130ptp1blivers\_hfd\_basal2.raw

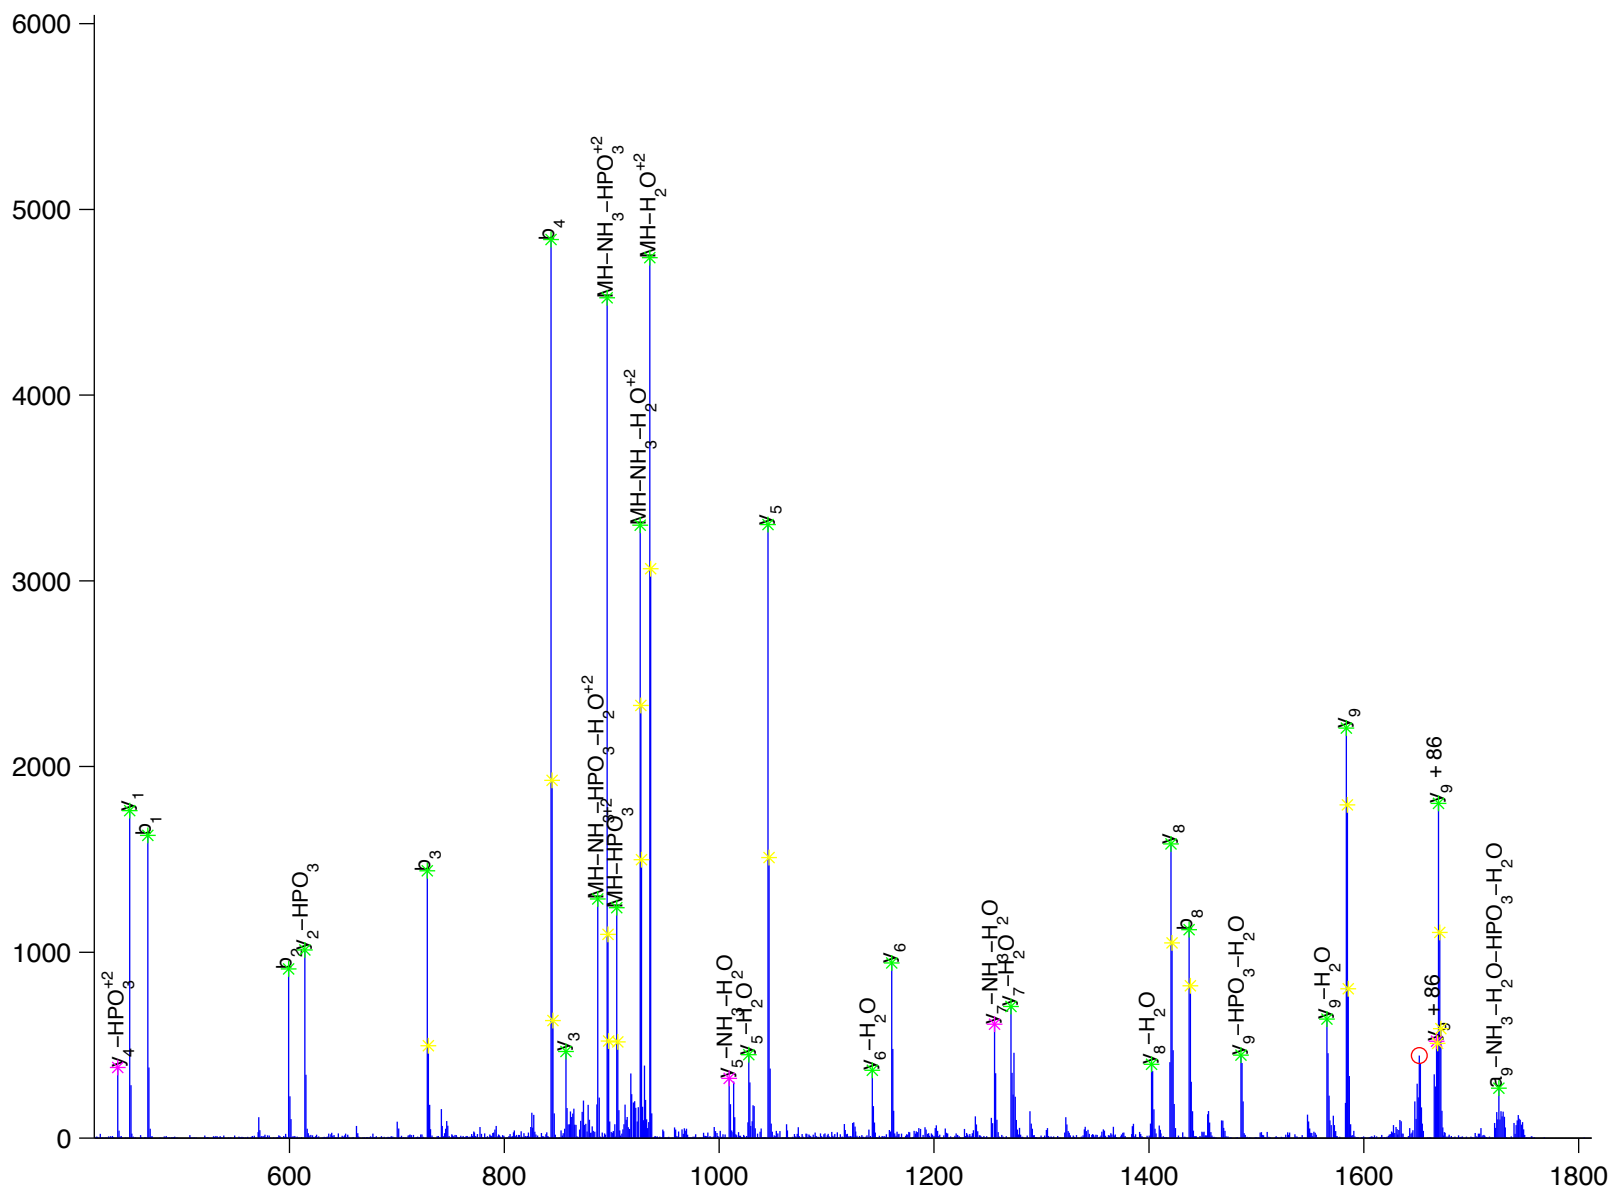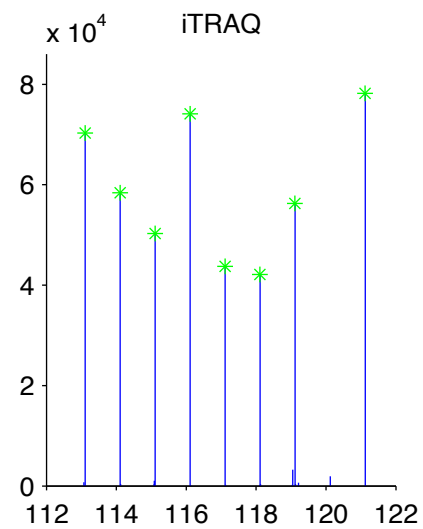

T [ H ] A [ V ] S [ V ] S [ E ] T [ D ] D [ y ] A [ E ] I [ I ] D [ E ] E [ D ] T [ Y ] T [ M ] P [ S ] T [ R ]

PTK2 protein tyrosine kinase 2

Charge State: +4

Scan Number: 6808

File Name: 090806ptp1blivers\_M\_NC2.raw

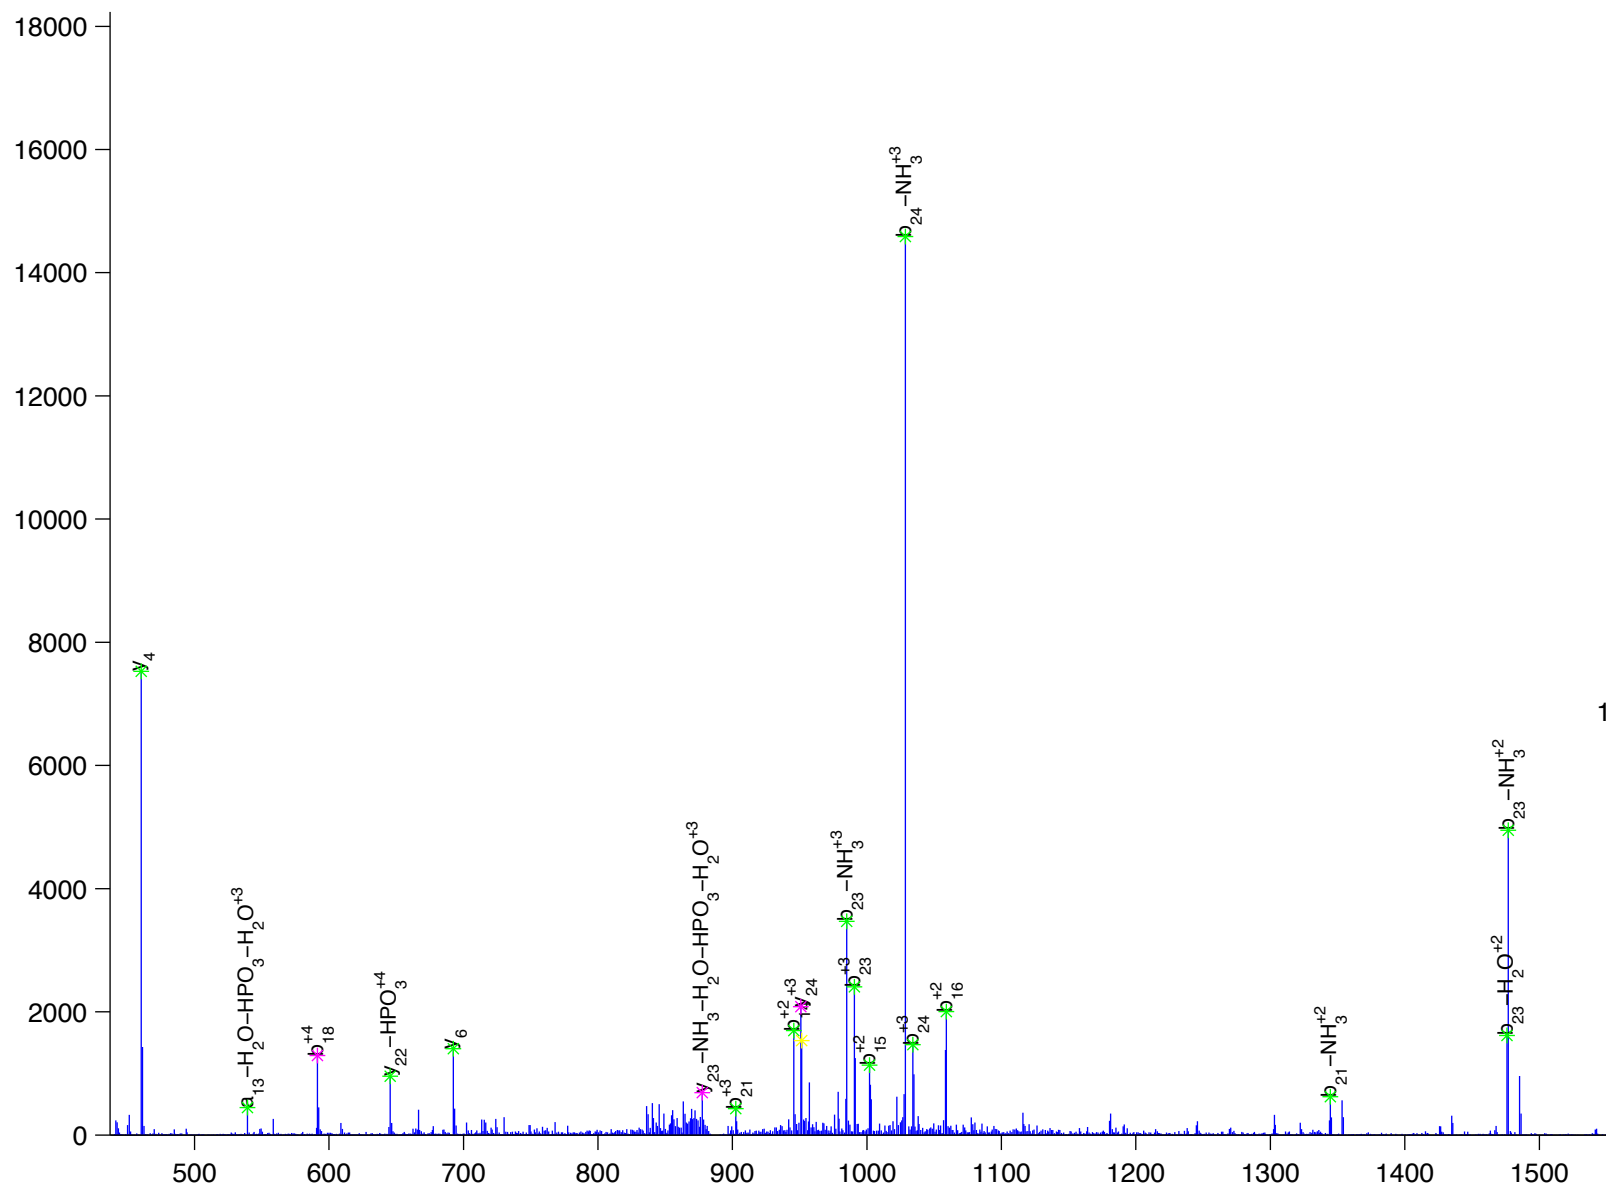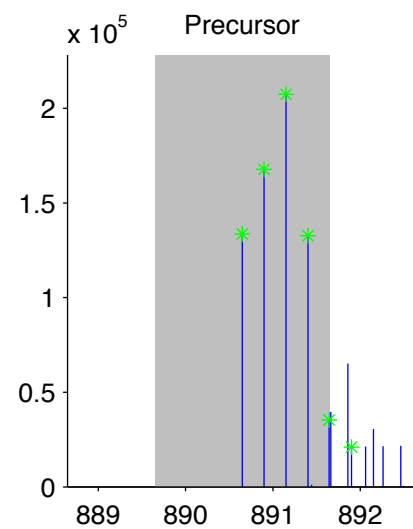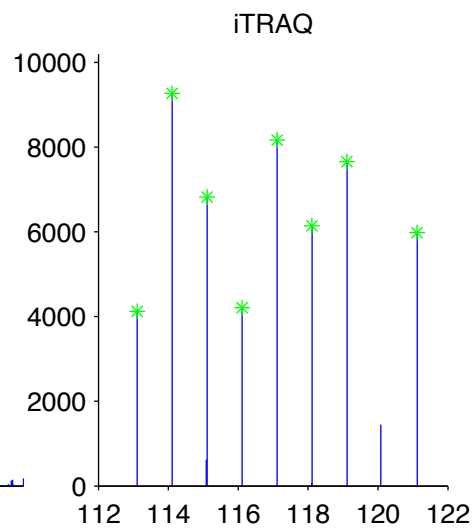

E [ A ] G [ y ] T [ E ] F [ T ] G [ P ] P [ Q ] K [ P ] P [ R ]

PTK2 protein tyrosine kinase 2 beta

Charge State: +4

Scan Number: 4519

File Name: 091130ptp1blivers\_hfd\_basal2.raw

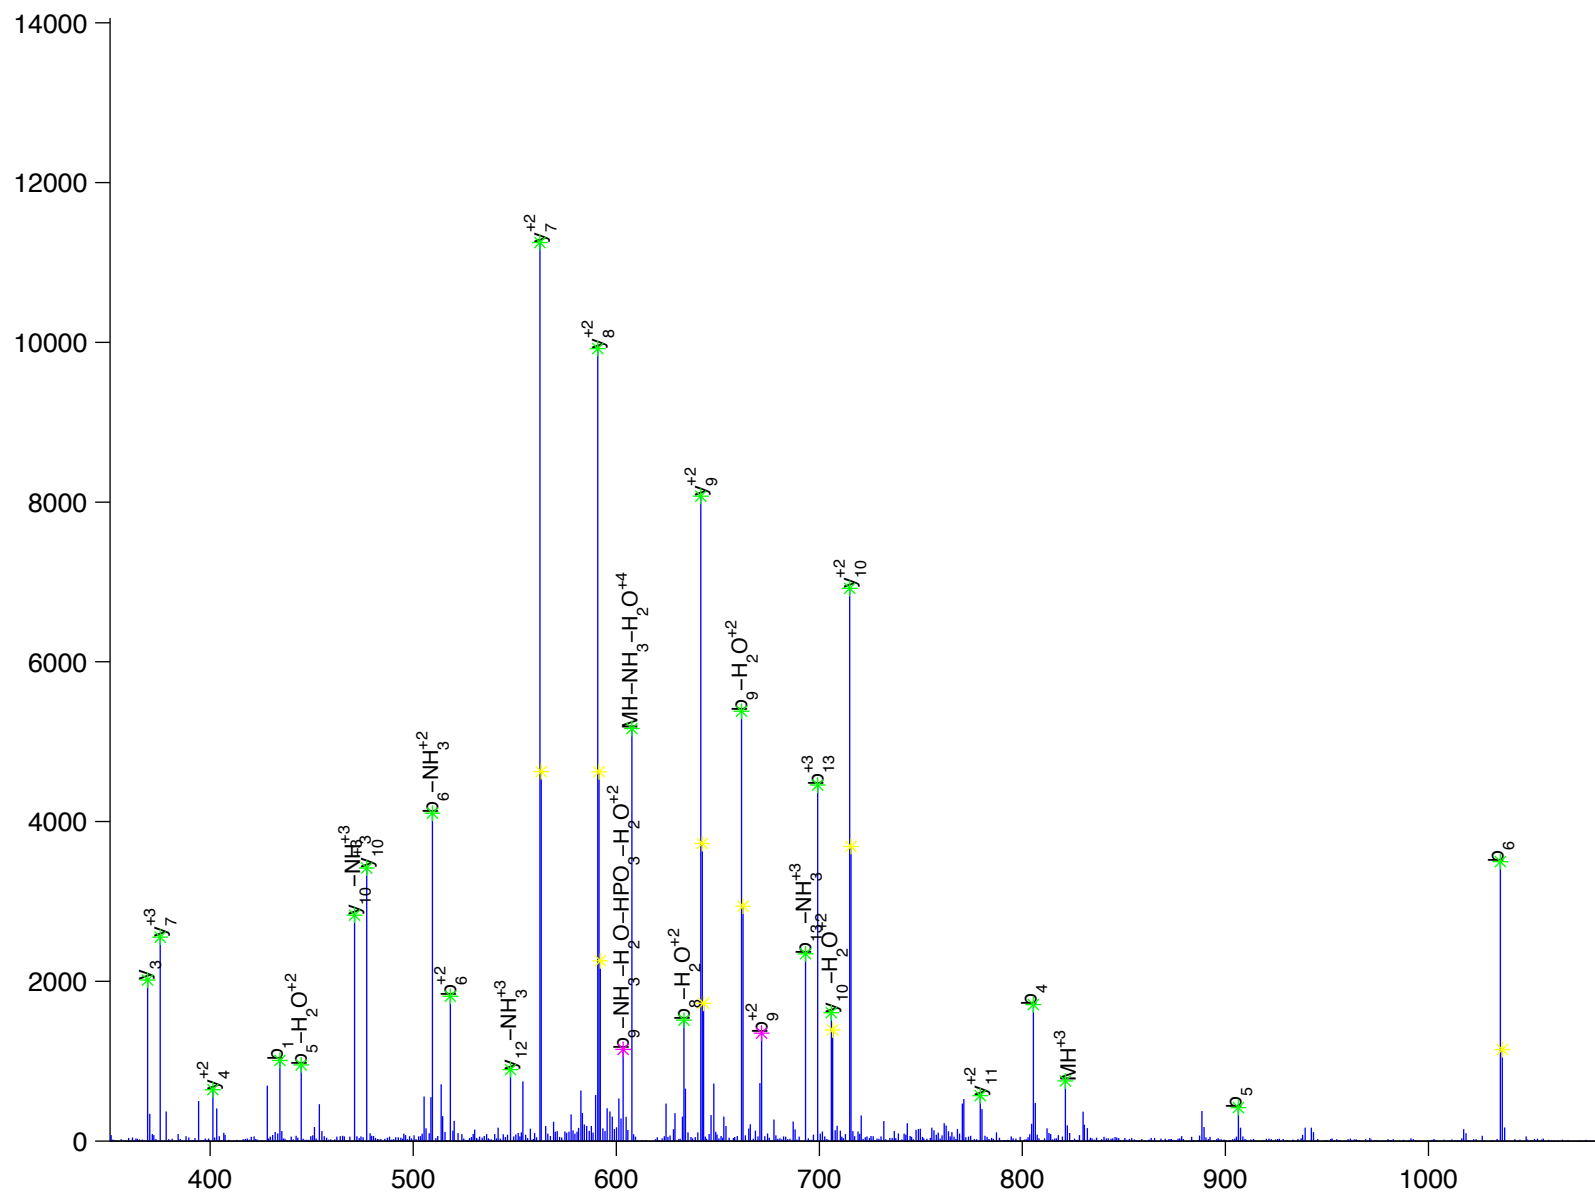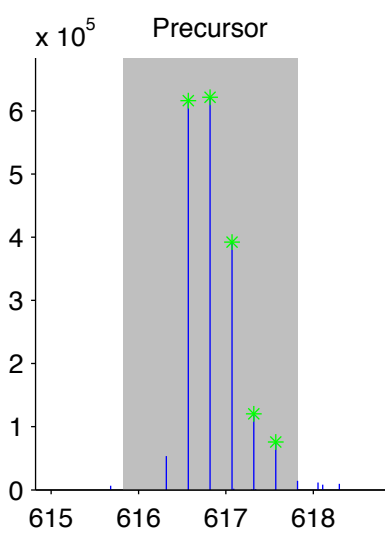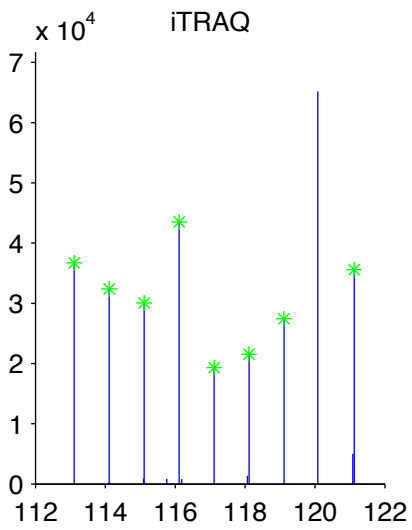

Y I E D E D y Y K A S V T R

PTK2 protein tyrosine kinase 2 beta

Charge State: +3

Scan Number: 4934

File Name: 090806ptp1blivers\_M\_NC2.raw

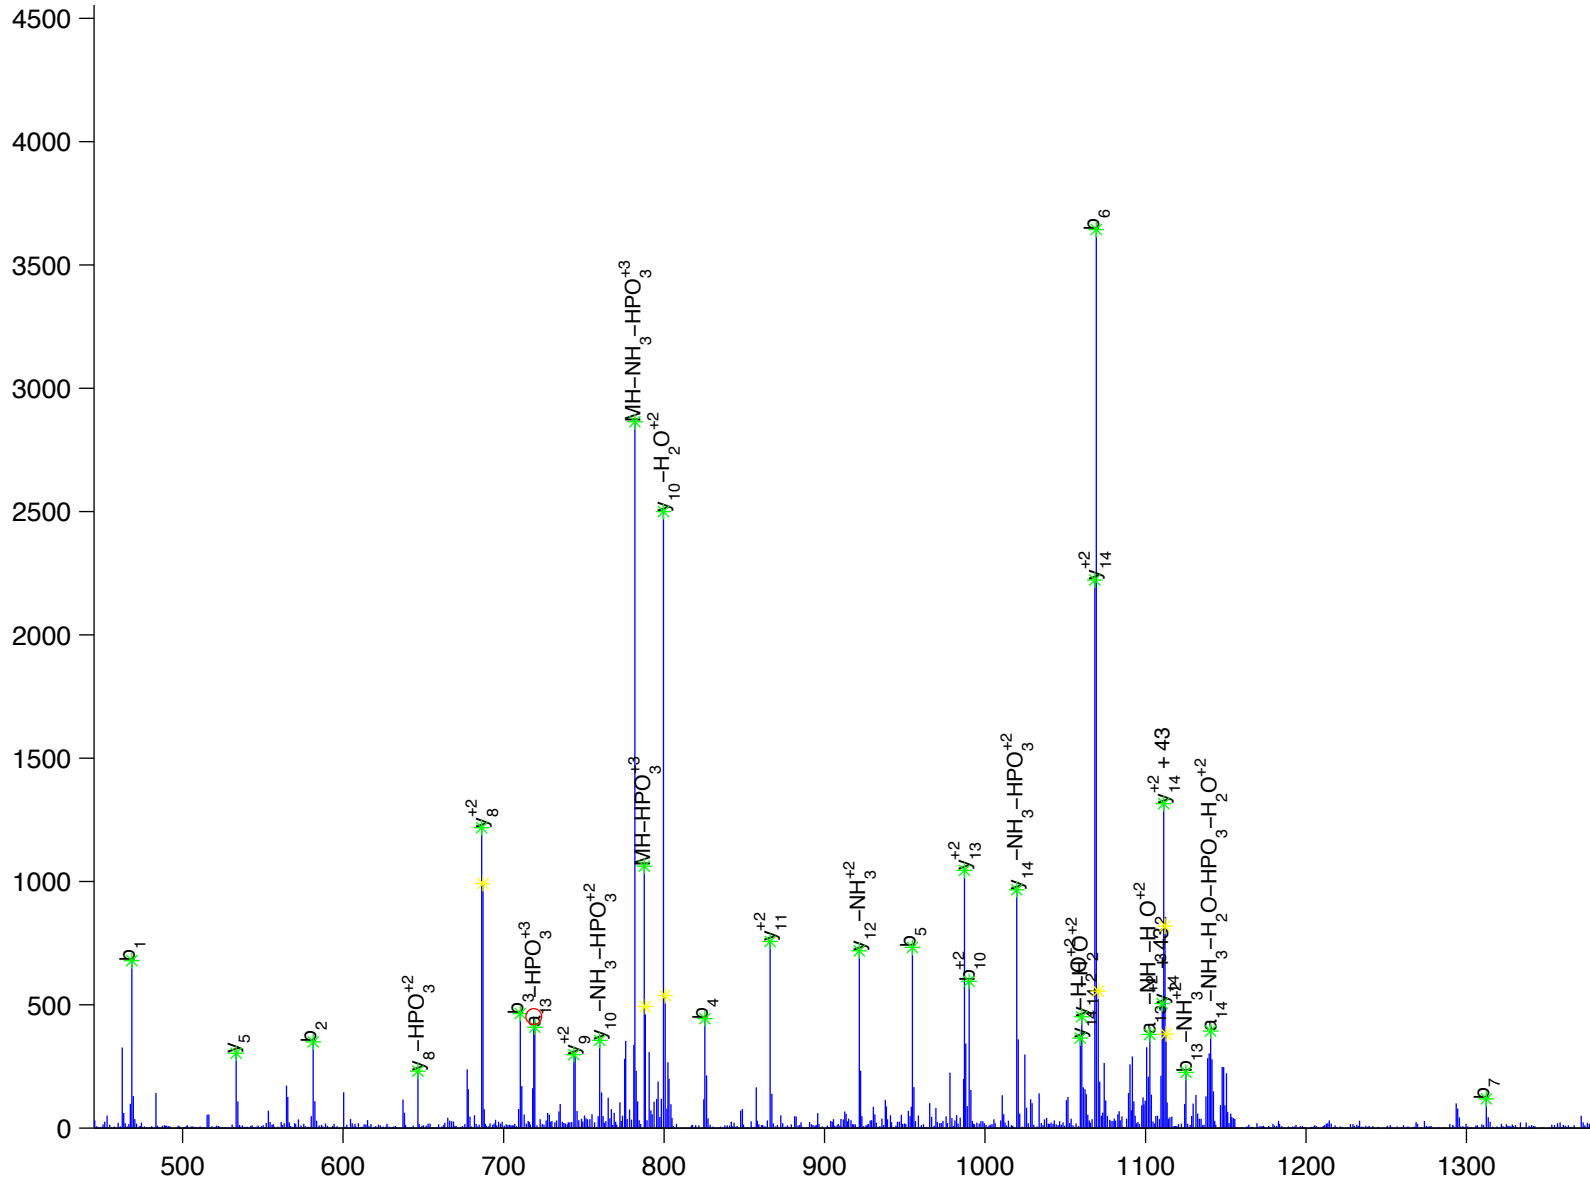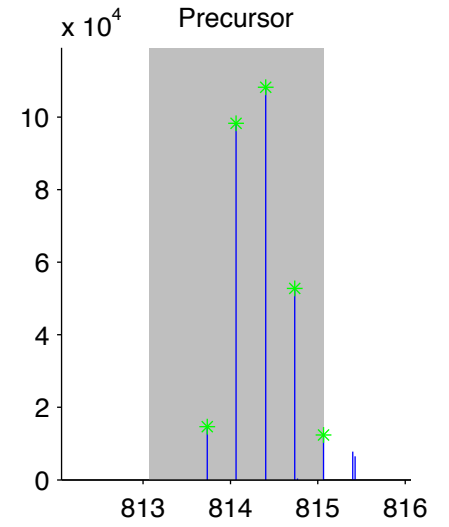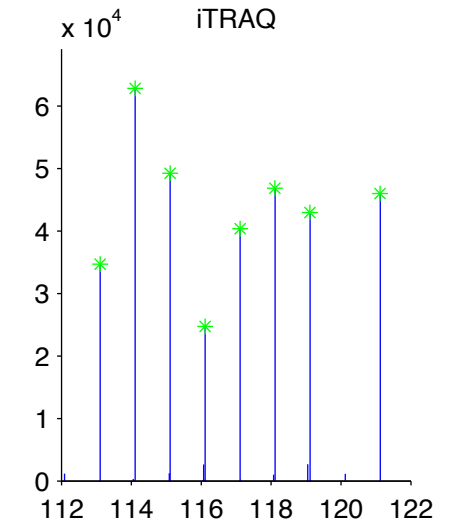

Y I E D E D y y K A S V T R

PTK2 protein tyrosine kinase 2 beta

Charge State: +3

Scan Number: 5197

File Name: 091130ptp1blivers\_hfd\_basal2.raw

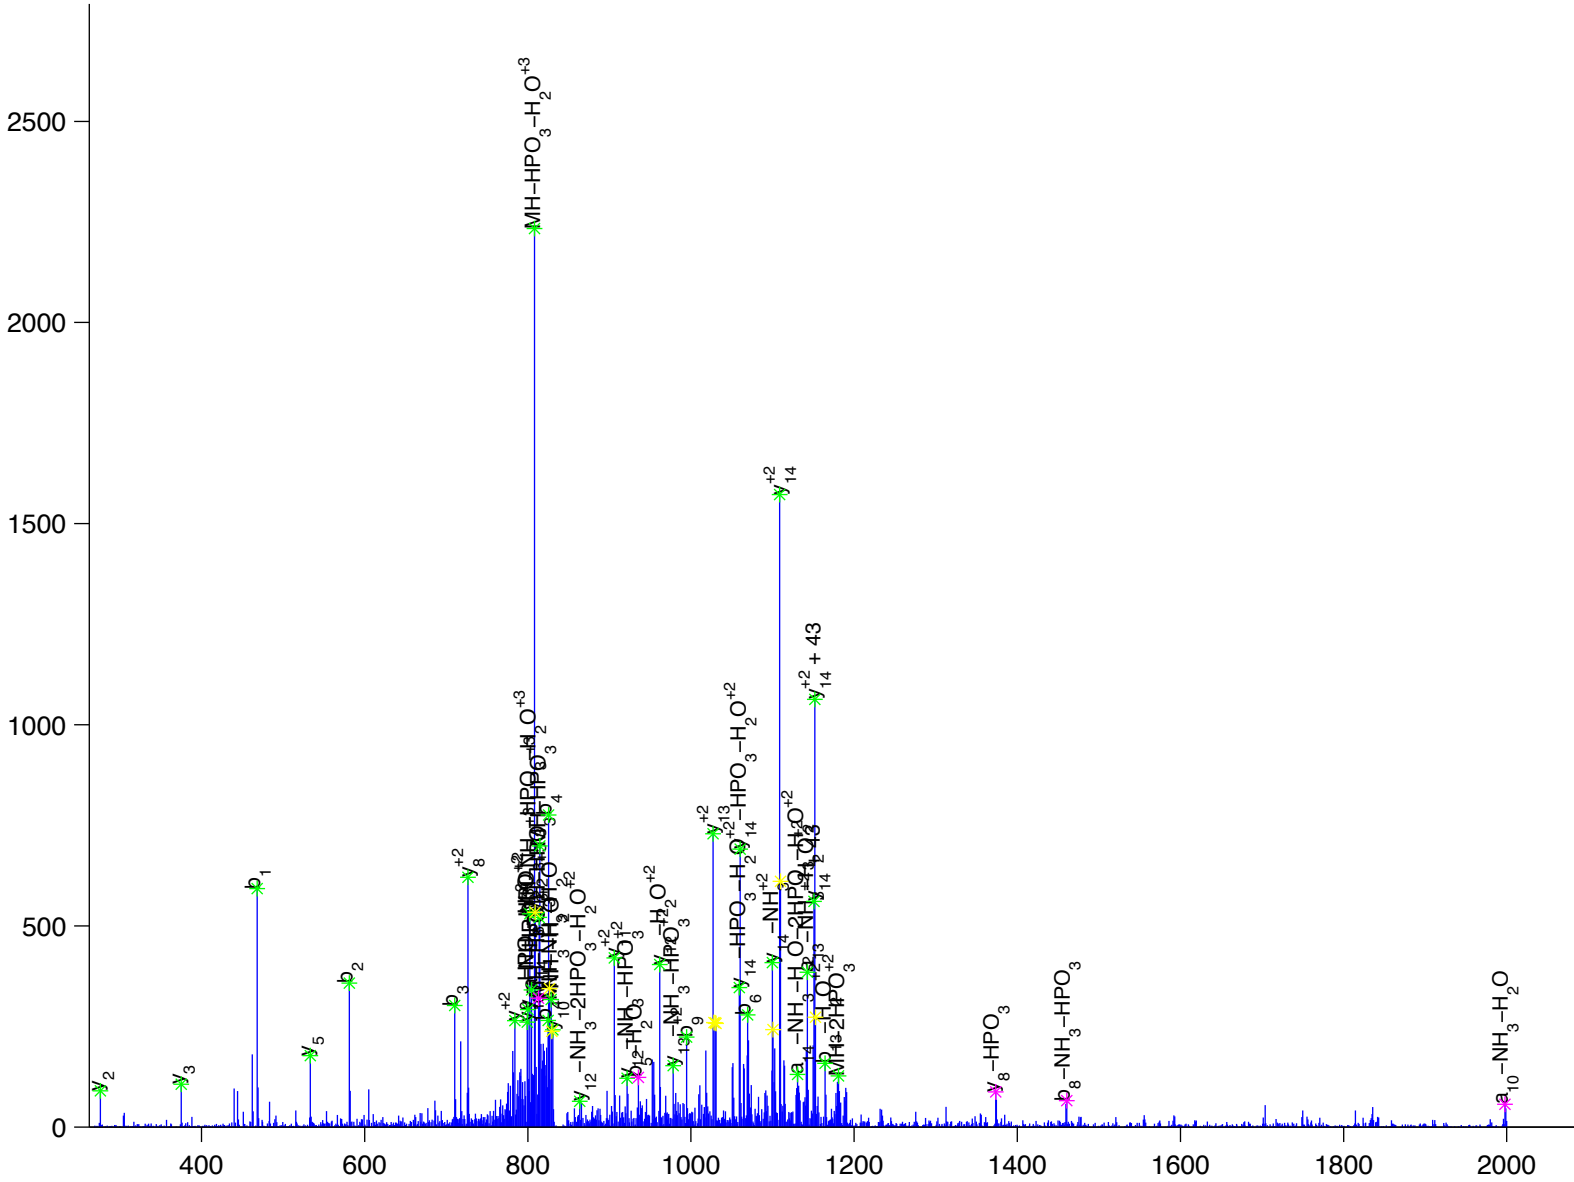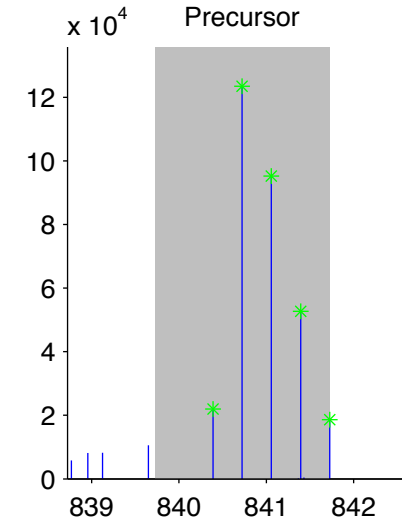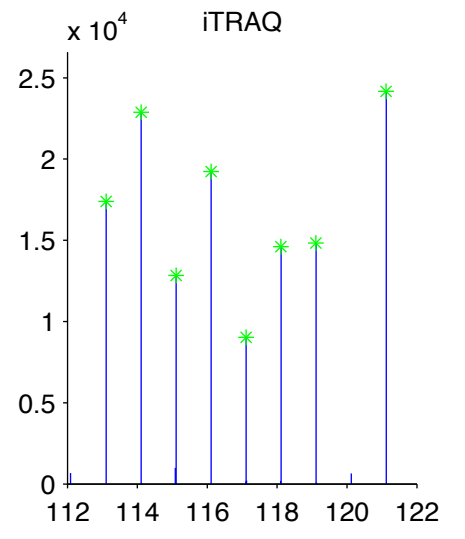





E [ N ] G [ V ] D [ A ] V [ H ] P [ G ] y [ G ] F [ L ] S [ E ] R

pyruvate carboxylase

Charge State: +3

Scan Number: 4497

File Name: 100905ptp1blivers\_ncHFD\_basal.raw

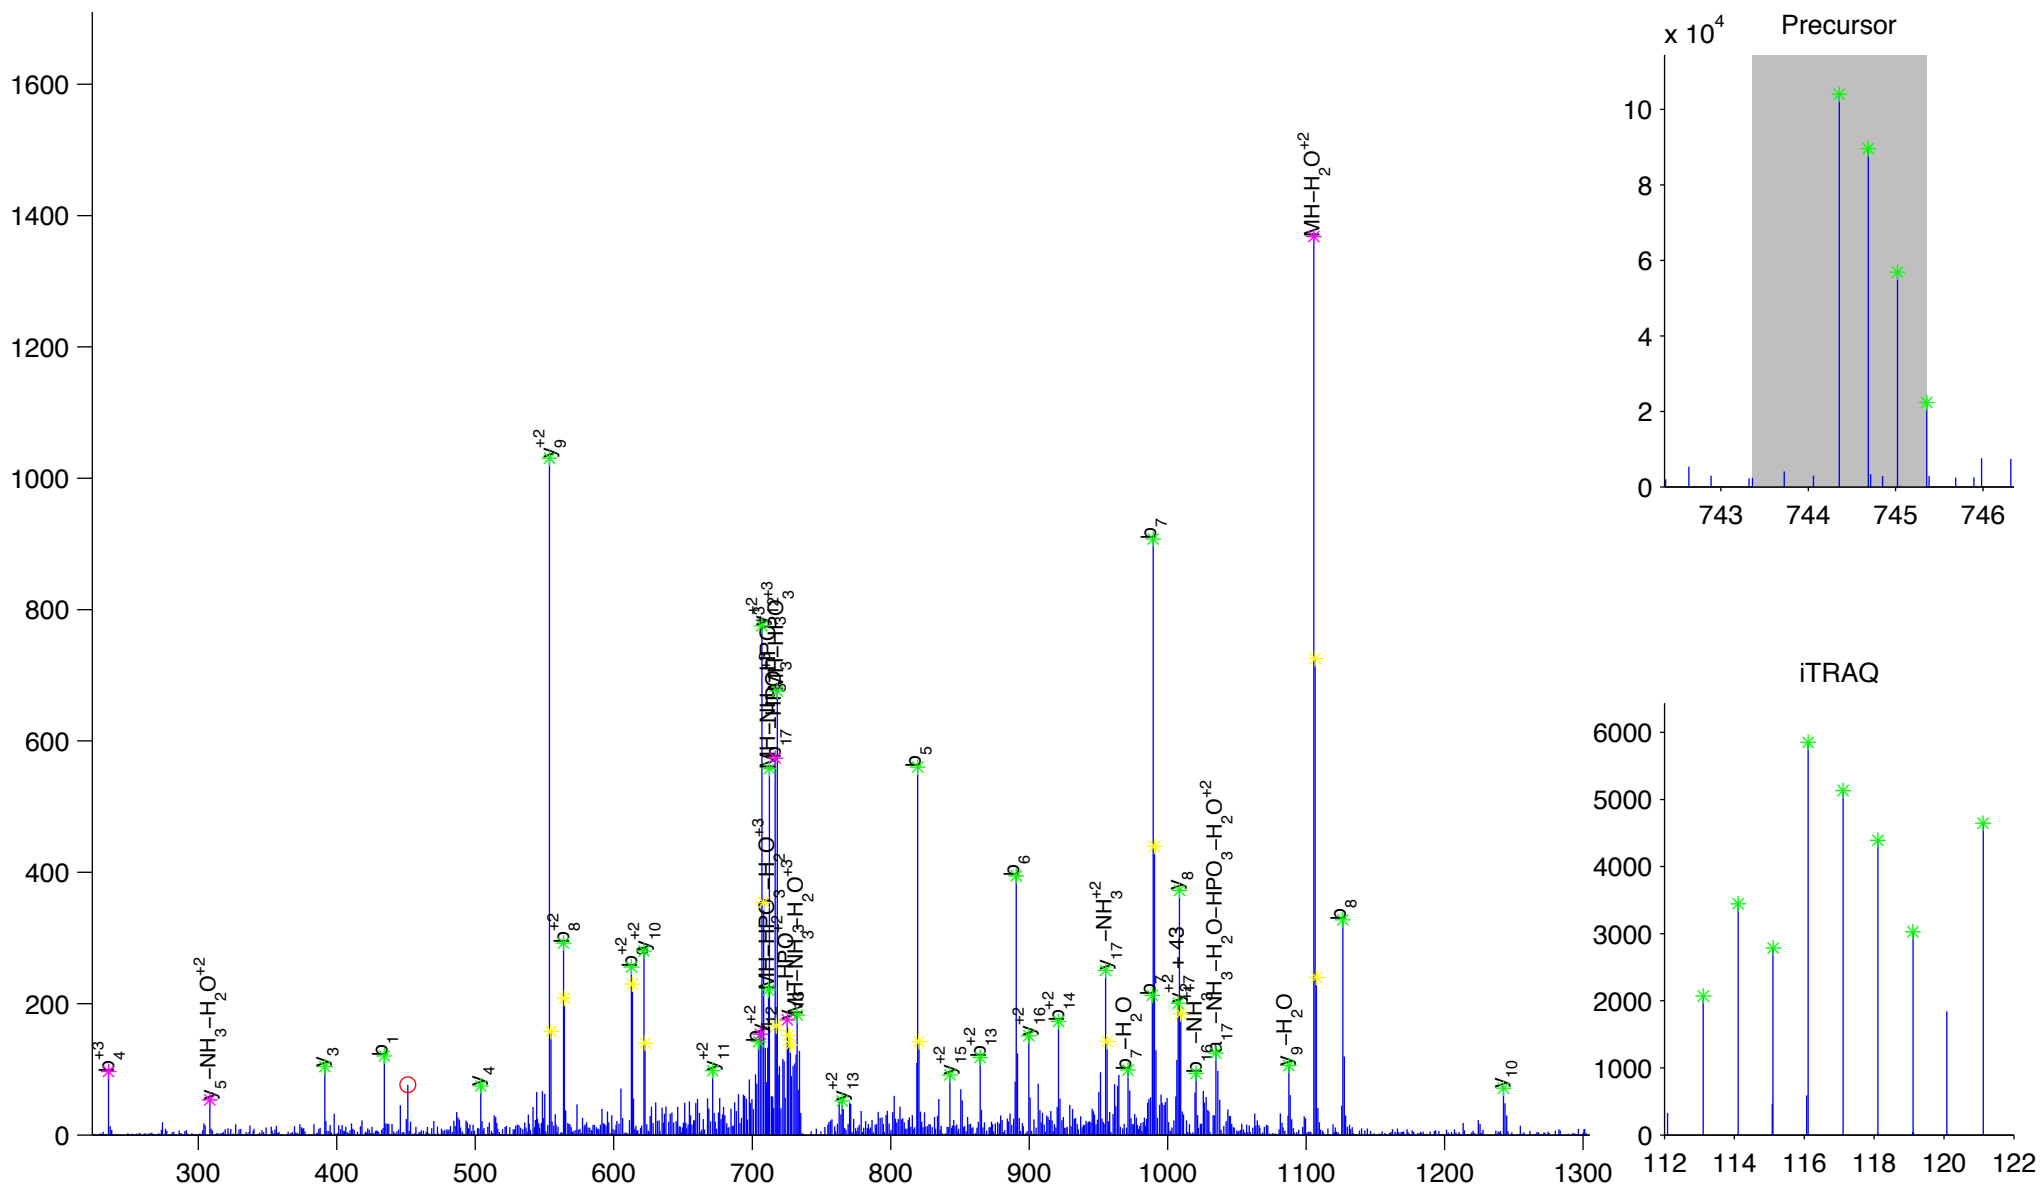

V [ F ] [ L ] [ L ] [ G ] [ E ] [ E ] [ V ] [ A ] [ Q ] [ Y ] [ D ] [ G ] [ A ] [ y ] [ K ]

pyruvate dehydrogenase (lipoamide) beta

Charge State: +3

Scan Number: 7708

File Name: 100905ptp1blivers\_ncHFD\_basal.raw

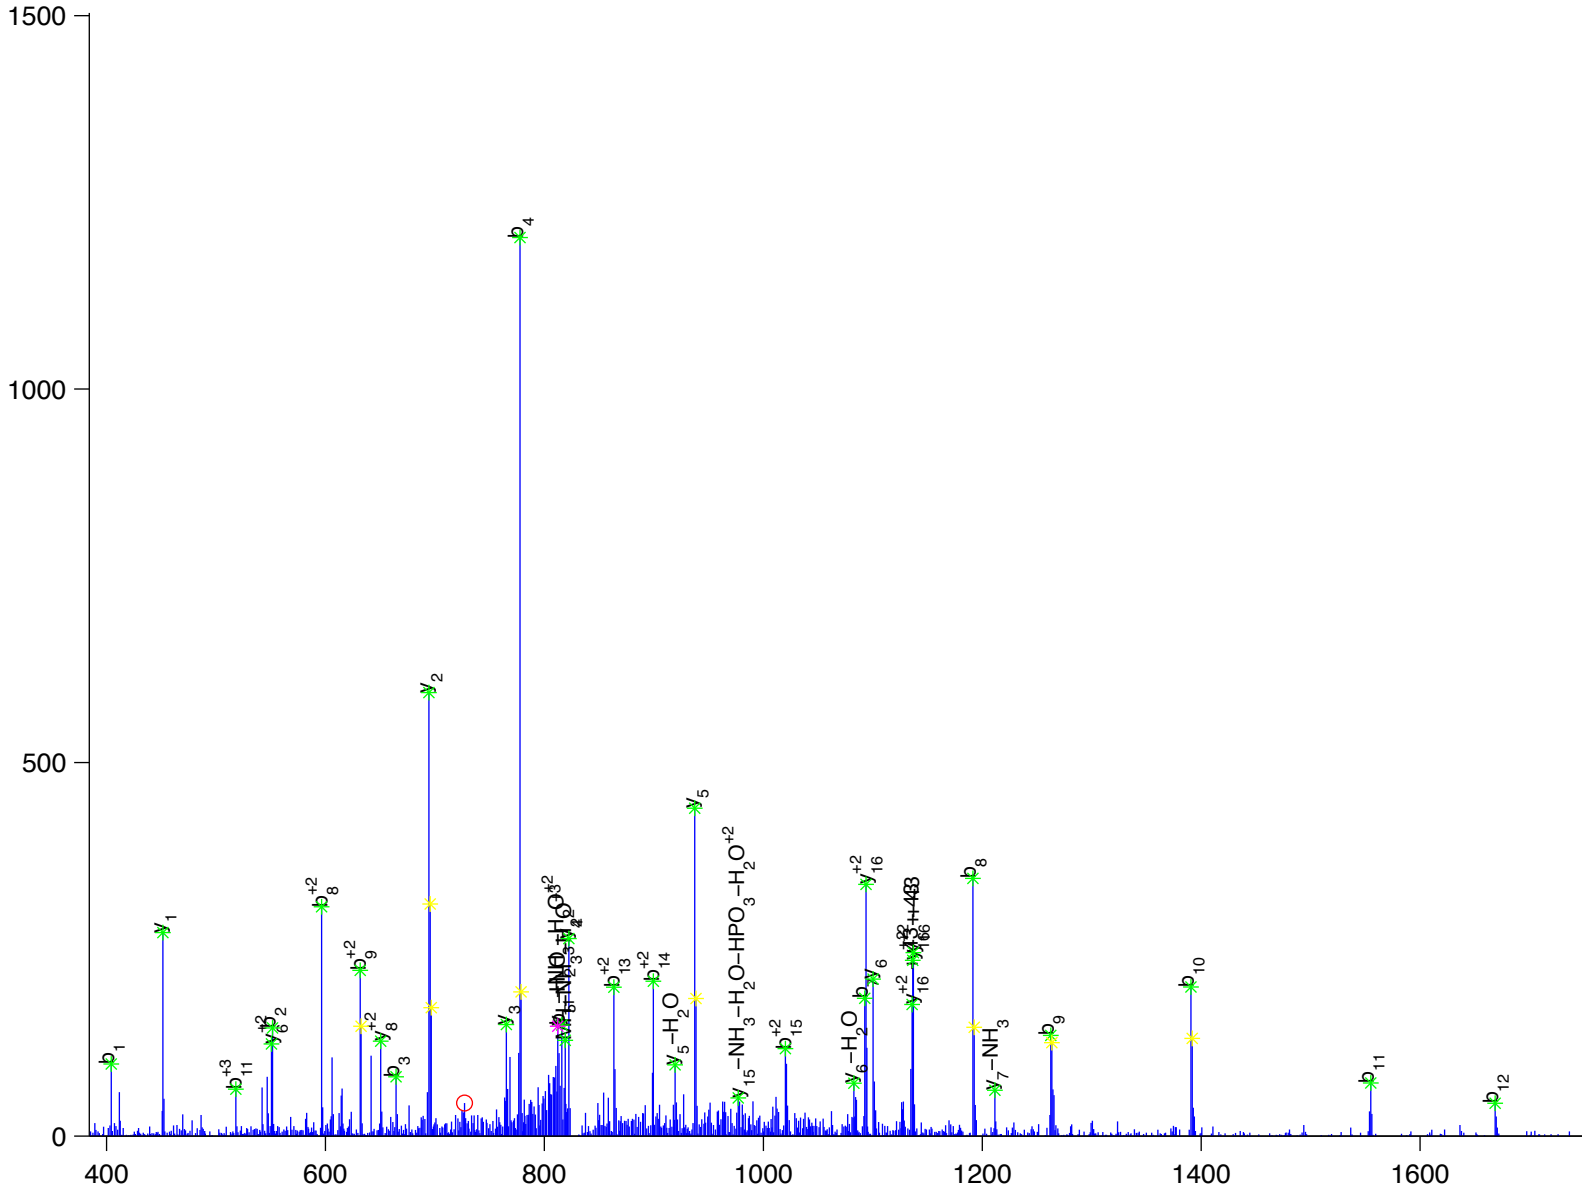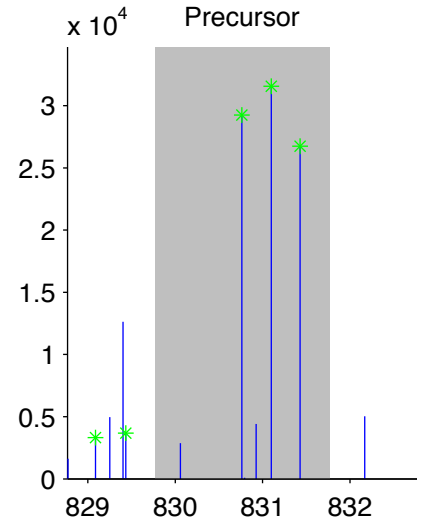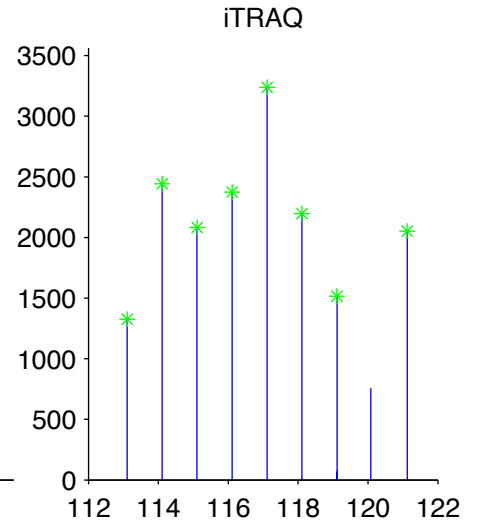

N[S]Q[E]A[E]V[A]C[P]F[I]D[S]T[y]S[C]P[G]K

RanBP-type and C3HC4-type zinc finger containing 1

Charge State: +3

Scan Number: 6039

File Name: 091130ptp1blivers\_hfd\_basal2.raw

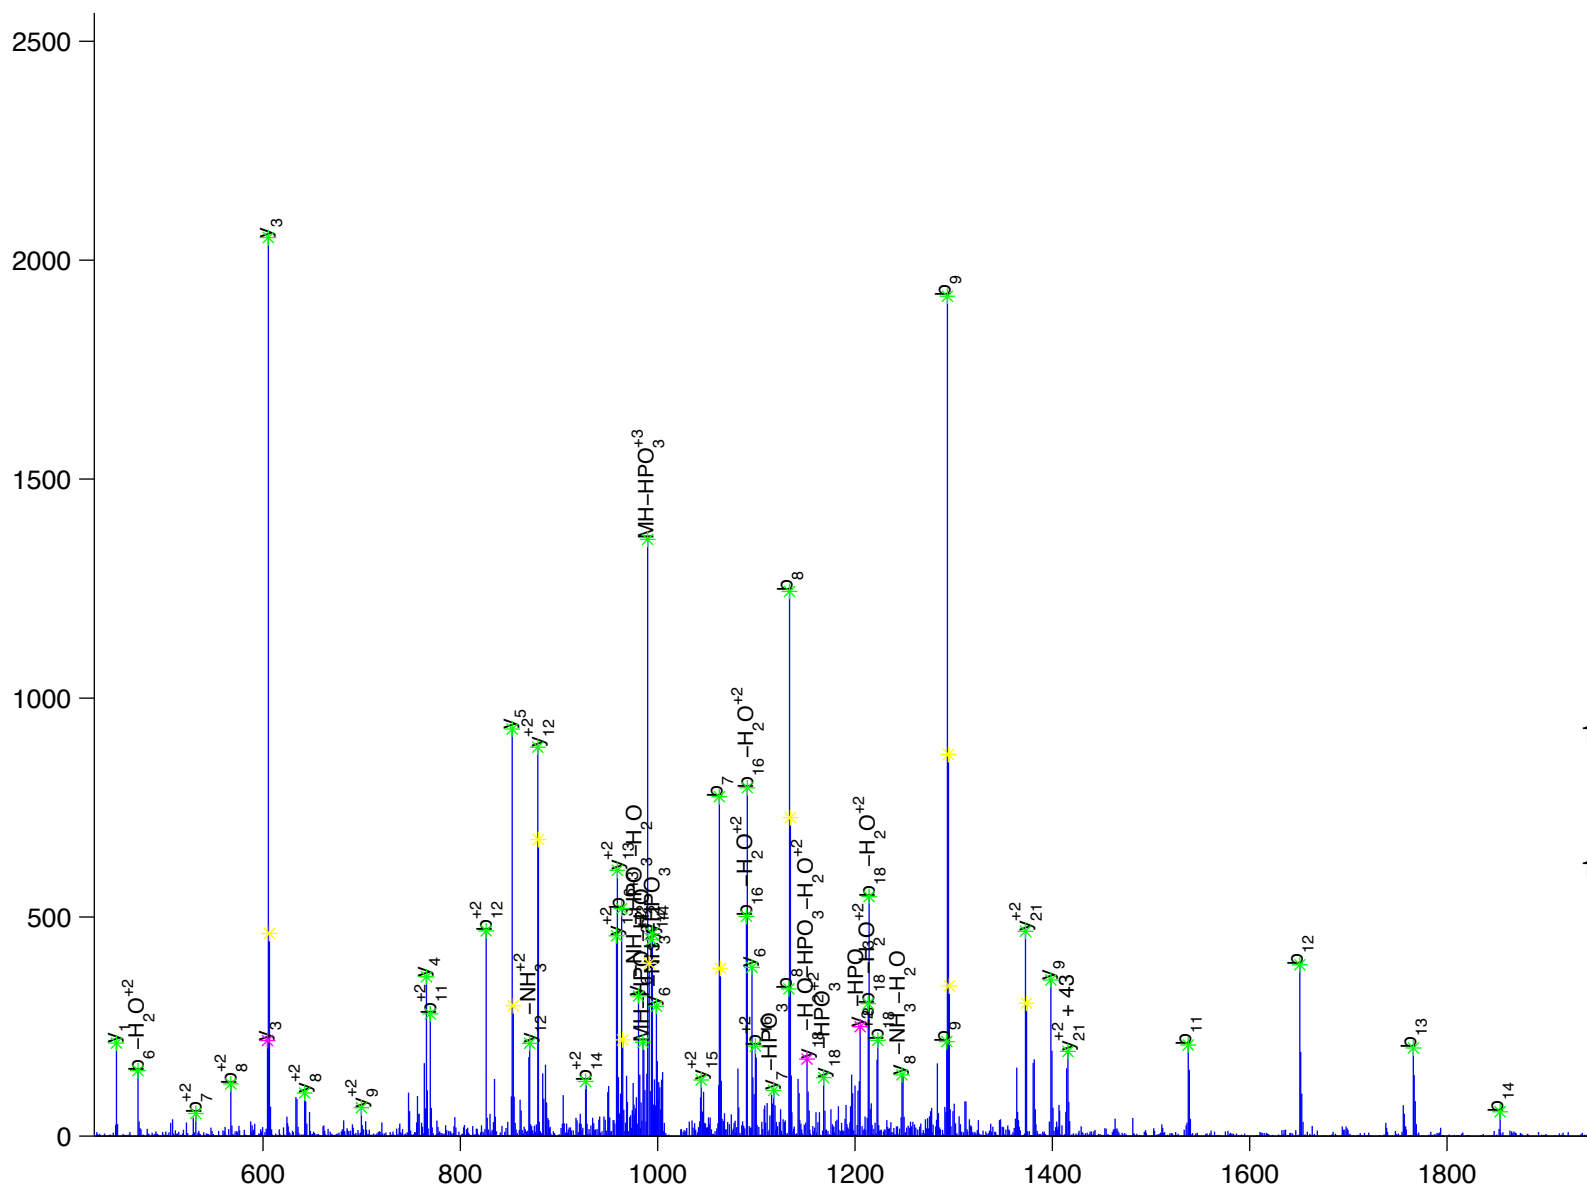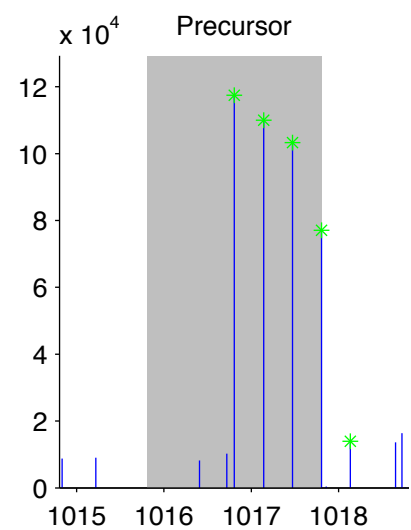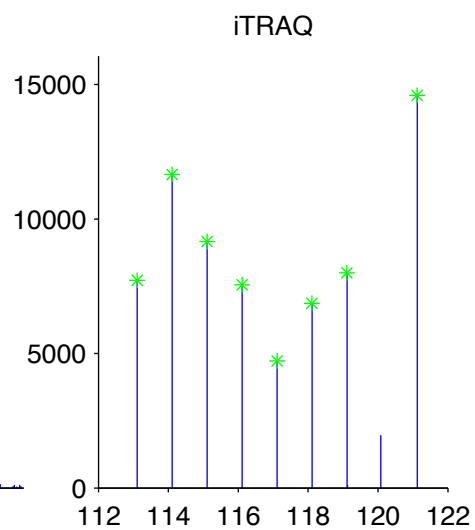



F A y L G R

ribosomal protein L13a

Charge State: +2

Scan Number: 6358

File Name: 091130ptp1blivers\_hfd\_basal2.raw

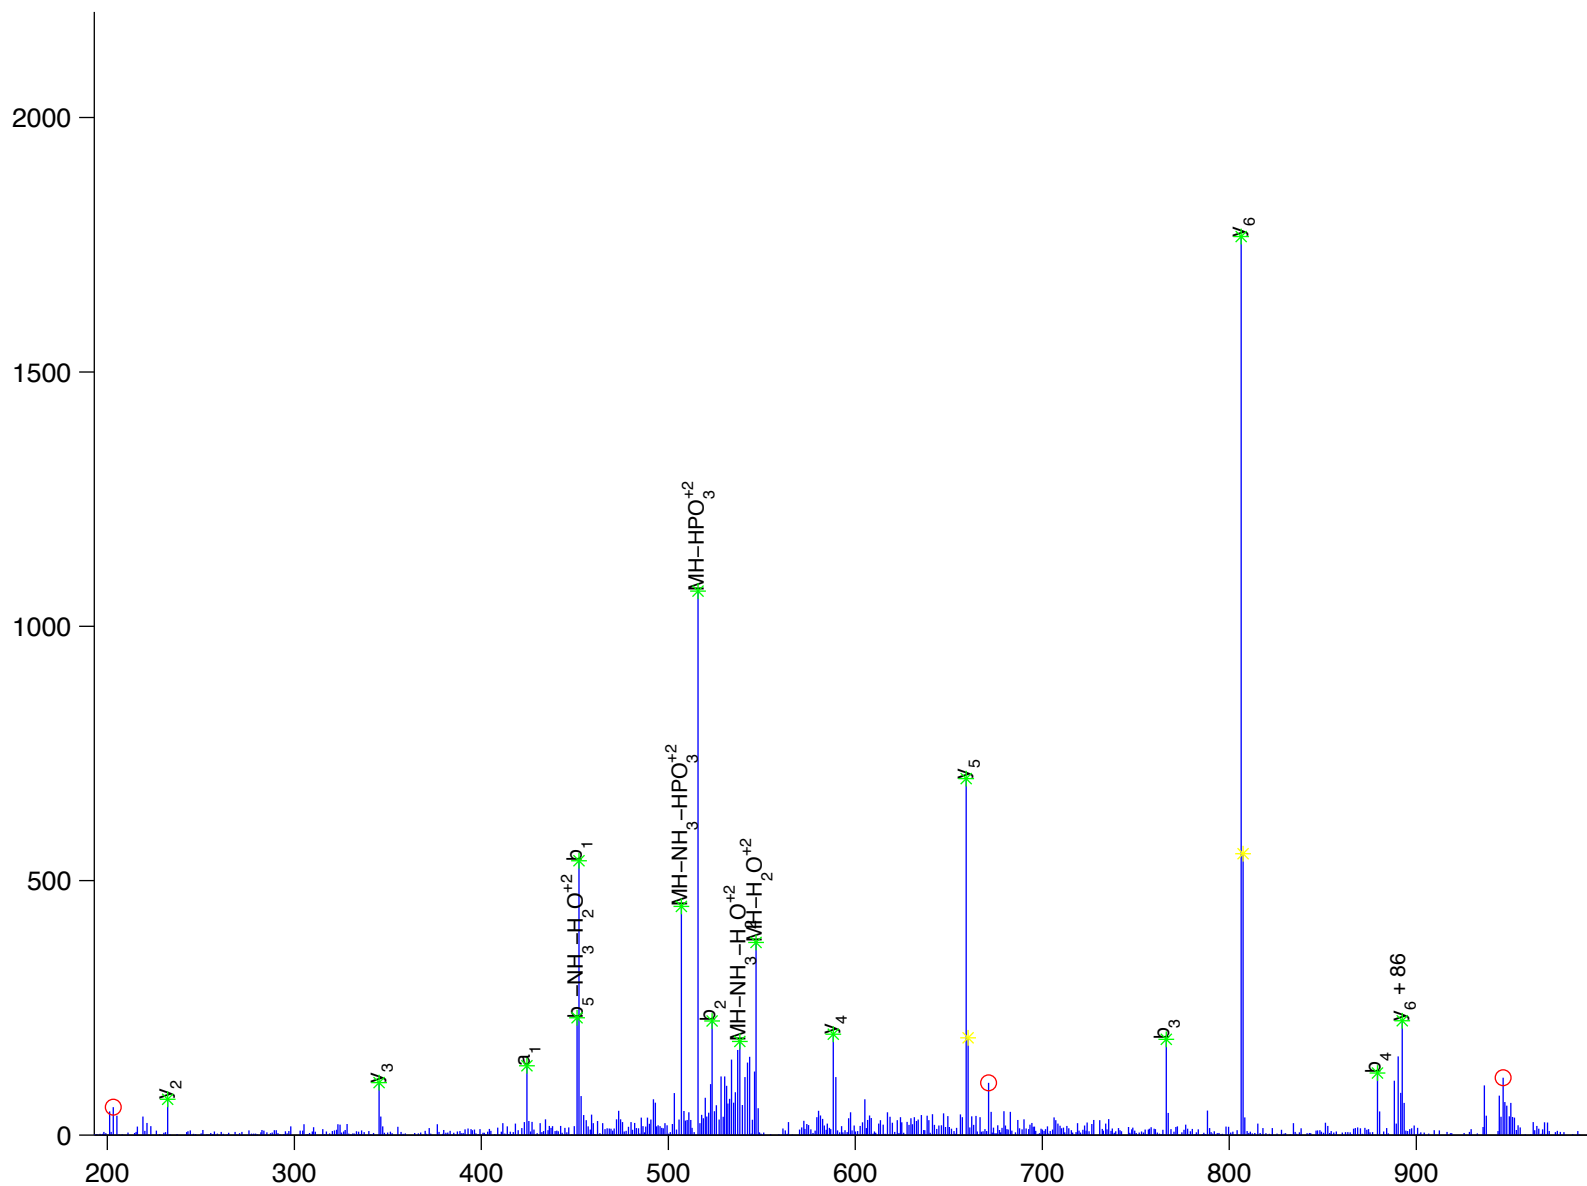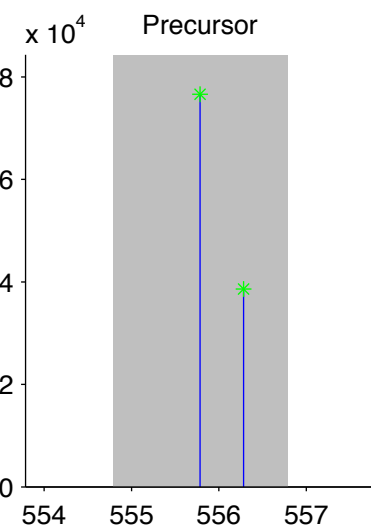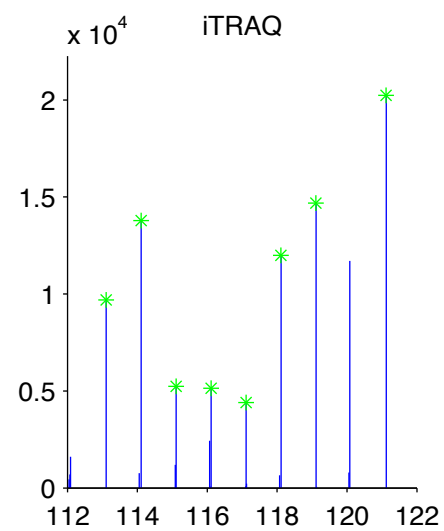

E [ P ] I [ y ] T [ L ] P [ A ] I [ I ] S [ K ]

RIKEN cDNA 9030420J04 gene

Charge State: +3

Scan Number: 8846

File Name: 090806ptp1blivers\_M\_NC2.raw

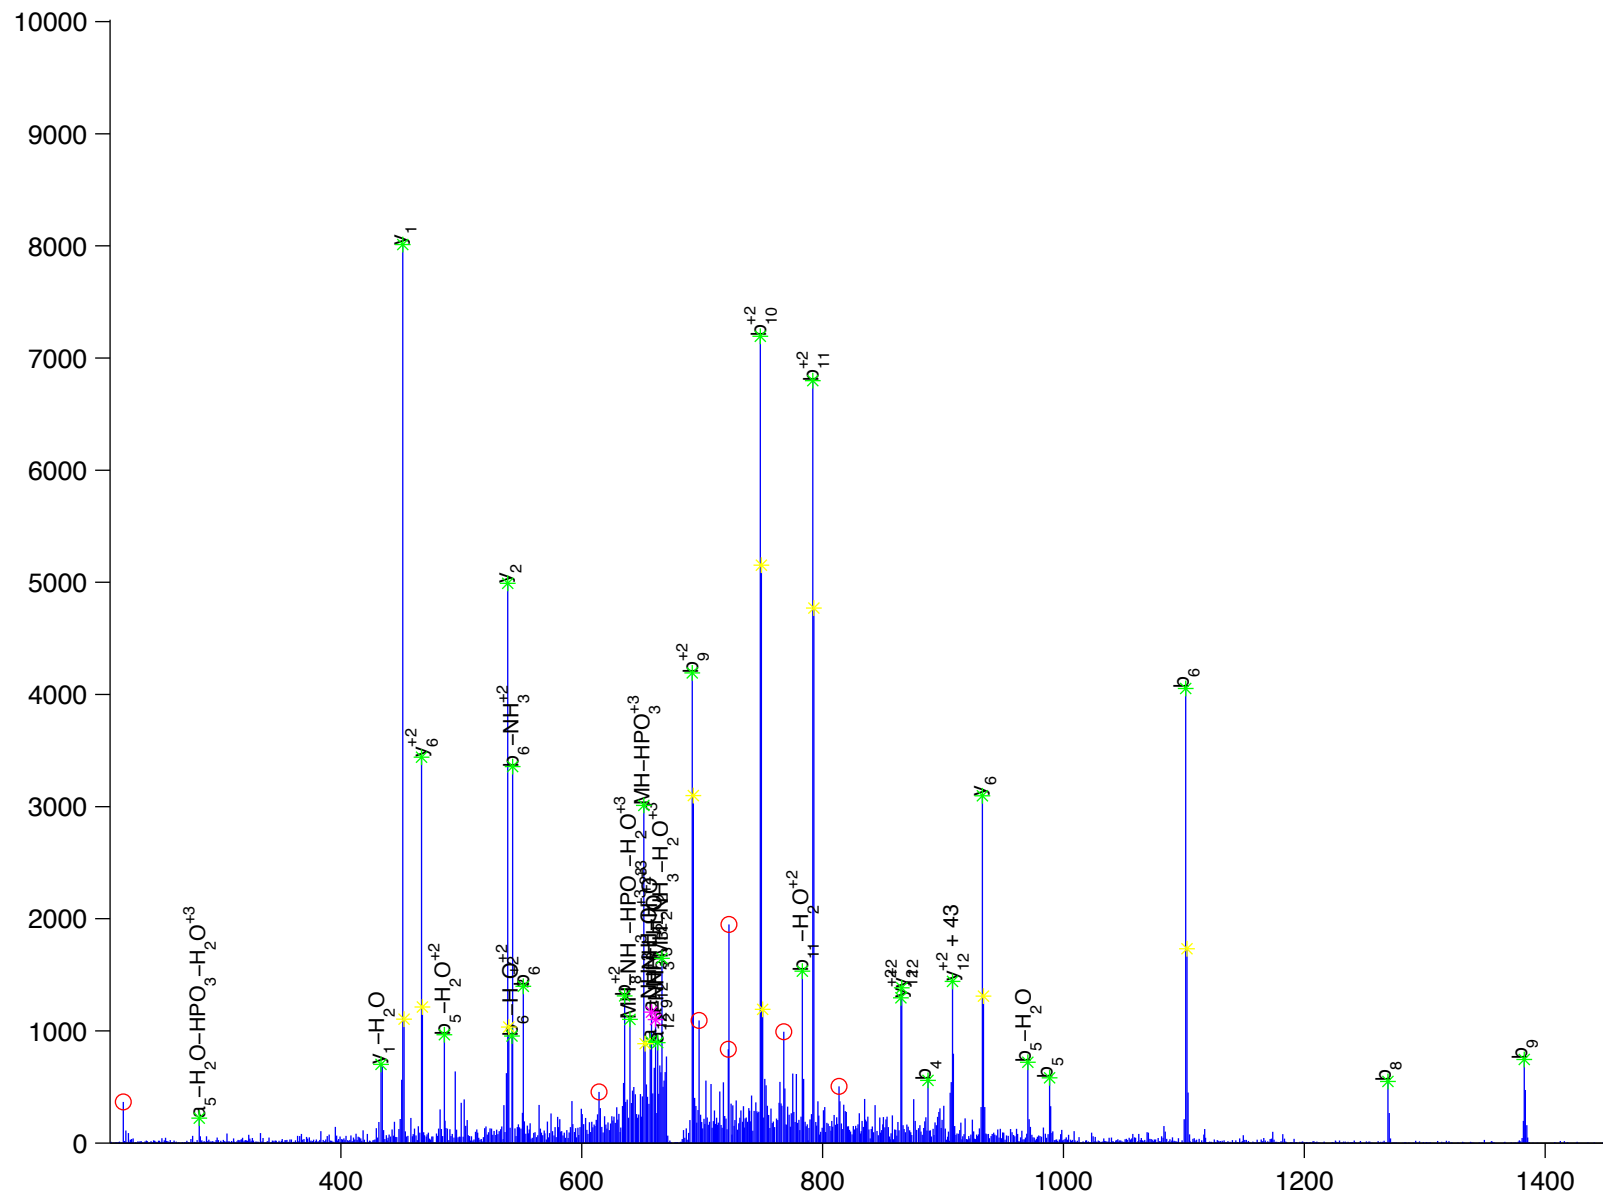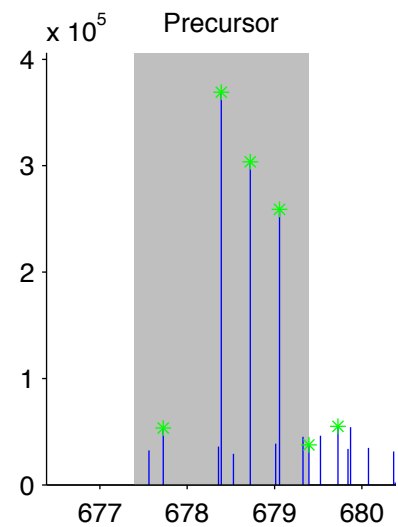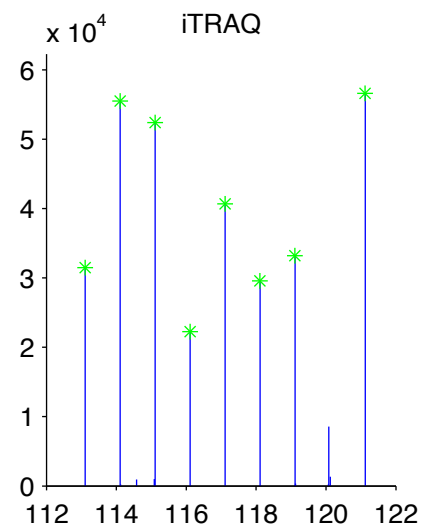

L [ W ] L [ E ] A [ M ] D [ G ] K [ E ] P [ I ] y [ T ] L [ P ] A [ I ] I [ S ] K

RIKEN cDNA 9030420J04 gene

Charge State: +4

Scan Number: 9674

File Name: 090806ptp1blivers\_M\_NC2.raw

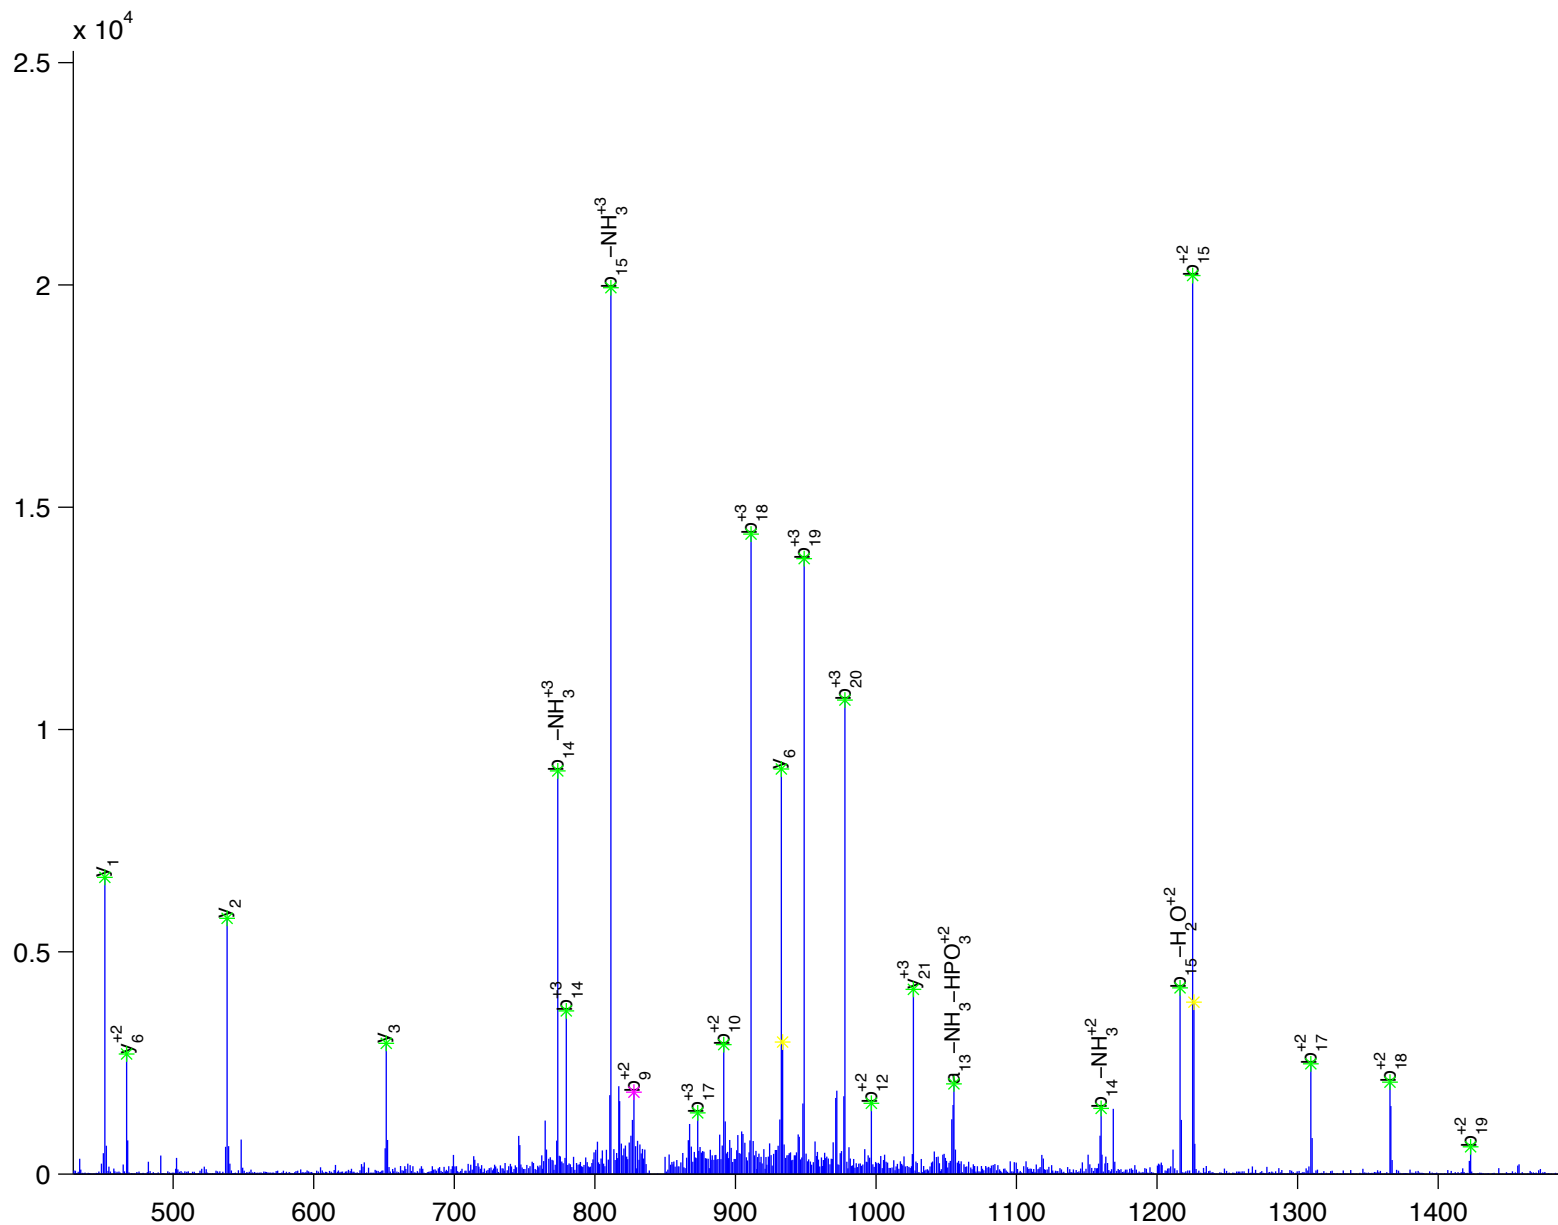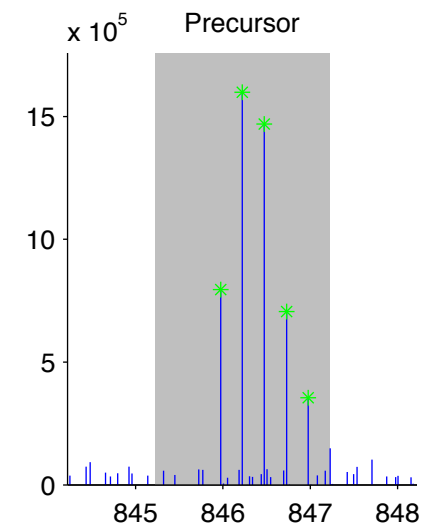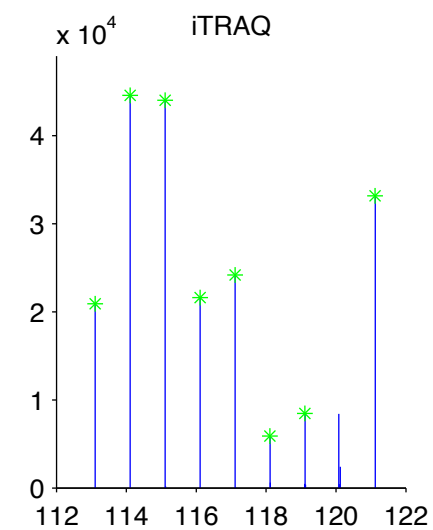



F [ D ] N [ L ] y [ G ] C [ R ]

S-adenosylhomocysteine hydrolase

Charge State: +2

Scan Number: 3991

File Name: 090728ptp1blivers\_M\_NC\_ins\_e.raw

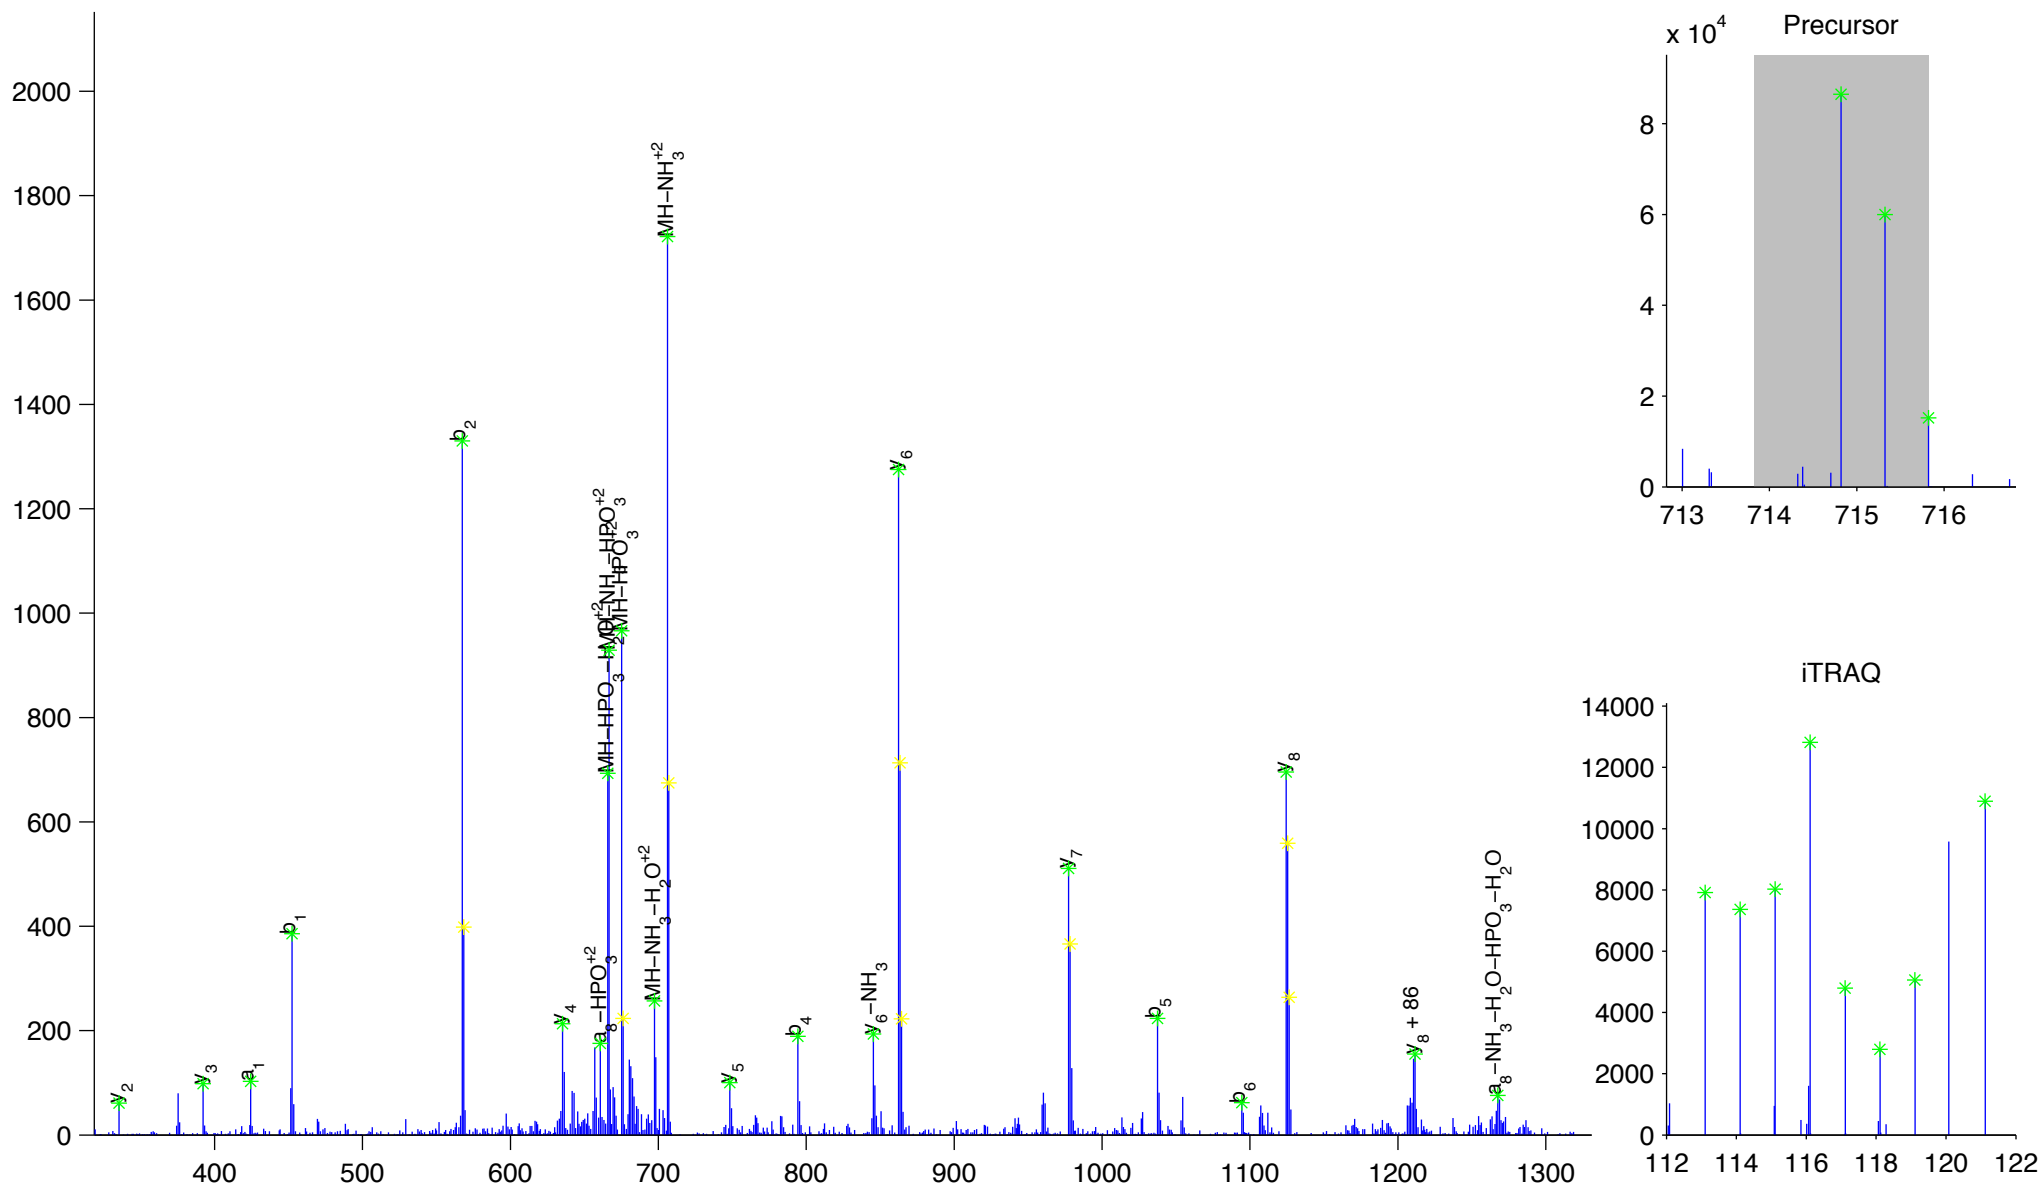

S [ K ] F [ D ] N [ L ] y [ G ] C [ R ]

S-adenosylhomocysteine hydrolase

Charge State: +3

Scan Number: 4477

File Name: 091130ptp1blivers\_hfd\_basal2.raw

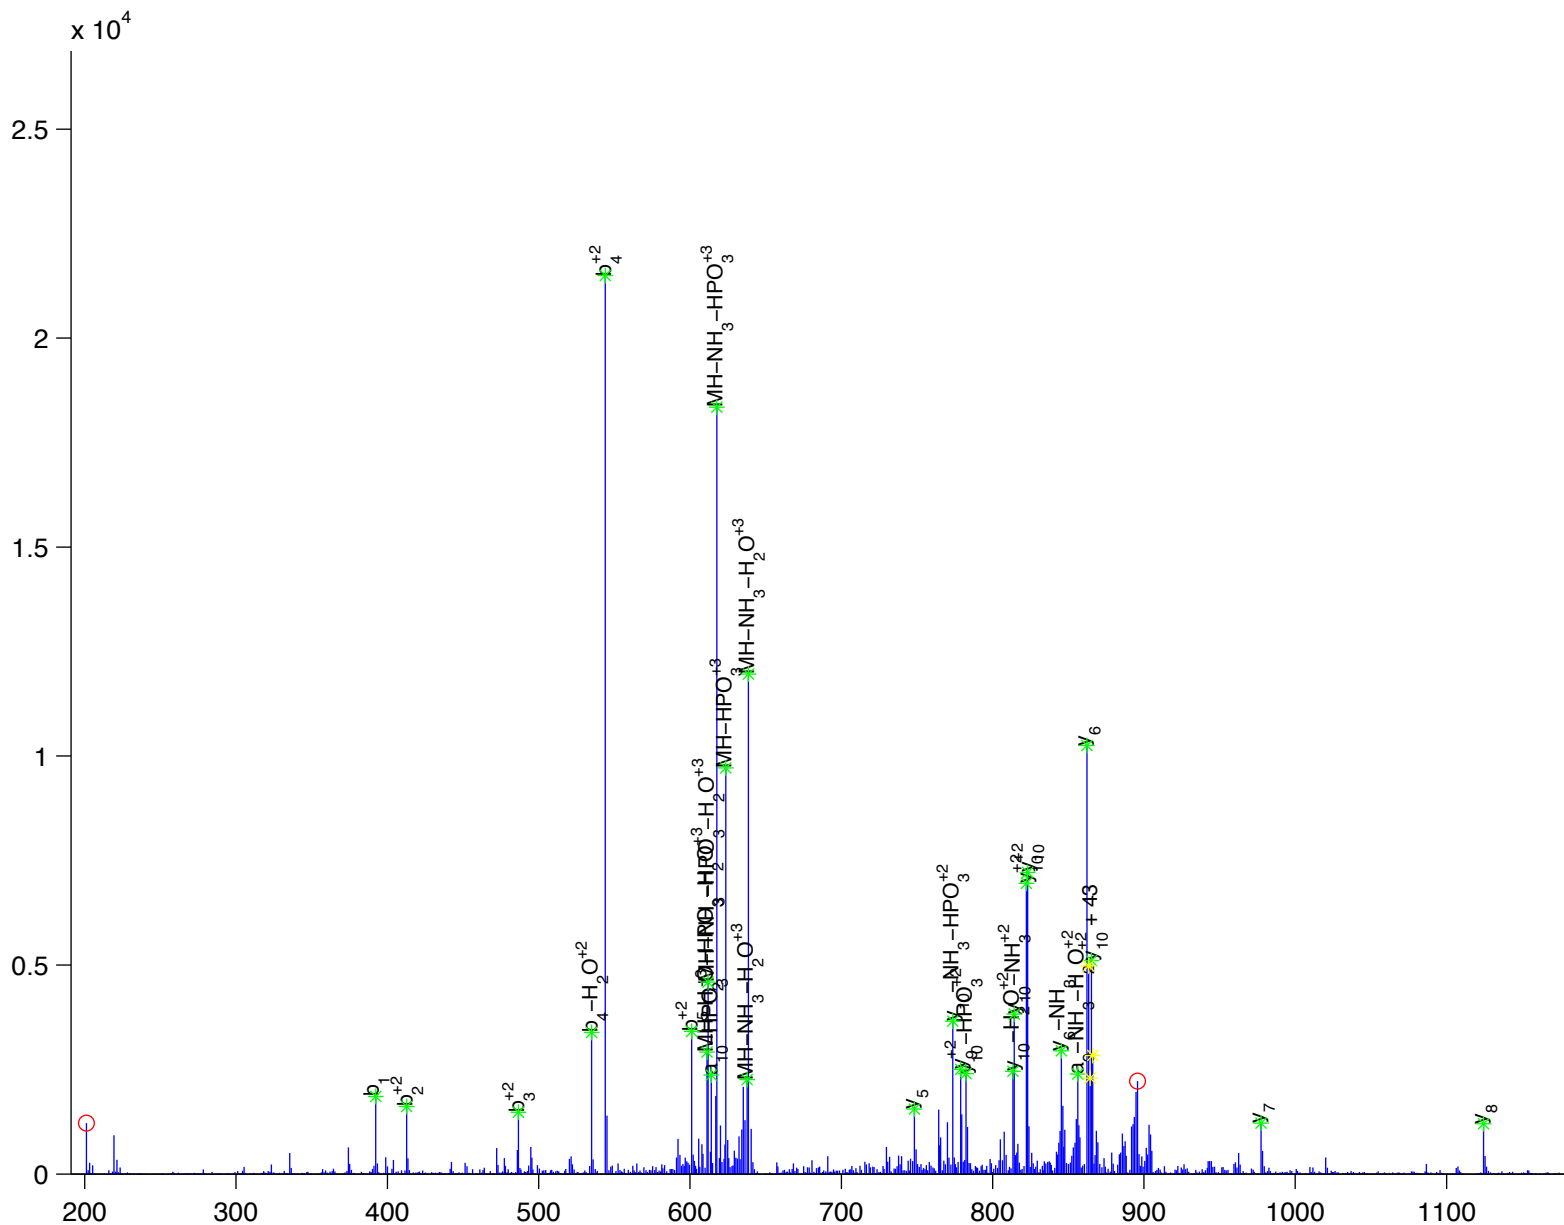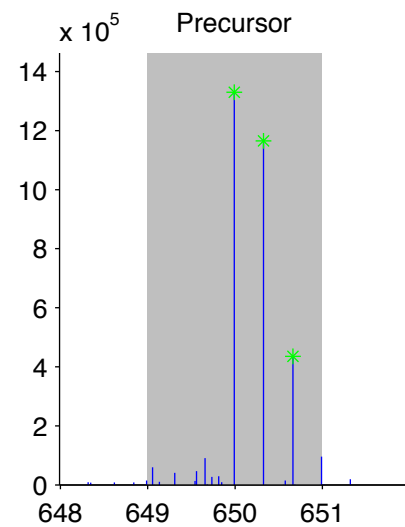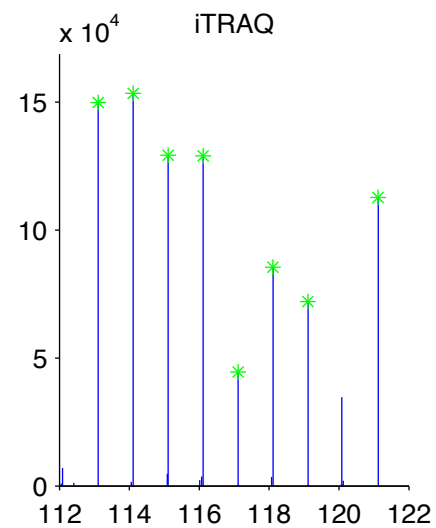

I [E] I [P] E [y] F [N] F [A] K

SA hypertension-associated homolog

Charge State: +3

Scan Number: 11598

File Name: 090807ptp1blivers\_M\_HFD\_basal.raw

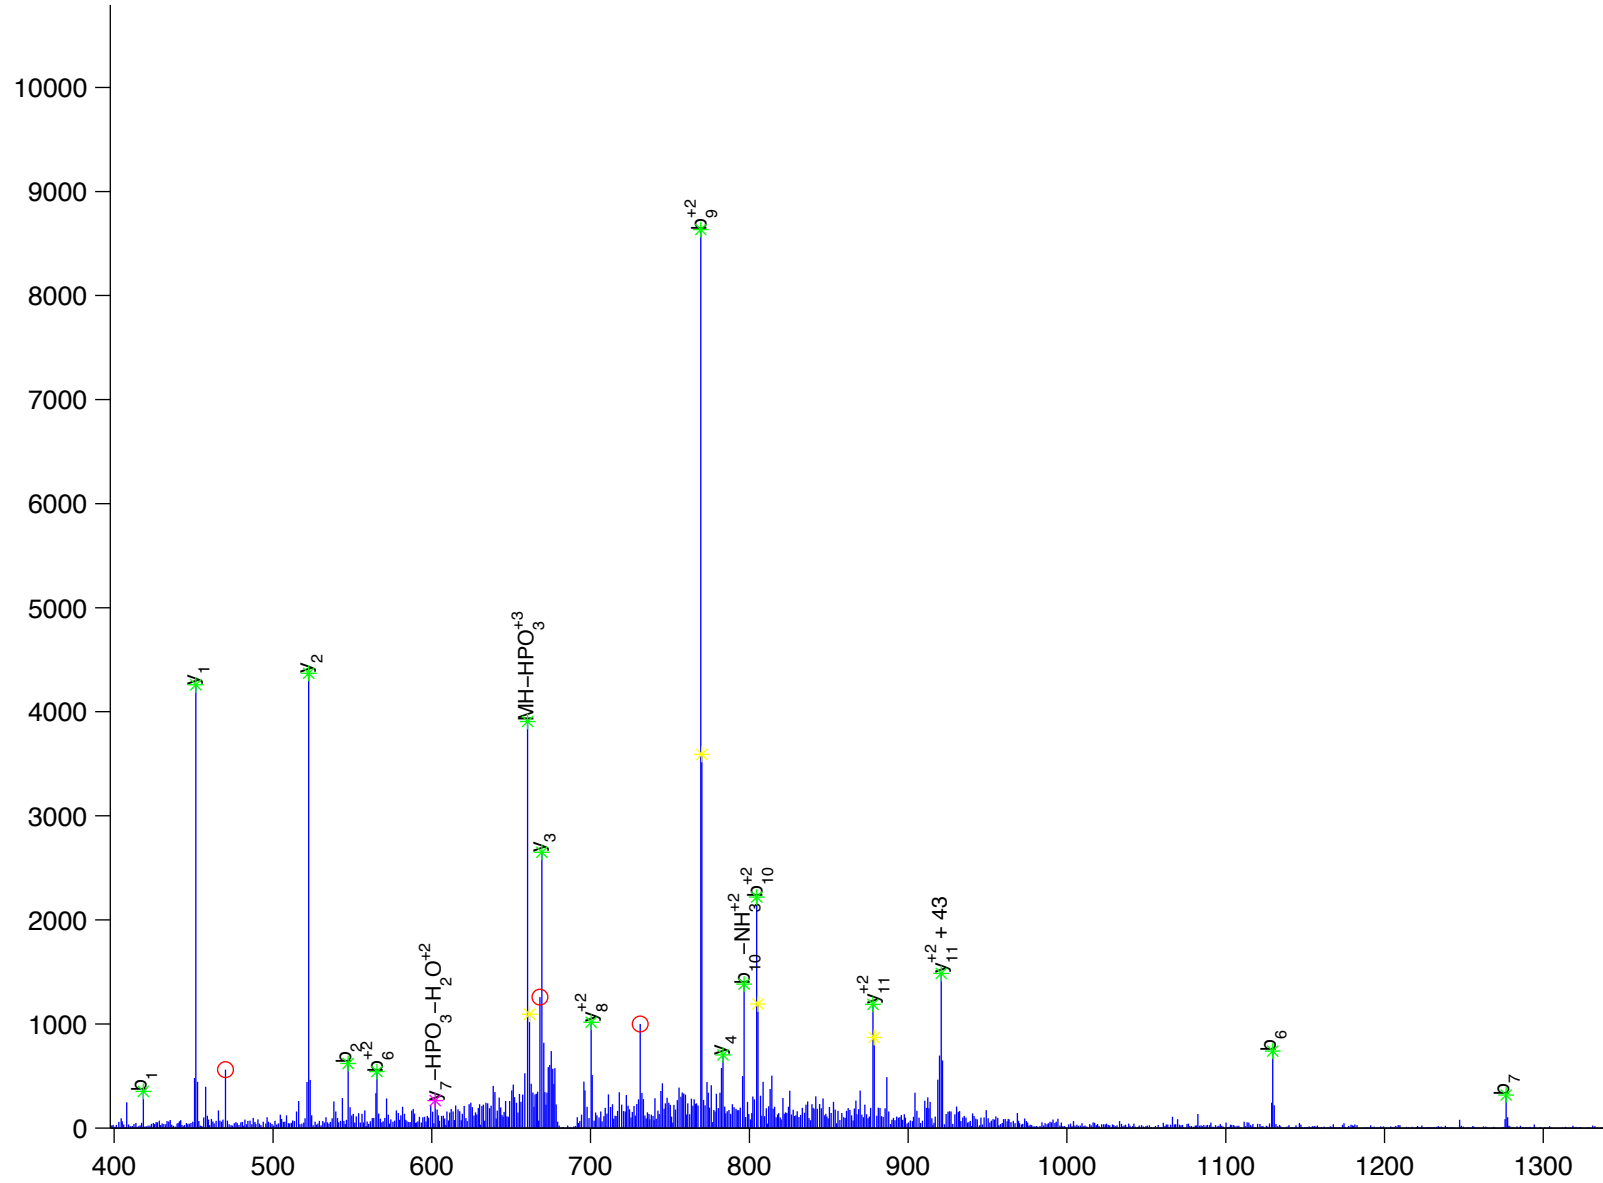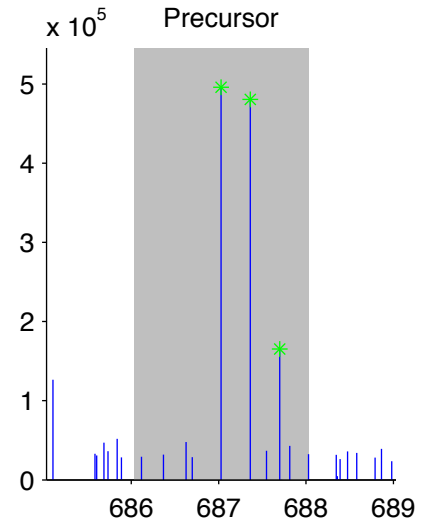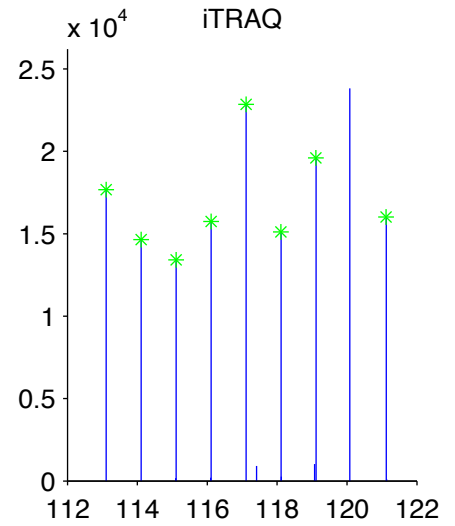

A [D] [D] y [F] [L] [L] R

SEC14 (*S. cerevisiae*)-like 2

Charge State: +2

Scan Number: 7207

File Name: 091130ptp1blivers\_hfd\_basal2.raw

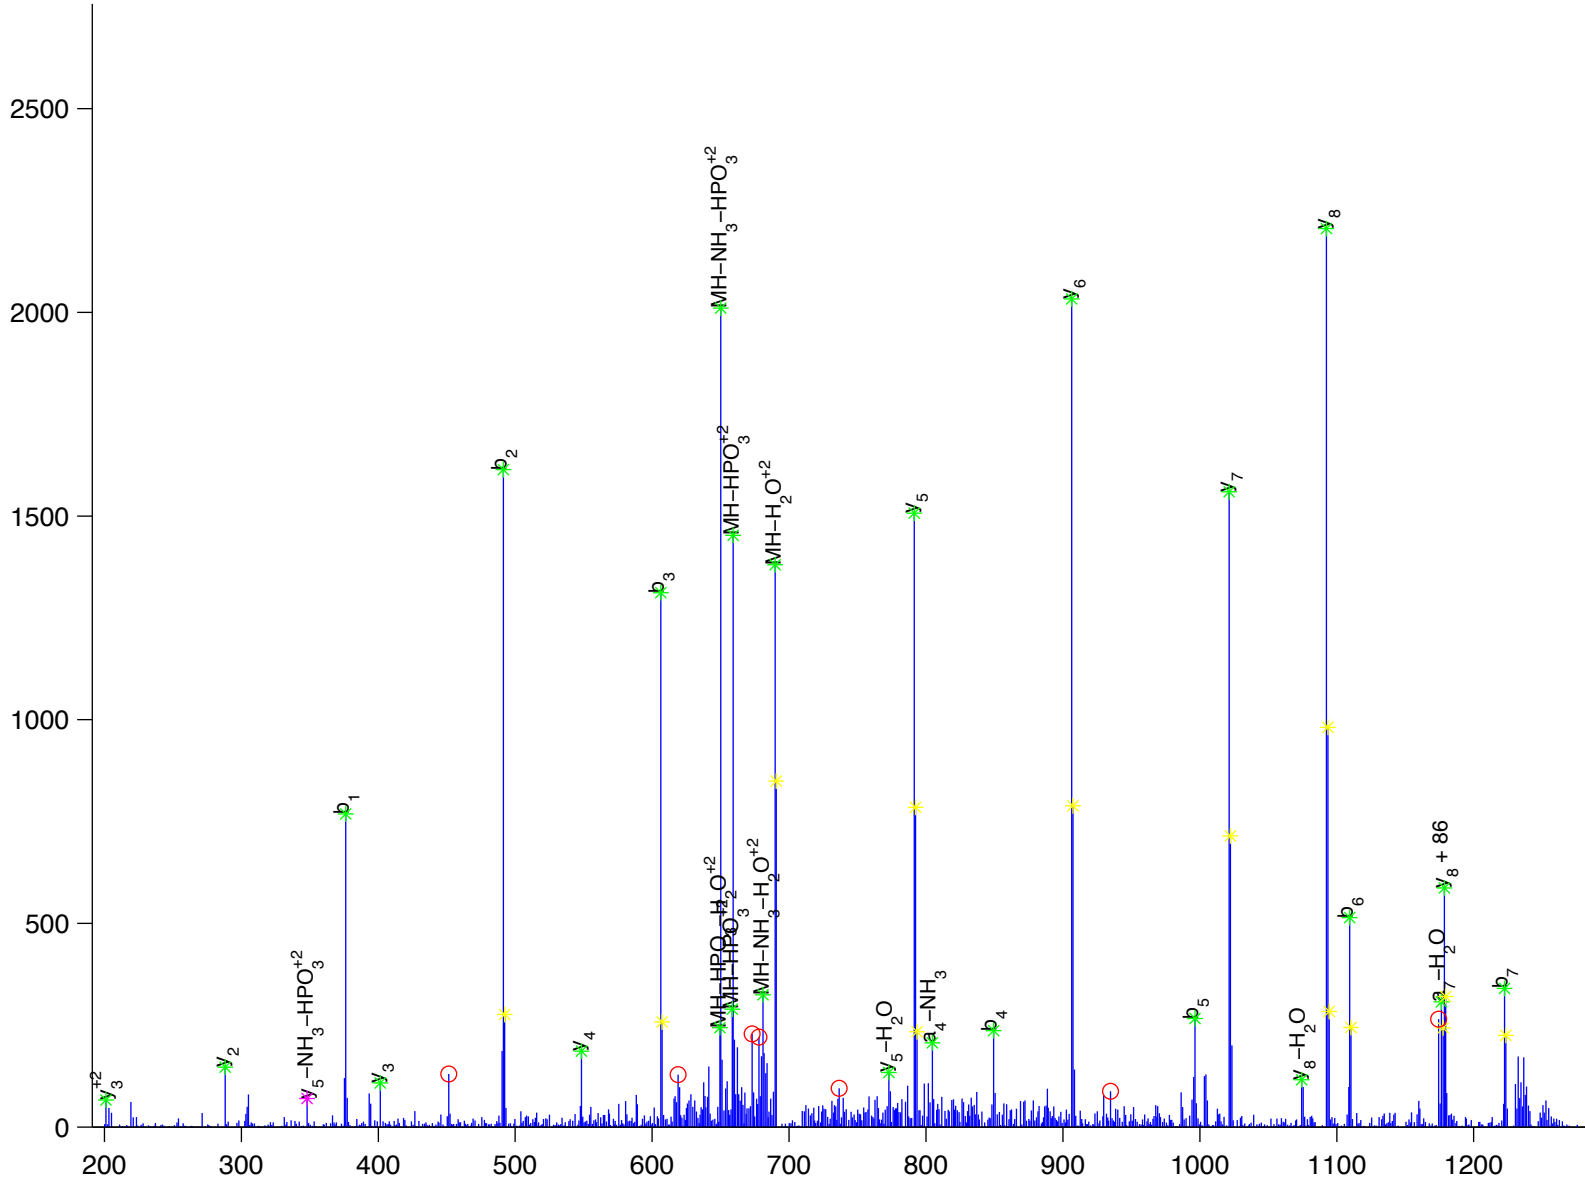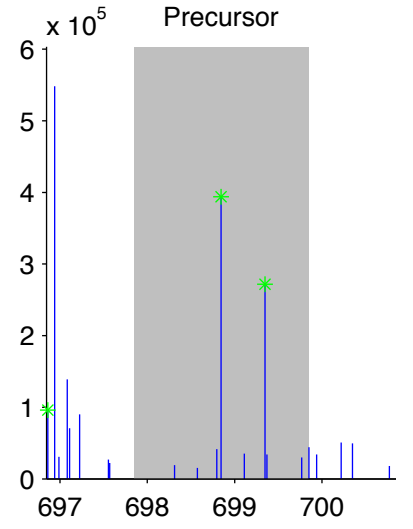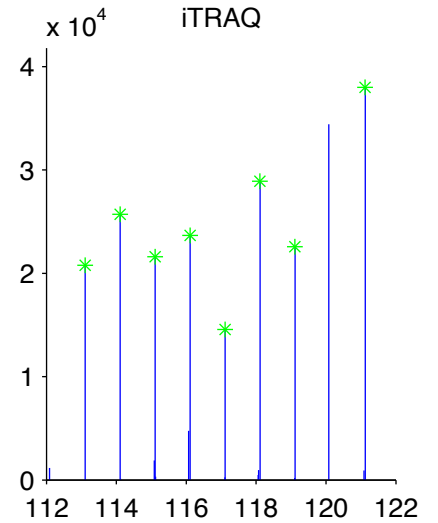

E [ N ] V [ Q ] D [ V ] L [ P ] T [ L ] P [ N ] P [ D ] D [ y ] F [ L ] L [ R ]

SEC14-like 2

Charge State: +3

Scan Number: 7668

File Name: 090728ptp1blivers\_M\_NC\_ins\_e.raw

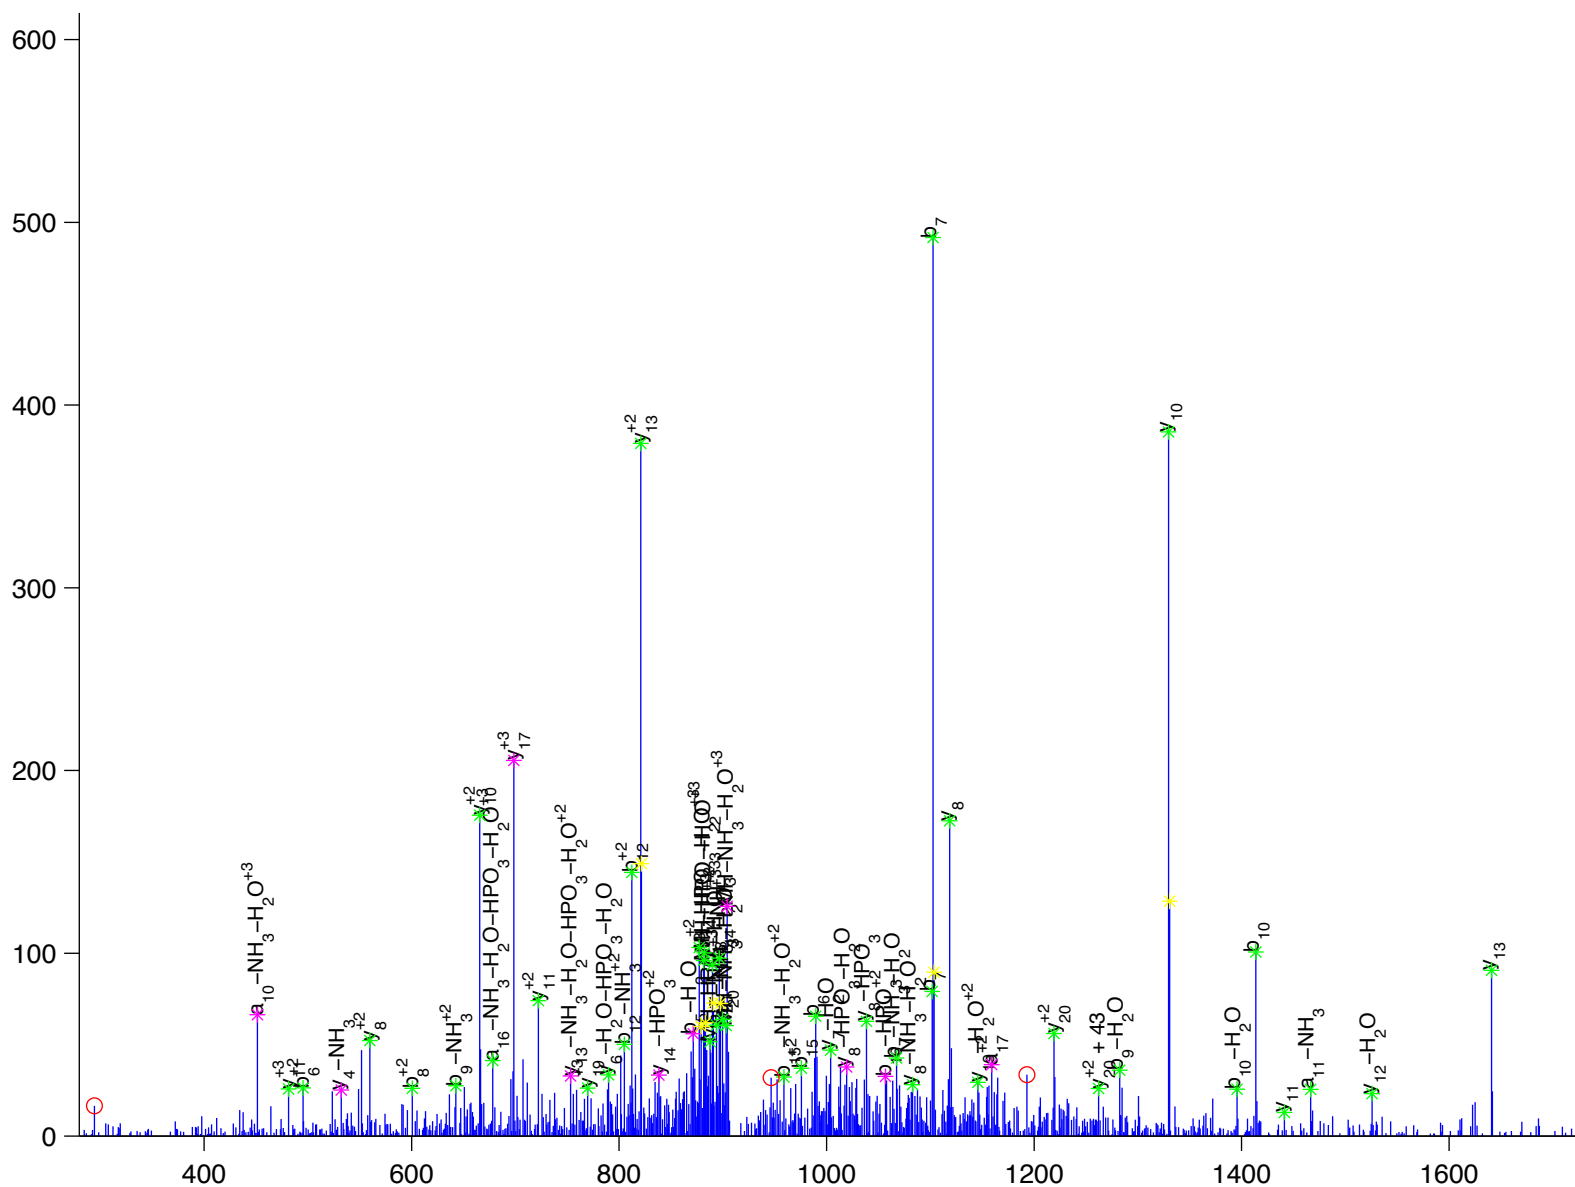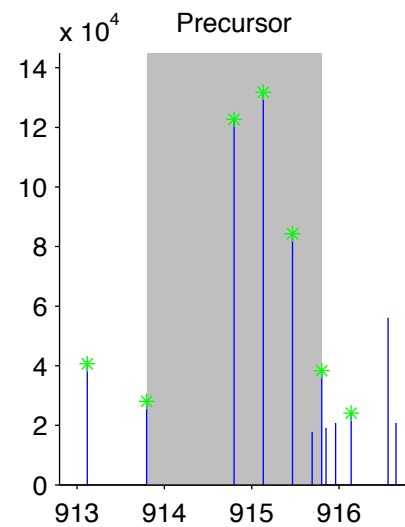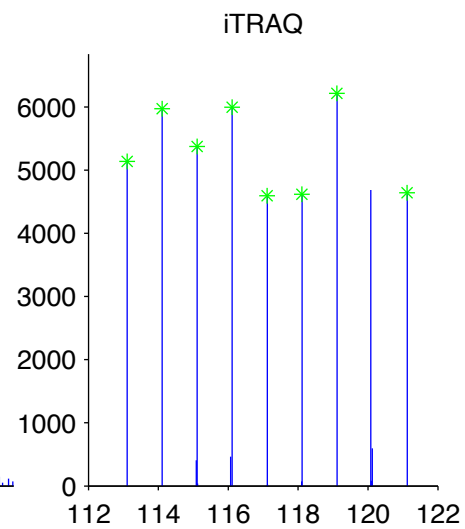

F R E N V Q D V L P T L P N P D D y F L L R

SEC14-like 2

Charge State: +4

Scan Number: 9512

File Name: 090806ptp1blivers\_M\_NC2.raw

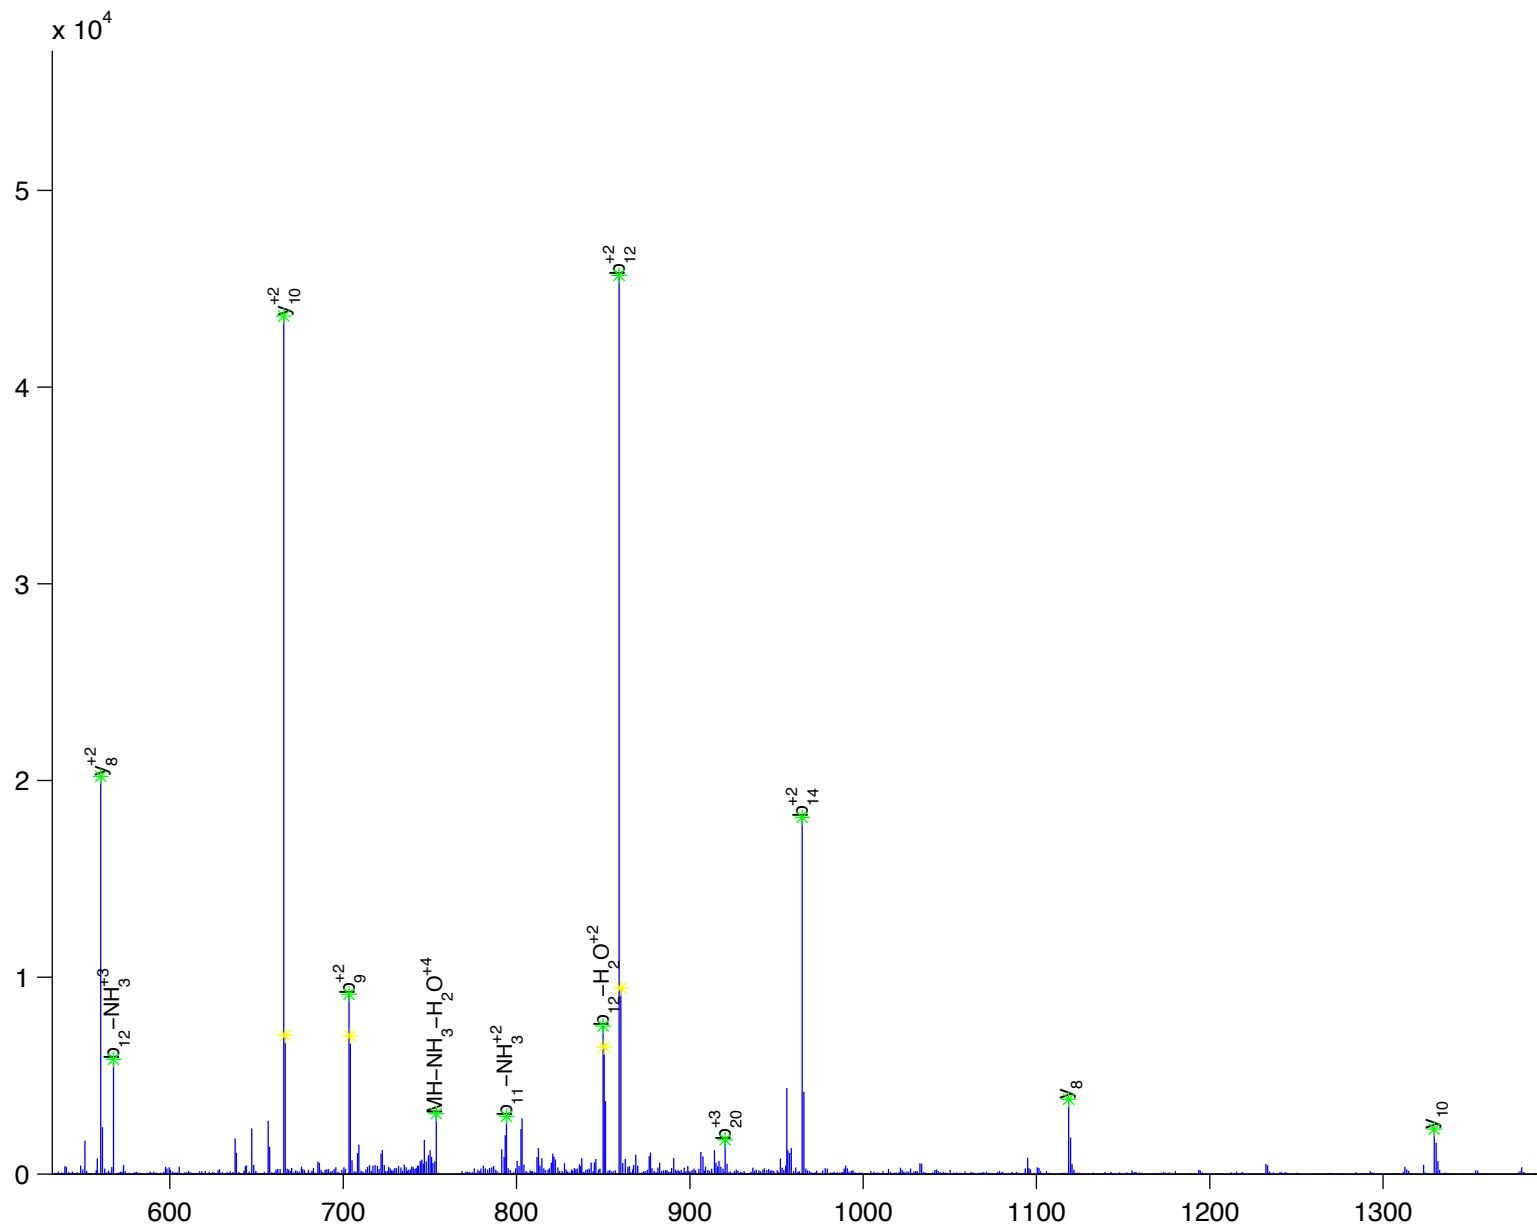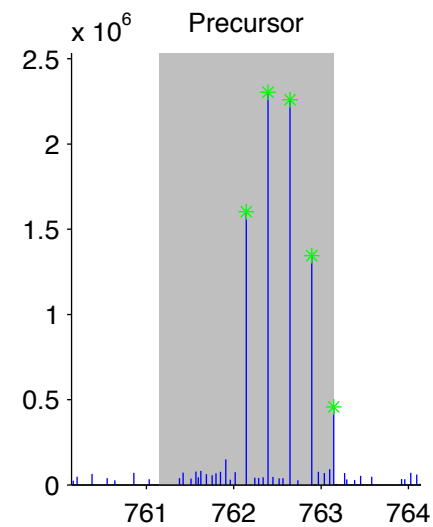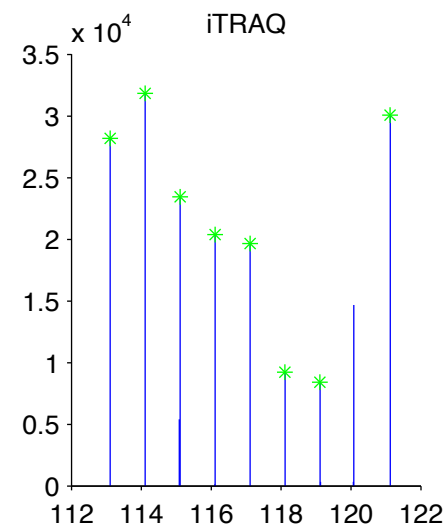

Q[Q]P[T]Q[F]I[N]P[E]T[P]G[y]V[G]F[A]N[L]P[N]Q[V]H[R]

septin 2

Charge State: +4

Scan Number: 6997

File Name: 091130ptp1blivers\_hfd\_basal2.raw

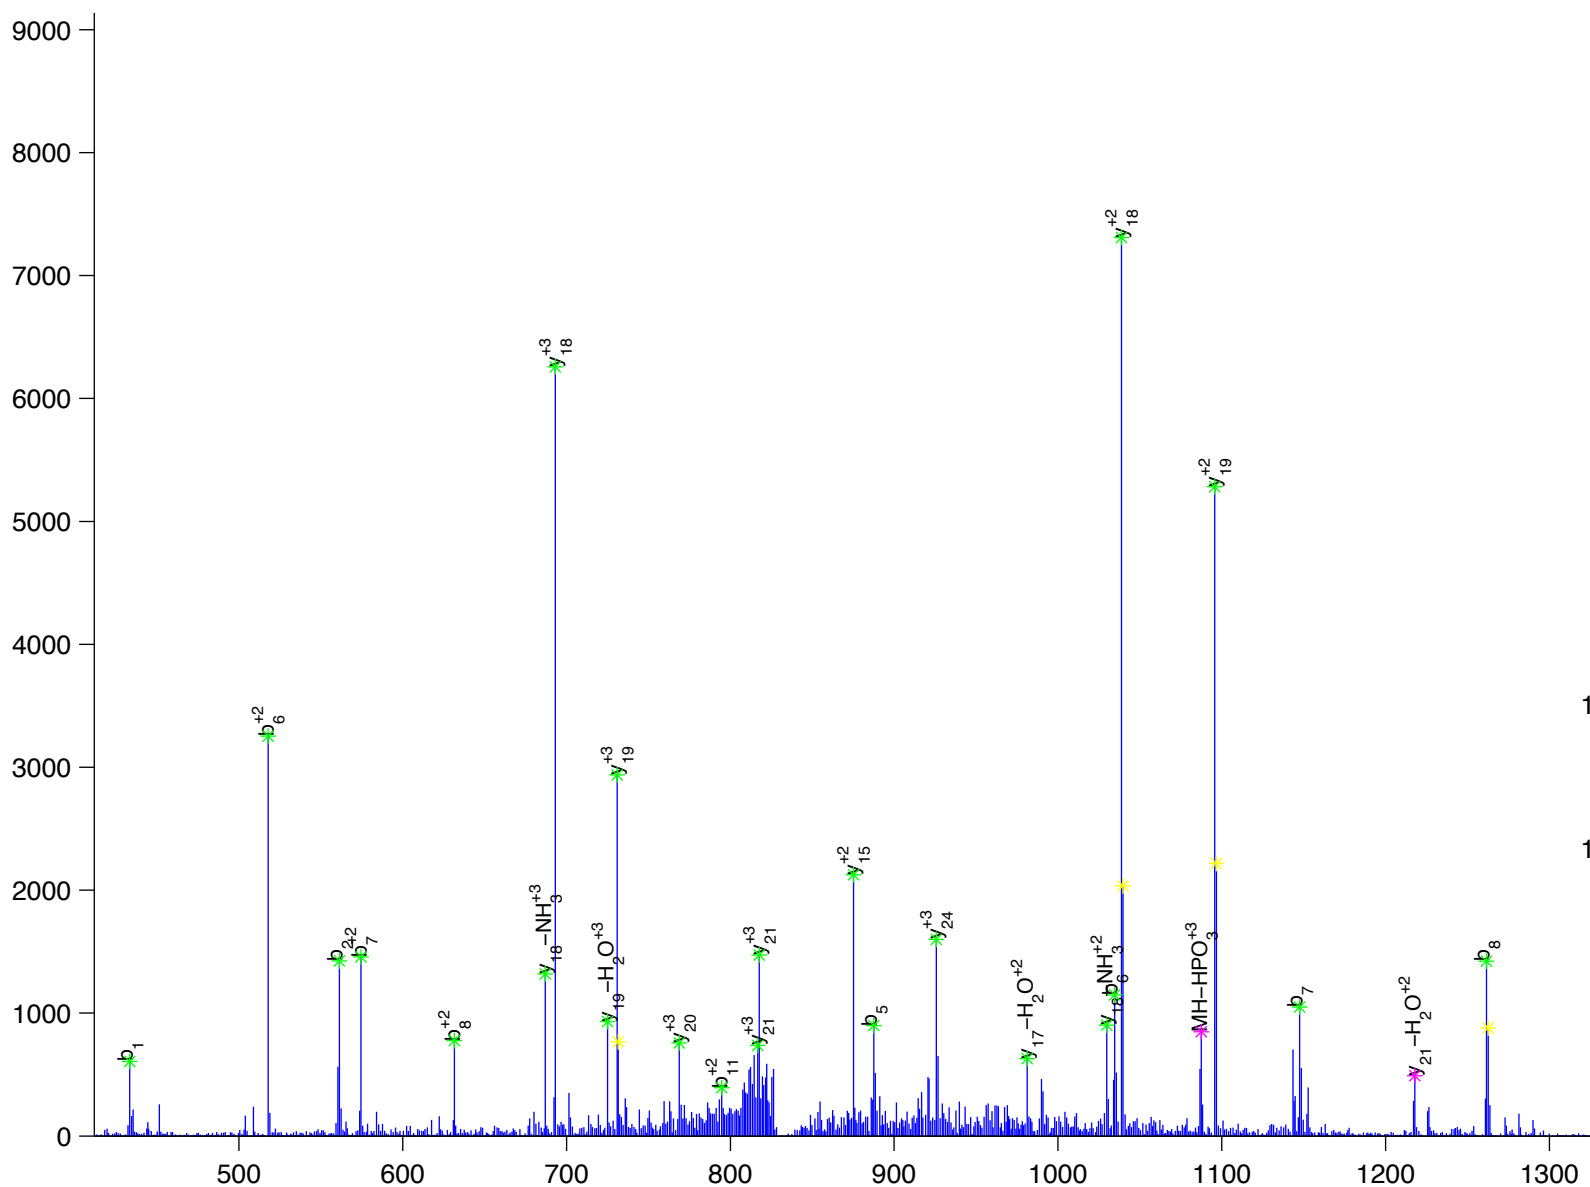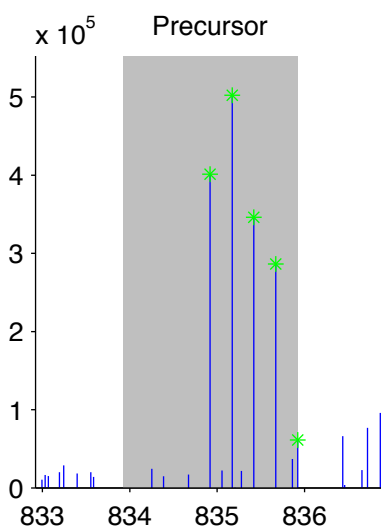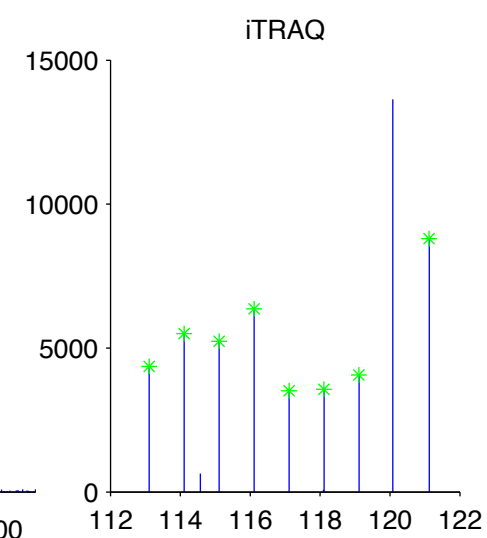

y [ S ] [ E ] [ G ] [ Y ] [ P ] [ G ] [ Q ] [ R ]

serine hydroxymethyltransferase 1 (soluble)

Charge State: +2

Scan Number: 4213

File Name: 090807ptp1blivers\_M\_HFD\_basal.raw

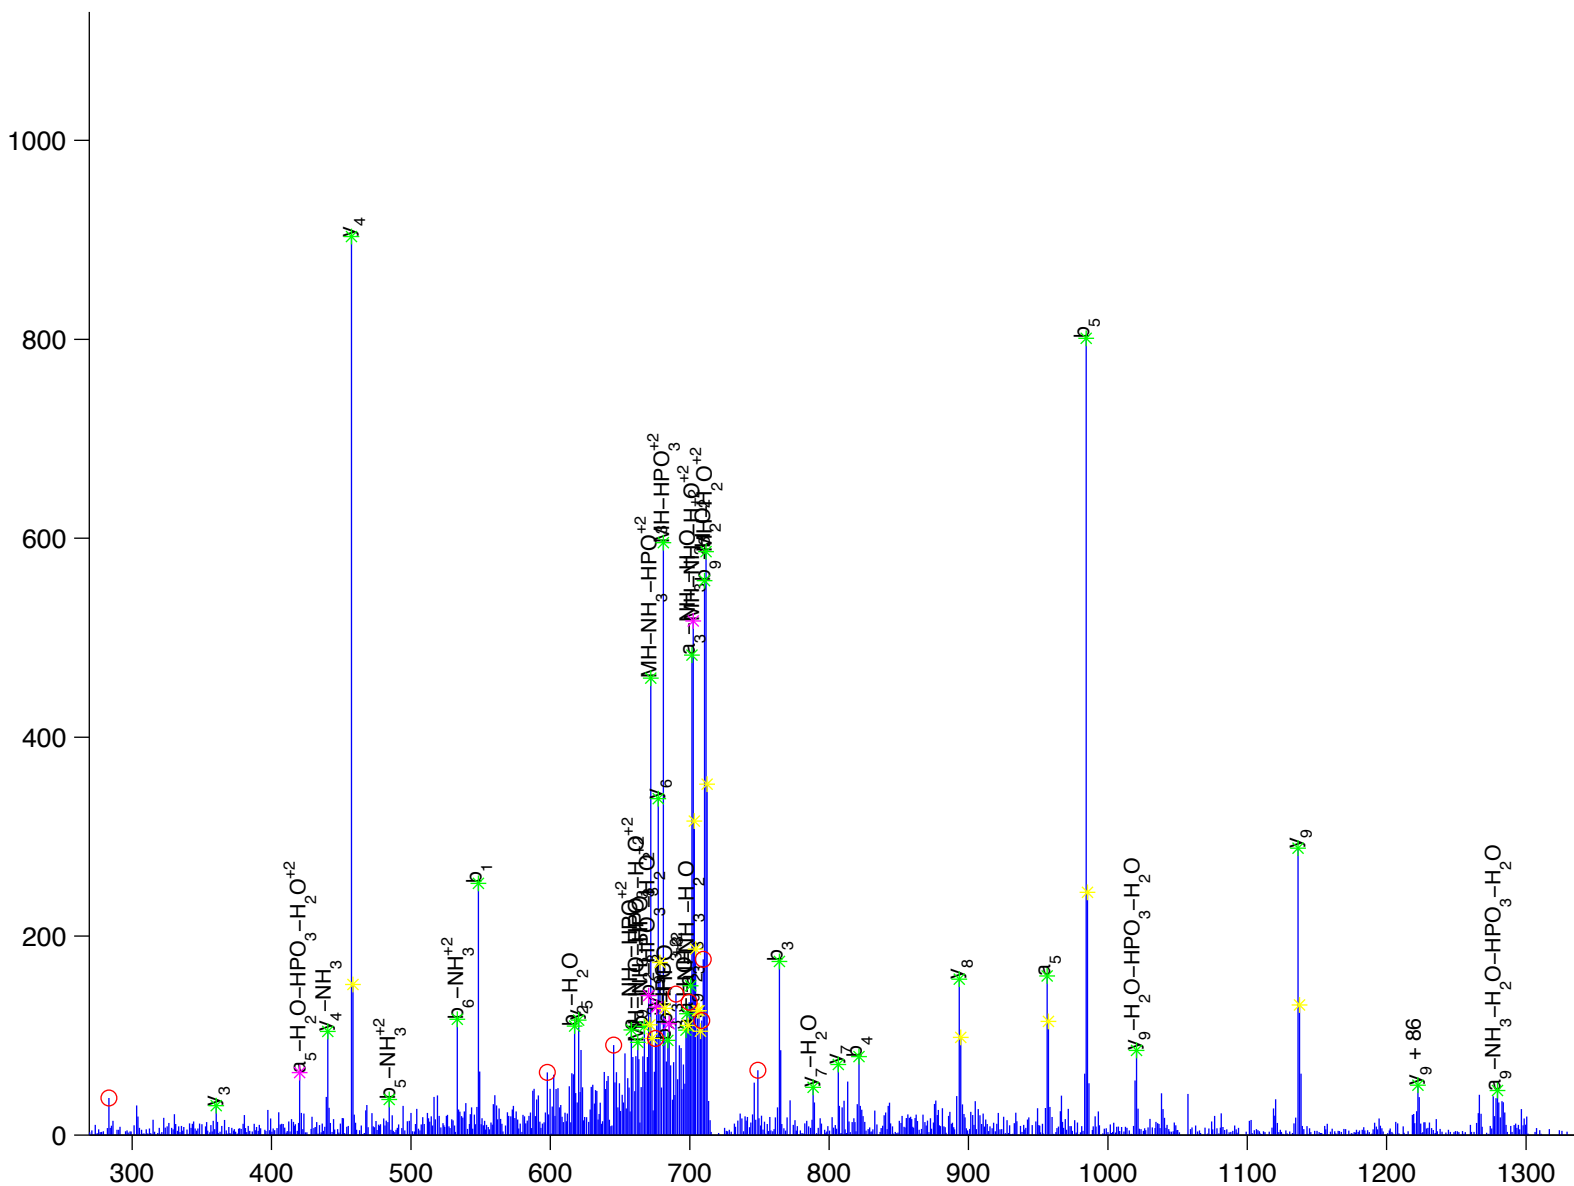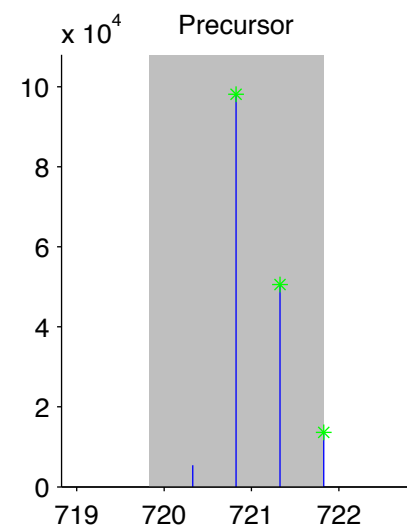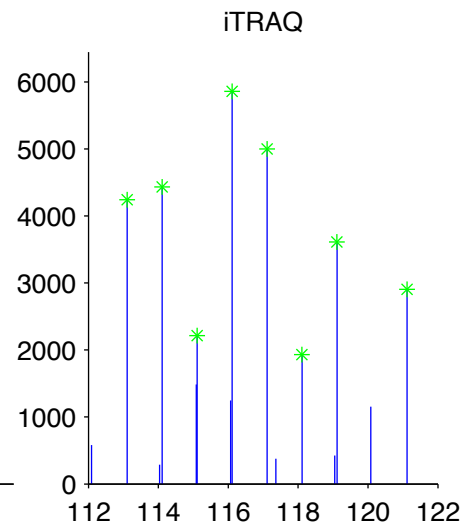



D  
[ S ]  
[ D ]  
[ A ]  
[ E ]  
[ V ]  
y  
[ S ]  
[ I ]  
[ I ]  
K

serine hydroxymethyltransferase 1 (soluble)

Charge State: +3

Scan Number: 6047

File Name: 091130ptp1blivers\_hfd\_basal2.raw

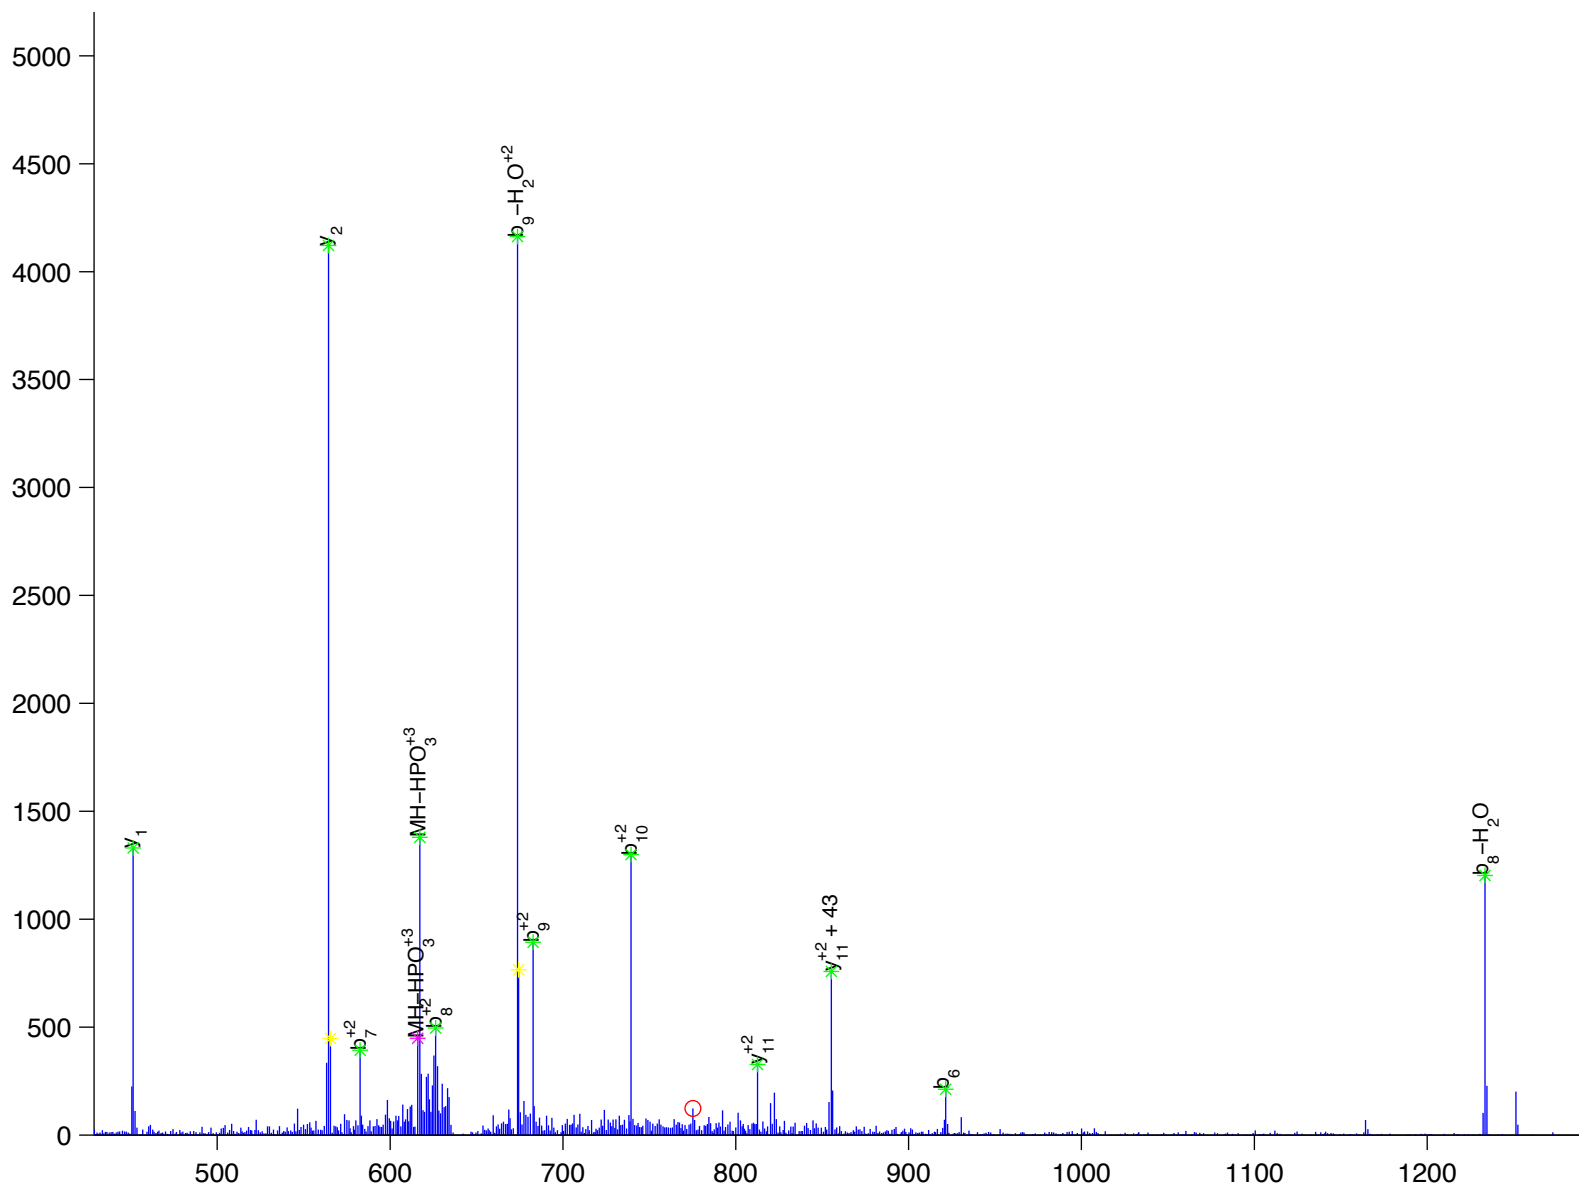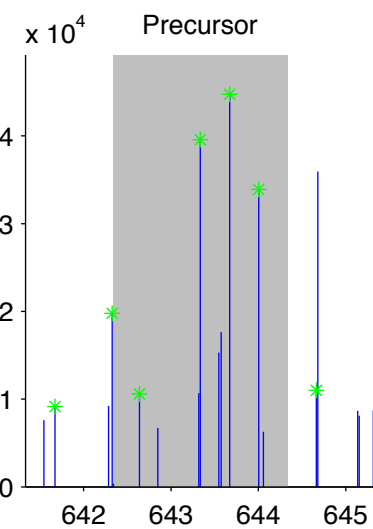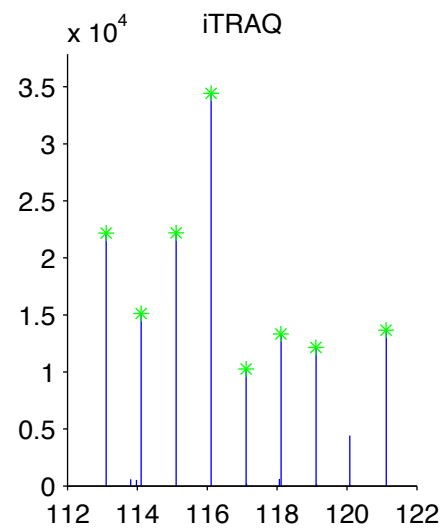

T [ A ] [ A ] [ E ] [ L ] [ E ] [ A ] [ A ] [ G ] [ D ] y [ V ] K

SH2 domain containing 3C

Charge State: +3

Scan Number: 4442

File Name: 100905ptp1blivers\_ncHFD\_basal.raw

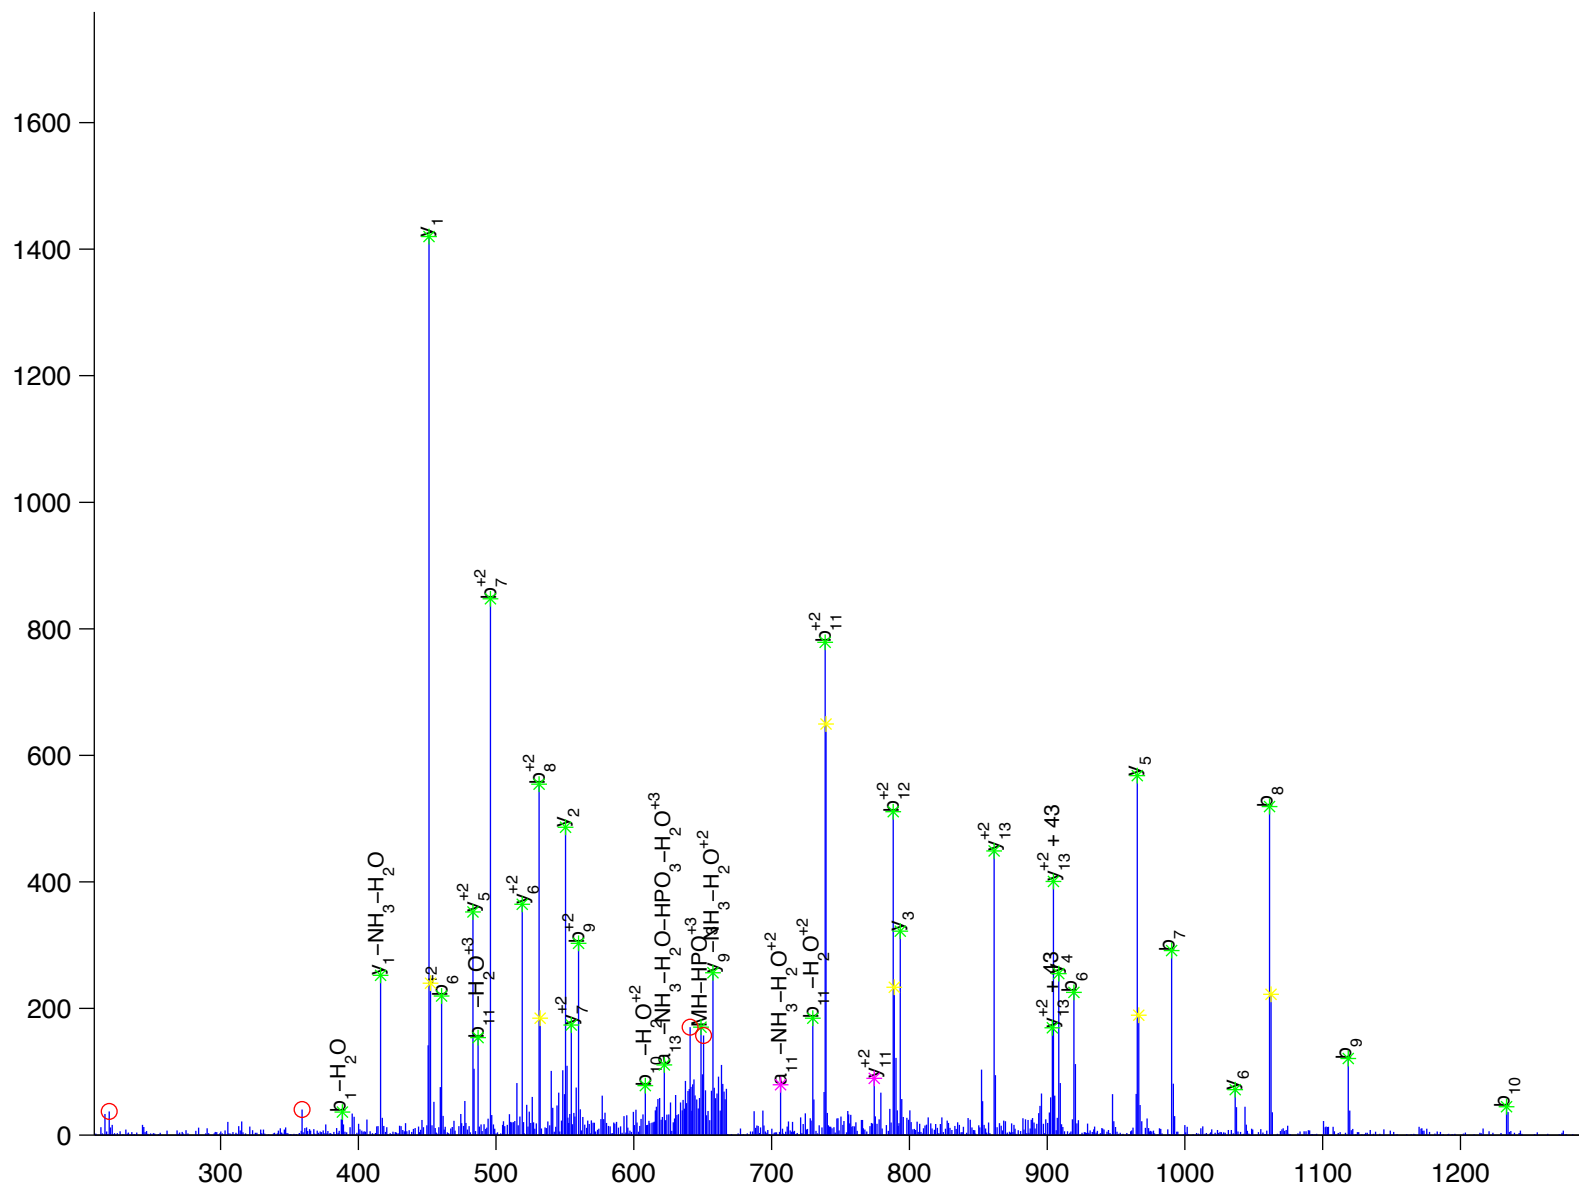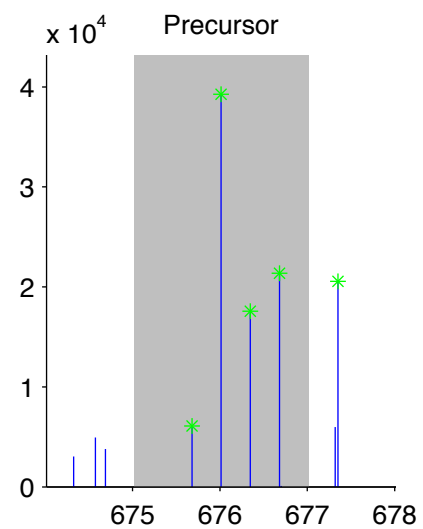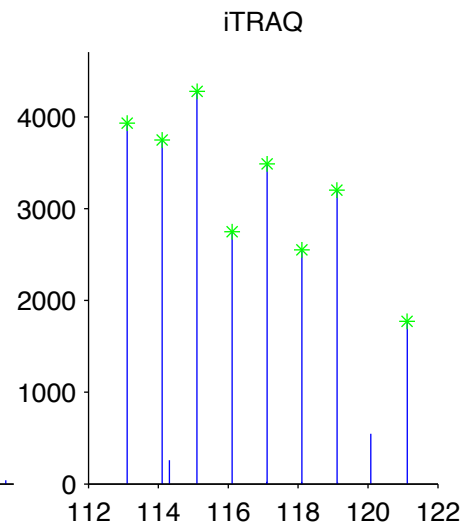

G[E]P[E]A[L]y[A]A[V]T[K]

SH3 domain protein 1B

Charge State: +3

Scan Number: 1013

File Name: HJ072909\_HFD\_E1\_2.raw

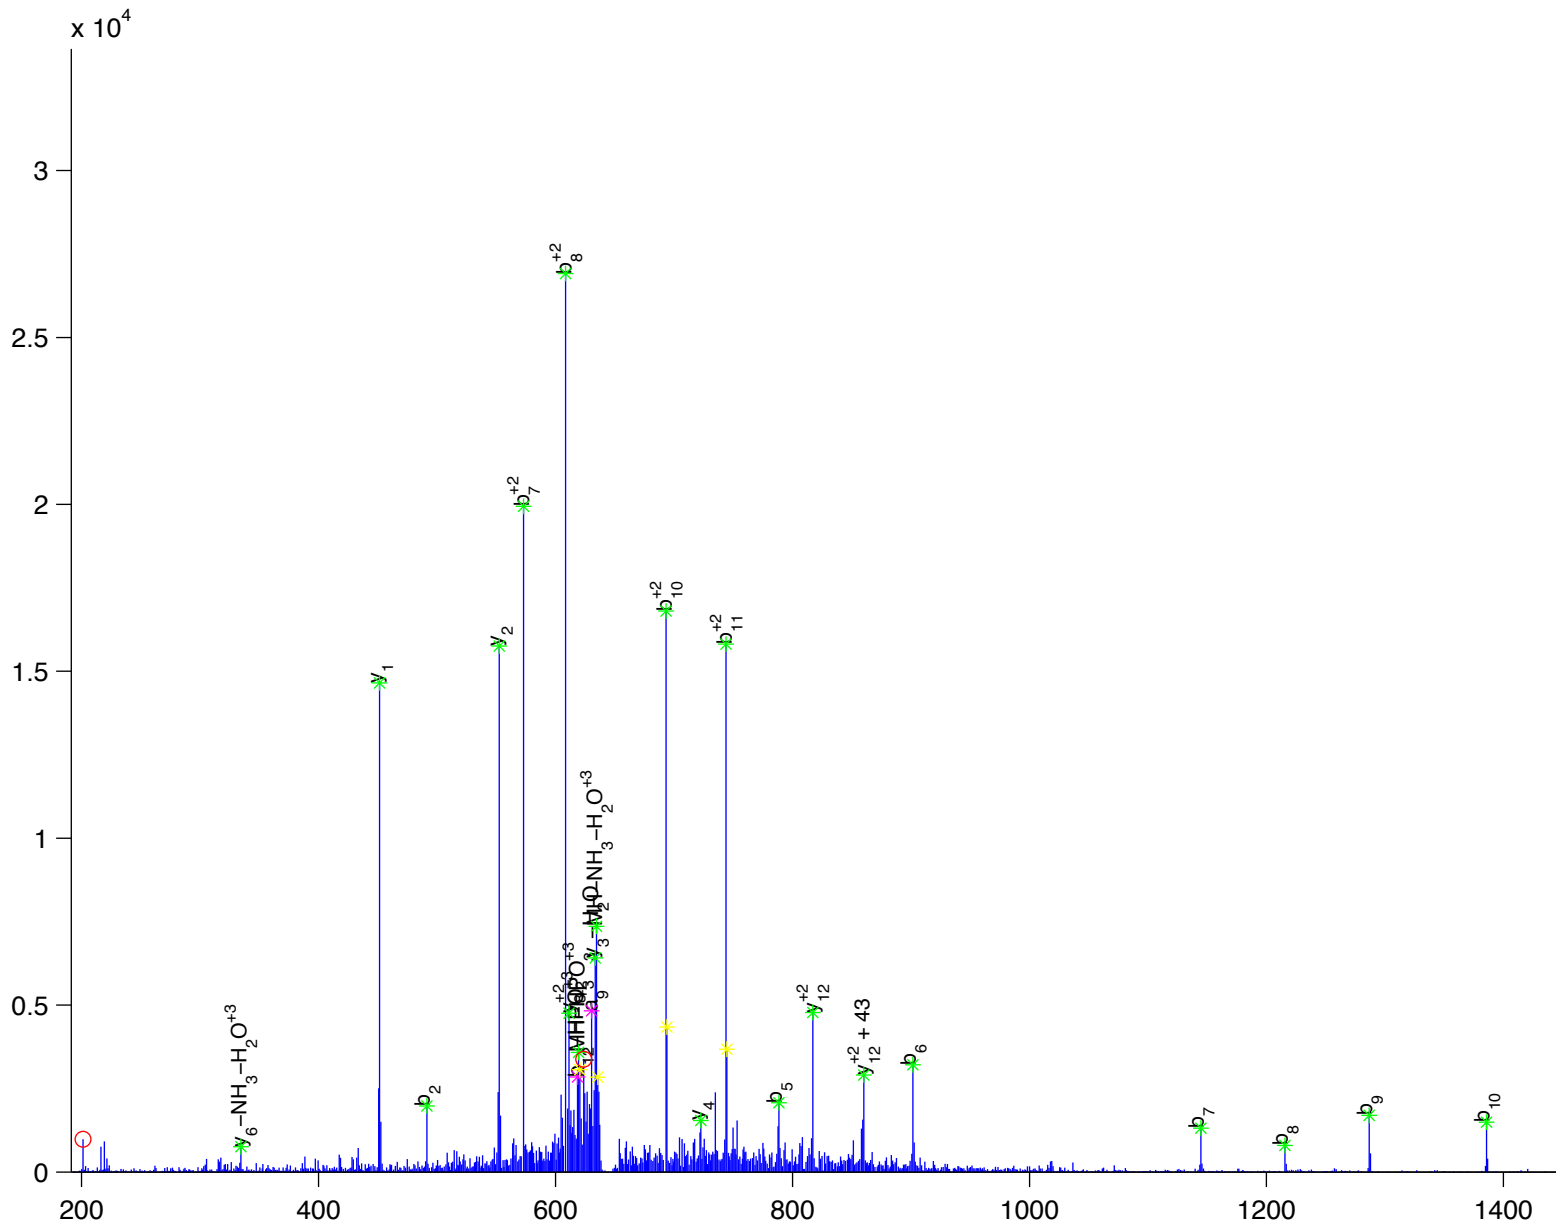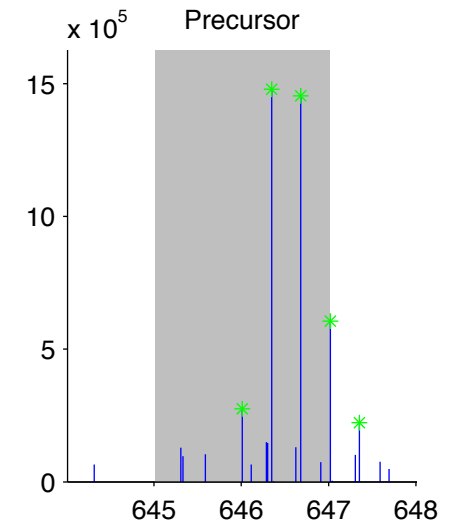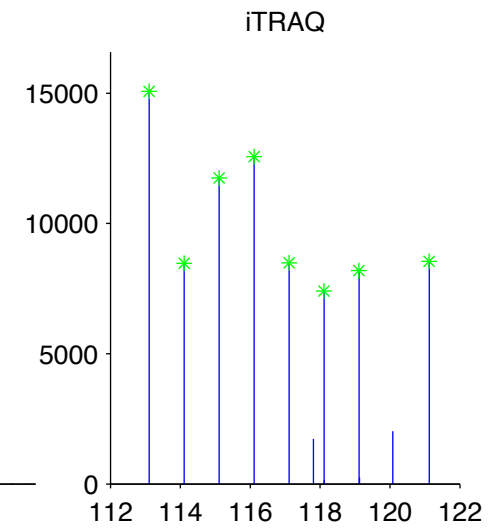

$y$ 

|   |   |   |   |   |   |   |   |   |   |   |   |   |   |   |   |   |   |   |   |   |   |
|---|---|---|---|---|---|---|---|---|---|---|---|---|---|---|---|---|---|---|---|---|---|
| C | R | P | E | S | Q | E | H | P | E | A | D | P | G | S | A | A | P | Y | L | K |   |
| [ | [ | [ | [ | [ | [ | [ | [ | [ | [ | [ | [ | [ | [ | [ | [ | [ | [ | [ | [ | [ | [ |

signal transducer and activator of transcription 3 isoform 3

Charge State: +4

Scan Number: 4359

File Name: 091130ptp1blivers\_hfd\_basal2.raw

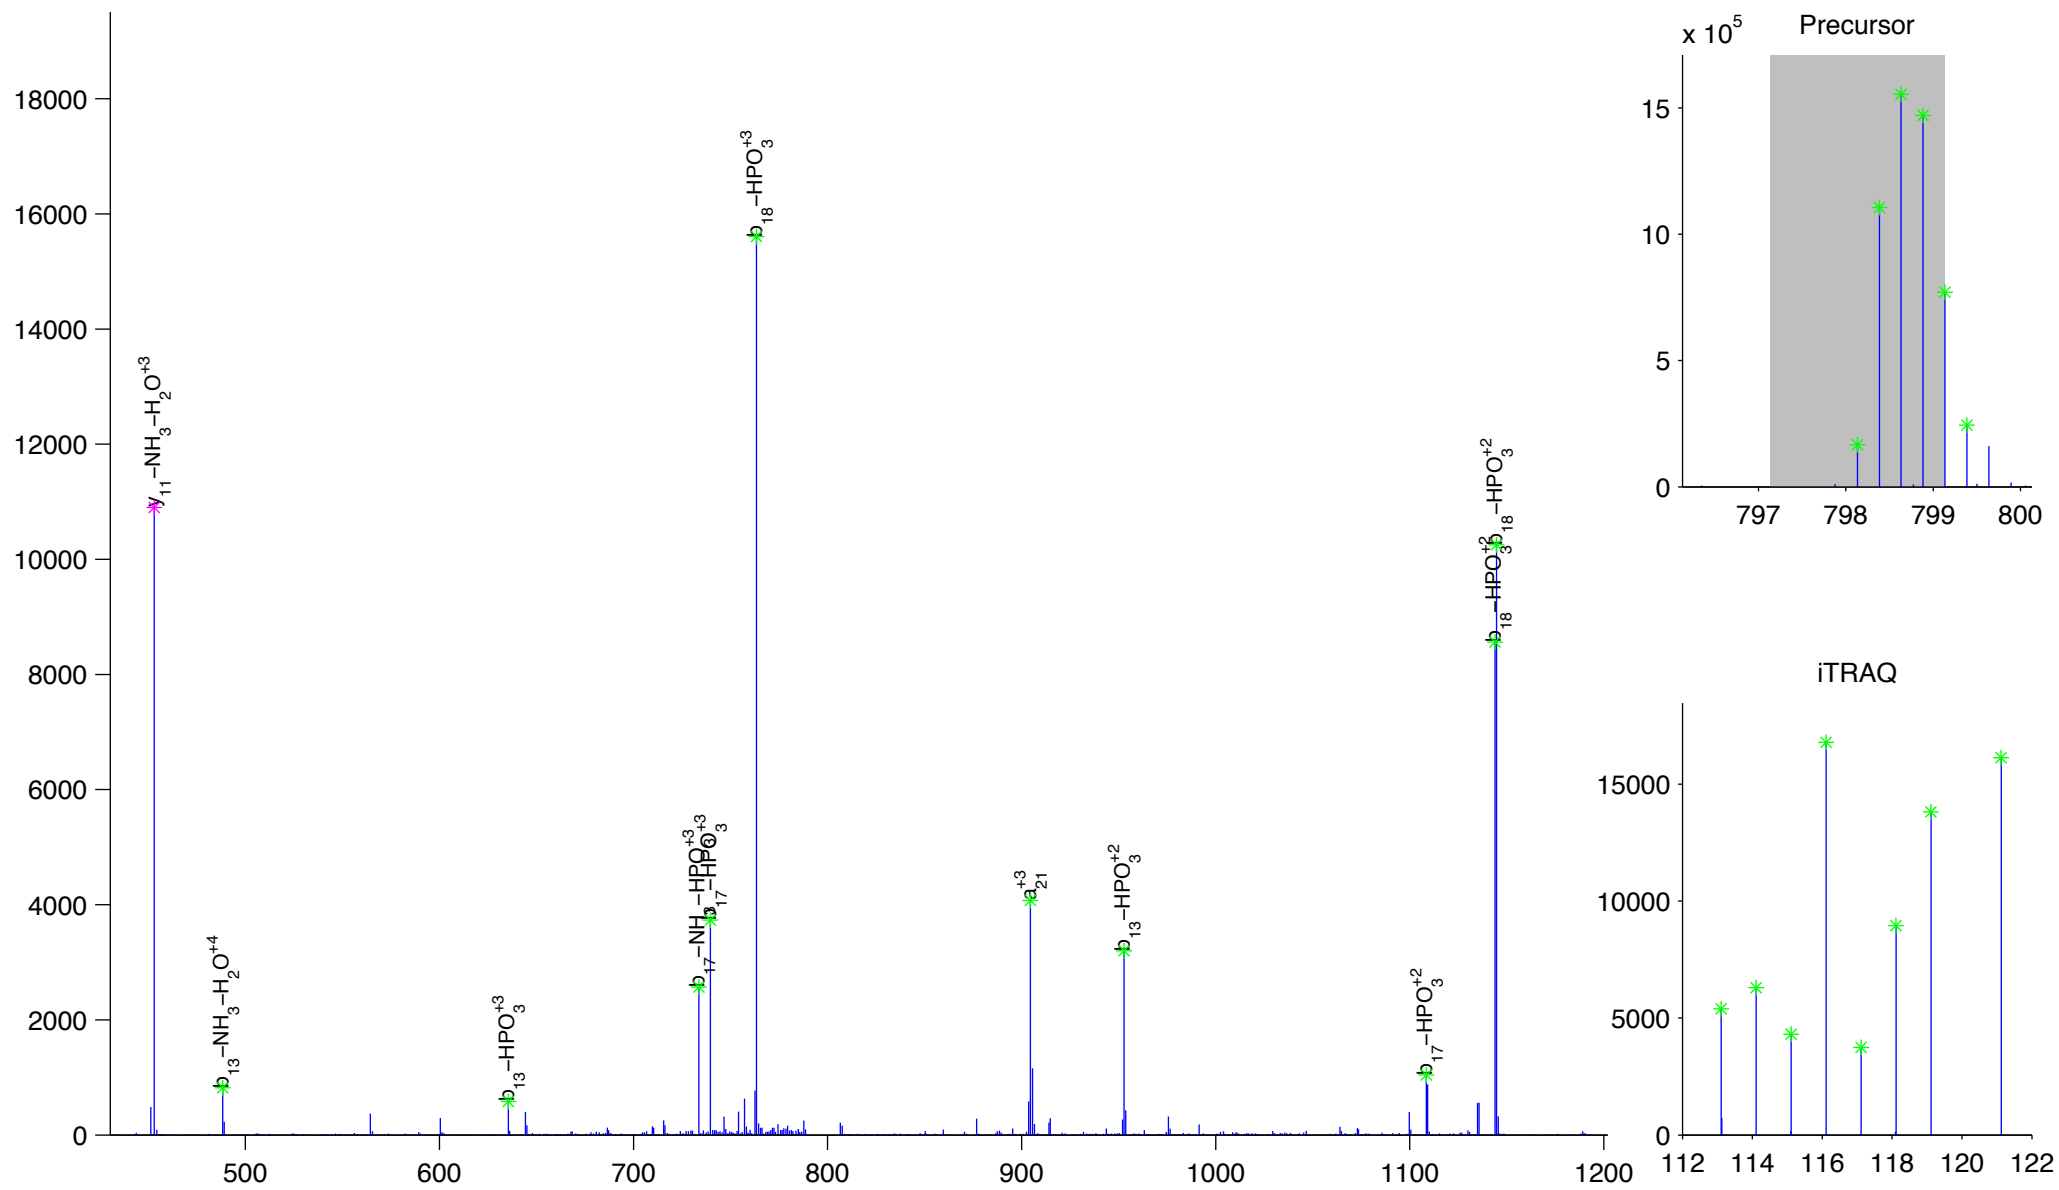

A [L] [V] [P] [F] [L] [L] [D] [E] [D] y [E] K

signal-transducing adaptor protein-2

Charge State: +3

Scan Number: 9036

File Name: 091130ptp1blivers\_hfd\_basal2.raw

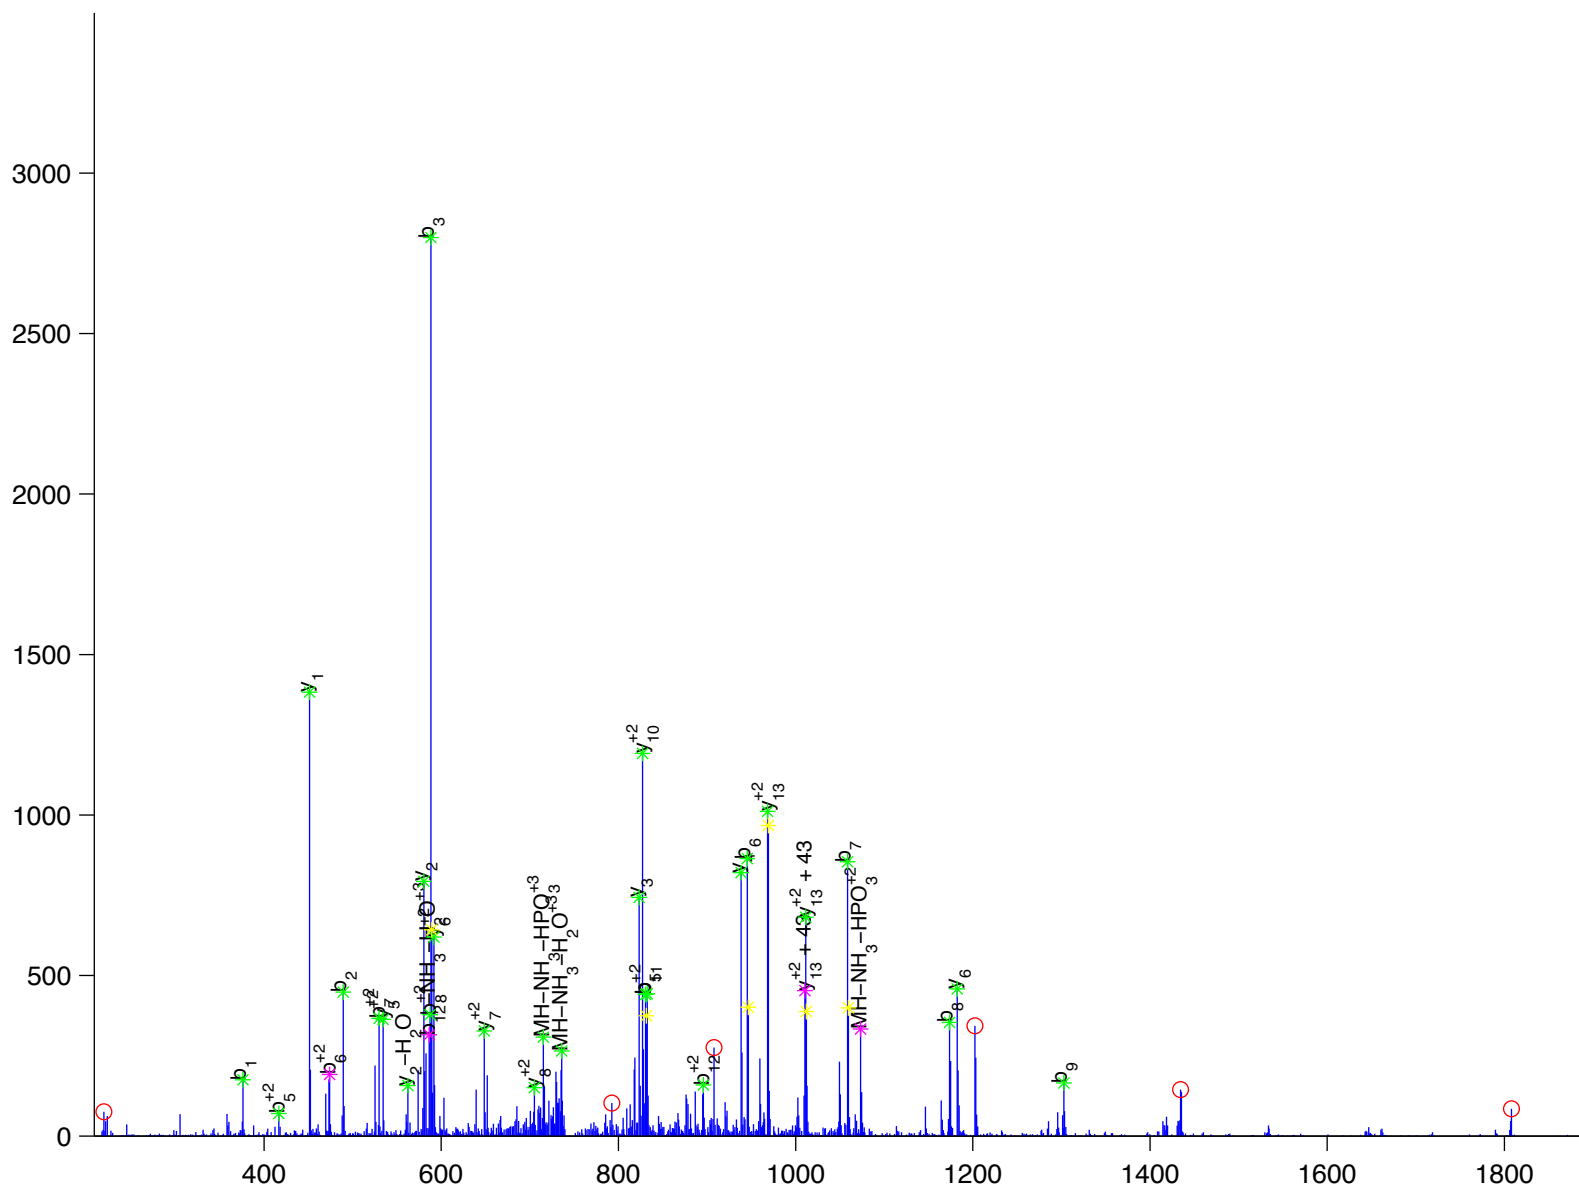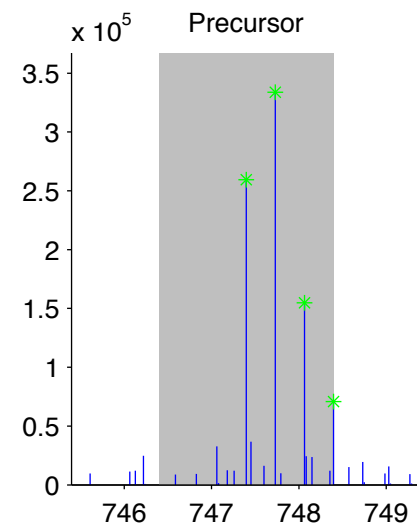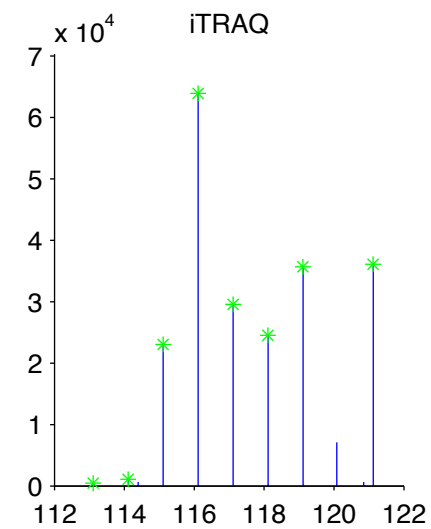

E [ N ] T [ I ] y [ L ] Q [ V ] Q [ T ] G [ K ]

solute carrier family 22 member 1

Charge State: +3

Scan Number: 5100

File Name: 090806ptp1blivers\_M\_NC2.raw

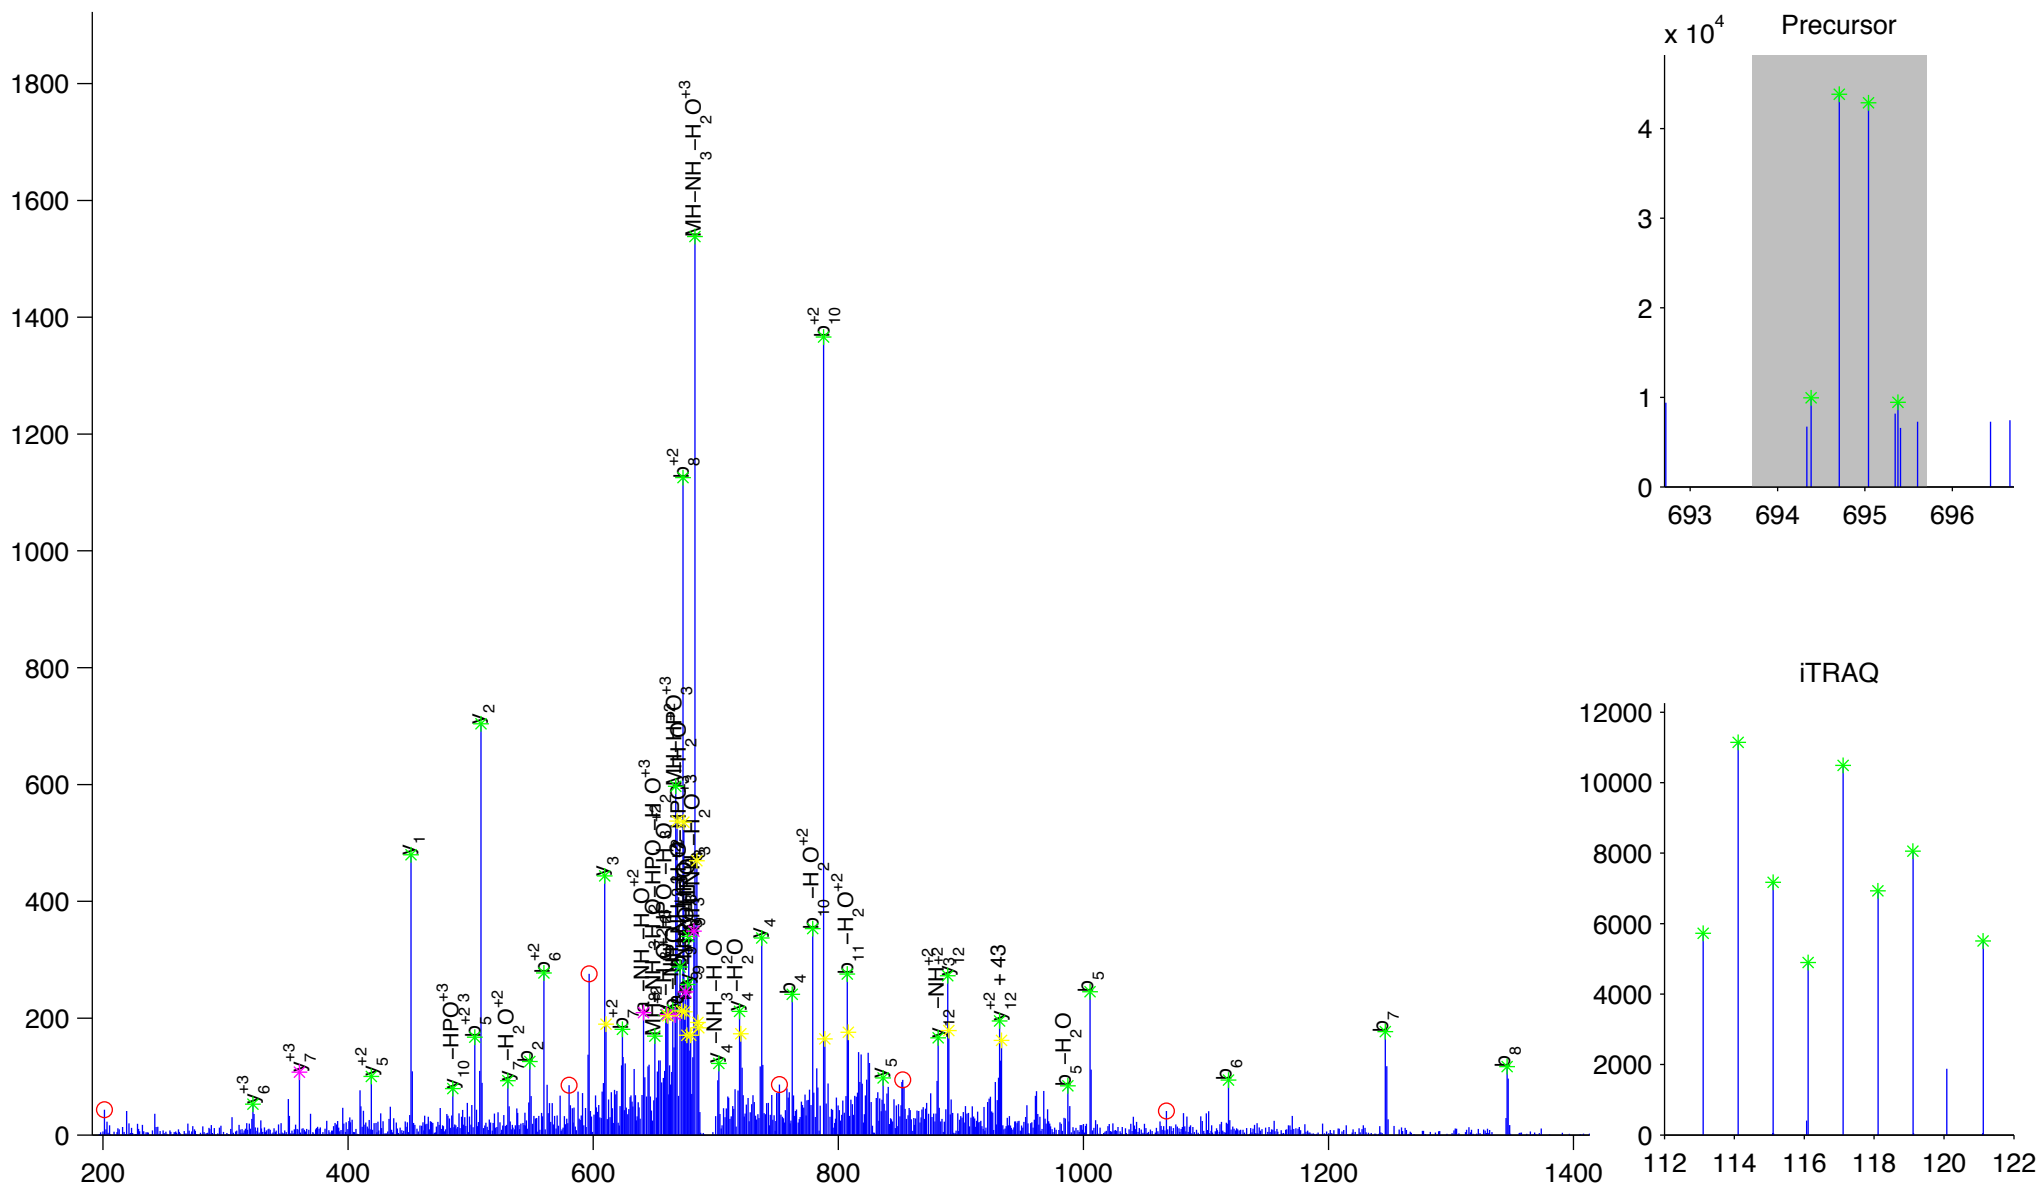

y [ F ] P [ T ] Q [ A ] L [ N ] F [ A ] F [ K ]

solute carrier family 25, member 5  
 Charge State: +3  
 Scan Number: 4465  
 File Name: HJ072909\_HFD\_E1\_2.raw

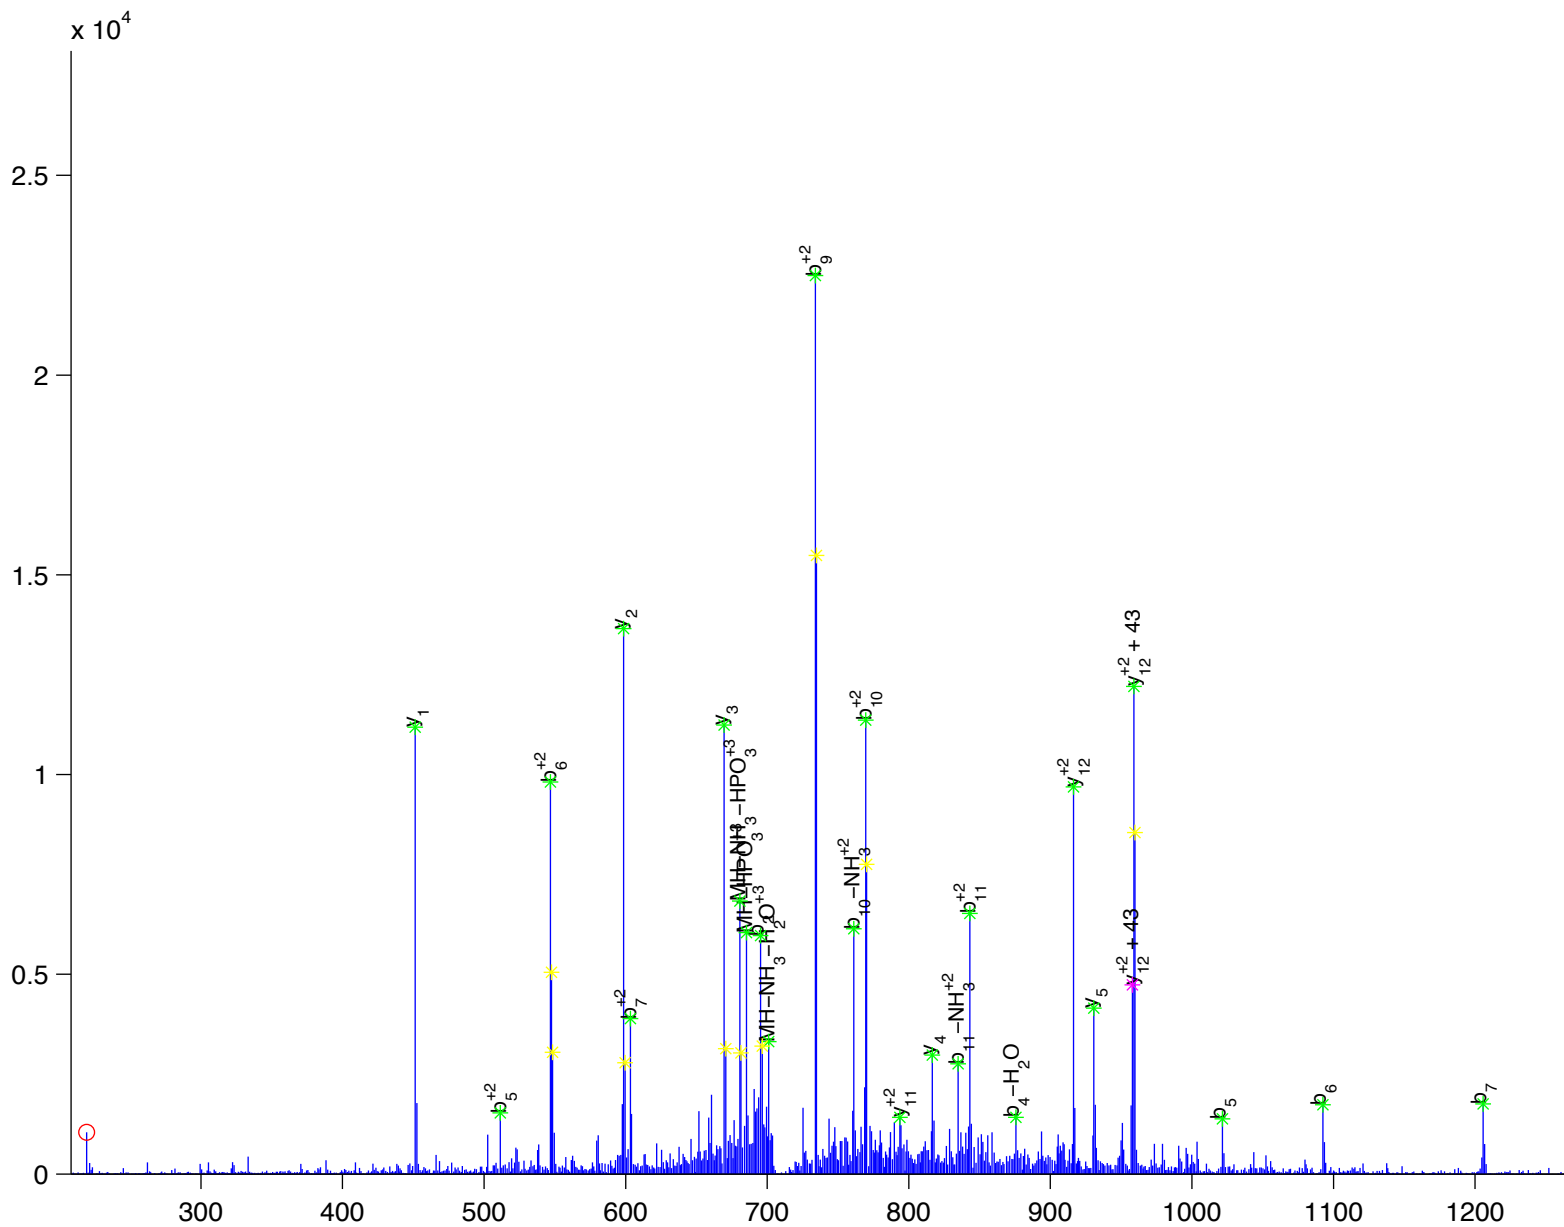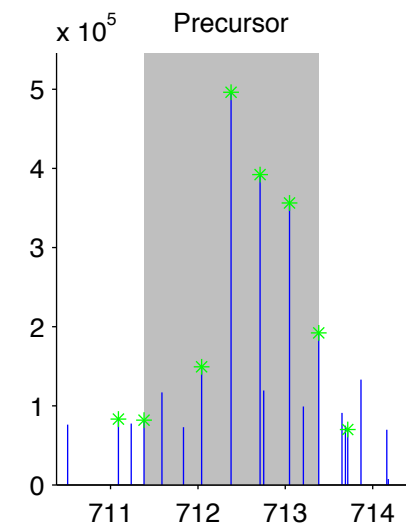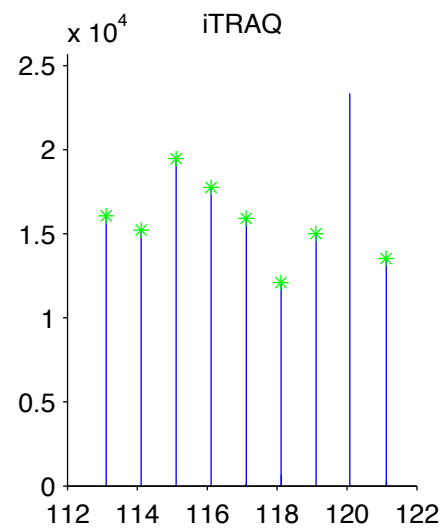

A [ A ] y [ F ] G [ I ] Y [ D ] T [ A ] K

solute carrier family 25, member 5

Charge State: +3

Scan Number: 6575

File Name: 091130ptp1blivers\_hfd\_basal2.raw

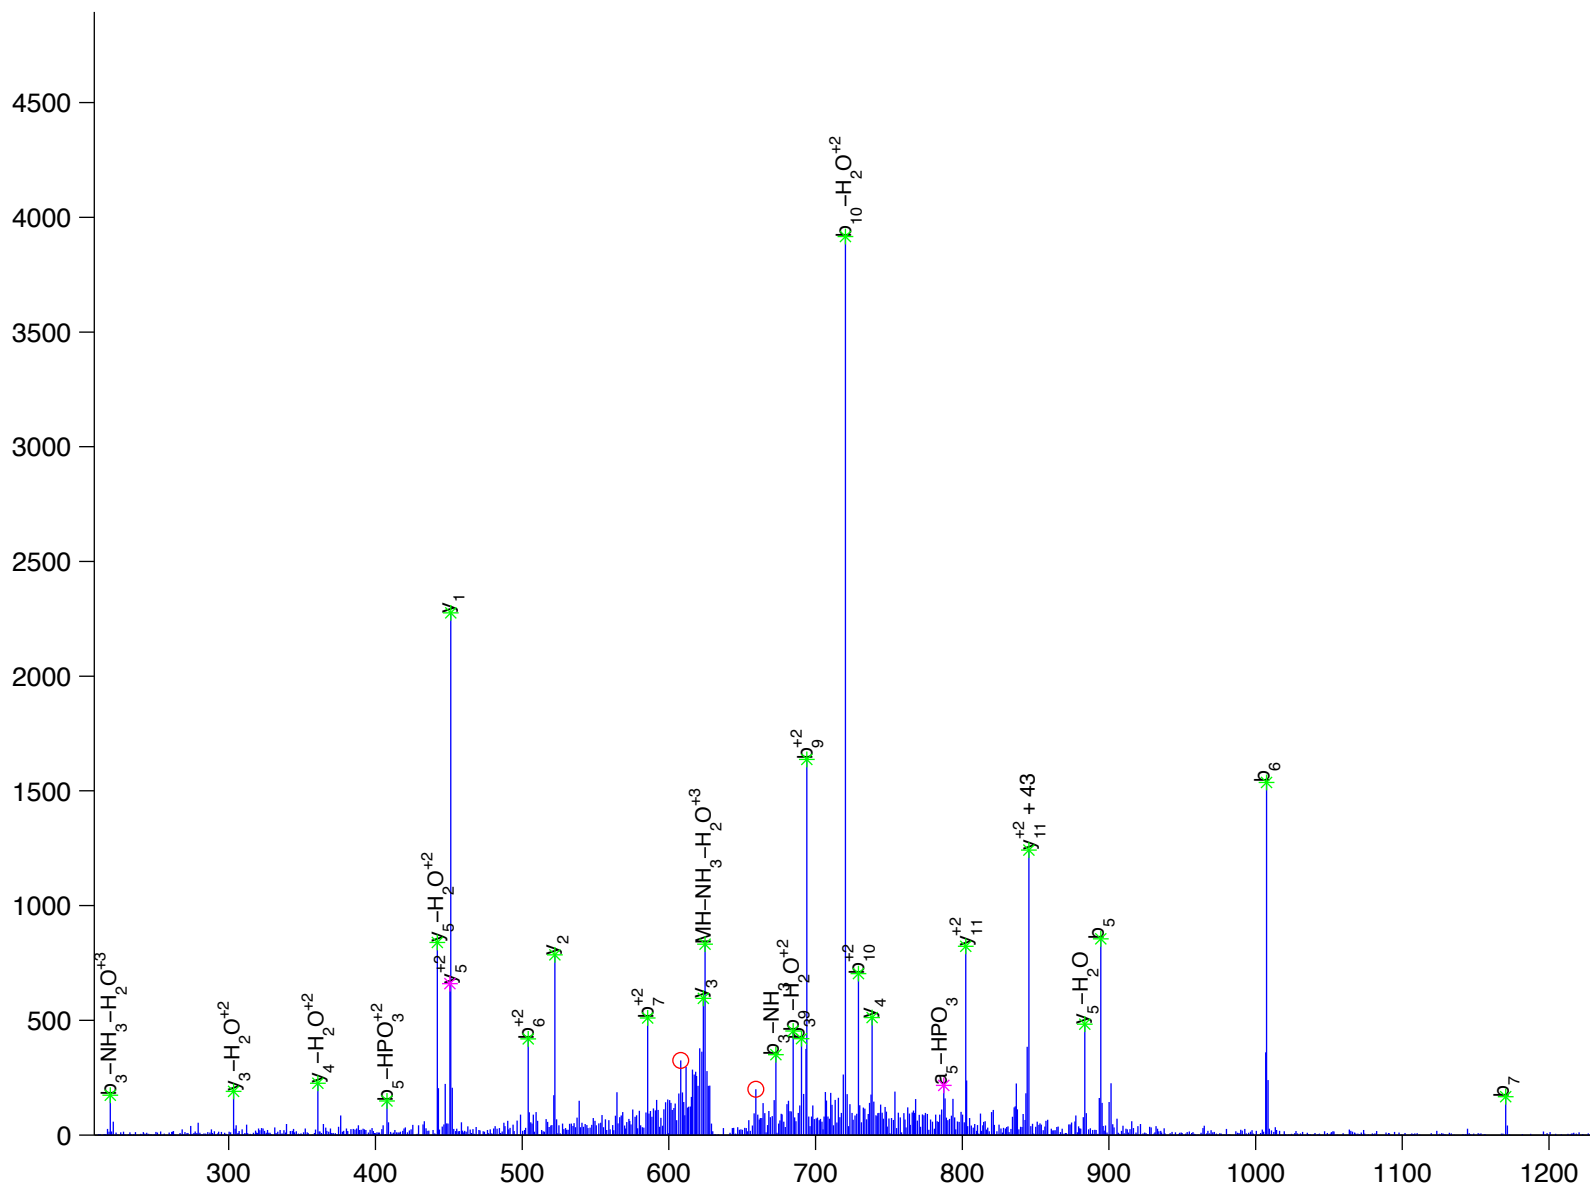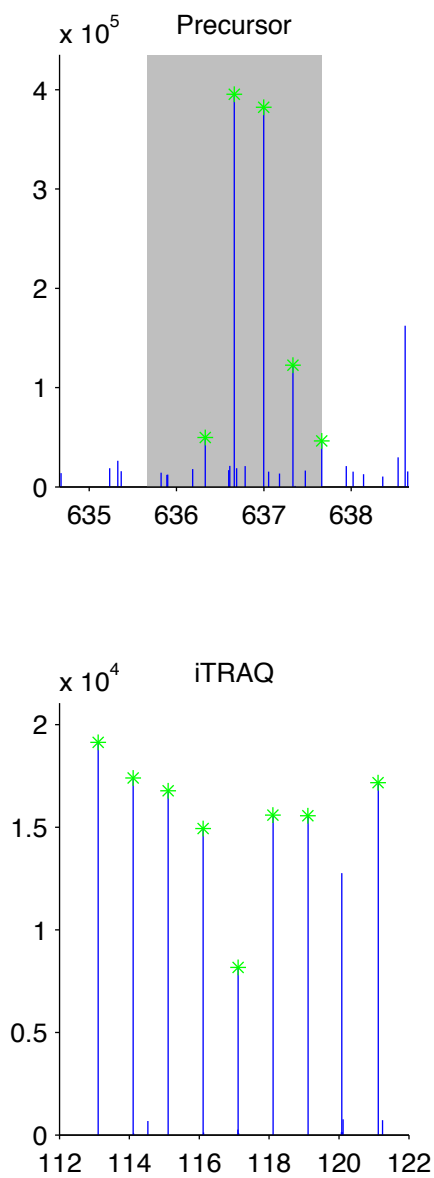



S [ Q ] P [ I ] D [ D ] E [ I ] y [ E ] E [ L ] P [ E ] E [ E ] E [ D ] T [ A ] S [ V ] K

src family associated phosphoprotein 2

Charge State: +3

Scan Number: 6887

File Name: 091130ptp1blivers\_hfd\_basal2.raw

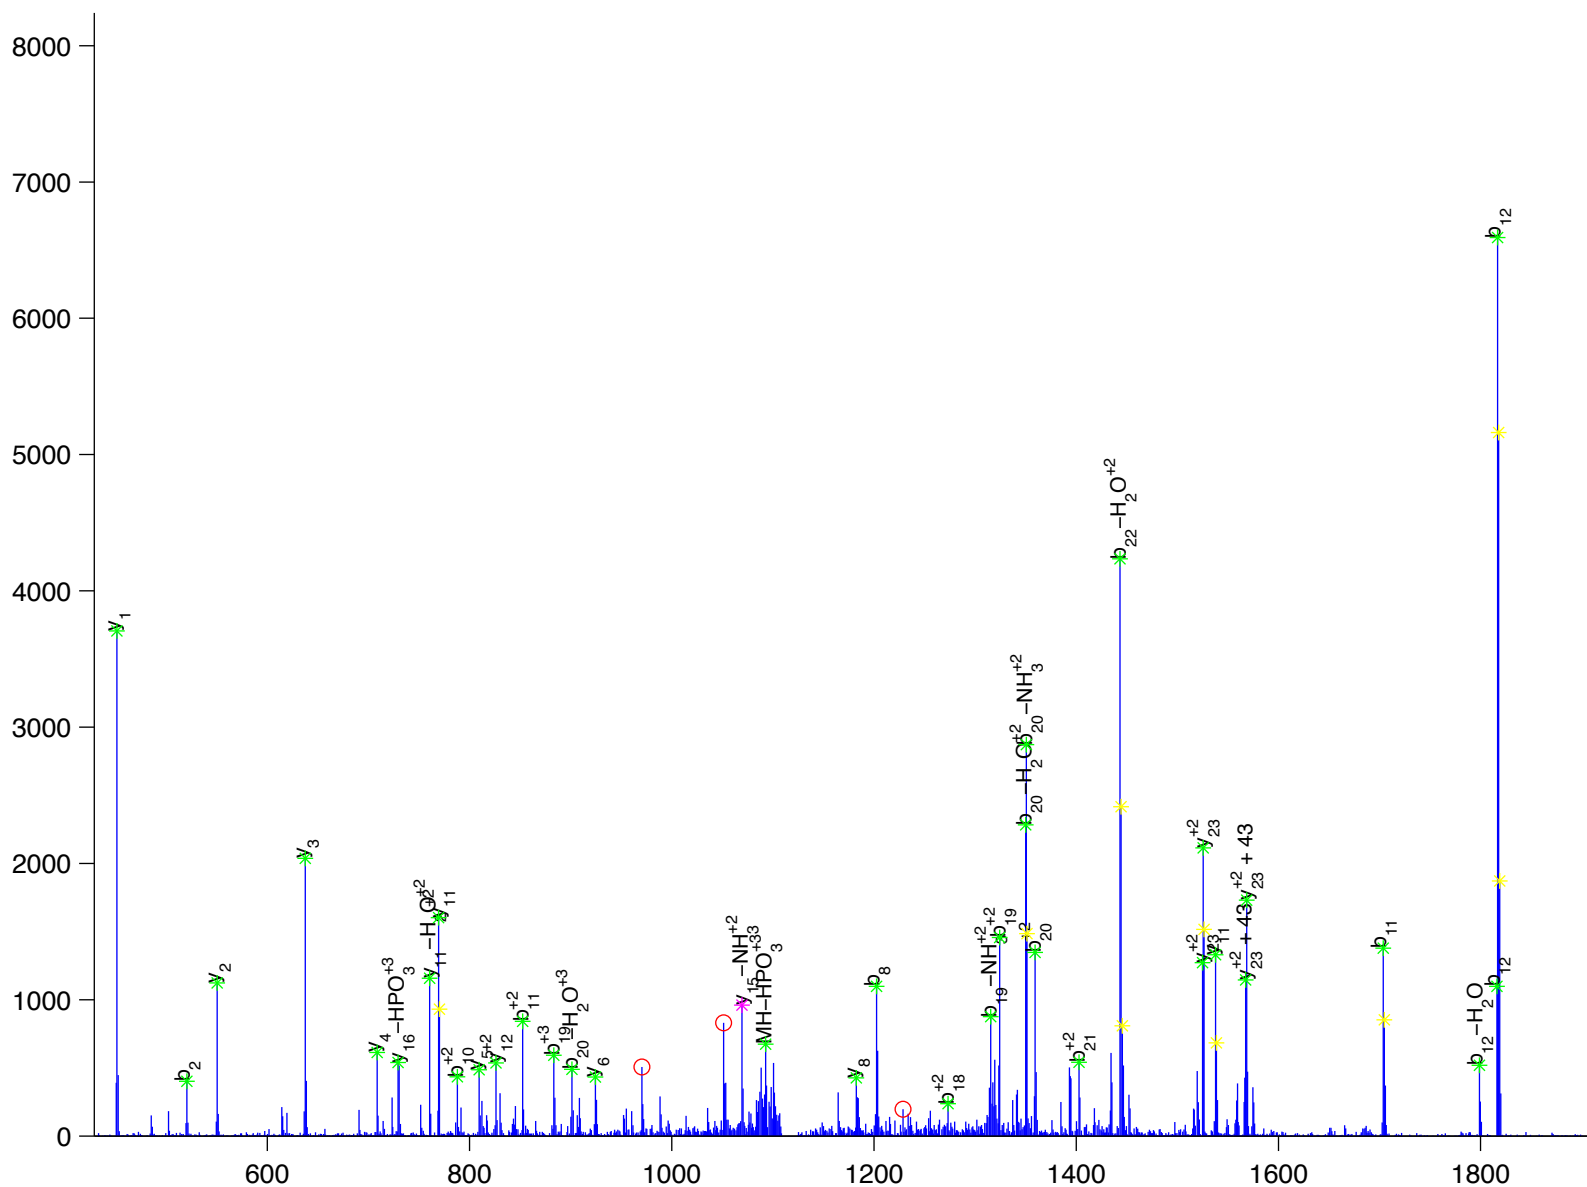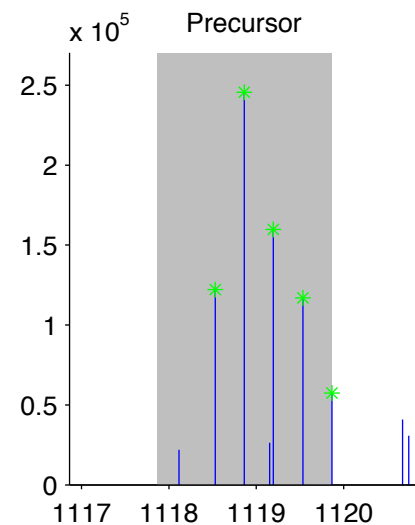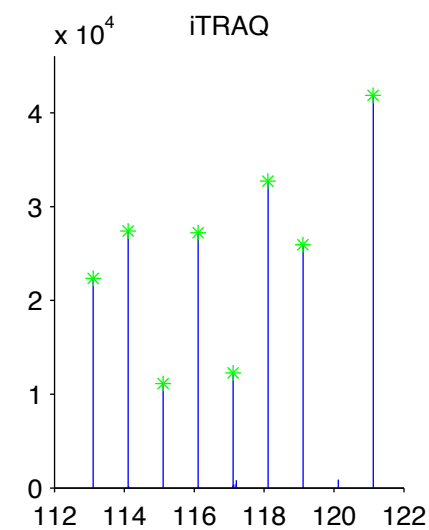

L [ P ] E [ D ] D [ E ] R [ P ] P [ E ] E [ y ] D [ Q ] P [ W ] E [ W ] K

Src homology 2 domain containing F

Charge State: +3

Scan Number: 5488

File Name: 090728ptp1blivers\_M\_NC\_ins\_e.raw

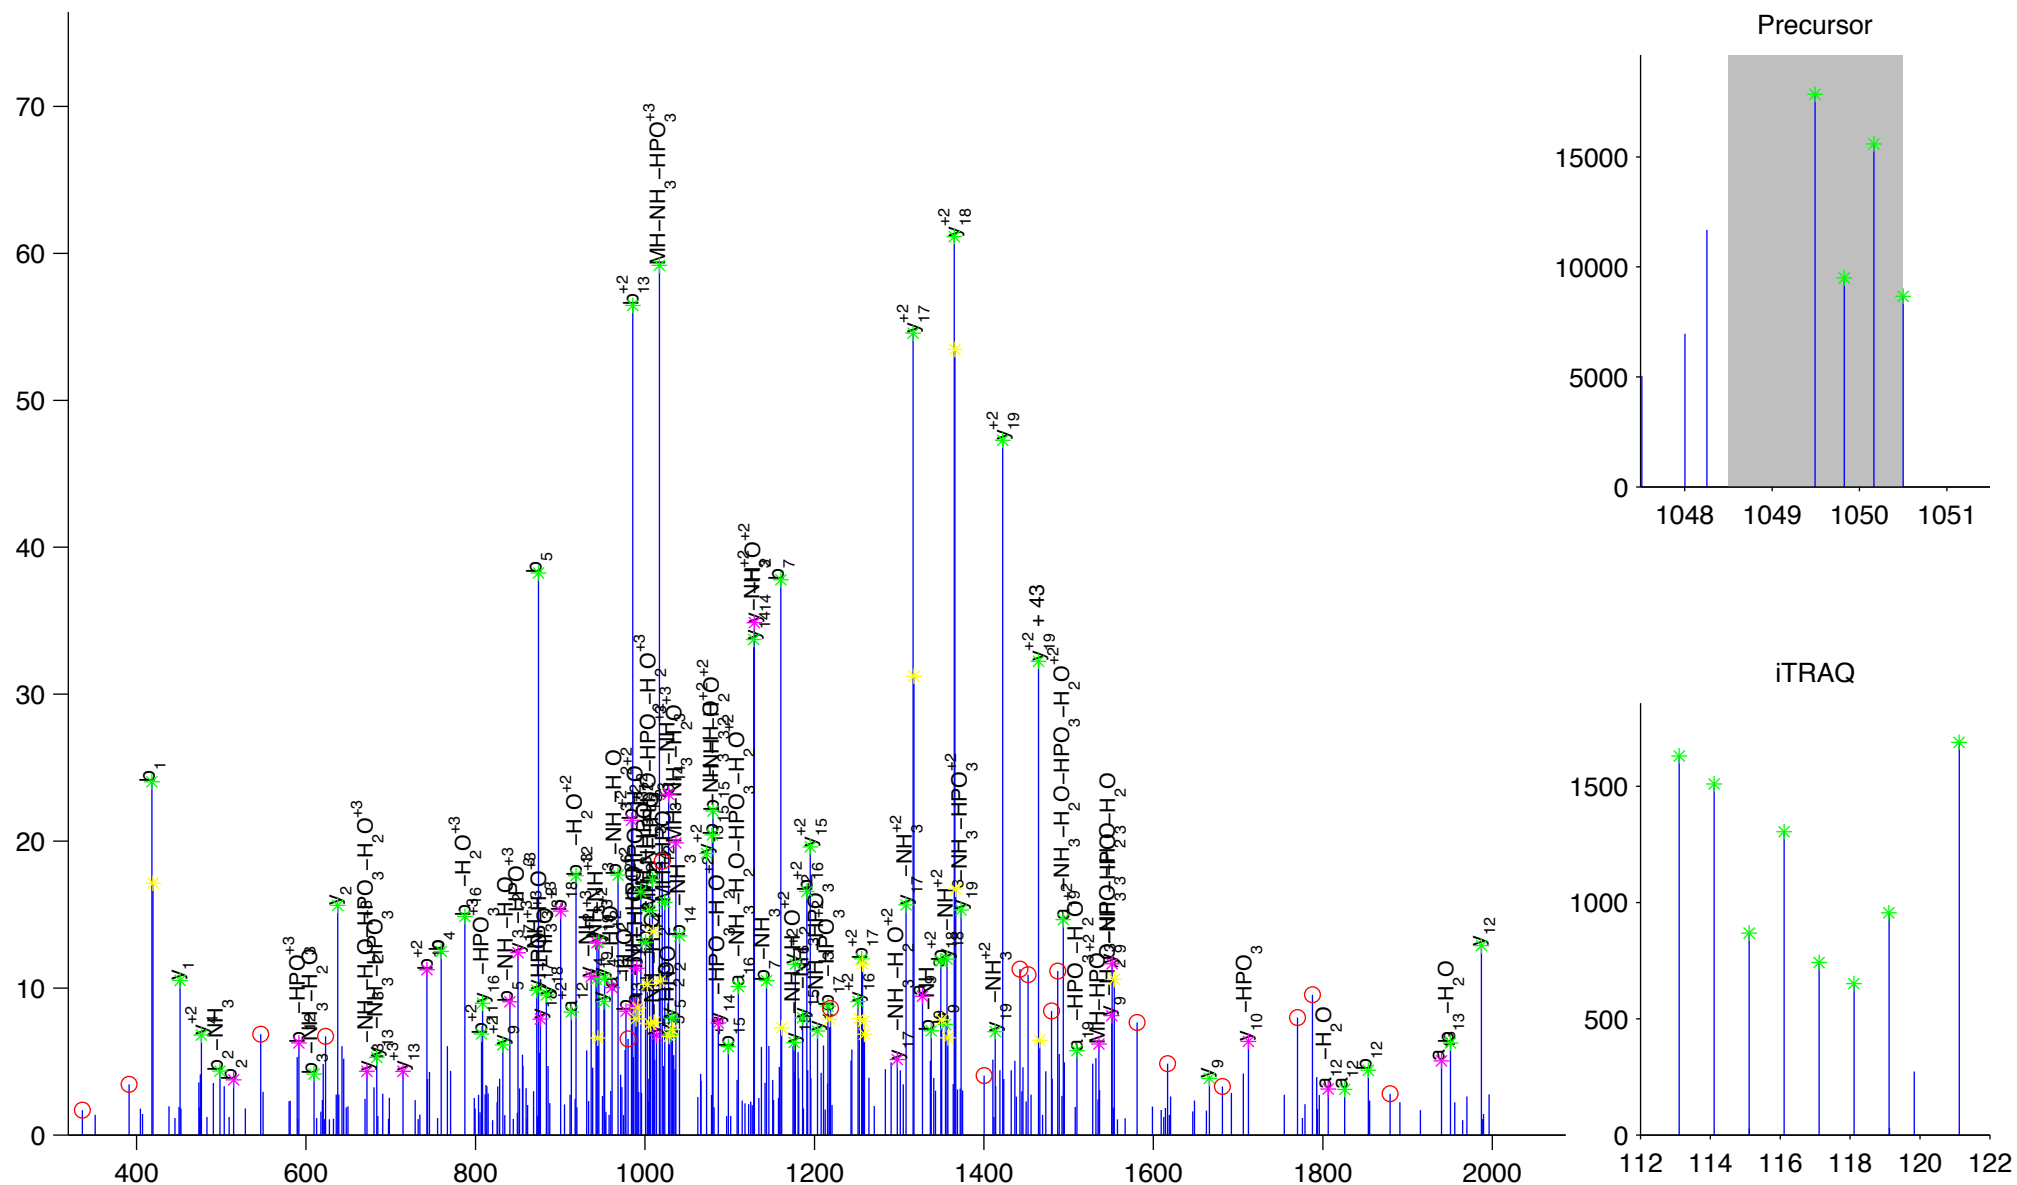

G[E]S[A]G[y]M[E]P[Y]E[A]Q]R

src homology 2 domain-containing transforming protein B

Charge State: +3

Scan Number: 3113

File Name: 100827ptp1blivers\_ncHFD\_basal.raw

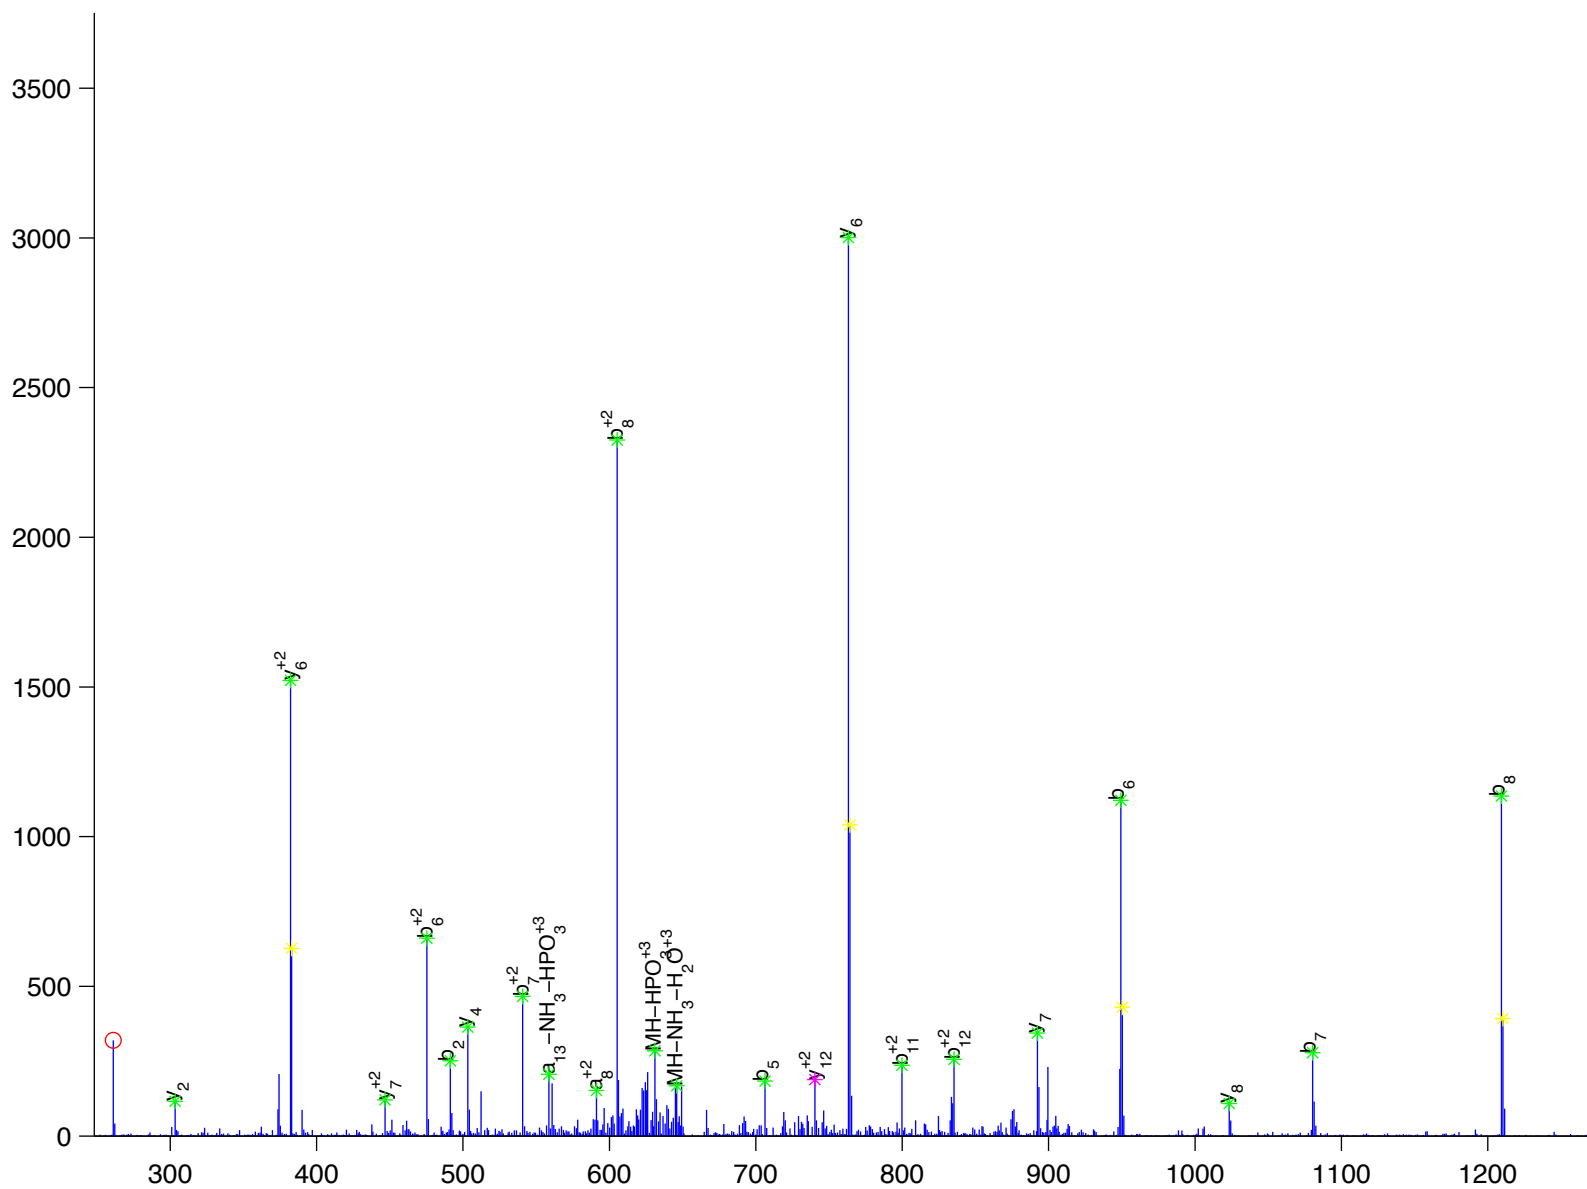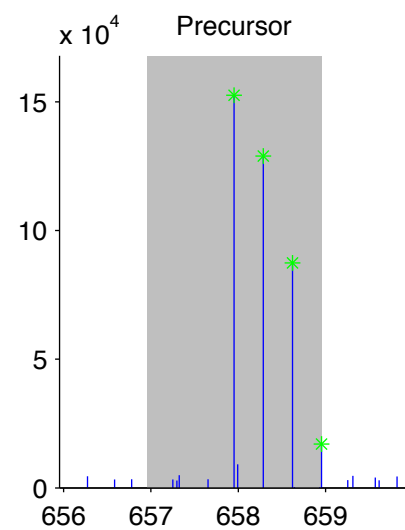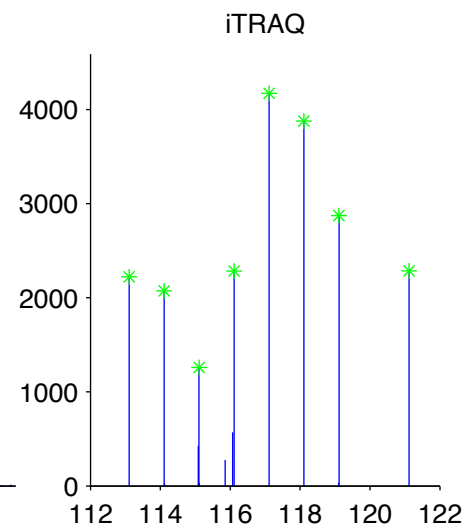

L [ P ] Q [ D ] D [ D ] R [ P ] A [ D ] E [ y ] D [ Q ] P [ W ] E [ W ] N [ R ]

src homology 2 domain-containing transforming protein B

Charge State: +3

Scan Number: 6491

File Name: 091130ptp1blivers\_hfd\_basal2.raw

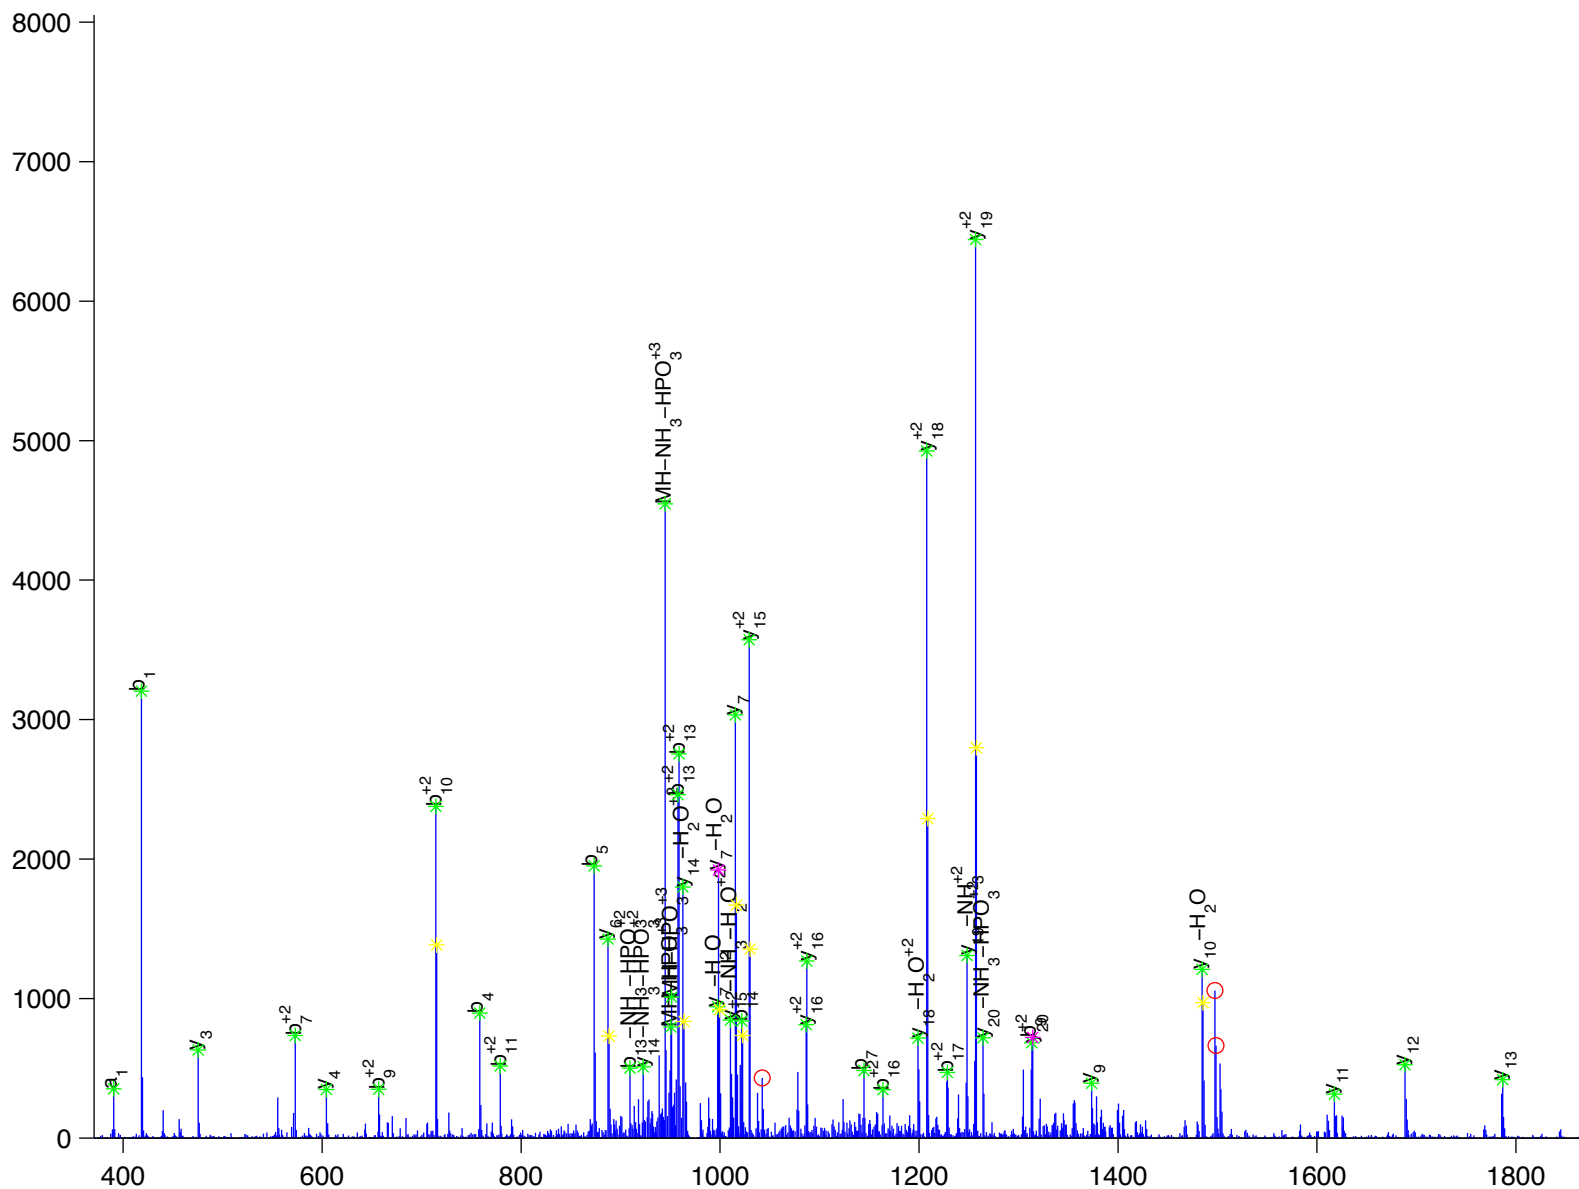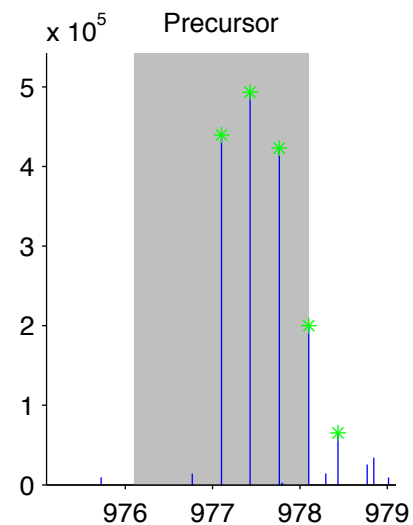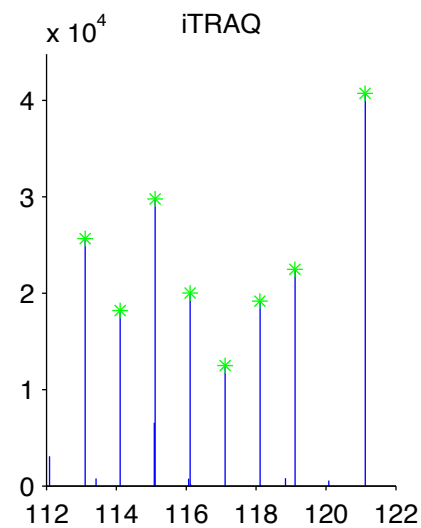

V [ T ] I [ A ] D [ D ] y [ S ] D [ P ] F [ D ] A [ K ]

src homology 2 domain-containing transforming protein B

Charge State: +3

Scan Number: 8852

File Name: 090807ptp1blivers\_M\_HFD\_basal.raw

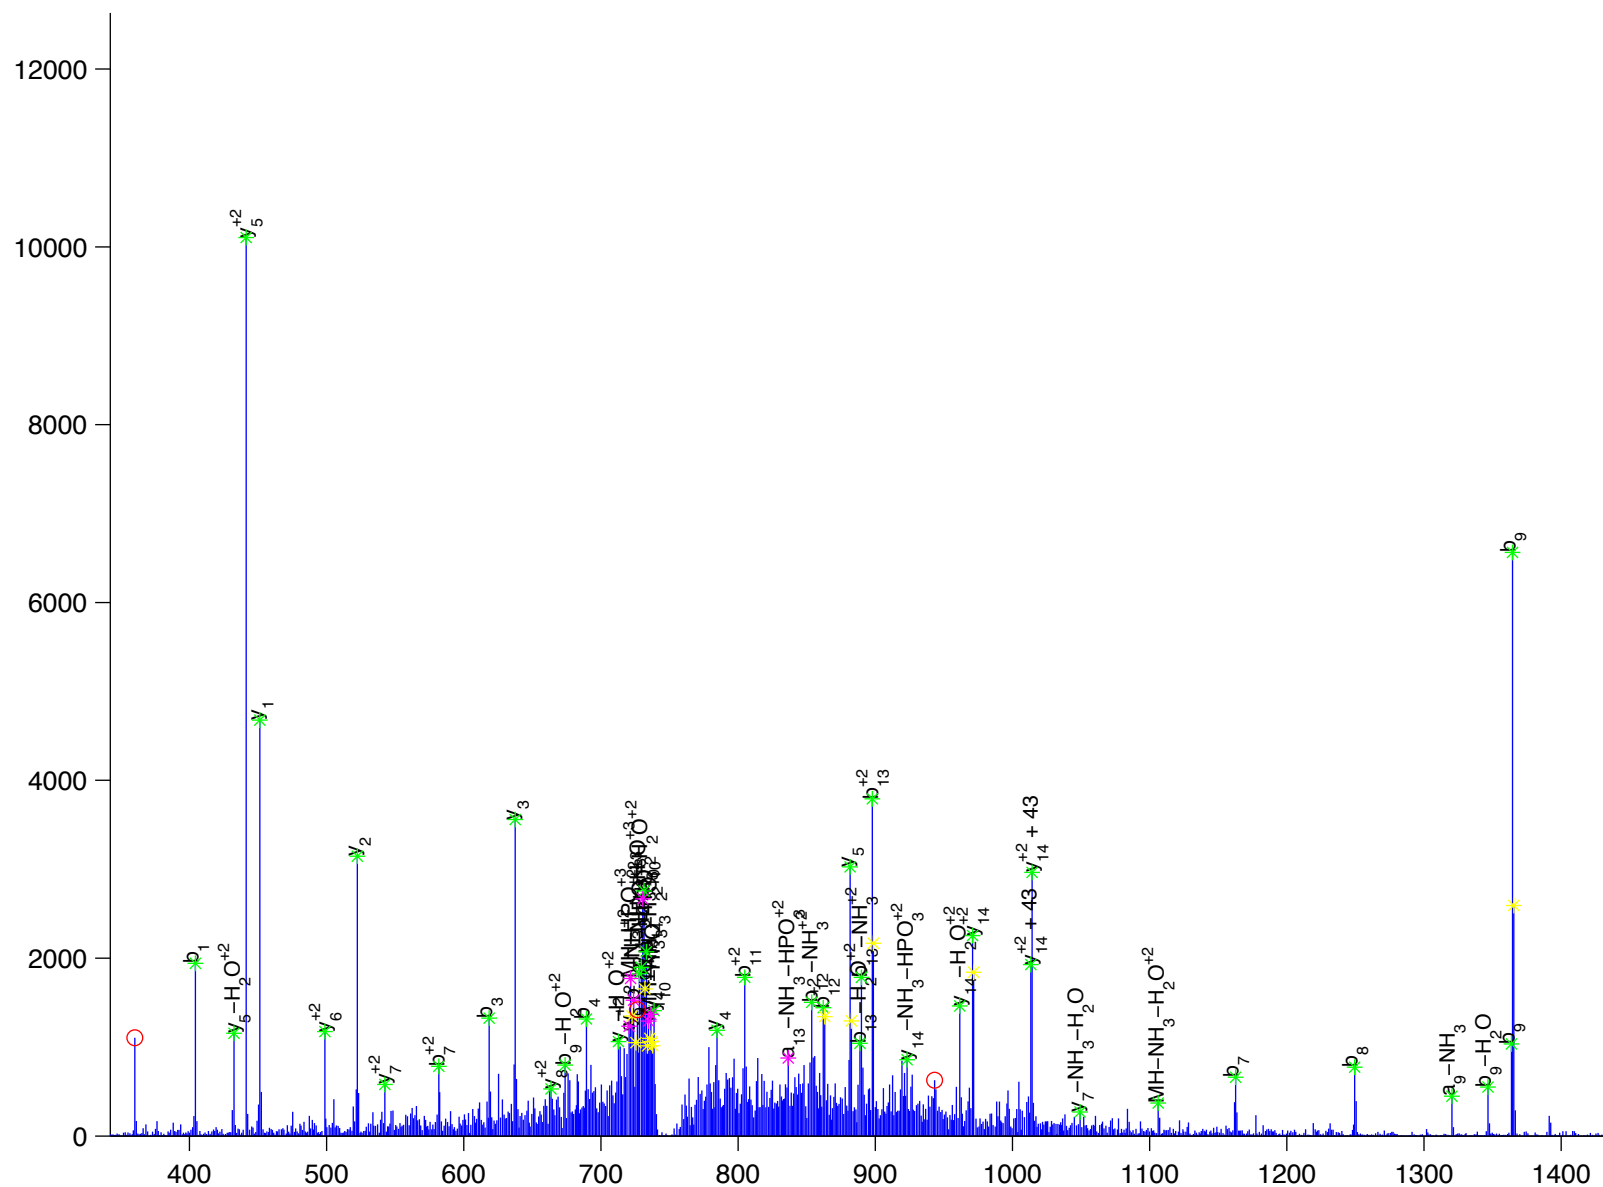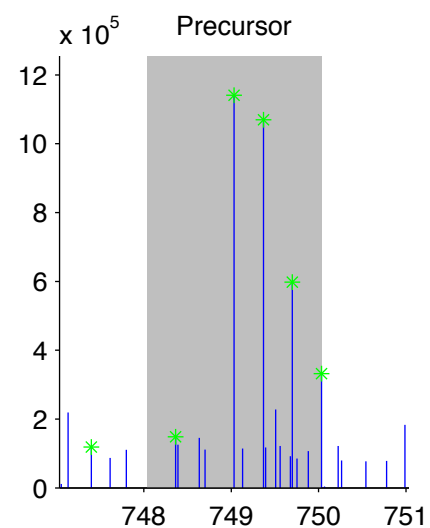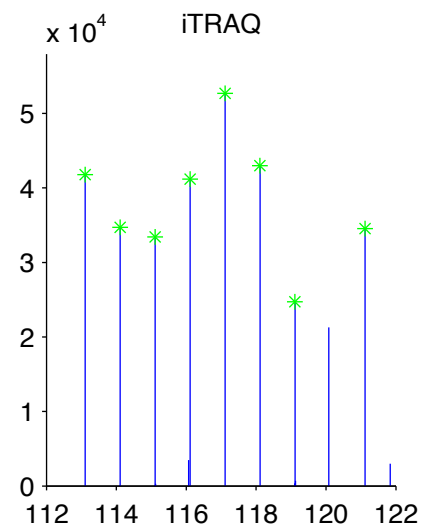

E L F D D P S y V N I Q N L D K

src homology 2 domain-containing transforming protein C

Charge State: +4

Scan Number: 5946

File Name: 100905ptp1blivers\_ncHFD\_basal.raw

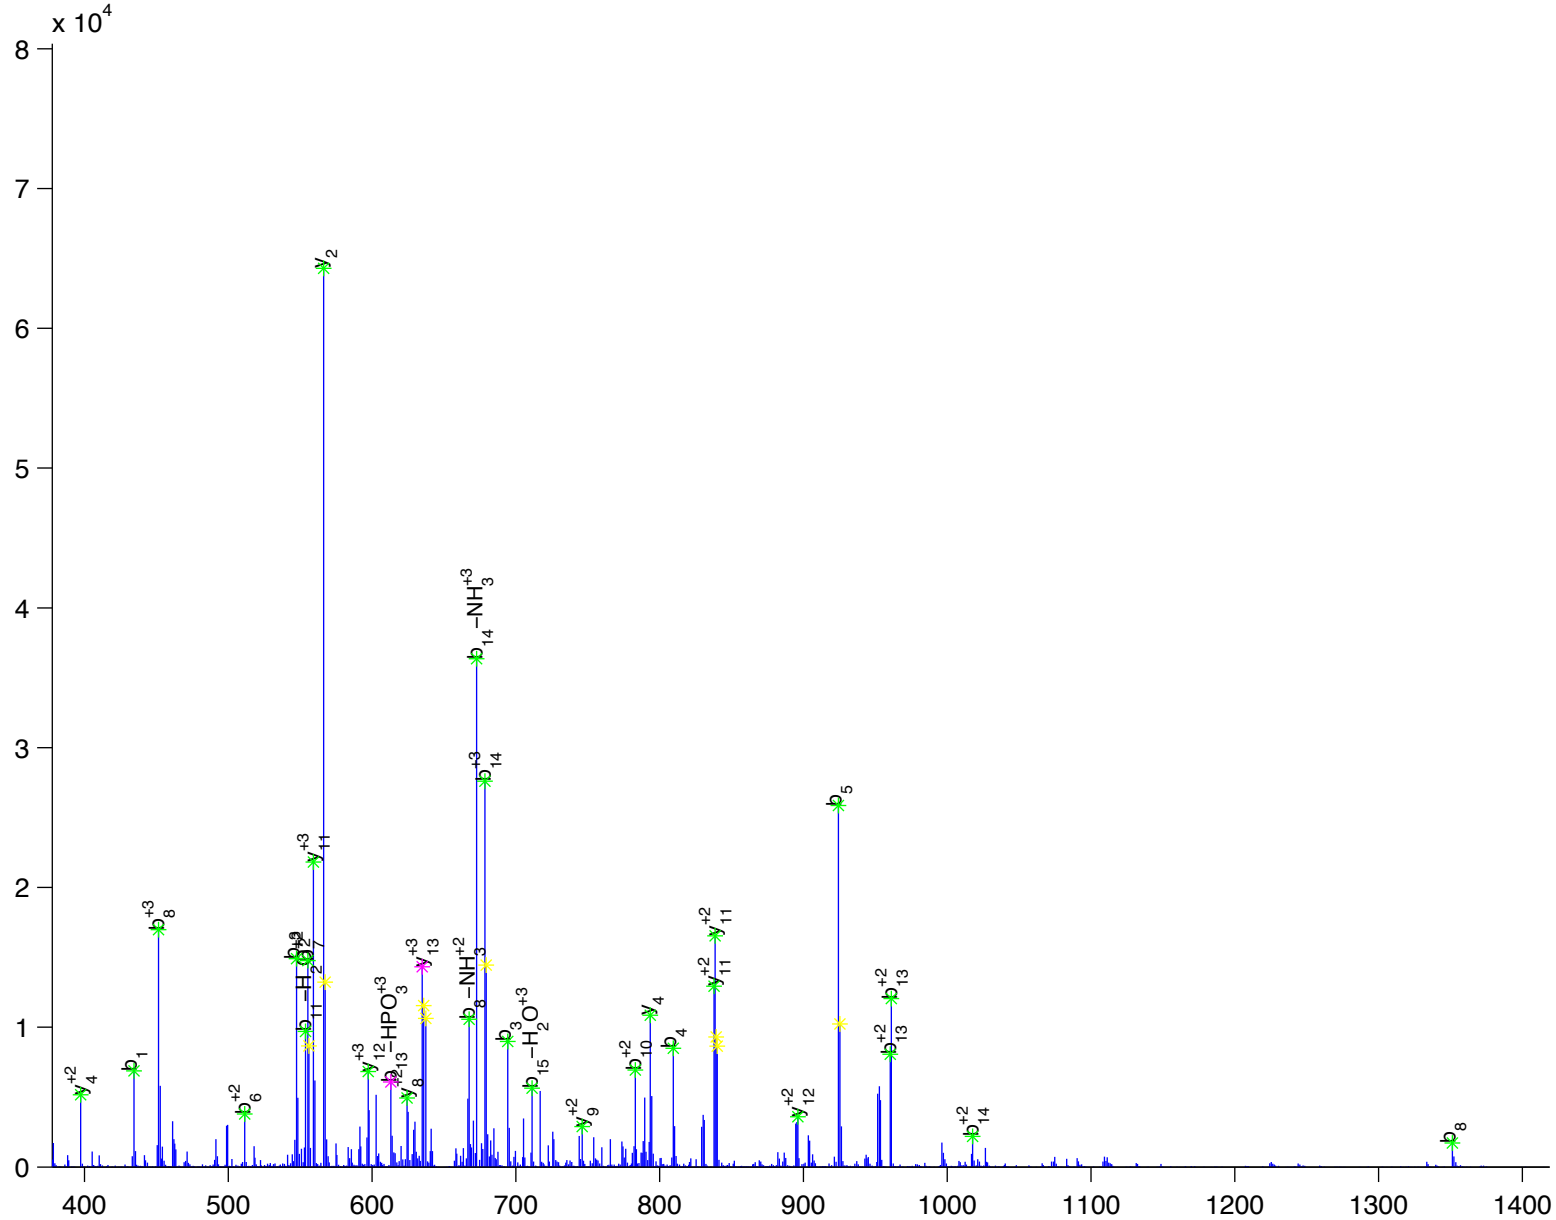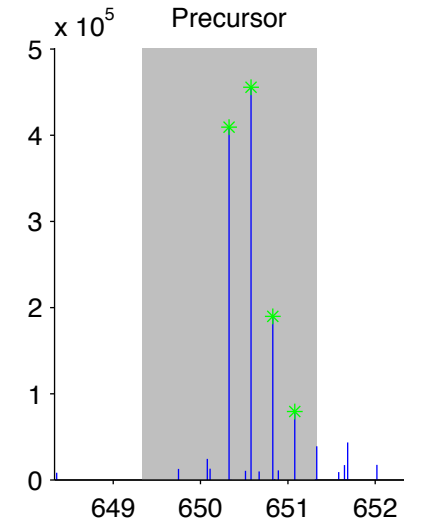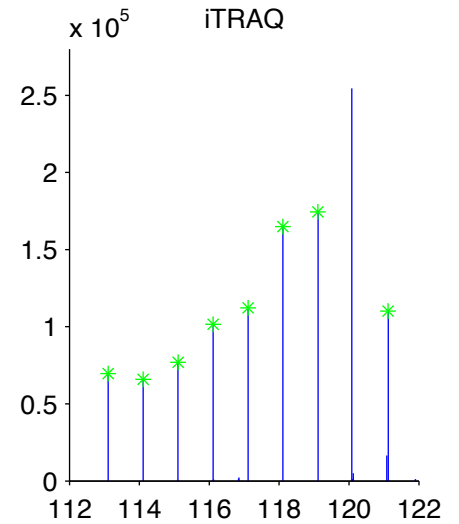

A [D] [D] [A] [D] [E] [F] [G] [y] [S] [R]

staphylococcal nuclease domain containing 1  
 Charge State: +2  
 Scan Number: 4506  
 File Name: 091130ptp1blivers\_hfd\_basal2.raw

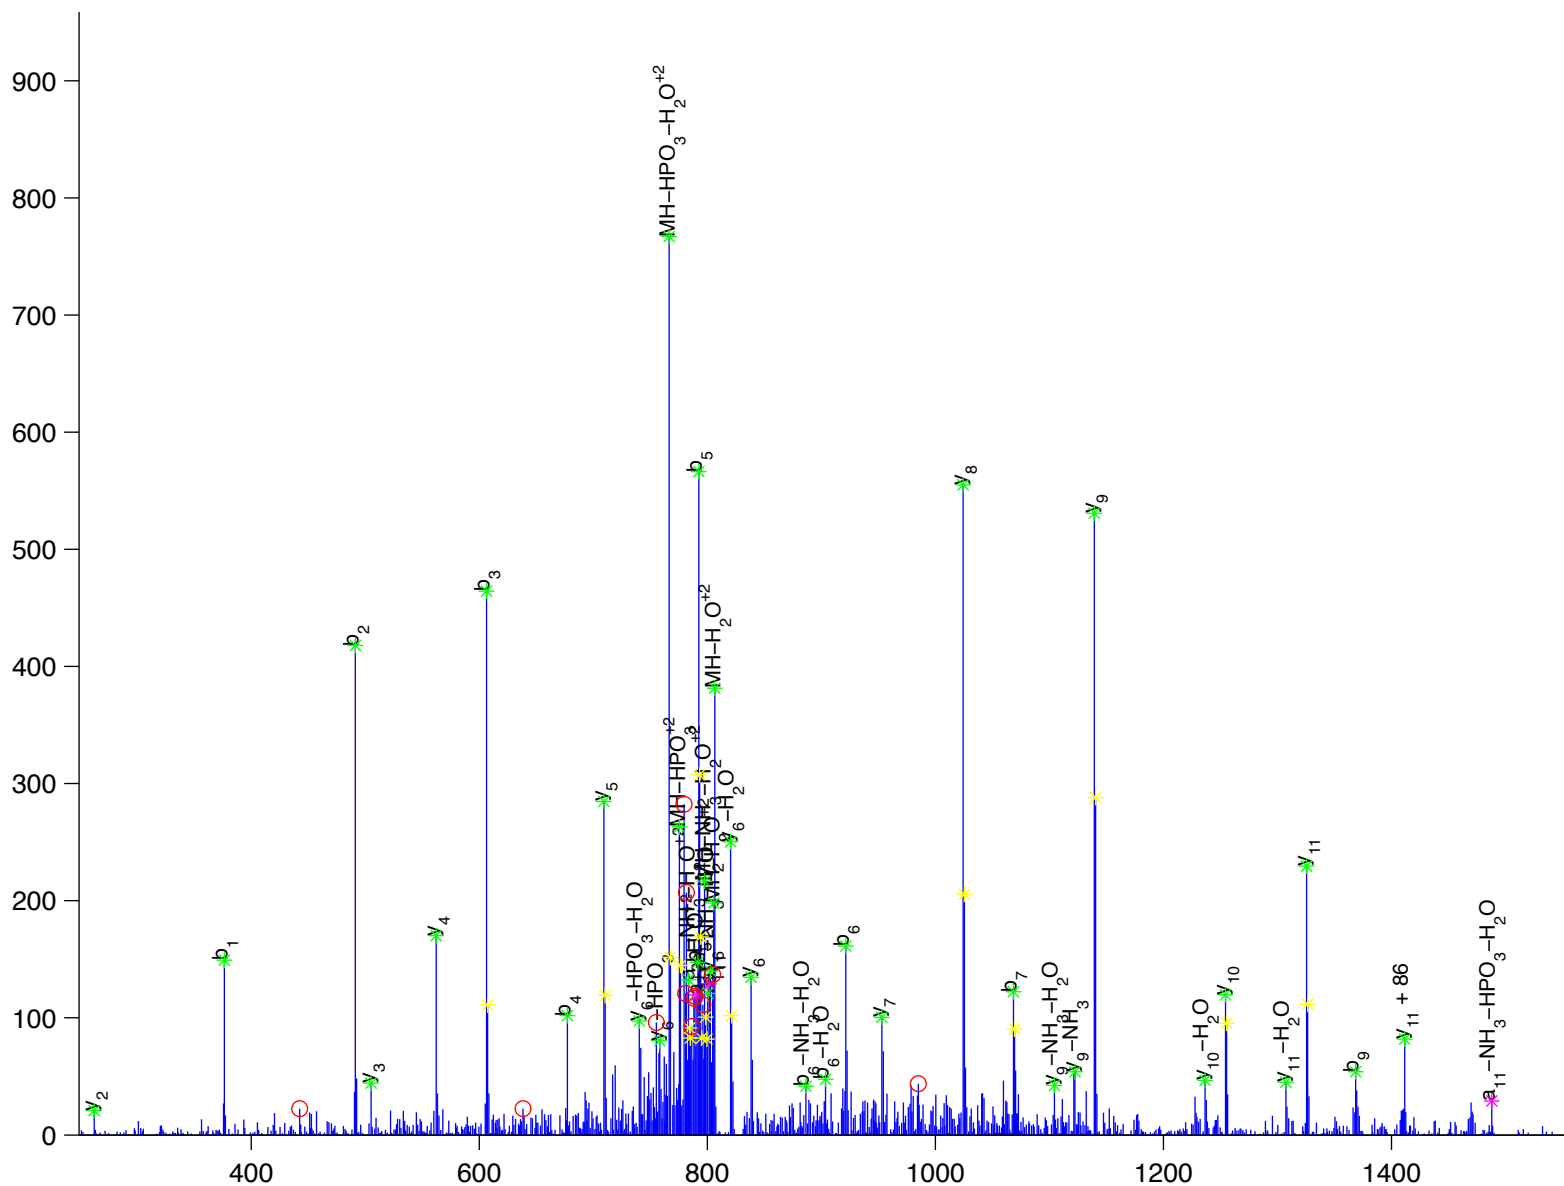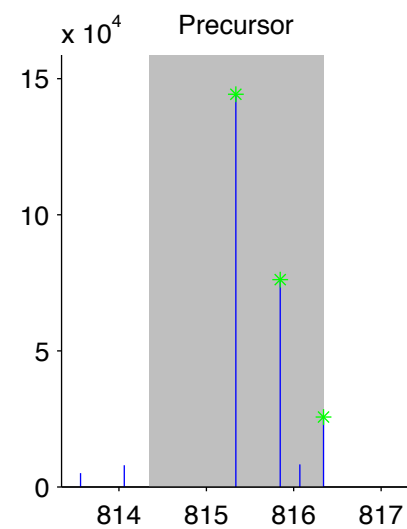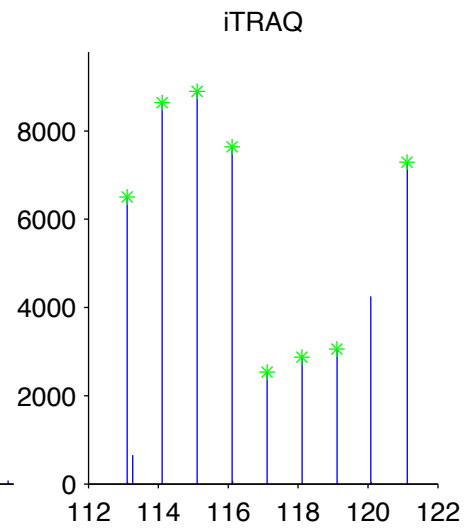

E [ y ] [ G ] [ M ] [ I ] [ Y ] [ L ] [ G ] K

staphylococcal nuclease domain containing 1

Charge State: +3

Scan Number: 7338

File Name: 090806ptp1blivers\_M\_NC2.raw

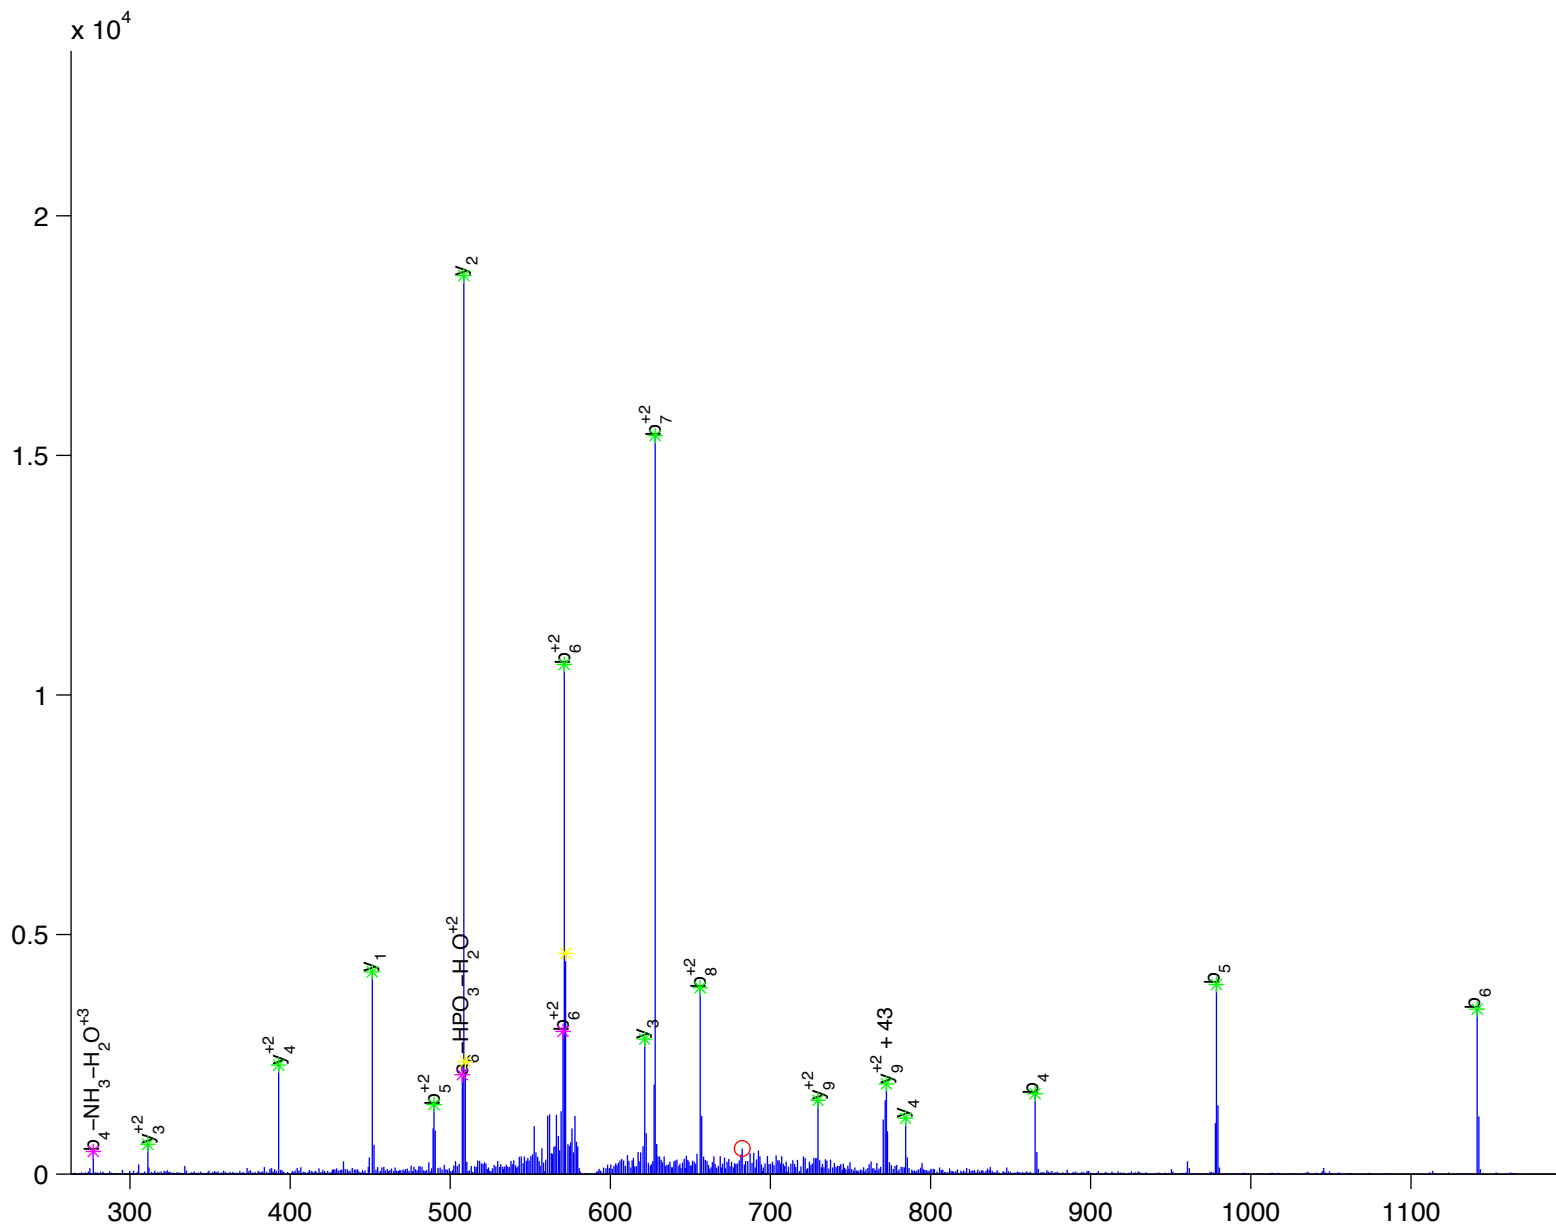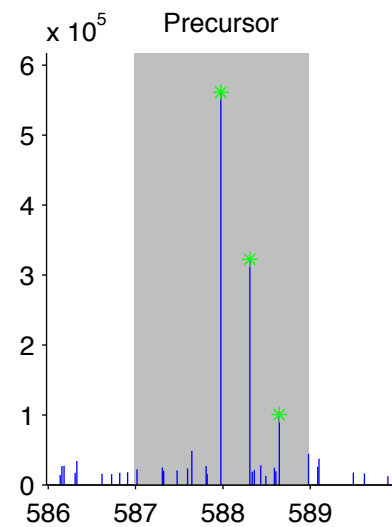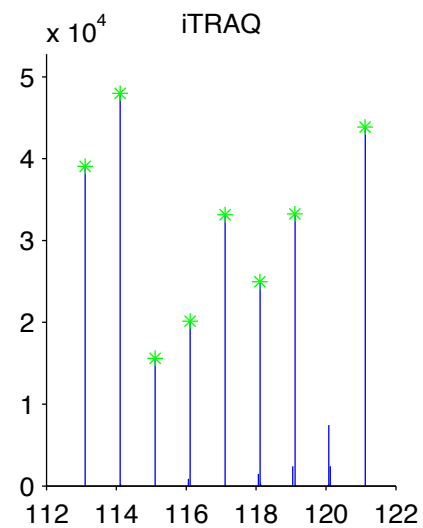



H[S]V[N]N[T]y[S]Q[F]Q[D]E[Y]S[L]E[E]V[M]K

sterol carrier protein 2, liver

Charge State: +4

Scan Number: 8399

File Name: 090807ptp1blivers\_M\_HFD\_basal.raw

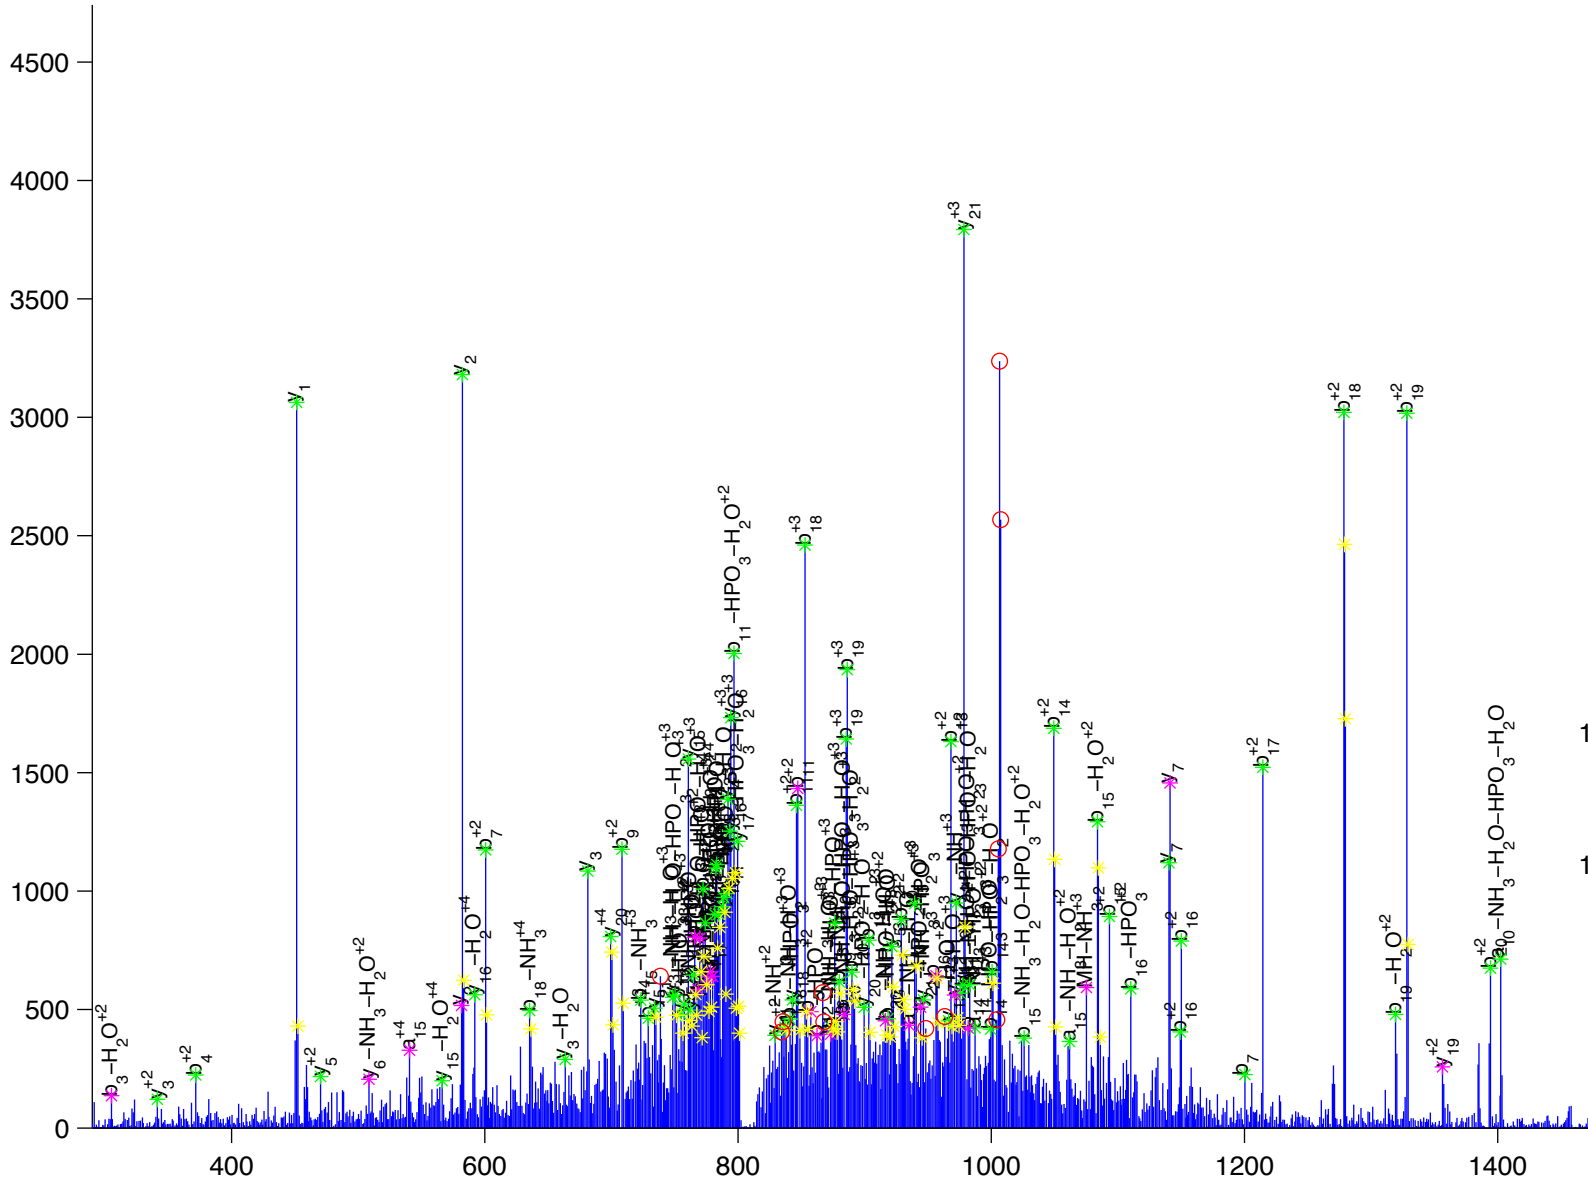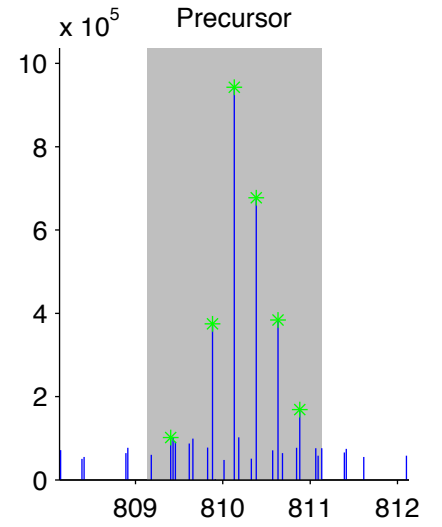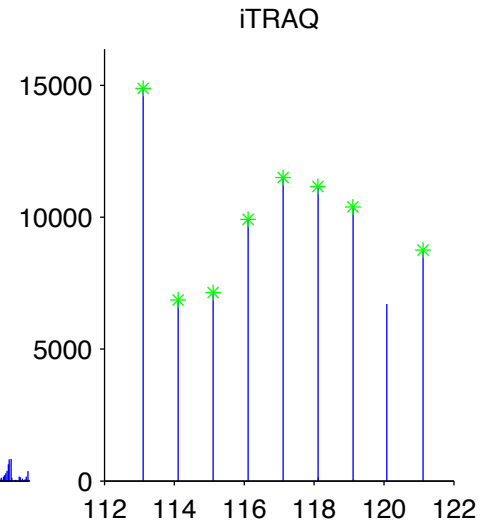

V [ P ] I [ V ] I [ N ] P [ N ] A [ y ] D [ N ] L [ A ] I [ Y ] K

Sugen kinase 269 / hypothetical protein LOC244895

Charge State: +4

Scan Number: 3788

File Name: HJ072909\_HFD\_E1\_2.raw

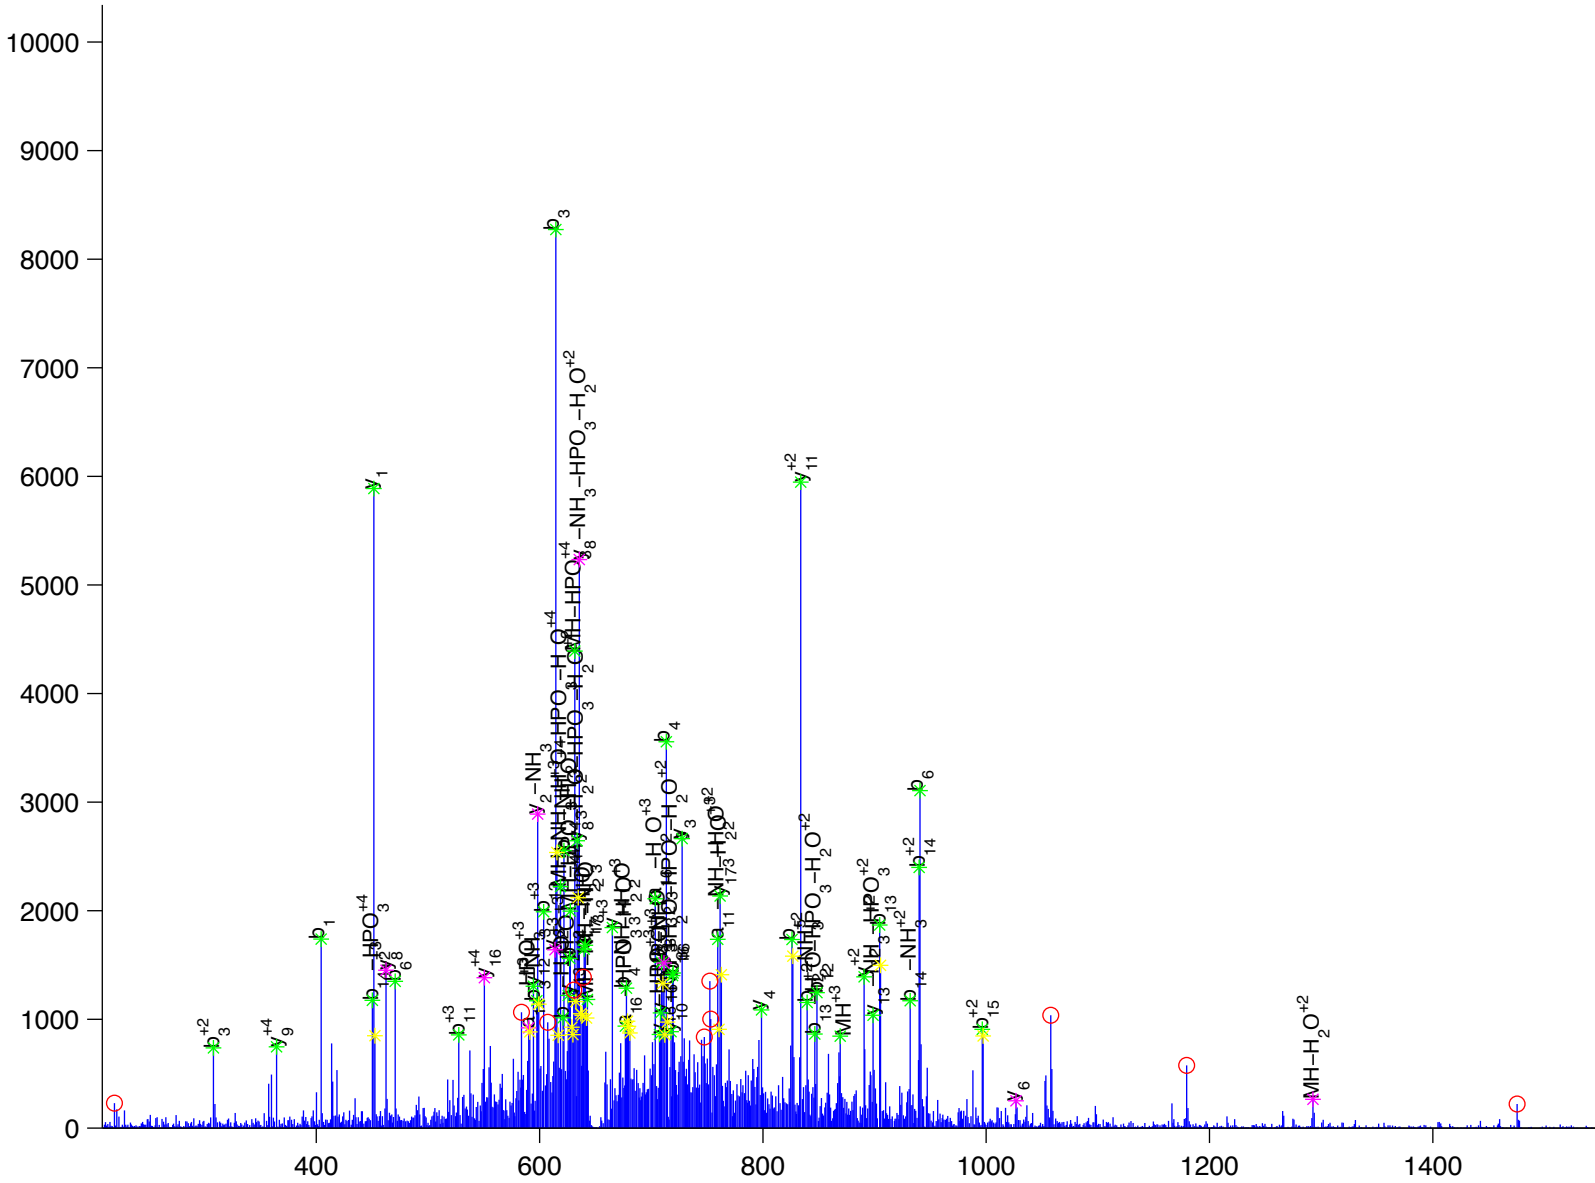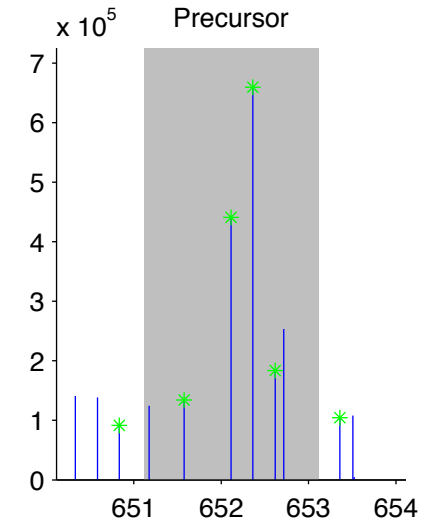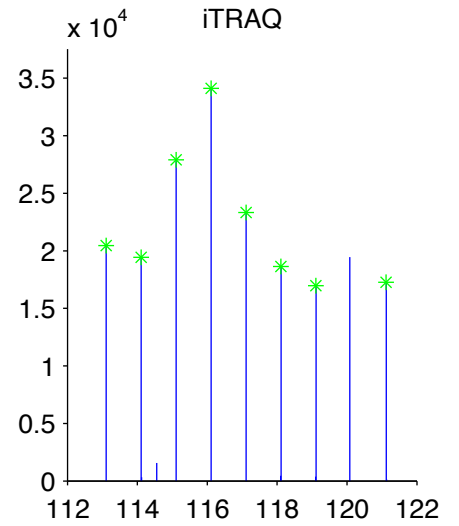

E<sup>1</sup>N<sup>1</sup>P<sup>1</sup>y<sup>1</sup>E<sup>1</sup>D<sup>1</sup>V<sup>1</sup>D<sup>1</sup>L<sup>1</sup>K

suppression of tumorigenicity 5 isoform 1

Charge State: +3

Scan Number: 4811

File Name: 091130ptp1blivers\_hfd\_basal2.raw

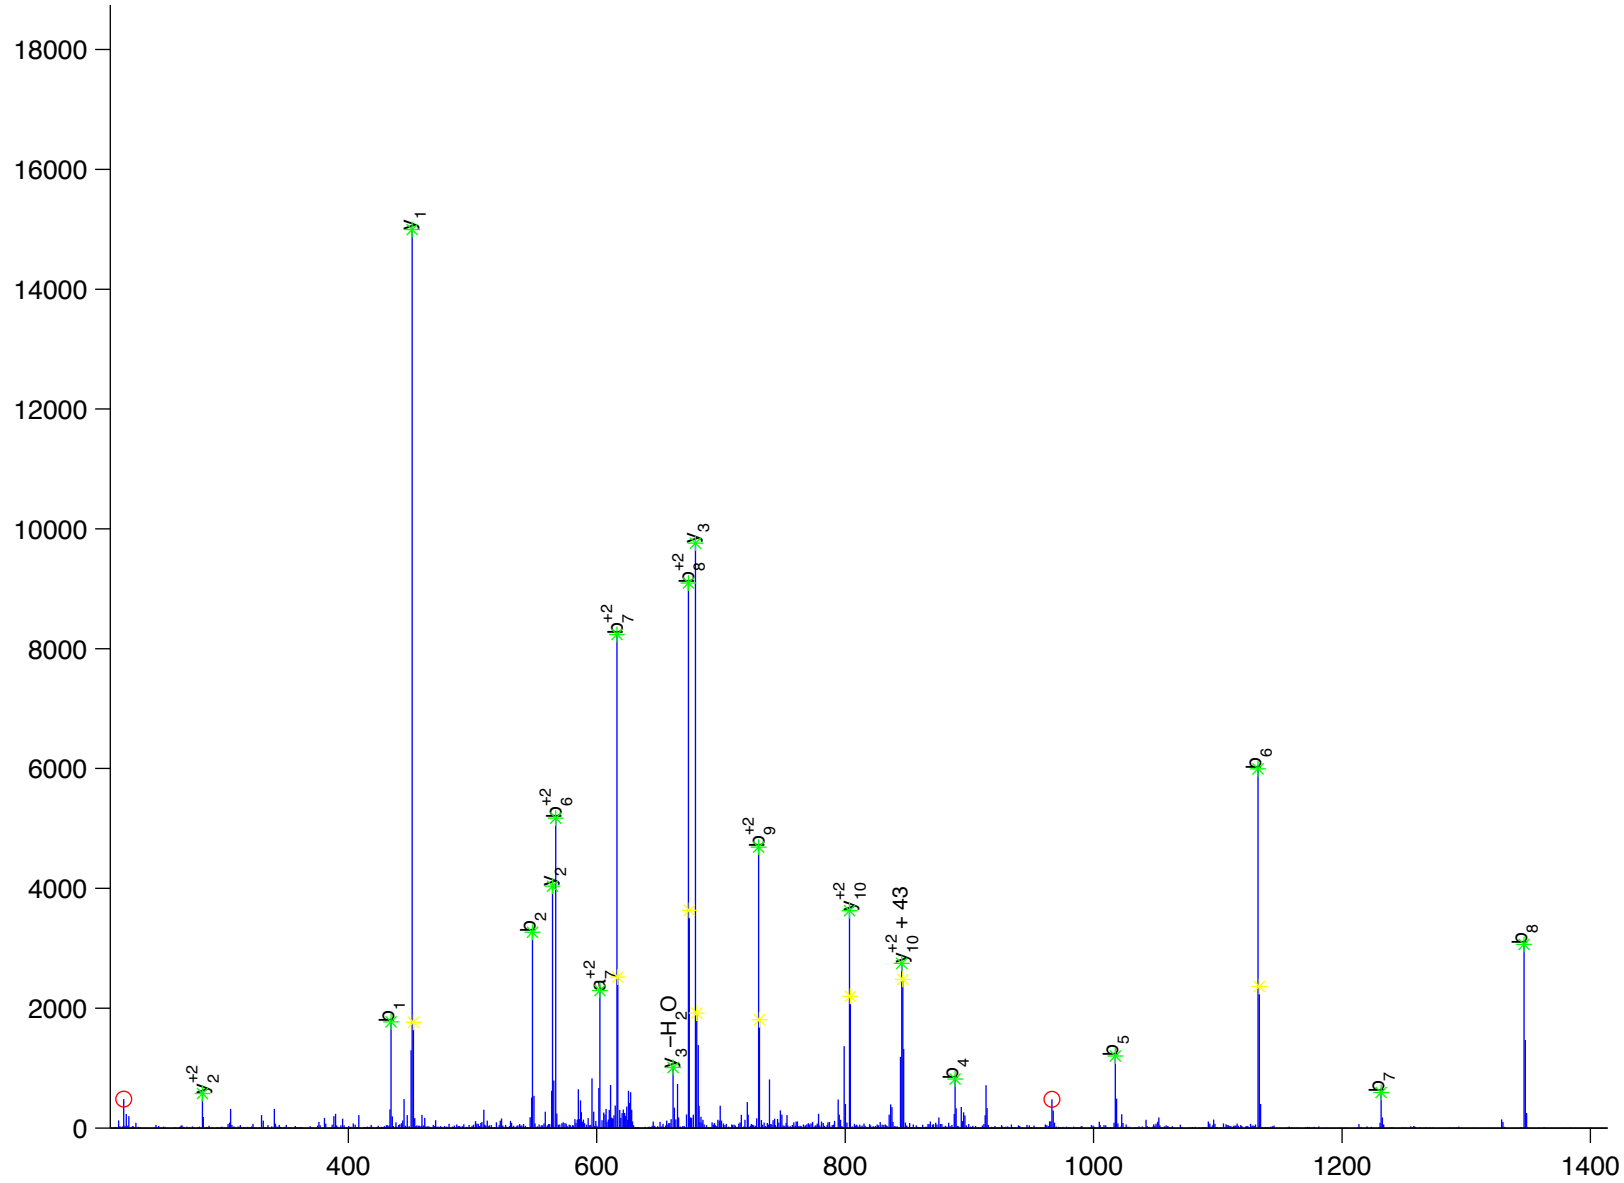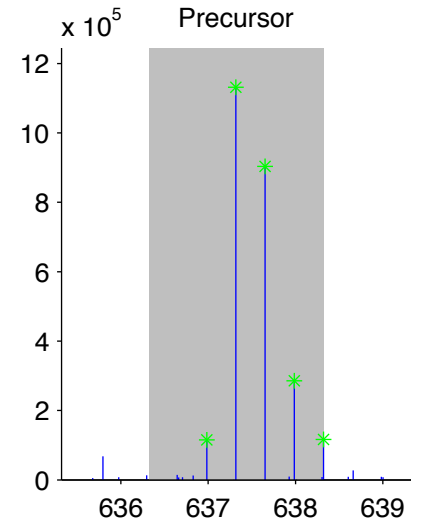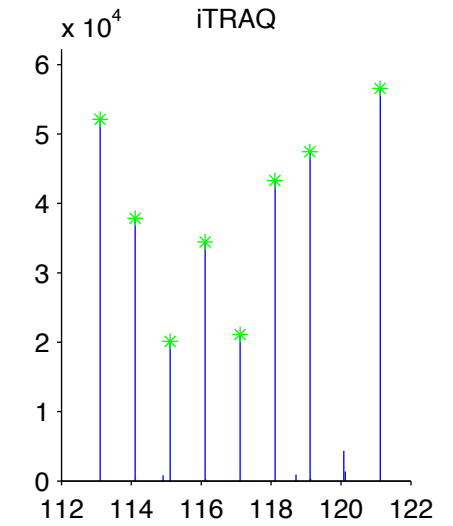

S [ T ] L [ E ] E [ N ] A [ y ] E [ D ] I [ V ] G [ G ] L [ P ] K

suppression of tumorigenicity 5 isoform 1

Charge State: +4

Scan Number: 5475

File Name: 100908ptp1blivers\_ncHFD3\_basal.raw

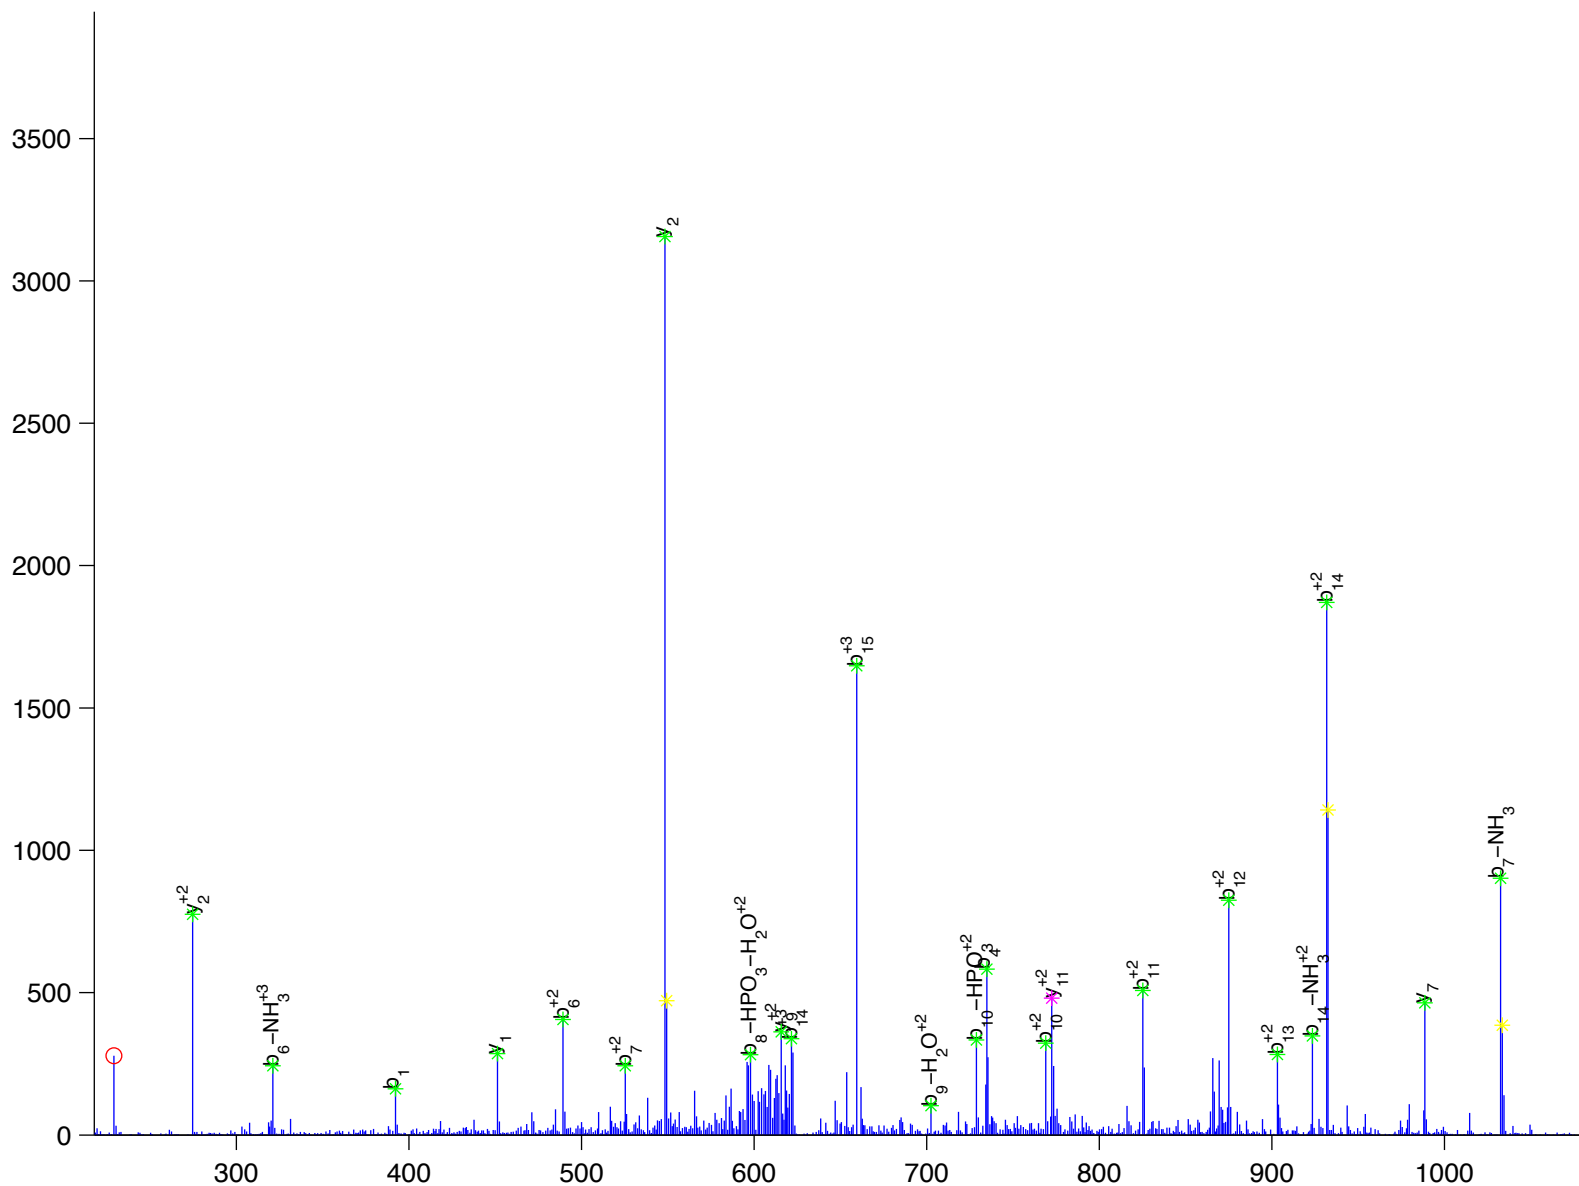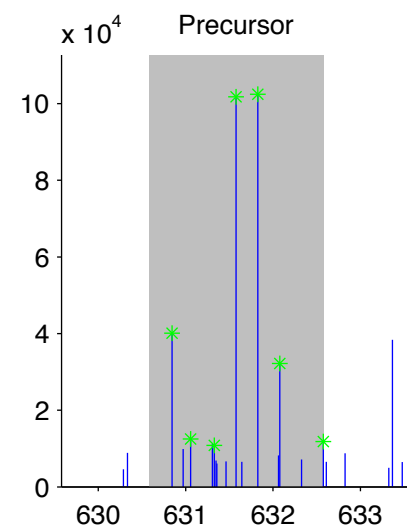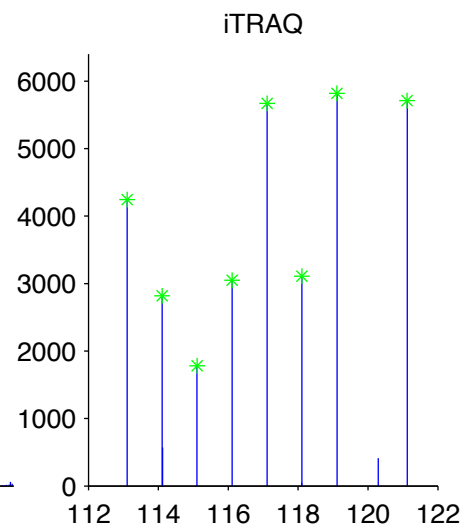

D [ N ] E [ V ] D [ G ] Q [ D ] y [ H ] F [ V ] V [ S ] R

synapse-associated protein 102

Charge State: +3

Scan Number: 4135

File Name: 090806ptp1blivers\_M\_NC2.raw

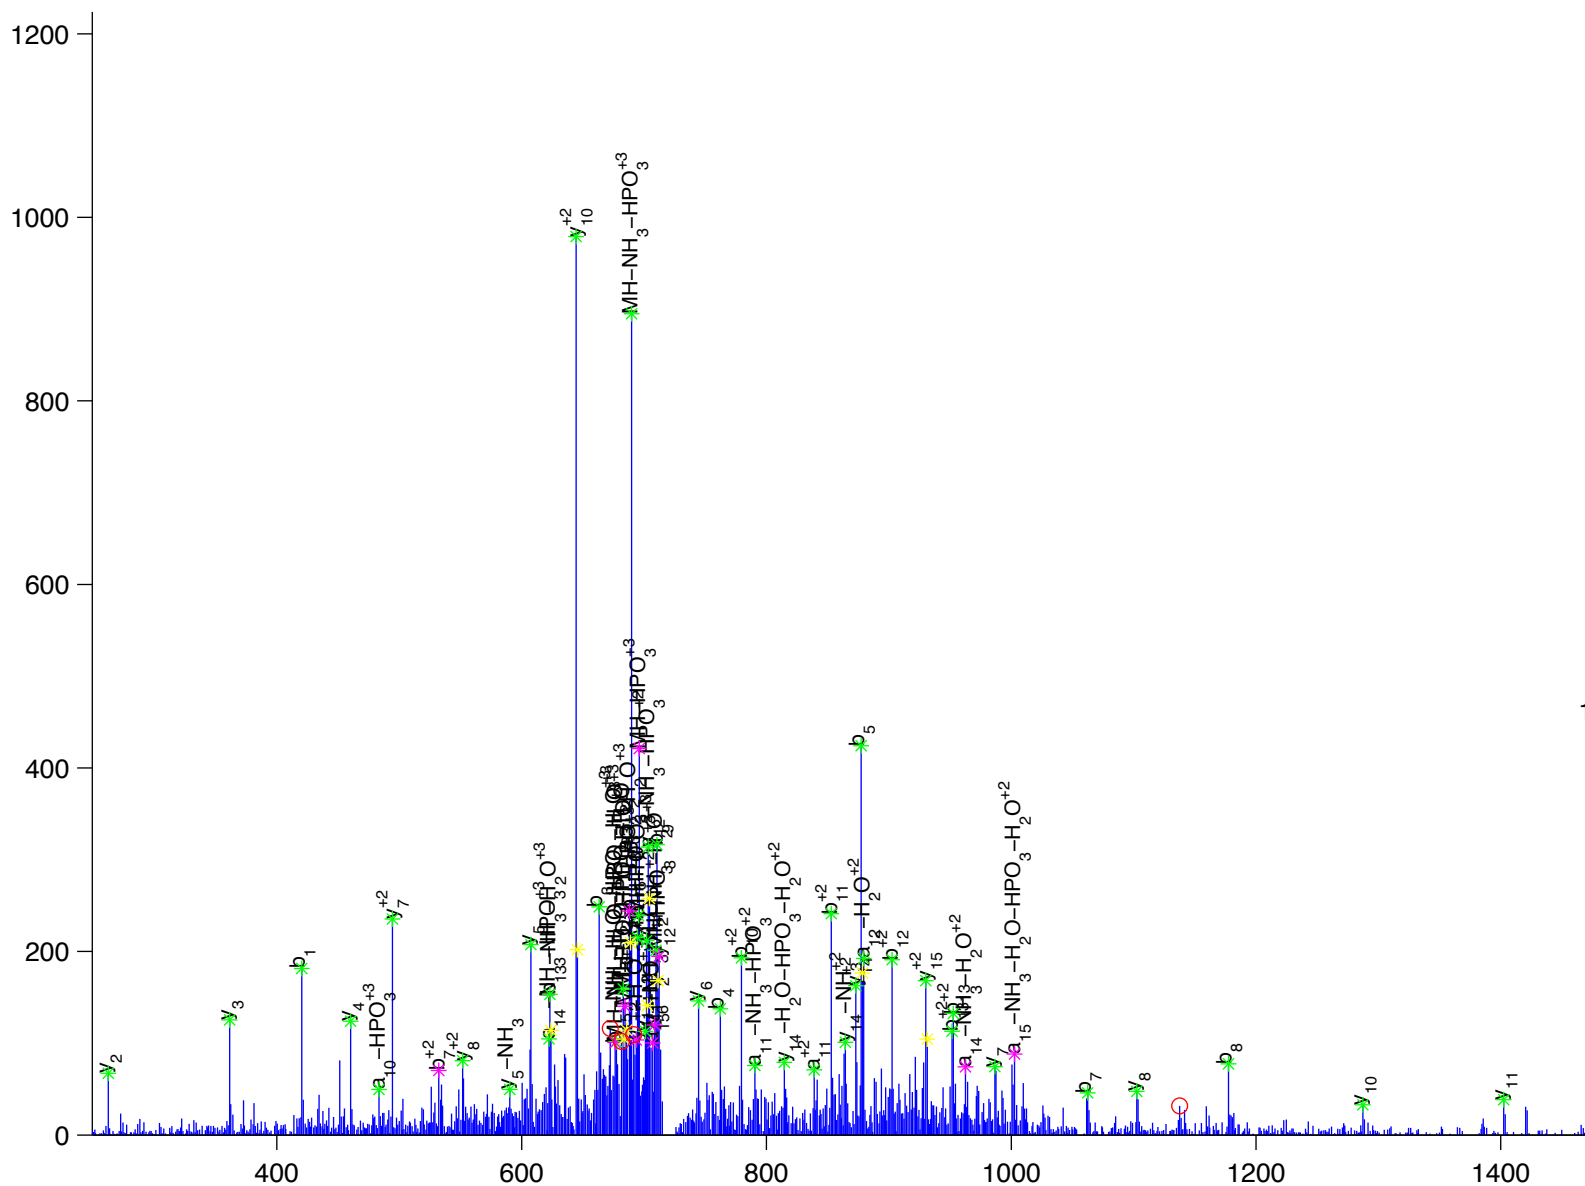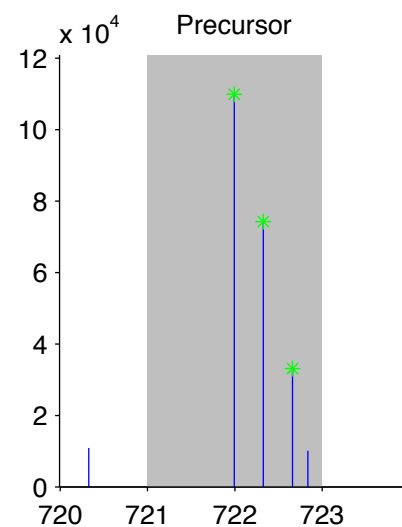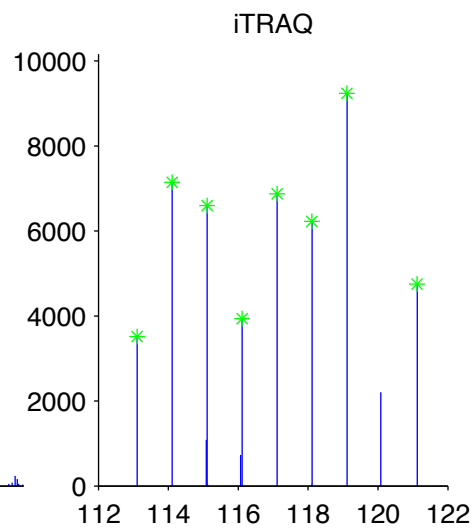

R[D]N[E]V[D]G[Q]D[y]H[F]V[V]S[R]

synapse-associated protein 102

Charge State: +3

Scan Number: 4296

File Name: 091130ptp1blivers\_hfd\_basal2.raw

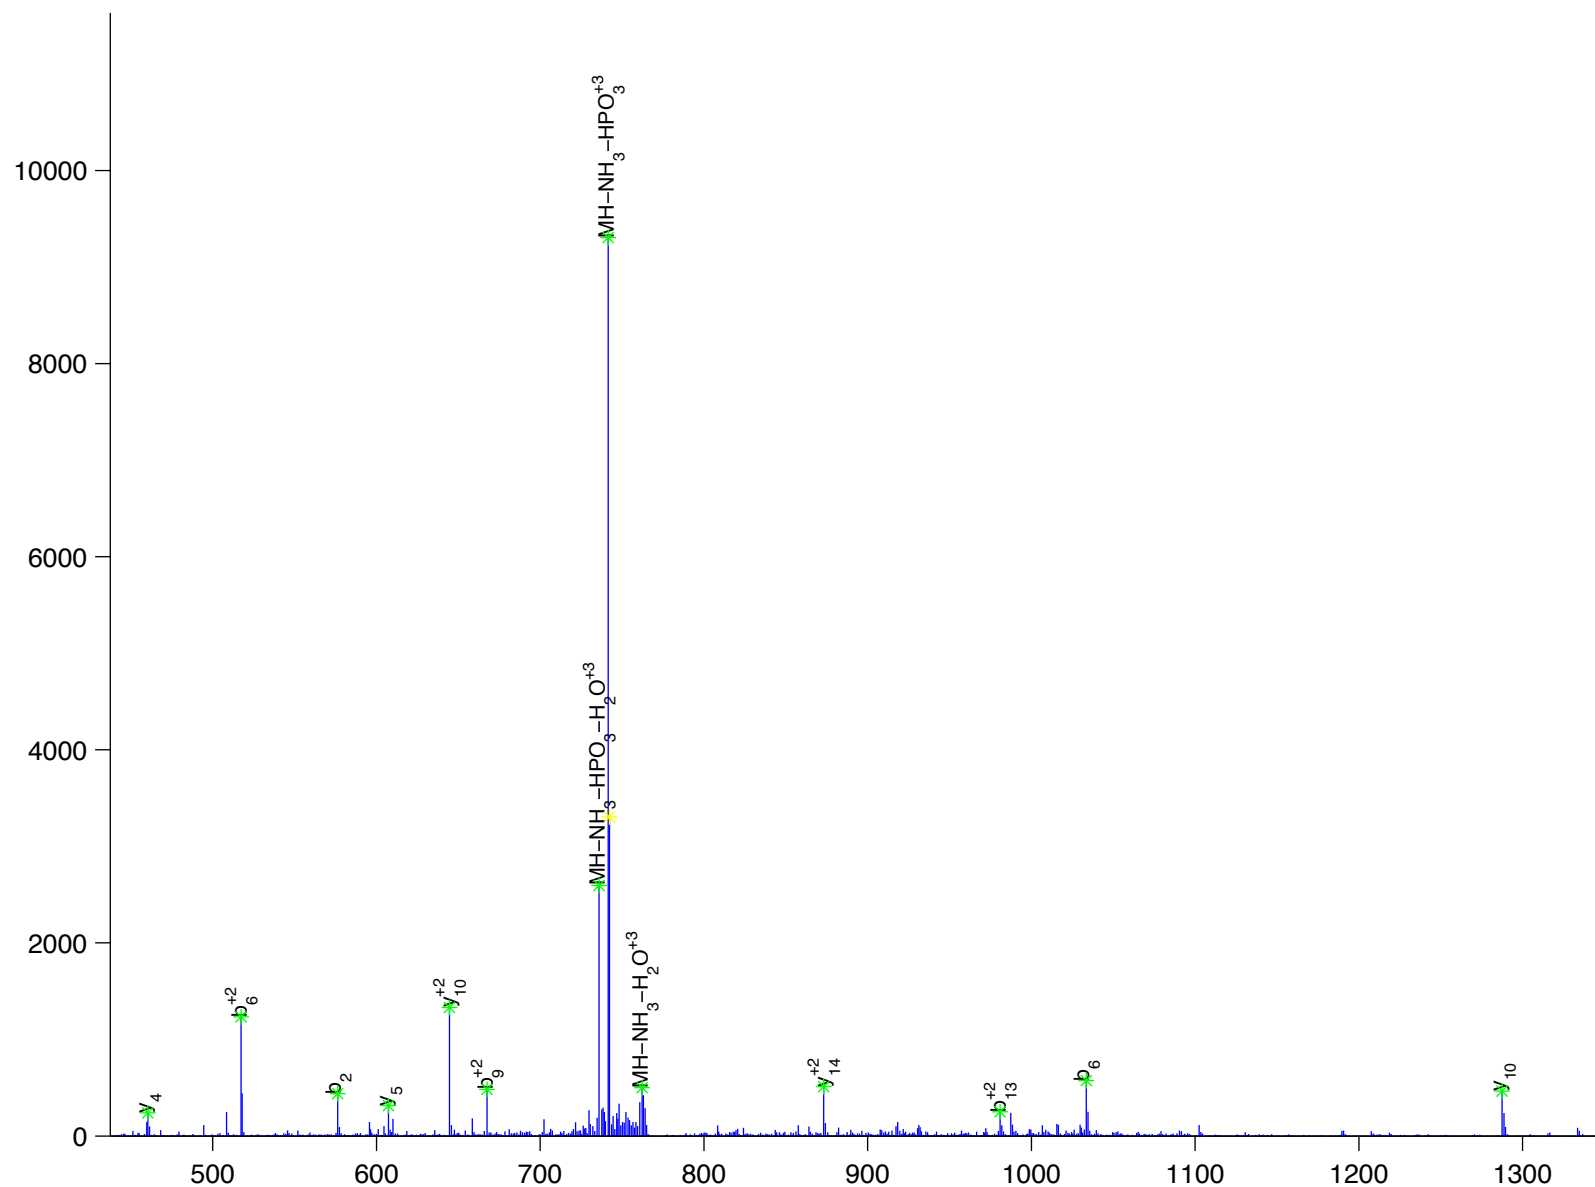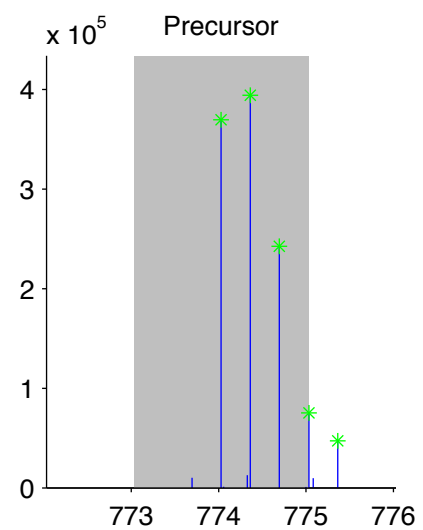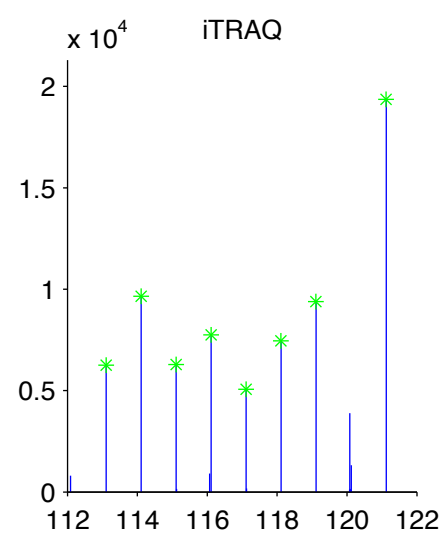

T [ M ] Q [ F ] E [ P ] S [ T ] M [ V ] y [ D ] A [ C ] R

talin 1  
 Charge State: +3  
 Scan Number: 2385  
 File Name: HJ072909\_HFD\_E1\_2.raw

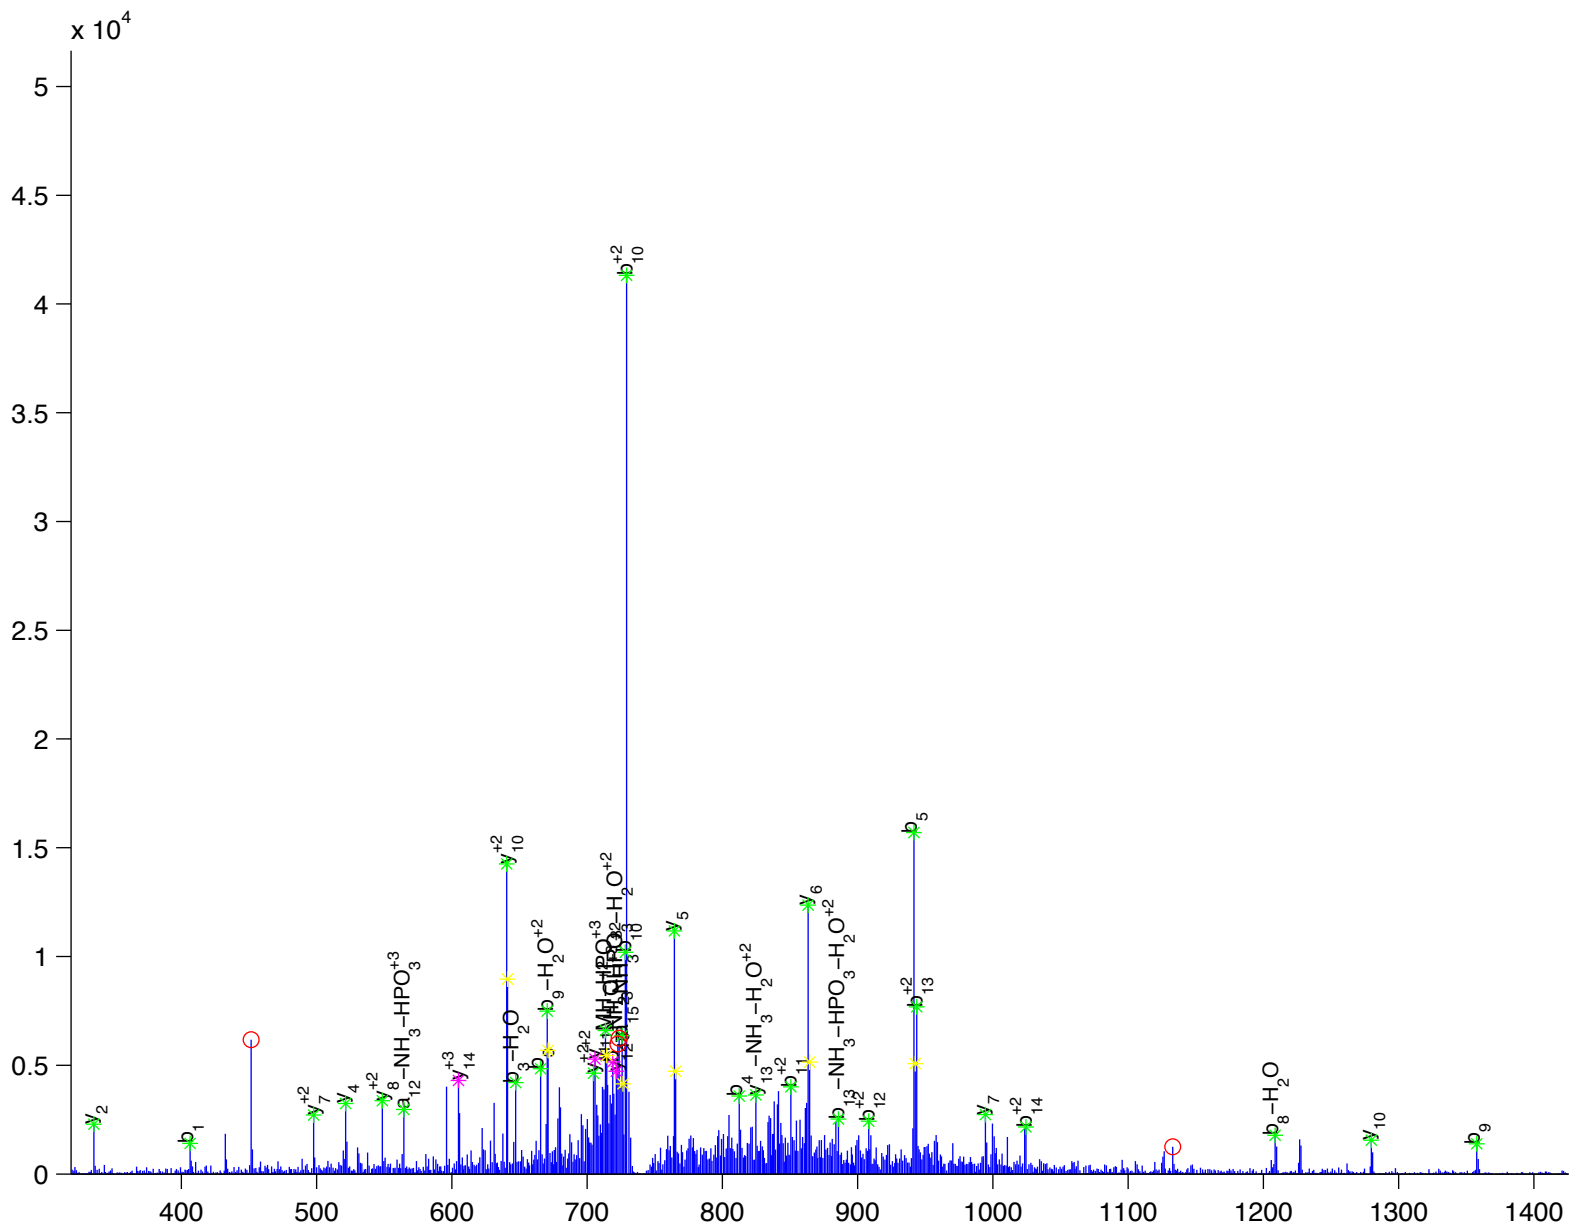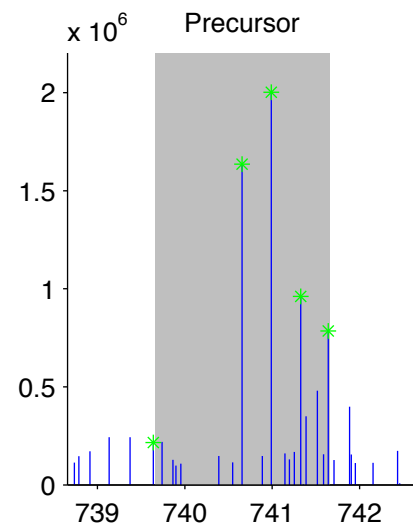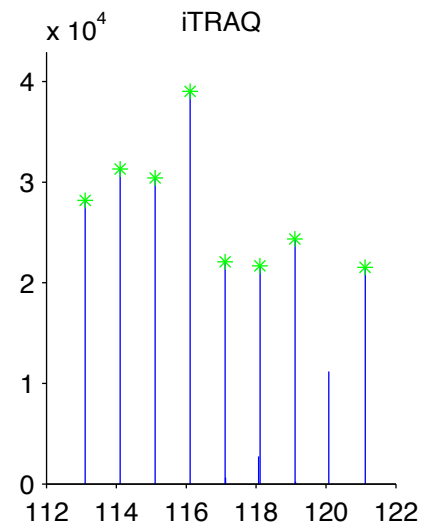

L L G E I A Q G N E N y A G I A A R

taln 1

Charge State: +3

Scan Number: 6064

File Name: 100905ptp1blivers\_ncHFD\_basal.raw

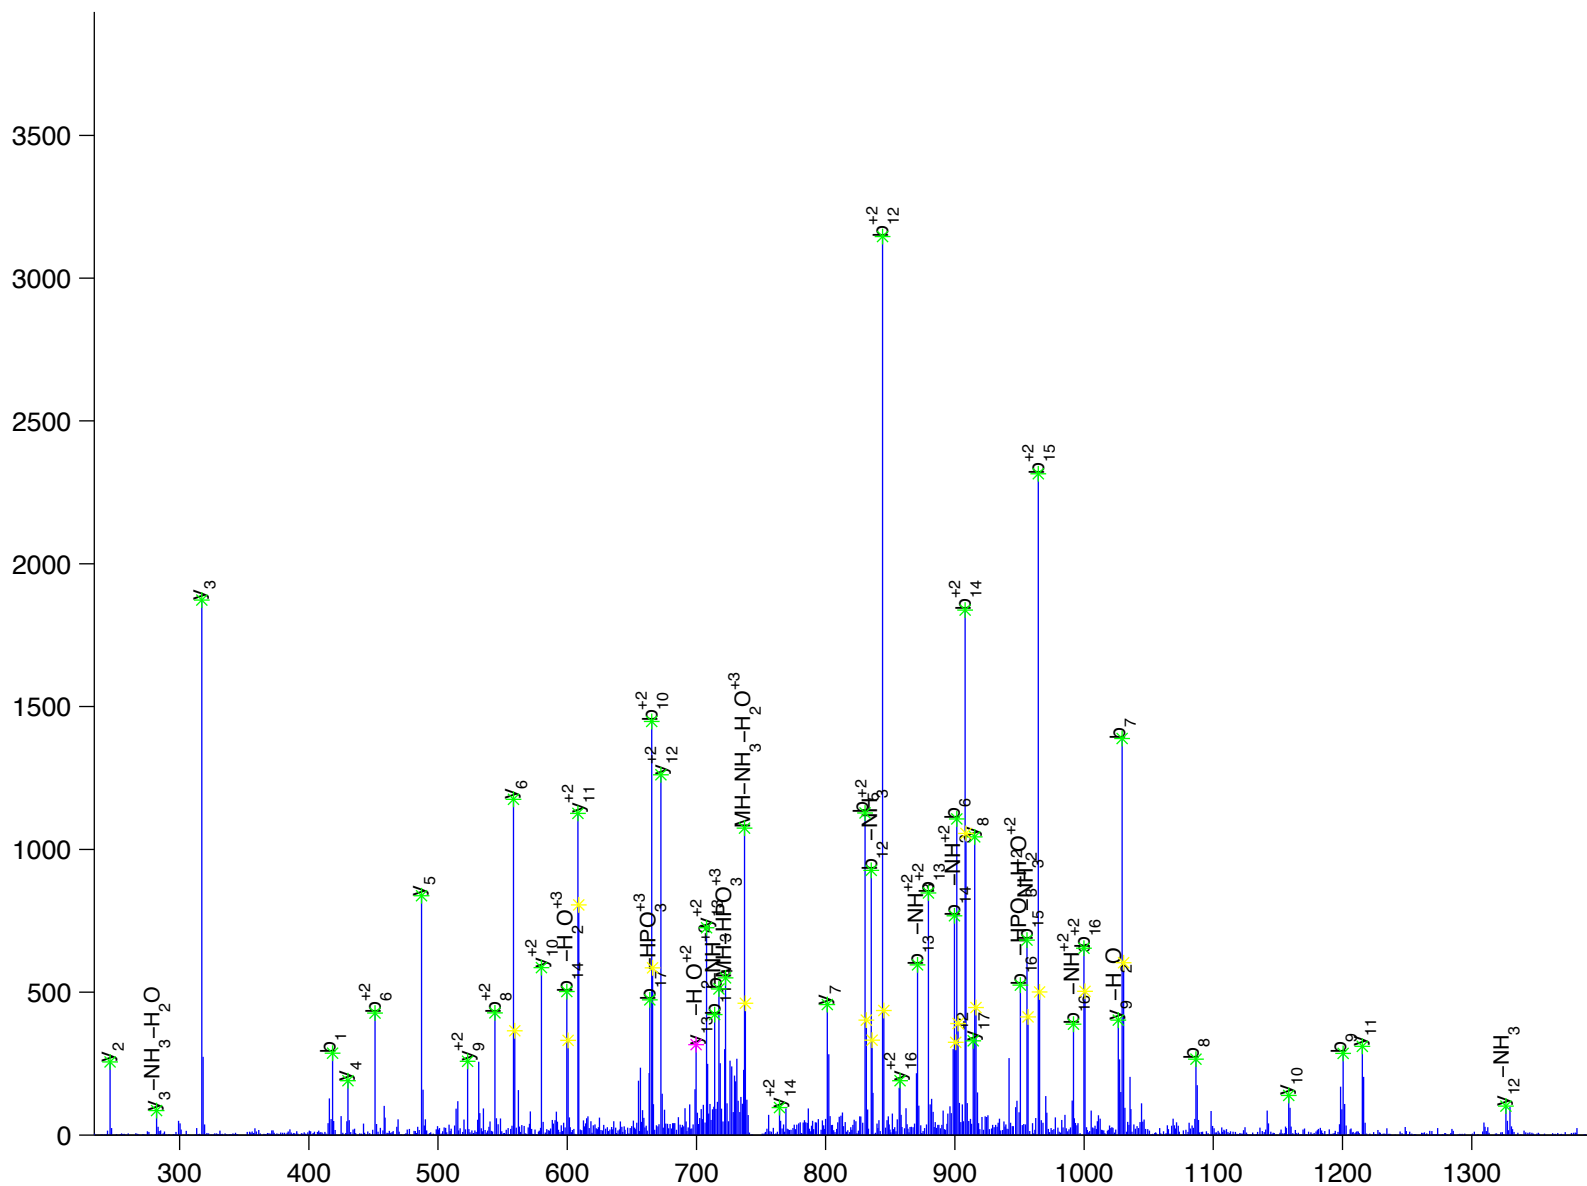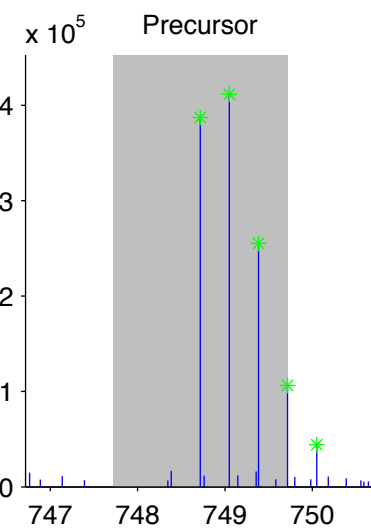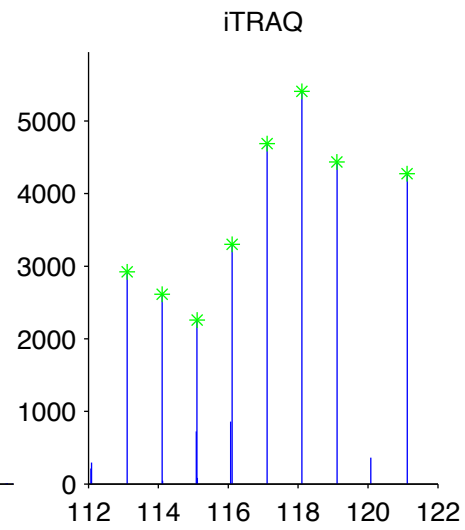



E [ C ] D y S I D G I N R

taln 2

Charge State: +3

Scan Number: 3432

File Name: 100908ptp1blivers\_ncHFD3\_basal.raw

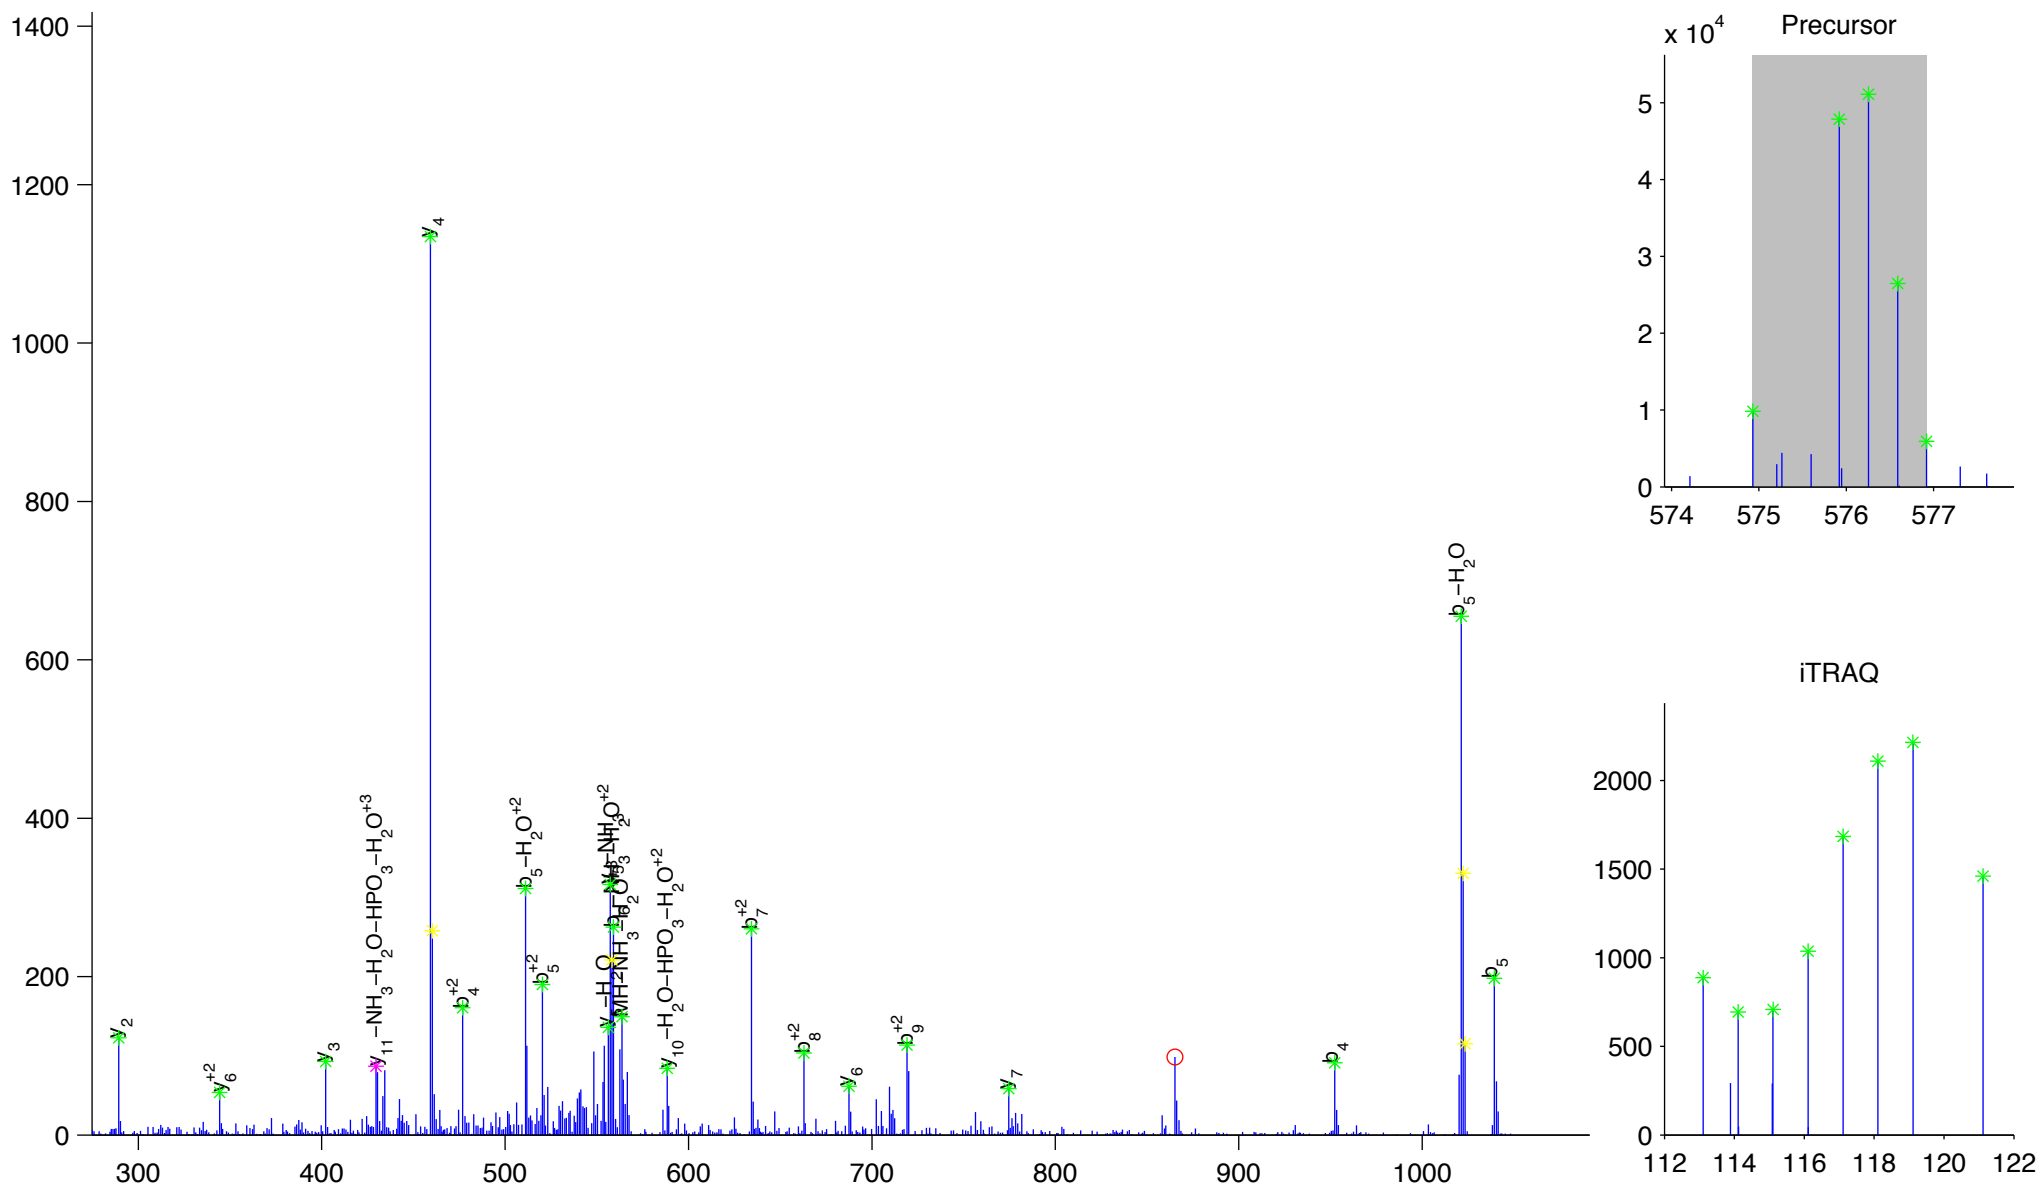





A [G] S [L] P [N] y [A] T [I] [N] G [K]

tensin 1  
 Charge State: +3  
 Scan Number: 5002  
 File Name: 091130ptp1blivers\_hfd\_basal2.raw

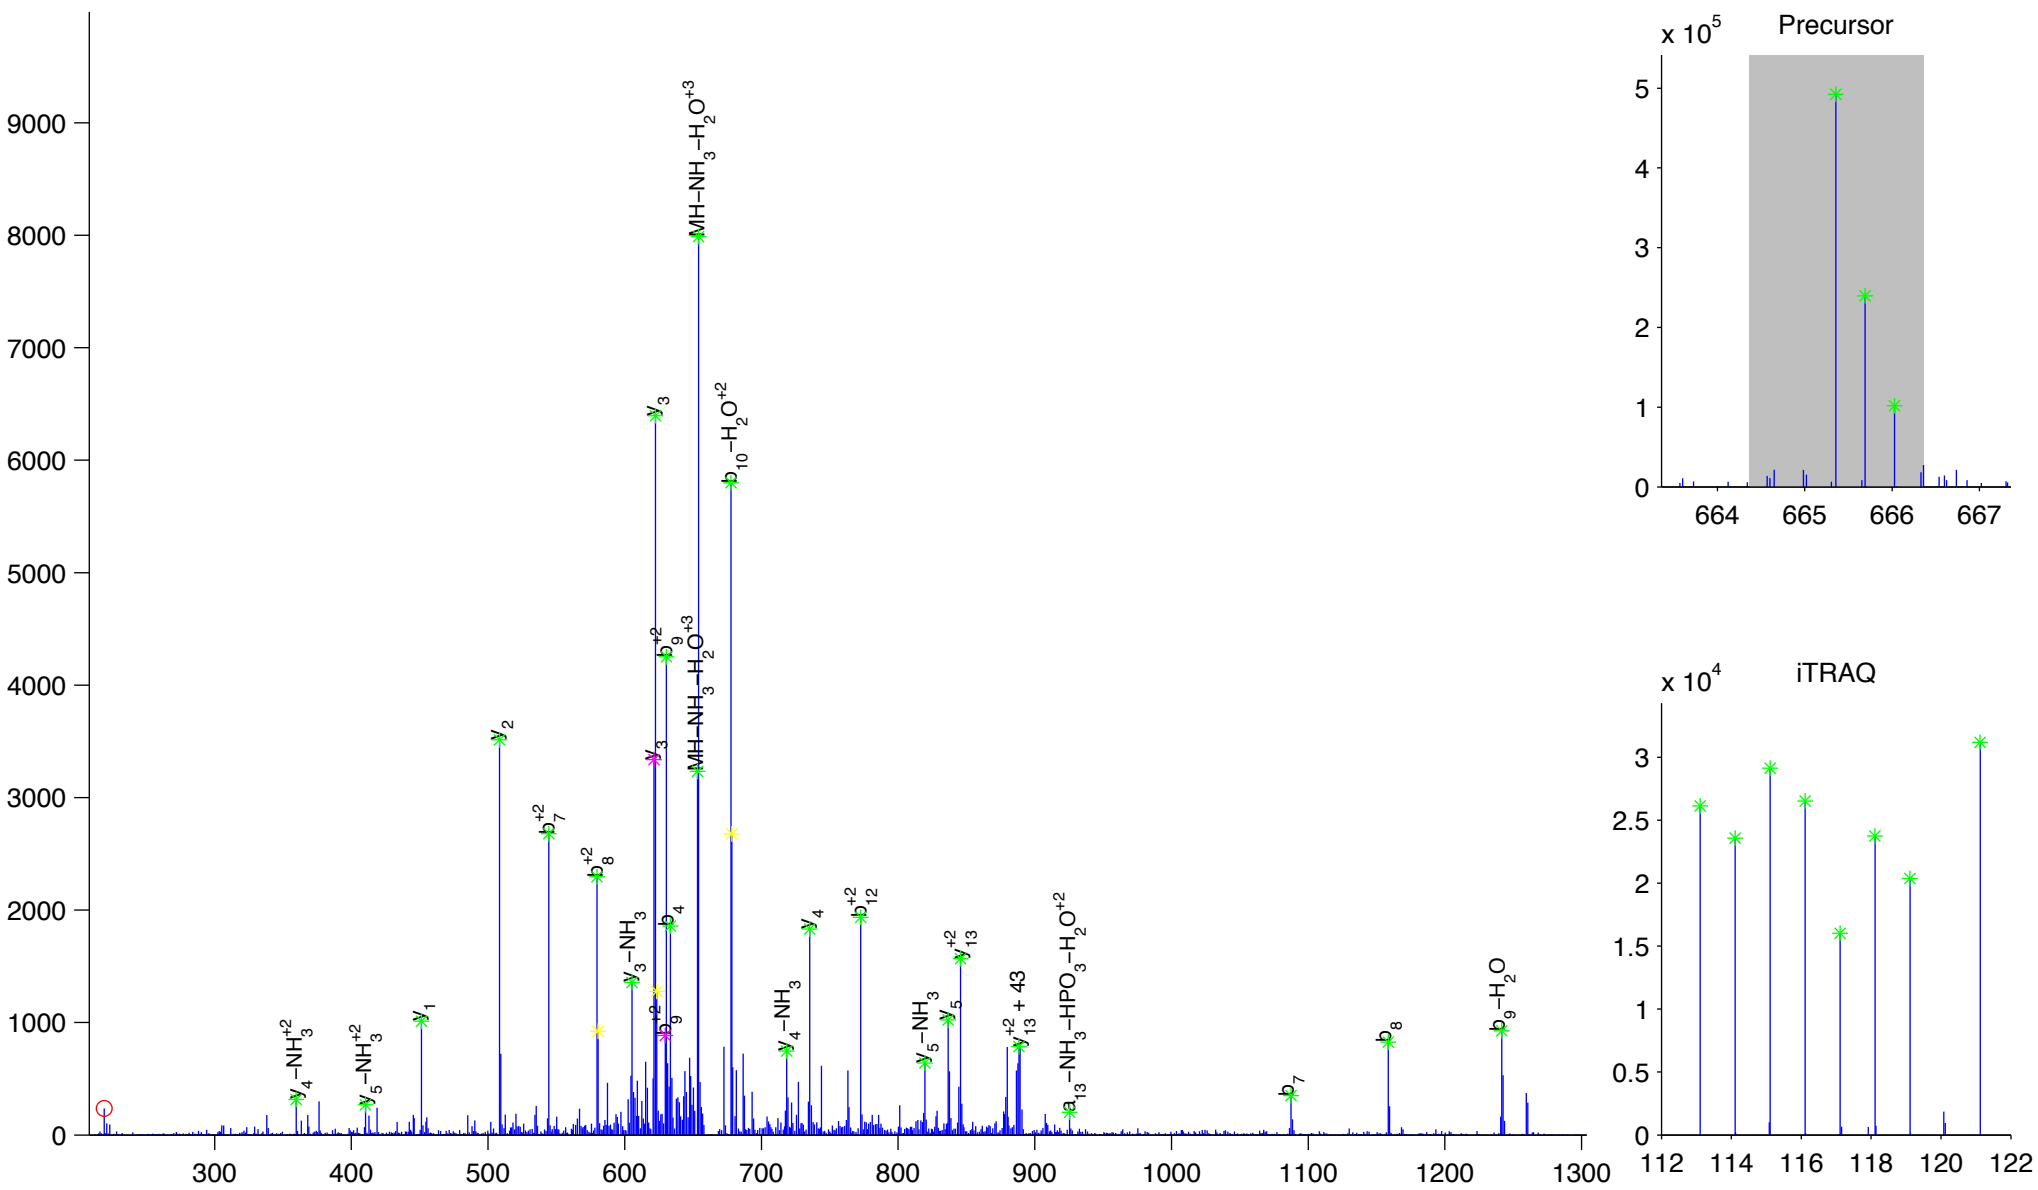

E [ D ] [ G ] [ M ] [ E ] [ E ] [ V ] [ V ] [ G ] [ H ] [ T ] [ Q ] [ G ] [ P ] [ L ] [ D ] [ G ] [ S ] [ L ] y [ A ] K

tensin 1  
 Charge State: +3  
 Scan Number: 6344  
 File Name: 091130ptp1blivers\_hfd\_basal2.raw

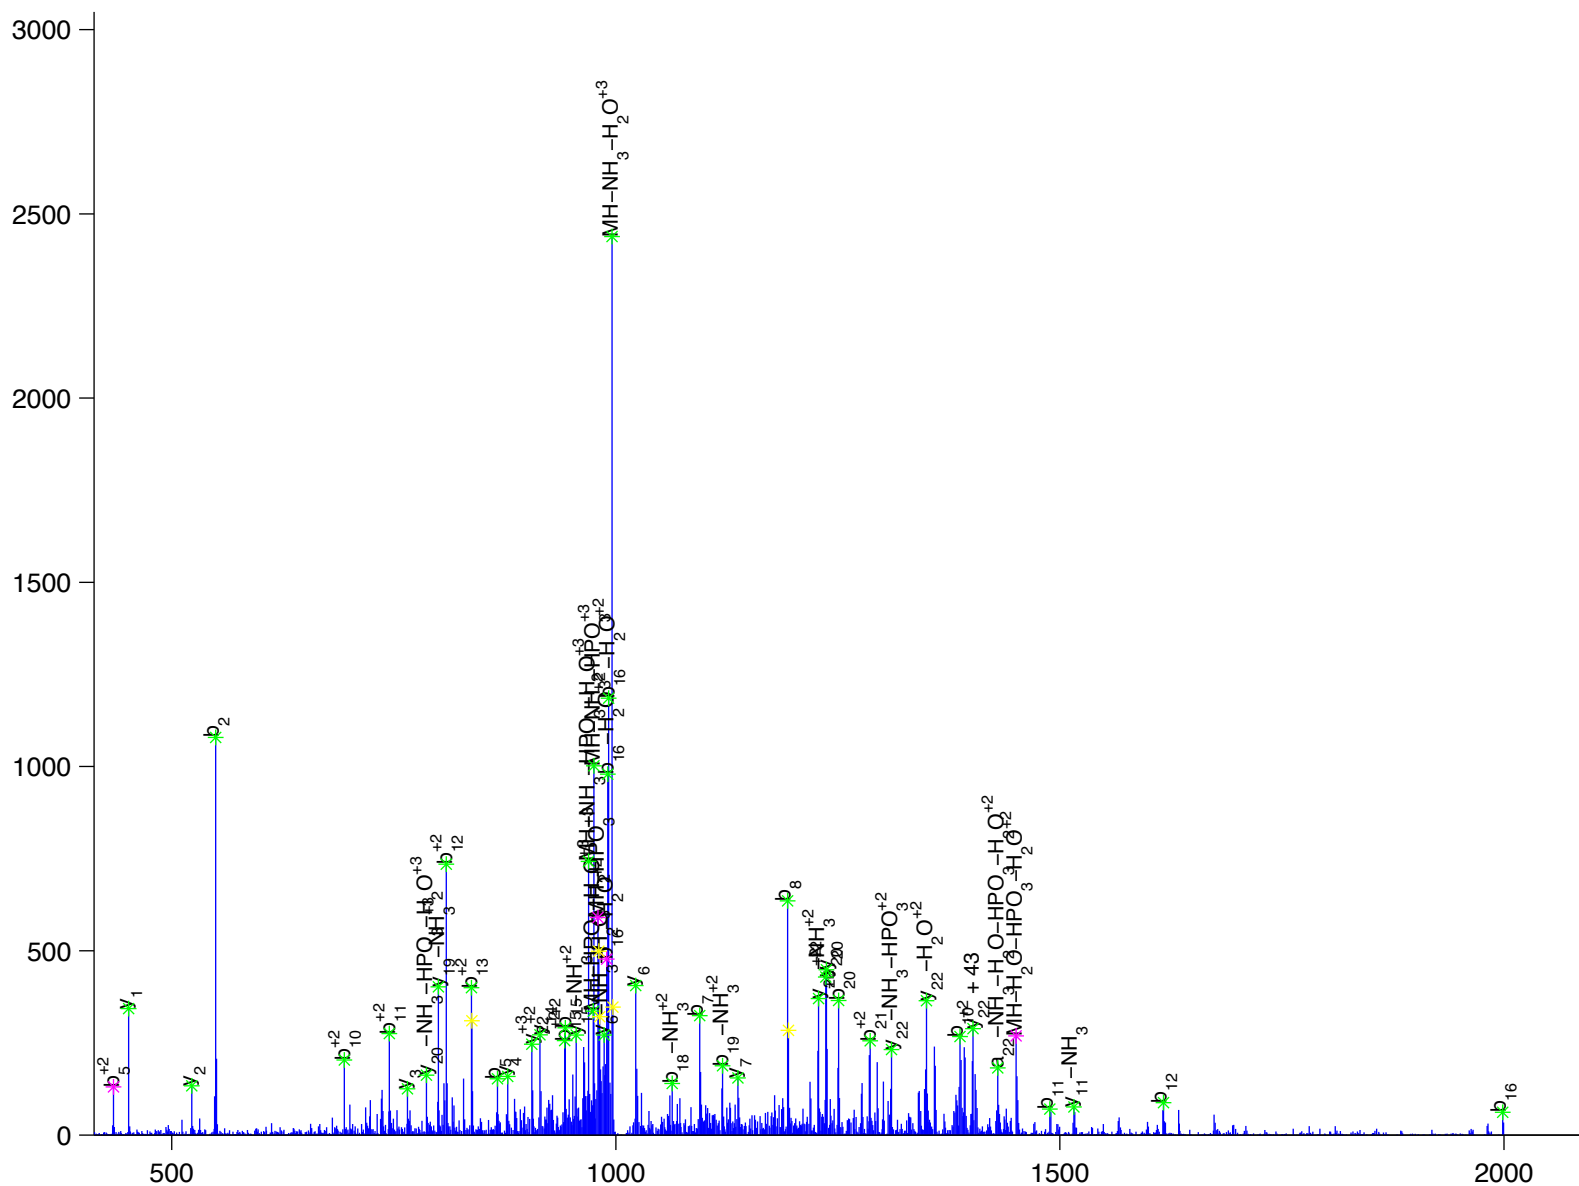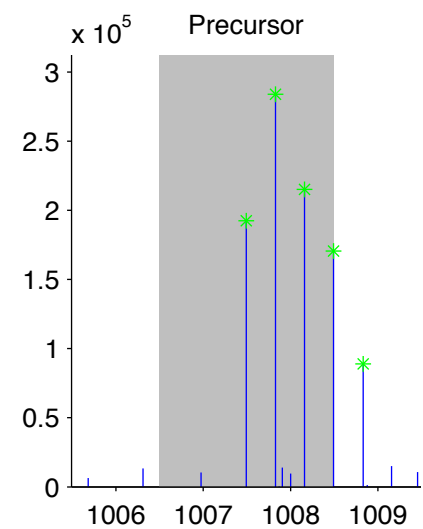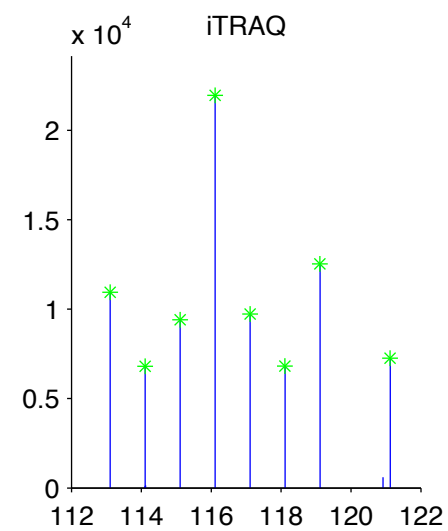

W [ D ] s [ Y ] E [ N ] M [ S ] A [ D ] G [ E ] V [ L ] H [ T ] Q [ G ] P [ V ] D [ G ] S [ L ] y [ A ] K

tensin 3  
 Charge State: +4  
 Scan Number: 5022  
 File Name: 100827ptp1blivers\_ncHFD\_basal.raw

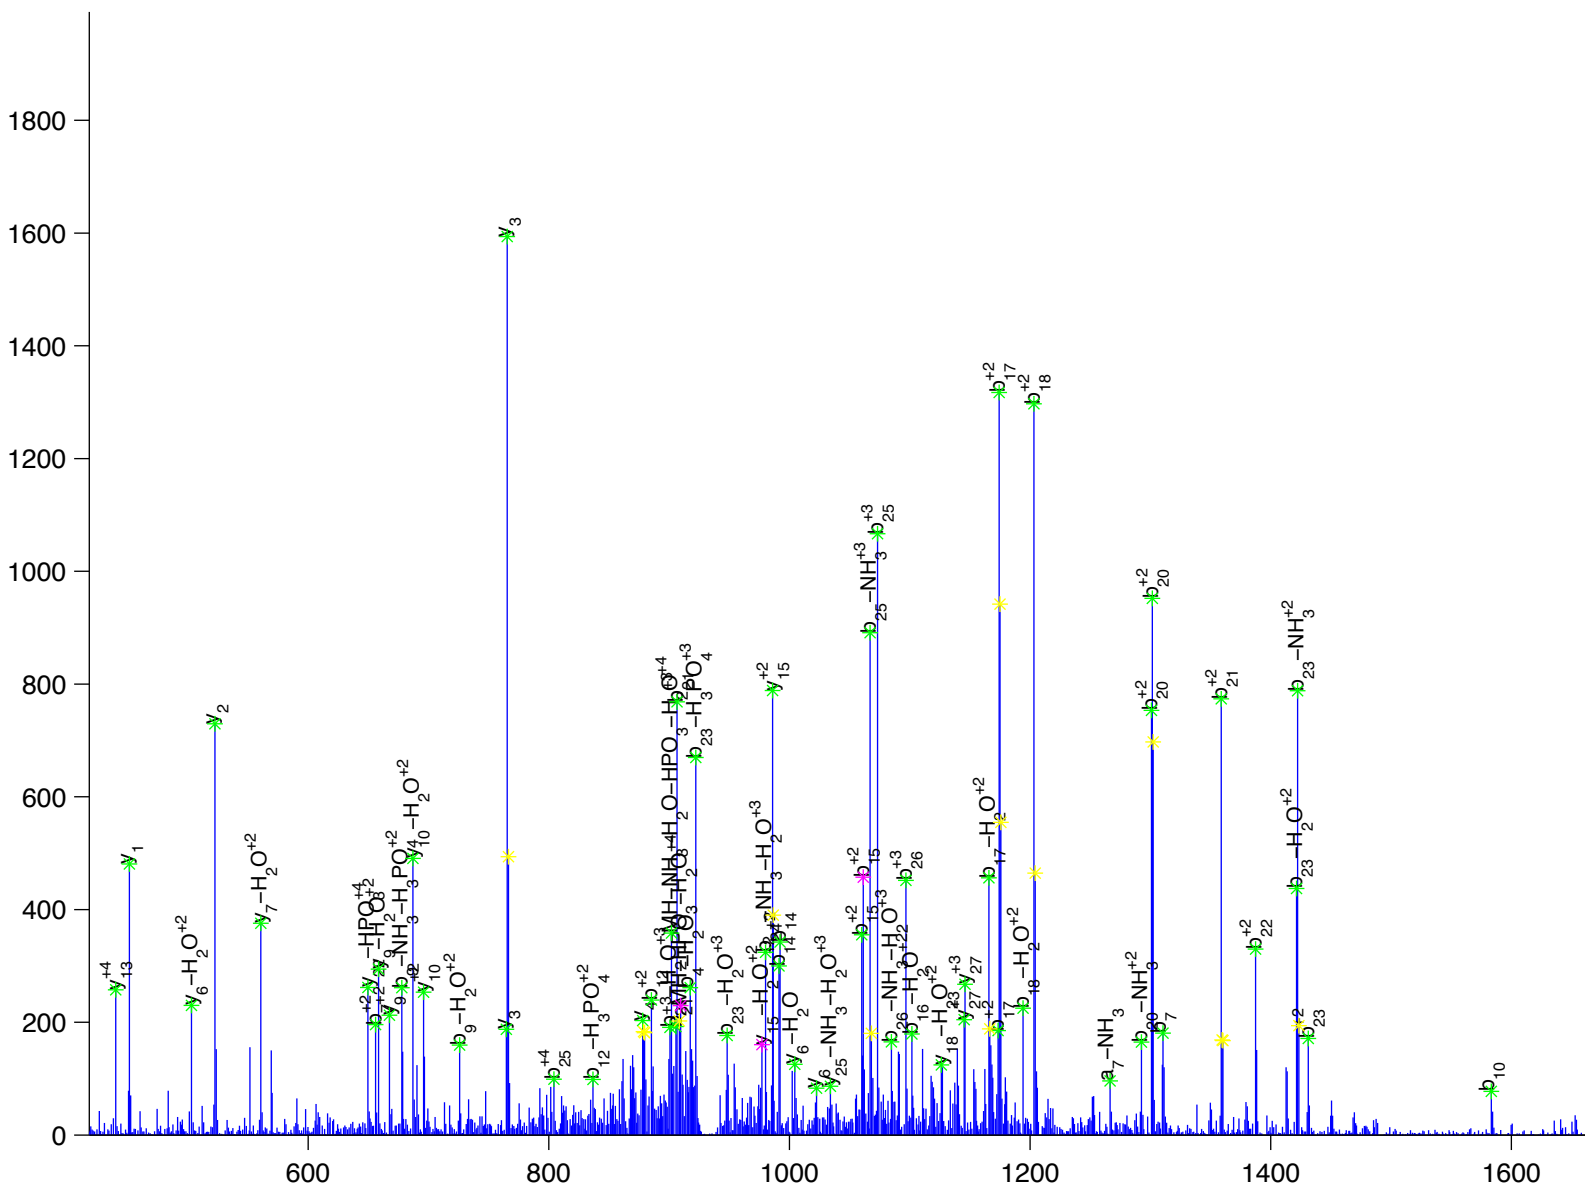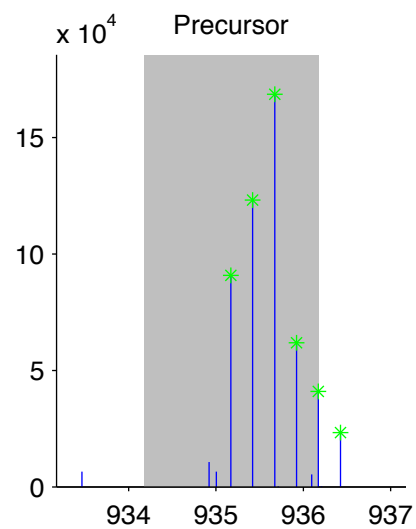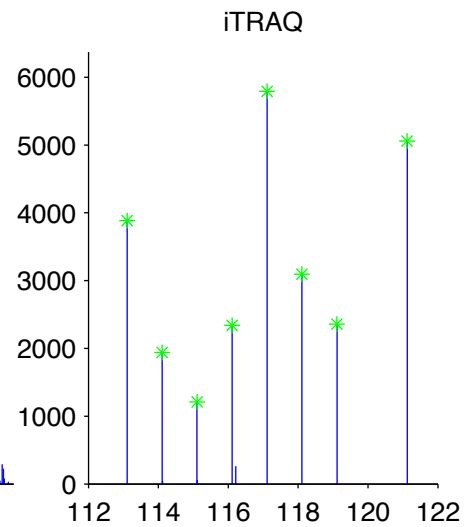

W [ D ] S y [ E ] N [ M ] S [ A ] D [ G ] E [ V ] L [ H ] T [ Q ] G [ P ] V [ D ] G [ S ] L y [ A ] K

tensin 3

Charge State: +4

Scan Number: 5022

File Name: 100827ptp1blivers\_ncHFD\_basal.raw

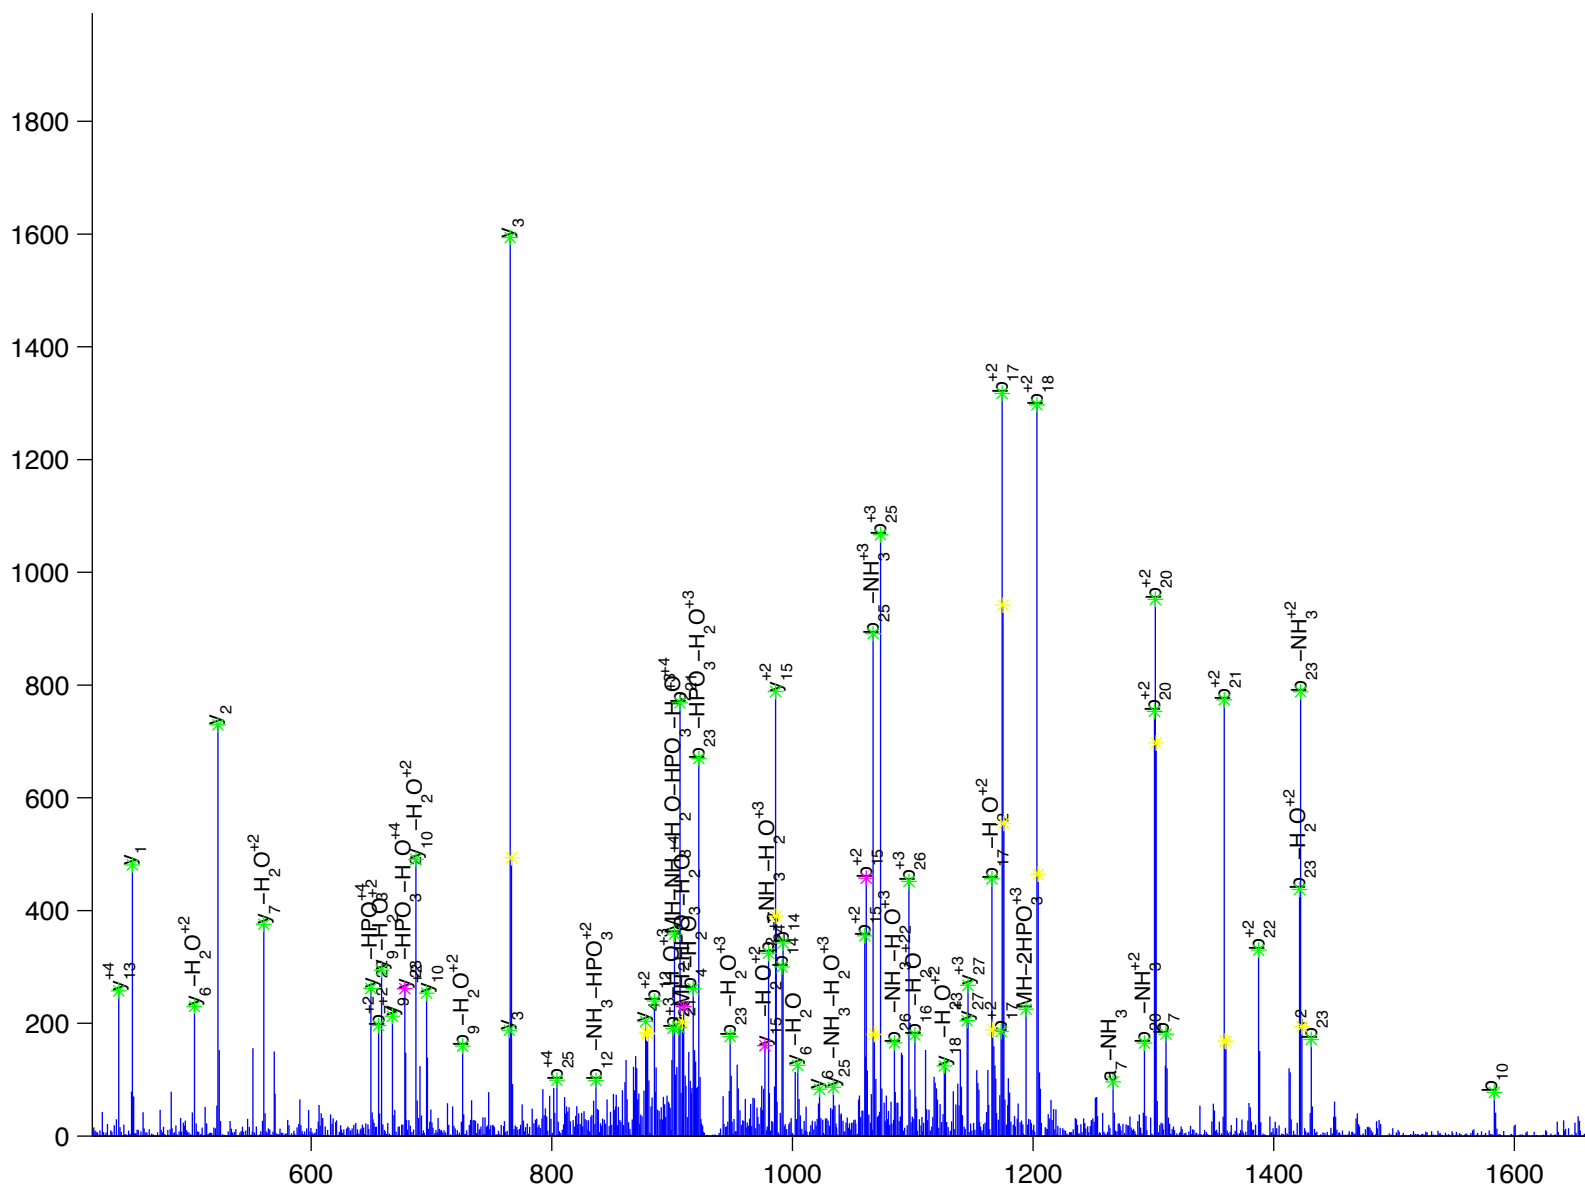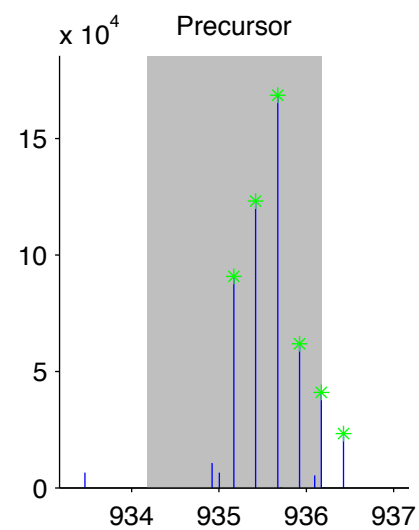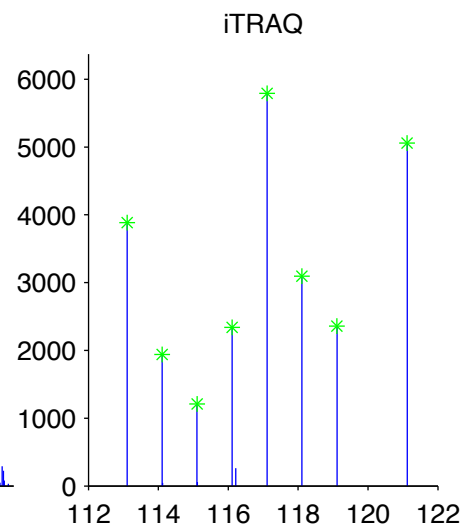





W [ D ] S [ Y ] E [ N ] M [ S ] A [ D ] G [ E ] V [ L ] H [ t ] Q [ G ] P [ V ] D [ G ] S [ L ] y [ A ] K

tensin 3

Charge State: +4

Scan Number: 5022

File Name: 100827ptp1blivers\_ncHFD\_basal.raw

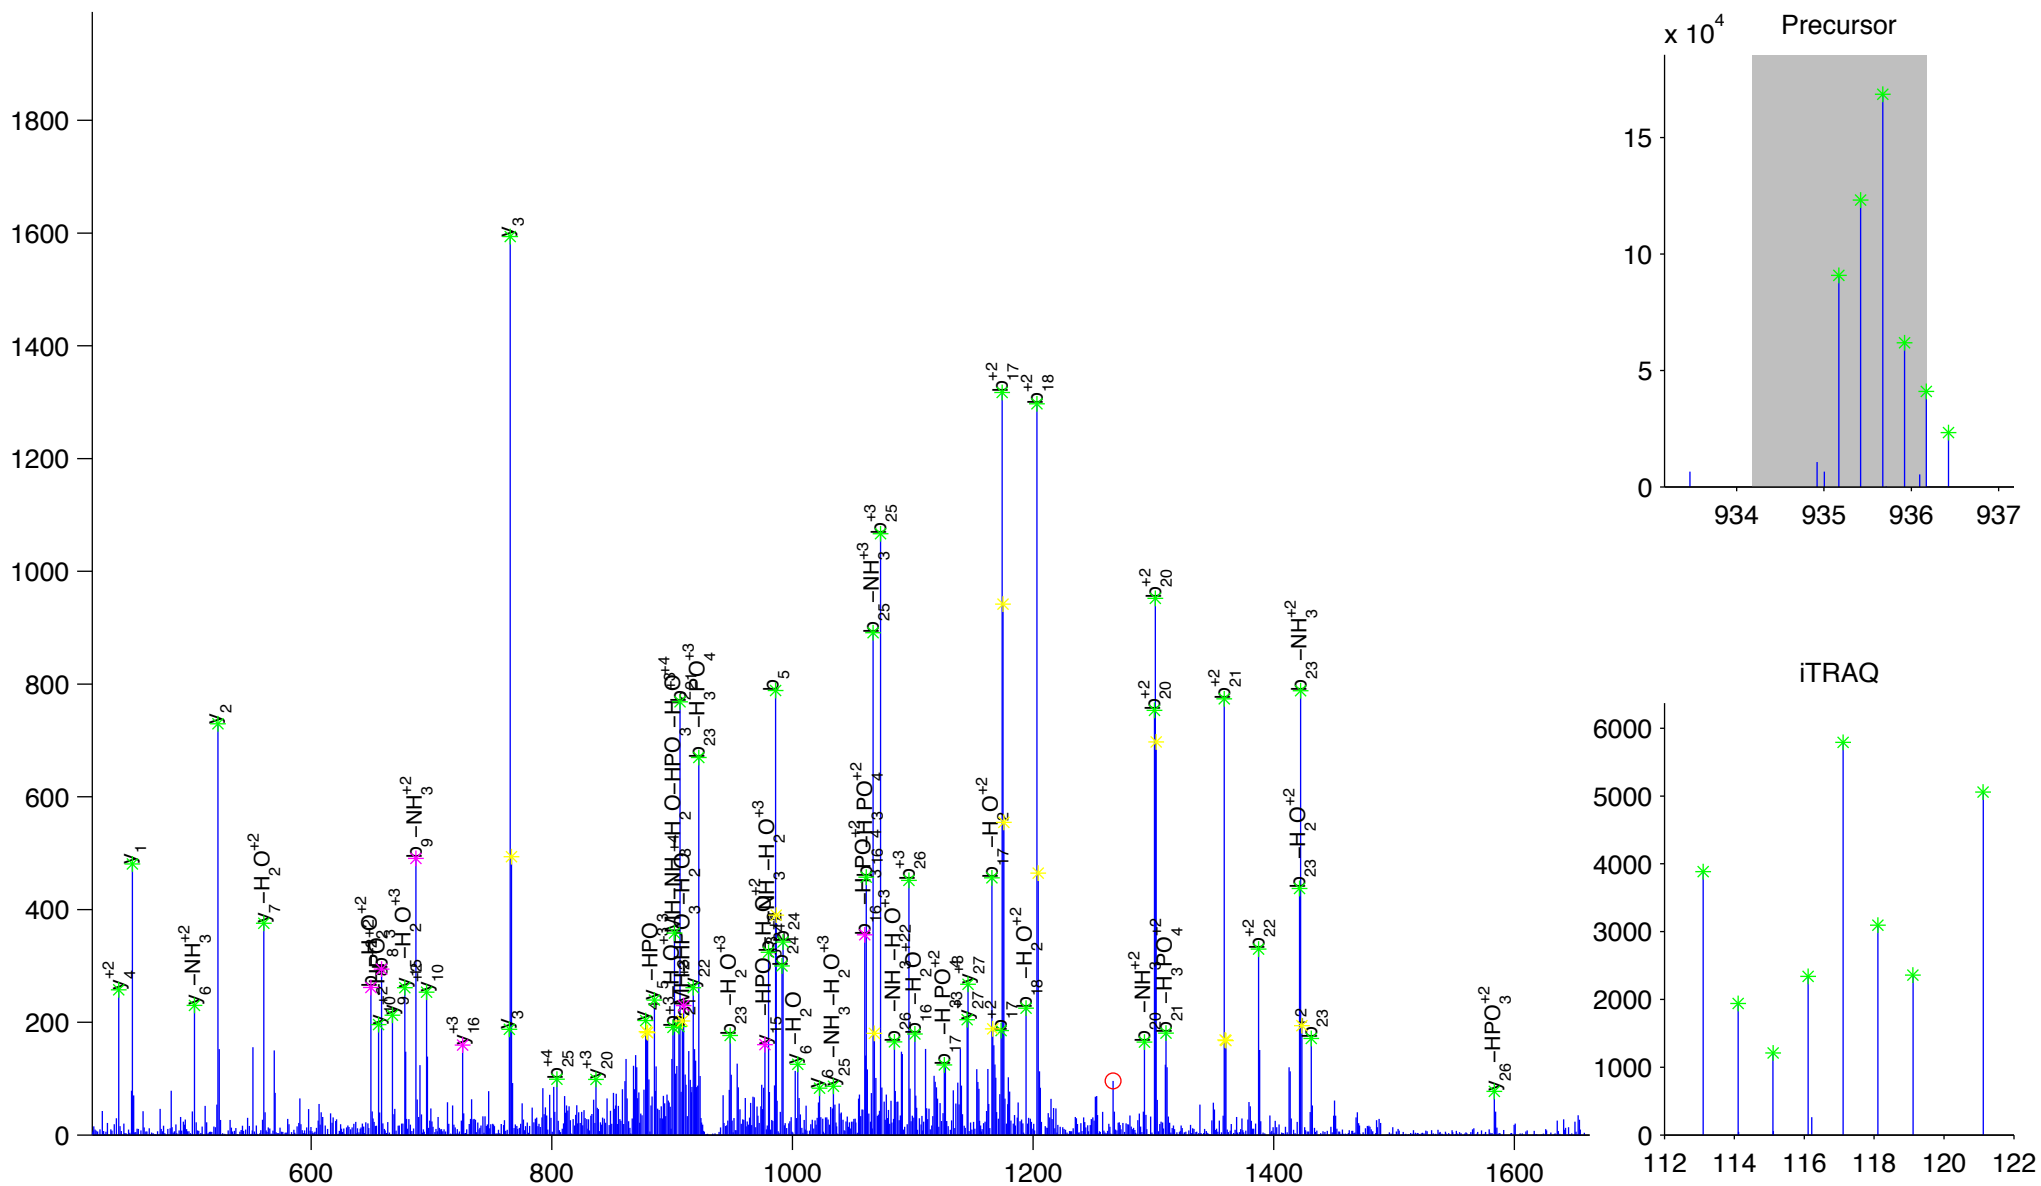

I [ y ] G [ I ] S [ F ] P [ D ] P [ K ]

threonyl-tRNA synthetase

Charge State: +3

Scan Number: 9741

File Name: 090807ptp1blivers\_M\_HFD\_basal.raw

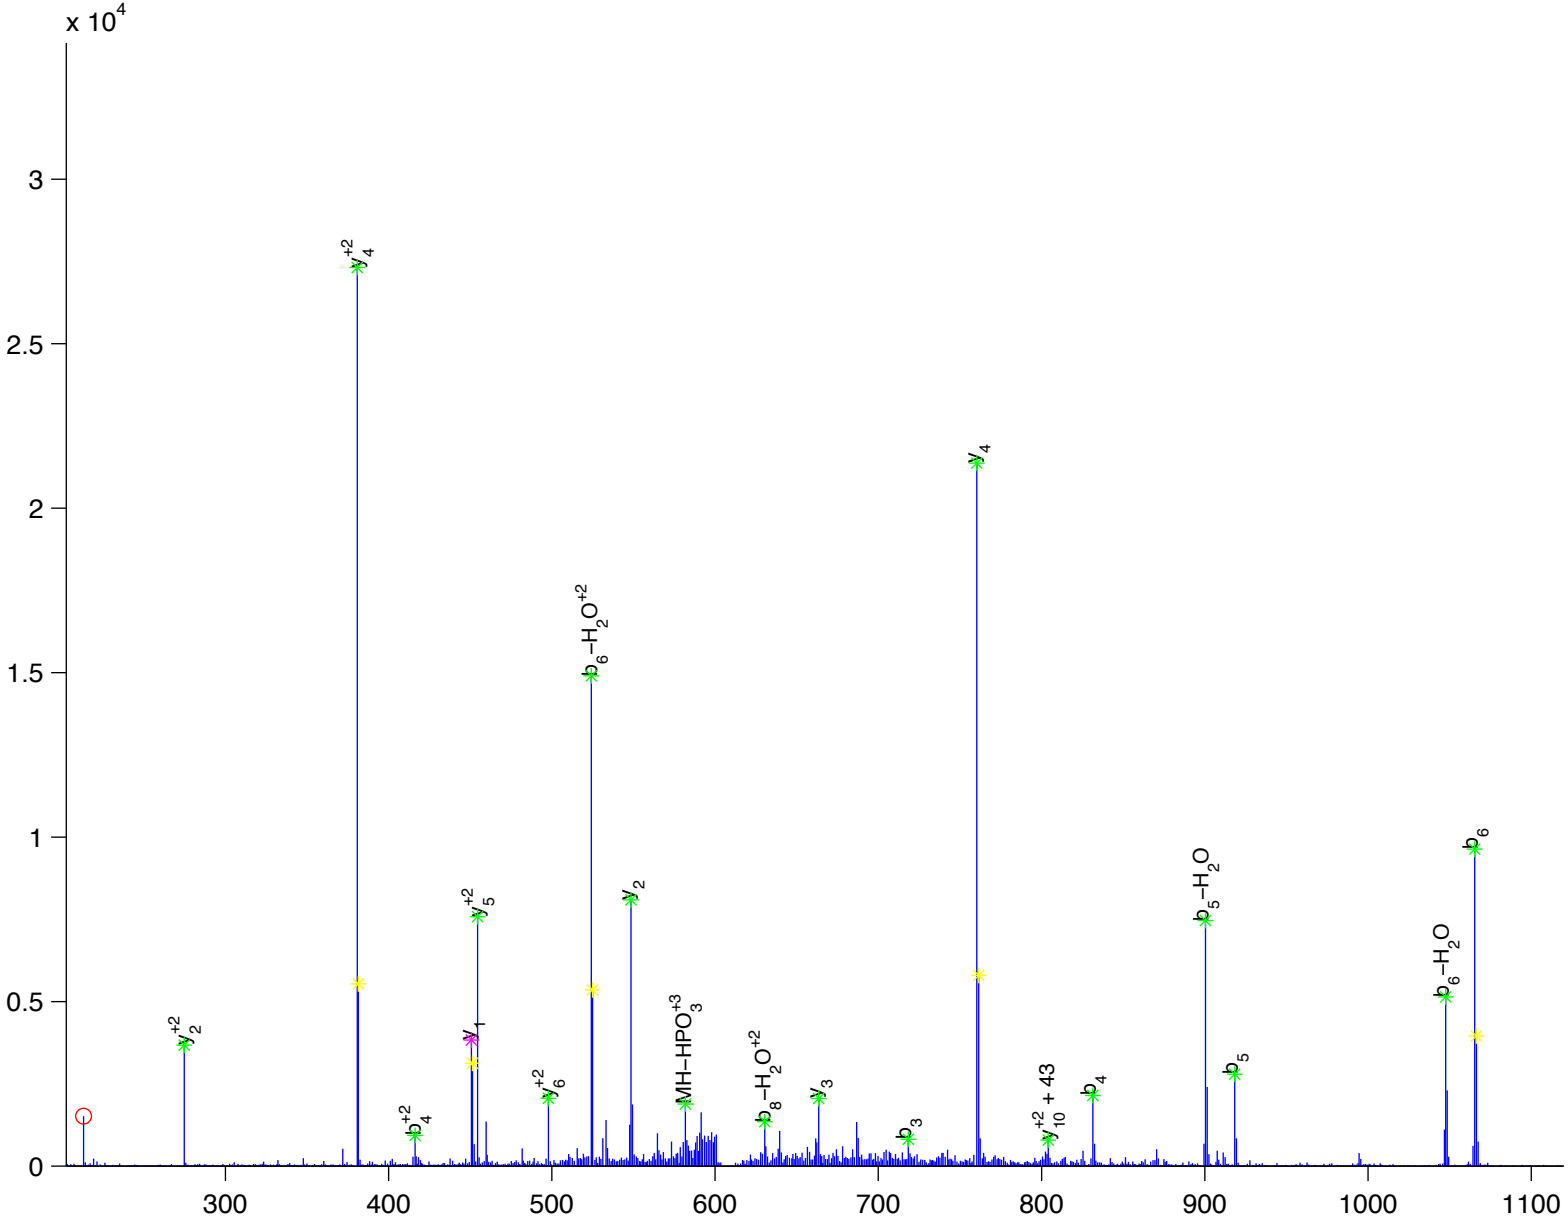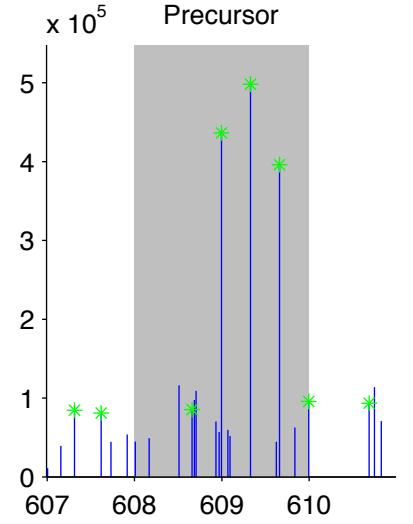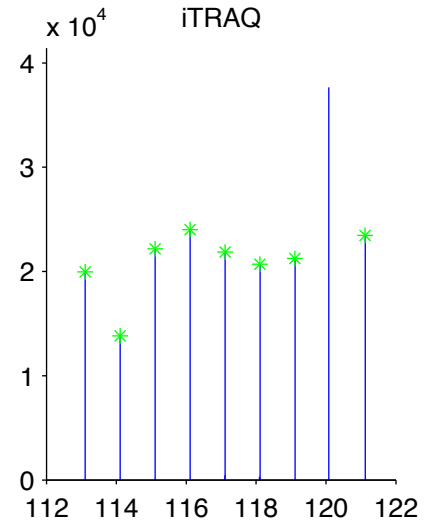

T  
[R] y [E] [Q] [L] [P] R  
[ ] [ ] [ ] [ ] [ ] [ ]

tight junction protein 1

Charge State: +3

Scan Number: 3660

File Name: 091130ptp1blivers\_hfd\_basal2.raw

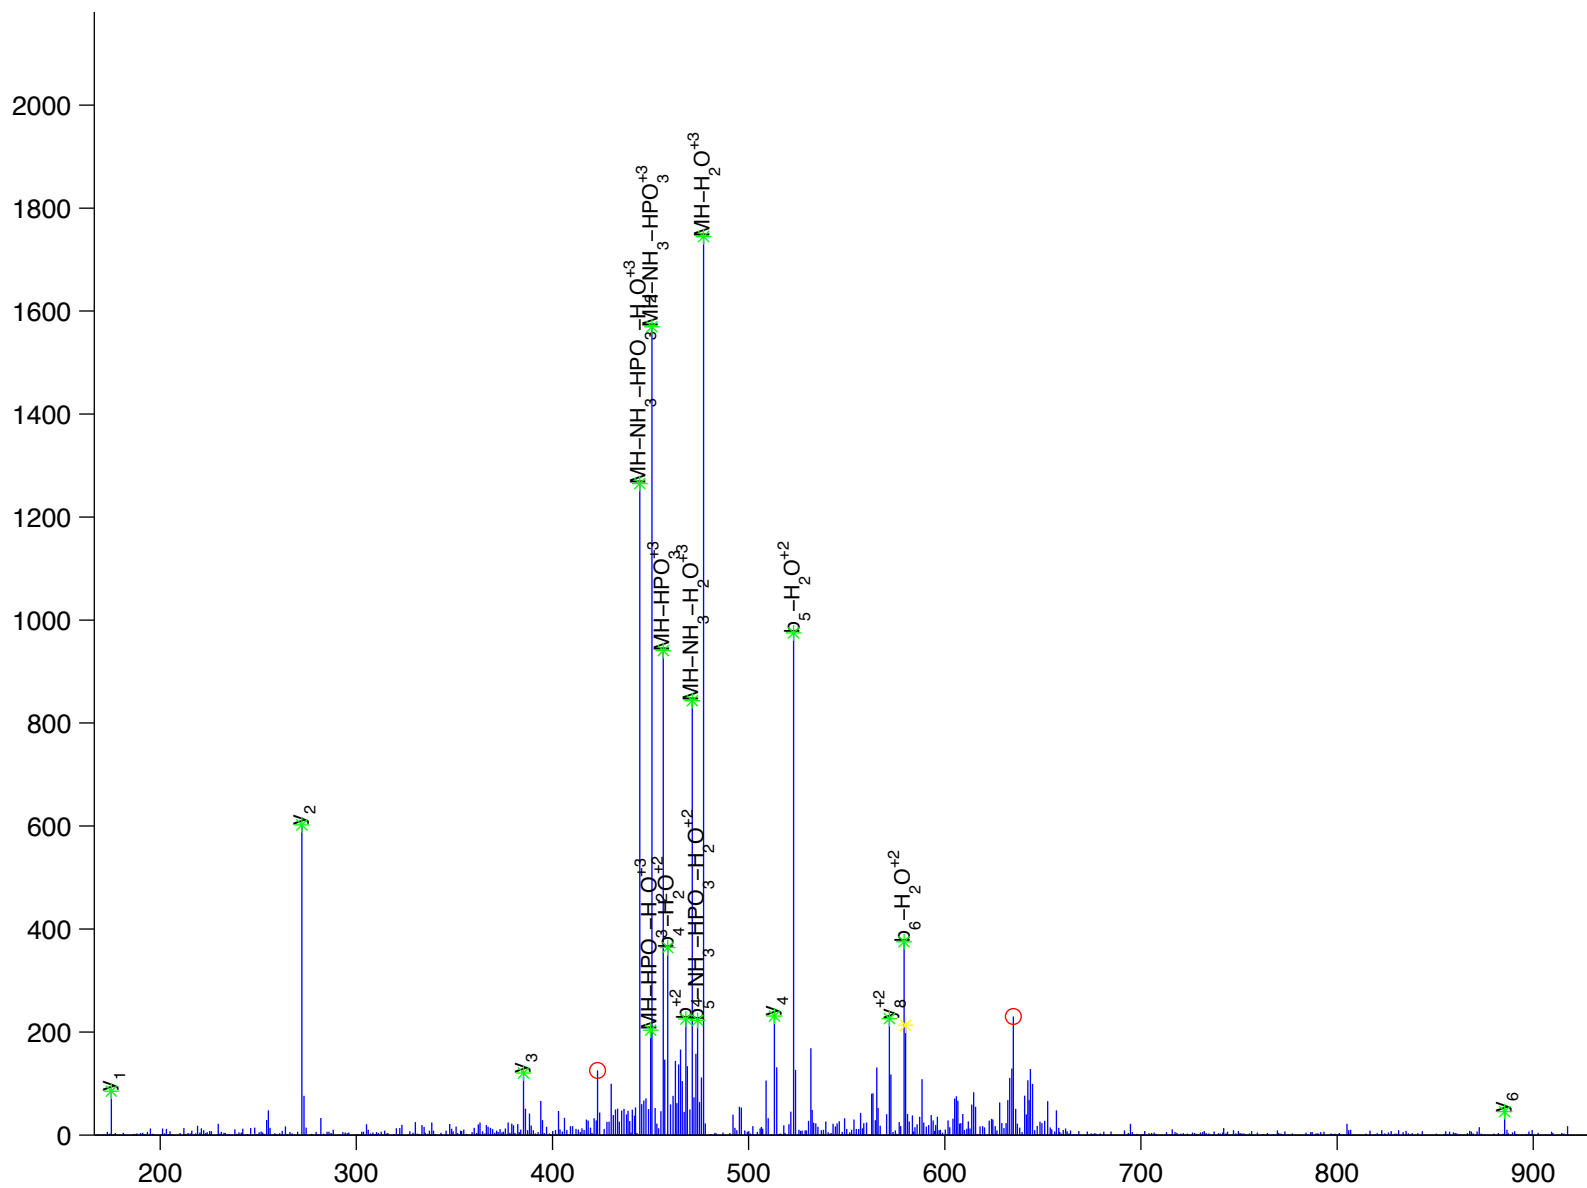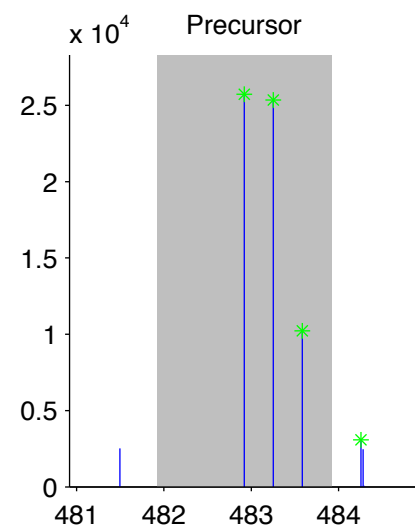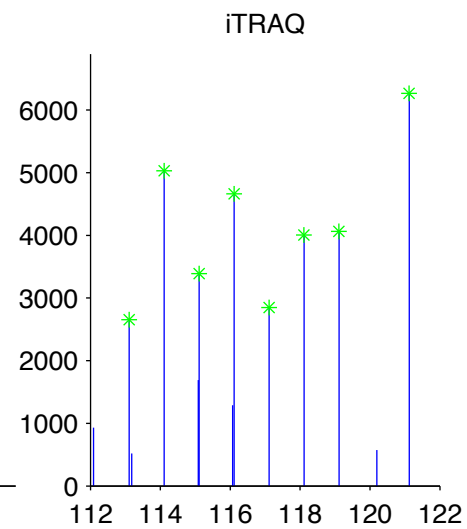

Q [ y ] F [ D ] Q [ Y ] P [ R ]

tight junction protein 1

Charge State: +2

Scan Number: 4447

File Name: 090806ptp1blivers\_M\_NC2.raw

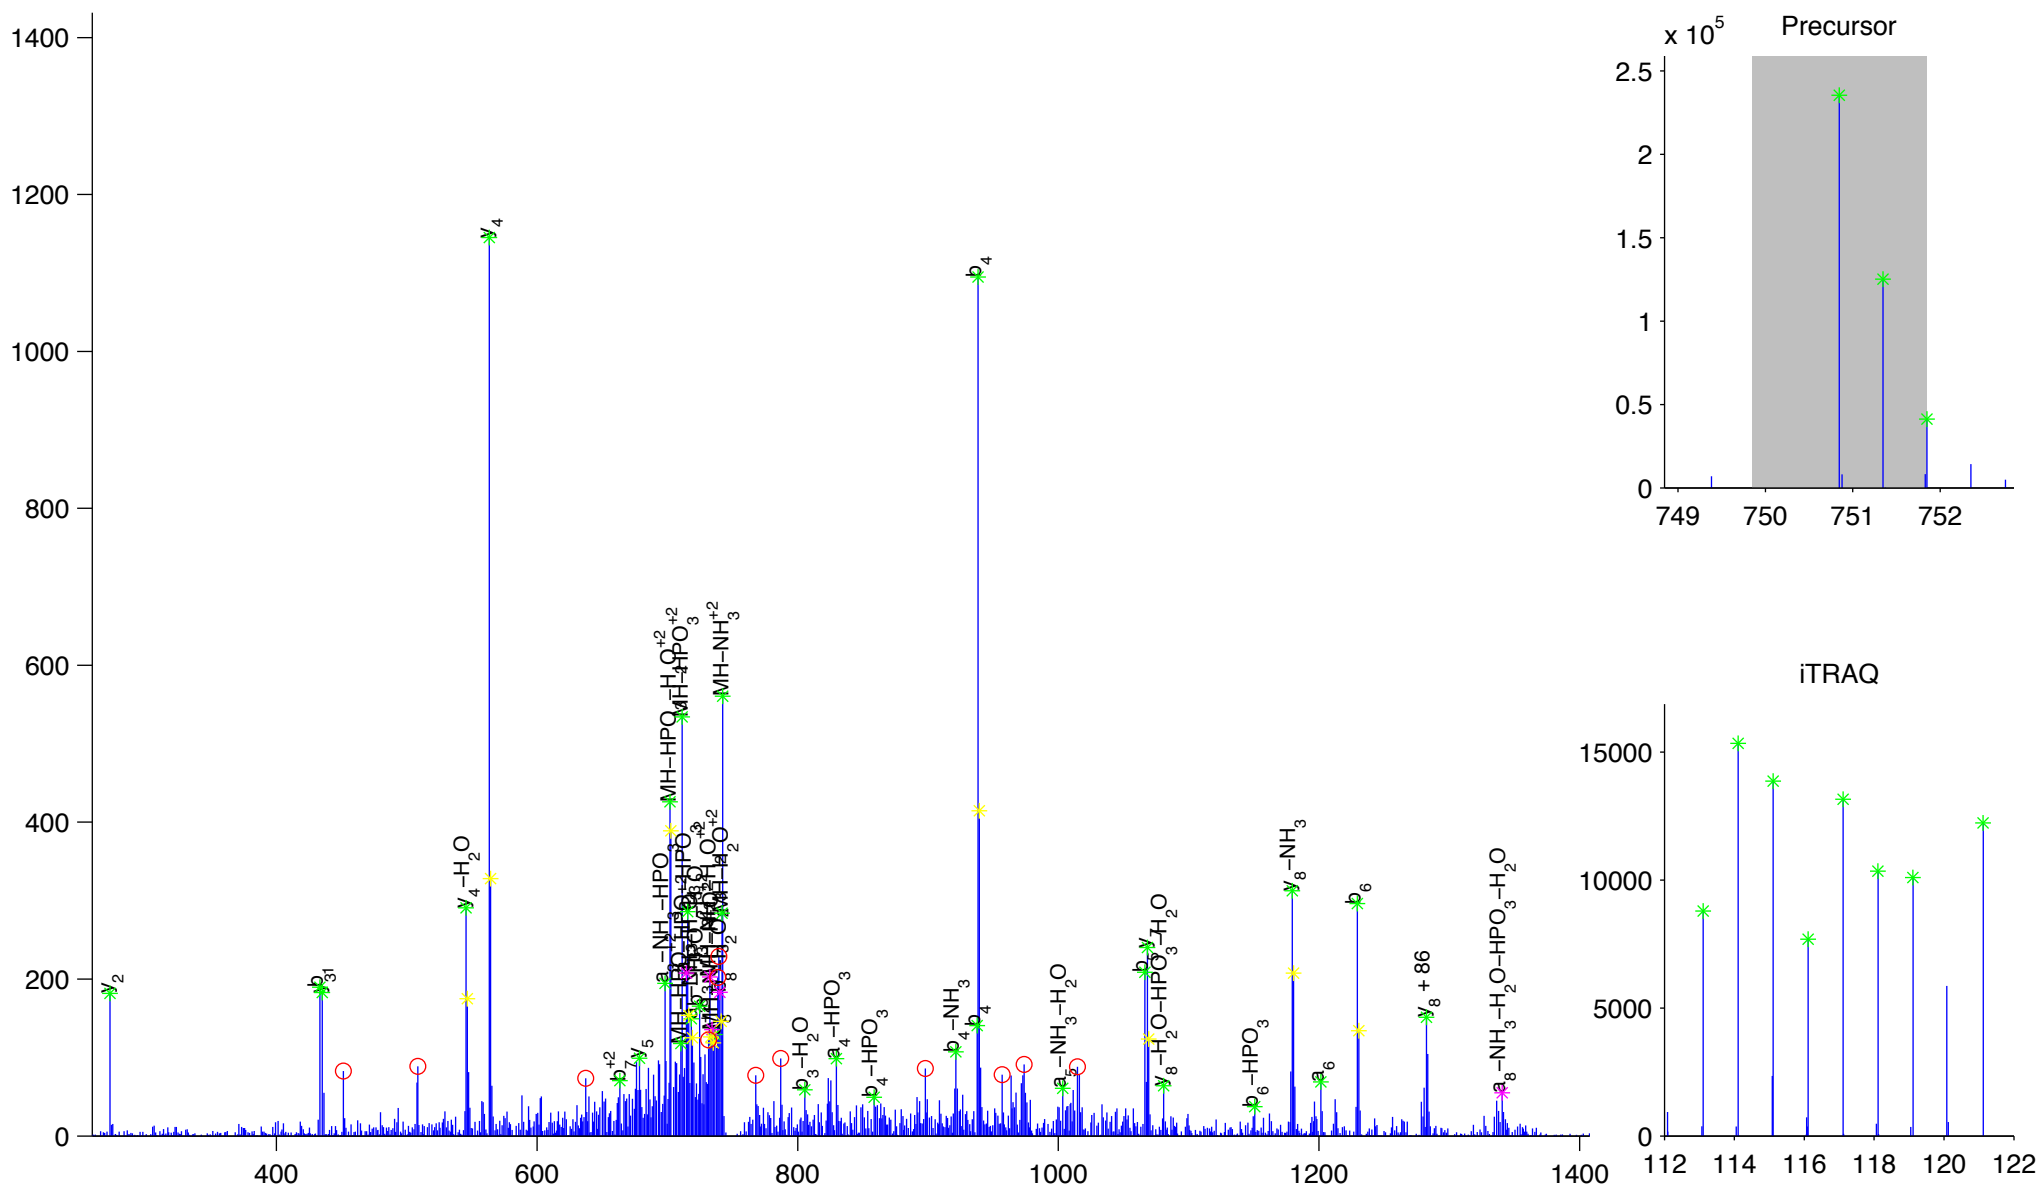

Q [ L [ S [ y [ F [ D [ R [ R [ ] ] ] ] ] ] ] ]

tight junction protein 1

Charge State: +3

Scan Number: 4741

File Name: 091130ptp1blivers\_hfd\_basal2.raw

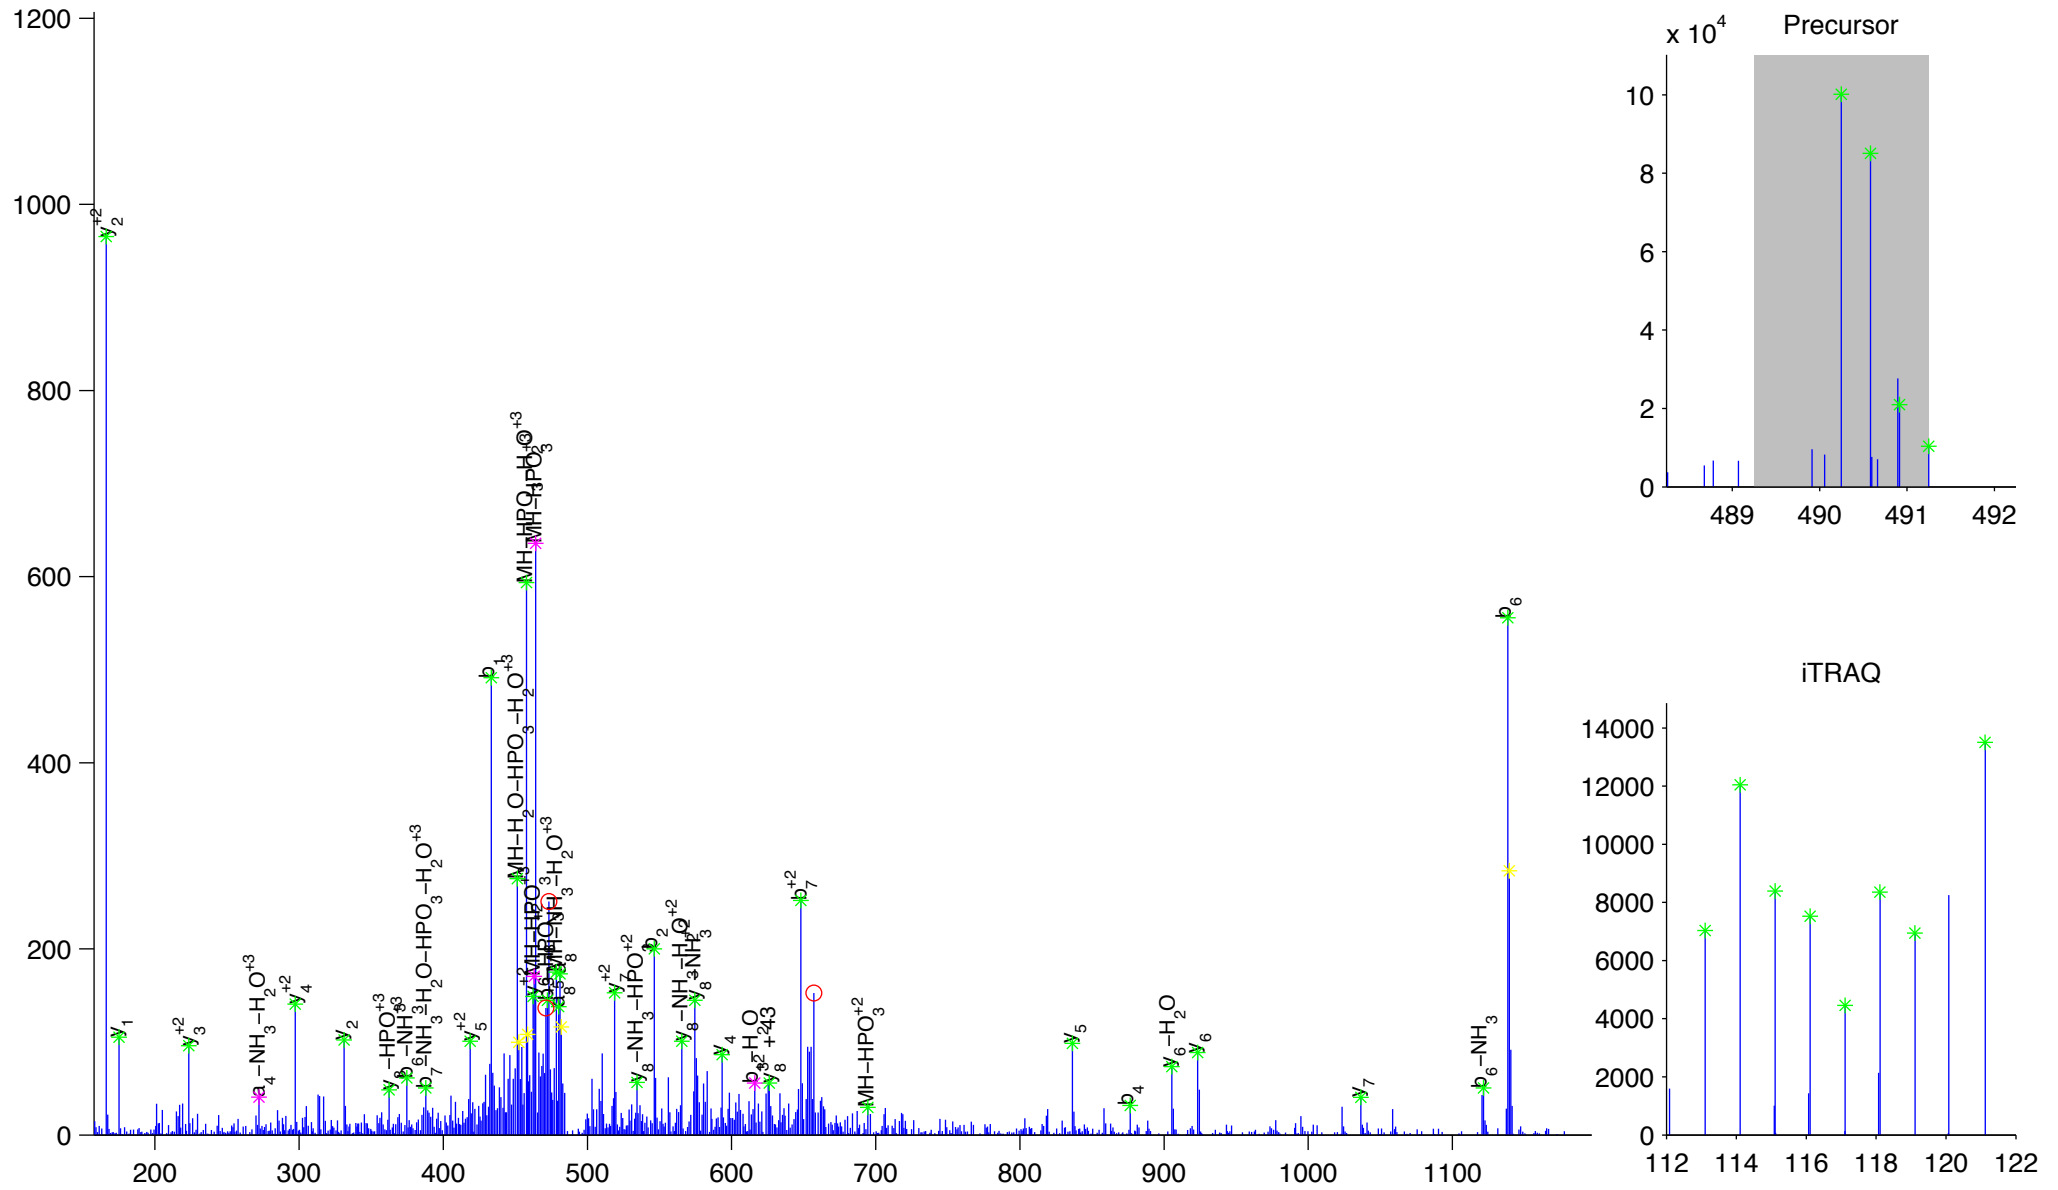

Y [ E ] V [ S ] S [ y ] T [ D ] Q [ F ] S [ R ]

tight junction protein 1

Charge State: +2

Scan Number: 6615

File Name: 090807ptp1blivers\_M\_HFD\_basal.raw

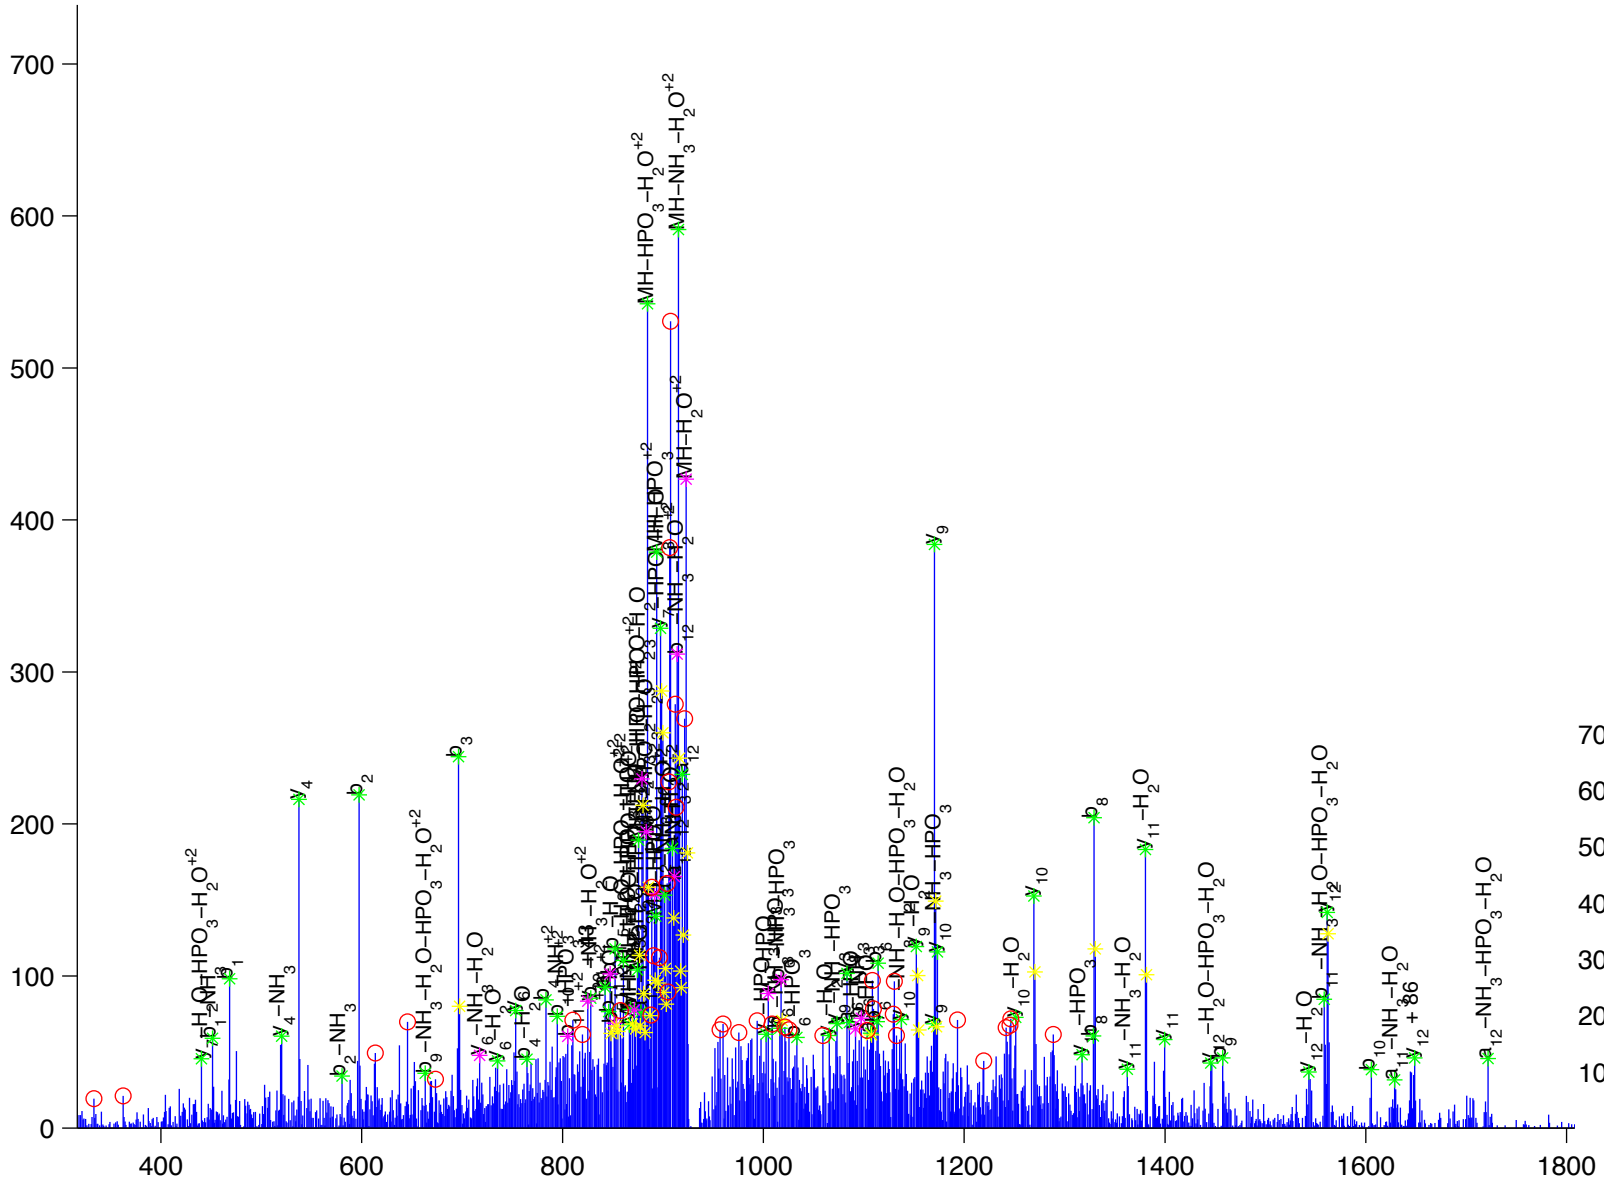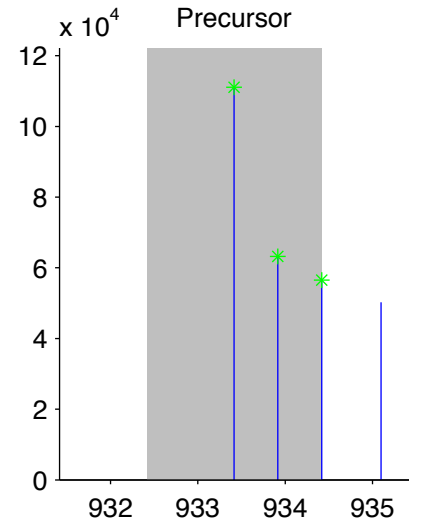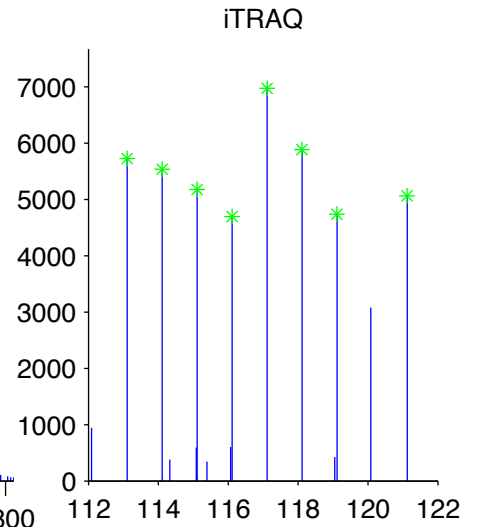



S [ E ] G [ T ] y [ C ] C [ G ] P [ V ] S [ V ] R

transglutaminase 2, C polypeptide

Charge State: +2

Scan Number: 4248

File Name: 091130ptp1blivers\_hfd\_basal2.raw

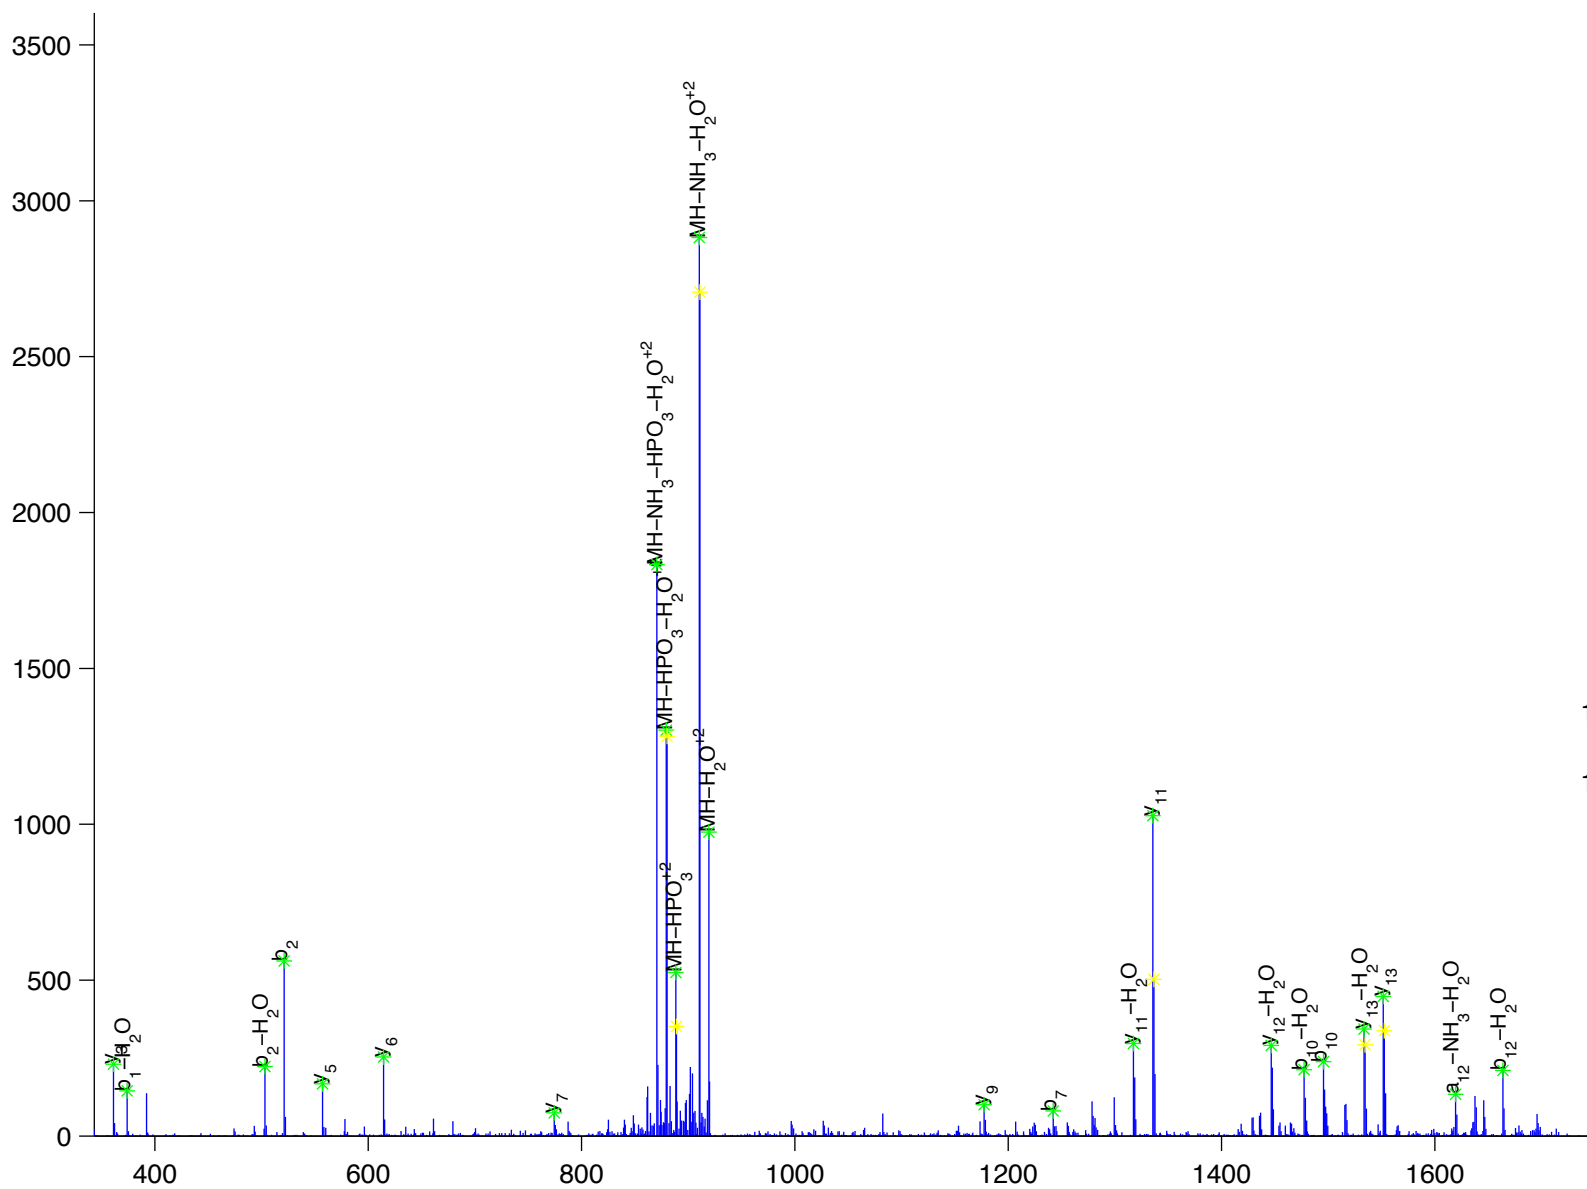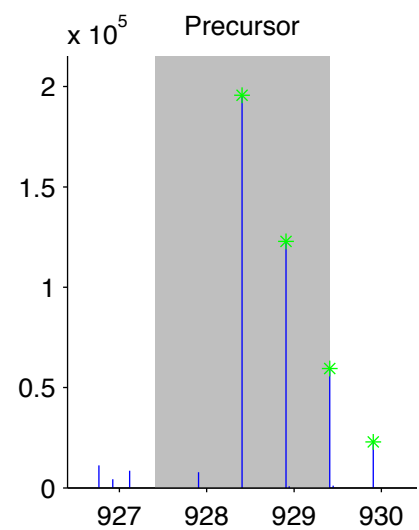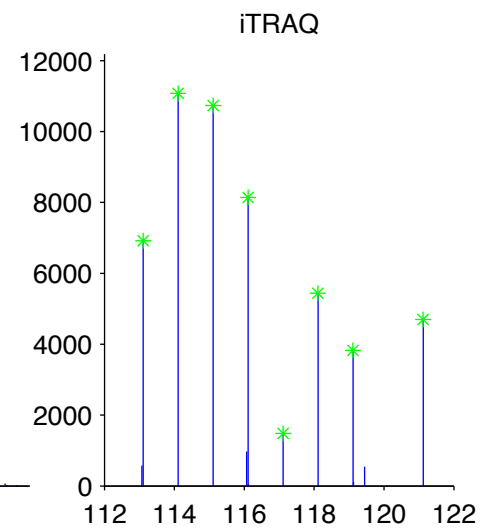





y I E A C A R

UDP-glucose dehydrogenase

Charge State: +2

Scan Number: 4105

File Name: 091130ptp1blivers\_hfd\_basal2.raw

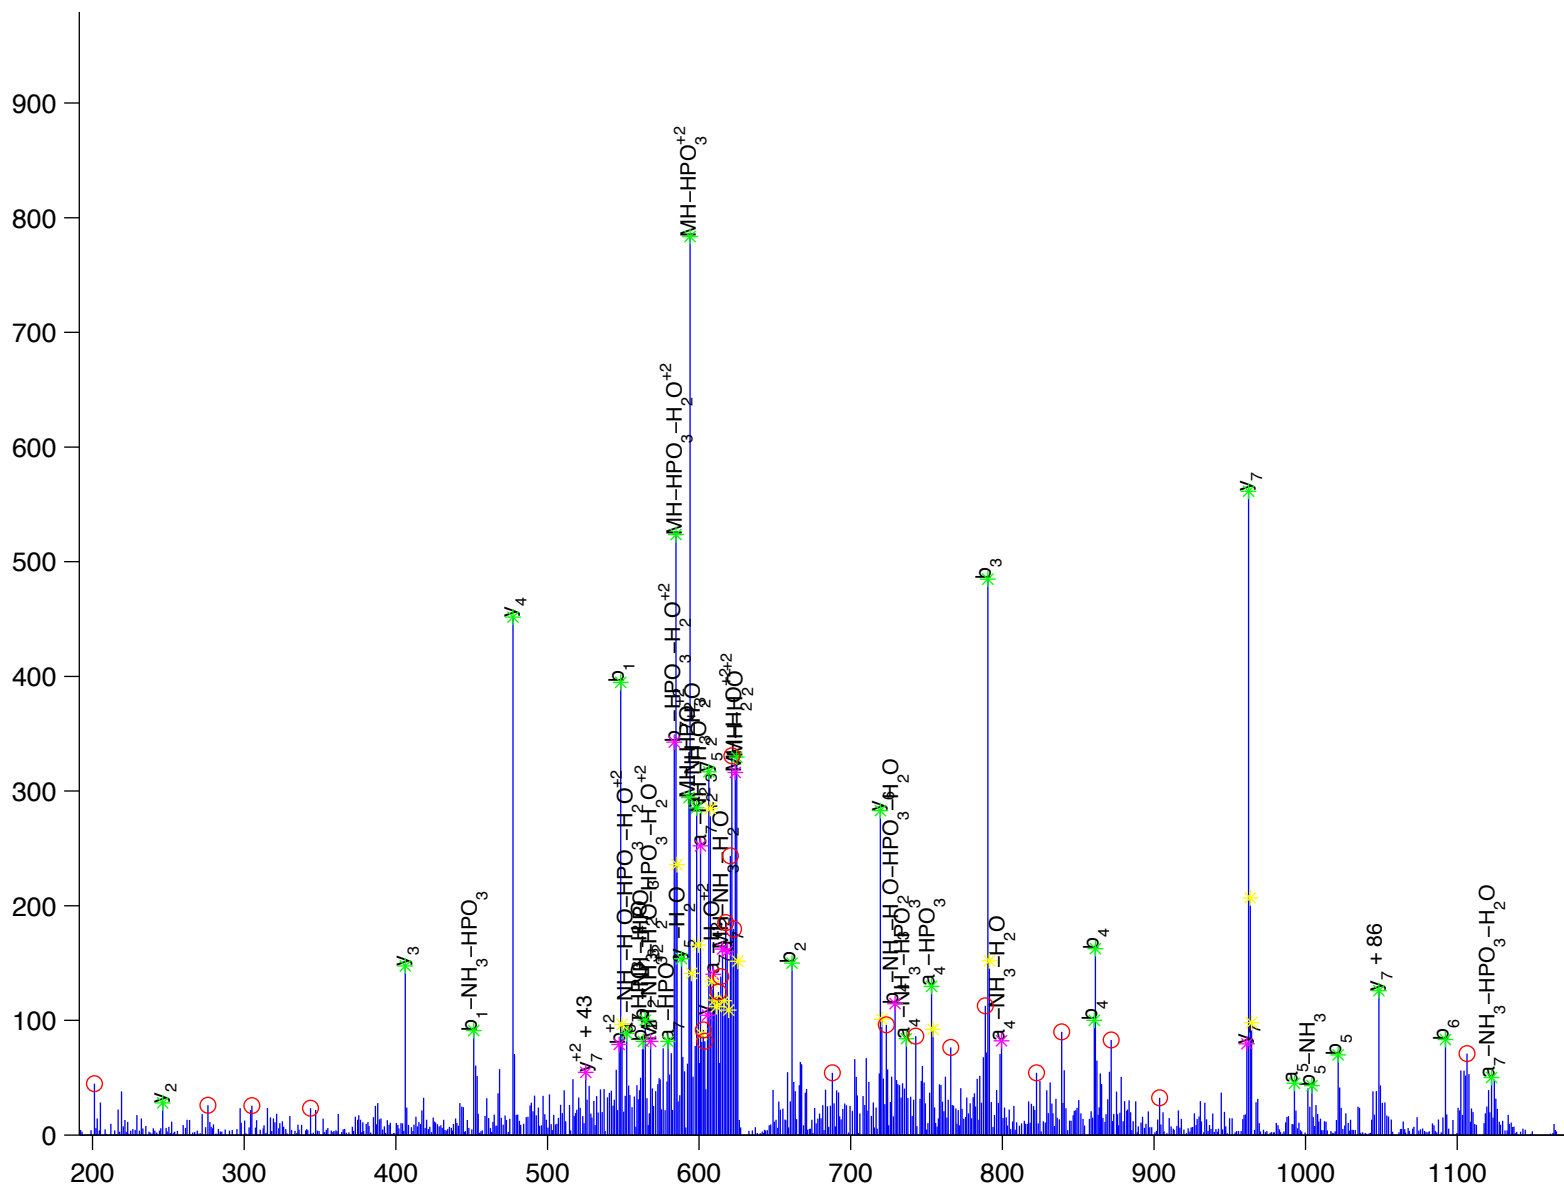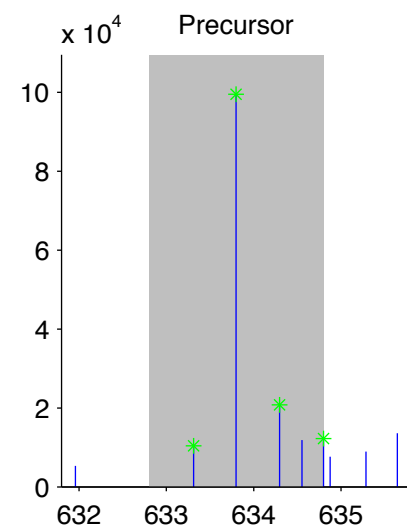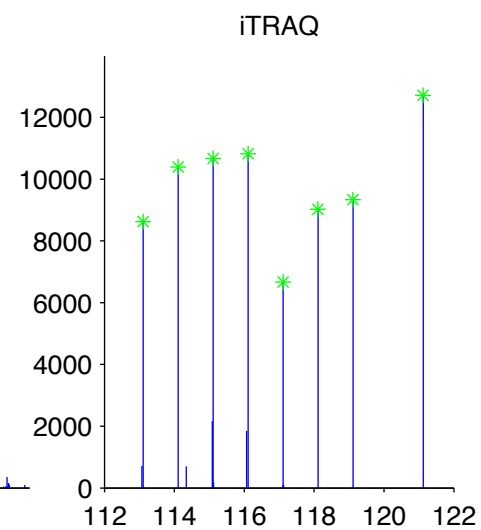

G[E]y[S]P[S]V[Q]K

urate oxidase

Charge State: +3

Scan Number: 3868

File Name: 091130ptp1blivers\_hfd\_basal2.raw

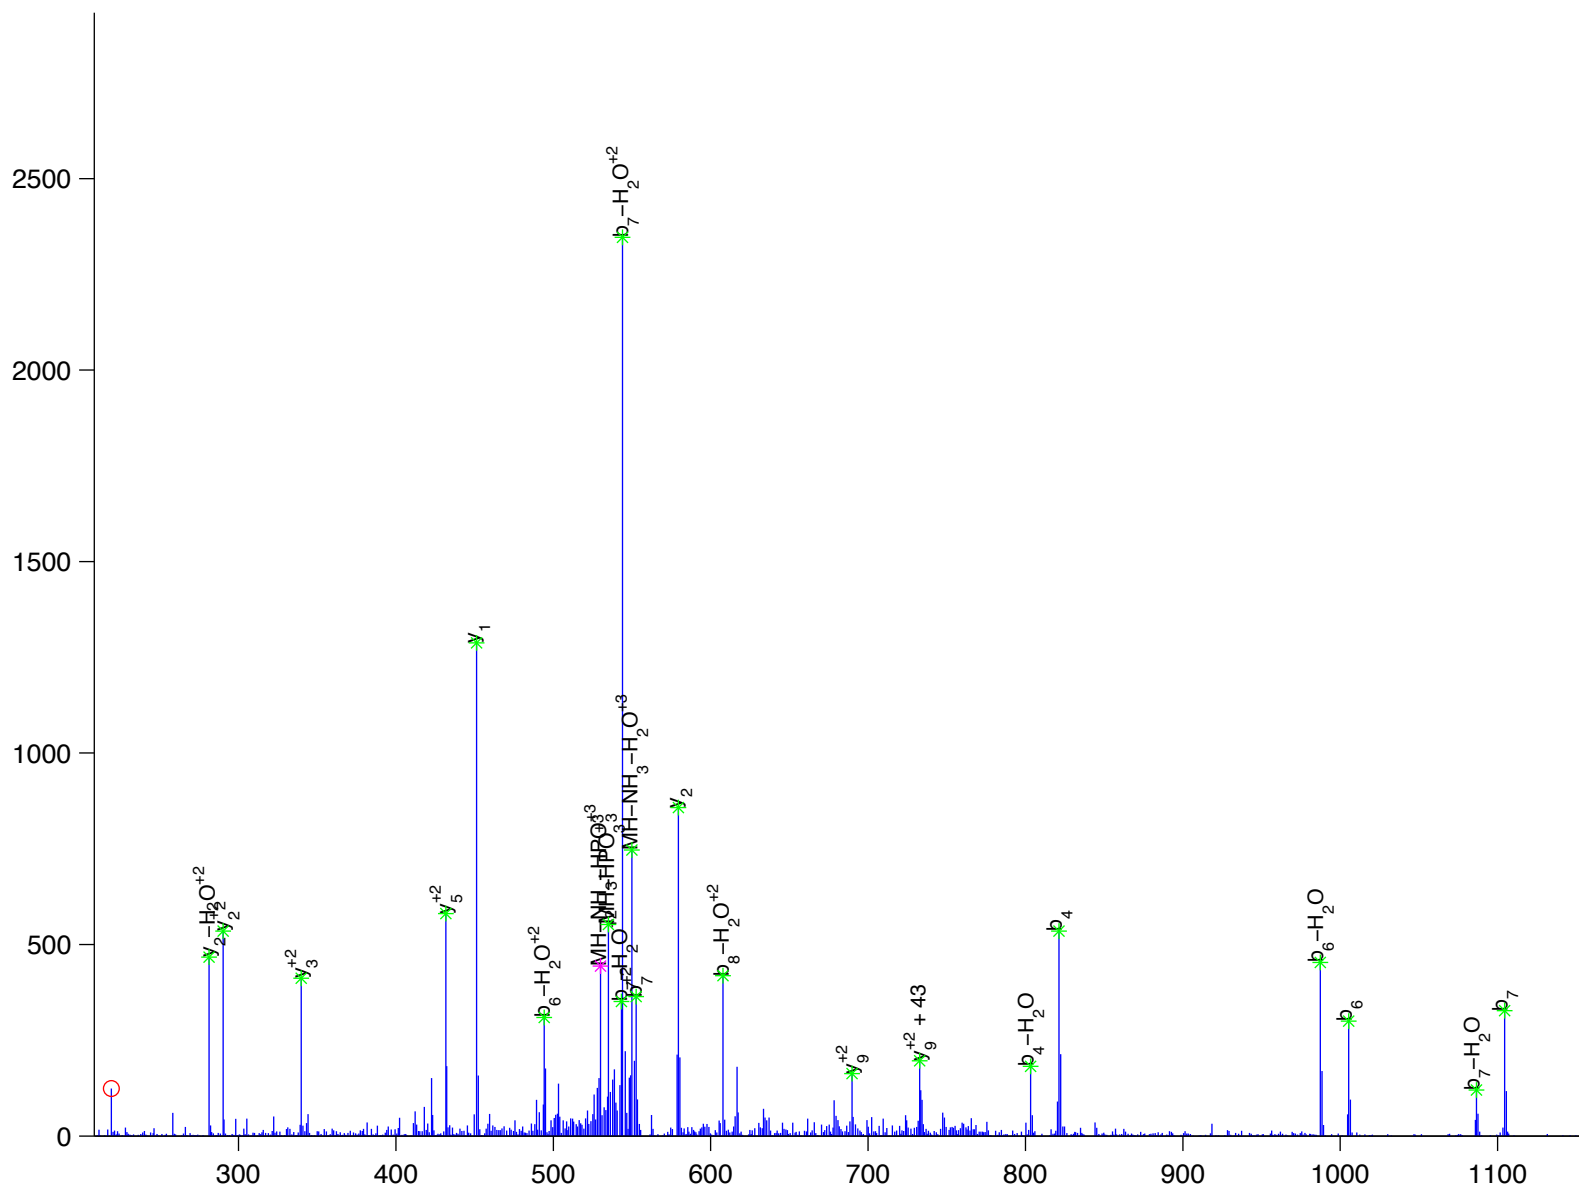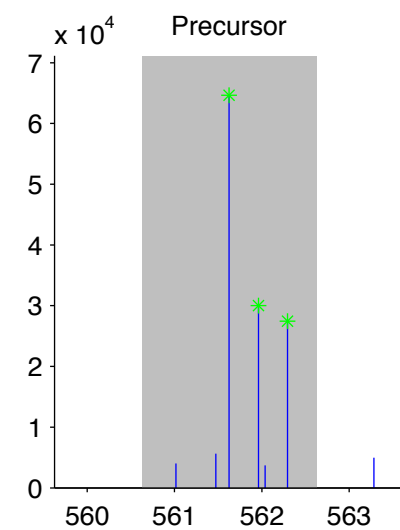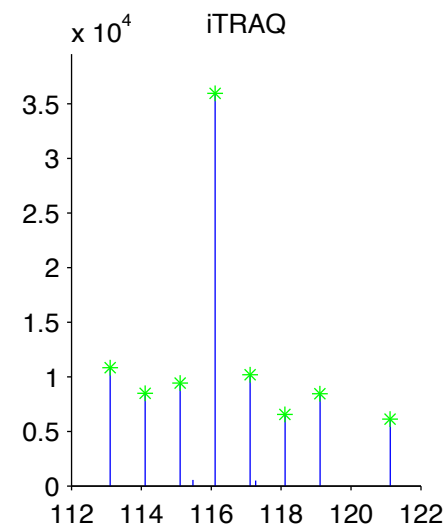

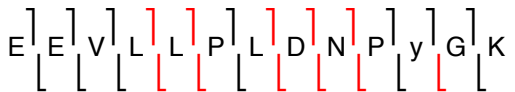

urate oxidase

Charge State: +3

Scan Number: 5875

File Name: 100905ptp1blivers\_ncHFD\_basal.raw

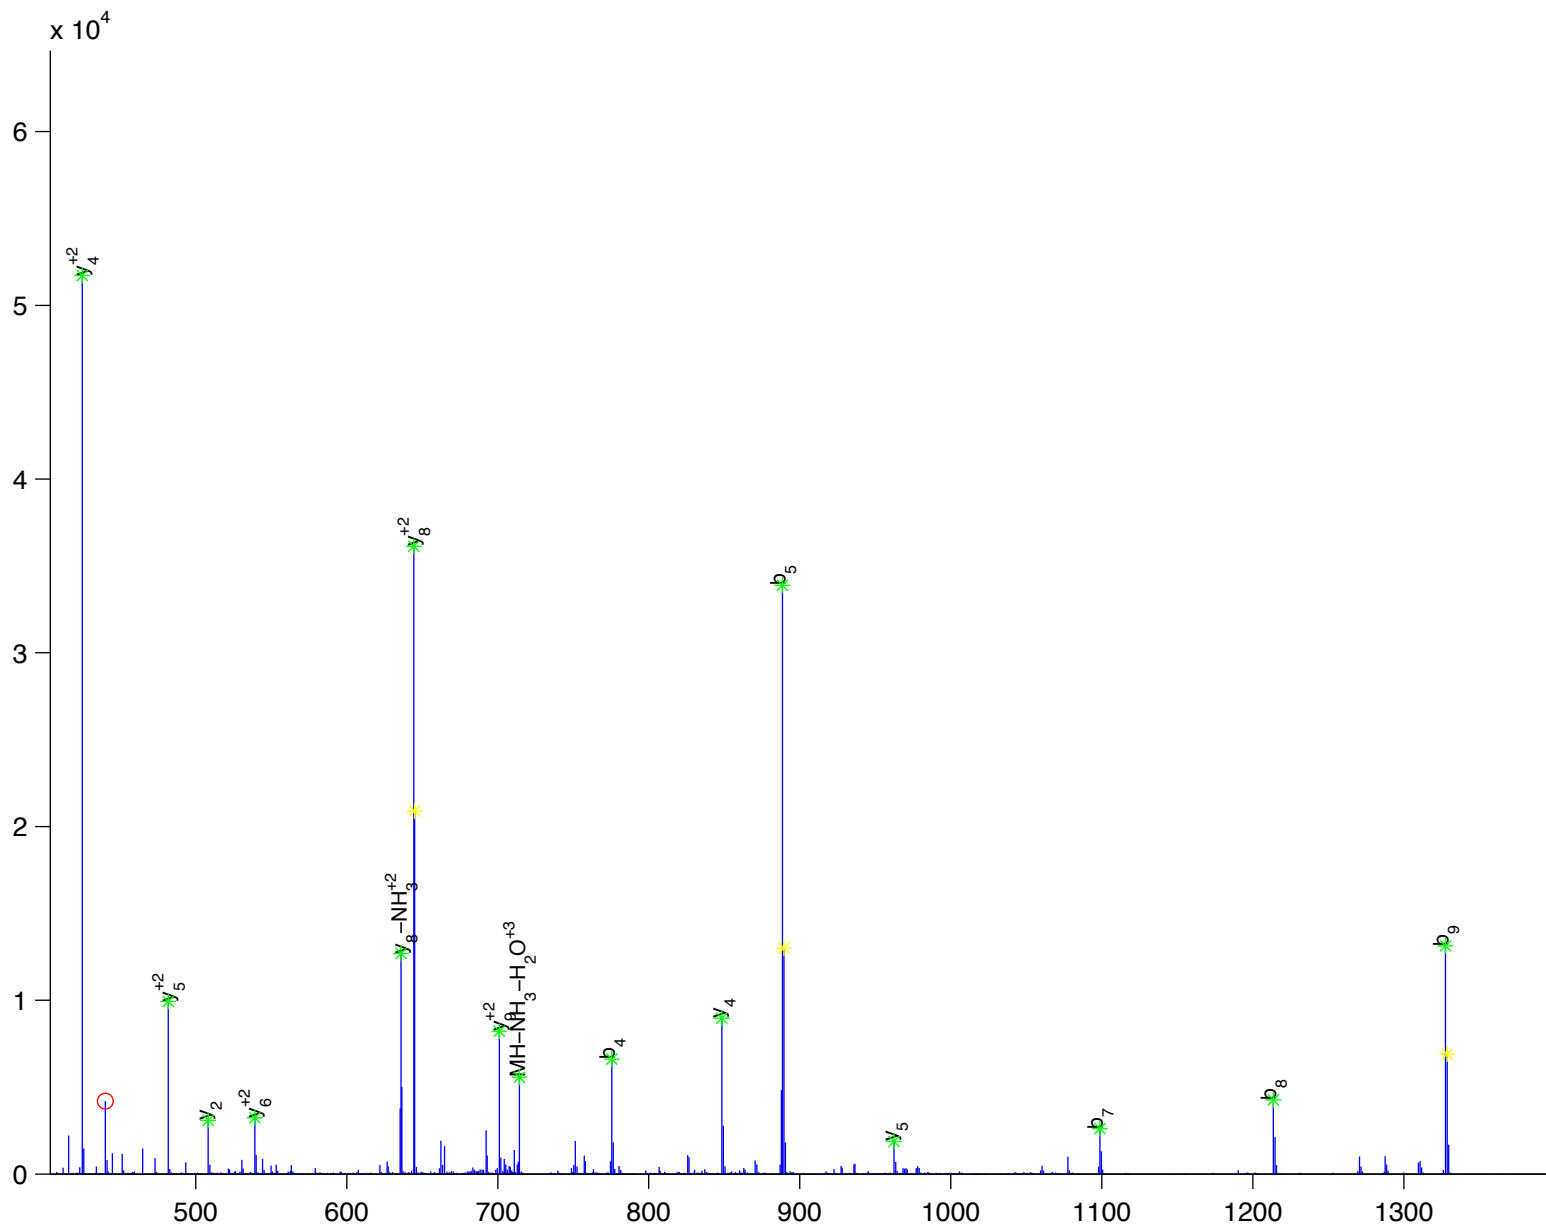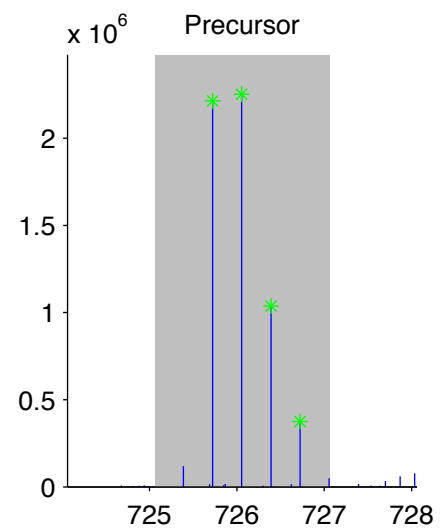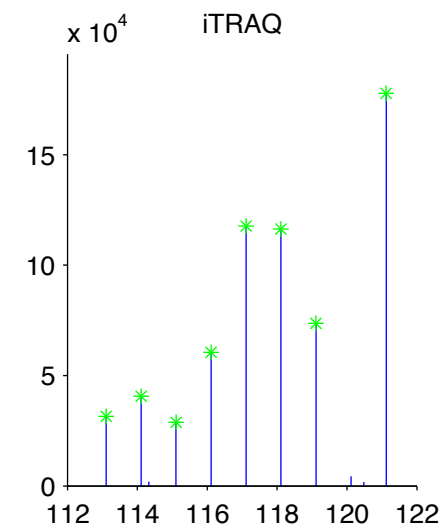

M[G]L[I]N[K]E[E]V[L]L[P]L[D]N[P]y[G]K

urate oxidase

Charge State: +4

Scan Number: 8735

File Name: 090806ptp1blivers\_M\_NC2.raw

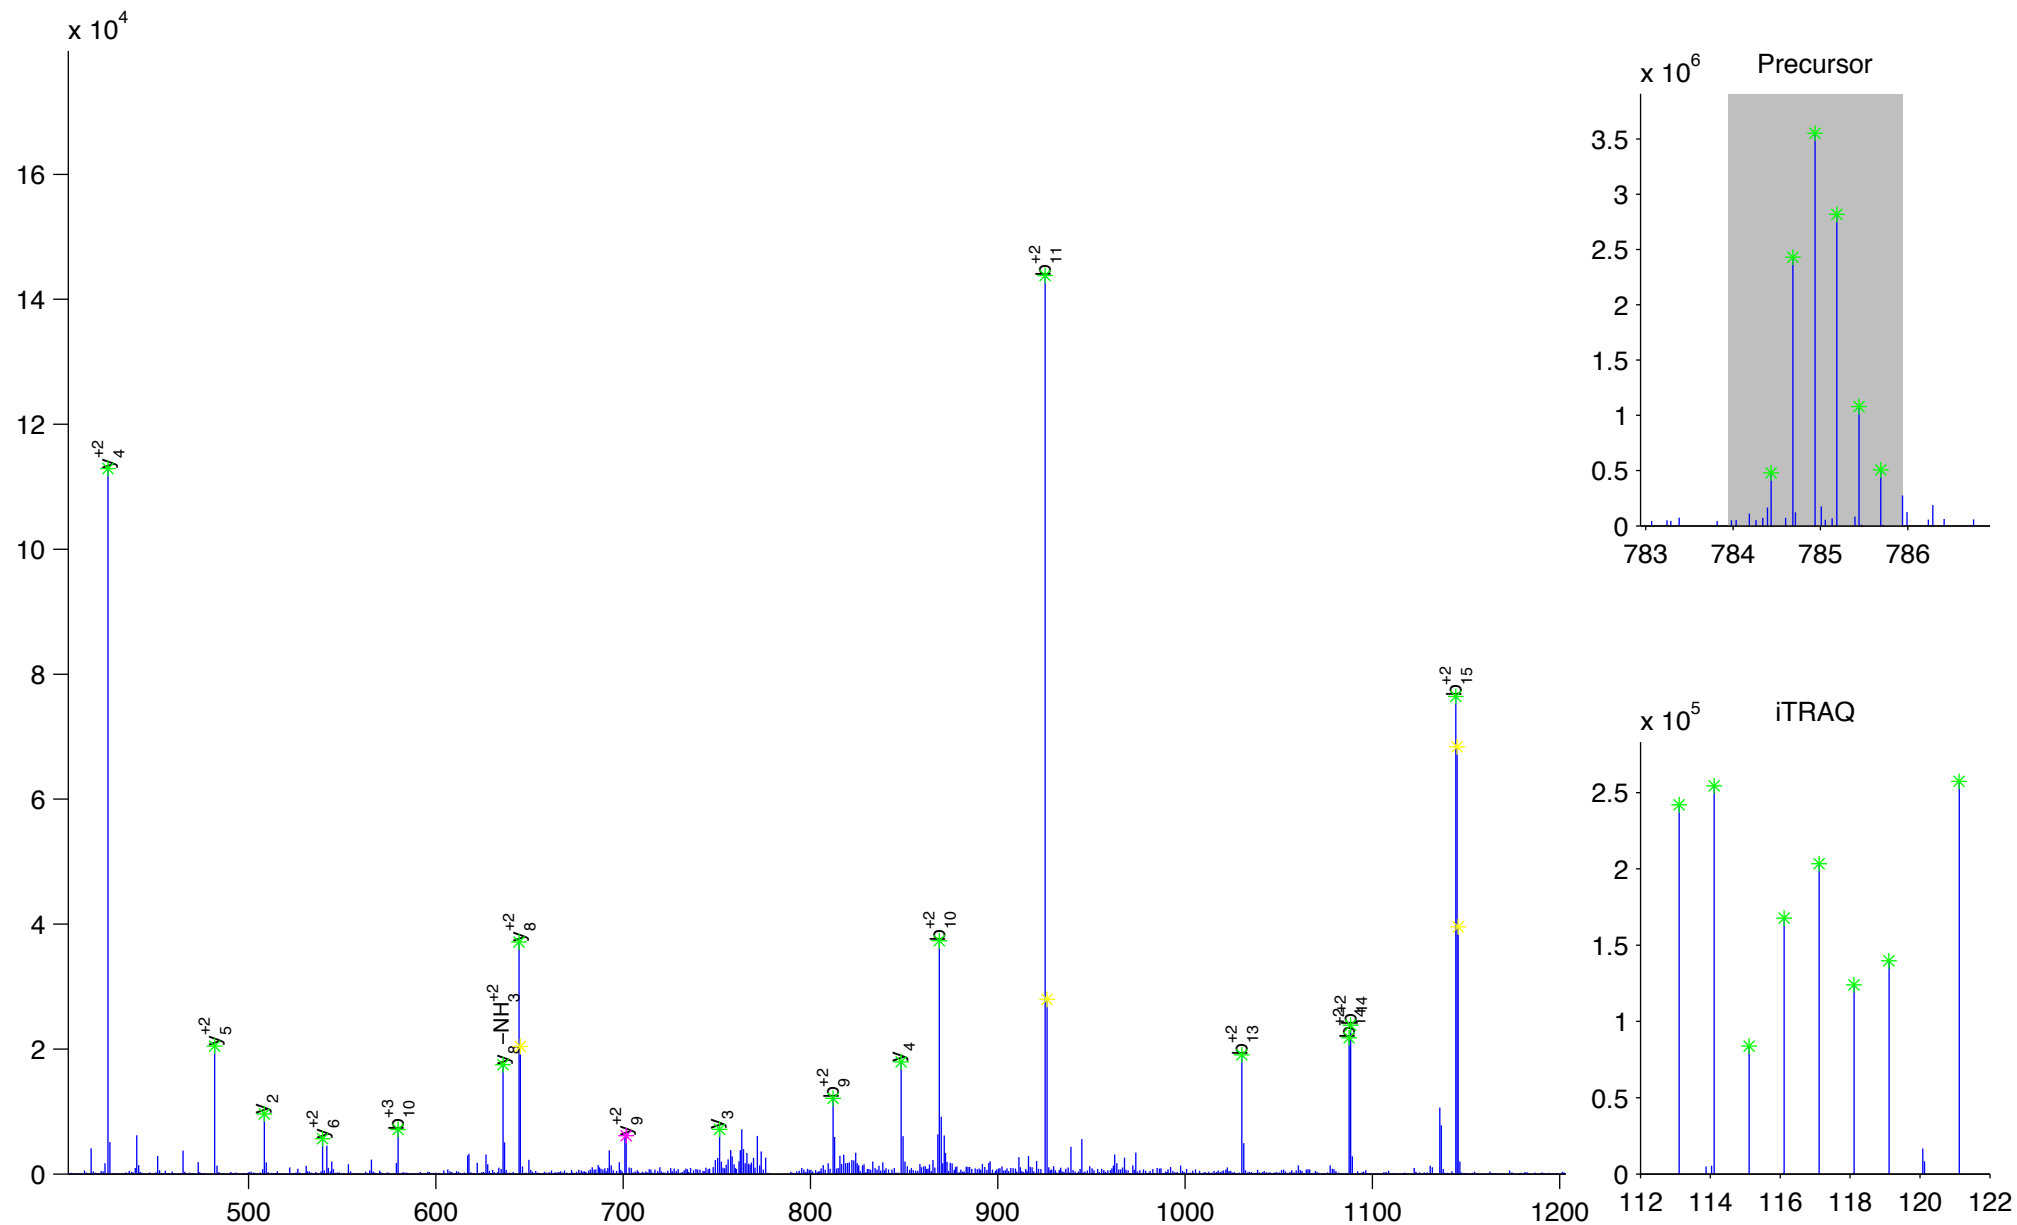

L [ M ] T [ G ] D [ T ] y [ T ] A [ H ] A [ G ] A [ K ]

v-abl Abelson murine leukemia oncogene 1

Charge State: +3

Scan Number: 4374

File Name: 091130ptp1blivers\_hfd\_basal2.raw

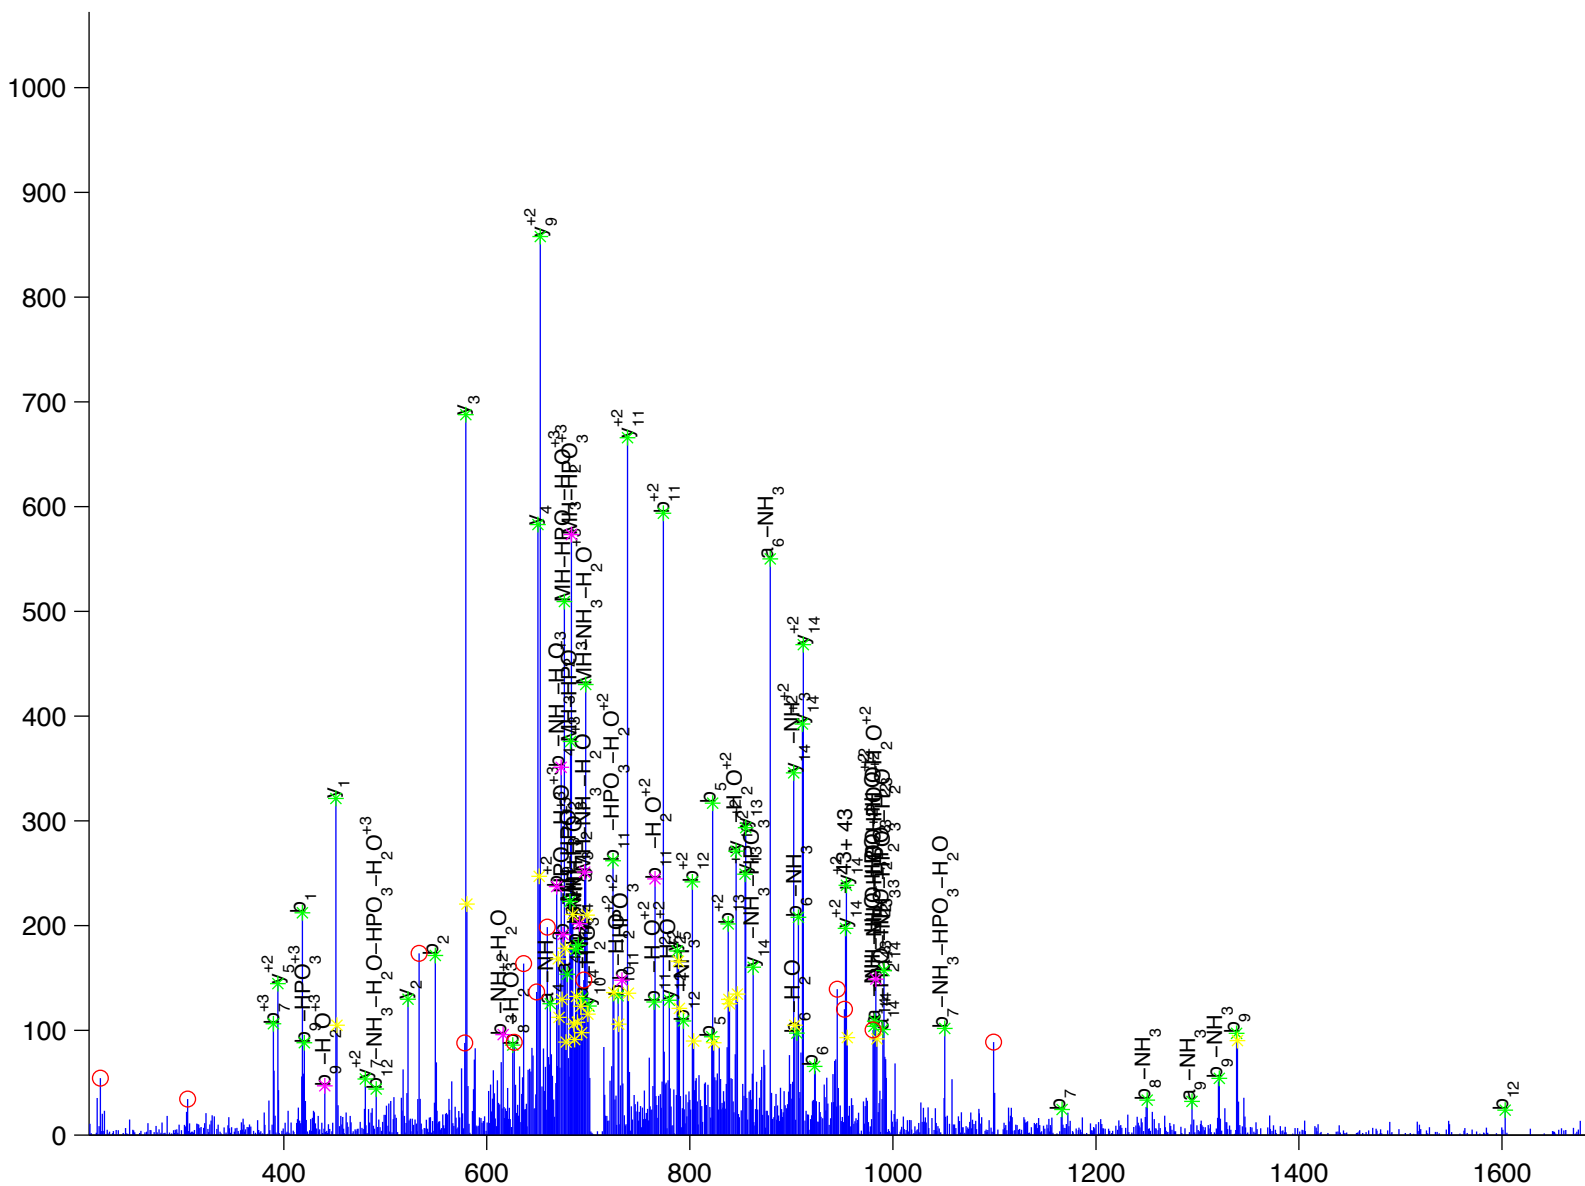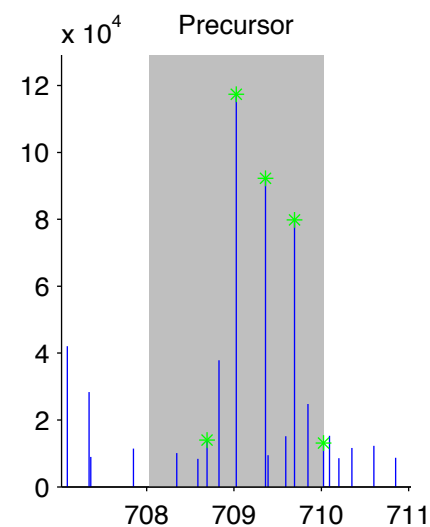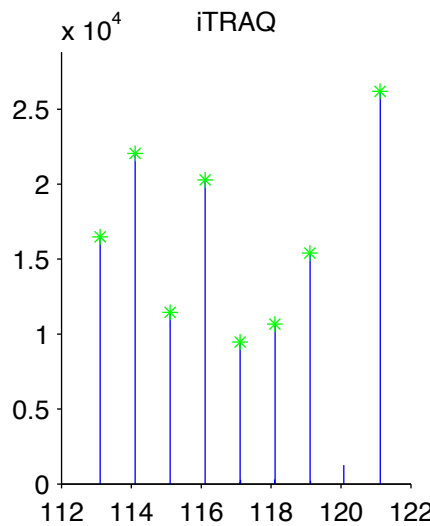

V [ P ] N [ A ] y [ D ] K [ T ] A [ L ] A [ L ] E [ V ] G [ E ] L [ V ] K

v-crk sarcoma virus CT10 oncogene homolog

Charge State: +4

Scan Number: 8833

File Name: 090806ptp1blivers\_M\_NC2.raw

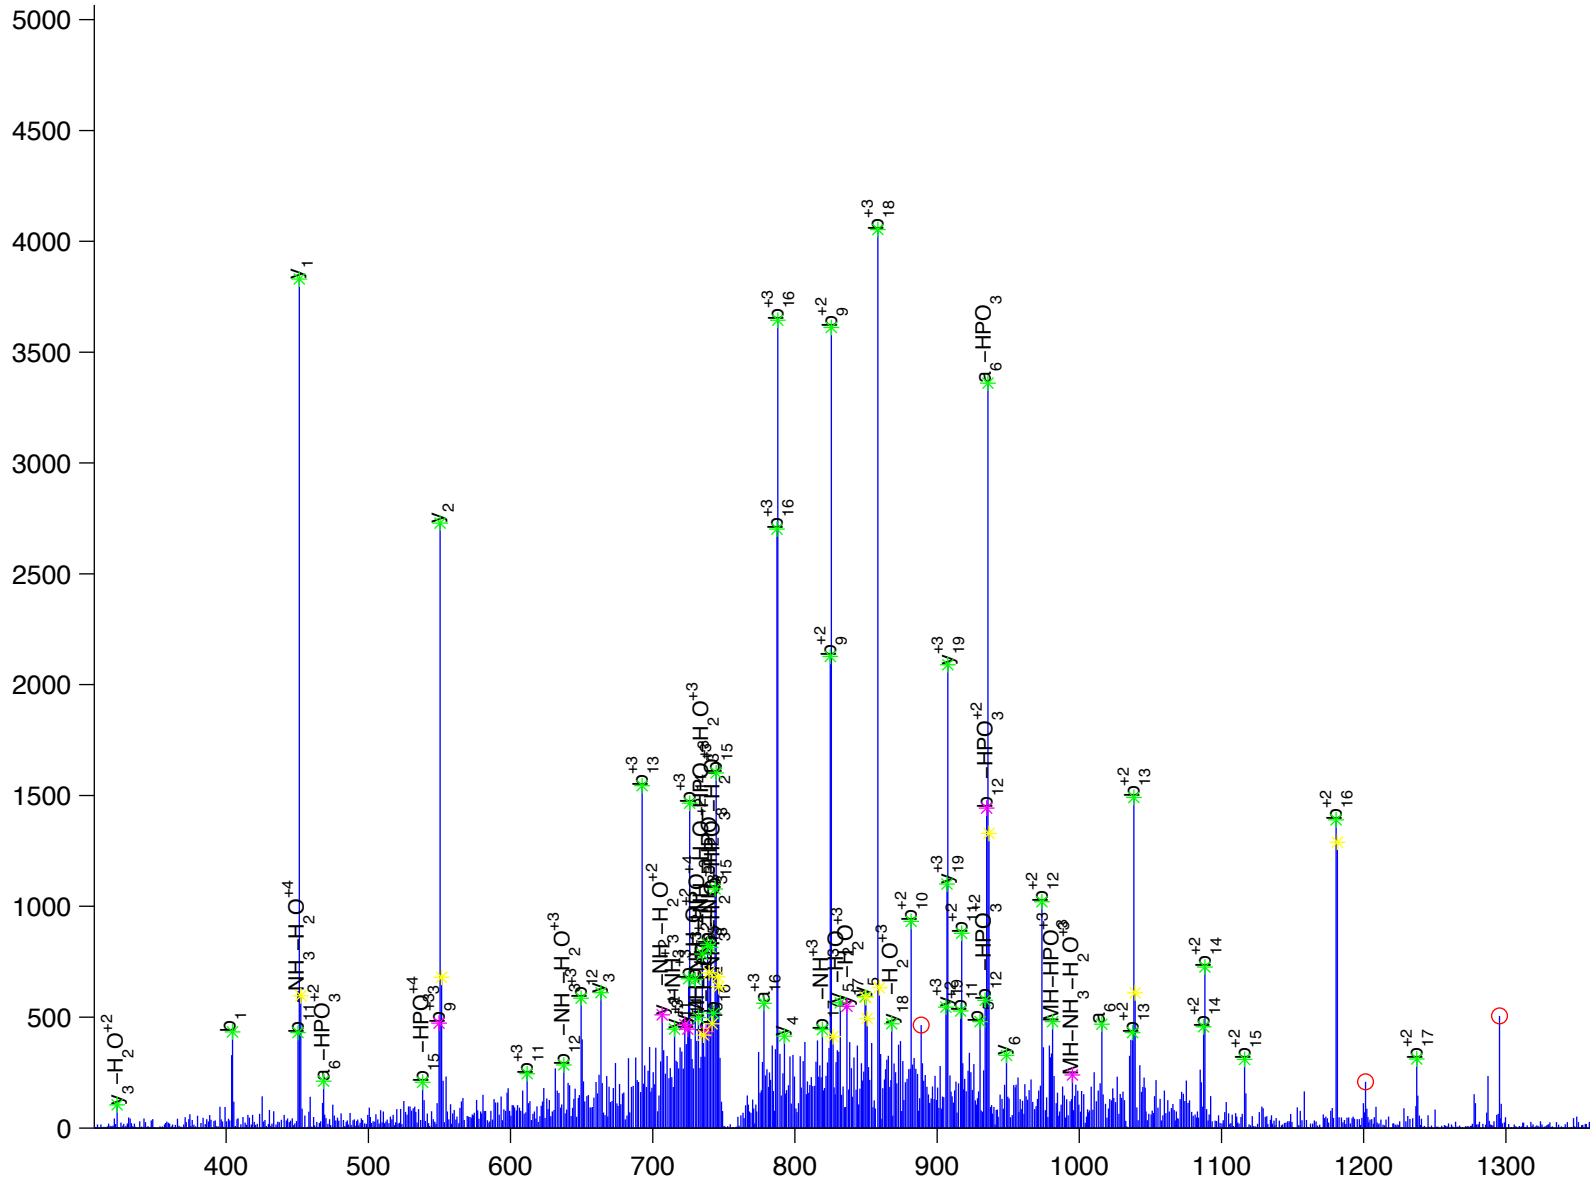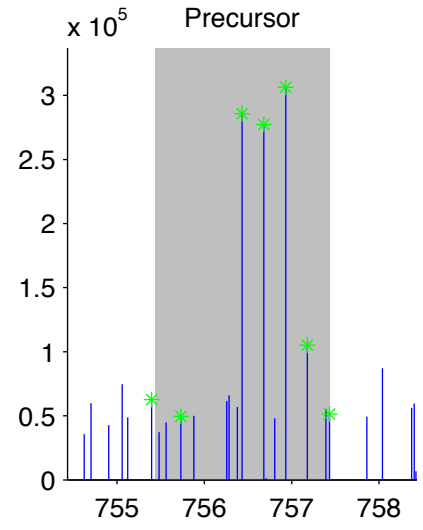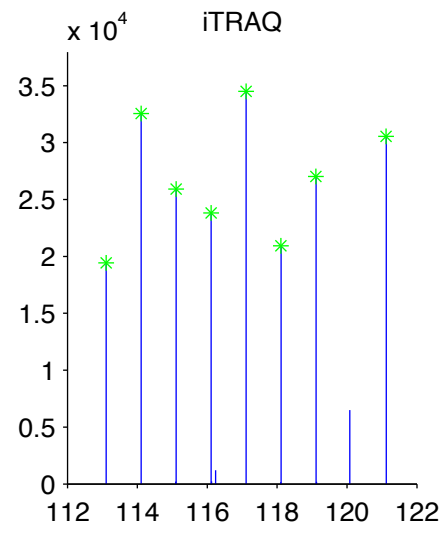

T L y D F P G N D A E D L P F K

v-crk sarcoma virus CT10 oncogene homolog (avian)-like

Charge State: +4

Scan Number: 6108

File Name: 100905ptp1blivers\_ncHFD\_basal.raw

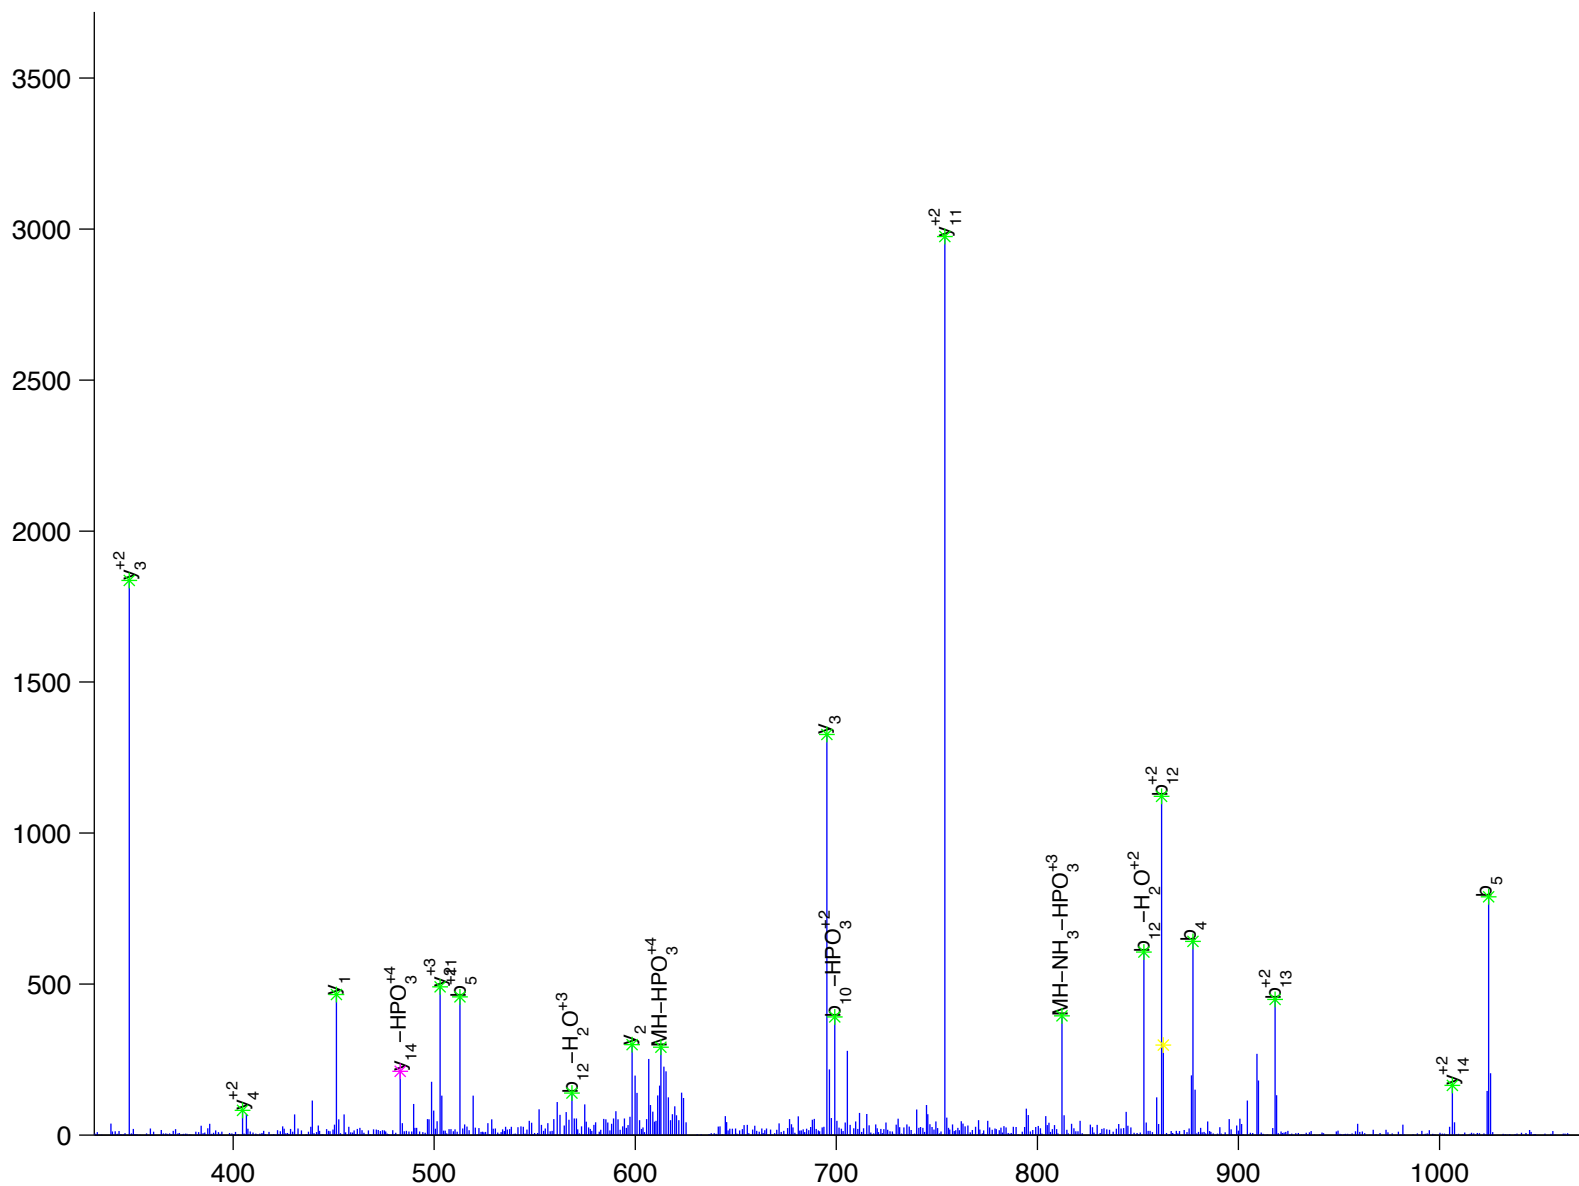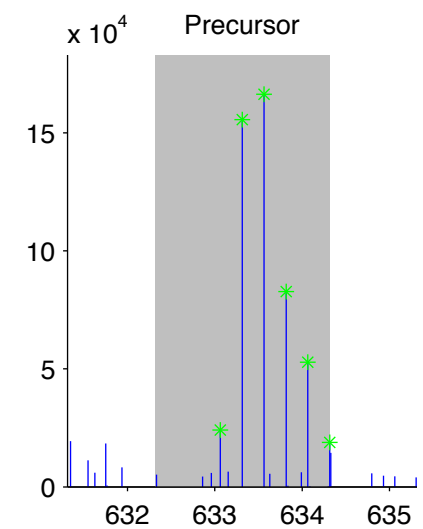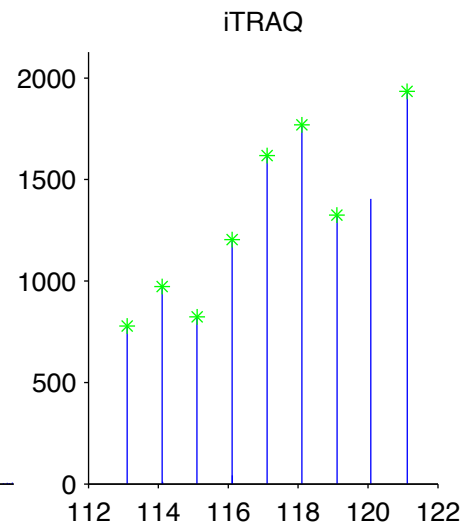



N[S]N[S]y[G]I[P]E[P]A[H]A[Y]A[Q]P[Q]T[T]T[P]L[P]T[V]A[S]T[P]G[A]A[I]N[P]L[P]S[T]Q[N]G[P]V[F]A[K]

v-crK sarcoma virus CT10 oncogene homolog (avian)-like

Charge State: +5

Scan Number: 7165

File Name: 091130ptp1blivers\_hfd\_basal2.raw

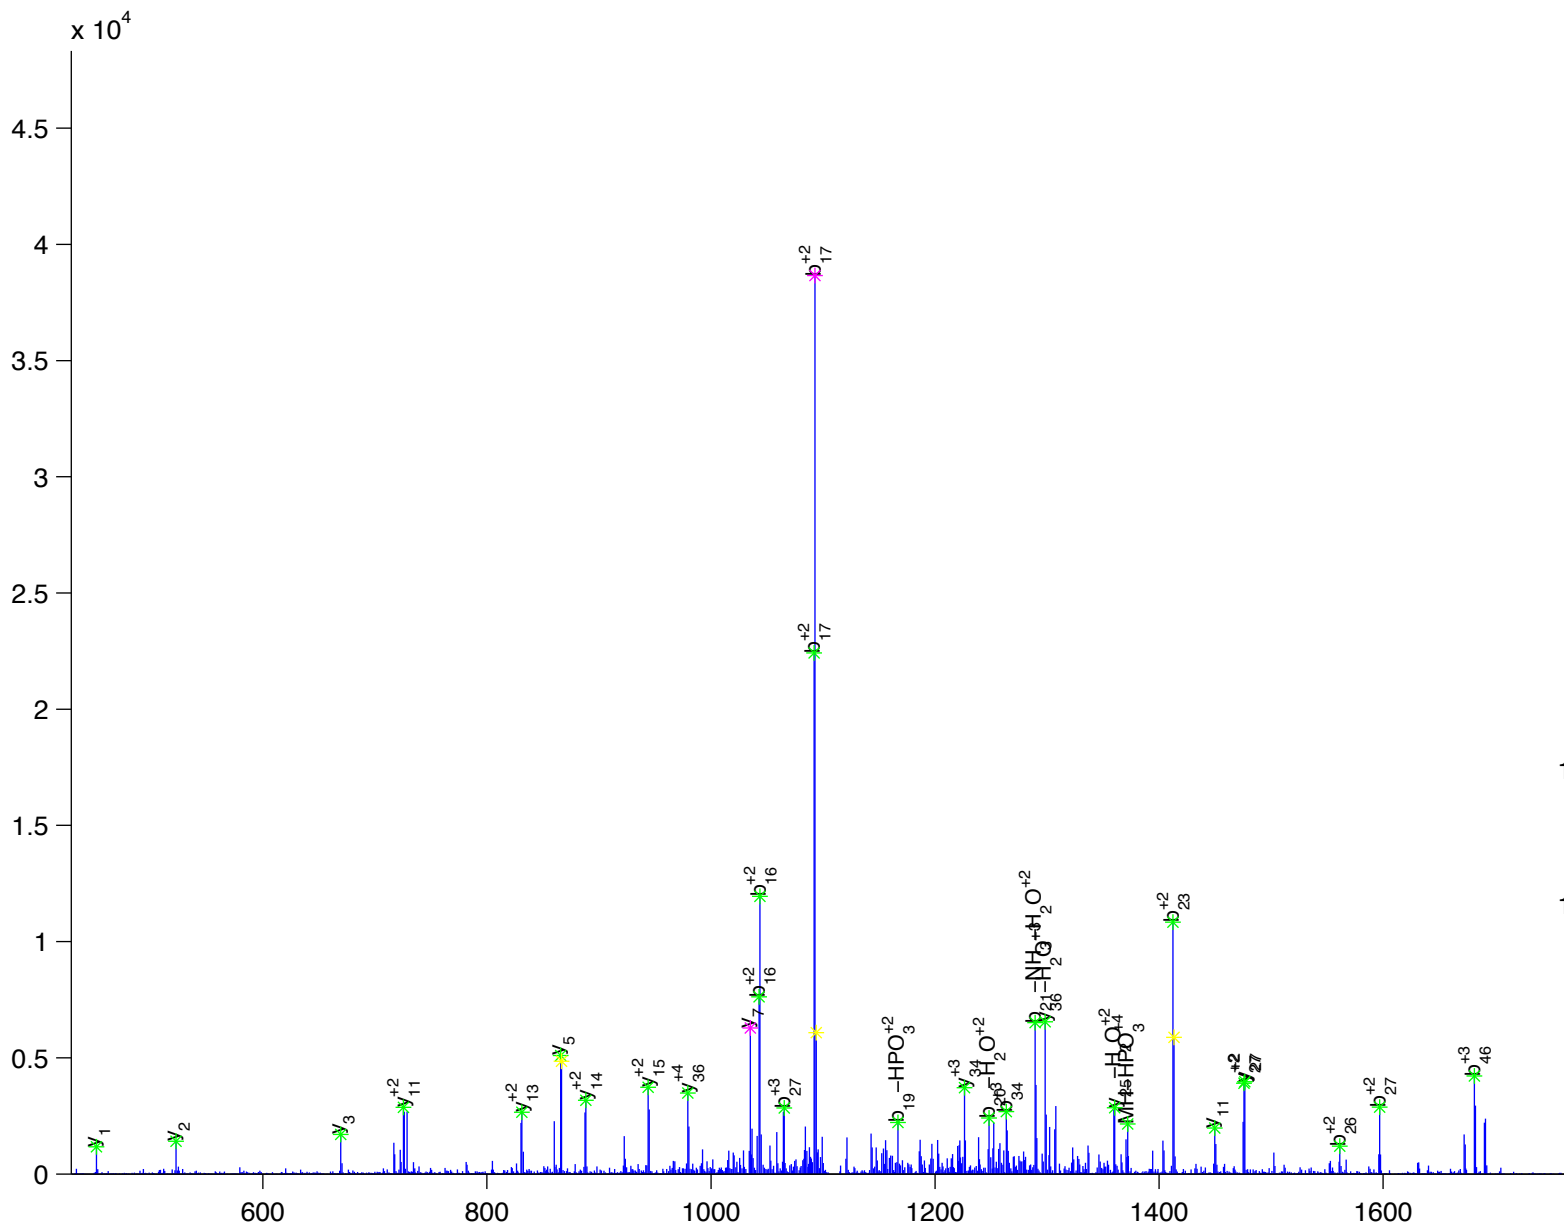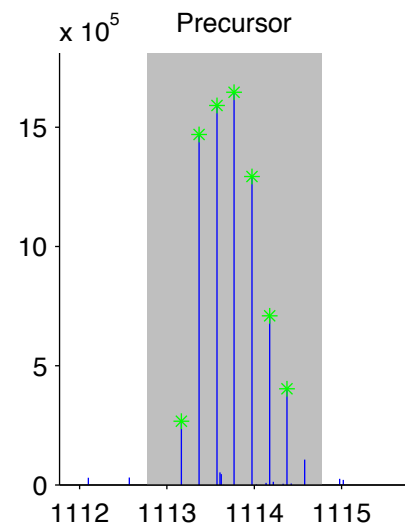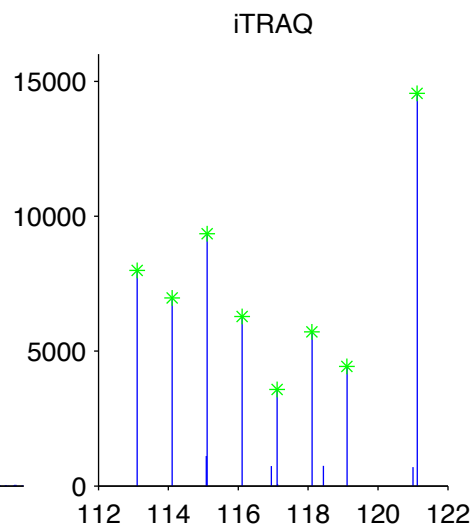



V[V]E[T]D[P]S[P]y[C]I[V]A[P]D[T]V[I]H[C]E[G]E[P]I[K]R

valosin containing protein

Charge State: +4

Scan Number: 7395

File Name: 090807ptp1blivers\_M\_HFD\_basal.raw

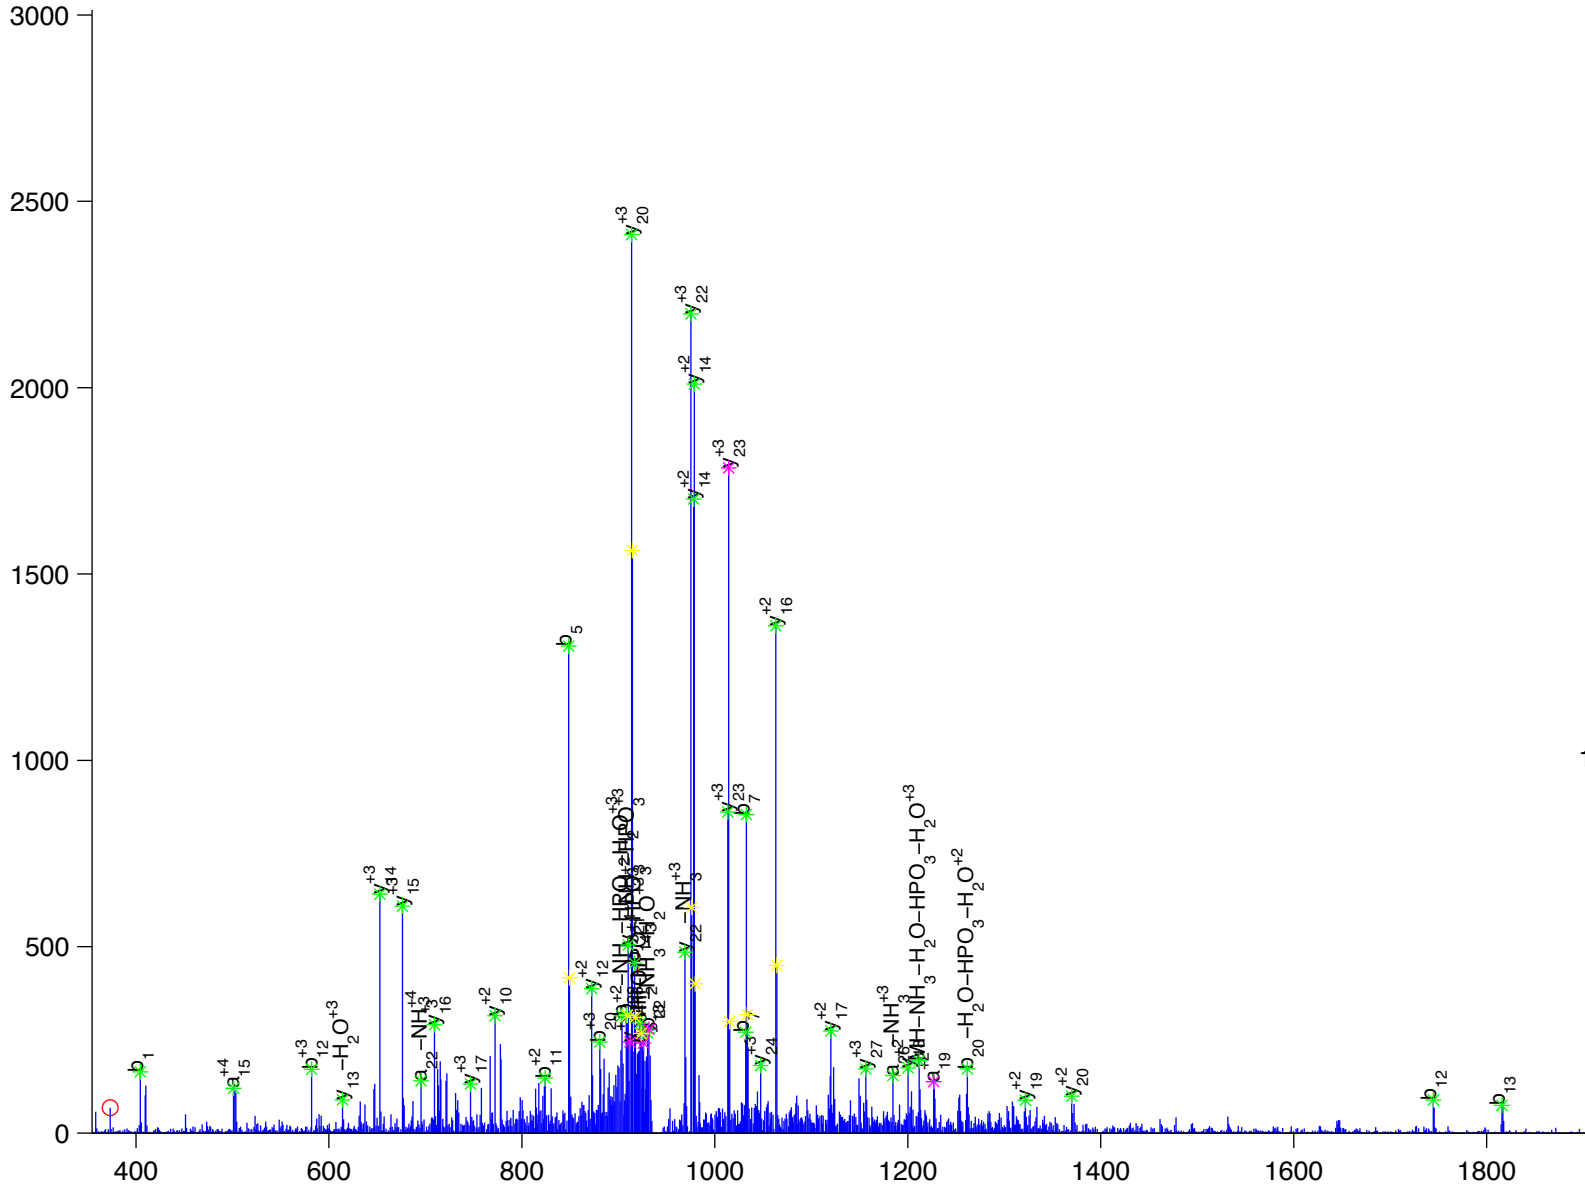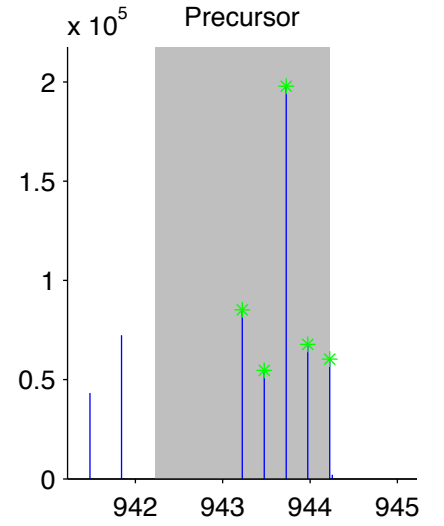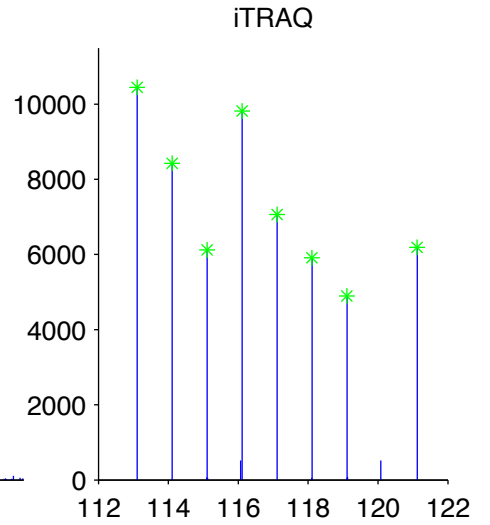

N P G N Q A A y E H F E T M K

vinculin  
 Charge State: +3  
 Scan Number: 4699  
 File Name: 091130ptp1blivers\_hfd\_basal2.raw

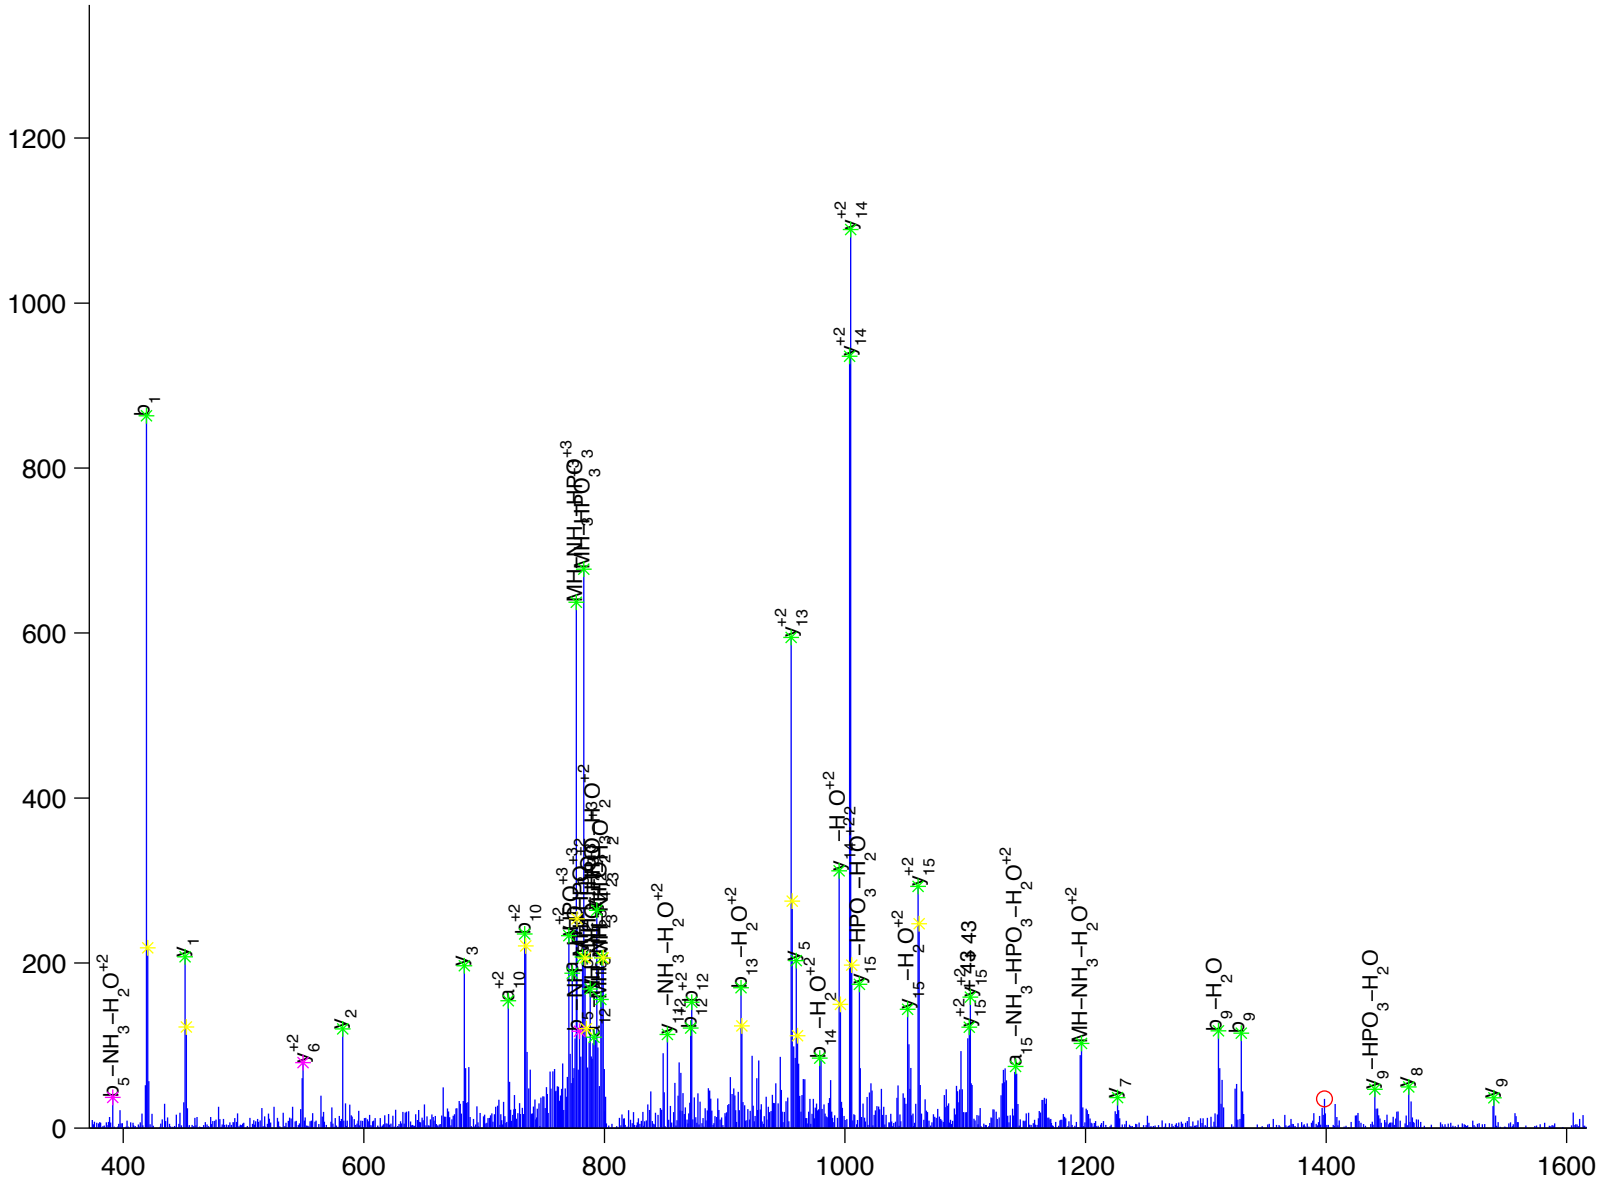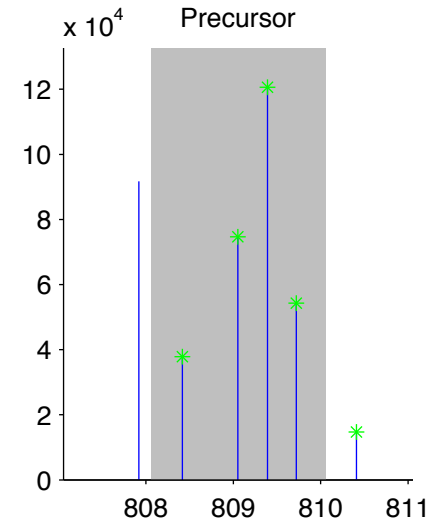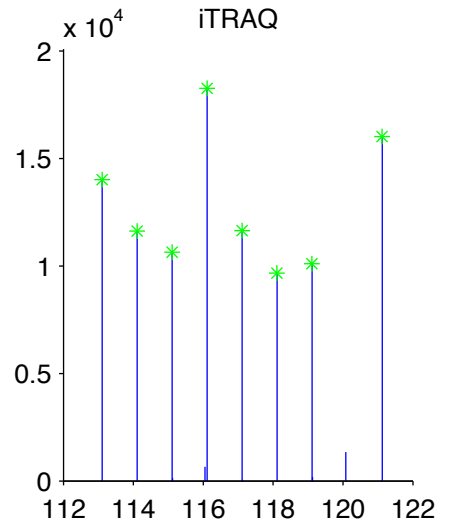

S [ F ] L [ D ] S [ G ] y [ ] R

vinculin  
 Charge State: +  
 Scan Number: 5319  
 File Name: 091130ptp1blivers\_hfd\_basal2.raw

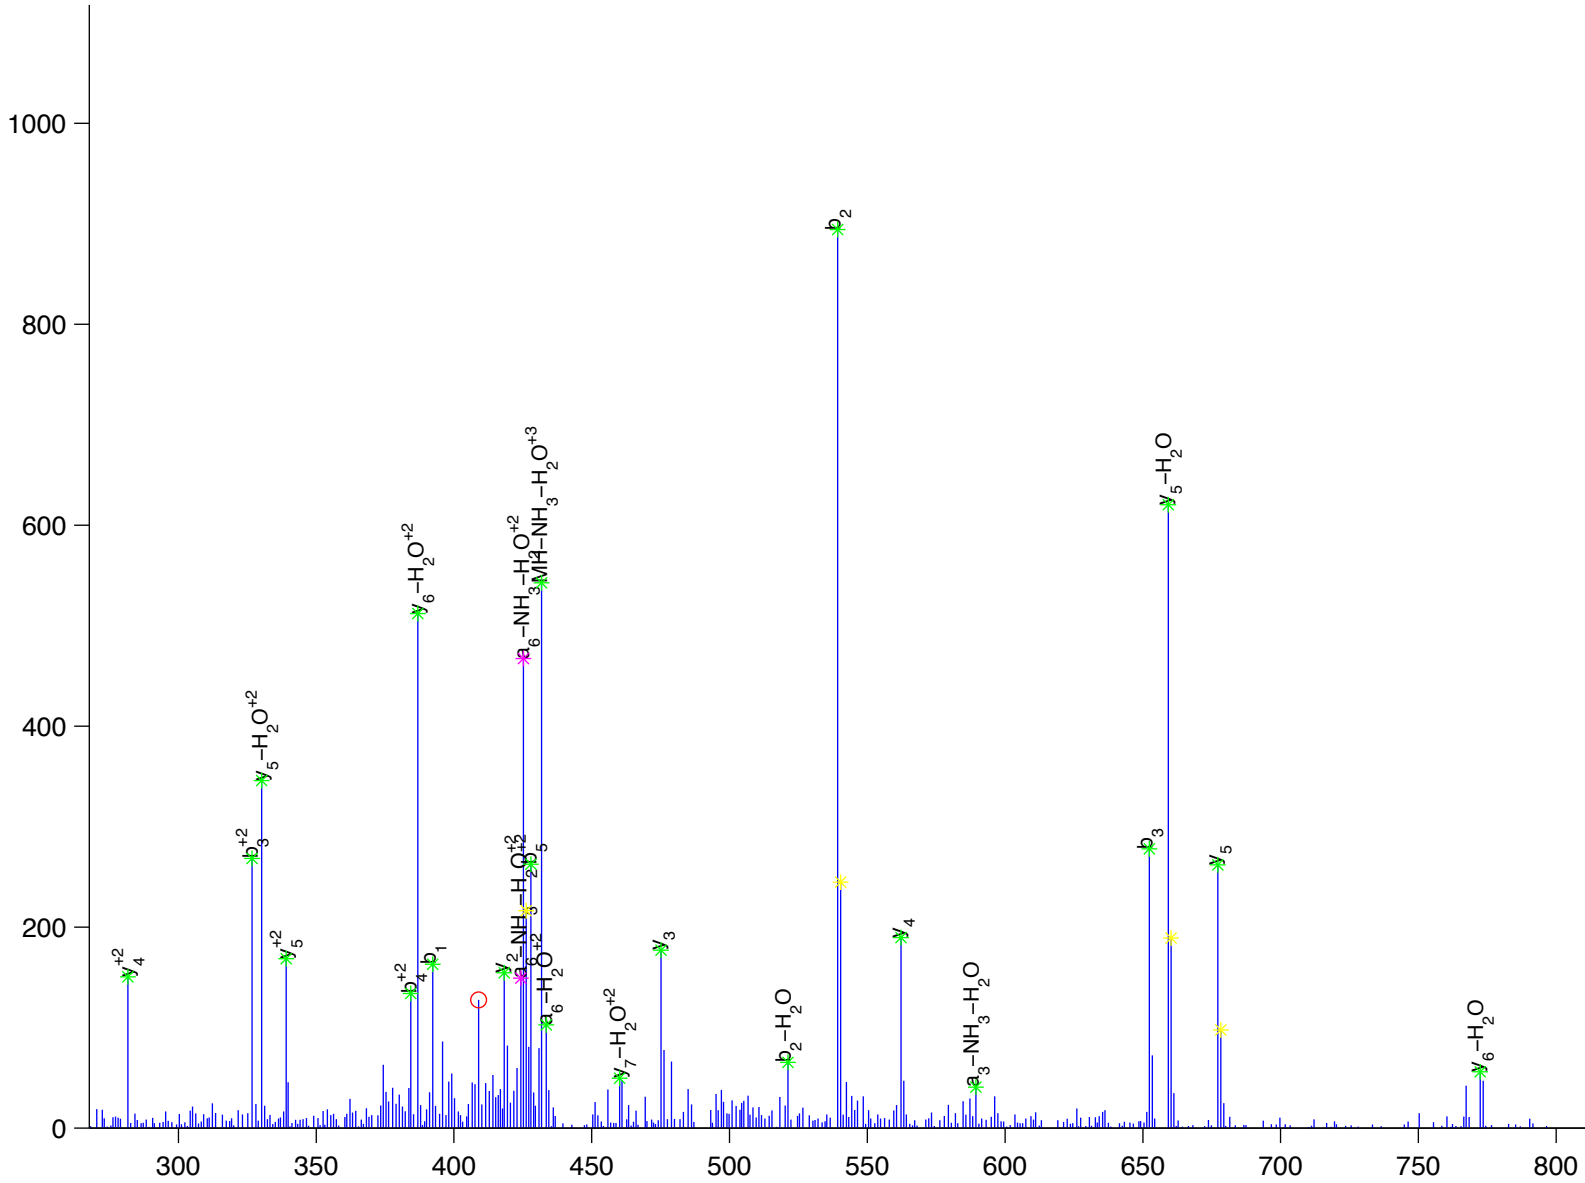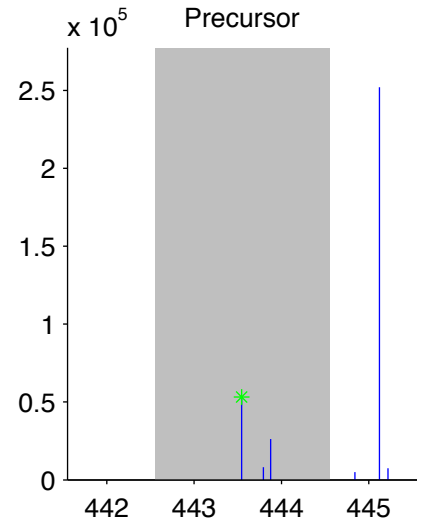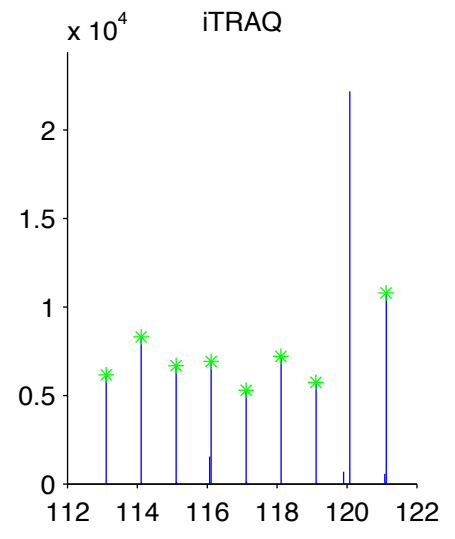

$\left[ \begin{array}{c} \text{K} \\ \text{L} \\ \text{D} \\ \text{N} \\ \text{G} \\ \text{G} \\ \text{y} \\ \text{Y} \\ \text{I} \\ \text{T} \\ \text{T} \end{array} \right] \text{R}$

viral oncogene yes homolog

Charge State: +3

Scan Number: 4691

File Name: 091130ptp1blivers\_hfd\_basal2.raw

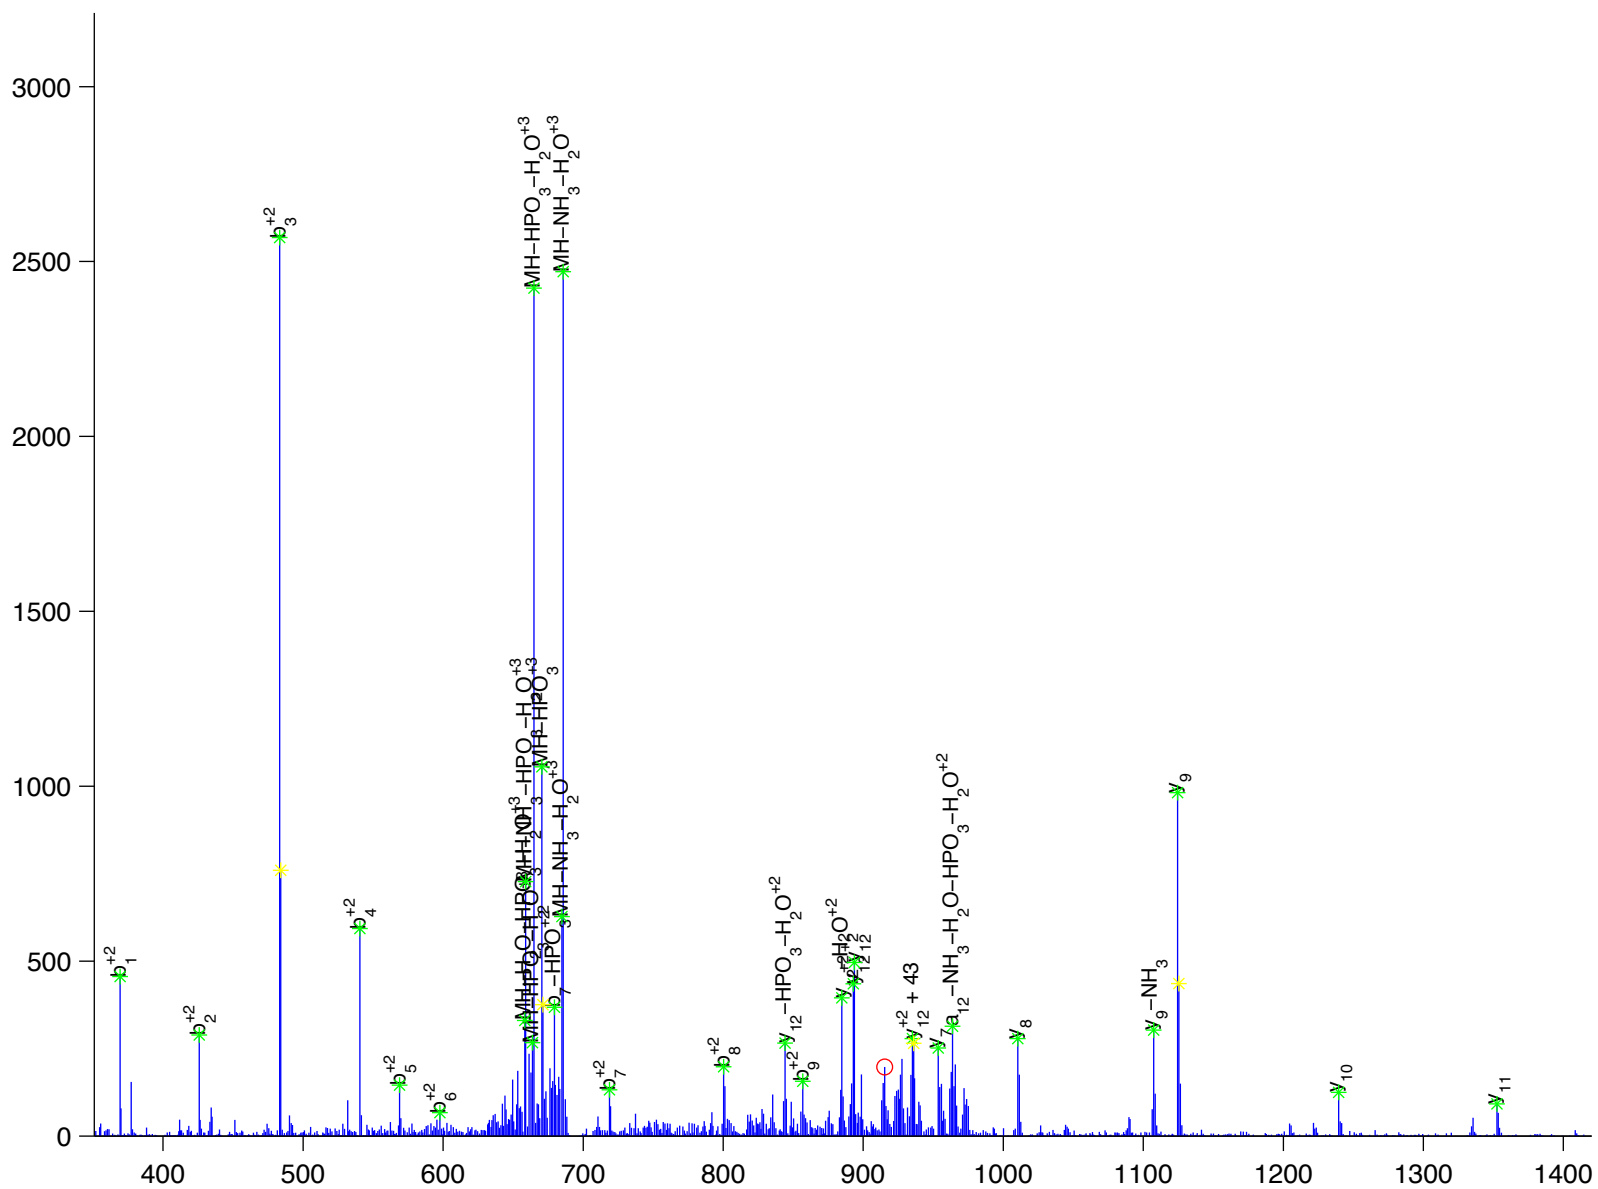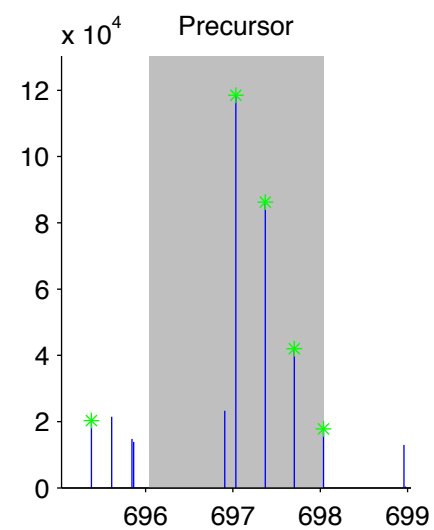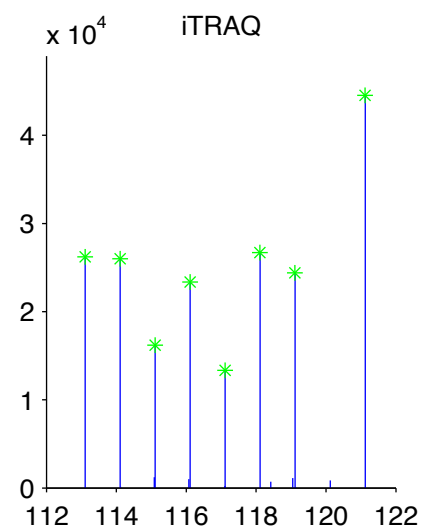



L I E D N E y T A R

viral oncogene yes homolog

Charge State: +2

Scan Number: 5107

File Name: 091130ptp1blivers\_hfd\_basal2.raw

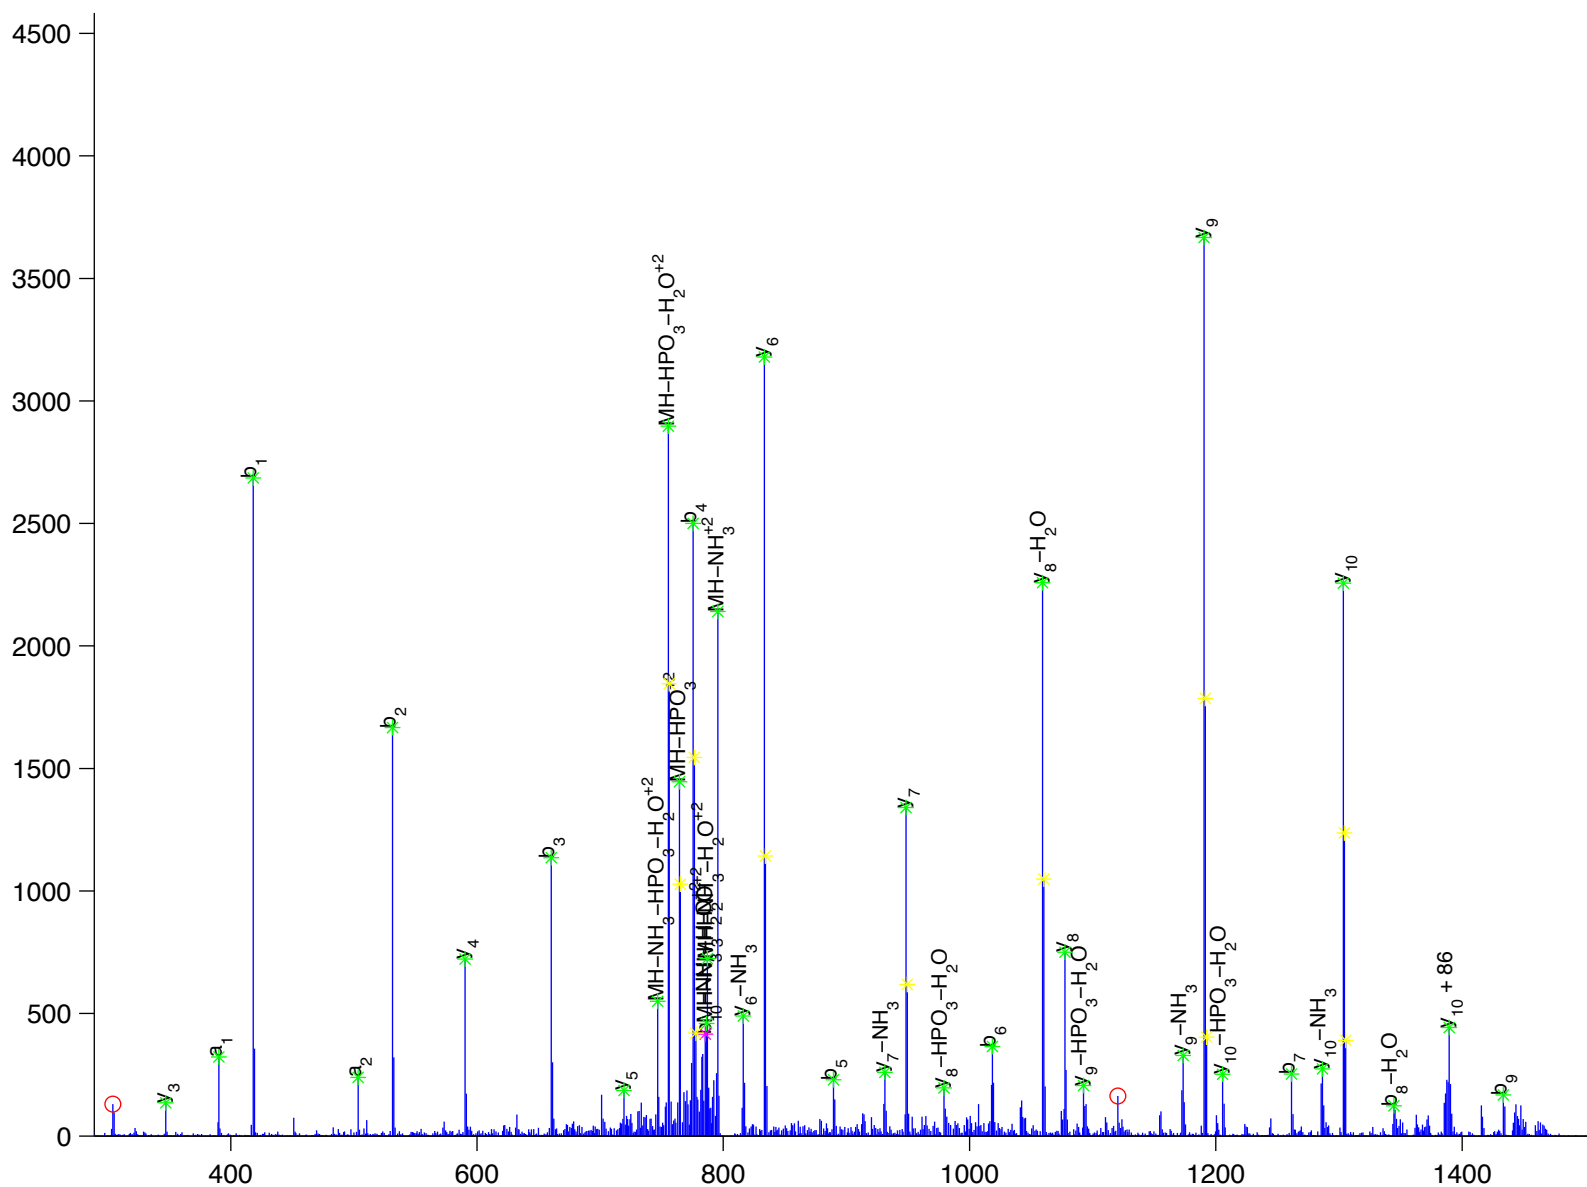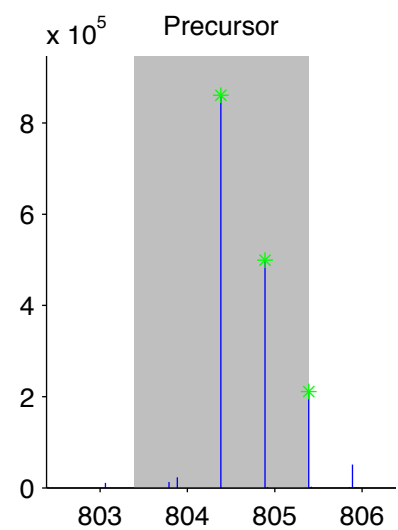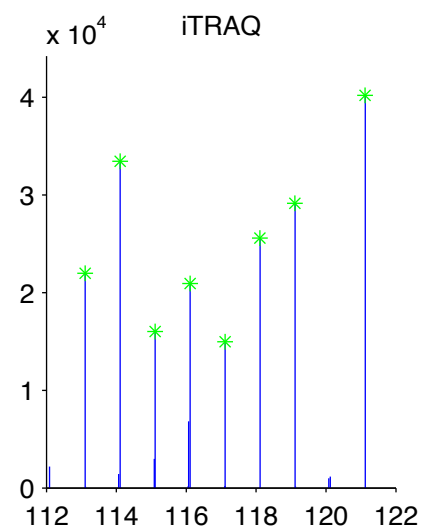



L [ D ] N [ G ] G [ y ] Y [ I ] T [ T ] R

viral oncogene yes homolog

Charge State: +2

Scan Number: 5142

File Name: 090806ptp1blivers\_M\_NC2.raw

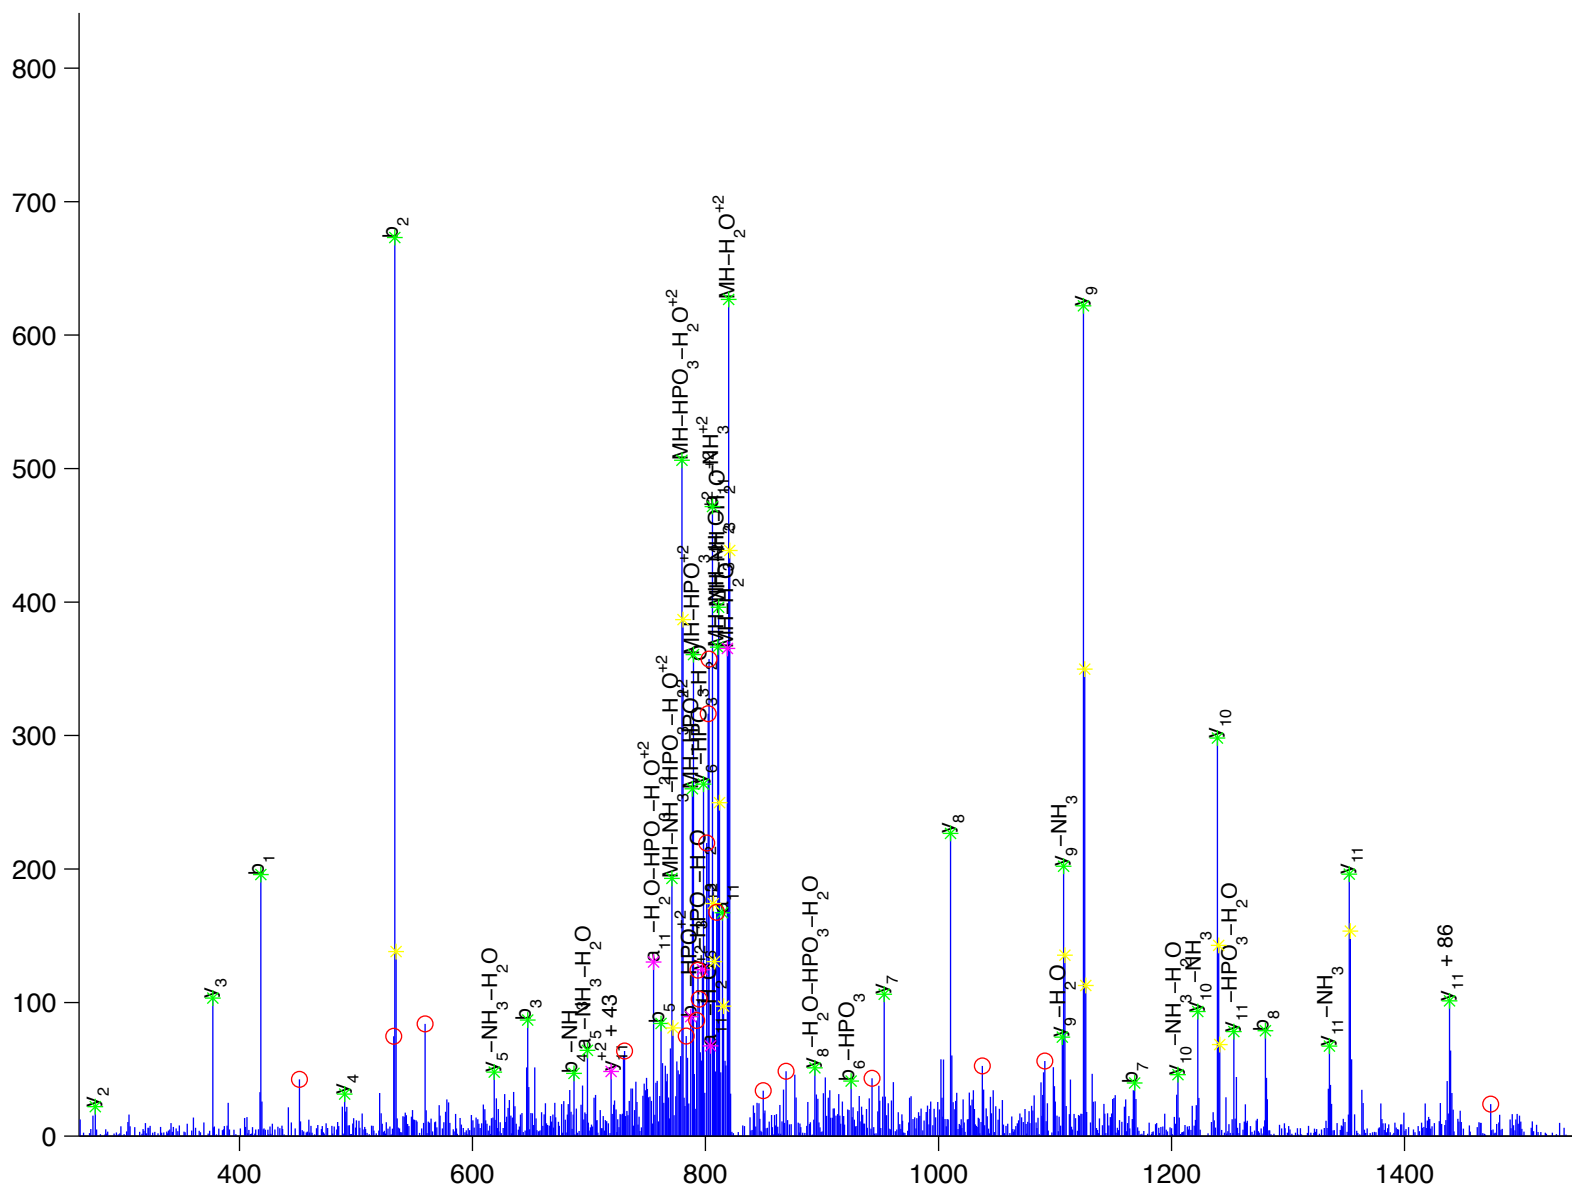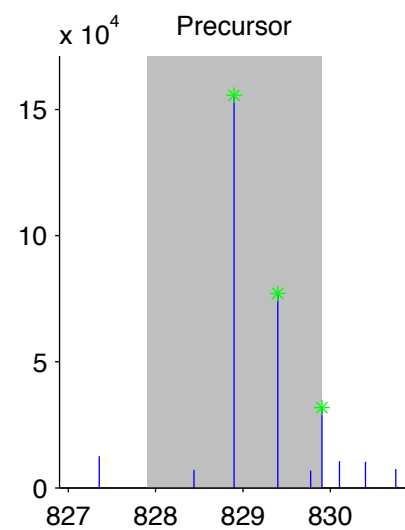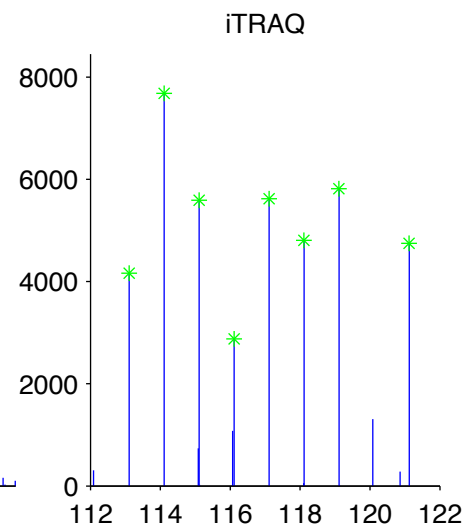

T [ D ] E [ F ] Q [ L ] H [ T ] N [ V ] N [ D ] G [ T ] E [ F ] G [ G ] S [ I ] y [ Q ] K

voltage-dependent anion channel 1

Charge State: +4

Scan Number: 6056

File Name: 090806ptp1blivers\_M\_NC2.raw

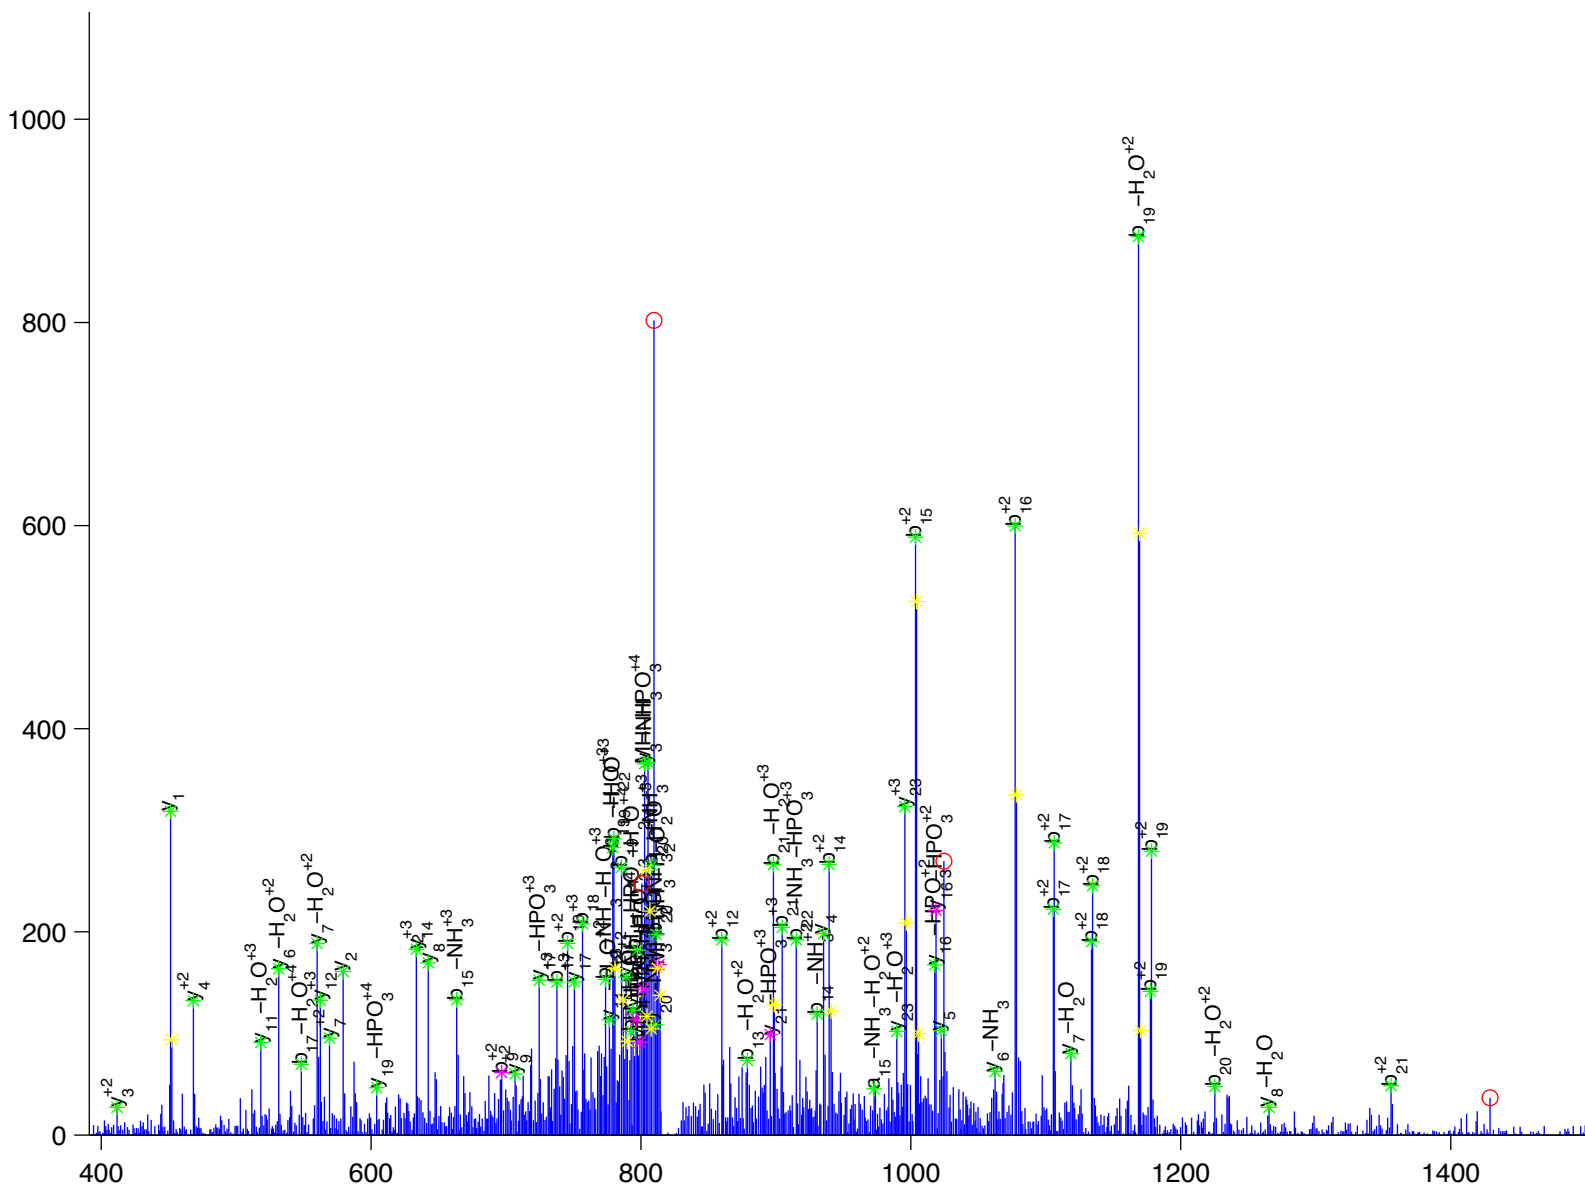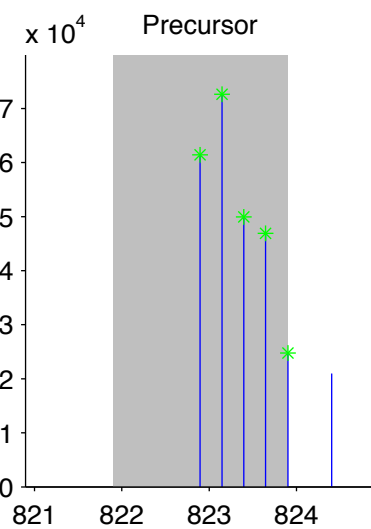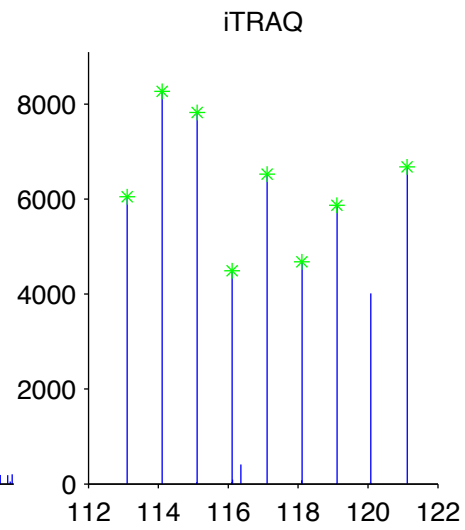

L I y D F I E D Q G G L E A V R

Wiskott-Aldrich syndrome homolog

Charge State: +3

Scan Number: 11030

File Name: 090806ptp1blivers\_M\_NC2.raw

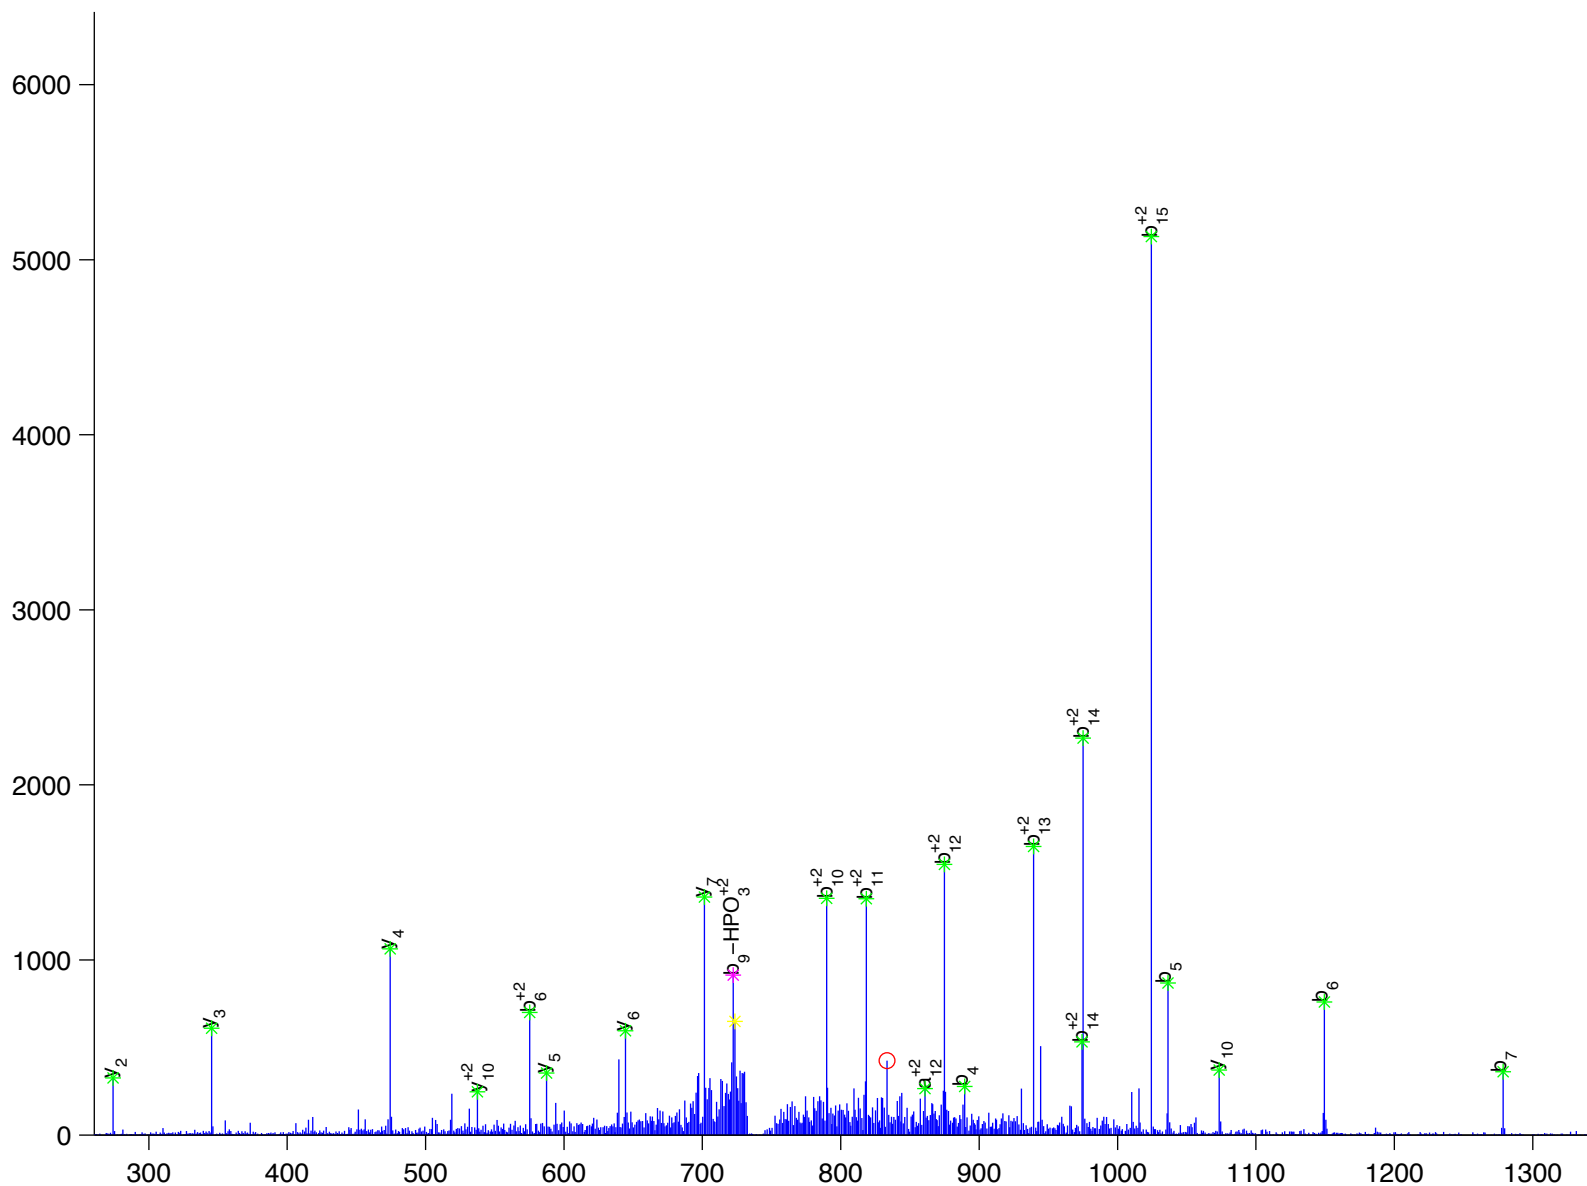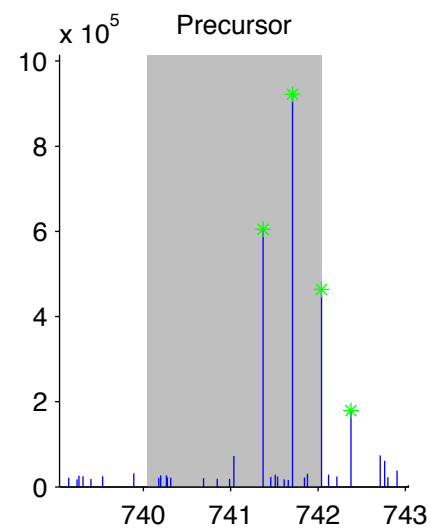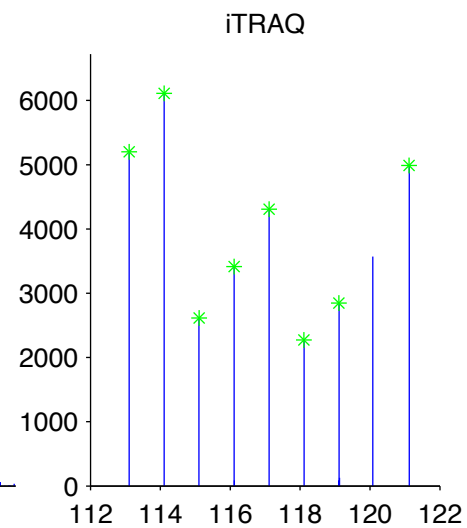

V I y D F I E K

Wiskott-Aldrich syndrome-like

Charge State: +3

Scan Number: 9417

File Name: 090806ptp1blivers\_M\_NC2.raw

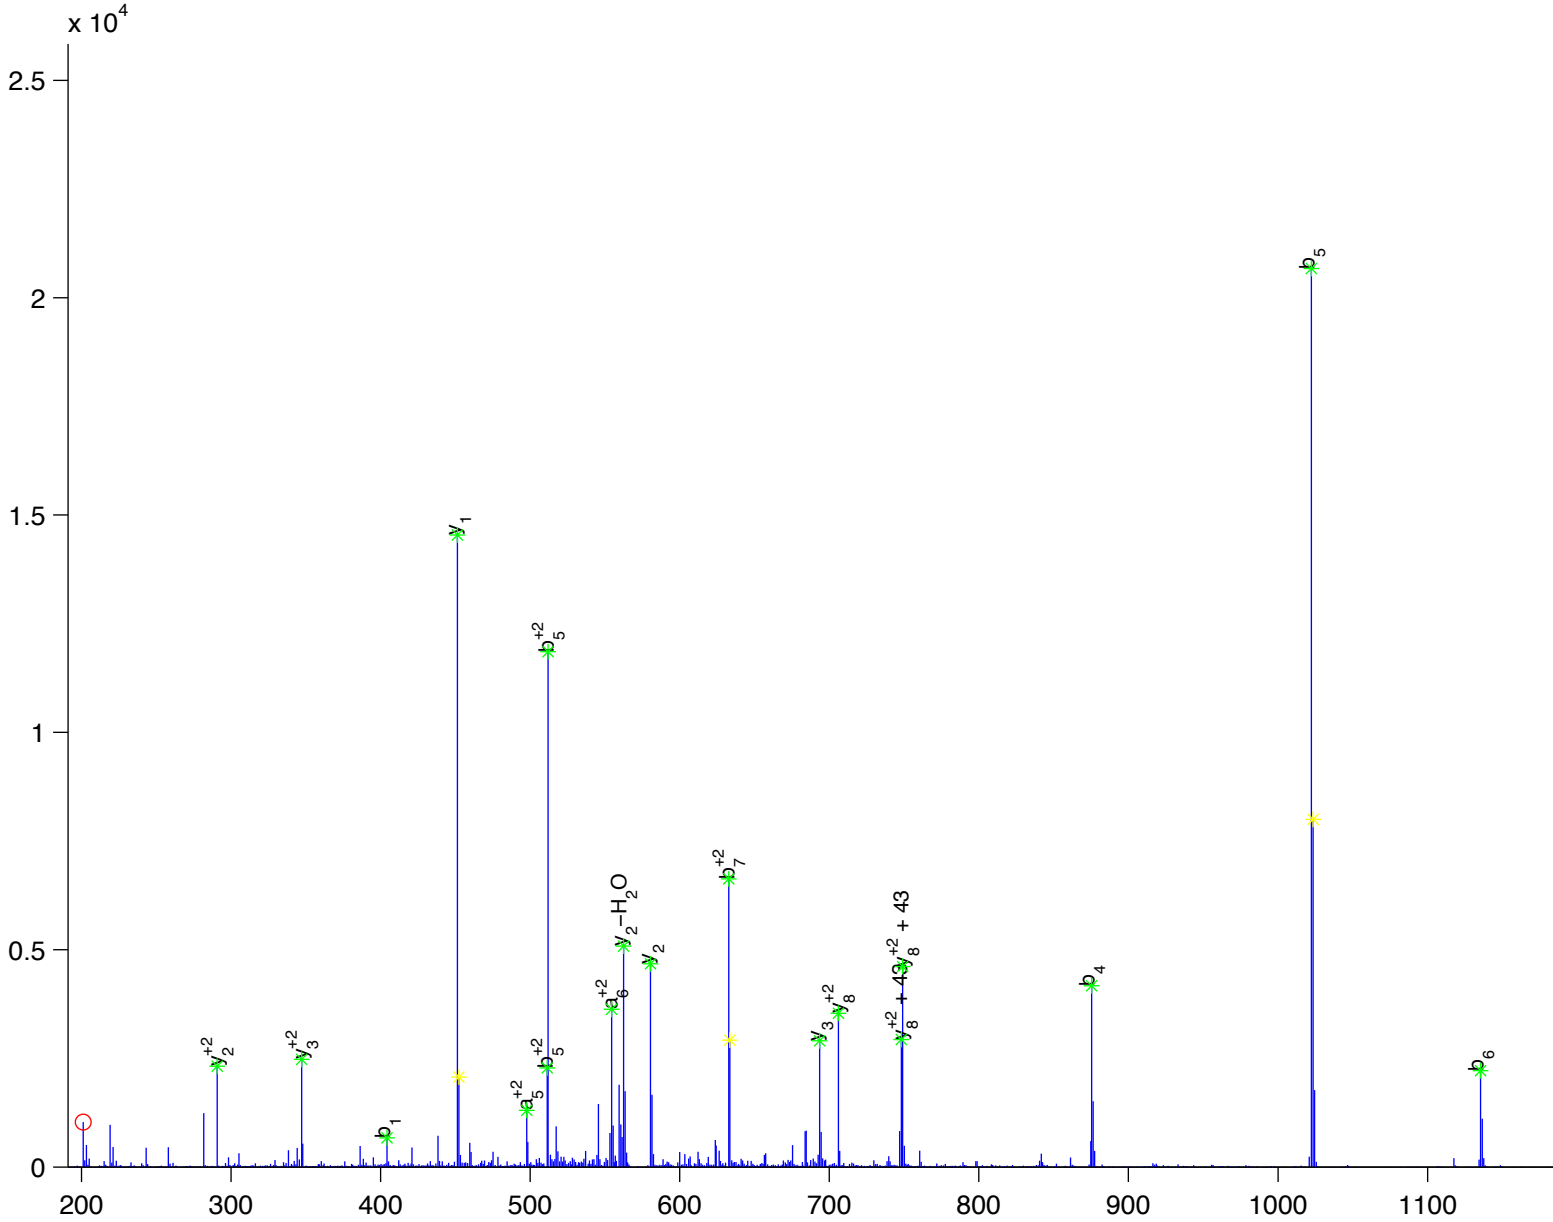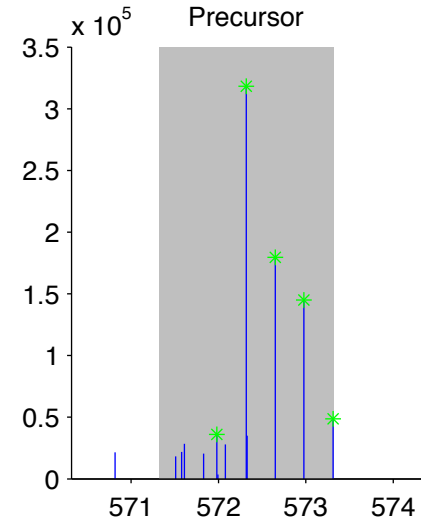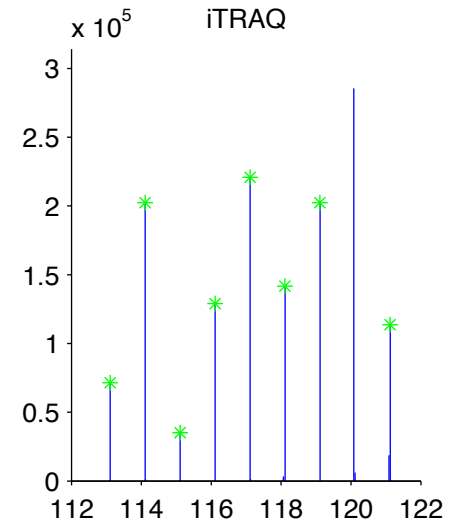

V I E D N E y T A R

Yamaguchi sarcoma viral (v-yes-1) oncogene homolog

Charge State: +2

Scan Number: 3913

File Name: 090806ptp1blivers\_M\_NC2.raw

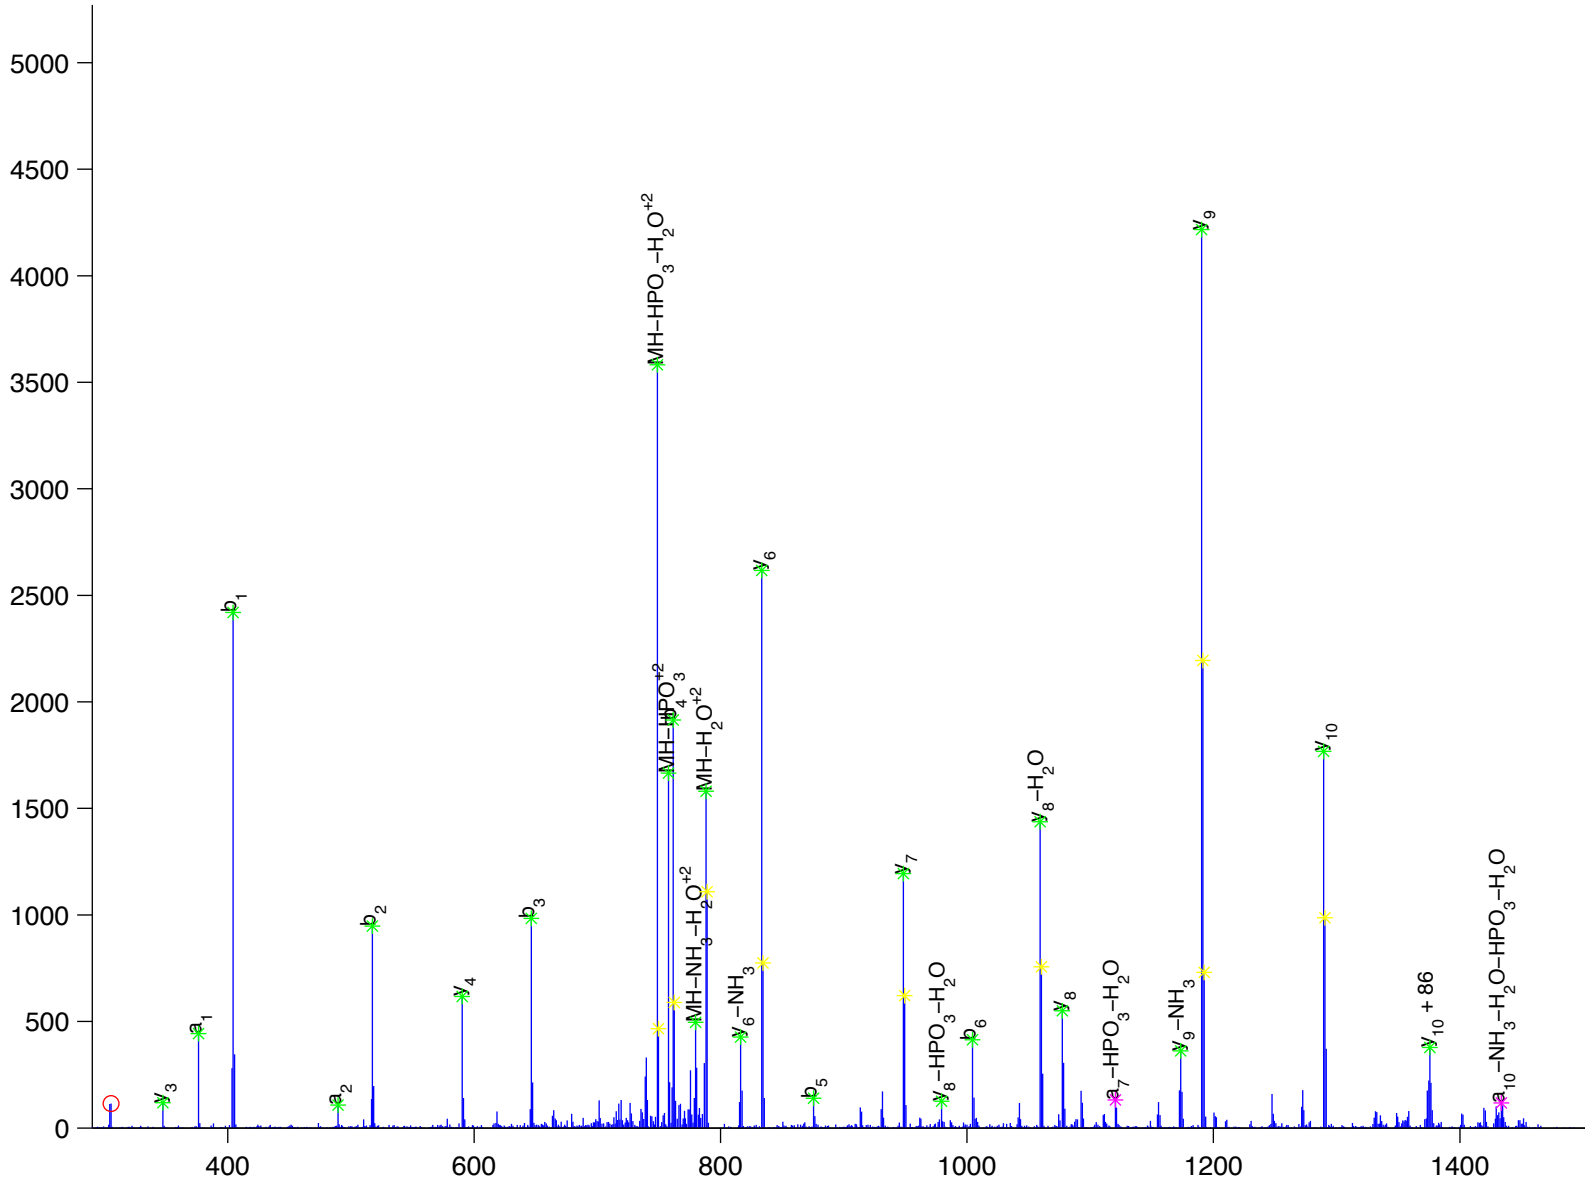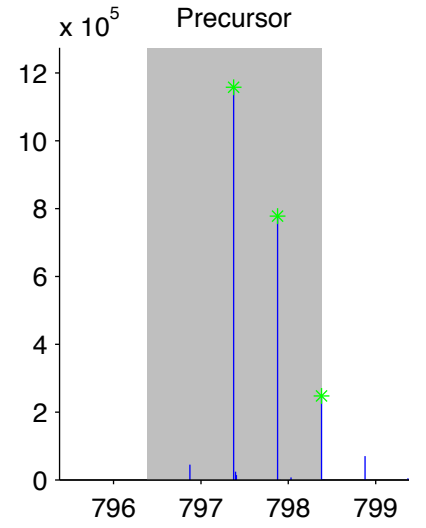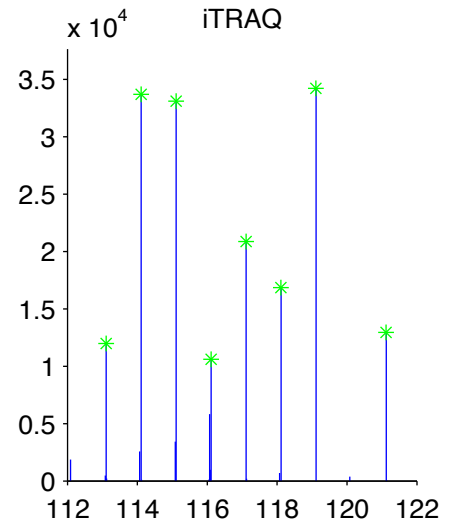



M [ E ] N [ C ] P [ D ] E [ L ] y [ D ] I [ M ] K

Yamaguchi sarcoma viral (v-yes-1) oncogene homolog

Charge State: +3

Scan Number: 5490

File Name: 100908ptp1blivers\_ncHFD3\_basal.raw

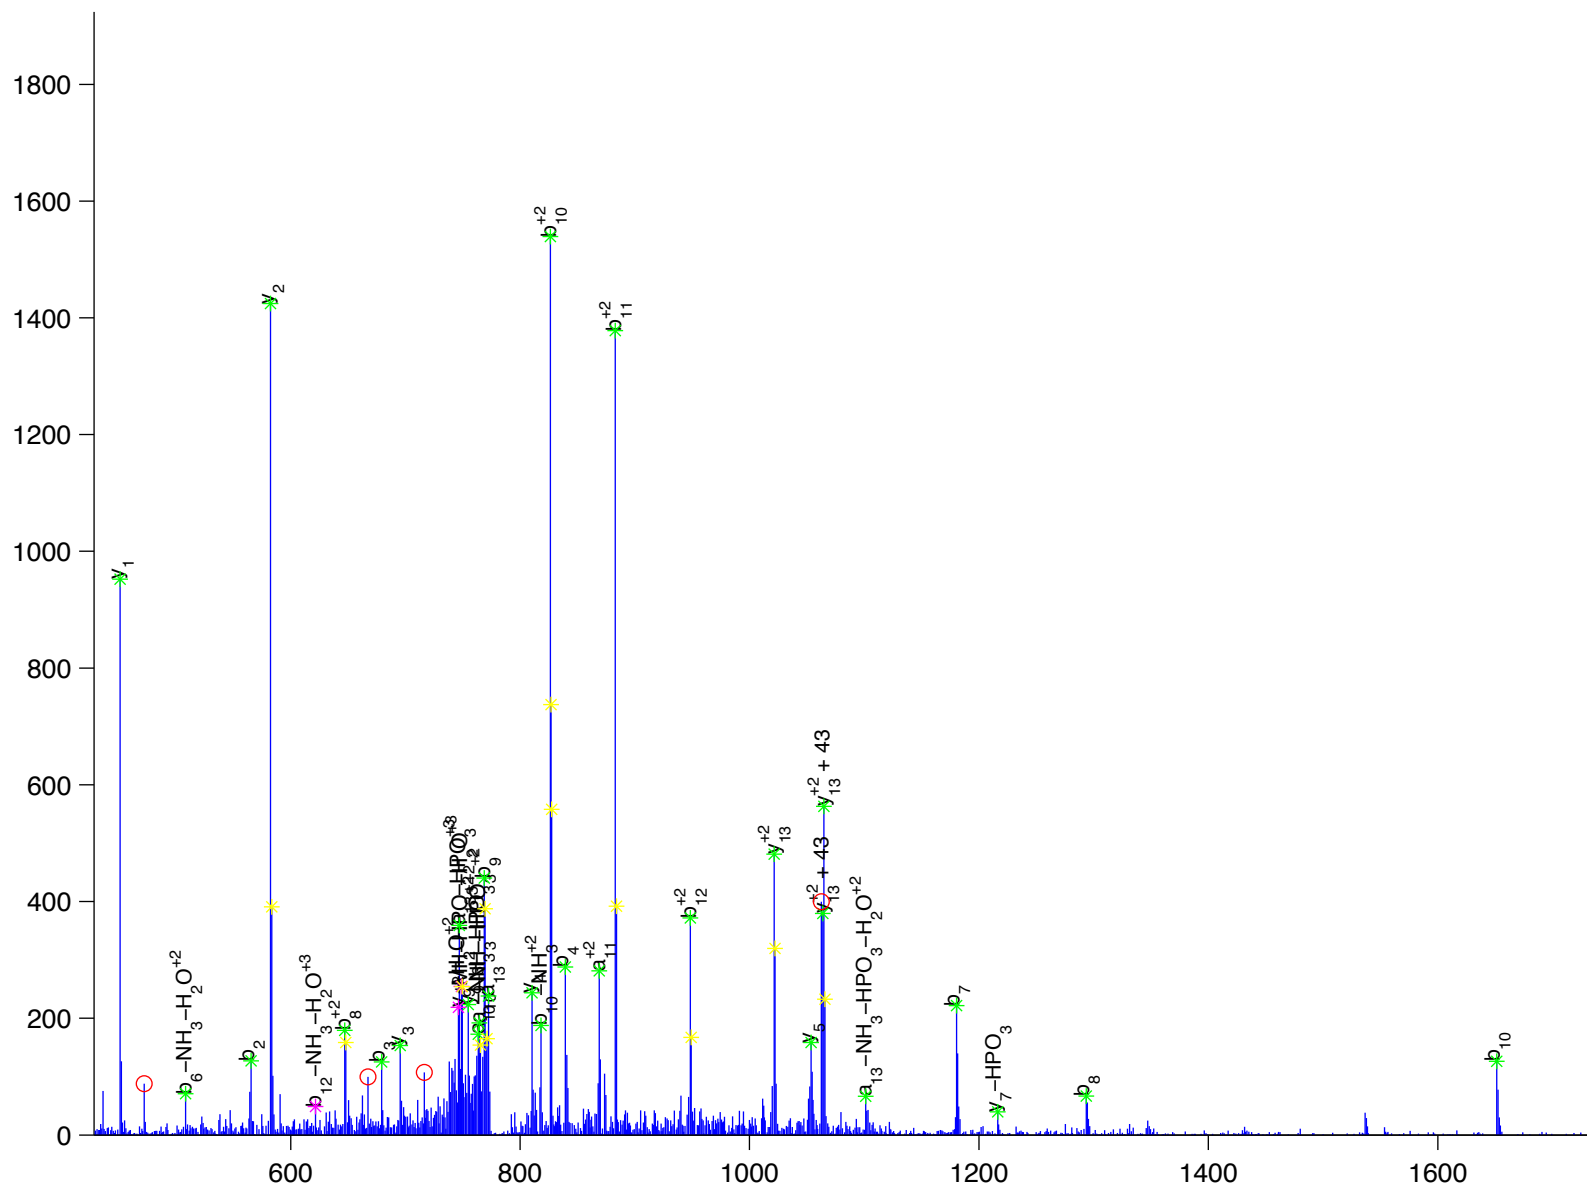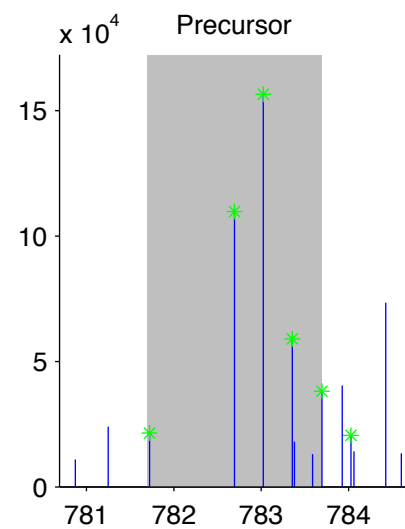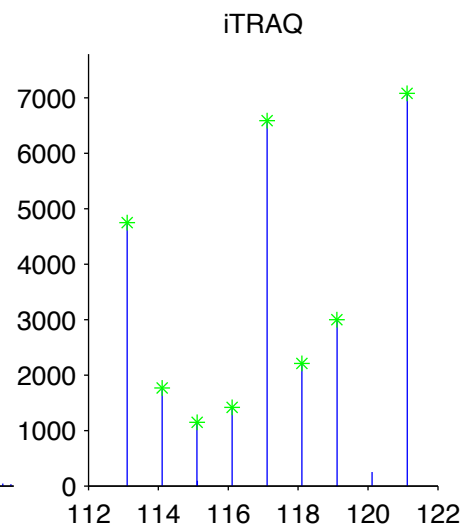

E [ A ] V [ y ] S [ G ] V [ Q ] S [ L ] R

zinc finger CCCH type, antiviral 1

Charge State: +2

Scan Number: 5684

File Name: HJ072909\_HFD\_E1.raw

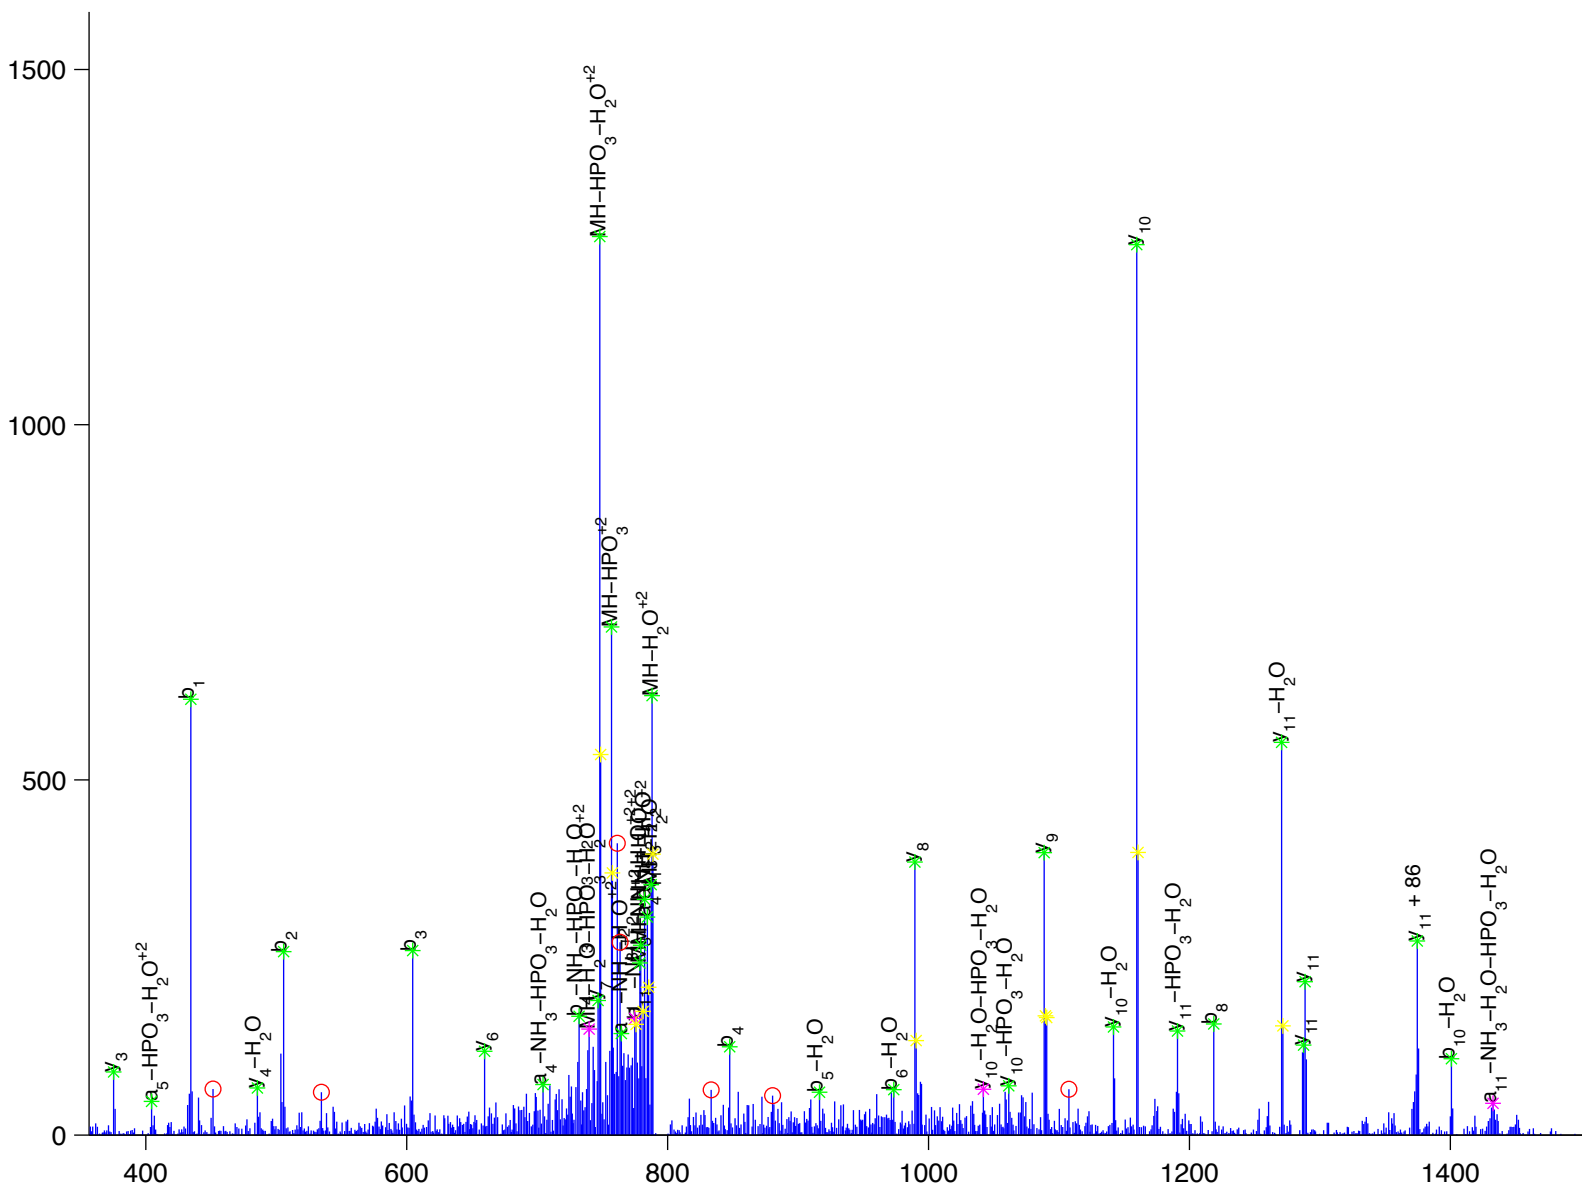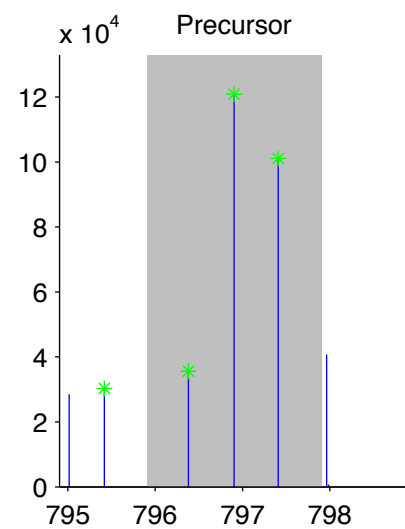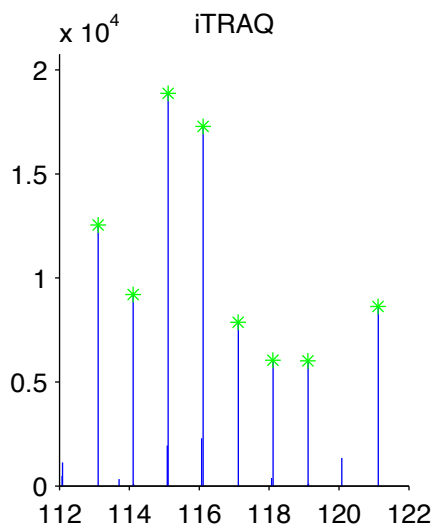

Supplement: NIHMS482406-supplement-ESI_2.pdf [file NIHMS482406-supplement-ESI_2.pdf]
